# Supplementary material for: Transition metal catalyzed selective B(3)–H or B(4)–H amination of o-carboranes via dehydrogenative BH/NH cross-coupling
Source: Royal Society of Chemistry journal article supplement (doi:10.1039/d2cc02852b), 2022-01-01

# Electronic Supplementary Information

## Transition Metal Catalyzed Selective B(3)-H or B(4)-H Amination of *o*-Carboranes via Dehydrogenative BH/NH Cross-Coupling

Hairong Lyu and Zuowei Xie\*

*Department of Chemistry and State Key Laboratory of Synthetic Chemistry, The Chinese  
University of Hong Kong, Shatin, New Territories, Hong Kong, China*

### Table of Contents

|                      |     |
|----------------------|-----|
| General Procedures   | S2  |
| Experimental Section | S3  |
| References           | S21 |
| NMR and HRMS spectra | S22 |

## 1. General Procedures

All reactions were carried out in flame-dried glassware under an atmosphere of dry argon with the exclusion of air and moisture using standard Schlenk techniques. All organic solvents were freshly distilled from sodium benzophenone ketyl immediately prior to use.  $^1\text{H}$ ,  $^{13}\text{C}$ ,  $^{11}\text{B}$  and  $^{19}\text{F}$  NMR spectra were recorded on a Bruker DPX 400/500 spectrometer at 400/500, 100/125, 128/160 and 376/470 MHz, respectively. All chemical shifts were reported in  $\delta$  units with references to the residual solvent resonances of the deuterated solvents for proton and carbon chemical shifts, to external  $\text{CFCl}_3$  (0.00) for fluorine chemical shifts, and to external  $\text{BF}_3 \cdot \text{OEt}_2$  (0.00 ppm) for boron chemical shifts. High Resolution Mass Spectra (HRMS) were obtained on a Thermo Q Exactive™ Focus Hybrid Quadrupole-Orbitrap™ Mass Spectrometer. GC-MS analyses were performed on Agilent GC-MS 6890N. Carboranyl carboxylic acids **a**<sup>1</sup> and 3-phenyl-*o*-carborane<sup>2</sup> were prepared according to literature methods. All other chemicals were purchased from either Aldrich or Acros Chemical Co. and used as received unless otherwise specified. Elemental analyses were performed by the Shanghai Institute of Organic Chemistry, CAS, China or MEDAC Ltd., U. K.

## 2. Experimental Section

**Table S1. Optimization of reaction conditions using tosylamide<sup>a</sup>**

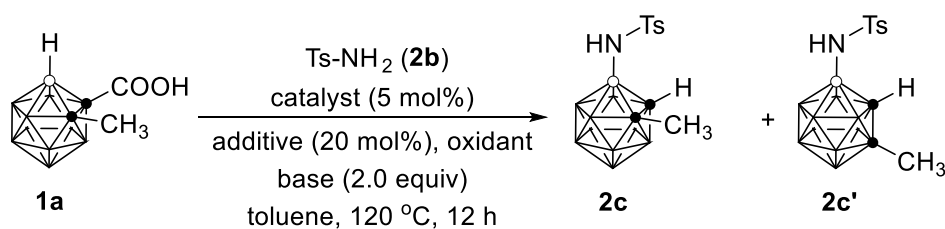

| entry             | catalyst | additive           | oxidant (equiv)                      | base                            | <b>2c</b><br>(%) <sup>b</sup> | <b>2c'</b><br>(%) <sup>b</sup> |
|-------------------|----------|--------------------|--------------------------------------|---------------------------------|-------------------------------|--------------------------------|
| 1                 | [Rh]     | AgSbF <sub>6</sub> | Cu(OAc) <sub>2</sub> (2)             | K <sub>2</sub> HPO <sub>4</sub> | 25                            | 4                              |
| 2                 | [Rh]     | AgNTf <sub>2</sub> | Cu(OAc) <sub>2</sub> (2)             | K <sub>2</sub> HPO <sub>4</sub> | 49                            | 8                              |
| 3                 | [Rh]     | AgNTf <sub>2</sub> | Cu(OTf) <sub>2</sub> (2)             | K <sub>2</sub> HPO <sub>4</sub> | trace                         | trace                          |
| 4                 | [Rh]     | AgNTf <sub>2</sub> | Ag <sub>2</sub> CO <sub>3</sub> (1)  | K <sub>2</sub> HPO <sub>4</sub> | 10                            | 5                              |
| 5                 | [Rh]     | AgNTf <sub>2</sub> | Cu(OAc) <sub>2</sub> (3)             | K <sub>2</sub> HPO <sub>4</sub> | 51                            | 9                              |
| 6                 | [Ir]     | AgNTf <sub>2</sub> | Cu(OAc) <sub>2</sub> (2)             | K <sub>2</sub> HPO <sub>4</sub> | 6                             | 12                             |
| 7                 | [Ru]     | AgNTf <sub>2</sub> | Cu(OAc) <sub>2</sub> (2)             | K <sub>2</sub> HPO <sub>4</sub> | 3                             | 16                             |
| 8                 | [Rh]     | AgNTf <sub>2</sub> | Cu(OAc) <sub>2</sub> (2) + TEMPO (1) | K <sub>2</sub> HPO <sub>4</sub> | 65                            | 3                              |
| 9                 | [Rh]     | AgNTf <sub>2</sub> | Cu(OAc) <sub>2</sub> (2) + TEMPO (1) | NaOAc                           | 85                            | 3                              |
| 10 <sup>c</sup>   | [Rh]     | AgNTf <sub>2</sub> | Cu(OAc) <sub>2</sub> (2) + TEMPO (1) | NaOAc                           | 84                            | 2                              |
| 11 <sup>d</sup>   | [Rh]     | AgNTf <sub>2</sub> | Cu(OAc) <sub>2</sub> (2) + TEMPO (1) | NaOAc                           | 73                            | 2                              |
| 12 <sup>c,e</sup> | [Rh]     | AgNTf <sub>2</sub> | Cu(OAc) <sub>2</sub> (2) + TEMPO (1) | NaOAc                           | 83                            | 2                              |

<sup>a</sup>Reaction conditions: **1a** (0.05 mmol) and tosylamide (0.20 mmol) in of toluene in a closable flask; AgSbF<sub>6</sub> = silver hexafluoroantimonate(V); AgNTf<sub>2</sub> = silver bis(trifluoromethanesulfonyl)imide; [Rh] = [Cp\**Rh*Cl<sub>2</sub>]<sub>2</sub>; [Ir] = [Cp\**Ir*Cl<sub>2</sub>]<sub>2</sub>; [Ru] = [Ru(*p*-cymene)Cl<sub>2</sub>]<sub>2</sub>; TEMPO = (2,2,6,6-Tetramethylpiperidin-1-yl)oxyl; <sup>b</sup>Yield determined by GC-MS; <sup>c</sup>2.0 equiv of TsNH<sub>2</sub> was used; <sup>d</sup>1.2 equiv of TsNH<sub>2</sub> was used; <sup>e</sup>3 mol% of [Cp\**Rh*Cl<sub>2</sub>]<sub>2</sub> was used.

**Table S2.** Optimization of reaction conditions using aniline<sup>a</sup>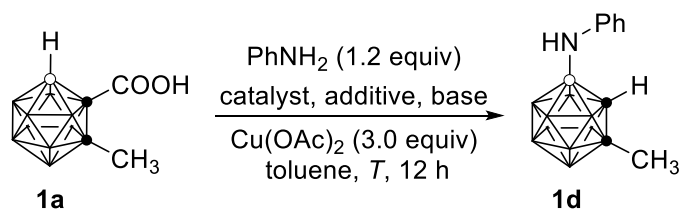

| entry           | catalyst (5 mol%) | additive (mol%)                      | base (equiv)                        | <i>T</i> (°C) | <b>1d</b> (%) <sup>b</sup> |
|-----------------|-------------------|--------------------------------------|-------------------------------------|---------------|----------------------------|
| 1               | [Ir]              | -                                    | Li <sub>2</sub> CO <sub>3</sub> (2) | 140           | 27                         |
| 2               | [Ir]              | AgOAc (20)                           | Li <sub>2</sub> CO <sub>3</sub> (2) | 140           | 60                         |
| 3               | [Ir]              | AgNTf <sub>2</sub> (20)              | Li <sub>2</sub> CO <sub>3</sub> (2) | 140           | 20                         |
| 4               | [Ir]              | AgOAc (10) + AgNTf <sub>2</sub> (10) | Li <sub>2</sub> CO <sub>3</sub> (2) | 140           | 96                         |
| 5               | [Ir]              | AgOAc (10) + AgNTf <sub>2</sub> (10) | Li <sub>2</sub> CO <sub>3</sub> (2) | 120           | 97                         |
| 6               | [Ir]              | AgOAc (10) + AgNTf <sub>2</sub> (10) | Li <sub>2</sub> CO <sub>3</sub> (2) | 100           | 88                         |
| 7               | [Ir]              | AgOAc (10) + AgNTf <sub>2</sub> (10) | Li <sub>2</sub> CO <sub>3</sub> (2) | 80            | 40                         |
| 8               | [Ir]              | AgOAc (10) + AgNTf <sub>2</sub> (10) | NaOAc (2)                           | 120           | 66                         |
| 9               | [Ir]              | AgOAc (10) + AgNTf <sub>2</sub> (10) | -                                   | 120           | 33                         |
| 10 <sup>c</sup> | [Ir]              | AgOAc (10) + AgNTf <sub>2</sub> (10) | Li <sub>2</sub> CO <sub>3</sub> (2) | 120           | 96                         |
| 11              | [Rh]              | AgOAc (10) + AgNTf <sub>2</sub> (10) | Li <sub>2</sub> CO <sub>3</sub> (2) | 120           | trace                      |

<sup>a</sup>Reaction conditions: **1a** (0.05 mmol) and aniline (0.06 mmol) in 1.0 mL of toluene in a closed flask; AgNTf<sub>2</sub> = silver bis(trifluoromethanesulfonyl)imide; [Ir] = [Cp\*IrCl<sub>2</sub>]<sub>2</sub>; [Rh] = [Cp\*RhCl<sub>2</sub>]<sub>2</sub>; <sup>b</sup>Yields determined by GC-MS. <sup>c</sup>3 mol% of [Cp\*IrCl<sub>2</sub>]<sub>2</sub> was used.



**Table S3.** Optimization of reaction conditions using cyclohexylamine<sup>a</sup>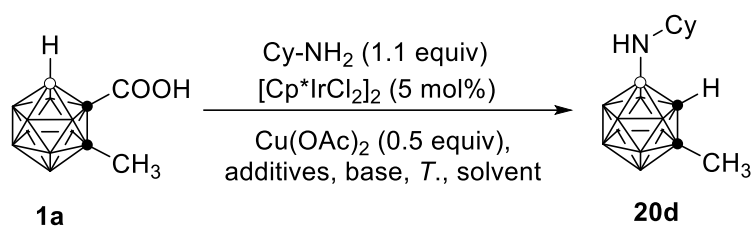

| entry           | additives (equiv)                      | base (equiv)                        | <i>T</i> (°C) | solvent | <b>20d</b> (%) <sup>b</sup> |
|-----------------|----------------------------------------|-------------------------------------|---------------|---------|-----------------------------|
| 1 <sup>c</sup>  | AgOAc (0.1) + AgNTf <sub>2</sub> (0.1) | Li <sub>2</sub> CO <sub>3</sub> (2) | 120           | toluene | 0                           |
| 2 <sup>c</sup>  | AgOAc (0.1) + AgNTf <sub>2</sub> (0.1) | Li <sub>2</sub> CO <sub>3</sub> (2) | 120           | THF     | 0                           |
| 3 <sup>c</sup>  | AgOAc (0.1) + AgNTf <sub>2</sub> (0.1) | Li <sub>2</sub> CO <sub>3</sub> (2) | 120           | DCE     | trace                       |
| 4 <sup>c</sup>  | AgOAc (1) + AgNTf <sub>2</sub> (1)     | Li <sub>2</sub> CO <sub>3</sub> (2) | 120           | DCE     | 53                          |
| 5               | AgOAc (1) + AgNTf <sub>2</sub> (1)     | Li <sub>2</sub> CO <sub>3</sub> (2) | 120           | DCE     | 70                          |
| 6 <sup>d</sup>  | AgOAc (1) + AgNTf <sub>2</sub> (1)     | Li <sub>2</sub> CO <sub>3</sub> (2) | 120           | DCE     | trace                       |
| 7               | AgOAc (2) + AgNTf <sub>2</sub> (1)     | Li <sub>2</sub> CO <sub>3</sub> (2) | 120           | DCE     | 77                          |
| 8               | AgOAc (3) + AgNTf <sub>2</sub> (1)     | Li <sub>2</sub> CO <sub>3</sub> (2) | 120           | DCE     | 96                          |
| 9               | AgOAc (3) + AgNTf <sub>2</sub> (1)     | -                                   | 120           | DCE     | 94                          |
| 10              | AgOAc (3) + AgNTf <sub>2</sub> (1)     | -                                   | 90            | DCE     | 93                          |
| 11              | AgOAc (3) + AgNTf <sub>2</sub> (1)     | -                                   | 50            | DCE     | 93                          |
| 12              | AgOAc (3) + AgNTf <sub>2</sub> (1)     | -                                   | r.t.          | DCE     | 50                          |
| 13              | AgOAc (3) + AgNTf <sub>2</sub> (0.2)   | -                                   | 50            | DCE     | 49                          |
| 14              | AgOAc (3) + AgNTf <sub>2</sub> (0.5)   | -                                   | 50.           | DCE     | 71                          |
| 15              | AgOAc (3)                              | -                                   | 50            | DCE     | trace                       |
| 16 <sup>e</sup> | AgOAc (3) + AgNTf <sub>2</sub> (1)     | -                                   | 50            | DCE     | 82                          |

<sup>a</sup>Reaction conditions: **1a** (0.050 mmol) and cyclohexylamine (0.055 mmol) in 1.0 mL of solvent in a closable flask; AgNTf<sub>2</sub> = silver bis(trifluoromethanesulfonyl)imide; <sup>b</sup>Yield determined by GC-MS. <sup>c</sup>3.0 equiv Cu(OAc)<sub>2</sub> was added. <sup>d</sup>In the absence of Cu(OAc)<sub>2</sub>. <sup>e</sup>3 mol% of [Cp\*IrCl<sub>2</sub>]<sub>2</sub> was used.

### Preparation of B(3)-sulfonamino-*o*-carboranes (c).

**A representative procedure.** 1-COOH-*o*-carborane **a** (0.10 mmol), sulfonamides **b** (2.0 equiv, 0.20 mmol), [Cp\*RhCl<sub>2</sub>]<sub>2</sub> (1.9 mg, 3.0 mol%, 0.003 mmol), AgNTf<sub>2</sub> (7.8 mg, 20 mol%, 0.02 mmol), Cu(OAc)<sub>2</sub> (36.3 mg, 2.0 equiv, 0.20 mmol), TEMPO (15.6 mg, 1.0 equiv, 0.10 mmol), and NaOAc (16.4 mg, 2.0 equiv, 0.20 mmol) were mixed in dry toluene (2.0 mL). The resulting mixture was heated in a closed flask at 120 °C for 12 h under argon. Then, the reaction solution was filtered through a pad of Celite and washed with diethyl ether. The organic portions were combined. After removal of organic solvents under reduced pressure, the residue was subjected to flash column chromatography on silica gel (230-400 mesh) using a mixture of *n*-hexane, dichloromethane and ethyl acetate (20/10/1 in v/v) as eluent to give the product **c**.

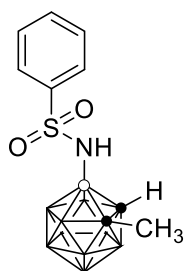

**1c:** Yield 71% (22.2 mg). White solid. <sup>1</sup>H NMR (400 MHz, CDCl<sub>3</sub>): 7.94 (d, *J* = 7.6 Hz, 2H), 7.64 (t, *J* = 7.4 Hz, 1H), 7.57 (m, 2H) (aryl *CH*), 5.63 (s, 1H) (*NH*), 4.21 (s, 1H) (cage *CH*), 2.07 (s, 3H) (*CH*<sub>3</sub>). <sup>13</sup>C{<sup>1</sup>H} NMR (100 MHz, CDCl<sub>3</sub>): δ 141.2, 133.3, 129.4, 126.8 (aryl *C*), 71.8, 60.9 (cage *C*), 23.0 (*CH*<sub>3</sub>). <sup>11</sup>B{<sup>1</sup>H} NMR (128 MHz, CDCl<sub>3</sub>): δ -4.0 (1B), -5.0 (2B) (*BN* and *BH*), -8.9 (1B), -10.2 (3B), -13.0 (2B), -14.0 (1B). HRMS: *m/z* calcd for C<sub>9</sub>H<sub>18</sub><sup>10</sup>B<sub>2</sub><sup>11</sup>B<sub>8</sub>NO<sub>2</sub>S<sup>-</sup> [*M*-H]<sup>-</sup>: 312.2072. Found: 312.2068.

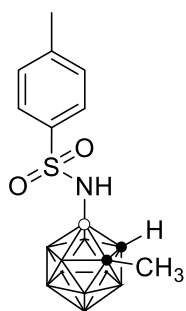

**2c:** Yield 81% (26.5 mg). Colorless crystals. <sup>1</sup>H NMR (400 MHz, CDCl<sub>3</sub>): 7.81 (d, *J* = 8.4 Hz, 2H), 7.35 (d, *J* = 8.4 Hz, 2H) (aryl *CH*), 5.31 (s, 1H) (*NH*), 4.24 (s, 1H) (cage *CH*), 2.46 (s, 3H), 2.10 (s, 3H) (*CH*<sub>3</sub>). <sup>13</sup>C{<sup>1</sup>H} NMR (125 MHz, CDCl<sub>3</sub>): δ 144.2, 138.3, 130.0, 126.8 (aryl *C*), 71.8, 60.8 (cage *C*), 23.0, 21.8 (*CH*<sub>3</sub>). <sup>11</sup>B{<sup>1</sup>H} NMR (128 MHz, CDCl<sub>3</sub>): δ -5.3 (1B), -6.2 (2B) (*BN* and *BH*), -10.2 (1B), -11.6 (3B), -14.4 (2B), -15.2 (1B). HRMS: *m/z* calcd for C<sub>10</sub>H<sub>20</sub><sup>10</sup>B<sub>2</sub><sup>11</sup>B<sub>8</sub>NO<sub>2</sub>S<sup>-</sup> [*M*-H]<sup>-</sup>: 326.2229. Found: 326.2223.

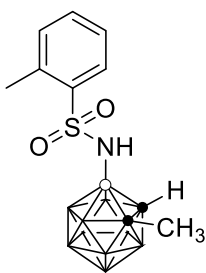

**3c:** Yield 67% (22.0 mg). White solid.  $^1\text{H}$  NMR (400 MHz,  $\text{CDCl}_3$ ): 7.99 (d,  $J = 7.6$  Hz, 1H), 7.51 (m, 1H), 7.36 (m, 2H) (aryl CH), 5.69 (s, 1H) (NH), 4.15 (s, 1H) (cage CH), 2.74 (s, 3H), 2.09 (s, 3H), ( $\text{CH}_3$ ).  $^{13}\text{C}\{^1\text{H}\}$  NMR (100 MHz,  $\text{CDCl}_3$ ):  $\delta$  139.1, 136.7, 133.4, 132.8, 128.7, 126.5 (aryl C), 61.8, 60.8 (cage C), 22.9, 20.3 ( $\text{CH}_3$ ).  $^{11}\text{B}\{^1\text{H}\}$  NMR (128 MHz,  $\text{CDCl}_3$ ):  $\delta$  -5.3 (1B), -6.4 (2B) (BN and BH), -10.2 (1B), -12.1 (3B), -14.7 (3B). HRMS:  $m/z$  calcd for  $\text{C}_{10}\text{H}_{20}^{10}\text{B}_2^{11}\text{B}_8\text{NO}_2\text{S}^-$  [M-H] $^-$ : 326.2229. Found: 326.2224.

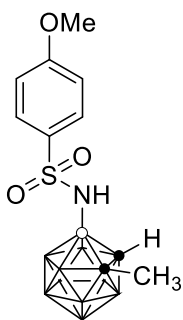

**4c:** Yield 82% (28.0 mg). White solid.  $^1\text{H}$  NMR (400 MHz,  $\text{CDCl}_3$ ): 7.86 (d,  $J = 8.8$  Hz, 2H), 7.01 (d,  $J = 8.8$  Hz, 2H) (aryl CH), 5.39 (s, 1H) (NH), 4.22 (s, 1H) (cage CH), 3.90 (s, 3H) ( $\text{OCH}_3$ ), 2.09 (s, 3H) ( $\text{CH}_3$ ).  $^{13}\text{C}\{^1\text{H}\}$  NMR (100 MHz,  $\text{CDCl}_3$ ):  $\delta$  163.3, 132.8, 129.0, 114.5 (aryl C), 71.8, 60.8 (cage C), 55.8 ( $\text{OCH}_3$ ), 23.0 ( $\text{CH}_3$ ).  $^{11}\text{B}\{^1\text{H}\}$  NMR (128 MHz,  $\text{CDCl}_3$ ):  $\delta$  -5.7 (1B), -6.5 (2B) (BN and BH), -10.4 (1B), -12.5 (3B), -14.6 (2B), -15.6 (1B). HRMS:  $m/z$  calcd for  $\text{C}_{10}\text{H}_{20}^{10}\text{B}_2^{11}\text{B}_8\text{NO}_3\text{S}^-$  [M-H] $^-$ : 342.2178. Found: 342.2173.

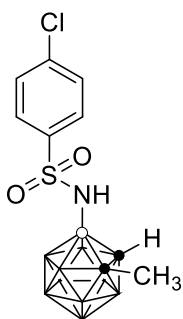

**5c:** Yield 48% (16.5 mg). White solid.  $^1\text{H}$  NMR (400 MHz,  $\text{CDCl}_3$ ): 7.88 (d,  $J = 8.8$  Hz, 2H), 7.54 (d,  $J = 8.8$  Hz, 2H) (aryl CH), 5.71 (s, 1H) (NH), 4.17 (s, 1H) (cage CH), 2.08 (s, 3H) ( $\text{CH}_3$ ).  $^{13}\text{C}\{^1\text{H}\}$  NMR (100 MHz,  $\text{CDCl}_3$ ):  $\delta$  139.9, 139.6, 129.7, 128.3 (aryl C), 71.7, 61.0 (cage C), 23.0 ( $\text{CH}_3$ ).  $^{11}\text{B}\{^1\text{H}\}$  NMR (128 MHz,  $\text{CDCl}_3$ ):  $\delta$  -5.7 (1B), -6.5 (2B) (BN and BH), -10.4 (1B), -12.5 (3B), -14.6 (2B), -15.6 (1B). HRMS:  $m/z$  calcd for  $\text{C}_9\text{H}_{17}^{10}\text{B}_2^{11}\text{B}_8\text{ClNO}_2\text{S}^-$  [M-H] $^-$ : 346.1686. Found: 346.1678.

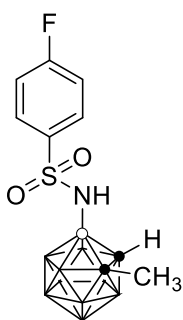

**6c:** Yield 58% (19.2 mg). White solid.  $^1\text{H}$  NMR (400 MHz,  $\text{CDCl}_3$ ): 7.96 (m, 2H), 7.25 (m, 2H) (aryl CH), 5.53 (s, 1H) (NH), 4.19 (s, 1H) (cage H), 2.09 (s, 3H) ( $\text{CH}_3$ ).  $^{13}\text{C}\{^1\text{H}\}$  NMR (100 MHz,  $\text{CDCl}_3$ ): 165.4 (d,  $^1J_{\text{C-F}} = 255$  Hz), 137.2 (d,  $^4J_{\text{C-F}} = 3$  Hz), 129.6 (d,  $^3J_{\text{C-F}} = 9$  Hz), 116.7 (d,  $^2J_{\text{C-F}} = 22$  Hz), 71.9, 61.0 (cage C), 23.0 ( $\text{CH}_3$ ).  $^{11}\text{B}\{^1\text{H}\}$  NMR (128 MHz,  $\text{CDCl}_3$ ):  $\delta$  -5.3 (1B), -6.5 (2B) (BN and BH), -10.3 (1B), -11.6 (3B), -14.2 (1B), -15.3 (2B). HRMS:  $m/z$  calcd for  $\text{C}_9\text{H}_{17}^{10}\text{B}_2^{11}\text{B}_8\text{FNO}_2\text{S}^-$  [M-H] $^-$ : 330.1978. Found: 330.1975.

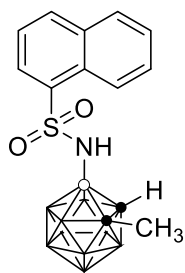

**7c:** Yield 44% (16.0 mg). White solid.  $^1\text{H}$  NMR (400 MHz,  $\text{CDCl}_3$ ): 8.49 (d,  $J = 8.8$  Hz, 1H), 7.94 (m, 4H), 7.66 (m, 2H) (aryl  $\text{CH}$ ), 5.69 (s, 1H) ( $\text{NH}$ ), 4.27 (s, 1H) (cage  $\text{CH}$ ), 2.11 (s, 3H) ( $\text{CH}_3$ ).  $^{13}\text{C}\{^1\text{H}\}$  NMR (100 MHz,  $\text{CDCl}_3$ ):  $\delta$  138.0, 135.1, 132.2, 129.9, 129.5, 129.3, 128.2, 128.2, 127.9, 121.8 (aryl C), 71.8, 60.9 (cage C), 23.0 ( $\text{CH}_3$ ).  $^{11}\text{B}\{^1\text{H}\}$  NMR (128 MHz,  $\text{CDCl}_3$ ):  $\delta$  -5.3 (1B), -6.3 (2B) ( $\text{BN}$  and  $\text{BH}$ ), -10.2 (1B), -11.6 (3B), -14.3 (3B). HRMS:  $m/z$  calcd for  $\text{C}_{13}\text{H}_{21}^{10}\text{B}_2^{11}\text{B}_8\text{NO}_2\text{SNa}^+ [\text{M}+\text{Na}]^+$ : 386.2196. Found: 386.2189.

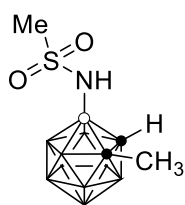

**8c:** Yield 60% (15.0 mg). White solid.  $^1\text{H}$  NMR (400 MHz,  $\text{CDCl}_3$ ): 5.19 (s, 1H) ( $\text{NH}$ ), 4.21 (s, 1H) (cage  $\text{CH}$ ), 2.23 (s, 3H), 2.04 (s, 3H) ( $\text{CH}_3$ ).  $^{13}\text{C}\{^1\text{H}\}$  NMR (100 MHz,  $\text{CDCl}_3$ ):  $\delta$  71.7, 61.1 (cage C), 42.9, 22.9 ( $\text{CH}_3$ ).  $^{11}\text{B}\{^1\text{H}\}$  NMR (128 MHz,  $\text{CDCl}_3$ ):  $\delta$  -4.5 (1B), -5.7 (2B) ( $\text{BN}$  and  $\text{BH}$ ), -9.4 (1B), -10.8 (2B), -11.7 (1B), -14.0 (3B). HRMS:  $m/z$  calcd for  $\text{C}_4\text{H}_{16}^{10}\text{B}_2^{11}\text{B}_8\text{NO}_2\text{S}^- [\text{M}-\text{H}]^-$ : 250.1913. Found: 250.1911.

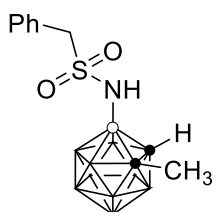

**9c:** Yield 69% (22.5 mg). White solid.  $^1\text{H}$  NMR (400 MHz,  $\text{CDCl}_3$ ): 7.50 (m, 2H), 7.45 (m, 3H) (aryl  $\text{CH}$ ), 4.97 (s, 1H) ( $\text{NH}$ ), 4.41 (m, 2H) ( $\text{CH}_2$ ), 4.29 (s, 1H) (cage  $\text{CH}$ ), 1.99 (s, 3H) ( $\text{CH}_3$ ).  $^{13}\text{C}\{^1\text{H}\}$  NMR (100 MHz,  $\text{CDCl}_3$ ):  $\delta$  131.2, 129.3, 129.2, 128.8 (aryl C), 71.8, 61.0 (cage C), 60.4 ( $\text{CH}_2$ ), 22.8 ( $\text{CH}_3$ ).  $^{11}\text{B}\{^1\text{H}\}$  NMR (128 MHz,  $\text{CDCl}_3$ ):  $\delta$  -5.5 (1B), -6.4 (2B) ( $\text{BN}$  and  $\text{BH}$ ), -10.2 (1B), -11.6 (3B), -14.4 (3B). HRMS:  $m/z$  calcd for  $\text{C}_{10}\text{H}_{20}^{10}\text{B}_2^{11}\text{B}_8\text{NO}_2\text{S}^- [\text{M}-\text{H}]^-$ : 326.2229. Found: 326.2223.

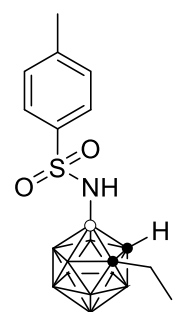

**10c:** Yield 82% (28.0 mg). White solid.  $^1\text{H}$  NMR (400 MHz,  $\text{CDCl}_3$ ): 7.81 (d,  $J = 8.0$  Hz, 2H), 7.35 (d,  $J = 8.0$  Hz, 2H) (aryl  $\text{CH}$ ), 5.51 (s, 1H) ( $\text{NH}$ ), 4.20 (s, 1H) (cage  $\text{CH}$ ), 2.49 (m, 4H), 2.29 (m, 1H) ( $\text{CH}_3$  and  $\text{CH}_2$ ), 1.14 (t,  $J = 7.6$  Hz, 3H) ( $\text{CH}_3$ ).  $^{13}\text{C}\{^1\text{H}\}$  NMR (100 MHz,  $\text{CDCl}_3$ ):  $\delta$  144.2, 138.3, 130.0, 126.8 (aryl C), 60.1 (cage C), 28.4, 21.8, 13.2 ( $\text{CH}_3$  and  $\text{CH}_2$ ).  $^{11}\text{B}\{^1\text{H}\}$  NMR (128 MHz,  $\text{CDCl}_3$ ):  $\delta$  -6.0 (3B) ( $\text{BN}$  and  $\text{BH}$ ), -10.3 (1B), -13.4 (3B), -14.6 (3B). HRMS:  $m/z$  calcd for  $\text{C}_{11}\text{H}_{22}^{10}\text{B}_2^{11}\text{B}_8\text{NO}_2\text{S}^- [\text{M}-\text{H}]^-$ : 340.2386. Found: 340.2380.

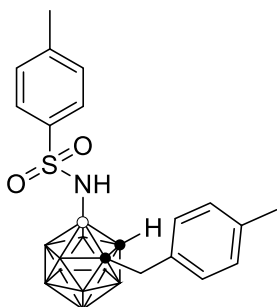

**11c:** Yield 70% (29.0 mg). Colorless crystals.  $^1\text{H}$  NMR (400 MHz,  $\text{CDCl}_3$ ): 7.86 (d,  $J = 8.4$  Hz, 2H), 7.35 (d,  $J = 8.0$  Hz, 2H), 7.13 (m, 4H) (aryl CH), 5.68 (s, 1H) (NH), 4.14 (s, 1H) (cage CH), 3.57 (m, 2H) ( $\text{CH}_2$ ), 2.45 (s, 3H), 2.34 (s, 3H) ( $\text{CH}_3$ ).  $^{13}\text{C}\{^1\text{H}\}$  NMR (100 MHz,  $\text{CDCl}_3$ ):  $\delta$  144.2, 138.3, 138.1, 131.8, 130.3, 130.0, 129.6, 126.8 (aryl C), 76.3, 59.1 (cage CH), 40.0, 21.7, 21.3 ( $\text{CH}_3$  and  $\text{CH}_2$ ).  $^{11}\text{B}\{^1\text{H}\}$  NMR (128 MHz,  $\text{CDCl}_3$ ):  $\delta$  -5.3 (3B) (BN and BH), -10.1 (1B), -13.1 (2B), -14.6 (4B). HRMS:  $m/z$  calcd for  $\text{C}_{17}\text{H}_{27}^{10}\text{B}_2^{11}\text{B}_8\text{NO}_2\text{SNa}^+$  [ $\text{M}+\text{Na}$ ] $^+$ : 440.2667. Found: 440.2664.

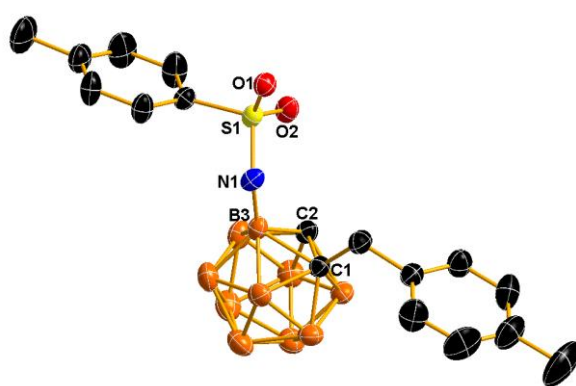

**Figure S1.** Molecular Structure of **11c**

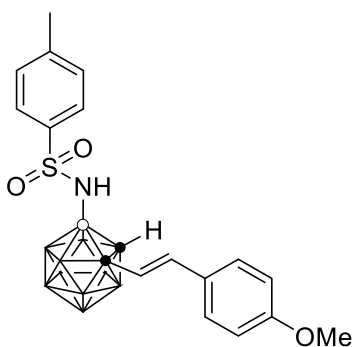

**12c:** Yield 57% (25.5 mg). Colorless crystals.  $^1\text{H}$  NMR (400 MHz,  $\text{CDCl}_3$ ): 7.79 (d,  $J = 8.0$  Hz, 2H), 7.30 (m, 4H), 6.87 (d,  $J = 8.4$  Hz, 2H), 6.81 (d,  $J = 16.0$  Hz, 1H), 6.19 (d,  $J = 16.0$  Hz, 1H) (aryl CH and alkenyl CH), 5.40 (s, 1H) (NH), 4.35 (s, 1H) (cage CH), 3.83 (s, 3H) ( $\text{OCH}_3$ ), 2.43 (s, 3H) ( $\text{CH}_3$ ).  $^{13}\text{C}\{^1\text{H}\}$  NMR (100 MHz,  $\text{CDCl}_3$ ):  $\delta$  160.8, 144.0, 138.4, 138.1, 129.9, 128.7, 127.1, 126.8, 117.1, 114.4 (aryl C), 75.7, 60.0 (cage C), 55.5 ( $\text{OCH}_3$ ), 21.7 ( $\text{CH}_3$ ).  $^{11}\text{B}\{^1\text{H}\}$  NMR (128 MHz,  $\text{CDCl}_3$ ):  $\delta$  -5.6 (3B) (BN and BH), -12.2 (4B), -14.3 (3B). HRMS:  $m/z$  calcd for  $\text{C}_{18}\text{H}_{27}^{10}\text{B}_2^{11}\text{B}_8\text{NO}_3\text{SNa}^+$  [ $\text{M}+\text{Na}$ ] $^+$ : 468.2617. Found: 468.2608.

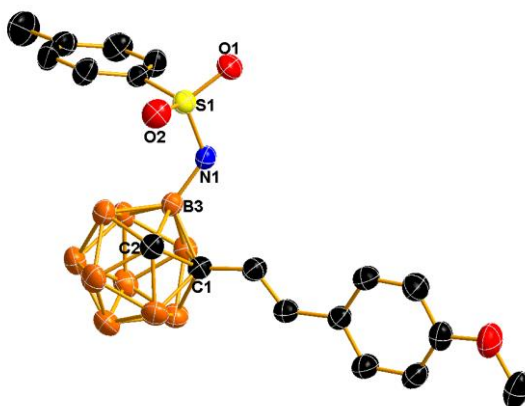

**Figure S2.** Molecular Structure of **12c**

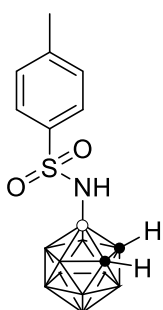

**13c:** Yield 45% (14.0 mg). White solid.  $^1\text{H}$  NMR (400 MHz,  $\text{CDCl}_3$ ): 7.78 (d,  $J = 7.6$  Hz, 2H), 7.35 (d,  $J = 8.0$  Hz, 2H) (aryl CH), 5.36 (s, 1H) (NH), 4.09 (s, 2H) (cage CH), 2.46 (s, 3H) ( $\text{CH}_3$ ).  $^{13}\text{C}\{^1\text{H}\}$  NMR (100 MHz,  $\text{CDCl}_3$ ):  $\delta$  144.3, 138.2, 130.1, 126.6 (aryl C), 56.5 (cage C), 21.7 ( $\text{CH}_3$  and  $\text{CH}_2$ ).  $^{11}\text{B}\{^1\text{H}\}$  NMR (128 MHz,  $\text{CDCl}_3$ ):  $\delta$  -3.9 (2B), -6.9 (1B) (BN), -10.4 (1B), -14.5 (6B). HRMS:  $m/z$  calcd for  $\text{C}_9\text{H}_{18}^{10}\text{B}_2^{11}\text{B}_8\text{NO}_2\text{S}^-$  [ $\text{M}-\text{H}$ ] $^-$ : 312.2072. Found: 312.2067.

#### Preparation of B(4)-arylamino-*o*-carboranes (**d**).

**A representative procedure.** 1-COOH-*o*-carborane **a** (0.10 mmol), aniline (1.2 equiv, 0.12 mmol),  $[\text{Cp}^*\text{IrCl}_2]_2$  (2.4 mg, 3 mol %, 0.003 mmol), AgOAc (16.7 mg, 10 mol%, 0.01 mmol), AgNTf<sub>2</sub> (3.9 mg, 10 mol%, 0.01 mmol),  $\text{Cu}(\text{OAc})_2$  (54.5 mg, 3.0 equiv, 0.30 mmol) and  $\text{Li}_2\text{CO}_3$  (14.8 mg, 2.0 equiv, 0.20 mmol) were mixed in dry toluene (2 mL). The resulting mixture was heated in a closed flask at 120 °C or 140 °C for 12 h under argon. Then, the reaction solution was filtered through a pad of Celite and washed with diethyl ether. The organic portions were combined. After removal of organic solvents under reduced pressure, the residue was subjected to flash column chromatography on silica gel (230-400 mesh) using a mixture of *n*-hexane and ethyl acetate (20/1 in v/v) as eluent to give the product **d**.

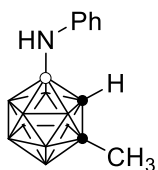

**1d:** Yield 92% (23.0 mg). Colorless oil.  $^1\text{H}$  NMR (400 MHz,  $\text{CDCl}_3$ ):  $\delta$  7.19 (t,  $J = 8.4$  Hz, 2H), 6.96 (d,  $J = 7.6$  Hz, 2H), 6.80 (t,  $J = 7.6$  Hz, 1H) (aryl  $\text{CH}$ ), 3.74 (s, 1H) (cage  $\text{CH}$ ), 2.03 (s, 3H) ( $\text{CH}_3$ ).  $^{13}\text{C}\{^1\text{H}\}$  NMR (100 MHz,  $\text{CDCl}_3$ ):  $\delta$  146.7, 129.3, 119.1, 116.2 (aryl C), 68.2, 63.4 (cage C), 25.9 ( $\text{CH}_3$ ).  $^{11}\text{B}\{^1\text{H}\}$  NMR (128 MHz,  $\text{CDCl}_3$ ):  $\delta$  -0.8 (1B) (BN), -2.3 (1B), -7.1 (1B), -10.8 (1B), -12.5 (2B), -13.4 (3B), -17.8 (1B). HRMS:  $m/z$  calcd for  $\text{C}_9\text{H}_{20}^{10}\text{B}_2^{11}\text{B}_8\text{N}^+$   $[\text{M}+\text{H}]^+$ : 250.2593. Found: 250.2590.

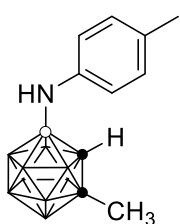

**2d:** Yield 81% (21.3 mg). Colorless oil.  $^1\text{H}$  NMR (400 MHz,  $\text{CDCl}_3$ ):  $\delta$  7.99 (d,  $J = 8.0$  Hz, 2H), 6.85 (d,  $J = 8.0$  Hz, 2H) (aryl  $\text{CH}$ ), 3.83 (s, 1H) (NH), 3.70 (s, 1H) (cage  $\text{CH}$ ), 2.25 (s, 3H), 2.03 (s, 3H) ( $\text{CH}_3$ ).  $^{13}\text{C}\{^1\text{H}\}$  NMR (100 MHz,  $\text{CDCl}_3$ ):  $\delta$  144.4, 129.7, 128.2, 116.2 (aryl C), 68.1, 63.4 (cage C), 26.0, 20.6 ( $\text{CH}_3$ ).  $^{11}\text{B}\{^1\text{H}\}$  NMR (128 MHz,  $\text{CDCl}_3$ ):  $\delta$  -0.2 (1B) (BN), -2.8 (1B), -6.9 (1B), -10.6 (1B), -12.4 (2B), -13.3 (3B), -17.9 (1B). HRMS:  $m/z$  calcd for  $\text{C}_{10}\text{H}_{22}^{10}\text{B}_2^{11}\text{B}_8\text{N}^+$   $[\text{M}+\text{H}]^+$ : 264.2750. Found: 264.2747.

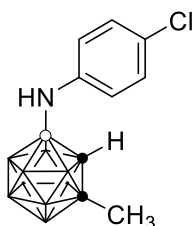

**3d:** Yield 93% (26.3 mg). Colorless oil.  $^1\text{H}$  NMR (400 MHz,  $\text{CDCl}_3$ ):  $\delta$  7.12 (d,  $J = 8.4$  Hz, 2H), 6.89 (d,  $J = 8.8$  Hz, 2H) (aryl  $\text{CH}$ ), 3.82 (s, 1H) (cage  $\text{CH}$ ), 2.04 (s, 3H) ( $\text{CH}_3$ ).  $^{13}\text{C}\{^1\text{H}\}$  NMR (100 MHz,  $\text{CDCl}_3$ ):  $\delta$  144.7, 129.1, 124.3, 117.8 (aryl C), 68.6, 63.3 (cage C), 26.0 ( $\text{CH}_3$ ).  $^{11}\text{B}\{^1\text{H}\}$  NMR (128 MHz,  $\text{CDCl}_3$ ):  $\delta$  -1.2 (1B) (BN), -2.8 (1B), -7.3 (1B), -10.8 (1B), -13.2 (5B), -17.6 (1B). HRMS:  $m/z$  calcd for  $\text{C}_9\text{H}_{19}^{10}\text{B}_2^{11}\text{B}_8\text{ClN}^+$   $[\text{M}+\text{H}]^+$ : 284.2204. Found: 284.2201.

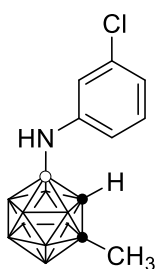

**4d:** Yield 92% (26.0 mg). Colorless oil.  $^1\text{H}$  NMR (400 MHz,  $\text{CDCl}_3$ ):  $\delta$  7.08 (t,  $J = 8.0$  Hz, 1H), 6.93 (s, 1H), 6.81 (d,  $J = 8.0$  Hz, 1H), 6.74 (d,  $J = 7.6$  Hz, 1H) (aryl  $\text{CH}$ ), 3.98 (s, 1H) (NH), 3.73 (s, 1H) (cage  $\text{CH}$ ), 2.04 (s, 3H) ( $\text{CH}_3$ ).  $^{13}\text{C}\{^1\text{H}\}$  NMR (100 MHz,  $\text{CDCl}_3$ ):  $\delta$  148.2, 134.8, 130.2, 118.9, 115.9, 114.3 (aryl C), 68.4, 63.4 (cage C), 26.0 ( $\text{CH}_3$ ).  $^{11}\text{B}\{^1\text{H}\}$  NMR (128 MHz,  $\text{CDCl}_3$ ):  $\delta$  -1.1 (1B) (BN), -2.8 (1B), -7.1 (1B), -10.8 (1B), -12.3 (1B), -13.2 (4B), -17.6 (1B). HRMS:  $m/z$  calcd for  $\text{C}_9\text{H}_{19}^{10}\text{B}_2^{11}\text{B}_8\text{ClN}^+$   $[\text{M}+\text{H}]^+$ : 284.2204. Found: 284.2203.

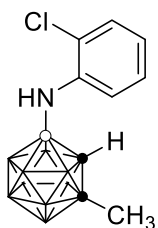

**5d:** Yield 83% (23.5 mg). Colorless oil.  $^1\text{H}$  NMR (400 MHz,  $\text{CDCl}_3$ ):  $\delta$  7.43 (m, 1H), 7.26 (m, 1H), 7.13 (m, 1H), 6.71 (m, 1H) (aryl *CH*), 4.63 (s, 1H) (*NH*), 3.77 (s, 1H) (cage *CH*), 2.05 (s, 3H) ( $\text{CH}_3$ ).  $^{13}\text{C}\{^1\text{H}\}$  NMR (100 MHz,  $\text{CDCl}_3$ ):  $\delta$  143.3, 129.3, 127.6, 121.1, 119.2, 115.4 (aryl *C*), 68.4, 63.7 (cage *C*), 26.0 ( $\text{CH}_3$ ).  $^{11}\text{B}\{^1\text{H}\}$  NMR (128 MHz,  $\text{CDCl}_3$ ):  $\delta$  -0.7 (1B) (*BN*), -2.4 (1B), -6.8 (1B), -10.3 (1B), -12.8 (5B), -17.1 (1B). HRMS:  $m/z$  calcd for  $\text{C}_9\text{H}_{19}^{10}\text{B}_2^{11}\text{B}_8\text{ClN}^+$  [ $\text{M}+\text{H}$ ] $^+$ : 284.2204. Found: 284.2200.

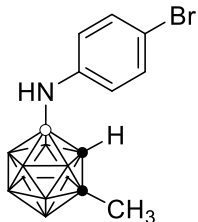

**6d:** Yield 91% (30.0 mg). Colorless oil.  $^1\text{H}$  NMR (400 MHz,  $\text{CDCl}_3$ ):  $\delta$  7.24 (d,  $J = 8.8$  Hz, 2H), 6.82 (d,  $J = 8.8$  Hz, 2H) (aryl *CH*), 3.94 (s, 1H) (*NH*), 3.73 (s, 1H) (cage *CH*), 2.04 (s, 3H) ( $\text{CH}_3$ ).  $^{13}\text{C}\{^1\text{H}\}$  NMR (100 MHz,  $\text{CDCl}_3$ ):  $\delta$  146.1, 131.9, 117.7, 110.6 (aryl *C*), 68.4, 63.4 (cage *C*), 26.0 ( $\text{CH}_3$ ).  $^{11}\text{B}\{^1\text{H}\}$  NMR (128 MHz,  $\text{CDCl}_3$ ):  $\delta$  -1.0 (1B) (*BN*), -2.8 (1B), -7.2 (1B), -10.9 (1B), -13.2 (5B), -17.7 (1B). HRMS:  $m/z$  calcd for  $\text{C}_9\text{H}_{19}^{10}\text{B}_2^{11}\text{B}_8\text{BrN}^+$  [ $\text{M}+\text{H}$ ] $^+$ : 330.1680. Found: 330.1678.

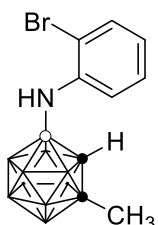

**7d:** Yield 63% (20.7 mg). Colorless oil.  $^1\text{H}$  NMR (400 MHz,  $\text{CDCl}_3$ ):  $\delta$  7.43 (m, 2H), 7.17 (m, 1H), 6.65 (m, 1H) (aryl *CH*), 4.63 (s, 1H) (*NH*), 3.79 (s, 1H) (cage *CH*), 2.05 (s, 3H) ( $\text{CH}_3$ ).  $^{13}\text{C}\{^1\text{H}\}$  NMR (100 MHz,  $\text{CDCl}_3$ ):  $\delta$  144.4, 132.6, 128.3, 119.8, 115.6, 112.5 (aryl *C*), 68.4, 63.7 (cage *C*), 26.0 ( $\text{CH}_3$ ).  $^{11}\text{B}\{^1\text{H}\}$  NMR (128 MHz,  $\text{CDCl}_3$ ):  $\delta$  -1.0 (1B) (*BN*), -2.7 (1B), -7.2 (1B), -10.7 (1B), -12.2 (2B), -13.0 (3B), -17.5 (1B). HRMS:  $m/z$  calcd for  $\text{C}_9\text{H}_{18}^{10}\text{B}_2^{11}\text{B}_8\text{BrN}^+$  [ $\text{M}$ ] $^+$ : 328.1611. Found: 328.1617.

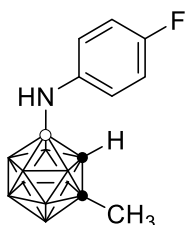

**8d:** Yield 90% (33.0 mg). Colorless oil.  $^1\text{H}$  NMR (400 MHz,  $\text{CDCl}_3$ ):  $\delta$  6.87 (m, 4H) (aryl *CH*), 3.84 (s, 1H) (*NH*), 3.72 (s, 1H) (cage *CH*), 2.04 (s, 3H) ( $\text{CH}_3$ ).  $^{13}\text{C}\{^1\text{H}\}$  NMR (100 MHz,  $\text{CDCl}_3$ ):  $\delta$  156.5 (d,  $^1J_{\text{C-F}} = 235$  Hz), 143.0, 117.1 (d,  $^3J_{\text{C-F}} = 8$  Hz), 115.6 (d,  $^2J_{\text{C-F}} = 22$  Hz) (aryl *C*), 68.3, 63.4 (cage *C*), 26.0 ( $\text{CH}_3$ ).  $^{11}\text{B}\{^1\text{H}\}$  NMR (128 MHz,  $\text{CDCl}_3$ ):  $\delta$  7.4 (1B) (*BN*), 5.1 (1B), 0.8 (1B), -3.0 (1B), -5.4 (5B), -10.0 (1B).  $^{19}\text{F}$  NMR (376 MHz,  $\text{CDCl}_3$ ):  $\delta$  -125.8 (m, 1F). HRMS:  $m/z$  calcd for  $\text{C}_9\text{H}_{19}^{10}\text{B}_2^{11}\text{B}_8\text{FN}^+$  [ $\text{M}+\text{H}$ ] $^+$ : 268.2499. Found: 268.2496.



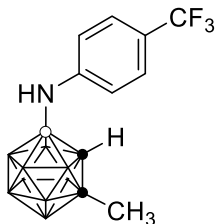

**9d:** Yield 90% (28.5 mg). Colorless oil.  $^1\text{H}$  NMR (400 MHz,  $\text{CDCl}_3$ ):  $\delta$  7.41 (d,  $J = 8.8$  Hz, 2H), 6.98 (d,  $J = 8.4$  Hz, 2H) (aryl CH), 4.20 (s, 1H) (NH), 3.76 (s, 1H) (cage CH), 2.05 (s, 3H) ( $\text{CH}_3$ ).  $^{13}\text{C}\{^1\text{H}\}$  NMR (100 MHz,  $\text{CDCl}_3$ ):  $\delta$  150.0, 126.6 (q,  $^3J_{\text{C-F}} = 4$  Hz) (aryl C), 124.9 (q,  $^1J_{\text{C-F}} = 269$  Hz) ( $\text{CF}_3$ ), 120.6 (q,  $^2J_{\text{C-F}} = 33$  Hz), 115.4 (aryl C), 68.5, 63.4 (cage C), 26.0 ( $\text{CH}_3$ ).  $^{11}\text{B}\{^1\text{H}\}$  NMR (128 MHz,  $\text{CDCl}_3$ ):  $\delta$  -1.2 (1B) (BN), -2.5 (1B), -7.0 (1B), -10.6 (1B), -12.9 (5B), -17.2 (1B).  $^{19}\text{F}$  NMR (376 MHz,  $\text{CDCl}_3$ ):  $\delta$  -61.0 (m, 3F). HRMS:  $m/z$  calcd for  $\text{C}_{10}\text{H}_{18}^{10}\text{B}_2^{11}\text{B}_8\text{F}_2\text{N}^+$  [M-F] $^+$ : 298.2405. Found: 298.2400.

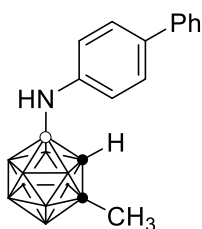

**10d:** Yield 92% (30.0 mg). Colorless crystals.  $^1\text{H}$  NMR (400 MHz,  $\text{CDCl}_3$ ):  $\delta$  7.56 (d,  $J = 7.2$  Hz, 2H), 7.44 (m, 4H), 7.29 (t,  $J = 7.2$  Hz, 1H), 7.03 (d,  $J = 8.4$  Hz, 2H) (aryl CH), 4.03 (s, 1H) (NH), 3.71 (s, 1H) (cage CH), 2.03 (s, 3H) ( $\text{CH}_3$ ).  $^{13}\text{C}\{^1\text{H}\}$  NMR (100 MHz,  $\text{CDCl}_3$ ):  $\delta$  146.4, 141.1, 131.8, 128.8, 127.9, 126.5, 126.4, 116.3 (aryl C), 68.2, 63.4 (cage C), 25.9 ( $\text{CH}_3$ ).  $^{11}\text{B}\{^1\text{H}\}$  NMR (128 MHz,  $\text{CDCl}_3$ ):  $\delta$  -0.8 (1B) (BN), -2.8 (1B), -7.0 (1B), -10.7 (1B), -13.3 (5B), -17.8 (1B). HRMS:  $m/z$  calcd for  $\text{C}_{15}\text{H}_{24}^{10}\text{B}_2^{11}\text{B}_8\text{N}^+$  [M+H] $^+$ : 326.2907. Found: 326.2902.

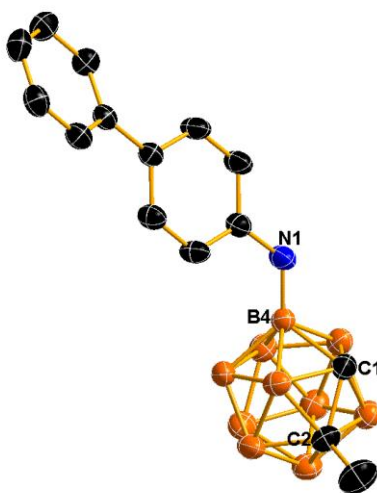

**Figure S3.** Molecular Structure of **10d**

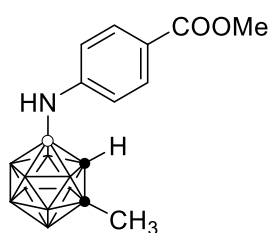

**11d:** Yield 94% (29.0 mg). Colorless crystals.  $^1\text{H}$  NMR (400 MHz,  $\text{CDCl}_3$ ):  $\delta$  7.85 (d,  $J = 8.4$  Hz, 2H), 6.92 (d,  $J = 8.8$  Hz, 2H) (aryl CH), 4.03 (s, 1H) (NH), 3.85 (s, 1H) ( $\text{OCH}_3$ ), 3.79 (s, 1H) (cage CH), 2.04 (s, 3H) ( $\text{CH}_3$ ).  $^{13}\text{C}\{^1\text{H}\}$  NMR (100 MHz,  $\text{CDCl}_3$ ):  $\delta$  167.3 (carbonyl C), 151.5, 131.4, 120.2, 115.1 (aryl C), 68.5, 63.4 (cage C), 51.8 ( $\text{OCH}_3$ ), 25.9 ( $\text{CH}_3$ ).  $^{11}\text{B}\{^1\text{H}\}$  NMR (128 MHz,  $\text{CDCl}_3$ ):  $\delta$  -1.5 (1B) (BN), -2.7 (1B), -7.0 (1B), -10.7 (1B), -13.0 (5B), -17.3 (1B). HRMS:  $m/z$  calcd for  $\text{C}_{11}\text{H}_{21}^{10}\text{B}_2^{11}\text{B}_8\text{NO}_2\text{Na}^+$  [ $\text{M}+\text{Na}$ ] $^+$ : 330.2468. Found: 330.2464.

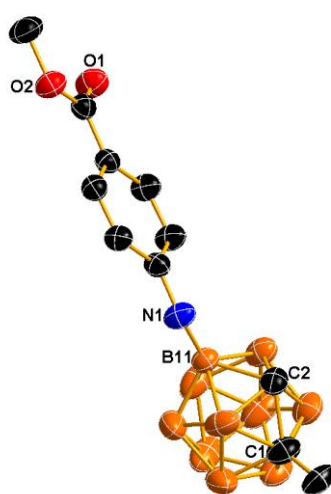

**Figure S4.** Molecular Structure of **11d**

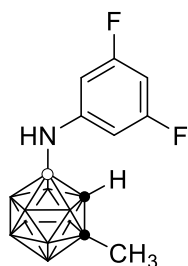

**12d:** Yield 95% (27.0 mg). Colorless oil.  $^1\text{H}$  NMR (400 MHz,  $\text{CDCl}_3$ ):  $\delta$  6.44 (m, 2H), 6.21 (m, 1H) (aryl CH), 4.10 (s, 1H) (NH), 3.75 (s, 1H) (cage CH), 2.05 (s, 3H) ( $\text{CH}_3$ ).  $^{13}\text{C}\{^1\text{H}\}$  NMR (100 MHz,  $\text{CDCl}_3$ ):  $\delta$  163.9 (dd,  $^3J_{\text{C-F}} = 16$  Hz,  $^1J_{\text{C-F}} = 243$  Hz), 149.5 (t,  $^3J_{\text{C-F}} = 13$  Hz), 98.9 (dd,  $^4J_{\text{C-F}} = 8$  Hz,  $^2J_{\text{C-F}} = 20$  Hz), 94.1 (t,  $^2J_{\text{C-F}} = 26$  Hz) (aryl C), 68.6, 63.3 (cage C), 26.0 ( $\text{CH}_3$ ).  $^{11}\text{B}\{^1\text{H}\}$  NMR (128 MHz,  $\text{CDCl}_3$ ):  $\delta$  1.8 (1B) (BN), 0.6 (1B), -3.8 (1B), -7.5 (1B), -8.7 (1B), -9.7 (4B), -14.0 (1B).  $^{19}\text{F}$  NMR (376 MHz,  $\text{CDCl}_3$ ):  $\delta$  -106.8 (m, 2F). HRMS:  $m/z$  calcd for  $\text{C}_9\text{H}_{18}^{10}\text{B}_2^{11}\text{B}_8\text{F}_2\text{N}^+$  [ $\text{M}+\text{H}$ ] $^+$ : 286.2405. Found: 286.2404.

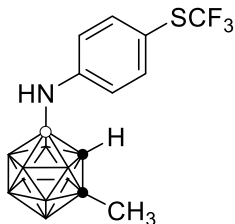

**13d:** Yield 89% (31.0 mg). Colorless oil.  $^1\text{H}$  NMR (400 MHz,  $\text{CDCl}_3$ ):  $\delta$  7.43 (d,  $J = 8.8$  Hz, 2H), 6.95 (d,  $J = 8.8$  Hz, 2H) (aryl CH), 4.19 (s, 1H) (NH), 3.76 (s, 1H) (cage CH), 2.05 (s, 3H) ( $\text{CH}_3$ ).  $^{13}\text{C}\{^1\text{H}\}$  NMR (125 MHz,  $\text{CDCl}_3$ ):  $\delta$  149.7, 138.1 (aryl C), 129.8 (q,  $^1J_{\text{C-F}} = 306$  Hz) ( $\text{CF}_3$ ), 116.5, 111.8 (aryl C), 68.5, 63.4 (cage C), 26.0 ( $\text{CH}_3$ ).  $^{11}\text{B}\{^1\text{H}\}$  NMR (128 MHz,  $\text{CDCl}_3$ ):  $\delta$  -1.4 (1B) (BN), -2.6 (1B), -7.0 (1B), -10.6 (1B), -12.0 (1B), -12.9 (4B), -17.3 (1B).  $^{19}\text{F}$  NMR (376 MHz,  $\text{CDCl}_3$ ):  $\delta$  -44.1 (m, 3F). HRMS:  $m/z$  calcd for  $\text{C}_{10}\text{H}_{19}^{10}\text{B}_2^{11}\text{B}_8\text{F}_3\text{NS}^+$  [ $\text{M}+\text{H}$ ] $^+$ : 350.2189. Found: 350.2183.

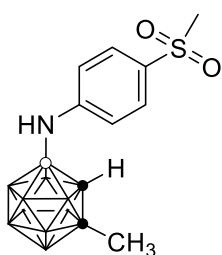

**14d:** Yield 67% (22.0 mg). White solid.  $^1\text{H}$  NMR (400 MHz,  $\text{CDCl}_3$ ):  $\delta$  7.64 (d,  $J = 8.4$  Hz, 2H), 6.98 (d,  $J = 8.8$  Hz, 2H) (aryl CH), 4.53 (s, 1H) (NH), 3.94 (s, 1H) (cage CH), 2.99 (s, 3H), 2.06 (s, 3H) ( $\text{CH}_3$ ).  $^{13}\text{C}\{^1\text{H}\}$  NMR (100 MHz,  $\text{CDCl}_3$ ):  $\delta$  152.3, 129.1, 129.0, 115.5 (aryl C), 68.8, 63.4 (cage C), 45.1, 25.9 ( $\text{CH}_3$ ).  $^{11}\text{B}\{^1\text{H}\}$  NMR (128 MHz,  $\text{CDCl}_3$ ):  $\delta$  -1.7 (1B) (BN), -2.6 (1B), -7.1 (1B), -10.6 (1B), -11.7 (1B), -12.7 (4B), -16.9 (1B). HRMS:  $m/z$  calcd for  $\text{C}_{10}\text{H}_{21}^{10}\text{B}_2^{11}\text{B}_8\text{NO}_2\text{SNa}^+$  [ $\text{M}+\text{Na}$ ] $^+$ : 350.2189. Found: 350.2185.

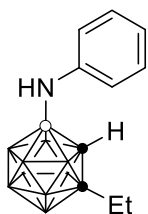

**15d:** Yield 87% (23.0 mg). Colorless oil.  $^1\text{H}$  NMR (400 MHz,  $\text{CDCl}_3$ ):  $\delta$  7.18 (t,  $J = 7.6$  Hz, 2H), 6.95 (d,  $J = 7.6$  Hz, 2H) (aryl CH), 6.78 (t,  $J = 7.2$  Hz, 1H), 3.94 (s, 1H) (NH), 3.71 (s, 1H) (cage CH), 2.29 (q,  $J = 7.6$  Hz, 2H), 1.10 (t,  $J = 7.6$  Hz, 3H) (Et).  $^{13}\text{C}\{^1\text{H}\}$  NMR (100 MHz,  $\text{CDCl}_3$ ):  $\delta$  146.9, 129.3, 118.8, 116.0 (aryl C), 74.0, 62.7 (cage C), 31.7, 13.6 (Et).  $^{11}\text{B}\{^1\text{H}\}$  NMR (128 MHz,  $\text{CDCl}_3$ ):  $\delta$  -0.9 (1B) (BN), -3.3 (1B), -6.1 (1B), -10.8 (1B), -12.4 (1B), -13.9 (4B), -18.5 (1B). HRMS:  $m/z$  calcd for  $\text{C}_{10}\text{H}_{22}^{10}\text{B}_2^{11}\text{B}_8\text{N}^+$  [ $\text{M}+\text{H}$ ] $^+$ : 264.2750. Found: 264.2748.

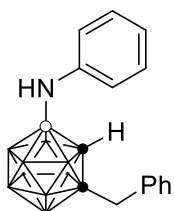

**16d:** Yield 91% (29.6 mg). Colorless oil.  $^1\text{H}$  NMR (400 MHz,  $\text{CDCl}_3$ ):  $\delta$  7.36 (m, 3H), 7.15 (m, 4H), 6.89 (d,  $J = 7.6$  Hz, 2H), 6.77 (t,  $J = 7.2$  Hz, 1H) (aryl CH), 3.86 (s, 1H) (NH), 3.53 (m, 2H) ( $\text{CH}_2$ ), 3.41 (s, 1H) (cage CH).  $^{13}\text{C}\{^1\text{H}\}$  NMR (100 MHz,  $\text{CDCl}_3$ ):  $\delta$  146.8, 134.4, 129.9, 129.3, 129.2, 128.7, 118.8, 115.8 (aryl C), 72.5, 61.1 (cage C), 43.6 ( $\text{CH}_2$ ).  $^{11}\text{B}\{^1\text{H}\}$  NMR (128 MHz,  $\text{CDCl}_3$ ):  $\delta$  -1.0 (1B)

(BN), -3.6 (1B), -6.1 (1B), -10.6 (1B), -12.2 (1B), -13.9 (4B), -17.9 (1B). HRMS:  $m/z$  calcd for  $C_{15}H_{24}^{10}B_2^{11}B_8N^+$   $[M+H]^+$ : 326.2907. Found: 326.2903.

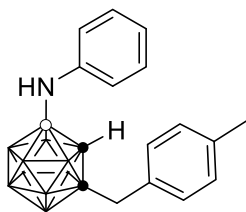

**17d:** Yield 94% (32.0 mg). Colorless oil.  $^1H$  NMR (400 MHz,  $CDCl_3$ ):  $\delta$  7.17 (m, 4H), 7.03 (d,  $J = 8.0$  Hz, 2H), 6.90 (d,  $J = 7.6$  Hz, 2H), 6.78 (t,  $J = 7.6$  Hz, 1H) (aryl CH), 3.87 (s, 1H) (NH), 3.50 (m, 2H) ( $CH_2$ ), 3.40 (s, 1H) (cage CH), 2.37 (s, 3H) ( $CH_3$ ).  $^{13}C\{^1H\}$  NMR (100 MHz,  $CDCl_3$ ):  $\delta$

146.9, 139.5, 131.3, 129.9, 129.7, 129.2, 118.7, 115.8 (aryl C), 72.7, 61.0 (cage C), 43.2 ( $CH_2$ ), 21.3 ( $CH_3$ ).  $^{11}B\{^1H\}$  NMR (128 MHz,  $CDCl_3$ ):  $\delta$  -1.1 (1B) (BN), -3.7 (1B), -6.1 (1B), -10.6 (1B), -12.2 (1B), -13.9 (4B), -17.9 (1B). HRMS:  $m/z$  calcd for  $C_{16}H_{26}^{10}B_2^{11}B_8N^+$   $[M+H]^+$ : 340.3063. Found: 340.3057.

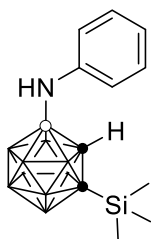

**18d:** Yield 49% (15.0 mg). Colorless oil.  $^1H$  NMR (400 MHz,  $CDCl_3$ ):  $\delta$  7.19 (t,  $J = 8.0$  Hz, 2H), 6.97 (d,  $J = 8.0$  Hz, 2H), 6.78 (t,  $J = 7.6$  Hz, 1H) (aryl CH), 3.98 (s, 1H) (NH), 3.52 (s, 1H) (cage CH), 0.25 (s, 9H) ( $CH_3$ ).  $^{13}C\{^1H\}$  NMR (100 MHz,  $CDCl_3$ ):  $\delta$  147.0, 129.3, 118.7, 115.9 (aryl C), 64.1, 61.7 (cage C), -1.3 ( $CH_3$ ).  $^{11}B\{^1H\}$  NMR (128 MHz,  $CDCl_3$ ):  $\delta$  -0.5 (2B) (BN and BH), -2.7 (1B), -

9.2 (1B), -10.2 (1B), -13.0 (1B), -14.1 (1B), -15.1 (2B), -18.4 (1B). HRMS:  $m/z$  calcd for  $C_{11}H_{26}^{10}B_2^{11}B_8NSi^+$   $[M+H]^+$ : 308.2833. Found: 308.2829.

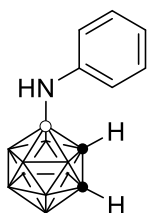

**19d:** Yield 26% (6.1 mg). Colorless oil.  $^1H$  NMR (400 MHz,  $CDCl_3$ ):  $\delta$  7.18 (t,  $J = 8.0$  Hz, 2H), 6.95 (d,  $J = 8.0$  Hz, 2H), 6.78 (t,  $J = 7.2$  Hz, 1H) (aryl CH), 3.94 (s, 1H) (NH), 3.72 (s, 1H), 3.56 (s, 1H) (cage CH).  $^{13}C\{^1H\}$  NMR (100 MHz,  $CDCl_3$ ):  $\delta$  146.8, 129.3, 119.0, 116.0 (aryl C), 56.1, 52.3 (cage C).  $^{11}B\{^1H\}$  NMR

(128 MHz,  $CDCl_3$ ):  $\delta$  -1.3 (1B) (BN), -2.6 (2B), -10.8 (1B), -12.3 (1B), -14.2 (1B), -16.3 (3B), -21.0 (1B). HRMS:  $m/z$  calcd for  $C_8H_{18}^{10}B_2^{11}B_8N^+$   $[M+H]^+$ : 236.2437. Found: 236.2436.

### Preparation of B(4)-alkylamino-*o*-carboranes (d).

**A representative procedure.** 1-COOH-2-Me-*o*-carborane **1a** (20.2 mg, 0.10 mmol), alkylamine **b** (1.1 equiv, 0.11 mmol),  $[Cp^*IrCl_2]_2$  (4.0 mg, 5 mol %, 0.005 mmol), AgOAc (50.1 mg, 3.0 equiv, 0.30 mmol), AgNTf<sub>2</sub> (38.8 mg, 1.0 equiv, 0.10 mmol) and Cu(OAc)<sub>2</sub> (9.1

mg, 0.5 equiv, 0.05 mmol) were mixed in 1,2-dichloroethane (2.0 mL). The resulting mixture was heated in a closed flask at 50 °C for 12 h under argon. Then, the reaction solution was filtered through a pad of Celite and washed with diethyl ether. The organic portions were combined. After removal of organic solvents under reduced pressure, the residue was subjected to flash column chromatography on silica gel (230-400 mesh) using a mixture of *n*-hexane and ethyl acetate (20/1 in v/v) as eluent to give the product **d**.

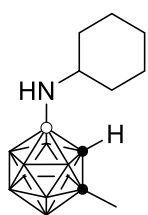

**20d**: Yield 78% (20.0 mg). Colorless oil.  $^1\text{H}$  NMR (400 MHz,  $\text{CDCl}_3$ ): 3.53 (s, 1H) (cage CH), 2.68 (m, 1H) (CH), 2.01 (s, 3H) ( $\text{CH}_3$ ), 1.89 (m, 2H), 1.67 (m, 2H), 1.55 (m, 1H), 1.25 (m, 3H), 1.11 (m, 1H), 0.98 (m, 1H) ( $\text{CH}_2$ ).  $^{13}\text{C}\{^1\text{H}\}$  NMR (100 MHz,  $\text{CDCl}_3$ ):  $\delta$  68.1, 63.1 (cage C), 56.0 (CH), 37.0, 37.0, 26.0, 25.9, 25.6 ( $\text{CH}_2$  and  $\text{CH}_3$ ).  $^{11}\text{B}\{^1\text{H}\}$  NMR (128 MHz,  $\text{CDCl}_3$ ):  $\delta$  3.0 (1B) (BN), -3.1 (1B), -7.3 (1B), -11.1 (1B), -13.3 (3B), -14.3 (2B), -19.6 (1B). HRMS:  $m/z$  calcd for  $\text{C}_9\text{H}_{25}^{10}\text{B}_2^{11}\text{B}_8\text{N}^+$   $[\text{M}]^+$ : 255.2985. Found: 255.2987.

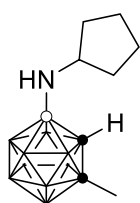

**21d**: Yield 71% (17.0 mg). Colorless oil.  $^1\text{H}$  NMR (400 MHz,  $\text{C}_6\text{D}_6$ ): 3.33 (m, 1H) (CH), 2.54 (s, 1H) (cage CH), 1.84 (m, 2H), 1.54 (m, 2H), 1.41 (m, 2H) ( $\text{CH}_2$ ), 1.21 (s, 3H) ( $\text{CH}_3$ ), 1.11 (m, 2H) ( $\text{CH}_2$ ).  $^{13}\text{C}\{^1\text{H}\}$  NMR (100 MHz,  $\text{C}_6\text{D}_6$ ):  $\delta$  67.9, 63.0 (cage C), 56.3 (CH), 36.4, 36.3, 25.2, 23.8 ( $\text{CH}_2$  and  $\text{CH}_3$ ).  $^{11}\text{B}\{^1\text{H}\}$  NMR (128 MHz,  $\text{C}_6\text{D}_6$ ):  $\delta$  3.3 (1B) (BN), -2.5 (1B), -6.7 (1B), -10.6 (1B), -12.9 (3B), -13.9 (2B), -19.2 (1B). HRMS:  $m/z$  calcd for  $\text{C}_8\text{H}_{24}^{10}\text{B}_2^{11}\text{B}_8\text{N}^+$   $[\text{M}+\text{H}]^+$ : 242.2911. Found: 242.2908.

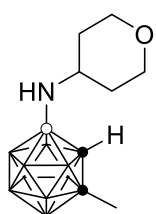

**22d**: Yield 62% (16.0 mg). Colorless oil.  $^1\text{H}$  NMR (400 MHz,  $\text{C}_6\text{D}_6$ ): 3.84 (m, 2H), 3.19 (m, 2H) ( $\text{OCH}_2$ ), 2.78 (m, 1H) (CH), 2.48 (s, 1H) (cage CH), 1.65 (m, 2H) ( $\text{CH}_2$ ), 1.20 (s, 3H) ( $\text{CH}_3$ ), 1.14 (m, 2H) ( $\text{CH}_2$ ).  $^{13}\text{C}\{^1\text{H}\}$  NMR (100 MHz,  $\text{C}_6\text{D}_6$ ):  $\delta$  67.9 (cage C), 67.2 ( $\text{OCH}_2$ ), 63.2 (cage C), 53.4 (CH), 37.6, 37.5 ( $\text{CH}_2$ ), 25.2 ( $\text{CH}_3$ ).  $^{11}\text{B}\{^1\text{H}\}$  NMR (128 MHz,  $\text{C}_6\text{D}_6$ ):  $\delta$  3.0 (1B) (BN), -2.6 (1B), -6.9 (1B), -10.8 (1B), -13.0 (3B), -14.1 (2B), -19.3 (1B). HRMS:  $m/z$  calcd for  $\text{C}_8\text{H}_{23}^{10}\text{B}_2^{11}\text{B}_8\text{NO}^+$   $[\text{M}]^+$ : 257.2777. Found: 257.2775.

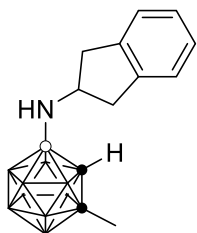

**23d:** Yield 42% (12.0 mg). Colorless crystals.  $^1\text{H}$  NMR (400 MHz,  $\text{C}_6\text{D}_6$ ): 7.11 (m, 4H) (aryl *CH*), 3.76 (m, 1H) (*CH*), 3.07 (m, 2H), 2.49 (m, 3H) ( $\text{CH}_2$  and cage *CH*), 1.19 (s, 3H) ( $\text{CH}_3$ ).  $^{13}\text{C}\{^1\text{H}\}$  NMR (100 MHz,  $\text{C}_6\text{D}_6$ ):  $\delta$  142.1, 126.8, 125.0, 124.9 (aryl *C*), 67.9, 63.1 (cage *C*), 59.4 (*CH*), 43.3, 43.3 ( $\text{CH}_2$ ), 25.2 ( $\text{CH}_3$ ).  $^{11}\text{B}\{^1\text{H}\}$  NMR (128 MHz,  $\text{C}_6\text{D}_6$ ):  $\delta$  2.9 (1B) (*BN*), -2.8 (1B), -7.0 (1B), -10.8 (1B), -13.0 (3B), -14.1 (2B), -19.3 (1B). HRMS:  $m/z$  calcd for  $\text{C}_{12}\text{H}_{23}^{10}\text{B}_2^{11}\text{B}_8\text{N}^+$  [ $\text{M}$ ] $^+$ : 289.2828. Found: 289.2824.

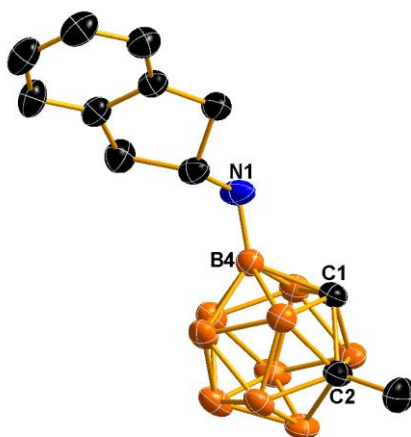

**Figure S5.** Molecular Structure of **23d**

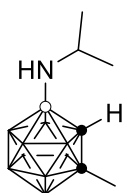

**24d:** Yield 56% (12.2 mg). Colorless oil.  $^1\text{H}$  NMR (400 MHz,  $\text{C}_6\text{D}_6$ ): 3.07 (m, 1H) (*CH*), 2.50 (s, 1H) (cage *CH*), 1.19 (s, 3H) ( $\text{CH}_3$ ), 0.98 (m, 6H) ( $\text{CH}_3$ ).  $^{13}\text{C}\{^1\text{H}\}$  NMR (100 MHz,  $\text{C}_6\text{D}_6$ ):  $\delta$  67.8, 63.1 (cage *C*), 58.6 (*CH*), 26.5, 26.4, 25.2 ( $\text{CH}_3$ ).  $^{11}\text{B}\{^1\text{H}\}$  NMR (128 MHz,  $\text{C}_6\text{D}_6$ ):  $\delta$  3.1 (1B) (*BN*), -2.7 (1B), -7.0 (1B), -10.9 (1B), -13.2 (3B), -14.3 (2B), -19.5 (1B). HRMS:  $m/z$  calcd for  $\text{C}_6\text{H}_{22}^{10}\text{B}_2^{11}\text{B}_8\text{N}^+$  [ $\text{M}+\text{H}$ ] $^+$ : 216.2750. Found: 216.2752.

### Mechanistic study.

**Synthesis of B(4)-H iridation intermediate III.** 1-COOH-2-Me-*o*-carborane **1a** (20.2 mg, 0.10 mmol) and  $\text{Cp}^*\text{Ir}(\text{OAc})_2$  (44.6 mg, 1.0 equiv, 0.10 mmol) were dissolved in toluene (0.5 mL). To the resultant clear orange solution was slowly added cyclohexamine (12.6  $\mu\text{L}$ , 1.1

equiv, 0.11 mmol). The resulting mixture was kept at room temperature for 6 hours to precipitate the complex **III** as light yellow crystals (45.0 mg, 72%).

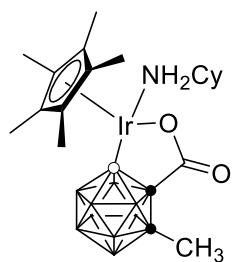

**III.**  $^1\text{H}$  NMR (400 MHz,  $\text{CD}_2\text{Cl}_2$ ):  $\delta$  3.55 (br, 1H), 3.19 (br, 1H) ( $\text{NH}_2$ ), 2.52 (m, 1H) ( $\text{CH}$ ), 2.05 (s, 3H) ( $\text{CH}_3$ ), 2.02 (m, 2H) ( $\text{CH}_2$ ), 1.76 (m, 3H) ( $\text{CH}_2$ ), 1.57 (m, 15H) ( $\text{CH}_3$ ), 1.30 (m, 2H), 1.17 (m, 3H) ( $\text{CH}_2$ ).  $^{13}\text{C}\{^1\text{H}\}$  NMR (125 MHz,  $\text{CD}_2\text{Cl}_2$ ):  $\delta$  172.0 ( $\text{C}=\text{O}$ ), 87.4, 87.3 ( $\text{Cp}^* \text{C}$ ), 80.4 (cage C), 55.3, 36.0, 34.8, 25.8, 25.5, 22.8 (Cyclohexyl C and  $\text{CH}_3$ ), 9.4, 9.4 ( $\text{Cp}^* \text{CH}_3$ ).  $^{11}\text{B}\{^1\text{H}\}$  NMR (128 MHz,  $\text{CD}_2\text{Cl}_2$ ):  $\delta$  -3.9 (1B), -6.5 (1B), -9.8 (6B), -13.0 (2B) ( $\text{B}-\text{Ir}$  and  $\text{BH}$ ). HRMS:  $m/z$  calcd for  $\text{C}_{20}\text{H}_{41}^{10}\text{B}_2^{11}\text{B}_8\text{IrNO}_2^+$   $[\text{M}+\text{H}]^+$ : 628.3757. Found: 628.3767.

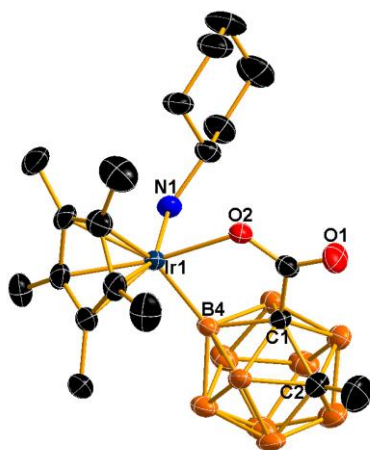

**Figure S6.** Molecular Structure of **III**

### Control experiments.

**Transformation of III.** Complex **III** (31.4 mg, 0.05 mmol),  $\text{AgOAc}$  (25.0 mg, 3.0 equiv, 0.15 mmol),  $\text{AgNTf}_2$  (19.4 mg, 1.0 equiv, 0.05 mmol) and  $\text{Cu}(\text{OAc})_2$  (4.5 mg, 0.5 equiv, 0.025 mmol) were mixed in 1,2-dichloroethane (2.0 mL). The resulting mixture was heated in a closed flask at 50 °C for 12 h under argon. Subsequently, the reaction mixture was acidified by 1M  $\text{HCl}$  (1 mL). The organic layer was washed with sat.  $\text{NaHCO}_3$  (3 x 3 mL) and extracted by dichloromethane. The organic layers were combined and dried over  $\text{MgSO}_4$ . After filtration and evaporation of volatiles under reduced pressure, the residue was subjected to flash column chromatography on silica gel (230-400 mesh) using *n*-hexane and ethyl acetate (20/1 in v/v) as eluent to give the product **20d** (9.0 mg, 71%).

**III catalyzed B(4)-H amination.** 1-COOH-2-Me-*o*-carborane **1a** (20.2 mg, 0.10 mmol), cyclohexamine (12.6  $\mu\text{L}$ , 1.1 equiv, 0.11 mmol), **III** (6.3 mg, 10 mol %, 0.01 mmol),  $\text{AgOAc}$

(50.1 mg, 3.0 equiv, 0.30 mmol), AgNTf<sub>2</sub> (38.8 mg, 1.0 equiv, 0.10 mmol) and Cu(OAc)<sub>2</sub> (9.1 mg, 0.5 equiv, 0.05 mmol) were mixed in 1,2-dichloroethane (2.0 mL). The resulting mixture was heated in a closed flask at 50 °C for 12 h under argon. Then, the reaction solution was filtered through a pad of Celite and washed with diethyl ether. The organic portions were combined. After removal of organic solvents under reduced pressure, the residue was subjected to flash column chromatography on silica gel (230-400 mesh) using *n*-hexane and ethyl acetate (20/1 in v/v) as eluent to give the product **20d** (19.1 mg, 75%).

**X-ray Structure Determination.** Single-crystal X-ray data of **11c**, **12c**, **10d**, **11d**, **23d** and **III** were collected at 293 K on a Bruker SMART 1000 CCD diffractometer using Mo-K $\alpha$  radiation. An empirical absorption correction was applied using the SADABS program.<sup>3</sup> All structures were solved by direct methods and subsequent Fourier difference techniques and refined anisotropically for all non-hydrogen atoms by full-matrix least squares calculations on  $F^2$  using the SHELXTL program package.<sup>4</sup> All hydrogen atoms were geometrically fixed using the riding model.

CCDC 2162465-2162470 for **10d**, **11c**, **11d**, **12c**, **23d** and **III** contain the supplementary crystallographic data for this paper. These data can be obtained free of charge from The Cambridge Crystallographic Data Centre via [www.ccdc.cam.ac.uk/data\\_request/cif](http://www.ccdc.cam.ac.uk/data_request/cif).



### 3. References

1. (a) Y. Quan and Z. Xie, *J. Am. Chem. Soc.* 2014, **136**, 15513-15516. (b) H. Lyu, Y. Quan and Z. Xie, *Angew. Chem., Int. Ed.* 2015, **54**, 10623-10626. (c) H. Lyu, Y. Quan and Z. Xie, *Angew. Chem., Int. Ed.* 2016, **55**, 11840-11844.
2. D. Zhao, J. J. Zhang and Z. Xie, *Angew. Chem. Int. Ed.* 2014, **53**, 8488–8491.
3. G. M. Sheldrick, SADABS: Program for Empirical Absorption Correction of Area Detector Data. University of Göttingen: Germany, 1996.
4. G. M. Sheldrick, SHELXTL 5.10 for Windows NT: Structure Determination Software Programs. Bruker Analytical X-ray Systems, Inc., Madison, Wisconsin, USA, 1997.

7.958  
7.939  
7.657  
7.639  
7.621  
7.585  
7.565  
7.547  
7.260

5.628

4.210

2.086

1.665

lhr-H-0554-CDCl3

Bruker Advance III 400

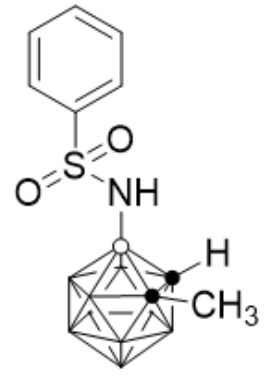

1c

$^3J$  'POT' 622'OJ | . 'EFEn<sub>3</sub>+

Current Data Parameters  
 NAME lhr-H-0554-CDCl3  
 EXPNO 1  
 PROCNO 1

F2 - Acquisition Parameters  
 Date\_ 20161203  
 Time 20.51 h  
 INSTRUM spect  
 PROBHD z824601\_0021 (  
 PULPROG zg30  
 TD 65536  
 SOLVENT CDCl3  
 NS 12  
 DS 2  
 SWH 8012.820 Hz  
 FIDRES 0.122266 Hz  
 AQ 4.0894465 sec  
 RG 203  
 DW 62.400 usec  
 DE 6.50 usec  
 TE 294.2 K  
 D1 1.00000000 sec  
 TD0 1  
 SFO1 400.1324708 MHz  
 NUC1 1H  
 P1 15.00 usec  
 PLW1 8.31000042 W

F2 - Processing parameters  
 SI 65536  
 SF 400.1300098 MHz  
 WDW EM  
 SSB 0  
 LB 0.30 Hz  
 GB 0  
 PC 1.00

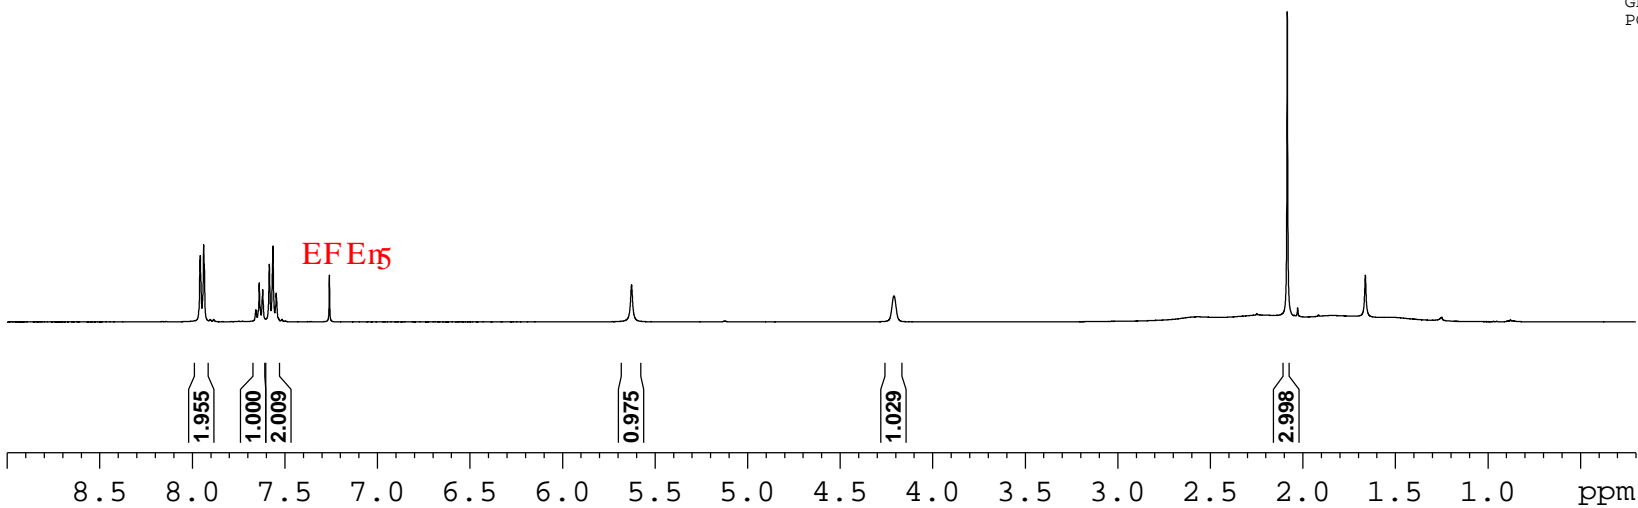

lhr-C-0554-CDC13

Bruker Advance III 400

Current Data Parameters  
NAME lhr-C-0554-CDC13  
EXPNO 1  
PROCNO 1

F2 - Acquisition Parameters  
Date\_ 20161203  
Time 21.22 h  
INSTRUM spect  
PROBHD z824601\_0021 (  
PULPROG zgpg30  
TD 65536  
SOLVENT CDC13  
NS 766  
DS 4  
SWH 24038.461 Hz  
FIDRES 0.366798 Hz  
AQ 1.3631488 sec  
RG 203  
DW 20.800 usec  
DE 6.50 usec  
TE 294.6 K  
D1 2.0000000 sec  
D11 0.0300000 sec  
TD0 1  
SFO1 100.6228298 MHz  
NUC1 13C  
P1 9.50 usec  
PLW1 41.2500000 W  
SFO2 400.1316005 MHz  
NUC2 1H  
CPDPRG[2] waltz16  
PCPD2 90.00 usec  
PLW2 8.31000042 W  
PLW12 0.23083000 W  
PLW13 0.11611000 W

F2 - Processing parameters  
SI 32768  
SF 100.6127564 MHz  
WDW EM  
SSB 0  
LB 1.00 Hz  
GB 0  
PC 1.40

141.158  
133.328  
129.397  
126.752

77.477  
77.160  
76.842  
71.771  
60.914

22.976

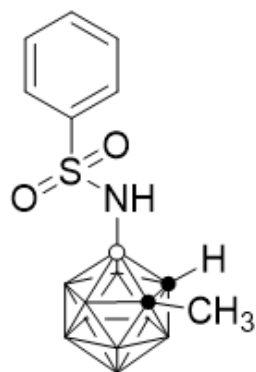

1c

$^{35}\text{E}\{^3\text{J}; \text{'POT'}^*322\text{'OJ} | \text{'EFE}\text{E}_5+$

EFE<sub>15</sub>

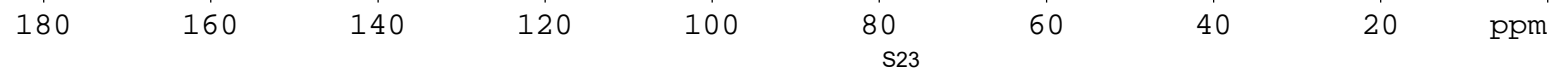

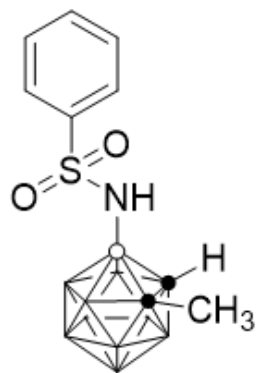

**1c**

$^{33}\text{D}\}^3\text{J}$  ; "POT"\*34: "OJ | ."EFE<sub>3</sub>+

| -4.02  
 | -5.03  
  
 | -8.93  
 | -10.24  
 | -10.92  
  
 | -12.98  
 | -14.00

lhr-B-0554-CDC13

Current Data Parameters  
 NAME lhr-B-0554-CDC13  
 EXPNO 1  
 PROCNO 1

F2 - Acquisition Parameters  
 Date\_ 20161204  
 Time 19.40 h  
 INSTRUM spect  
 PROBHD Z108618\_0257 (  
 PULPROG zgdc  
 TD 65536  
 SOLVENT CDC13  
 NS 28  
 DS 4  
 SWH 24038.461 Hz  
 FIDRES 0.366798 Hz  
 AQ 1.3631488 sec  
 RG 287  
 DW 20.800 usec  
 DE 6.50 usec  
 TE 295.5 K  
 D1 2.00000000 sec  
 D11 0.03000000 sec  
 TD0 1  
 SFO1 128.4096890 MHz  
 NUC1 11B  
 P1 7.50 usec  
 PLW1 55.09999847 W  
 SFO2 400.2316009 MHz  
 NUC2 1H  
 CPDPRG[2] waltz16  
 PCPD2 90.00 usec  
 PLW2 13.56000042 W  
 PLW12 0.27428001 W

F2 - Processing parameters  
 SI 32768  
 SF 128.4097615 MHz  
 WDW EM  
 SSB 0  
 LB 1.00 Hz  
 GB 0  
 PC 1.40

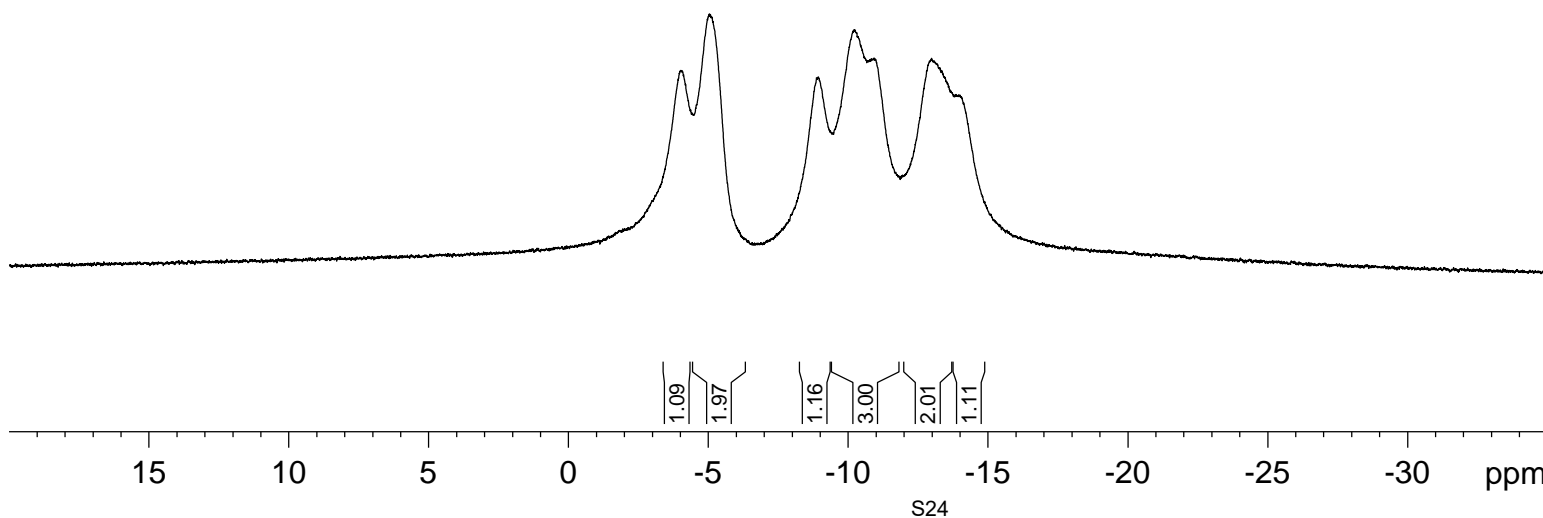

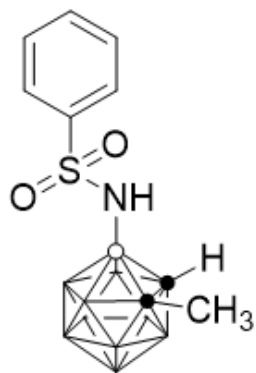

**1c**

$^{33}\text{D}'\text{POT}^*34: 'OJ | .'E\text{F}E\text{E}_3+$

| -3.27  
 | -4.58  
 | -5.63  
 | -8.15  
 | -9.35  
 | -10.34  
 | -11.44  
 | -12.13  
 | -13.28  
 | -14.49

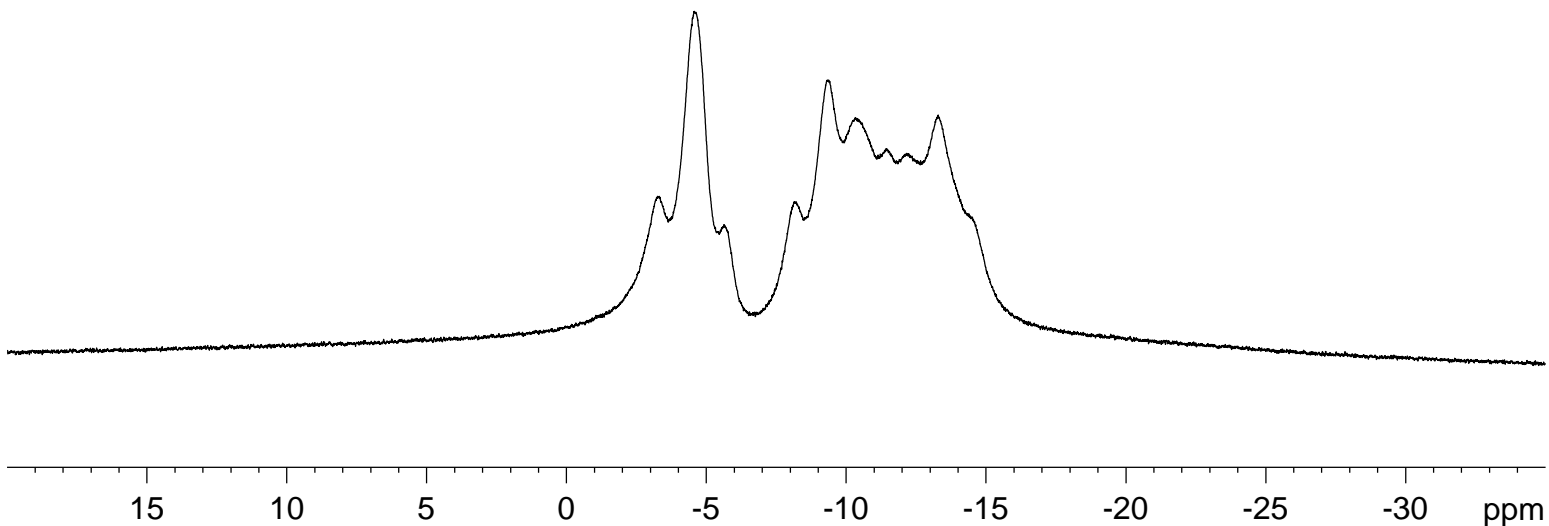

lhr-B-0554-CDCl3(C)

Current Data Parameters  
 NAME lhr-B-0554-CDCl3(C)  
 EXPNO 1  
 PROCNO 1

F2 - Acquisition Parameters  
 Date\_ 20161204  
 Time 19.43 h  
 INSTRUM spect  
 PROBHD Z108618\_0257 (  
 PULPROG zg  
 TD 65536  
 SOLVENT CDCl3  
 NS 32  
 DS 2  
 SWH 24038.461 Hz  
 FIDRES 0.366798 Hz  
 AQ 1.3631488 sec  
 RG 362  
 DW 20.800 usec  
 DE 6.50 usec  
 TE 295.4 K  
 D1 2.00000000 sec  
 TD0 1  
 SFO1 128.4096890 MHz  
 NUC1 11B  
 P1 7.50 usec  
 PLW1 55.09999847 W

F2 - Processing parameters  
 SI 32768  
 SF 128.4097430 MHz  
 WDW EM  
 SSB 0  
 LB 1.00 Hz  
 GB 0  
 PC 1.40

# Thermo QEFMS Analysis Report

## Analysis Info

|               |                                         |                |          |
|---------------|-----------------------------------------|----------------|----------|
| Sample Name : | Lhr-0554                                | Reference No.: | Qzwx138  |
| Instrument :  | Q Exactive Focus Orbitrap               |                |          |
| Source :      | APCI                                    | Polarity :     | Negative |
| Comment :     | APCI neg, 5.0uA, by LC, with sheath gas |                |          |

## Accurate Mass Measurement

|                                        |                                                                  |
|----------------------------------------|------------------------------------------------------------------|
| Molecular formula :                    | C <sub>9</sub> H <sub>19</sub> B <sub>10</sub> NO <sub>2</sub> S |
| Experimental Mass [M-H] <sup>-</sup> : | 312.20679                                                        |
| Theoretical Mass [M-H] <sup>-</sup> :  | 312.20721                                                        |
| Error (ppm) :                          | 1.3                                                              |

D:\Raw data\qzwx138\_170310145829

03/10/17 14:58:29

qzwx138\_170310145829 #79 RT: 0.36 AV: 1 SB: 81 0.18-0.30 , 0.50-0.74 NL: 4.61E6  
T: FTMS - p APCI corona Full ms [100.0000-800.0000]

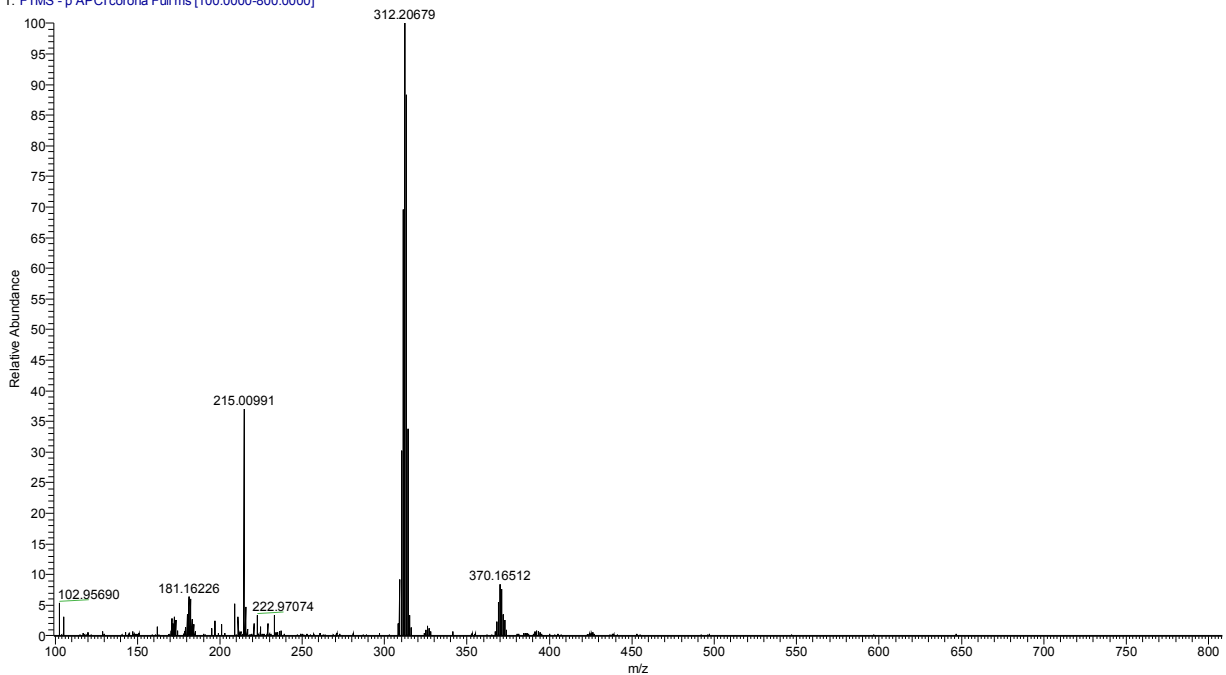

qzwx138\_170310145829 #79 RT: 0.36 AV: 1 SB: 81 0.18-0.30 , 0.50-0.74 NL: 4.61E6  
T: FTMS - p APCI corona Full ms [100.0000-800.0000]

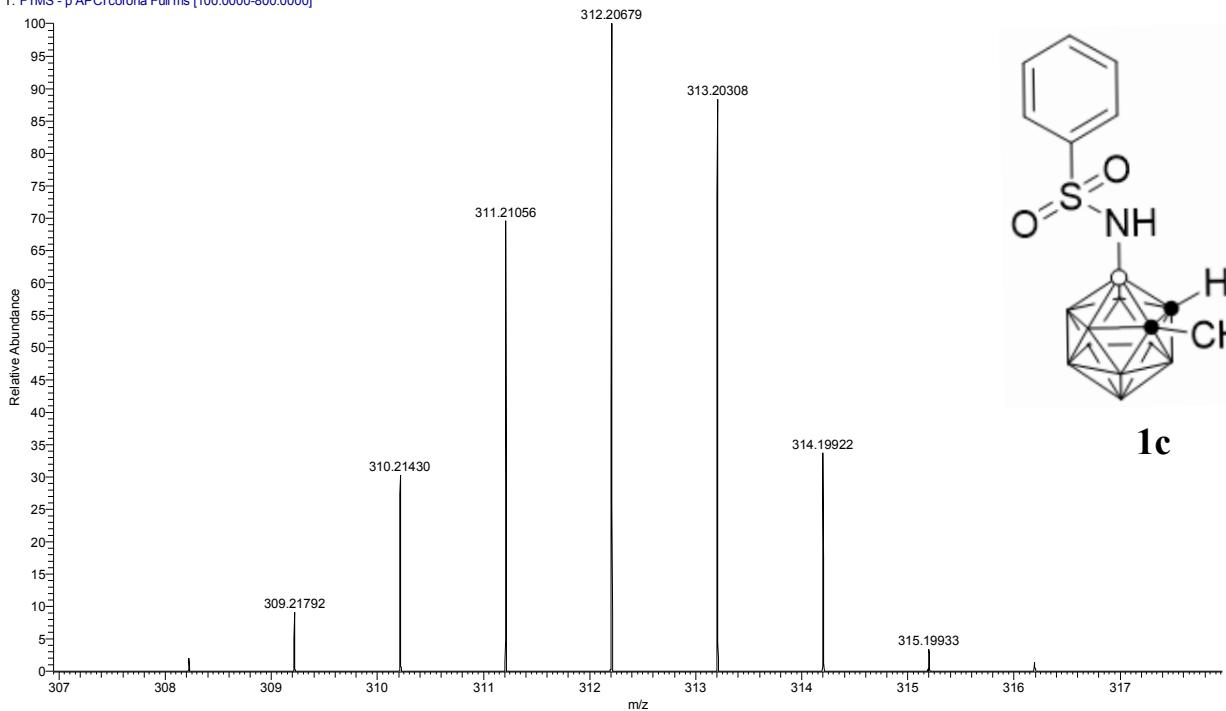

7.824  
7.803  
7.362  
7.341  
7.260

5.308

4.243

2.459

2.099

1.587

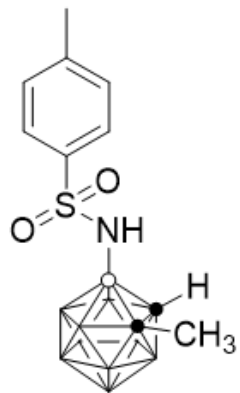

2c

$^3J$  'POT'\*622'OJ | .'EF E<sub>15</sub>+

Current Data Parameters  
NAME lhr-H-0551-re-cdcl3  
EXPNO 1  
PROCNO 1

F2 - Acquisition Parameters  
Date\_ 20190402  
Time 22.11 h  
INSTRUM spect  
PROBHD Z824601\_0021 (  
PULPROG zg30  
TD 65536  
SOLVENT CDCl3  
NS 12  
DS 2  
SWH 8012.820 Hz  
FIDRES 0.244532 Hz  
AQ 4.0894465 sec  
RG 203  
DW 62.400 usec  
DE 6.50 usec  
TE 294.7 K  
D1 1.00000000 sec  
TD0 1  
SFO1 400.1324708 MHz  
NUC1 1H  
P1 15.00 usec  
PLW1 8.31000042 W

F2 - Processing parameters  
SI 65536  
SF 400.130098 MHz  
WDW EM  
SSB 0  
LB 0.30 Hz  
GB 0  
PC 1.00

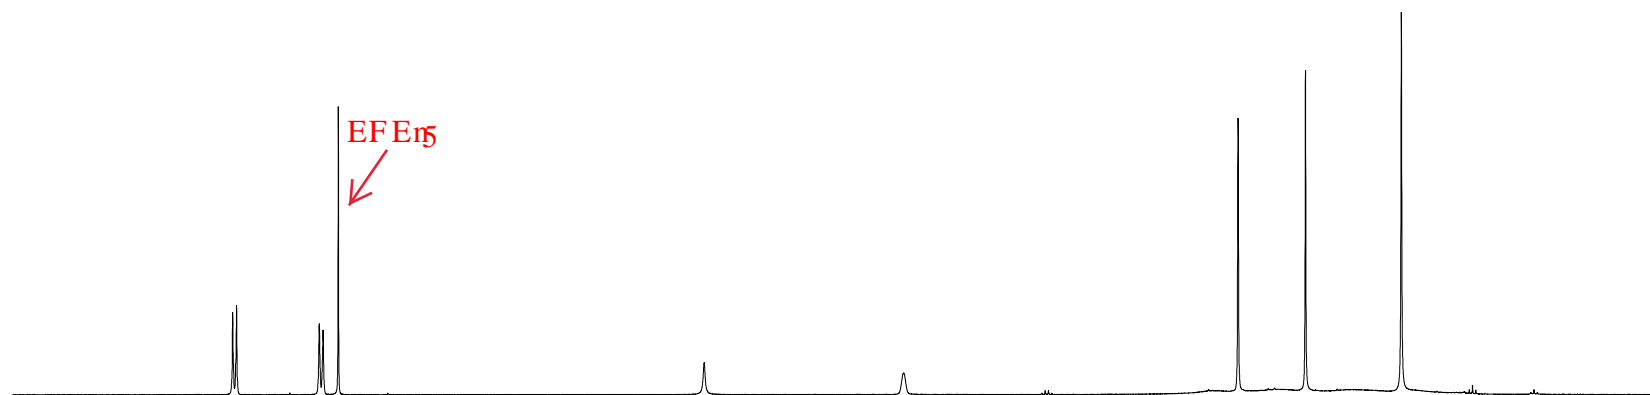

8.5 8.0 7.5 7.0 6.5 6.0 5.5 5.0 4.5 4.0 3.5 3.0 2.5 2.0 1.5 1.0 ppm

2.00  
2.02

1.08

1.07

3.14

3.09

lhr-H-0551-re-cdcl3

— 144.2313  
— 138.30  
— 129.99  
— 126.81

77.41  
77.16  
76.91  
71.82  
— 60.76

23.01  
21.76

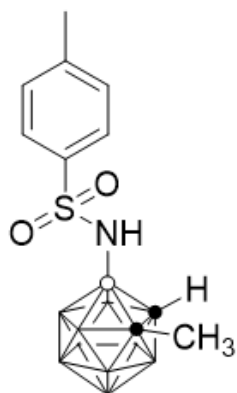

2c

<sup>35</sup>E}^3J ; 'POT'\*325'OJ | .'EFE<sub>3</sub>+

EFE<sub>3</sub>  
↓

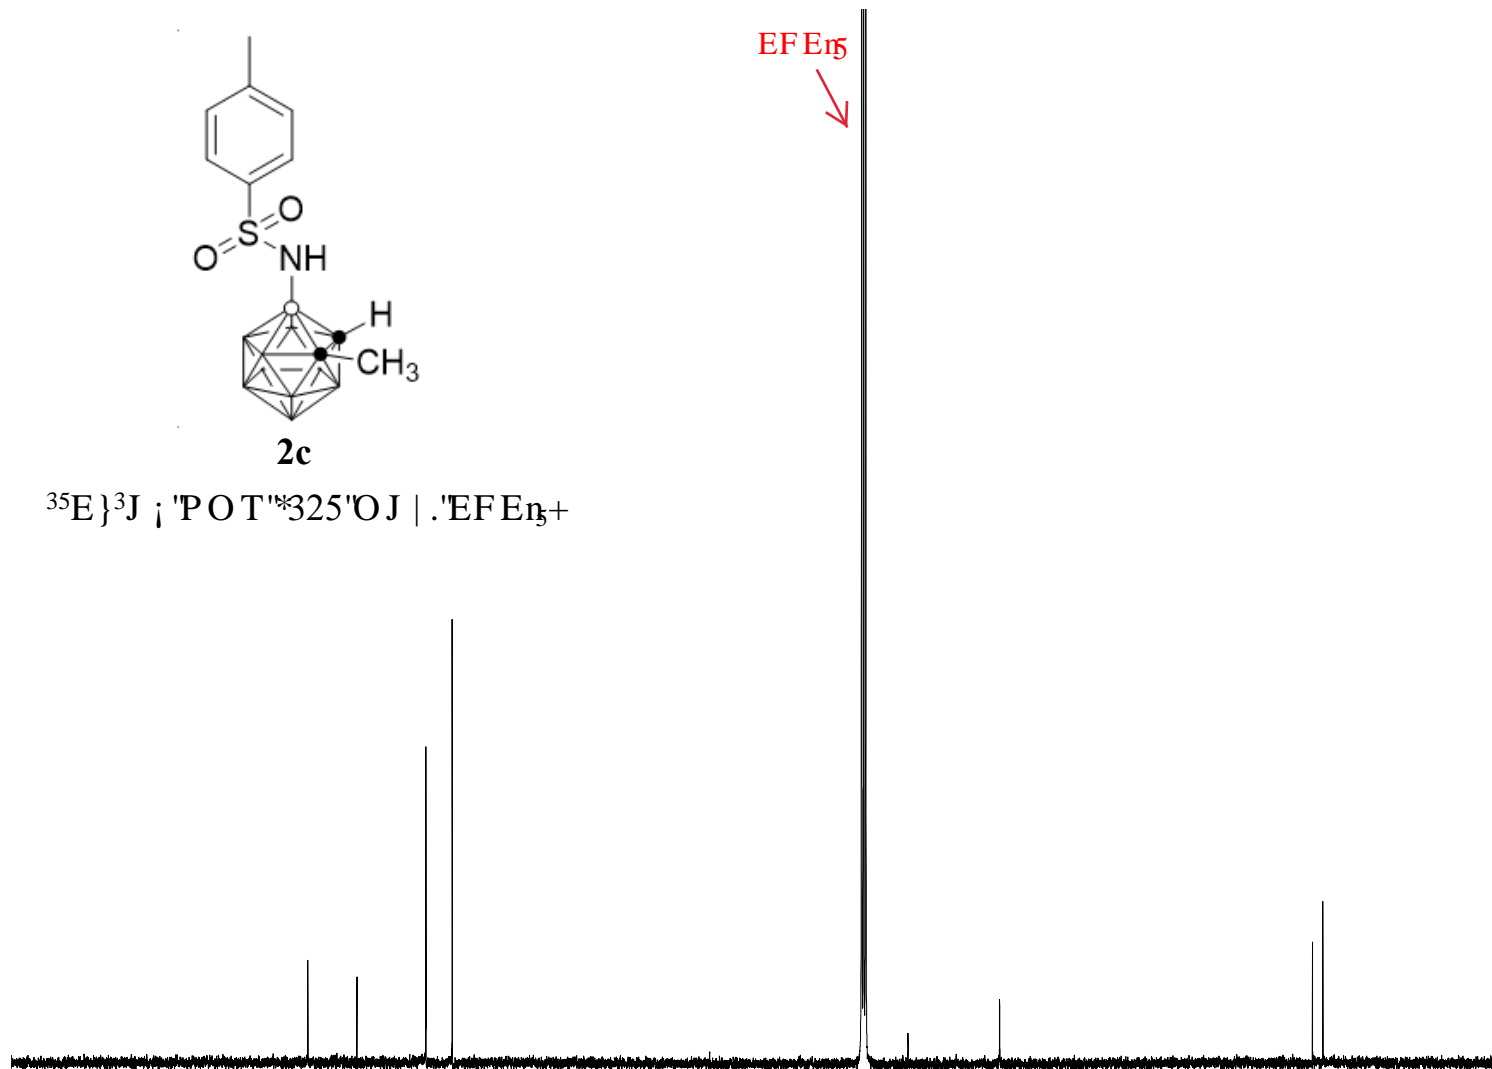

Current Data Parameters  
NAME lhr-H-0551-re-cdcl3  
EXPNO 1  
PROCNO 1

F2 - Acquisition Parameters  
Date\_ 20190403  
Time 10.04 h  
INSTRUM spect  
PROBHD Z149001\_0010 (  
PULPROG zgpg30  
TD 65536  
SOLVENT CDCl3  
NS 600  
DS 4  
SWH 29761.904 Hz  
FIDRES 0.908261 Hz  
AQ 1.1010048 sec  
RG 206.72  
DW 16.800 usec  
DE 18.00 usec  
TE 298.0 K  
D1 2.00000000 sec  
D11 0.03000000 sec  
TD0 1  
SFO1 125.7703643 MHz  
NUC1 13C  
P1 10.00 usec  
PLW1 61.00000000 W  
SFO2 500.1320005 MHz  
NUC2 1H  
CPDPRG[2] waltz16  
PCPD2 80.00 usec  
PLW2 15.00000000 W  
PLW12 0.29663000 W  
PLW13 0.14920001 W

F2 - Processing parameters  
SI 32768  
SF 125.7577714 MHz  
WDW EM  
SSB 0  
LB 1.00 Hz  
GB 0  
PC 1.40

170 160 150 140 130 120 110 100 90 80 70 60 50 40 30 20 ppm



1hr-B-0551-24-CDCl3

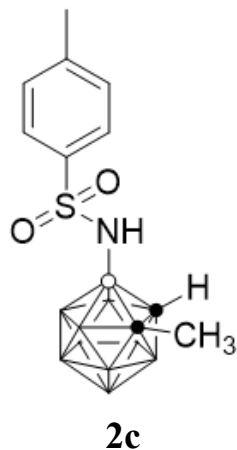

$^{33}\text{D}\}^3\text{J}$  ; 'POT'\*34: 'OJ | .'EF E<sub>5</sub>+

5.31  
6.21  
6.43  
10.17  
11.56  
12.10  
14.35  
15.24

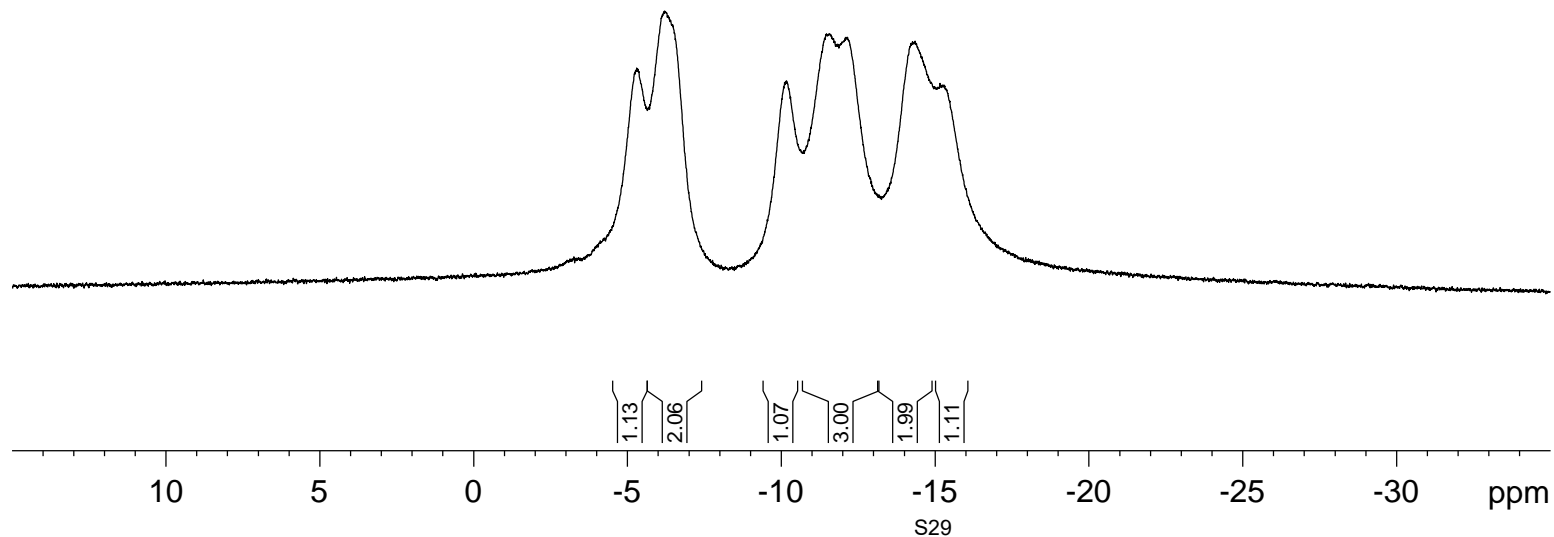

Current Data Parameters  
NAME 1hr-B-0551-24-CDCl3  
EXPNO 1  
PROCNO 1

F2 - Acquisition Parameters  
Date\_ 20161130  
Time 21.15 h  
INSTRUM spect  
PROBHD Z108618\_0257 (  
PULPROG zgdc  
TD 65536  
SOLVENT CDCl3  
NS 16  
DS 4  
SWH 24038.461 Hz  
FIDRES 0.366798 Hz  
AQ 1.3631488 sec  
RG 287  
DW 20.800 usec  
DE 6.50 usec  
TE 296.2 K  
D1 2.00000000 sec  
D11 0.03000000 sec  
TD0 1  
SFO1 128.4096890 MHz  
NUC1 11B  
P1 7.50 usec  
PLW1 55.09999847 W  
SFO2 400.2316009 MHz  
NUC2 1H  
CPDPRG[2] waltz16  
PCPD2 90.00 usec  
PLW2 13.56000042 W  
PLW12 0.27428001 W

F2 - Processing parameters  
SI 32768  
SF 128.4097615 MHz  
WDW EM  
SSB 0  
LB 1.00 Hz  
GB 0  
PC 1.40

1hr-B-0551-24-CDC13(C)

Current Data Parameters  
NAME 1hr-B-0551-24-CDC13(C)  
EXPNO 1  
PROCNO 1

F2 - Acquisition Parameters  
Date\_ 20161130  
Time 21.18 h  
INSTRUM spect  
PROBHD Z108618\_0257 (  
PULPROG zg  
TD 65536  
SOLVENT CDC13  
NS 25  
DS 2  
SWH 24038.461 Hz  
FIDRES 0.366798 Hz  
AQ 1.3631488 sec  
RG 203  
DW 20.800 usec  
DE 6.50 usec  
TE 296.0 K  
D1 2.0000000 sec  
TD0 1  
SFO1 128.4096890 MHz  
NUC1 11B  
P1 7.50 usec  
PLW1 55.09999847 W

F2 - Processing parameters  
SI 32768  
SF 128.4097430 MHz  
WDW EM  
SSB 0  
LB 1.00 Hz  
GB 0  
PC 1.40

4.54  
5.86  
6.98  
9.40  
10.63  
11.55  
12.67  
13.51  
14.58  
15.75

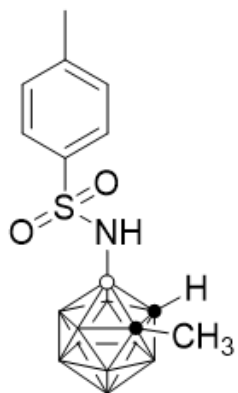

2c

$^{33}\text{D}'\text{POT}^*34: \text{'OJ} | \text{'EFE}_{13}+$

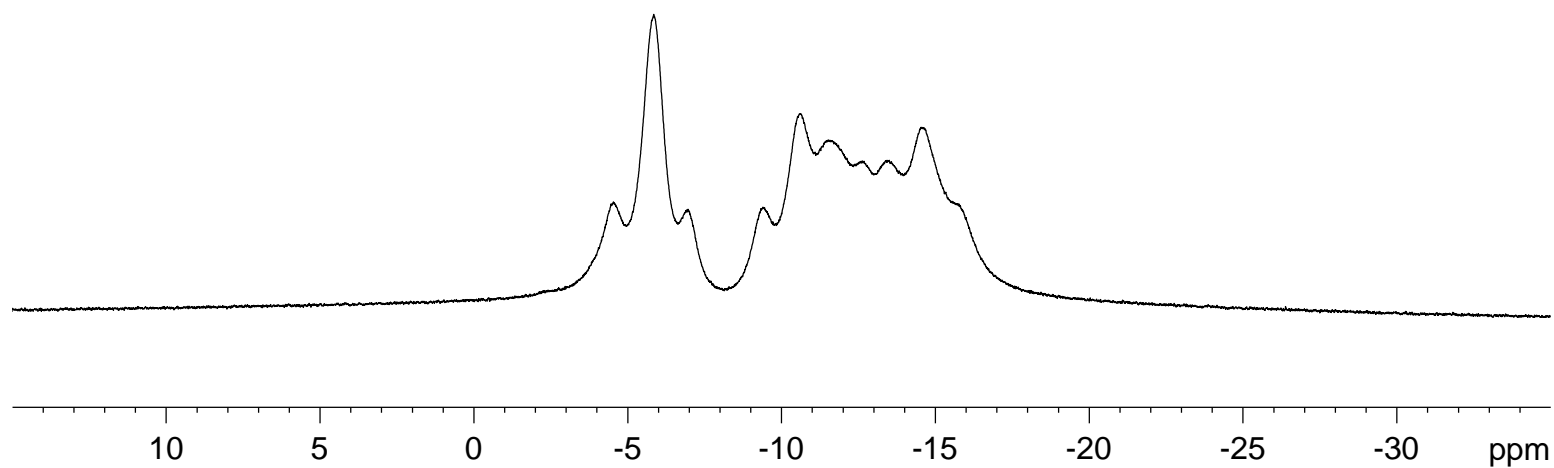

# Thermo QEFMS Analysis Report

## Analysis Info

|               |                                         |                |          |
|---------------|-----------------------------------------|----------------|----------|
| Sample Name : | Lhr-0551                                | Reference No.: | Qzwx139  |
| Instrument :  | Q Exactive Focus Orbitrap               |                |          |
| Source :      | APCI                                    | Polarity :     | Negative |
| Comment :     | APCI neg, 5.0uA, by LC, with sheath gas |                |          |

## Accurate Mass Measurement

|                                        |                                                                   |
|----------------------------------------|-------------------------------------------------------------------|
| Molecular formula :                    | C <sub>10</sub> H <sub>21</sub> B <sub>10</sub> NO <sub>2</sub> S |
| Experimental Mass [M-H] <sup>-</sup> : | 326.22233                                                         |
| Theoretical Mass [M-H] <sup>-</sup> :  | 326.22291                                                         |
| Error (ppm) :                          | 1.7                                                               |

D:\Raw data\qzwx139\_170310150650

03/10/17 15:08:02

qzwx139\_170310150650 #79 RT: 0.36 AV: 1 SB: 109 0.13-0.30, 0.49-0.81 NL: 4.08E6  
T: FTMS - p APCI corona Full ms [100.0000-800.0000]

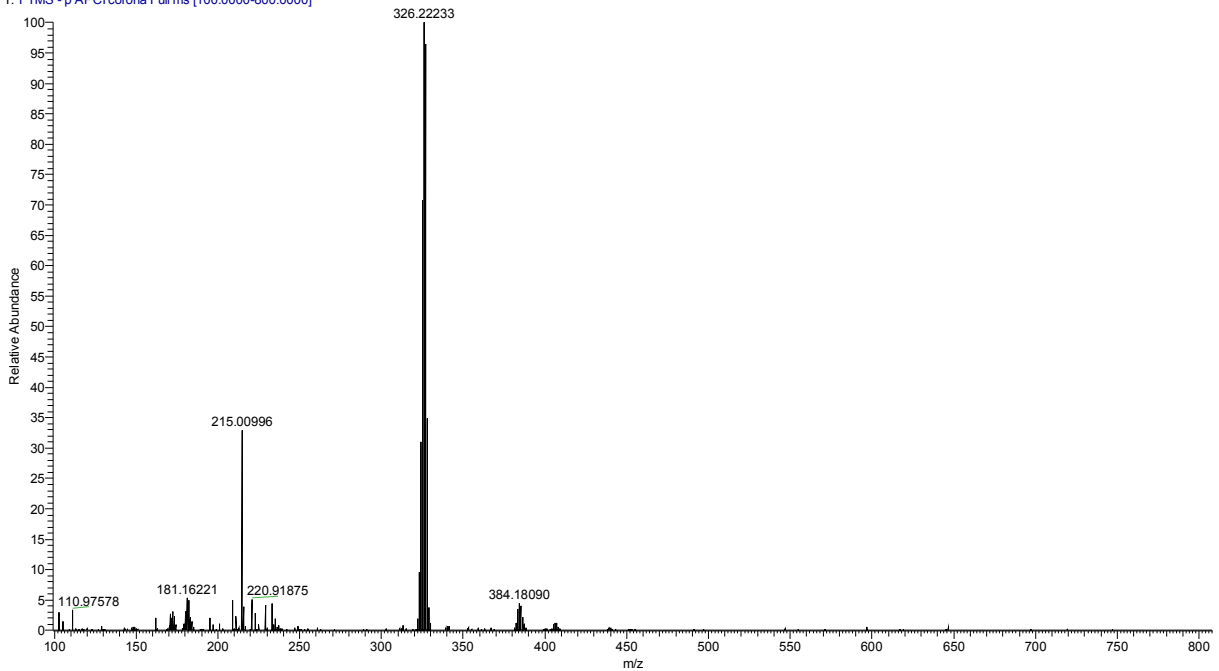

qzwx139\_170310150650 #79 RT: 0.36 AV: 1 SB: 109 0.13-0.30, 0.49-0.81 NL: 4.08E6  
T: FTMS - p APCI corona Full ms [100.0000-800.0000]

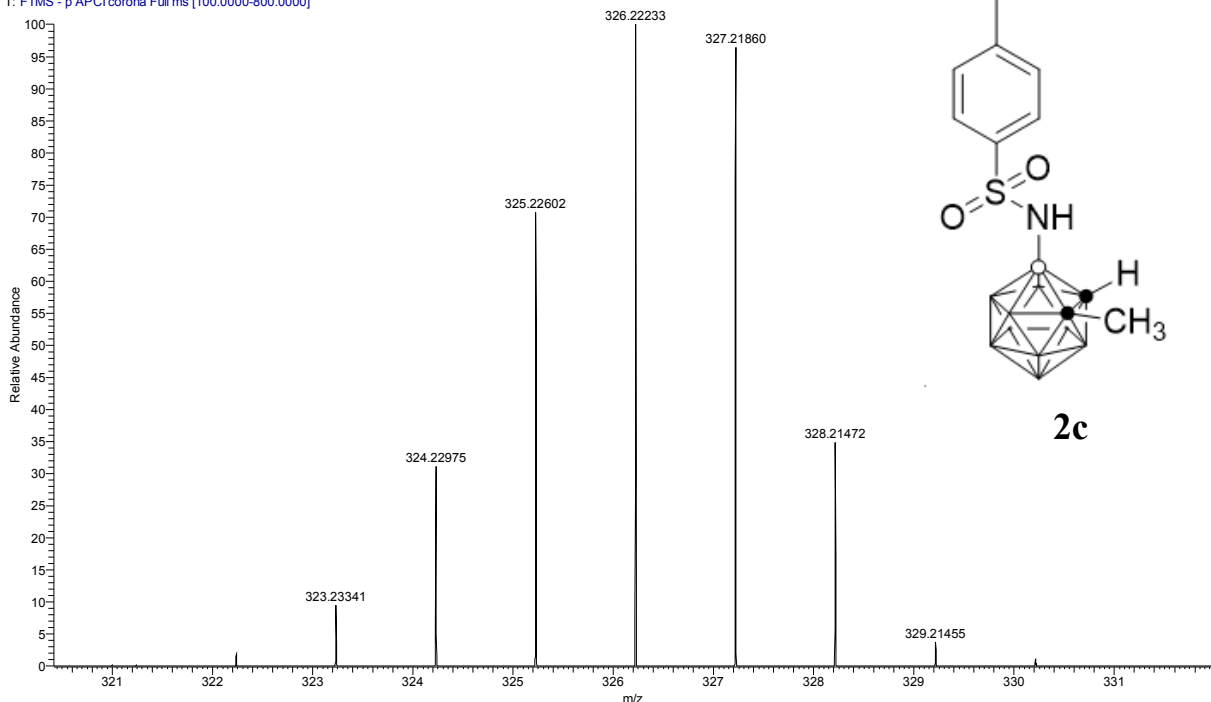

lhr-H-0577-cc-CDCl3

Bruker Advance III 400

Current Data Parameters  
NAME lhr-H-0577-cc-CDCl3  
EXPNO 1  
PROCNO 1

F2 - Acquisition Parameters  
Date\_ 20161230  
Time 14.35 h  
INSTRUM spect  
PROBHD zg30  
PULPROG zg30  
TD 65536  
SOLVENT CDCl3  
NS 12  
DS 2  
SWH 8012.820 Hz  
FIDRES 0.122266 Hz  
AQ 4.0894465 sec  
RG 203  
DW 62.400 usec  
DE 6.50 usec  
TE 295.2 K  
D1 1.0000000 sec  
TD0 1  
SFO1 400.1324708 MHz  
NUC1 1H  
P1 15.00 usec  
PLW1 8.31000042 W

F2 - Processing parameters  
SI 65536  
SF 400.1300097 MHz  
WDW EM  
SSB 0  
LB 0.30 Hz  
GB 0  
PC 1.00

7.997  
7.978  
7.532  
7.530  
7.511  
7.495  
7.493  
7.383  
7.376  
7.364  
7.357  
7.337  
7.260

5.694

4.153

2.737

2.090

1.658

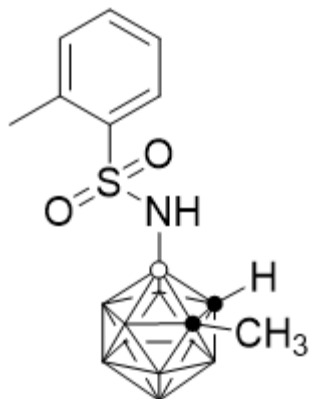

3c

$^3\text{J } ^1\text{POT}^*622^{\circ}\text{OJ} | .^1\text{EFEn}_5+$

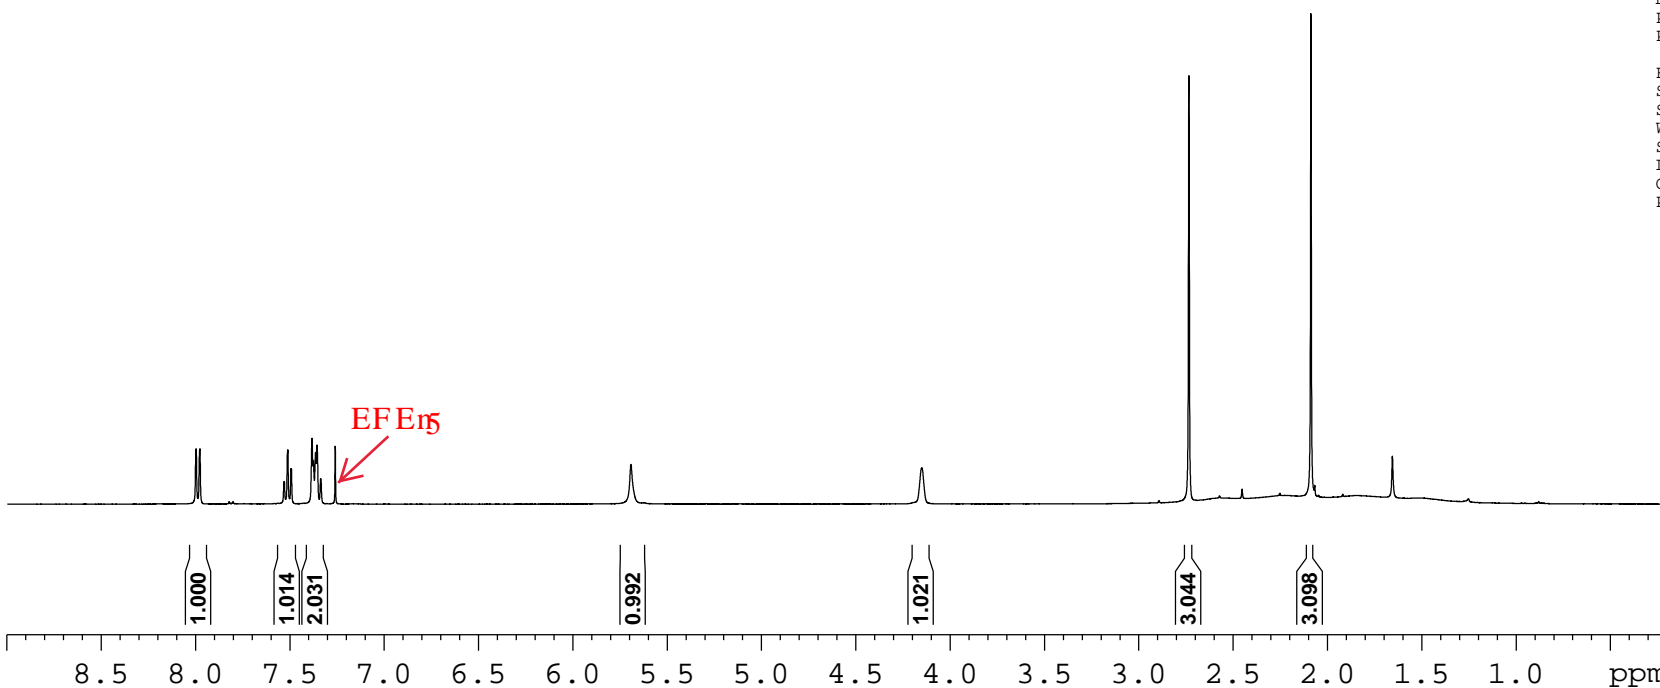

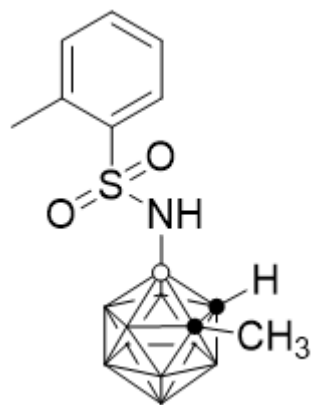

3c

$^{35}\text{E} \{^3\text{J} ; ^1\text{POT}^*322^{\circ}\text{OJ} | ^1\text{EF E}_{15}^+$

139.127  
136.737  
133.388  
132.849  
128.728  
126.483

77.478  
77.160  
76.843  
71.828

60.823

22.928  
20.338

lhr-C-0577-cc-CDC13

Bruker Advance III 400

Current Data Parameters  
NAME lhr-C-0577-cc-CDC13  
EXPNO 1  
PROCNO 1

F2 - Acquisition Parameters  
Date\_ 20161230  
Time 14.39 h  
INSTRUM spect  
PROBHD Z824601\_0021 (  
PULPROG zgpg30  
TD 65536  
SOLVENT CDC13  
NS 394  
DS 4  
SWH 24038.461 Hz  
FIDRES 0.366798 Hz  
AQ 1.3631488 sec  
RG 203  
DW 20.800 usec  
DE 6.50 usec  
TE 295.4 K  
D1 2.0000000 sec  
D11 0.0300000 sec  
TD0 1  
SFO1 100.6228298 MHz  
NUC1 13C  
P1 9.50 usec  
PLW1 41.2500000 W  
SFO2 400.1316005 MHz  
NUC2 1H  
CPDPRG[2] waltz16  
PCPD2 90.00 usec  
PLW2 8.31000042 W  
PLW12 0.23083000 W  
PLW13 0.11611000 W

F2 - Processing parameters  
SI 32768  
SF 100.6127569 MHz  
WDW EM  
SSB 0  
LB 1.00 Hz  
GB 0  
PC 1.40

EF E<sub>15</sub>

180 160 140 120 100 80 60 40 20 ppm

S33

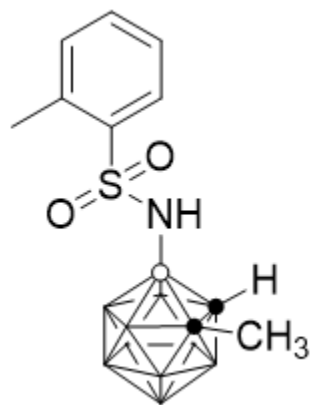

**3c**

$^{33}\text{D}\}^3\text{J} ; \text{'POT'*34: 'OJ | . 'E F E n_5+$

— 5.30  
— 6.42  
  
— 10.20  
— 11.49  
— 12.09  
  
— 14.13  
— 14.66  
— 15.21

lhr-B-0577-cc-CDCl3

Current Data Parameters  
NAME lhr-B-0577-cc-CDCl3  
EXPNO 1  
PROCNO 1

F2 - Acquisition Parameters  
Date\_ 20161230  
Time 14.25 h  
INSTRUM spect  
PROBHD Z108618\_0257 (  
PULPROG zgdc  
TD 65536  
SOLVENT CDCl3  
NS 16  
DS 4  
SWH 24038.461 Hz  
FIDRES 0.366798 Hz  
AQ 1.3631488 sec  
RG 287  
DW 20.800 usec  
DE 6.50 usec  
TE 295.3 K  
D1 2.00000000 sec  
D11 0.03000000 sec  
TD0 1  
SFO1 128.4096890 MHz  
NUC1 11B  
P1 7.50 usec  
PLW1 55.09999847 W  
SFO2 400.2316009 MHz  
NUC2 1H  
CPDPRG[2 waltz16  
PCPD2 90.00 usec  
PLW2 13.56000042 W  
PLW12 0.27428001 W

F2 - Processing parameters  
SI 32768  
SF 128.4097615 MHz  
WDW EM  
SSB 0  
LB 1.00 Hz  
GB 0  
PC 1.40

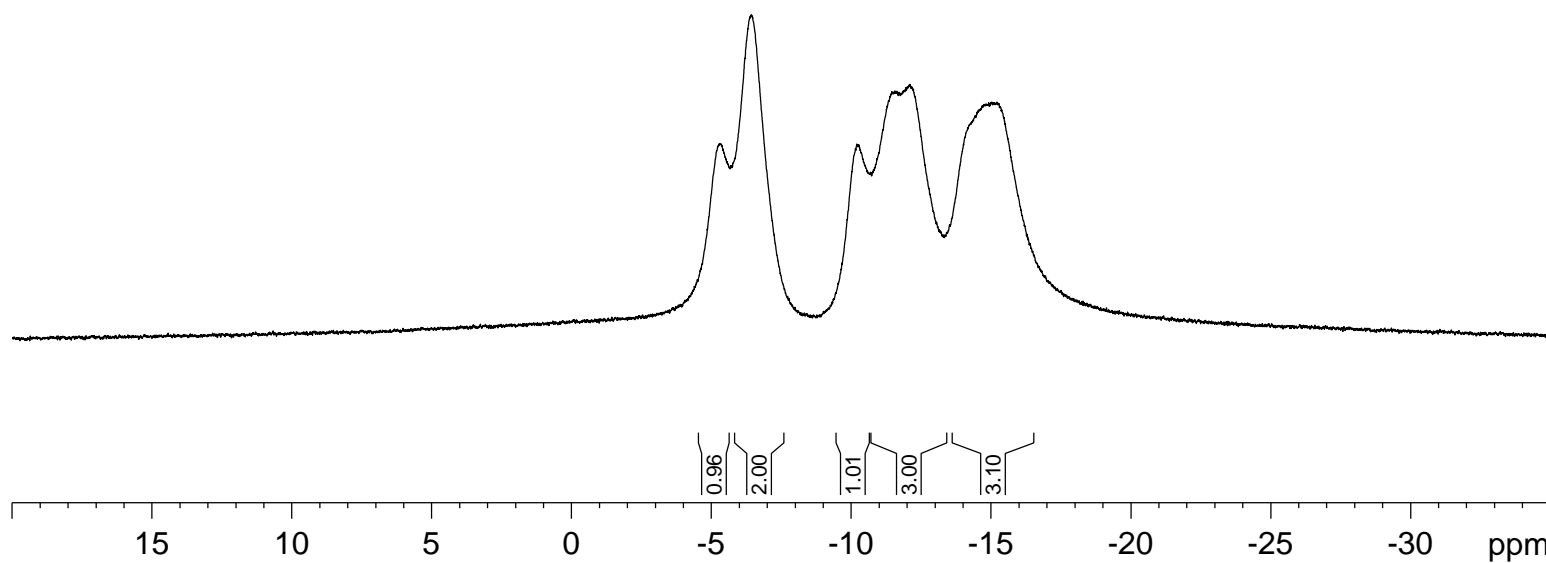

1hr-B-0577-cc-CDCl3(C)

Current Data Parameters  
NAME 1hr-B-0577-cc-CDCl3(C)  
EXPNO 1  
PROCNO 1

F2 - Acquisition Parameters  
Date\_ 20161230  
Time 14.28 h  
INSTRUM spect  
PROBHD Z108618\_0257 (  
PULPROG zg  
TD 65536  
SOLVENT CDCl3  
NS 25  
DS 2  
SWH 24038.461 Hz  
FIDRES 0.366798 Hz  
AQ 1.3631488 sec  
RG 203  
DW 20.800 usec  
DE 6.50 usec  
TE 295.1 K  
D1 2.0000000 sec  
TD0 1  
SFO1 128.4096890 MHz  
NUC1 11B  
P1 7.50 usec  
PLW1 55.09999847 W

F2 - Processing parameters  
SI 32768  
SF 128.4097504 MHz  
WDW EM  
SSB 0  
LB 1.00 Hz  
GB 0  
PC 1.40

4.64  
6.05  
6.89  
9.49  
10.72  
11.66  
12.65  
13.30  
14.63  
15.73

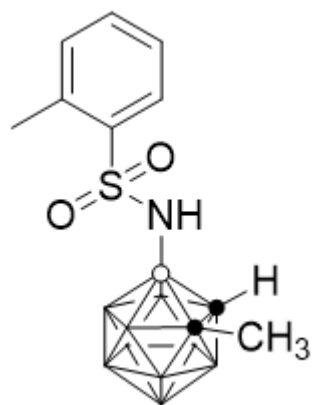

3c

<sup>33</sup>D POT 34: 'OJ | . 'E F E n<sub>3</sub> +

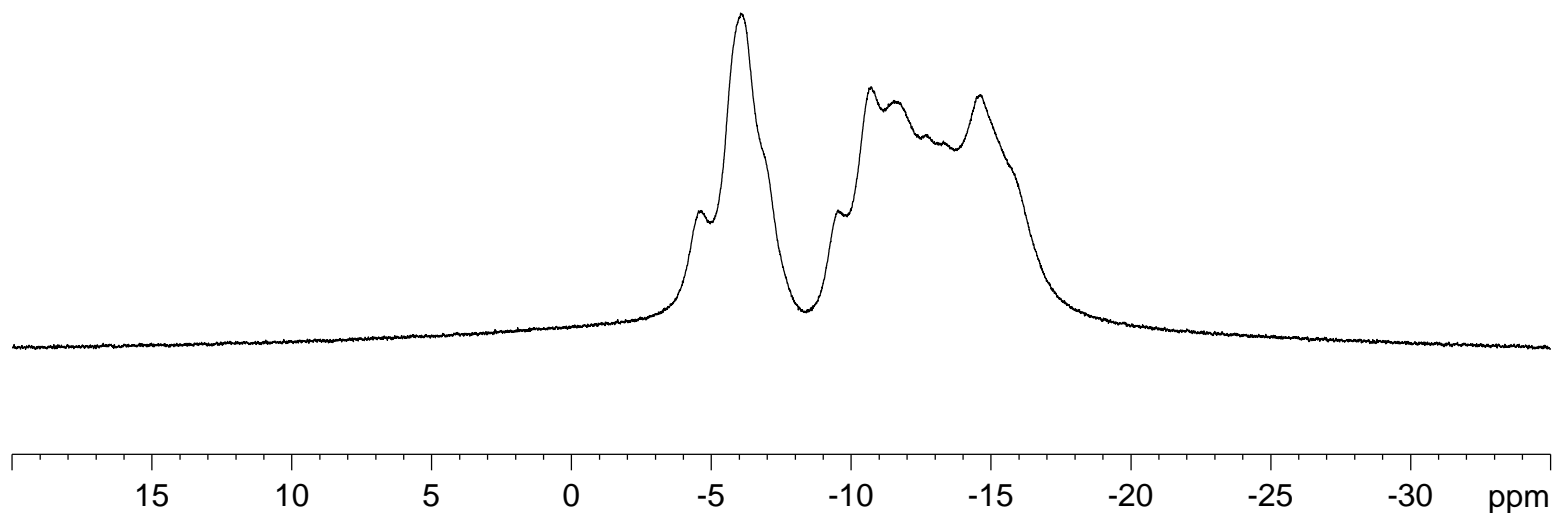

# Thermo QEFMS Analysis Report

## Analysis Info

|               |                                         |                |          |
|---------------|-----------------------------------------|----------------|----------|
| Sample Name : | Lhr-0577                                | Reference No.: | Qzwx149  |
| Instrument :  | Q Exactive Focus Orbitrap               |                |          |
| Source :      | APCI                                    | Polarity :     | Negative |
| Comment :     | APCI neg, 5.0uA, by LC, with sheath gas |                |          |

## Accurate Mass Measurement

|                                        |                                                                   |
|----------------------------------------|-------------------------------------------------------------------|
| Molecular formula :                    | C <sub>10</sub> H <sub>21</sub> B <sub>10</sub> NO <sub>2</sub> S |
| Experimental Mass [M-H] <sup>-</sup> : | 326.22244                                                         |
| Theoretical Mass [M-H] <sup>-</sup> :  | 326.22291                                                         |
| Error (ppm) :                          | 1.4                                                               |

D:\Raw data\qzwx149\_170310160826

03/10/17 16:09:33

qzwx149\_170310160826 #92 RT: 0.42 AV: 1 NL: 6.53E7  
T: FTMS - p APCI corona Full ms [100.0000-800.0000]

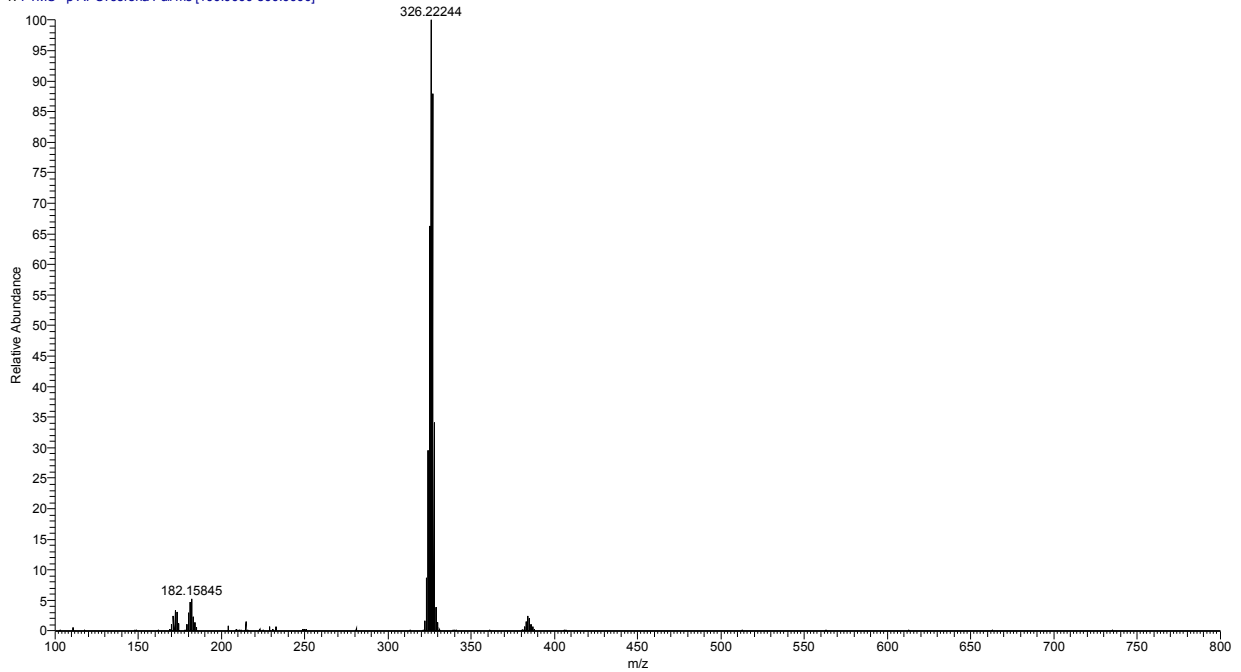

qzwx149\_170310160826 #92 RT: 0.42 AV: 1 NL: 6.53E7  
T: FTMS - p APCI corona Full ms [100.0000-800.0000]

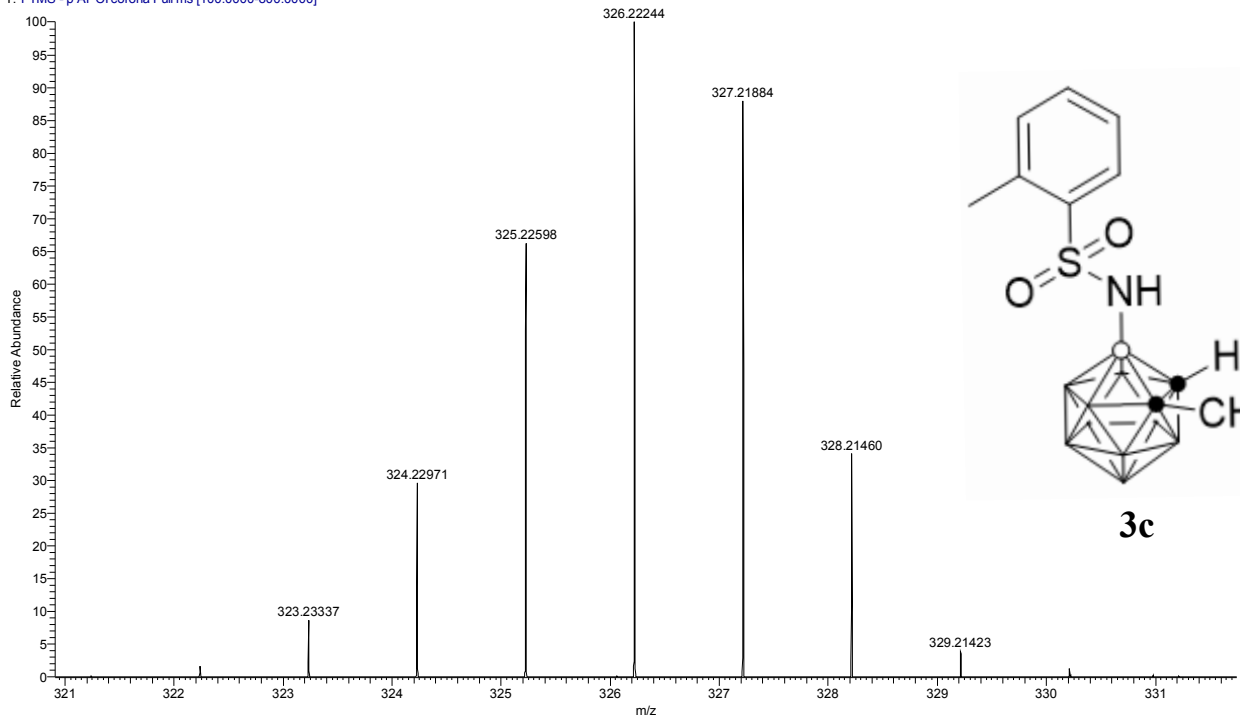



7.876  
7.853

7.260  
7.024  
7.002

5.389

4.218

3.896

2.090

1.598

[1hr-H-0559-2-cc-CDC]

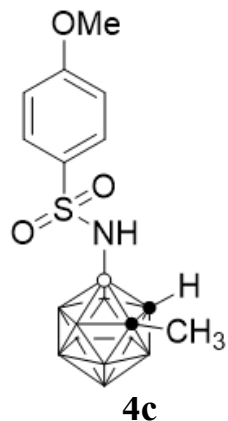

$^3J$  'POT'\*622'OJ |.'EF E<sub>15</sub>+

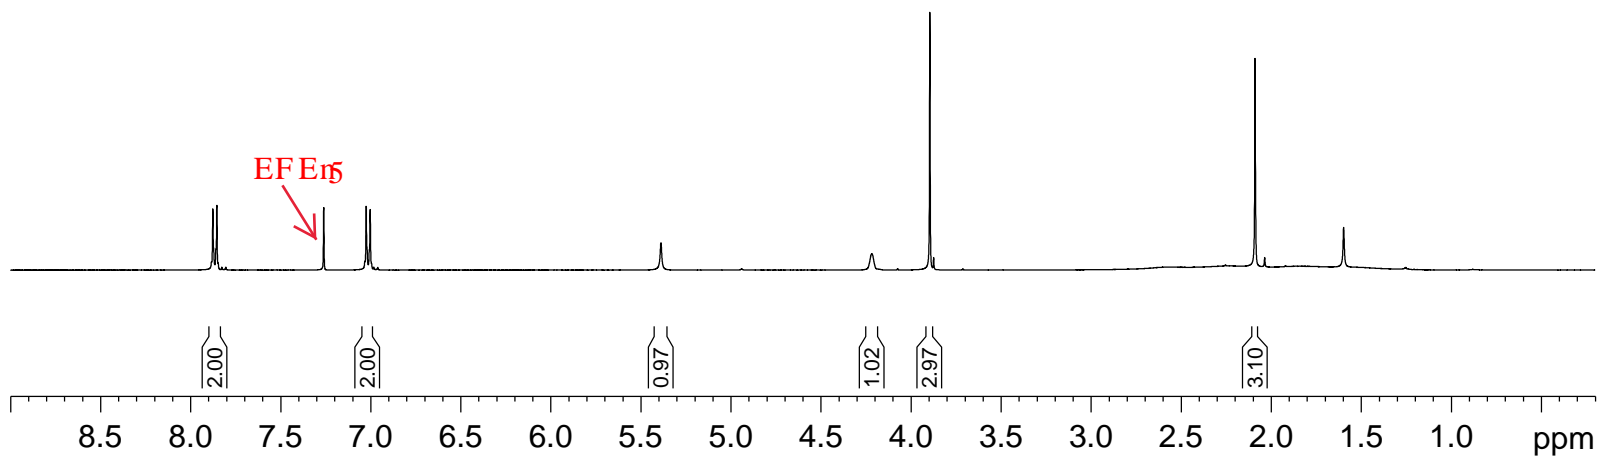

Current Data Parameters  
NAME 1hr-H-0559-2-cc-CDCI3  
EXPNO 1  
PROCNO 1

F2 - Acquisition Parameters

Date\_ 20161215  
Time 11.02 h  
INSTRUM spect  
PROBHD Z108618\_0257 (  
PULPROG zg30  
TD 65536  
SOLVENT CDCl3  
NS 12  
DS 2  
SWH 8012.820 Hz  
FIDRES 0.122266 Hz  
AQ 4.0894465 sec  
RG 128  
DW 62.400 usec  
DE 6.50 usec  
TE 295.7 K  
D1 1.00000000 sec  
TD0 1  
SFO1 400.2324714 MHz  
NUC1 1H  
P1 12.80 usec  
PLW1 13.56000042 W

F2 - Processing parameters

SI 65536  
SF 400.2300106 MHz  
WDW EM  
SSB 0  
LB 0.30 Hz  
GB 0  
PC 1.00

lhr-C-0559-2-cc-CDC13

Bruker Advance III 400

Current Data Parameters  
NAME lhr-C-0559-2-cc-CDC13  
EXPNO 1  
PROCNO 1

F2 - Acquisition Parameters  
Date\_ 20161215  
Time 11.48 h  
INSTRUM spect  
PROBHD Z824601\_0021 (  
PULPROG zgpg30  
TD 65536  
SOLVENT CDC13  
NS 880  
DS 4  
SWH 24038.461 Hz  
FIDRES 0.366798 Hz  
AQ 1.3631488 sec  
RG 203  
DW 20.800 usec  
DE 6.50 usec  
TE 295.3 K  
D1 2.00000000 sec  
D11 0.03000000 sec  
TD0 1  
SFO1 100.6228298 MHz  
NUC1 13C  
P1 9.50 usec  
PLW1 41.25000000 W  
SFO2 400.1316005 MHz  
NUC2 1H  
CPDPRG[2] waltz16  
PCPD2 90.00 usec  
PLW2 8.31000042 W  
PLW12 0.23083000 W  
PLW13 0.11611000 W

F2 - Processing parameters  
SI 32768  
SF 100.6127556 MHz  
WDW EM  
SSB 0  
LB 1.00 Hz  
GB 0  
PC 1.40

163.348  
132.840  
128.999  
114.489

77.478  
77.160  
76.843  
71.796  
60.812  
55.821

22.999

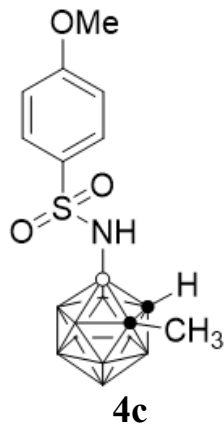

4c

$^{35}\text{E}\}^3\text{J} ; \text{'POT}^*322\text{'OJ} | \text{'EFEN}_3+$

EFEN<sub>3</sub>

180 160 140 120 100 80 60 40 20 ppm

S38

1hr-B-0559-cc-CDCl3

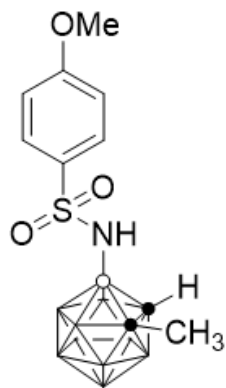

4c

$^{33}\text{D}\}^3\text{J}$  ; 'POT'\*34: 'OJ | .'EFEN<sub>5</sub>+

— -5.68  
— -6.53  
  
— -10.43  
— -11.78  
— -12.47  
  
— -14.61  
— -15.56

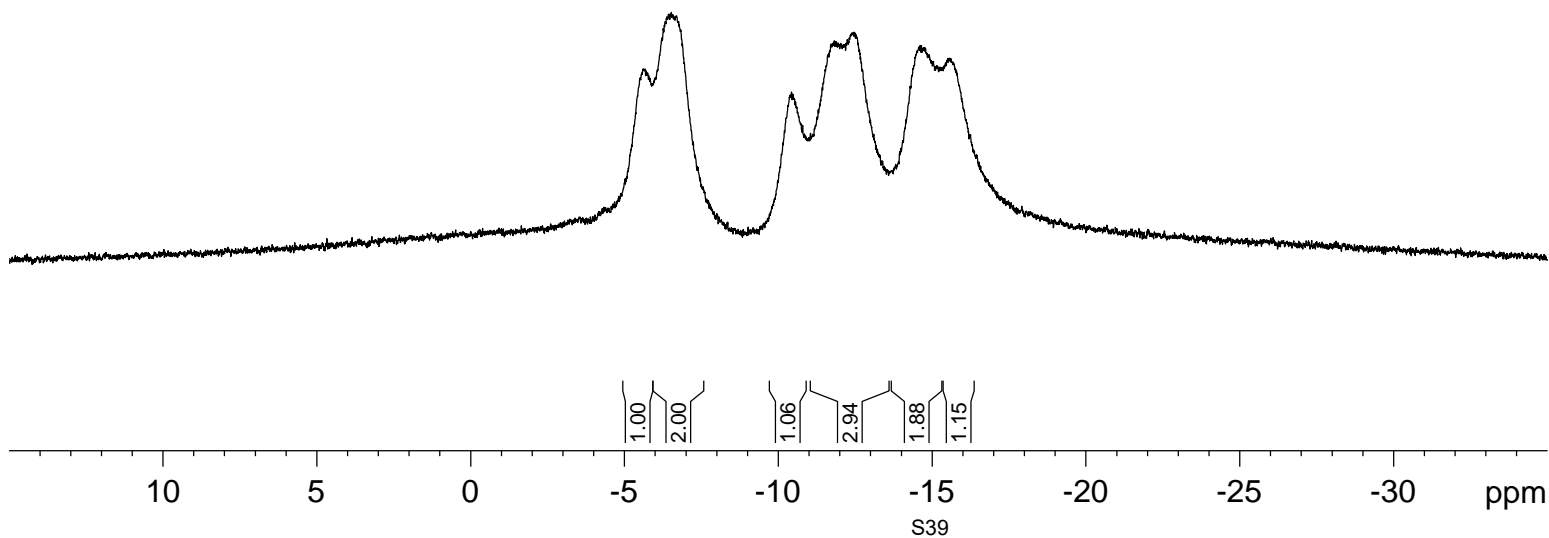

Current Data Parameters  
NAME 1hr-B-0559-cc-CDCl3  
EXPNO 1  
PROCNO 1

F2 - Acquisition Parameters  
Date\_ 20161215  
Time 16.30 h  
INSTRUM spect  
PROBHD Z108618\_0257 (  
PULPROG zgdc  
TD 65536  
SOLVENT CDCl3  
NS 16  
DS 4  
SWH 24038.461 Hz  
FIDRES 0.366798 Hz  
AQ 1.3631488 sec  
RG 287  
DW 20.800 usec  
DE 6.50 usec  
TE 296.7 K  
D1 2.00000000 sec  
D11 0.03000000 sec  
TD0 1  
SFO1 128.4096890 MHz  
NUC1 11B  
P1 7.50 usec  
PLW1 55.09999847 W  
SFO2 400.2316009 MHz  
NUC2 1H  
CPDPRG[2] waltz16  
PCPD2 90.00 usec  
PLW2 13.56000042 W  
PLW12 0.27428001 W

F2 - Processing parameters  
SI 32768  
SF 128.4097615 MHz  
WDW EM  
SSB 0  
LB 1.00 Hz  
GB 0  
PC 1.40

1hr-B-0559-cc-CDCl3(C)

Current Data Parameters  
NAME 1hr-B-0559-cc-CDCl3(C)  
EXPNO 1  
PROCNO 1

F2 - Acquisition Parameters  
Date\_ 20161215  
Time 16.32 h  
INSTRUM spect  
PROBHD Z108618\_0257 (  
PULPROG zg  
TD 65536  
SOLVENT CDCl3  
NS 33  
DS 2  
SWH 24038.461 Hz  
FIDRES 0.366798 Hz  
AQ 1.3631488 sec  
RG 362  
DW 20.800 usec  
DE 6.50 usec  
TE 296.4 K  
D1 2.0000000 sec  
TD0 1  
SFO1 128.4096890 MHz  
NUC1 11B  
P1 7.50 usec  
PLW1 55.09999847 W

F2 - Processing parameters  
SI 32768  
SF 128.4097430 MHz  
WDW EM  
SSB 0  
LB 1.00 Hz  
GB 0  
PC 1.40

4.86  
6.10  
7.20  
9.70  
10.88  
11.83  
12.85  
13.78  
14.92  
15.96

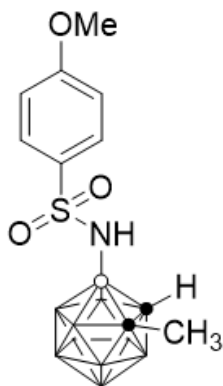

4c

$^{33}\text{D}'\text{POT}^{\text{M}}\text{34: 'OJ | . 'EFEn}_3+$

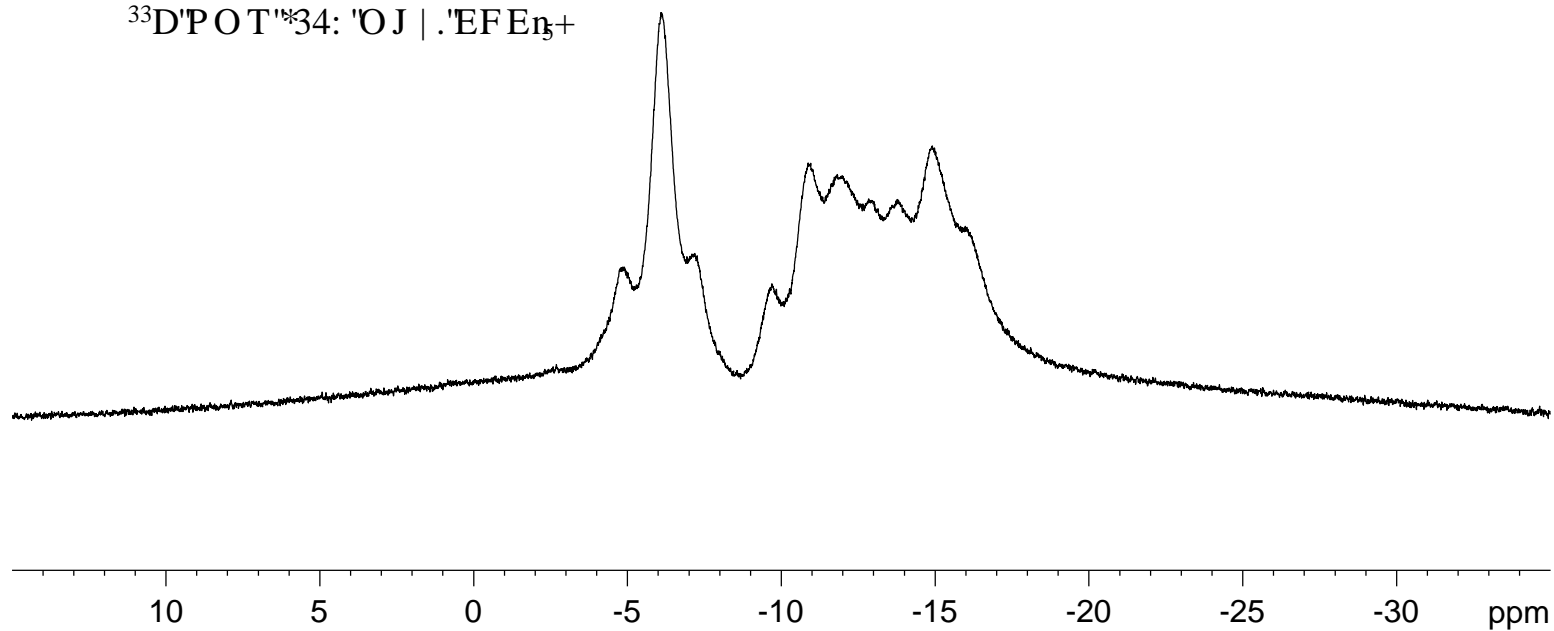

# Thermo QEFMS Analysis Report

## Analysis Info

|               |                                         |                |          |
|---------------|-----------------------------------------|----------------|----------|
| Sample Name : | Lhr-0559                                | Reference No.: | Qzwx140  |
| Instrument :  | Q Exactive Focus Orbitrap               |                |          |
| Source :      | APCI                                    | Polarity :     | Negative |
| Comment :     | APCI neg, 5.0uA, by LC, with sheath gas |                |          |

## Accurate Mass Measurement

|                           |                                                                   |
|---------------------------|-------------------------------------------------------------------|
| Molecular formula :       | C <sub>10</sub> H <sub>21</sub> B <sub>10</sub> NO <sub>3</sub> S |
| Experimental Mass [M-H] : | 342.21726                                                         |
| Theoretical Mass [M-H] :  | 342.21783                                                         |
| Error (ppm) :             | 1.6                                                               |

D:\Raw data\qzwx140\_170310151305

03/10/17 15:14:10

qzwx140\_170310151305 #76 RT: 0.35 AV: 1 SB: 97 0.20-0.34, 0.49-0.78 NL: 1.05E6  
T: FTMS - p APCI corona Full ms [100.0000-800.0000]

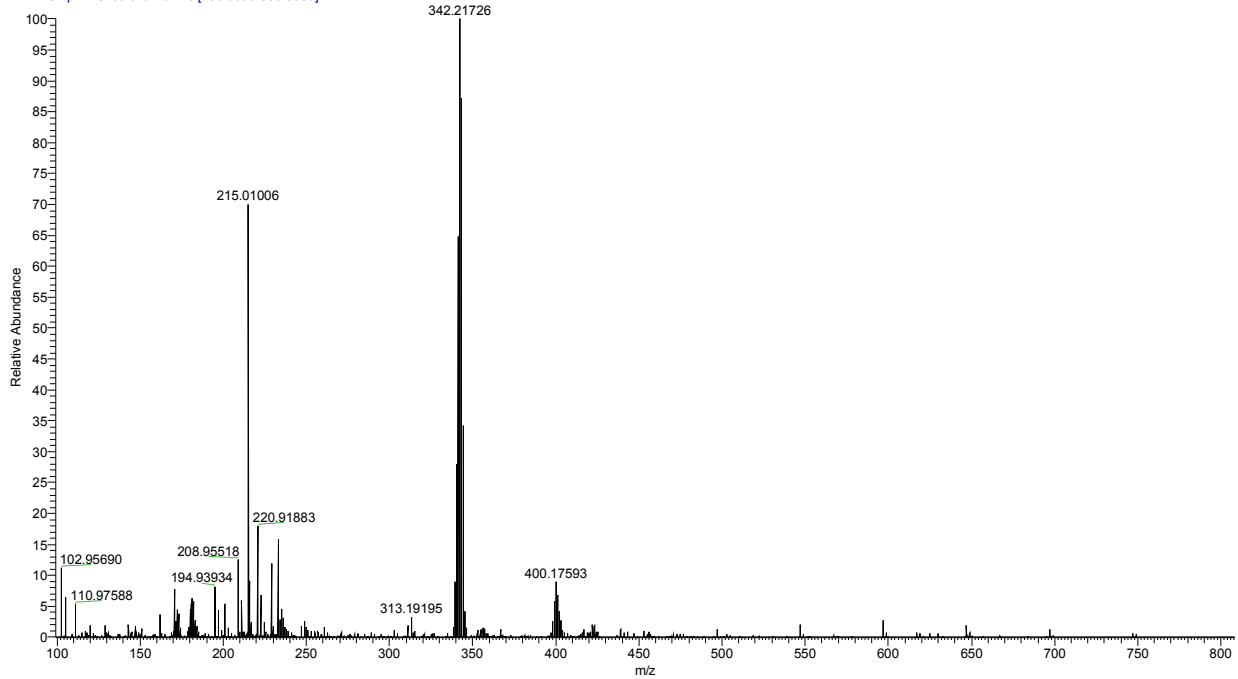

qzwx140\_170310151305 #76 RT: 0.35 AV: 1 SB: 97 0.20-0.34, 0.49-0.78 NL: 1.05E6  
T: FTMS - p APCI corona Full ms [100.0000-800.0000]

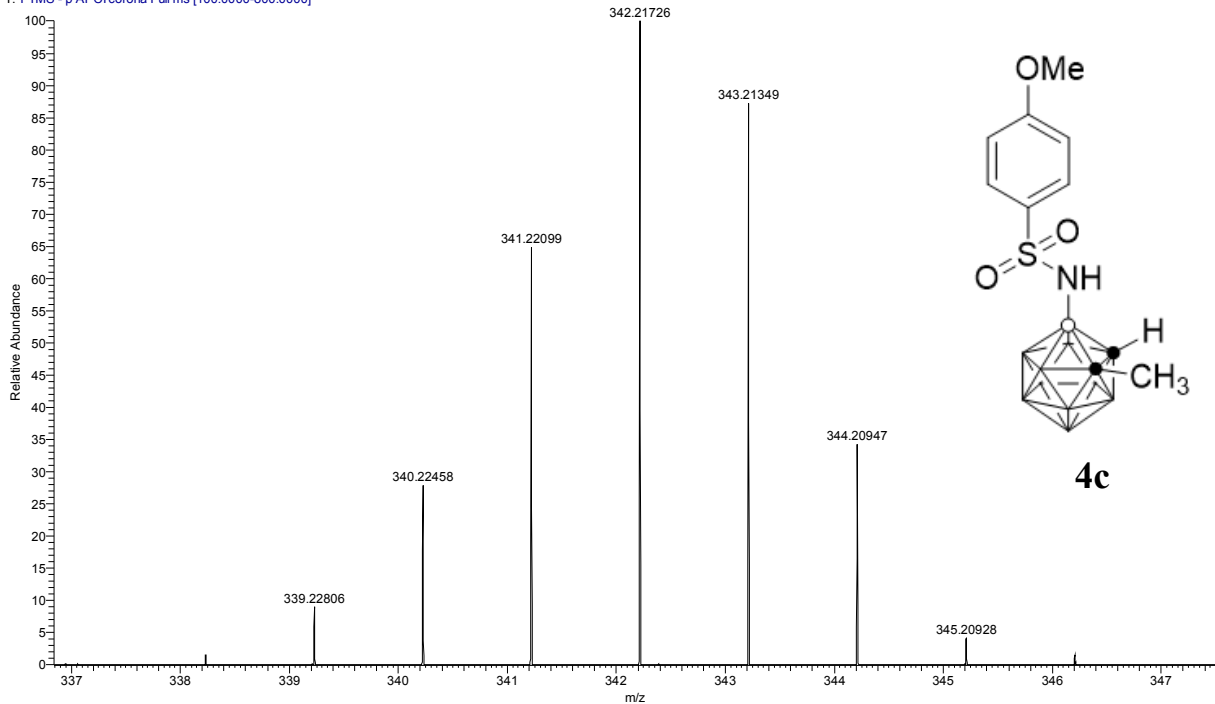

7.889  
7.867  
7.548  
7.526  
7.260

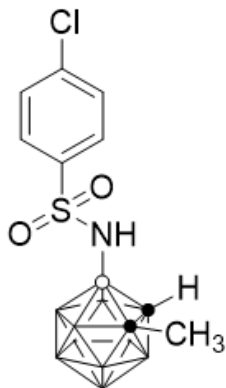

5c

$^3J$  "POT"\*622'OJ | .'EF E<sub>15</sub>+

5.713

4.174

2.079

1.736

1hr-H-0557-10-CDCl3

Current Data Parameters

NAME 1hr-H-0557-10-CDCl3  
EXPNO 1  
PROCNO 1

F2 - Acquisition Parameters

Date\_ 20161221  
Time 13.07 h  
INSTRUM spect  
PROBHD Z108618\_0257 (Z108618)  
PULPROG zg30  
TD 65536  
SOLVENT CDCl3  
NS 8  
DS 2  
SWH 8012.820 Hz  
FIDRES 0.122266 Hz  
AQ 4.0894465 sec  
RG 90.5  
DW 62.400 usec  
DE 6.50 usec  
TE 294.8 K  
D1 1.00000000 sec  
TD0 1  
SFO1 400.2324714 MHz  
NUC1 1H  
P1 12.80 usec  
PLW1 13.56000042 W

F2 - Processing parameters

SI 65536  
SF 400.2300098 MHz  
WDW EM  
SSB 0  
LB 0.30 Hz  
GB 0  
PC 1.00

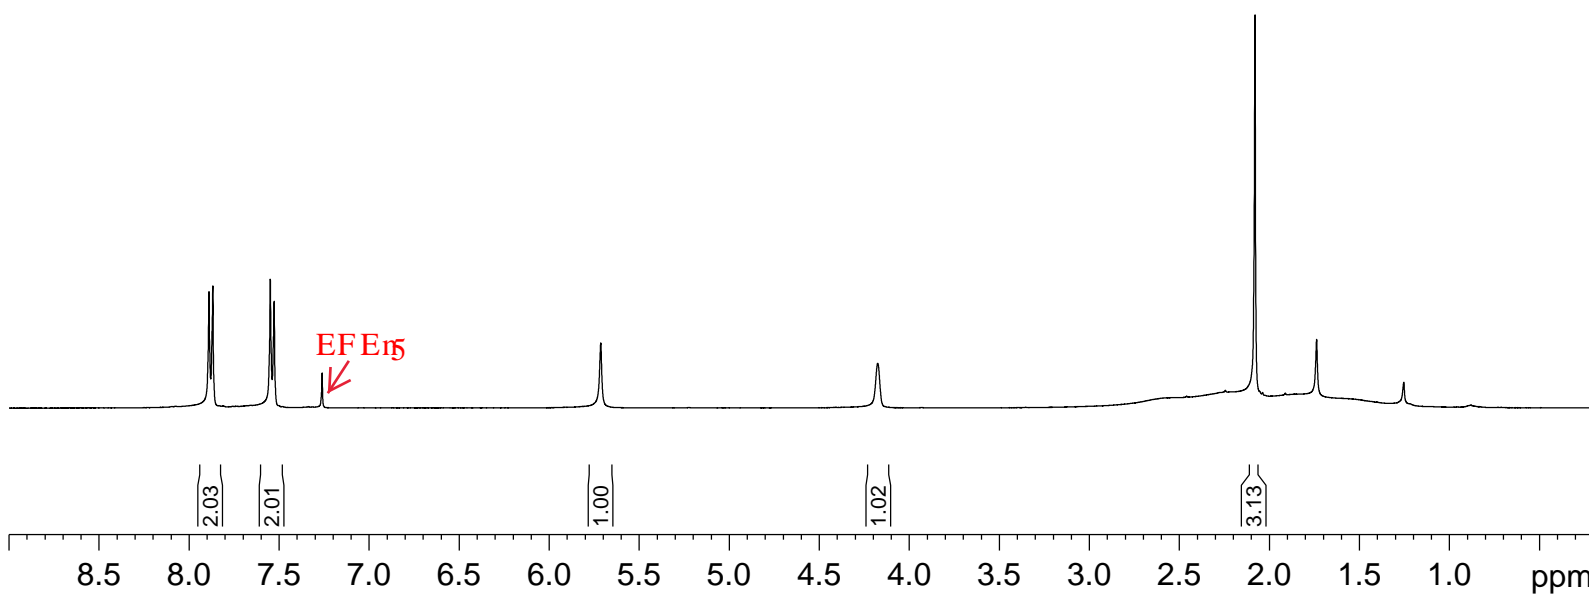

1hr-C-0557-10-cc-CDCl3

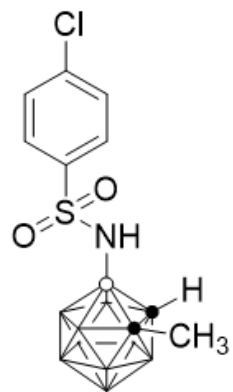

5c

$^{35}\text{E}\}^3\text{J}$  ; 'POT'\*322'OJ | .'EFEn<sub>5</sub>+

139.88  
139.60  
129.71  
128.26

77.48  
77.16  
76.84  
71.74  
60.99

22.95

Current Data Parameters  
NAME lhr-C-0557-10-cc-CDCl3  
EXPNO 1  
PROCNO 1

F2 - Acquisition Parameters  
Date\_ 20161221  
Time 13.10 h  
INSTRUM spect  
PROBHD Z108618\_0257 (  
PULPROG zgpg30  
TD 65536  
SOLVENT CDCl3  
NS 120  
DS 4  
SWH 29761.904 Hz  
FIDRES 0.454131 Hz  
AQ 1.1010048 sec  
RG 203  
DW 16.800 usec  
DE 6.50 usec  
TE 295.2 K  
D1 2.00000000 sec  
D11 0.03000000 sec  
TD0 1  
SFO1 100.6479773 MHz  
NUC1 13C  
P1 9.50 usec  
PLW1 55.34000015 W  
SFO2 400.2316009 MHz  
NUC2 1H  
CPDPRG[2] waltz16  
PCPD2 90.00 usec  
PLW2 13.56000042 W  
PLW12 0.27428001 W  
PLW13 0.13796000 W

F2 - Processing parameters  
SI 32768  
SF 100.6379021 MHz  
WDW EM  
SSB 0  
LB 1.00 Hz  
GB 0  
PC 1.40

EFEn<sub>5</sub>

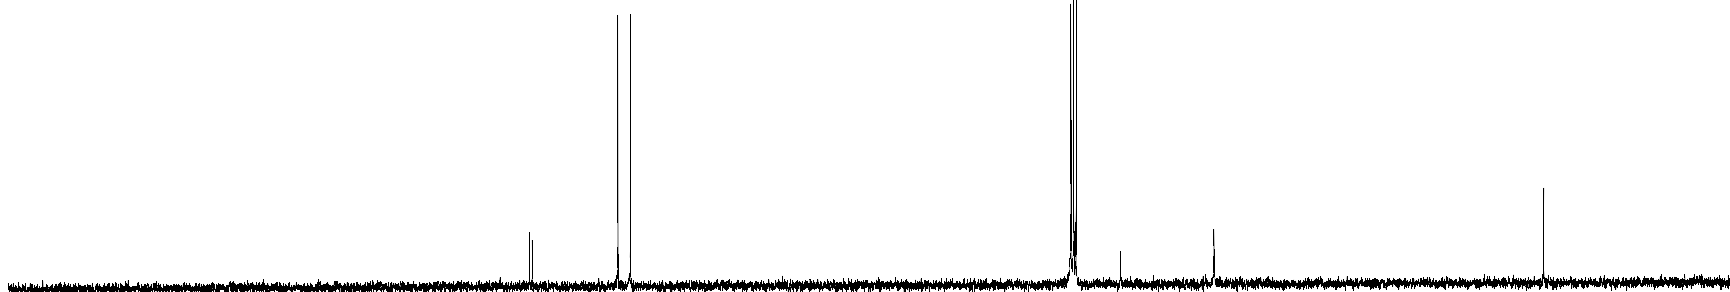

190 180 170 160 150 140 130 120 110 100 90 80 70 60 50 40 30 20 ppm

S43

1hr-B-0557-10-cc-CDCl3

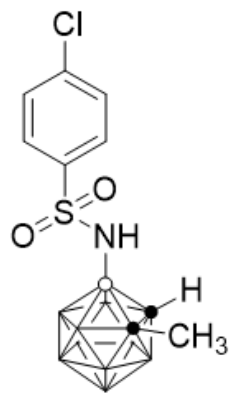

5c

$^{33}\text{D}\}^3\text{J}$  ; 'POT'\*34: 'OJ | .'EF E<sub>5</sub>+

— -4.62  
— -5.90  
  
— -9.69  
— -10.93  
— -11.68  
  
— -13.59  
— -14.43

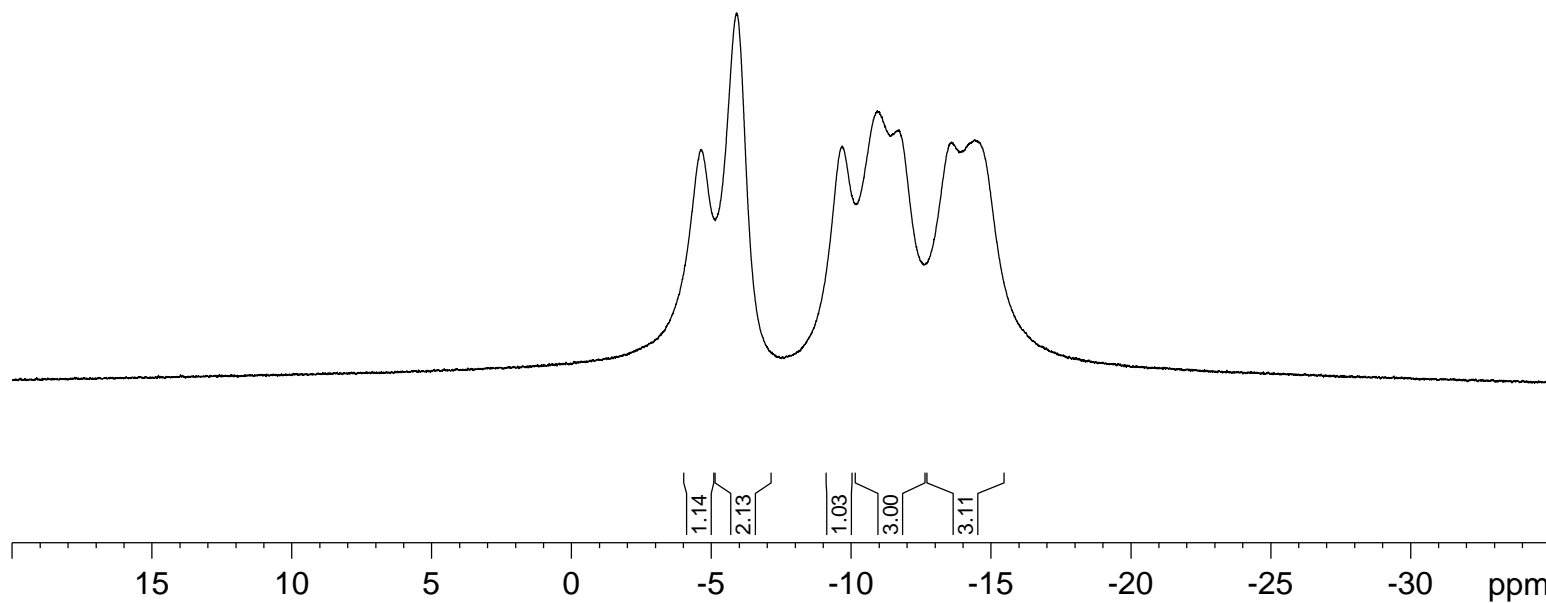

Current Data Parameters  
NAME 1hr-B-0557-10-cc-CDCl3  
EXPNO 1  
PROCNO 1

F2 - Acquisition Parameters  
Date\_ 20161221  
Time 13.00 h  
INSTRUM spect  
PROBHD Z108618\_0257 (  
PULPROG zgdc  
TD 65536  
SOLVENT CDCl3  
NS 39  
DS 4  
SWH 24038.461 Hz  
FIDRES 0.366798 Hz  
AQ 1.3631488 sec  
RG 287  
DW 20.800 usec  
DE 6.50 usec  
TE 295.6 K  
D1 2.0000000 sec  
D11 0.03000000 sec  
TD0 1  
SFO1 128.4096890 MHz  
NUC1 11B  
P1 7.50 usec  
PLW1 55.09999847 W  
SFO2 400.2316009 MHz  
NUC2 1H  
CPDPRG[2] waltz16  
PCPD2 90.00 usec  
PLW2 13.56000042 W  
PLW12 0.27428001 W

F2 - Processing parameters  
SI 32768  
SF 128.4097615 MHz  
WDW EM  
SSB 0  
LB 1.00 Hz  
GB 0  
PC 1.40



1hr-B-0557-10-cc-CDCl3(C)

3.87  
5.25  
5.61  
6.36  
8.94  
10.10  
11.09  
12.30  
13.90  
15.08

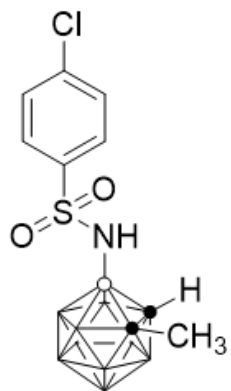

5c

$^{33}\text{D}'\text{POT}^{\text{M}}\text{34: } ^{\text{O}}\text{J} | .^{\text{E}}\text{FEn}_3+$

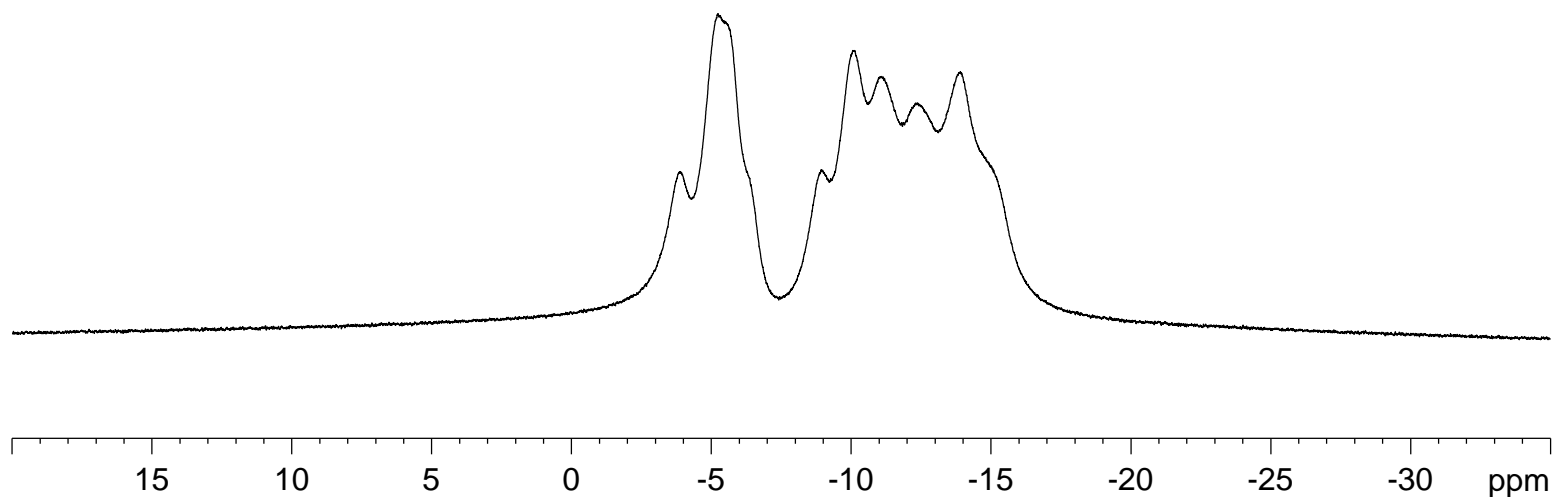

Current Data Parameters  
NAME 1hr-B-0557-10-cc-CDCl3(C)  
EXPNO 1  
PROCNO 1

F2 - Acquisition Parameters  
Date\_ 20161221  
Time 13.02 h  
INSTRUM spect  
PROBHD z108618\_0257 (  
PULPROG zg  
TD 65536  
SOLVENT CDCl3  
NS 24  
DS 2  
SWH 24038.461 Hz  
FIDRES 0.366798 Hz  
AQ 1.3631488 sec  
RG 203  
DW 20.800 usec  
DE 6.50 usec  
TE 295.0 K  
D1 2.00000000 sec  
TD0 1  
SFO1 128.4096890 MHz  
NUC1 11B  
P1 7.50 usec  
PLW1 55.09999847 W

F2 - Processing parameters  
SI 32768  
SF 128.4097430 MHz  
WDW EM  
SSB 0  
LB 1.00 Hz  
GB 0  
PC 1.40



7.980  
7.968  
7.958  
7.946

7.263  
7.260  
7.243  
7.221

5.532

4.194

2.091

1.657

[1hr-H-0558-2-cc-CDC]

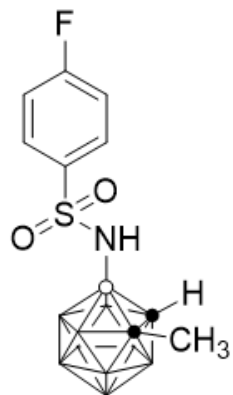

**6c**

$^3J$  'POT'\*622'OJ |.'EF E<sub>3</sub>+

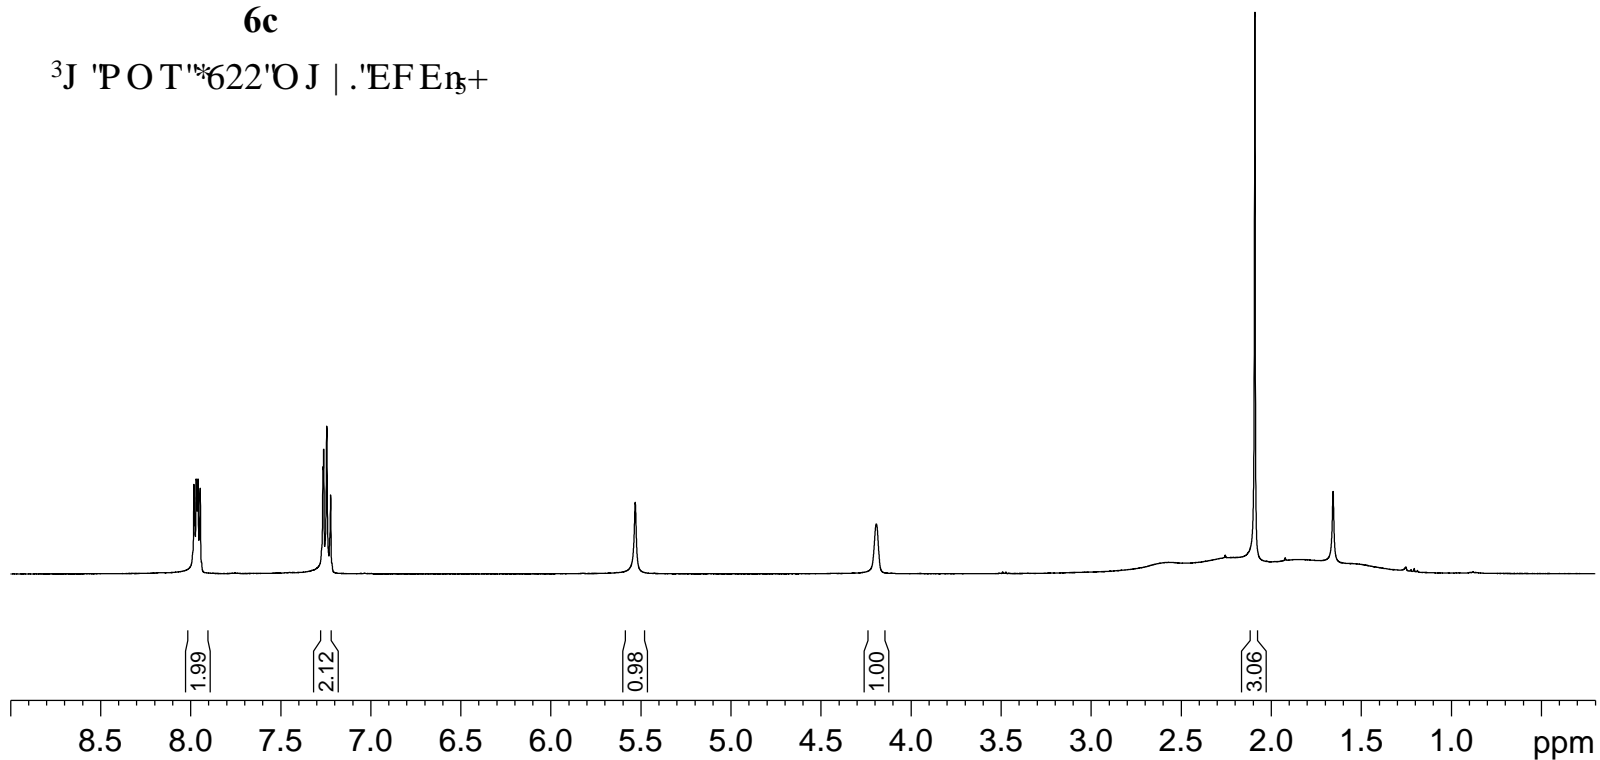

Current Data Parameters  
NAME 1hr-H-0558-2-cc-CDCI3  
EXPNO 1  
PROCNO 1

F2 - Acquisition Parameters

Date\_ 20161218  
Time 17.27 h  
INSTRUM spect  
PROBHD Z108618\_0257 (  
PULPROG zg30  
TD 65536  
SOLVENT CDCl3  
NS 10  
DS 2  
SWH 8012.820 Hz  
FIDRES 0.122266 Hz  
AQ 4.0894465 sec  
RG 80.6  
DW 62.400 usec  
DE 6.50 usec  
TE 295.9 K  
D1 1.00000000 sec  
TD0 1  
SFO1 400.2324714 MHz  
NUC1 1H  
P1 12.80 usec  
PLW1 13.56000042 W

F2 - Processing parameters

SI 65536  
SF 400.2300105 MHz  
WDW EM  
SSB 0  
LB 0.30 Hz  
GB 0  
PC 1.00

lhr-C-0558-2-cc-CDCl

Current Data Parameters  
NAME lhr-C-0558-2-cc-CDCl3  
EXPNO 1  
PROCNO 1

F2 - Acquisition Parameters  
Date\_ 20161218  
Time 17.31 h  
INSTRUM spect  
PROBHD Z108618\_0257 (  
PULPROG zgpg30  
TD 65536  
SOLVENT CDCl3  
NS 1411  
DS 4  
SWH 29761.904 Hz  
FIDRES 0.454131 Hz  
AQ 1.1010048 sec  
RG 181  
DW 16.800 usec  
DE 6.50 usec  
TE 296.3 K  
D1 2.0000000 sec  
D11 0.03000000 sec  
TD0 1  
SFO1 100.6479773 MHz  
NUC1 13C  
P1 9.50 usec  
PLW1 55.34000015 W  
SFO2 400.2316009 MHz  
NUC2 1H  
CPDPRG[2] waltz16  
PCPD2 90.00 usec  
PLW2 13.56000042 W  
PLW12 0.27428001 W  
PLW13 0.13796000 W

F2 - Processing parameters  
SI 32768  
SF 100.6379010 MHz  
WDW EM  
SSB 0  
LB 1.00 Hz  
GB 0  
PC 1.40

166.70  
164.15

137.23  
137.20  
129.66  
129.57

116.80  
116.58

77.48  
77.16  
76.84  
71.77

60.95

22.98

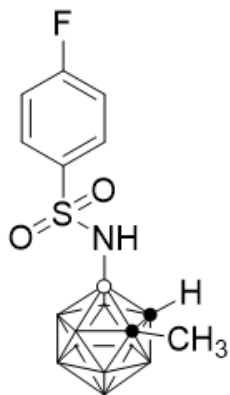

6c

<sup>35</sup>E} <sup>3</sup>J ; "POT" \* 322 "OJ | . "EF E<sub>15</sub> +

EF E<sub>15</sub>

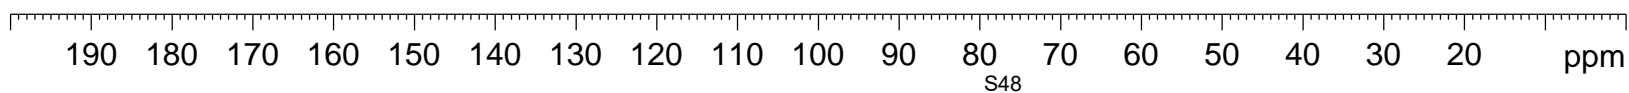

1hr-B-0558-2-cc-CDC13

Current Data Parameters  
NAME 1hr-B-0558-2-cc-CDC13  
EXPNO 1  
PROCNO 1

F2 - Acquisition Parameters  
Date\_ 20161218  
Time 18.47 h  
INSTRUM spect  
PROBHD Z108618\_0257 (  
PULPROG zgdc  
TD 65536  
SOLVENT CDC13  
NS 36  
DS 4  
SWH 24038.461 Hz  
FIDRES 0.366798 Hz  
AQ 1.3631488 sec  
RG 287  
DW 20.800 usec  
DE 6.50 usec  
TE 296.7 K  
D1 2.0000000 sec  
D11 0.0300000 sec  
TD0 1  
SF01 128.4096890 MHz  
NUC1 11B  
P1 7.50 usec  
PLW1 55.09999847 W  
SFO2 400.2316009 MHz  
NUC2 1H  
CPDPRG[2] waltz16  
PCPD2 90.00 usec  
PLW2 13.56000042 W  
PLW12 0.27428001 W

F2 - Processing parameters  
SI 32768  
SF 128.4097615 MHz  
WDW EM  
SSB 0  
LB 1.00 Hz  
GB 0  
PC 1.40

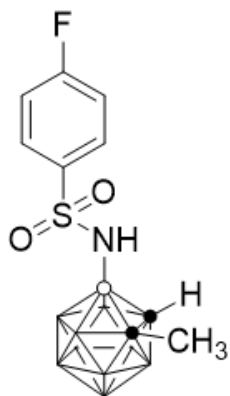

6c

$^{33}\text{D}\}^3\text{J} ; \text{'POT}'^{\#34} : \text{'OJ} | . \text{'EFEN}_3 +$

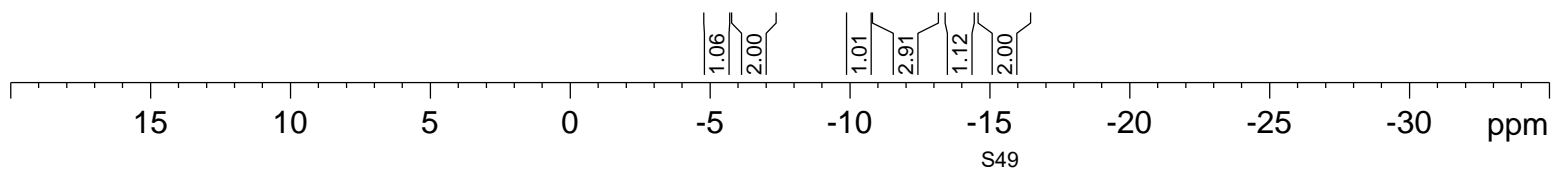

— 5.31 — 6.53 —  
— 10.31 — 11.57 — 12.35 —  
— 14.23 — 15.26 —

1hr-B-0558-2-cc-CDCl3(C)

Current Data Parameters  
NAME 1hr-B-0558-2-cc-CDCl3(C)  
EXPNO 1  
PROCNO 1

F2 - Acquisition Parameters  
Date\_ 20161218  
Time 18.51 h  
INSTRUM spect  
PROBHD Z108618\_0257 (  
PULPROG zg  
TD 65536  
SOLVENT CDCl3  
NS 62  
DS 2  
SWH 24038.461 Hz  
FIDRES 0.366798 Hz  
AQ 1.3631488 sec  
RG 362  
DW 20.800 usec  
DE 6.50 usec  
TE 296.1 K  
D1 2.0000000 sec  
TD0 1  
SF01 128.4096890 MHz  
NUC1 11B  
P1 7.50 usec  
PLW1 55.09999847 W

F2 - Processing parameters  
SI 32768  
SF 128.4097430 MHz  
WDW EM  
SSB 0  
LB 1.00 Hz  
GB 0  
PC 1.40

4.51  
5.86  
6.14  
6.91  
9.57  
10.71  
11.74  
12.89  
13.31  
14.55  
15.72

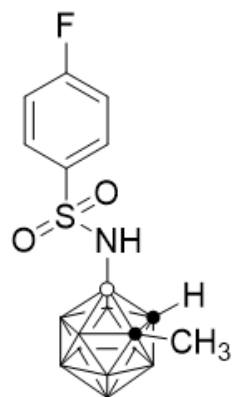

6c

$^{33}\text{D}^{\text{POT}}\text{M}^{\text{34}}\text{:}^{\text{OJ}}\text{|.}^{\text{EFEn}}\text{+}$

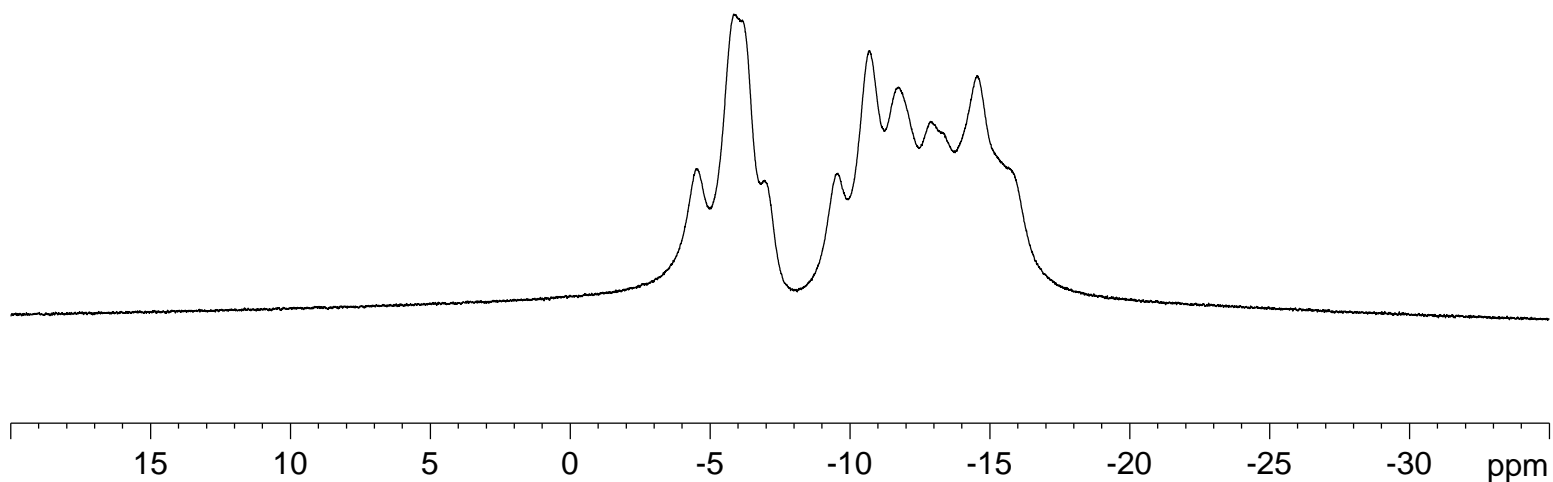

# Thermo QEFMS Analysis Report

## Analysis Info

|               |                                    |                |          |
|---------------|------------------------------------|----------------|----------|
| Sample Name : | Lhr-558                            | Reference No.: | Wqzwx681 |
| Instrument :  | Q Exactive Focus Orbitrap          |                |          |
| Source :      | HESI II                            | Polarity :     | Negative |
| Comment :     | ESI, 3.0kV, by LC, with sheath gas |                |          |

## Accurate Mass Measurement

|                           |                                                                   |
|---------------------------|-------------------------------------------------------------------|
| Molecular formula :       | C <sub>9</sub> B <sub>10</sub> H <sub>18</sub> NO <sub>2</sub> SF |
| Experimental Mass [M-H] : | 330.19750                                                         |
| Theoretical Mass [M-H] :  | 330.19779                                                         |
| Error (ppm) :             | -0.9                                                              |

D:\Raw data\wqzwx681

04/09/19 12:14:48

lhr-558

wqzwx681 #36 RT: 0.34 AV: 1 SB: 49 0.08-0.26, 0.66-1.43 NL: 8.10E7  
T: FTMS - p ESI Full ms [200.0000-1200.0000]

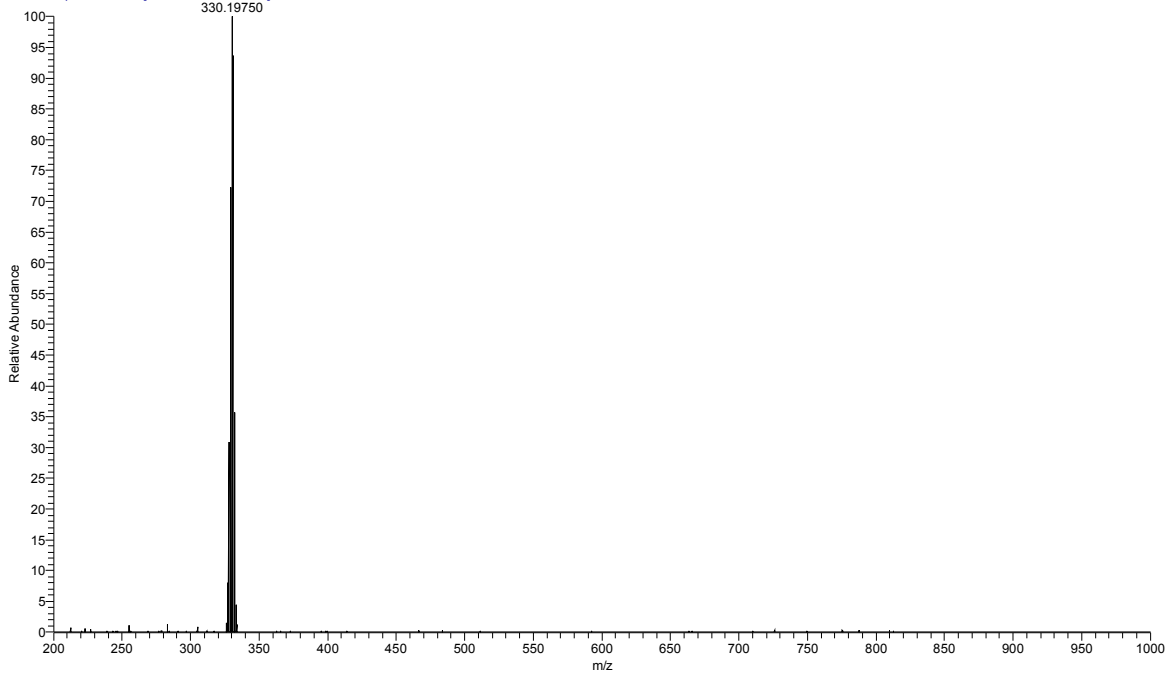

wqzwx681 #36 RT: 0.34 AV: 1 SB: 49 0.08-0.26, 0.66-1.43 NL: 8.10E7  
T: FTMS - p ESI Full ms [200.0000-1200.0000]

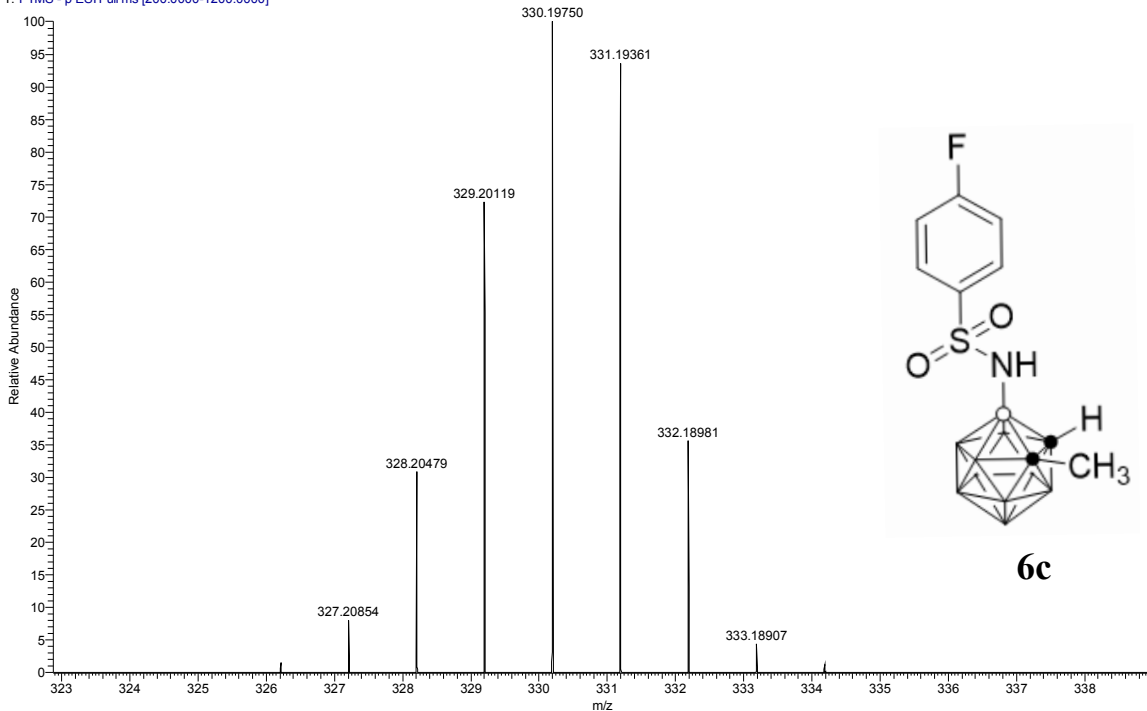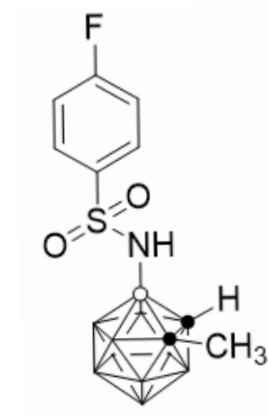

6c

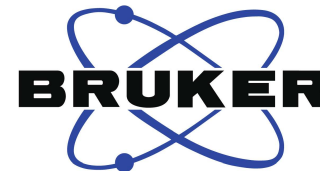

8.493  
8.026  
8.004  
7.992  
7.972  
7.949  
7.934  
7.929  
7.912  
7.908  
7.700  
7.697  
7.683  
7.680  
7.664  
7.659  
7.656  
7.652  
7.635  
7.618  
7.615  
7.260  
5.694

—4.269

—2.114

—1.644

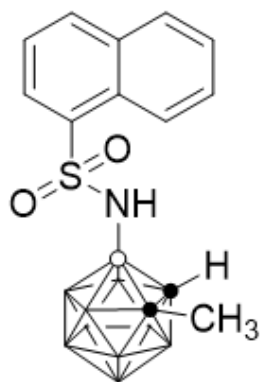

7c

$^3J$  "POT"\*622"OJ | .EF E<sub>15</sub>+

Current Data Parameters  
NAME 1hr-H-0563-cc-CDC13  
EXPNO 1  
PROCNO 1

F2 - Acquisition Parameters  
Date\_ 20161222  
Time 11.46 h  
INSTRUM spect  
PROBHD Z824601\_0021 (  
PULPROG zg30  
TD 65536  
SOLVENT CDC13  
NS 12  
DS 2  
SWH 8012.820 Hz  
FIDRES 0.122266 Hz  
AQ 4.0894465 sec  
RG 203  
DW 62.400 usec  
DE 6.50 usec  
TE 295.8 K  
D1 1.0000000 sec  
TD0 1  
SFO1 400.1324708 MHz  
NUC1 1H  
P1 15.00 usec  
PLW1 8.31000042 W

F2 - Processing parameters  
SI 65536  
SF 400.1300097 MHz  
WDW EM  
SSB 0  
LB 0.30 Hz  
GB 0  
PC 1.00

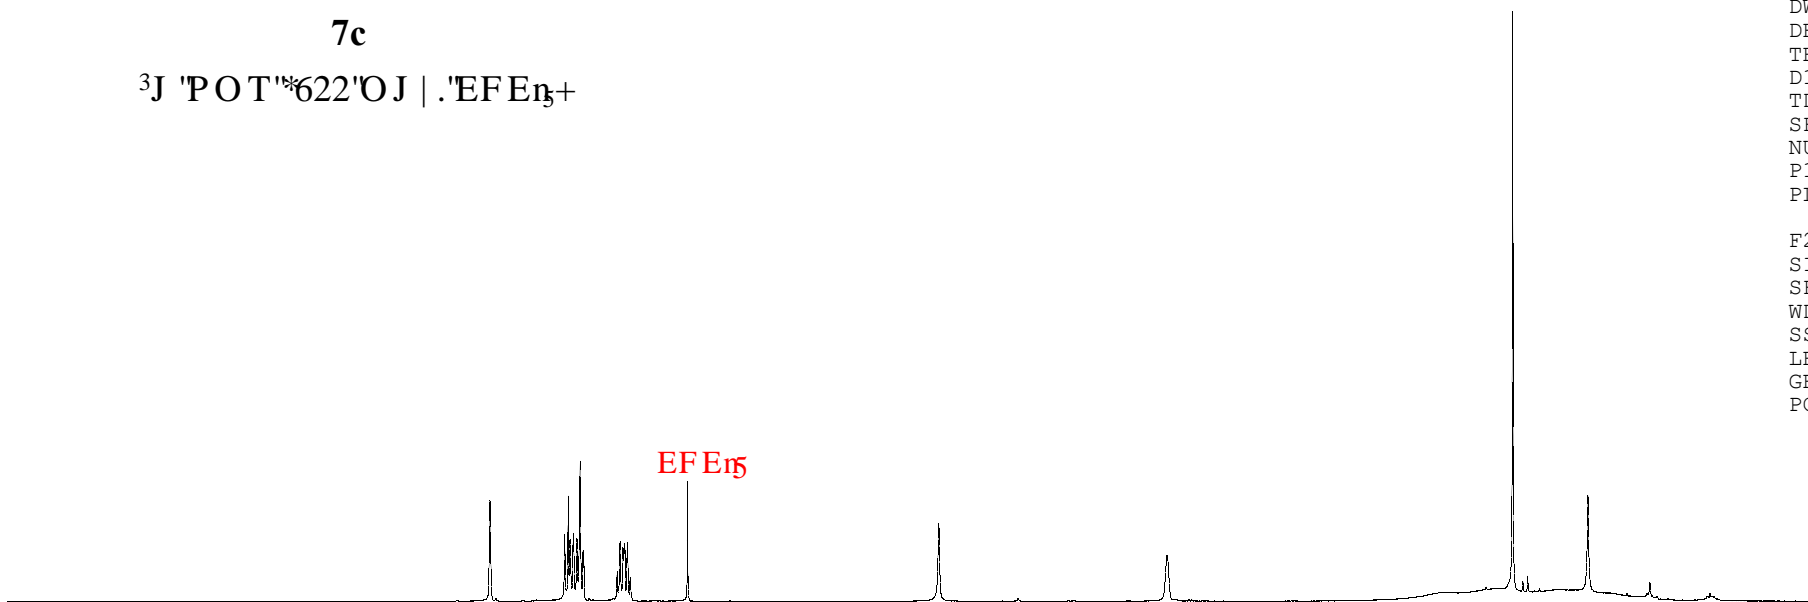

EF E<sub>15</sub>

11 10 9 8 7 6 5 4 3 2 1 ppm

1.00

4.12

2.09

1.00

S52

1.00

3.02



lhr-C-0563-cc-CDC13

Bruker Advance III 400

Current Data Parameters  
NAME lhr-C-0563-cc-CDC13  
EXPNO 1  
PROCNO 1

F2 - Acquisition Parameters  
Date\_ 20161222  
Time 11.48 h  
INSTRUM spect  
PROBHD Z824601\_0021 (  
PULPROG zgpg30  
TD 65536  
SOLVENT CDC13  
NS 970  
DS 4  
SWH 24038.461 Hz  
FIDRES 0.366798 Hz  
AQ 1.3631488 sec  
RG 203  
DW 20.800 usec  
DE 6.50 usec  
TE 295.9 K  
D1 2.0000000 sec  
D11 0.0300000 sec  
TD0 1  
SFO1 100.6228298 MHz  
NUC1 13C  
P1 9.50 usec  
PLW1 41.2500000 W  
SFO2 400.1316005 MHz  
NUC2 1H  
CPDPRG[2] waltz16  
PCPD2 90.00 usec  
PLW2 8.31000042 W  
PLW12 0.23083000 W  
PLW13 0.11611000 W

F2 - Processing parameters  
SI 32768  
SF 100.6127556 MHz  
WDW EM  
SSB 0  
LB 1.00 Hz  
GB 0  
PC 1.40

137.964  
135.109  
132.165  
129.896  
129.492  
129.274  
128.165  
128.154  
127.927  
121.832

77.478  
77.160  
76.843  
71.805

60.945

23.020

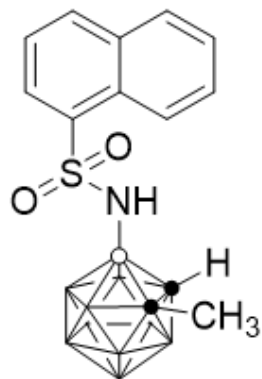

7c

$^{35}\text{E}\}^3\text{J} ; \text{'POT}^*322\text{'OJ} | \text{'EFE}\eta_5+$

EFE $\eta_5$

180 160 140 120 100 80 60 40 20 ppm

S53

1hr-B-0563-cc-CDCl3

Current Data Parameters  
NAME 1hr-B-0563-cc-CDCl3  
EXPNO 1  
PROCNO 1

F2 - Acquisition Parameters  
Date\_ 20161222  
Time 16.33 h  
INSTRUM spect  
PROBHD zgdc  
PULPROG zgdc  
TD 65536  
SOLVENT CDCl3  
NS 27  
DS 4  
SWH 24038.461 Hz  
FIDRES 0.366798 Hz  
AQ 1.3631488 sec  
RG 287  
DW 20.800 usec  
DE 6.50 usec  
TE 295.4 K  
D1 2.0000000 sec  
D11 0.0300000 sec  
TD0 1  
SFO1 128.4096890 MHz  
NUC1 11B  
P1 7.50 usec  
PLW1 55.09999847 W  
SFO2 400.2316009 MHz  
NUC2 1H  
CPDPRG[2] waltz16  
PCPD2 90.00 usec  
PLW2 13.56000042 W  
PLW12 0.27428001 W

F2 - Processing parameters  
SI 32768  
SF 128.4097615 MHz  
WDW EM  
SSB 0  
LB 1.00 Hz  
GB 0  
PC 1.40

5.33  
6.25  
10.16  
11.58  
12.12  
14.25  
15.20

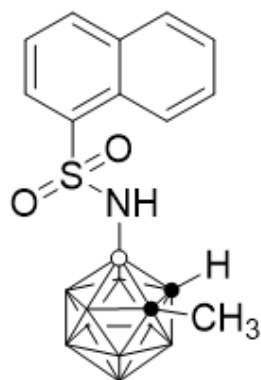

7c

$^{33}\text{D}\}^3\text{J} ; \text{'POT}^*34: \text{'OJ} | \text{'EFE}n_3+$

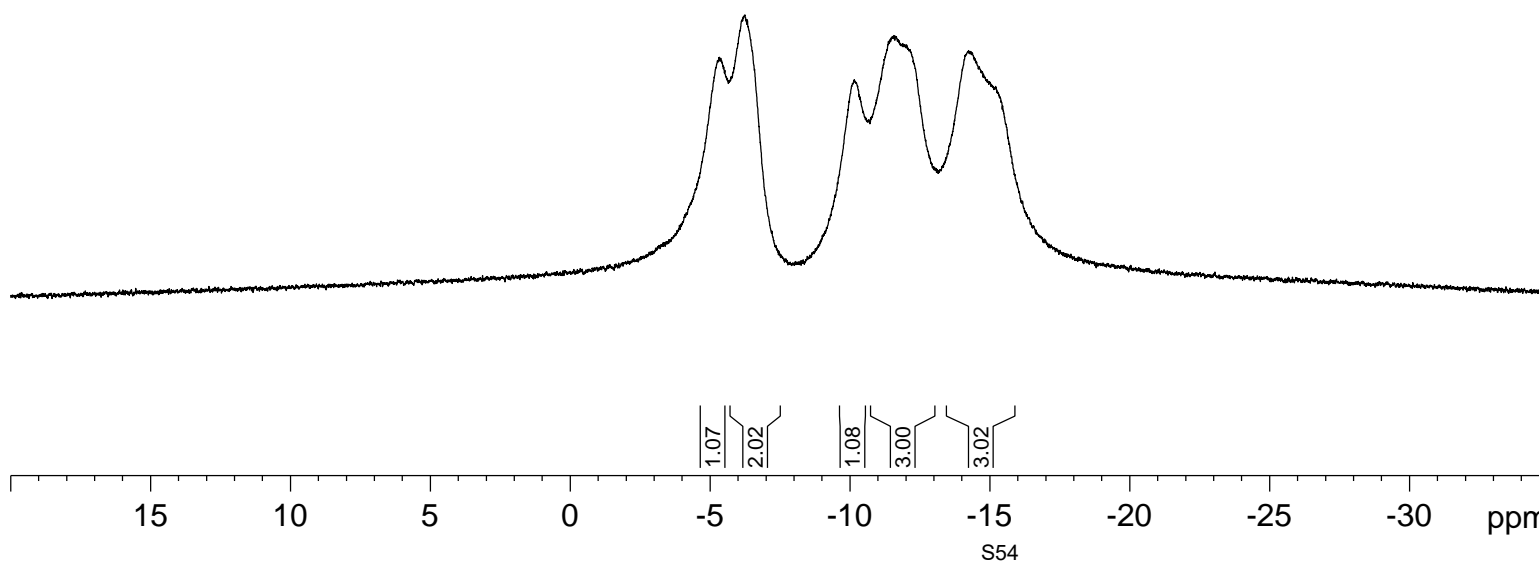

1hr-B-0563-cc-CDCl3(C)

Current Data Parameters  
NAME 1hr-B-0563-cc-CDCl3(C)  
EXPNO 1  
PROCNO 1

F2 - Acquisition Parameters  
Date\_ 20161222  
Time 16.35 h  
INSTRUM spect  
PROBHD Z108618\_0257 (  
PULPROG zg  
TD 65536  
SOLVENT CDCl3  
NS 34  
DS 2  
SWH 24038.461 Hz  
FIDRES 0.366798 Hz  
AQ 1.3631488 sec  
RG 362  
DW 20.800 usec  
DE 6.50 usec  
TE 295.0 K  
D1 2.0000000 sec  
TD0 1  
SFO1 128.4096890 MHz  
NUC1 11B  
P1 7.50 usec  
PLW1 55.09999847 W

F2 - Processing parameters  
SI 32768  
SF 128.4097504 MHz  
WDW EM  
SSB 0  
LB 1.00 Hz  
GB 0  
PC 1.40

4.65  
5.89  
7.00  
9.50  
10.64  
11.61  
12.74  
13.48  
14.61  
15.75

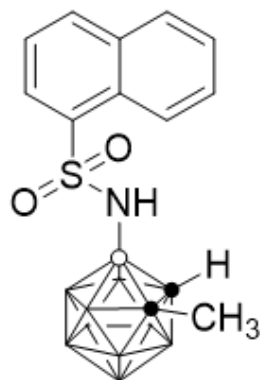

7c

$^{33}\text{D}'\text{POT}^{\#34}: \text{'OJ} | \text{'EFEn}_3+$

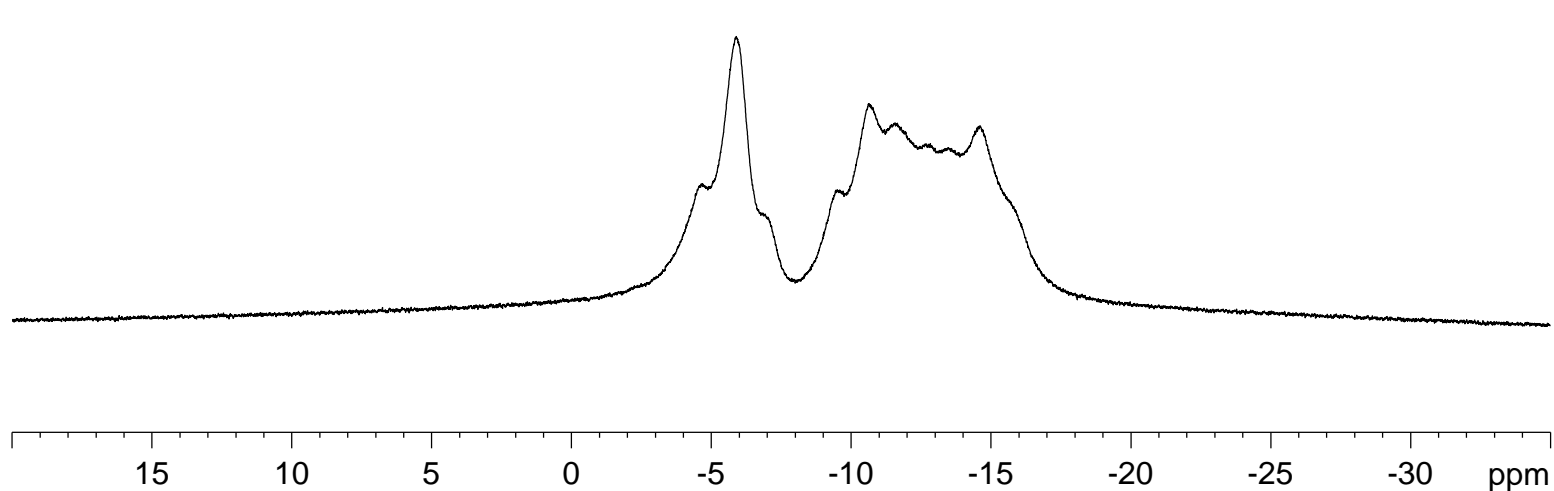

# Thermo QEFMS Analysis Report

## Analysis Info

|               |                                        |                |          |
|---------------|----------------------------------------|----------------|----------|
| Sample Name : | Lhr-0577                               | Reference No.: | Qzwx148  |
| Instrument :  | Q Exactive Focus Orbitrap              |                |          |
| Source :      | HESI II                                | Polarity :     | Positive |
| Comment :     | ESI pos, 3.5kV, by LC, with sheath gas |                |          |

## Accurate Mass Measurement

|                                         |                                                                   |
|-----------------------------------------|-------------------------------------------------------------------|
| Molecular formula :                     | C <sub>13</sub> H <sub>21</sub> B <sub>10</sub> NO <sub>2</sub> S |
| Experimental Mass [M+Na] <sup>+</sup> : | 386.21886                                                         |
| Theoretical Mass [M+Na] <sup>+</sup> :  | 386.21955                                                         |
| Error (ppm) :                           | 1.7                                                               |

D:\Raw data\qzwx148

03/09/17 17:30:28

qzwx148 #78 RT: 0.35 AV: 1 SB: 159 0.12-0.30 , 0.49-1.01 NL: 5.28E6  
T: FTMS + p ESI Full ms [120.0000-1000.0000]

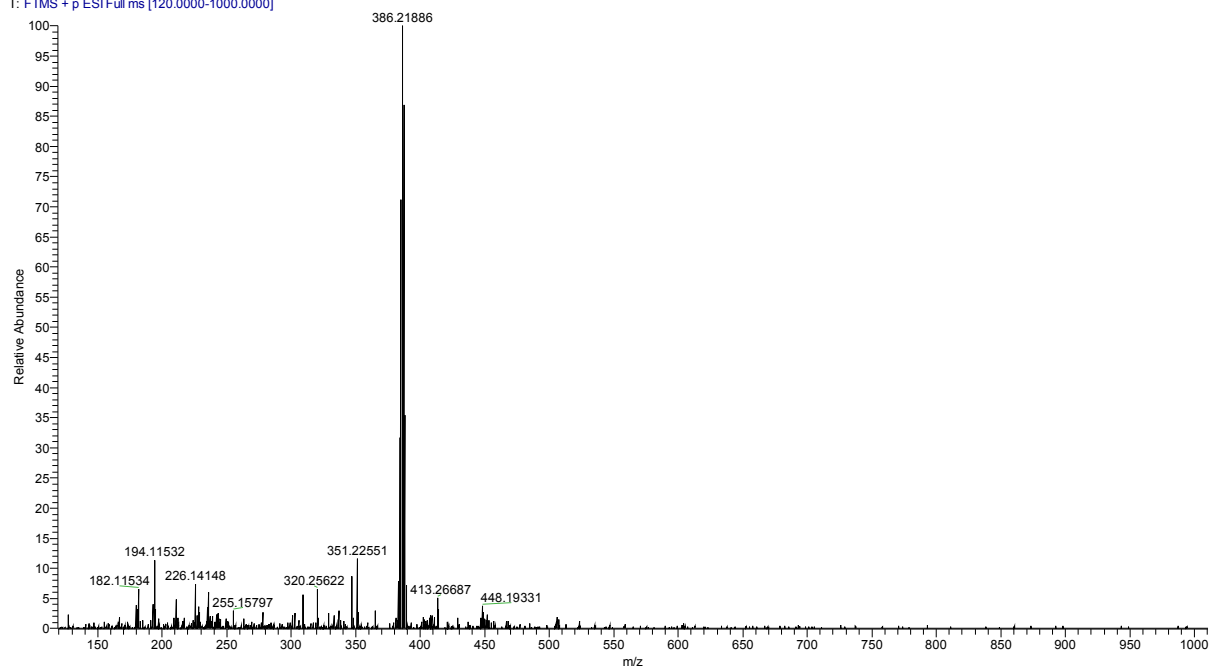

qzwx148 #78 RT: 0.35 AV: 1 SB: 159 0.12-0.30 , 0.49-1.01 NL: 5.28E6  
T: FTMS + p ESI Full ms [120.0000-1000.0000]

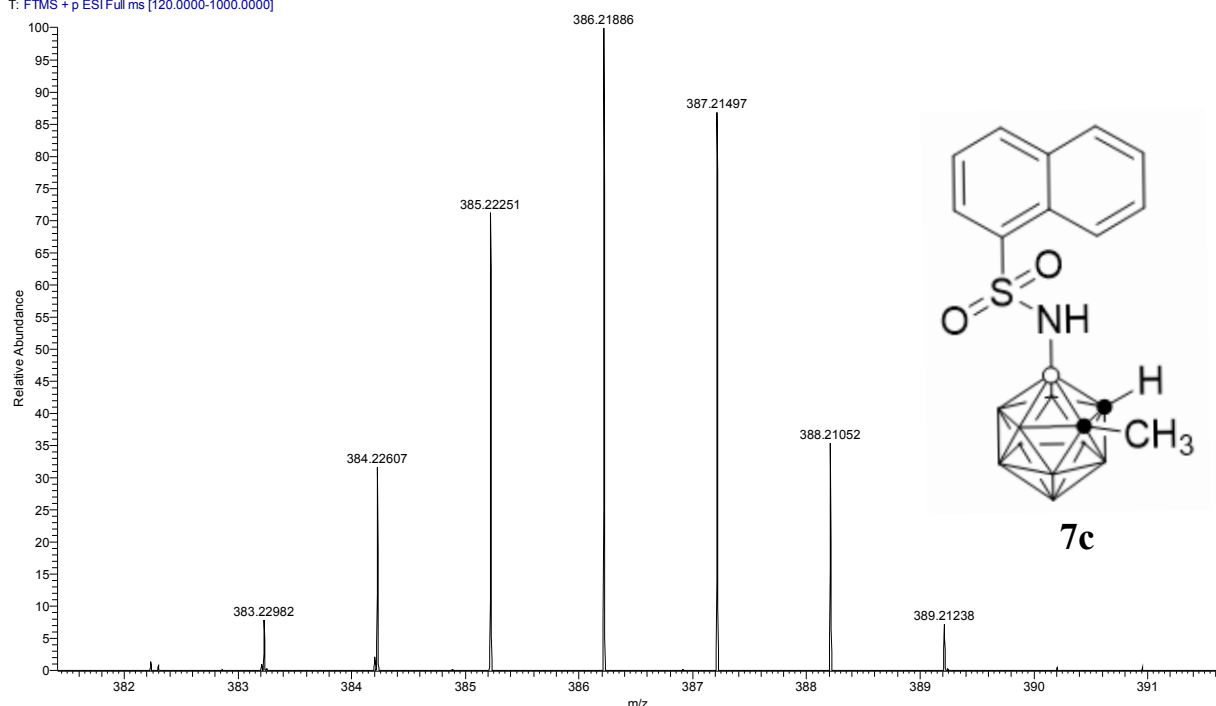

lhr-H-0579-cc-CDCl3

Bruker Advance III 400

Current Data Parameters  
NAME lhr-H-0579-cc-CDCl3  
EXPNO 1  
PROCNO 1

F2 - Acquisition Parameters  
Date\_ 20170104  
Time 12.33 h  
INSTRUM spect  
PROBHD z824601\_0021 (  
PULPROG zg30  
TD 65536  
SOLVENT CDCl3  
NS 12  
DS 2  
SWH 8012.820 Hz  
FIDRES 0.122266 Hz  
AQ 4.0894465 sec  
RG 203  
DW 62.400 usec  
DE 6.50 usec  
TE 295.1 K  
D1 1.0000000 sec  
TD0 1  
SFO1 400.1324708 MHz  
NUC1 1H  
P1 15.00 usec  
PLW1 8.31000042 W

F2 - Processing parameters  
SI 65536  
SF 400.1300096 MHz  
WDW EM  
SSB 0  
LB 0.30 Hz  
GB 0  
PC 1.00

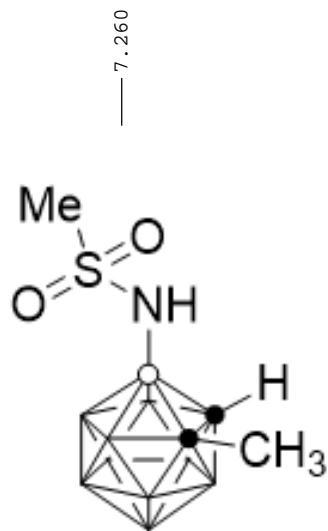

8c

<sup>3</sup>J 'POT'\*622'OJ | .'EFE<sub>n</sub>+

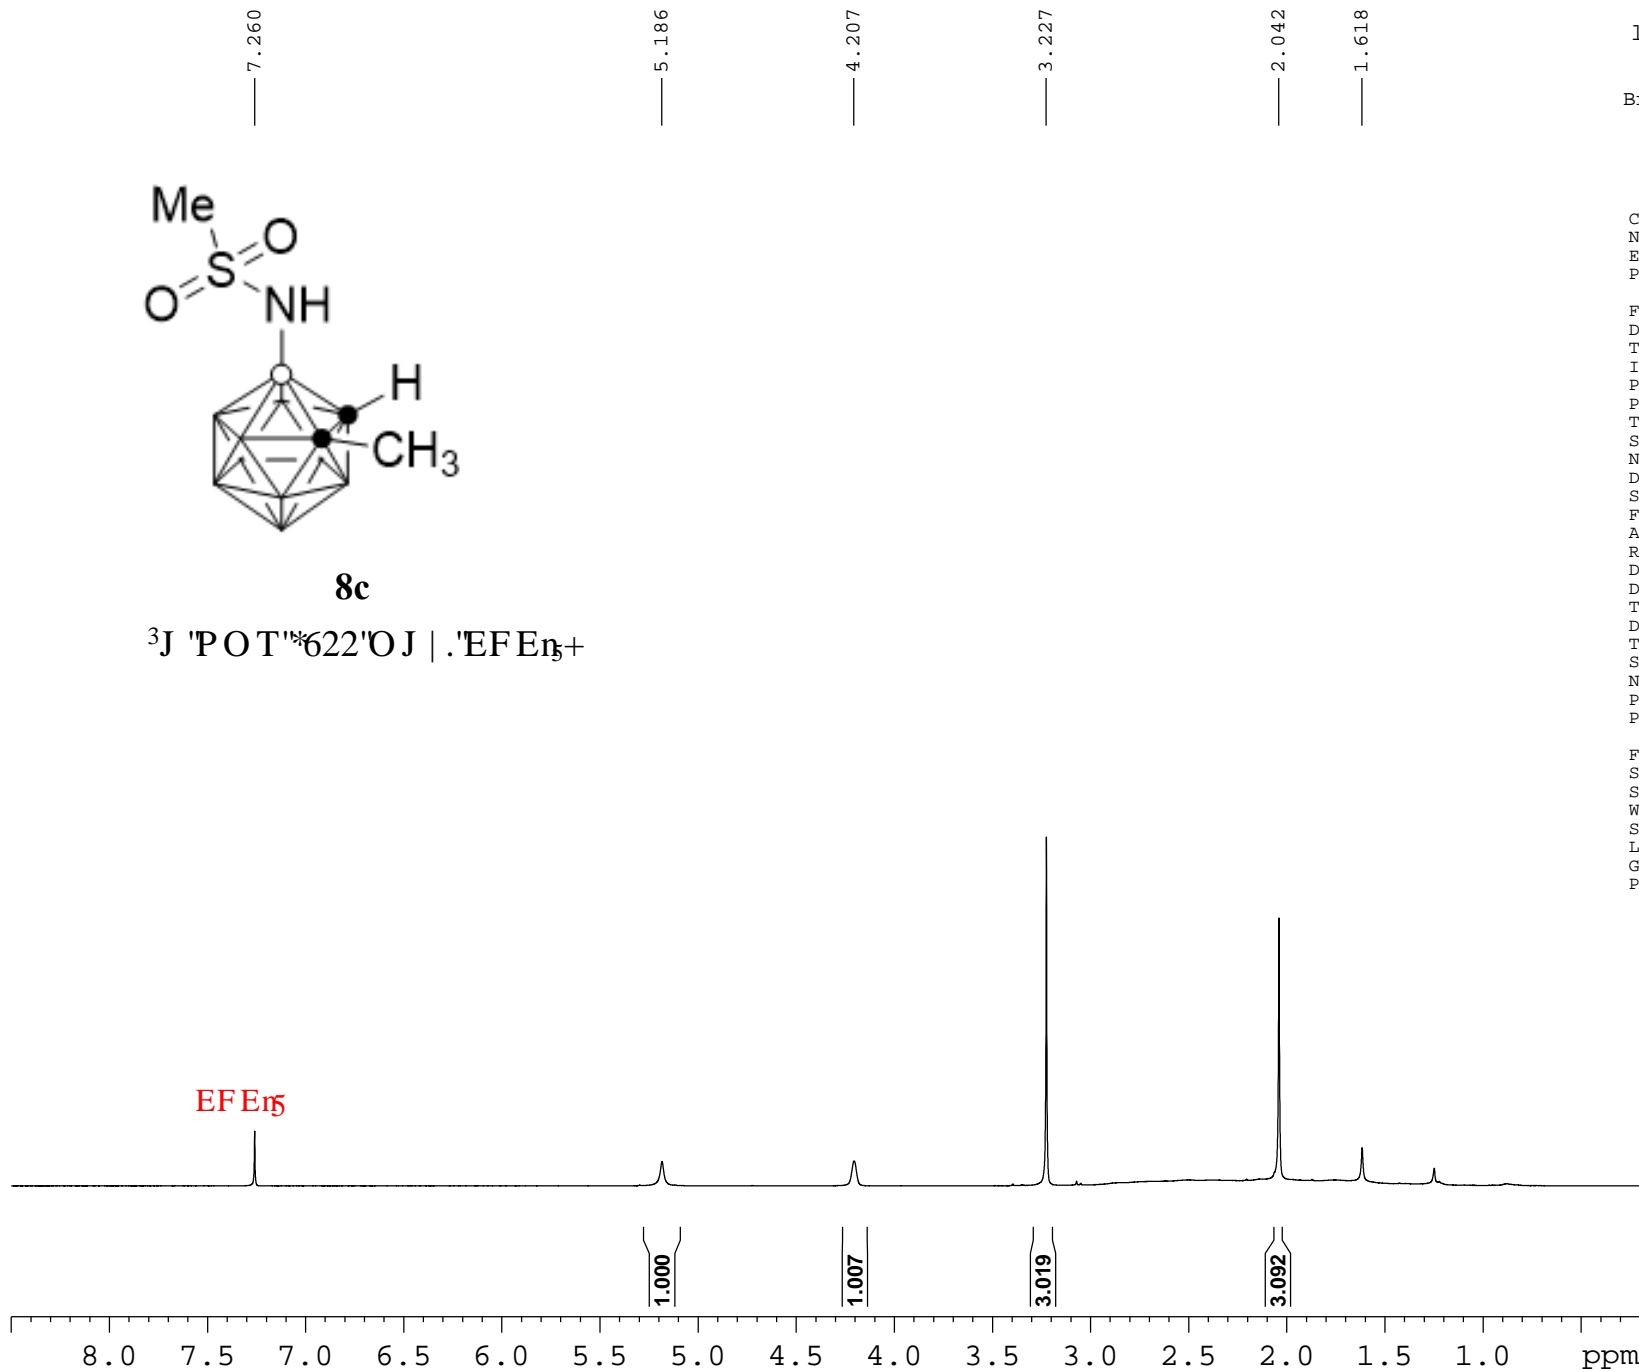

Bruker Advance III 400

Current Data Parameters  
 NAME lhr-C-0579-cc-CDC13  
 EXPNO 2  
 PROCNO 1

F2 - Acquisition Parameters  
 Date\_ 20170105  
 Time 12.35 h  
 INSTRUM spect  
 PROBHD Z824601\_0021 (  
 PULPROG zgpg30  
 TD 65536  
 SOLVENT CDC13  
 NS 1000  
 DS 4  
 SWH 24038.461 Hz  
 FIDRES 0.366798 Hz  
 AQ 1.3631488 sec  
 RG 203  
 DW 20.800 usec  
 DE 6.50 usec  
 TE 296.5 K  
 D1 2.0000000 sec  
 D11 0.0300000 sec  
 TD0 1  
 SFO1 100.6228298 MHz  
 NUC1 13C  
 P1 9.50 usec  
 PLW1 41.2500000 W  
 SFO2 400.1316005 MHz  
 NUC2 1H  
 CPDPRG[2] waltz16  
 PCPD2 90.00 usec  
 PLW2 8.31000042 W  
 PLW12 0.23083000 W  
 PLW13 0.11611000 W

F2 - Processing parameters  
 SI 32768  
 SF 100.6127558 MHz  
 WDW EM  
 SSB 0  
 LB 1.00 Hz  
 GB 0  
 PC 1.40

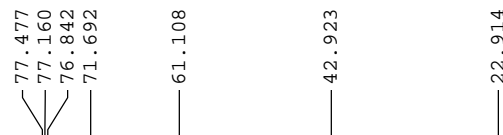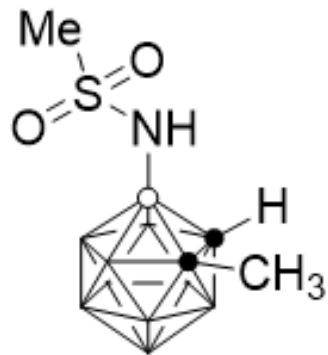

8c

$^{35}\text{E}\}^3\text{J} ; \text{'POT}'^*322'\text{OJ} | .'\text{E}\text{F}\text{E}\text{E}_5+$

EFE<sub>5</sub>

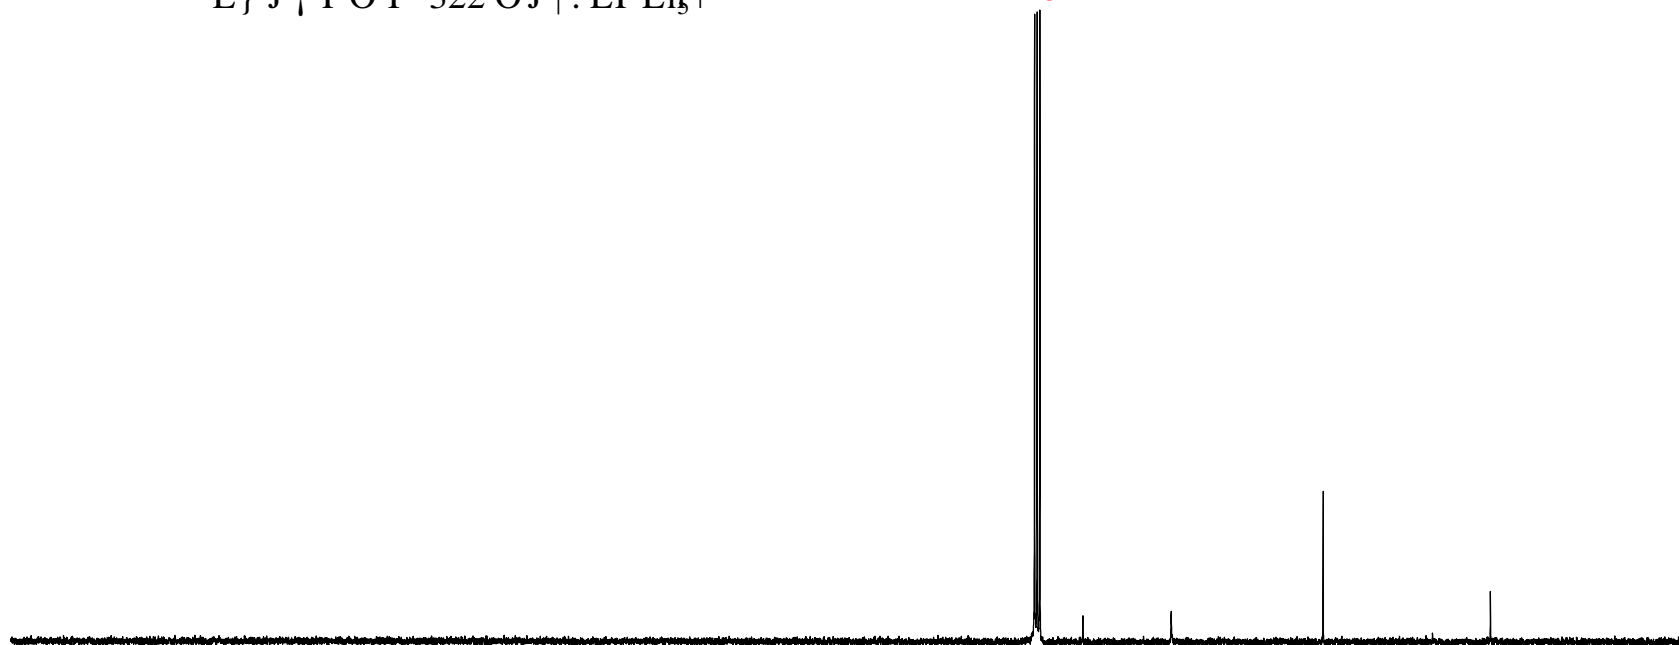

180 160 140 120 100 80 60 40 20 ppm

lhr-B-0579-cc-CDCl3

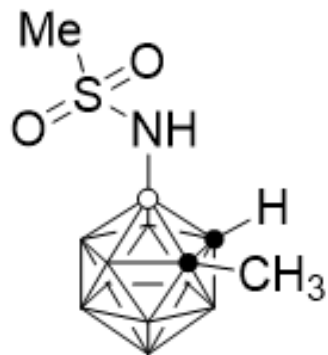

8c

<sup>33</sup>D} <sup>3</sup>J ; 'POT' 34: 'OJ | .'EFEn<sub>3</sub>+

4.54  
5.67  
9.35  
10.81  
11.74  
13.64  
14.01  
14.51

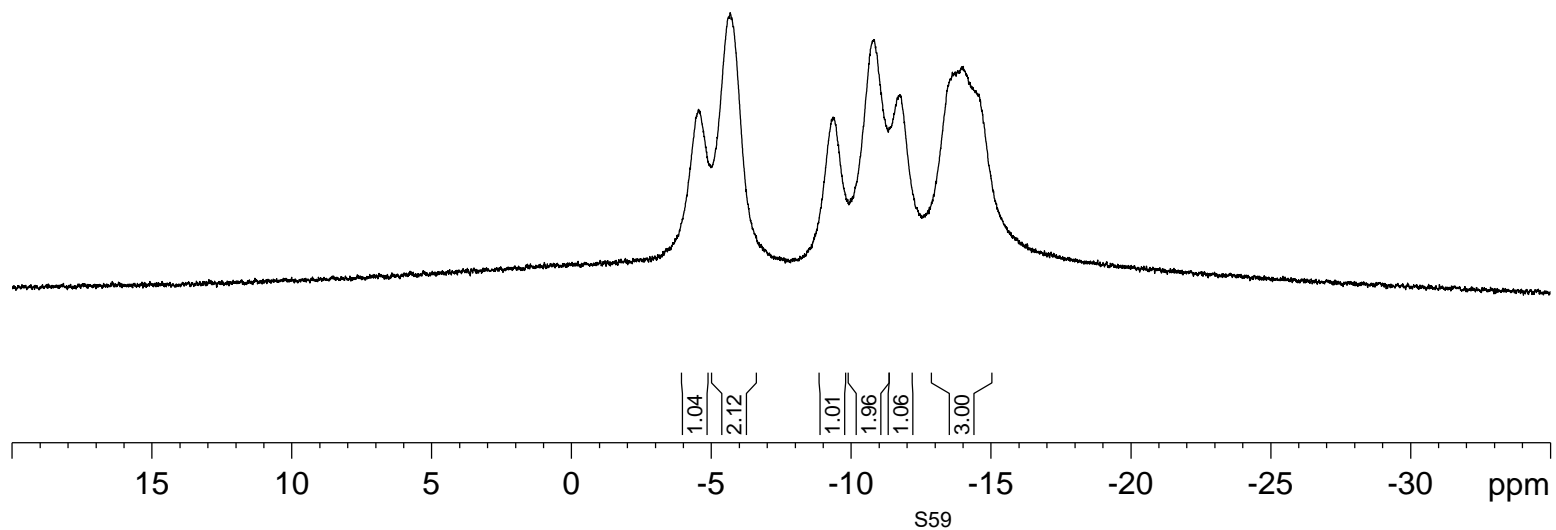

Current Data Parameters  
NAME lhr-B-0579-cc-CDCl3  
EXPNO 1  
PROCNO 1

F2 - Acquisition Parameters  
Date\_ 20170103  
Time 22.01 h  
INSTRUM spect  
PROBHD Z108618\_0257 (  
PULPROG zgdc  
TD 65536  
SOLVENT CDCl3  
NS 12  
DS 4  
SWH 24038.461 Hz  
FIDRES 0.366798 Hz  
AQ 1.3631488 sec  
RG 203  
DW 20.800 usec  
DE 6.50 usec  
TE 294.9 K  
D1 2.00000000 sec  
D11 0.03000000 sec  
TD0 1  
SFO1 128.4096890 MHz  
NUC1 11B  
P1 7.50 usec  
PLW1 55.09999847 W  
SFO2 400.2316009 MHz  
NUC2 1H  
CPDPRG[2] waltz16  
PCPD2 90.00 usec  
PLW2 13.56000042 W  
PLW12 0.27428001 W

F2 - Processing parameters  
SI 32768  
SF 128.4097615 MHz  
WDW EM  
SSB 0  
LB 1.00 Hz  
GB 0  
PC 1.40

1hr-B-0579-cc-CDCl3(C)

Current Data Parameters  
NAME 1hr-B-0579-cc-CDCl3(C)  
EXPNO 1  
PROCNO 1

F2 - Acquisition Parameters  
Date\_ 20170103  
Time 22.04 h  
INSTRUM spect  
PROBHD Z108618\_0257 (  
PULPROG zg  
TD 65536  
SOLVENT CDCl3  
NS 34  
DS 2  
SWH 24038.461 Hz  
FIDRES 0.366798 Hz  
AQ 1.3631488 sec  
RG 362  
DW 20.800 usec  
DE 6.50 usec  
TE 294.6 K  
D1 2.00000000 sec  
TD0 1  
SFO1 128.4096890 MHz  
NUC1 11B  
P1 7.50 usec  
PLW1 55.09999847 W

F2 - Processing parameters  
SI 32768  
SF 128.4097504 MHz  
WDW EM  
SSB 0  
LB 1.00 Hz  
GB 0  
PC 1.40

— 3.83  
— 5.24  
— 6.26  
  
— 8.66  
— 9.90  
— 11.14  
— 12.30  
— 12.78  
— 13.90  
— 14.51  
— 15.06

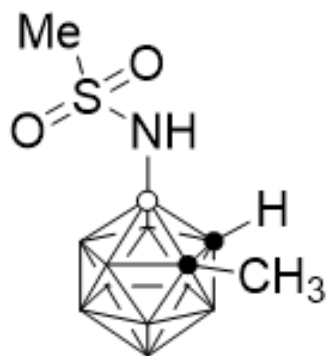

8c

$^{33}\text{D}'\text{POT}^{\#34}: \text{'OJ} | \text{'EFEN}_3+$

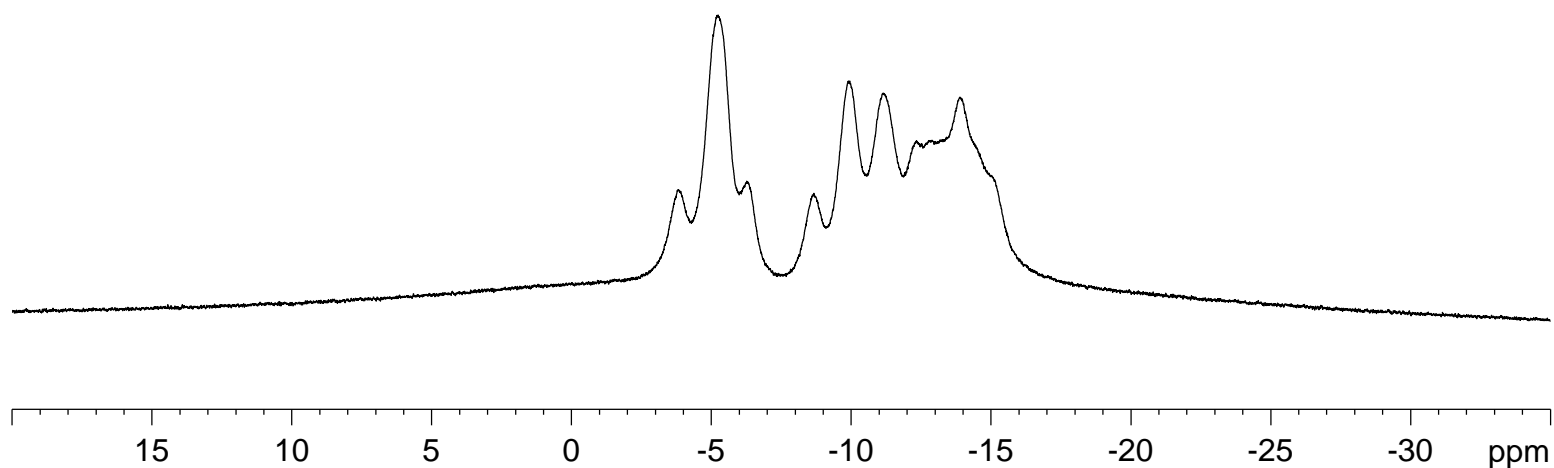



# Thermo QEFMS Analysis Report

## Analysis Info

|               |                                         |                |          |
|---------------|-----------------------------------------|----------------|----------|
| Sample Name : | Lhr-0579                                | Reference No.: | Qzwx147  |
| Instrument :  | Q Exactive Focus Orbitrap               |                |          |
| Source :      | APCI                                    | Polarity :     | Negative |
| Comment :     | APCI neg, 5.0uA, by LC, with sheath gas |                |          |

## Accurate Mass Measurement

|                                        |                                                                  |
|----------------------------------------|------------------------------------------------------------------|
| Molecular formula :                    | C <sub>4</sub> H <sub>17</sub> B <sub>10</sub> NO <sub>2</sub> S |
| Experimental Mass [M-H] <sup>-</sup> : | 250.19113                                                        |
| Theoretical Mass [M-H] <sup>-</sup> :  | 250.19132                                                        |
| Error (ppm) :                          | 0.7                                                              |

D:\Raw data\qzwx147\_170310155609

03/10/17 15:57:14

qzwx147\_170310155609 #84 RT: 0.38 AV: 1 NL: 4.06E7  
T: FTMS - p APCI corona Full ms [100.0000-800.0000]

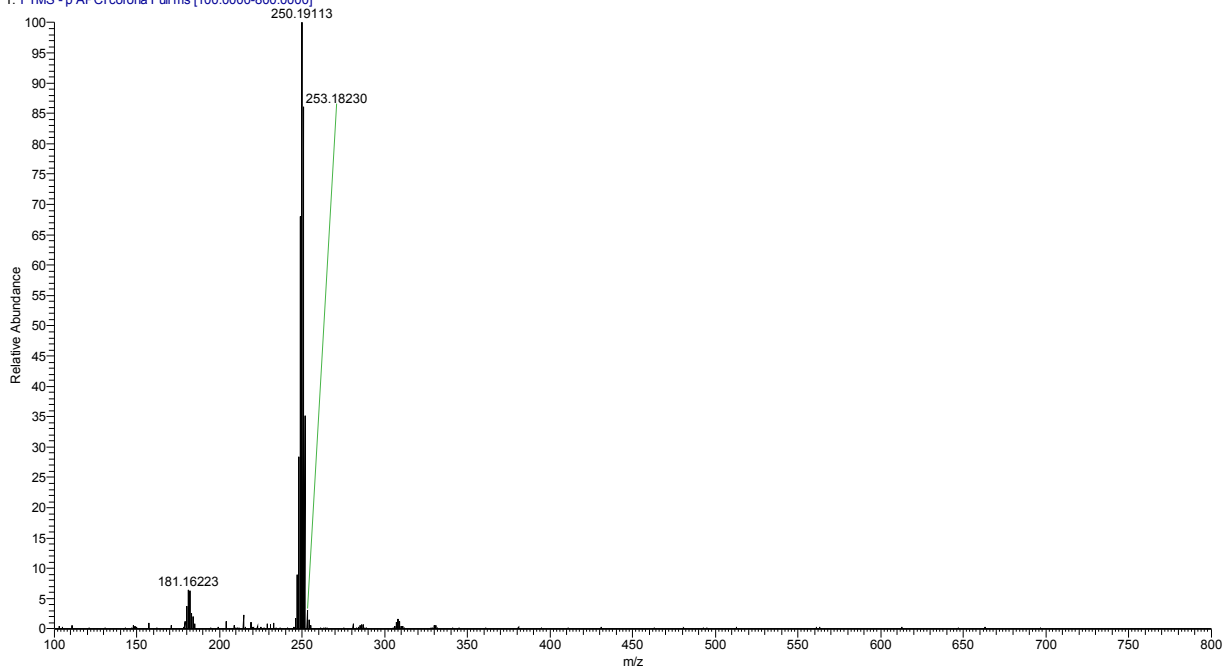

qzwx147\_170310155609 #84 RT: 0.38 AV: 1 NL: 4.06E7  
T: FTMS - p APCI corona Full ms [100.0000-800.0000]

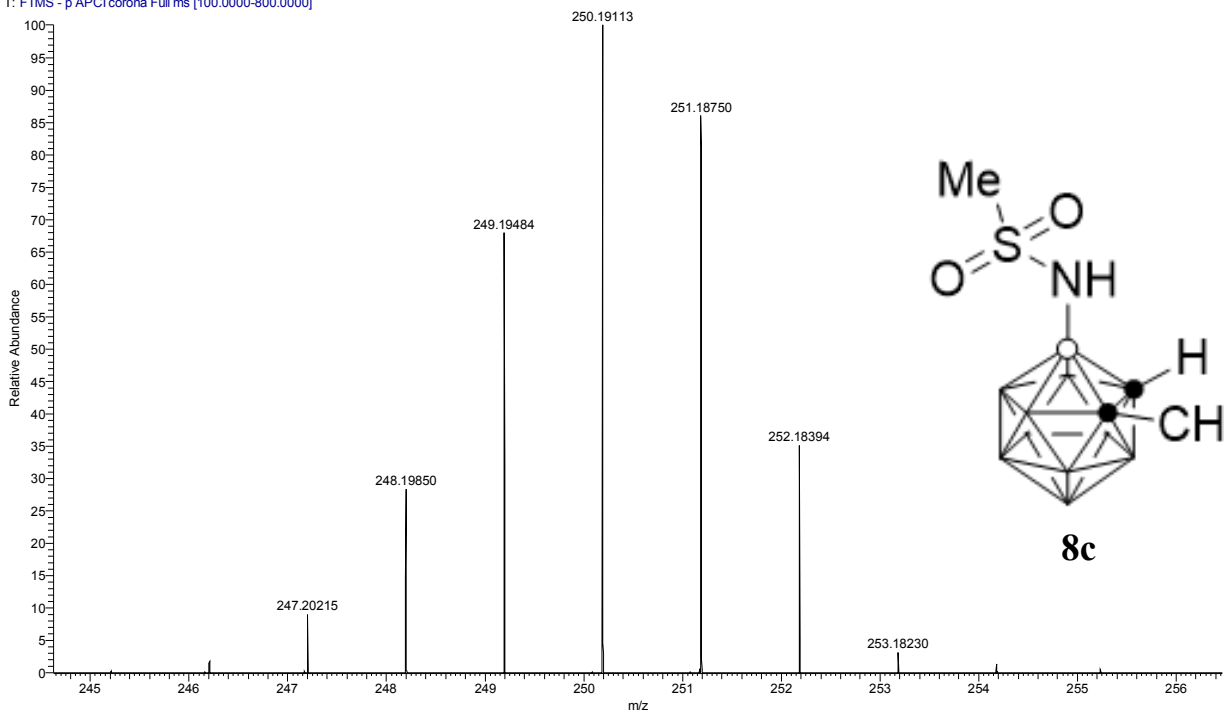

7.511  
7.500  
7.491  
7.487  
7.459  
7.449  
7.445  
7.437  
7.432  
7.260

4.965

4.410  
4.287

1.994

1.555

1hr-H-0870-cdcl3

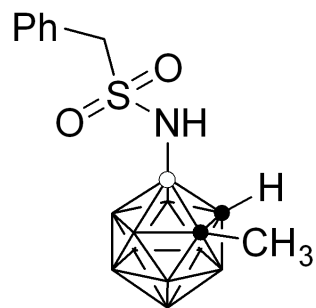

9c

<sup>3</sup>J 'POT'\*622'OJ |.'EFE<sub>3</sub>+

Current Data Parameters  
NAME 1hr-H-0870-cdcl3  
EXPNO 1  
PROCNO 1

F2 - Acquisition Parameters  
Date\_ 20180423  
Time 17.23 h  
INSTRUM spect  
PROBHD Z108618\_0257 (  
PULPROG zg30  
TD 65536  
SOLVENT CDCl3  
NS 16  
DS 2  
SWH 8012.820 Hz  
FIDRES 0.122266 Hz  
AQ 4.0894465 sec  
RG 64  
DW 62.400 usec  
DE 6.50 usec  
TE 294.3 K  
D1 1.00000000 sec  
TD0 1  
SFO1 400.2324714 MHz  
NUC1 1H  
P1 12.80 usec  
PLW1 13.56000042 W

F2 - Processing parameters  
SI 65536  
SF 400.2300098 MHz  
WDW EM  
SSB 0  
LB 0.30 Hz  
GB 0  
PC 1.00

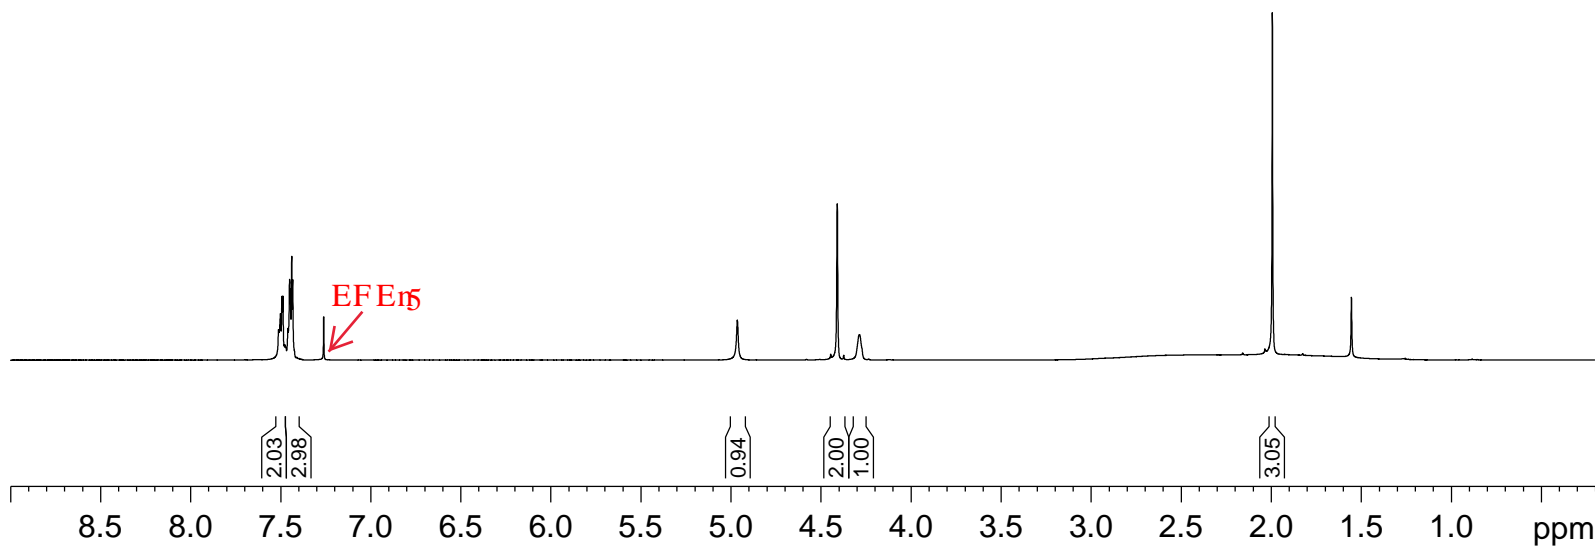

lhr-C-0870-cdcl3

131.17  
129.34  
129.20  
128.81

77.41  
77.16  
76.91  
71.81  
60.97  
60.40

22.84

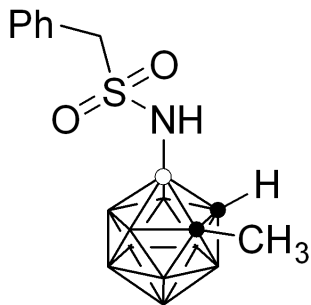

9c

<sup>35</sup>E}^3J ; 'POT'\*322'OJ | .'EFe15+

EFe15

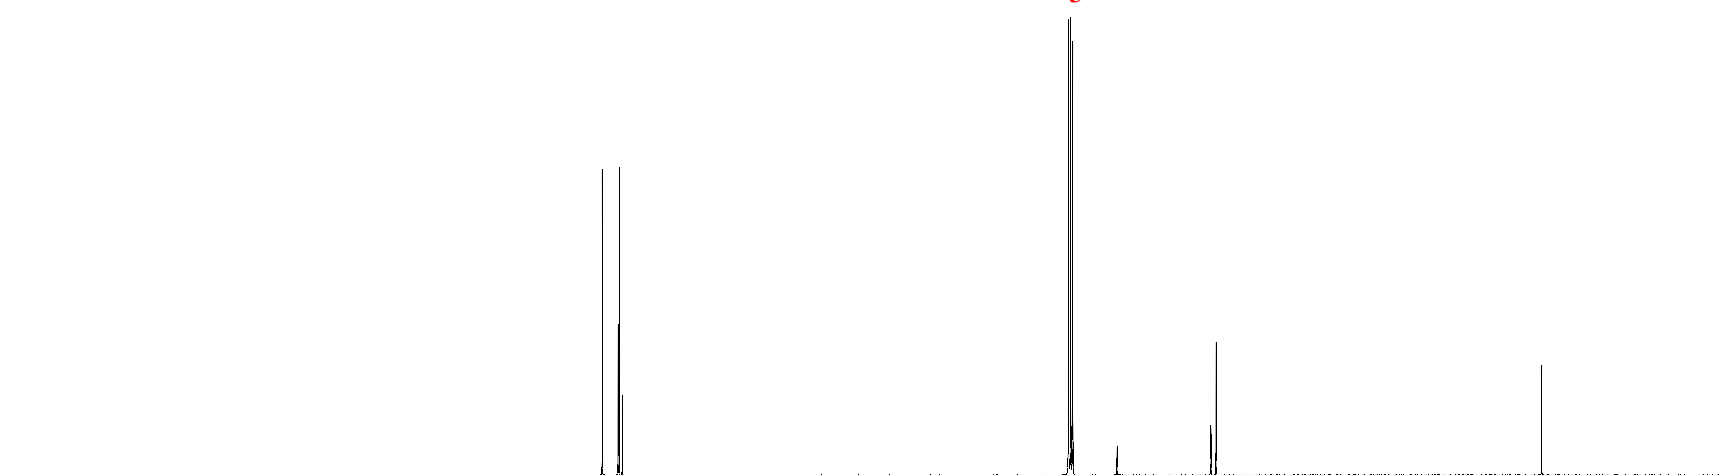

190 180 170 160 150 140 130 120 110 100 90 80 70 60 50 40 30 20 ppm

S63

Current Data Parameters  
NAME lhr-C-0870-cdcl3  
EXPNO 1  
PROCNO 1

F2 - Acquisition Parameters  
Date\_ 20180423  
Time 18.58 h  
INSTRUM spect  
PROBHD z149001\_0010 (  
PULPROG zgpg30  
TD 65536  
SOLVENT CDC13  
NS 500  
DS 4  
SWH 29761.904 Hz  
FIDRES 0.908261 Hz  
AQ 1.1010048 sec  
RG 206.72  
DW 16.800 usec  
DE 18.00 usec  
TE 298.0 K  
D1 2.0000000 sec  
D11 0.03000000 sec  
TD0 1  
SFO1 125.7703643 MHz  
NUC1 13C  
P1 10.00 usec  
PLW1 61.0000000 W  
SFO2 500.1320005 MHz  
NUC2 1H  
CPDPRG[2] waltz16  
PCPD2 80.00 usec  
PLW2 15.0000000 W  
PLW12 0.29663000 W  
PLW13 0.14920001 W

F2 - Processing parameters  
SI 32768  
SF 125.7577738 MHz  
WDW EM  
SSB 0  
LB 1.00 Hz  
GB 0  
PC 1.40

lhr-B-0870-cdcl3

Current Data Parameters  
NAME lhr-B-0870-cdcl3  
EXPNO 1  
PROCNO 1

F2 - Acquisition Parameters  
Date\_ 20180423  
Time 17.27 h  
INSTRUM spect  
PROBHD z108618\_0257 (  
PULPROG zgdc  
TD 65536  
SOLVENT CDCl3  
NS 26  
DS 4  
SWH 24038.461 Hz  
FIDRES 0.366798 Hz  
AQ 1.3631488 sec  
RG 322  
DW 20.800 usec  
DE 6.50 usec  
TE 294.8 K  
D1 2.0000000 sec  
D11 0.0300000 sec  
TD0 1  
SFO1 128.4096890 MHz  
NUC1 11B  
P1 7.50 usec  
PLW1 55.09999847 W  
SFO2 400.2316009 MHz  
NUC2 1H  
CPDPRG[2] waltz16  
PCPD2 90.00 usec  
PLW2 13.56000042 W  
PLW12 0.27428001 W

F2 - Processing parameters  
SI 32768  
SF 128.4097615 MHz  
WDW EM  
SSB 0  
LB 1.00 Hz  
GB 0  
PC 1.40

—5.52  
—6.43  
  
—10.19  
—11.58  
—12.42  
  
—14.44  
—15.35

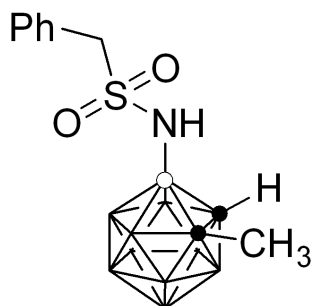

9c

$^{33}\text{D}$  J ; 'POT' 34: 'OJ | .'EFEn<sub>3</sub>+

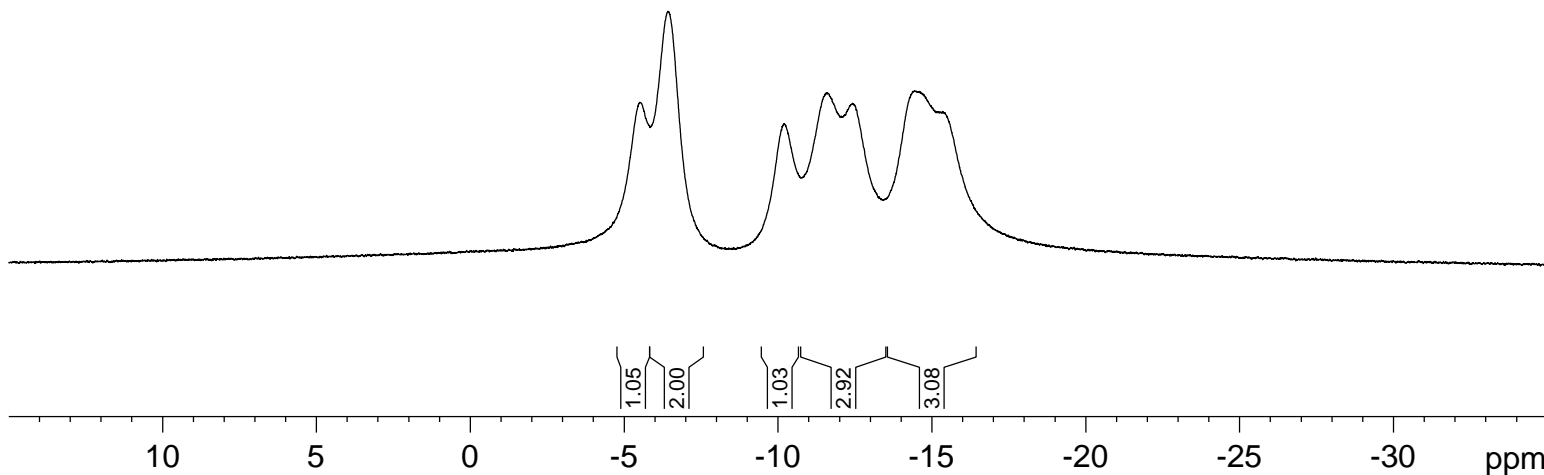

lhr-B-0870-cdcl3(C)

Current Data Parameters  
NAME lhr-B-0870-cdcl3(C)  
EXPNO 1  
PROCNO 1

F2 - Acquisition Parameters  
Date\_ 20180423  
Time 17.30 h  
INSTRUM spect  
PROBHD z108618\_0257 (  
PULPROG zg  
TD 65536  
SOLVENT CDCl3  
NS 31  
DS 2  
SWH 24038.461 Hz  
FIDRES 0.366798 Hz  
AQ 1.3631488 sec  
RG 362  
DW 20.800 usec  
DE 6.50 usec  
TE 294.4 K  
D1 2.00000000 sec  
TD0 1  
SFO1 128.4096890 MHz  
NUC1 11B  
P1 7.50 usec  
PLW1 55.09999847 W

F2 - Processing parameters  
SI 32768  
SF 128.4097430 MHz  
WDW EM  
SSB 0  
LB 1.00 Hz  
GB 0  
PC 1.40

— -4.80  
— -6.03  
— -6.92  
  
— -9.53  
— -10.67  
— -11.85  
— -12.98  
— -13.57  
— -14.73  
— -15.92

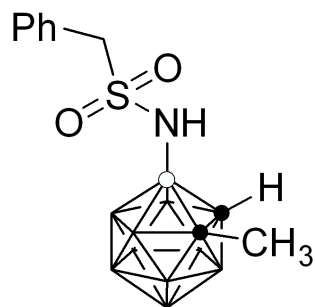

9c

<sup>33</sup>D POT \*34: 'OJ | . 'EFEn<sub>3</sub>+

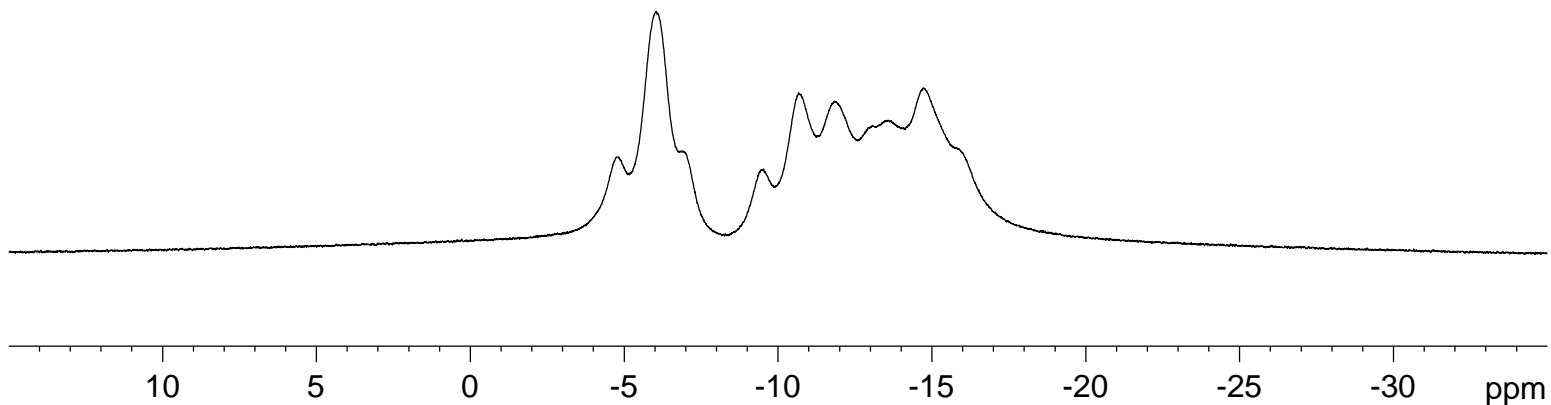

# Thermo QEFMS Analysis Report

## Analysis Info

|               |                                        |                |          |
|---------------|----------------------------------------|----------------|----------|
| Sample Name : | Lhr-0870                               | Reference No.: | Wqzwx459 |
| Instrument :  | Q Exactive Focus Orbitrap              |                |          |
| Source :      | HESI II                                | Polarity :     | Negative |
| Comment :     | ESI neg, 3.0kV, by LC, with sheath gas |                |          |

## Accurate Mass Measurement

|                                        |                                                                   |
|----------------------------------------|-------------------------------------------------------------------|
| Molecular formula :                    | C <sub>10</sub> H <sub>21</sub> B <sub>10</sub> NO <sub>2</sub> S |
| Experimental Mass [M-H] <sup>-</sup> : | 326.22225                                                         |
| Theoretical Mass [M-H] <sup>-</sup> :  | 326.22291                                                         |
| Error (ppm) :                          | 2.0                                                               |

D:\Raw data\wqzwx459

06/04/18 16:19:01

lhr-0870

wqzwx459 #50 RT: 0.47 AV: 1 SB: 60 0.41-0.66, 1.06-1.94 NL: 2.64E8  
T: FTMS - p ESI Full ms [150.0000-1200.0000]

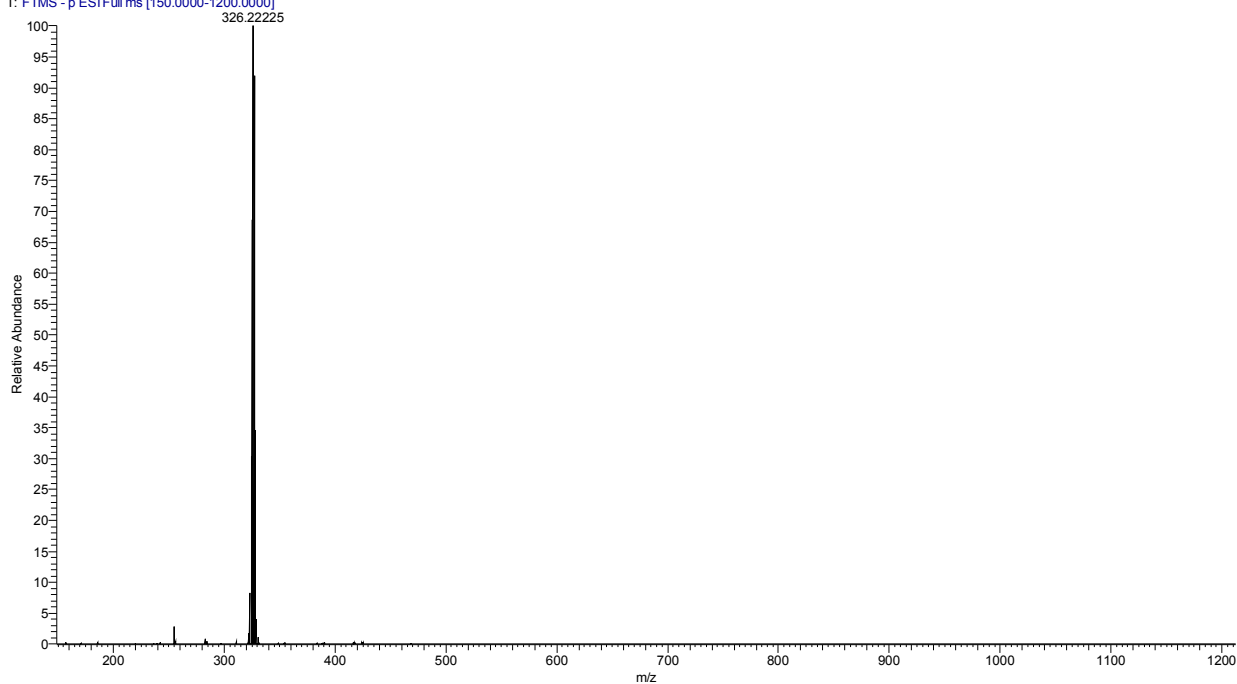

wqzwx459 #50 RT: 0.47 AV: 1 SB: 60 0.41-0.66, 1.06-1.94 NL: 2.64E8  
T: FTMS - p ESI Full ms [150.0000-1200.0000]

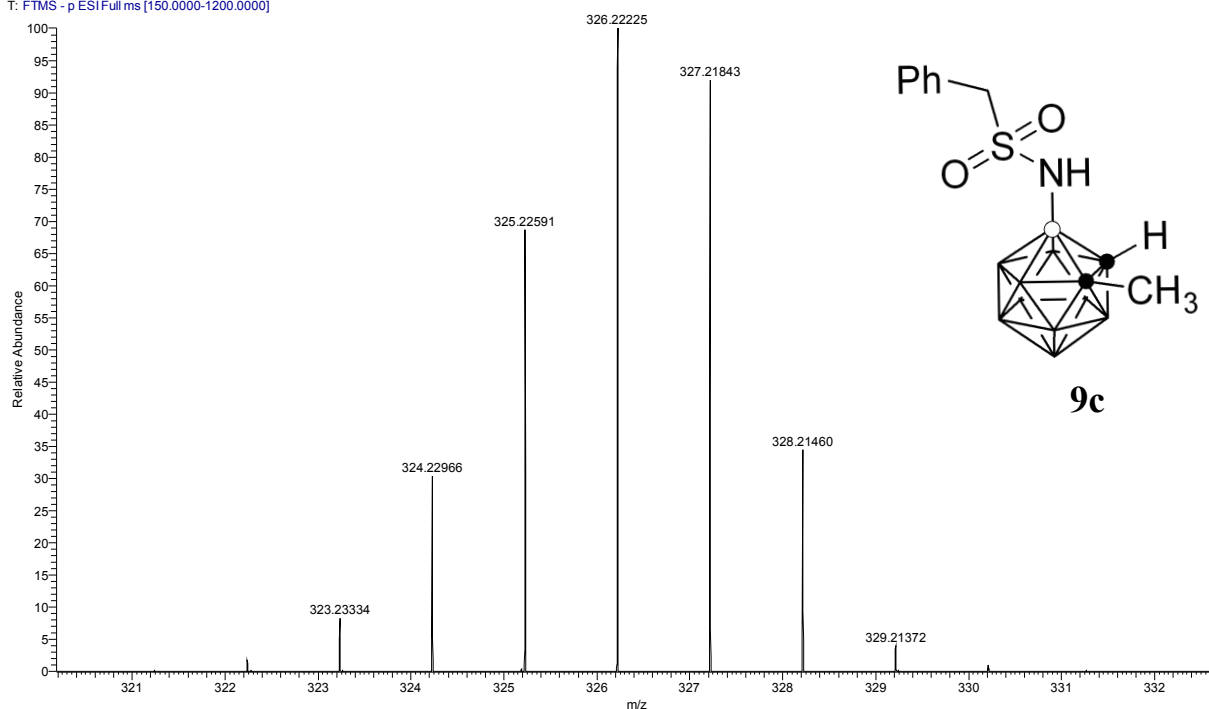

7.824  
7.804  
7.355  
7.335  
7.260

5.507

4.197

2.524  
2.505  
2.486  
2.457  
2.430  
2.325  
2.306  
2.287  
2.269  
2.250  
1.627

1.158  
1.139  
1.120

lhr-H-0582-cc-CDCl3

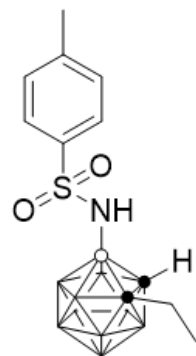

**10c**

<sup>3</sup>J POT 622 OJ | .EF E15+

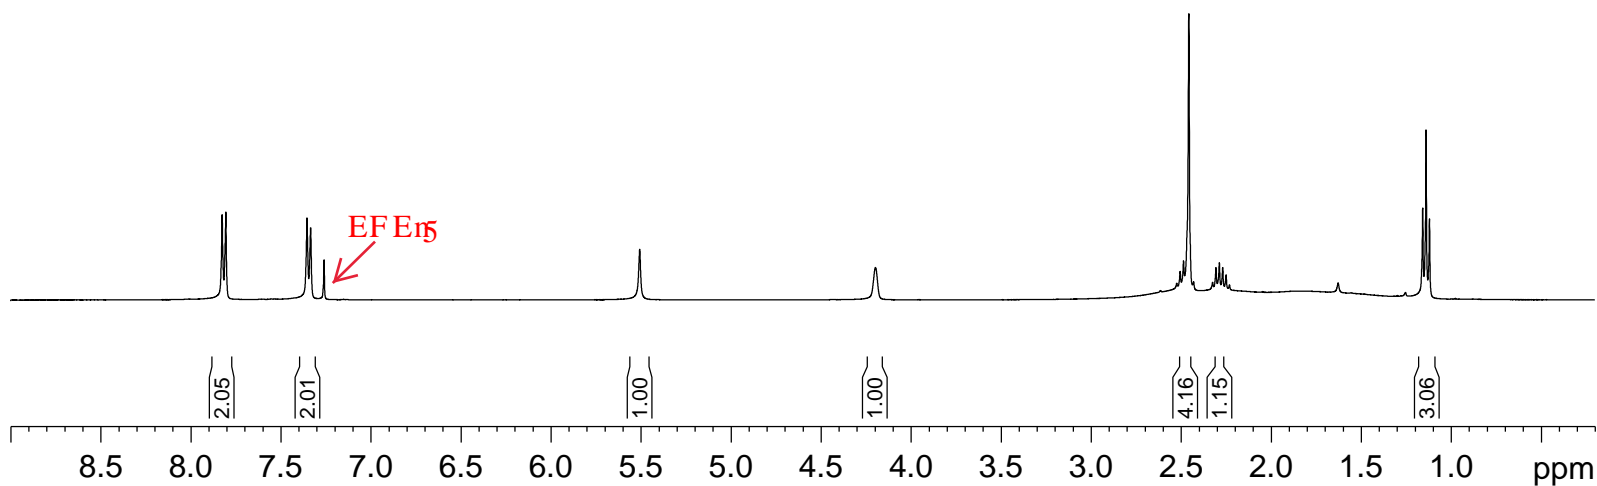

Current Data Parameters  
NAME lhr-H-0582-cc-CDCl3  
EXPNO 1  
PROCNO 1

F2 - Acquisition Parameters  
Date\_ 20170101  
Time 20.07 h  
INSTRUM spect  
PROBHD Z108618\_0257 (zg30)  
PULPROG zg30  
TD 65536  
SOLVENT CDCl3  
NS 16  
DS 2  
SWH 8012.820 Hz  
FIDRES 0.122266 Hz  
AQ 4.0894465 sec  
RG 203  
DW 62.400 usec  
DE 6.50 usec  
TE 295.1 K  
D1 1.00000000 sec  
TD0 1  
SFO1 400.2324714 MHz  
NUC1 1H  
P1 12.80 usec  
PLW1 13.56000042 W

F2 - Processing parameters  
SI 65536  
SF 400.2300105 MHz  
WDW EM  
SSB 0  
LB 0.30 Hz  
GB 0  
PC 1.00

144.18  
138.28  
129.95  
126.77

77.48  
77.16  
76.84

60.12

28.42

21.76

13.24

1hr-C-0582-cc-CDCl3

Current Data Parameters  
NAME 1hr-C-0582-cc-CDCl3  
EXPNO 1  
PROCNO 1

F2 - Acquisition Parameters  
Date\_ 20170101  
Time 20.13 h  
INSTRUM spect  
PROBHD Z108618\_0257 (  
PULPROG zgpg30  
TD 65536  
SOLVENT CDCl3  
NS 271  
DS 4  
SWH 29761.904 Hz  
FIDRES 0.454131 Hz  
AQ 1.1010048 sec  
RG 203  
DW 16.800 usec  
DE 6.50 usec  
TE 295.3 K  
D1 2.00000000 sec  
D11 0.03000000 sec  
TD0 1  
SFO1 100.6479773 MHz  
NUC1 13C  
P1 9.50 usec  
PLW1 55.34000015 W  
SFO2 400.2316009 MHz  
NUC2 1H  
CPDPRG[2] waltz16  
PCPD2 90.00 usec  
PLW2 13.56000042 W  
PLW12 0.27428001 W  
PLW13 0.13796000 W

F2 - Processing parameters  
SI 32768  
SF 100.6379014 MHz  
WDW EM  
SSB 0  
LB 1.00 Hz  
GB 0  
PC 1.40

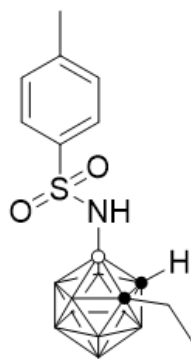

10c

$^{35}\text{E}\}^3\text{J} ; \text{'POT' } ^3\text{22' } \text{OJ} | \text{'EFE}_{15}+$

EFE<sub>15</sub>

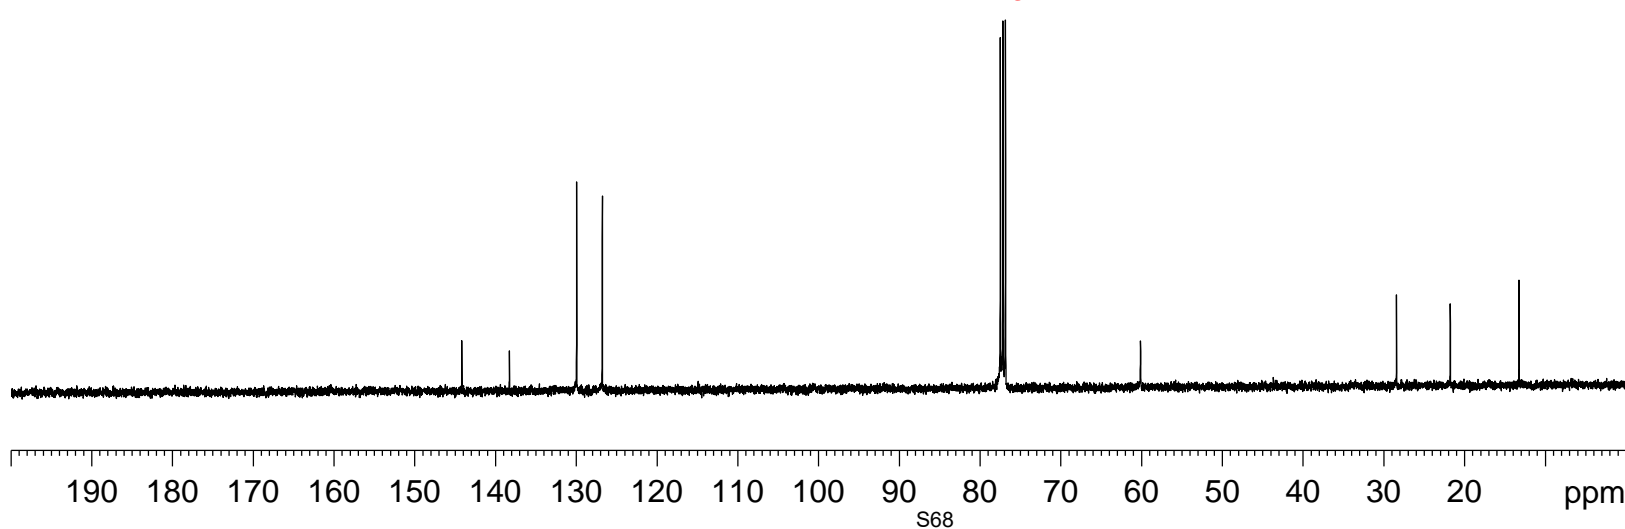



lhr-B-0582-cc-CDCl3

Current Data Parameters  
NAME lhr-B-0582-cc-CDCl3  
EXPNO 1  
PROCNO 1

F2 - Acquisition Parameters  
Date\_ 20170101  
Time 20.27 h  
INSTRUM spect  
PROBHD Z108618\_0257 (  
PULPROG zgdc  
TD 65536  
SOLVENT CDCl3  
NS 26  
DS 4  
SWH 24038.461 Hz  
FIDRES 0.366798 Hz  
AQ 1.3631488 sec  
RG 287  
DW 20.800 usec  
DE 6.50 usec  
TE 295.6 K  
D1 2.00000000 sec  
D11 0.03000000 sec  
TD0 1  
SF01 128.4096890 MHz  
NUC1 11B  
P1 7.50 usec  
PLW1 55.09999847 W  
SF02 400.2316009 MHz  
NUC2 1H  
CPDPRG[2] waltz16  
PCPD2 90.00 usec  
PLW2 13.56000042 W  
PLW12 0.27428001 W

F2 - Processing parameters  
SI 32768  
SF 128.4097615 MHz  
WDW EM  
SSB 0  
LB 1.00 Hz  
GB 0  
PC 1.40

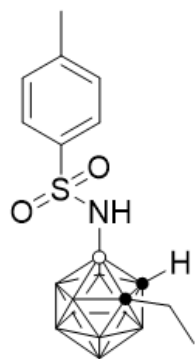

10c

$^{33}\text{D}\}^{3}\text{J}$  ; 'POT' 34: 'OJ | .'EFEn<sub>3</sub>+

— -5.97  
— -10.33  
— -13.35  
— -14.63  
— -15.65

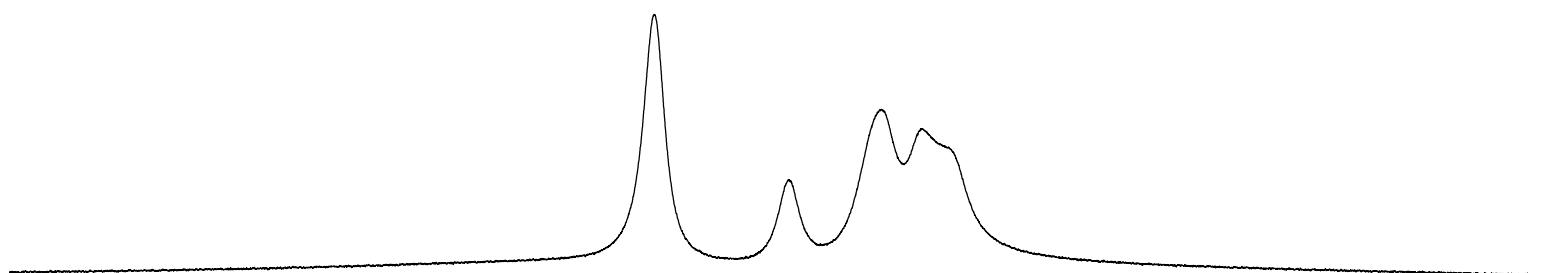

3.10  
1.13  
3.00  
3.15

10 5 0 -5 -10 -15 -20 -25 -30 ppm  
S69

1hr-B-0582-cc-CDCl3(C)

Current Data Parameters  
NAME 1hr-B-0582-cc-CDCl3(C)  
EXPNO 1  
PROCNO 1

F2 - Acquisition Parameters  
Date\_ 20170101  
Time 20.28 h  
INSTRUM spect  
PROBHD Z108618\_0257 (  
PULPROG zg  
TD 65536  
SOLVENT CDCl3  
NS 37  
DS 2  
SWH 24038.461 Hz  
FIDRES 0.366798 Hz  
AQ 1.3631488 sec  
RG 203  
DW 20.800 usec  
DE 6.50 usec  
TE 295.2 K  
D1 2.0000000 sec  
TD0 1  
SFO1 128.4096890 MHz  
NUC1 11B  
P1 7.50 usec  
PLW1 55.09999847 W

F2 - Processing parameters  
SI 32768  
SF 128.4097504 MHz  
WDW EM  
SSB 0  
LB 1.00 Hz  
GB 0  
PC 1.40

5.33  
5.95  
9.66  
10.85  
12.69  
13.91  
14.98  
16.17

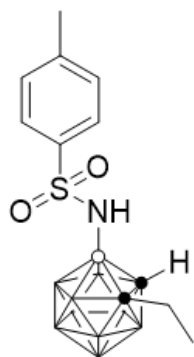

10c

$^{33}\text{D}'\text{POT}^{\text{M}}\text{34:}'\text{OJ} | .'\text{EFe}_2^+$

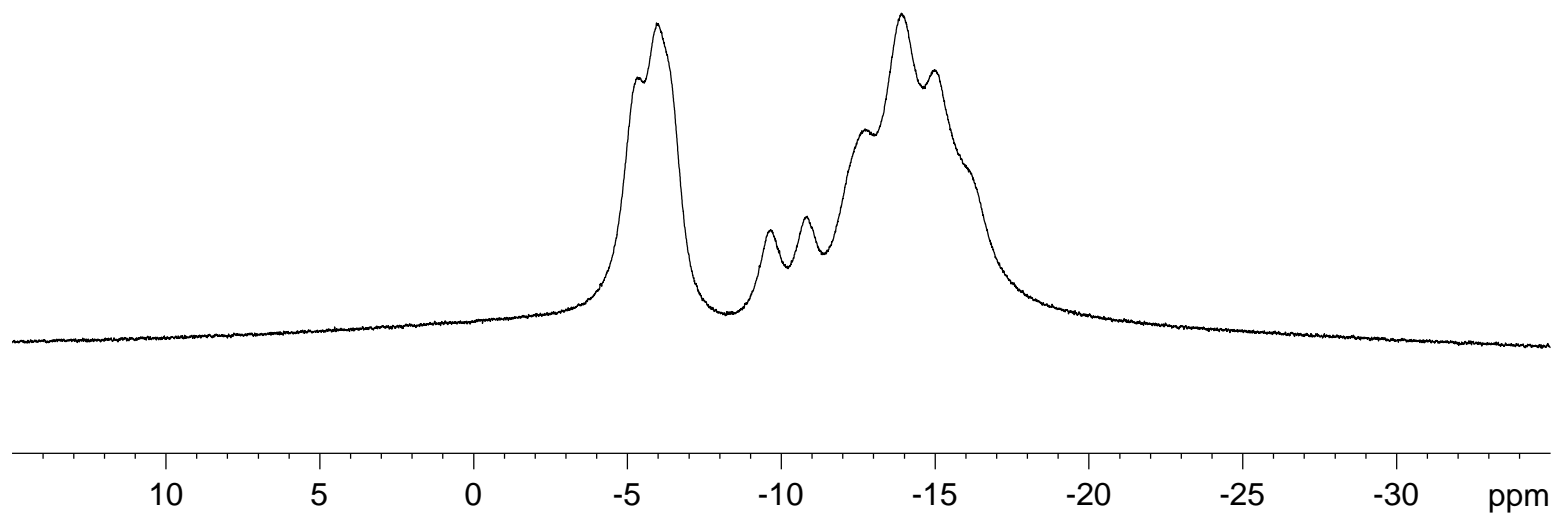

# Thermo QEFMS Analysis Report

## Analysis Info

|               |                                         |                |          |
|---------------|-----------------------------------------|----------------|----------|
| Sample Name : | Lhr-0582                                | Reference No.: | Qzwx146  |
| Instrument :  | Q Exactive Focus Orbitrap               |                |          |
| Source :      | APCI                                    | Polarity :     | Negative |
| Comment :     | APCI neg, 5.0uA, by LC, with sheath gas |                |          |

## Accurate Mass Measurement

|                           |                                                                   |
|---------------------------|-------------------------------------------------------------------|
| Molecular formula :       | C <sub>11</sub> H <sub>23</sub> B <sub>10</sub> NO <sub>2</sub> S |
| Experimental Mass [M-H] : | 340.23795                                                         |
| Theoretical Mass [M-H] :  | 340.23861                                                         |
| Error (ppm) :             | 1.9                                                               |

D:\Raw data\qzwx146\_170310155001

03/10/17 15:51:06

qzwx146\_170310155001 #81 RT: 0.37 AV: 1 SB: 189 0.12-0.31, 0.53-1.19 NL: 2.16E6  
T: FTMS - p APCI corona Full ms [100.0000-800.0000]

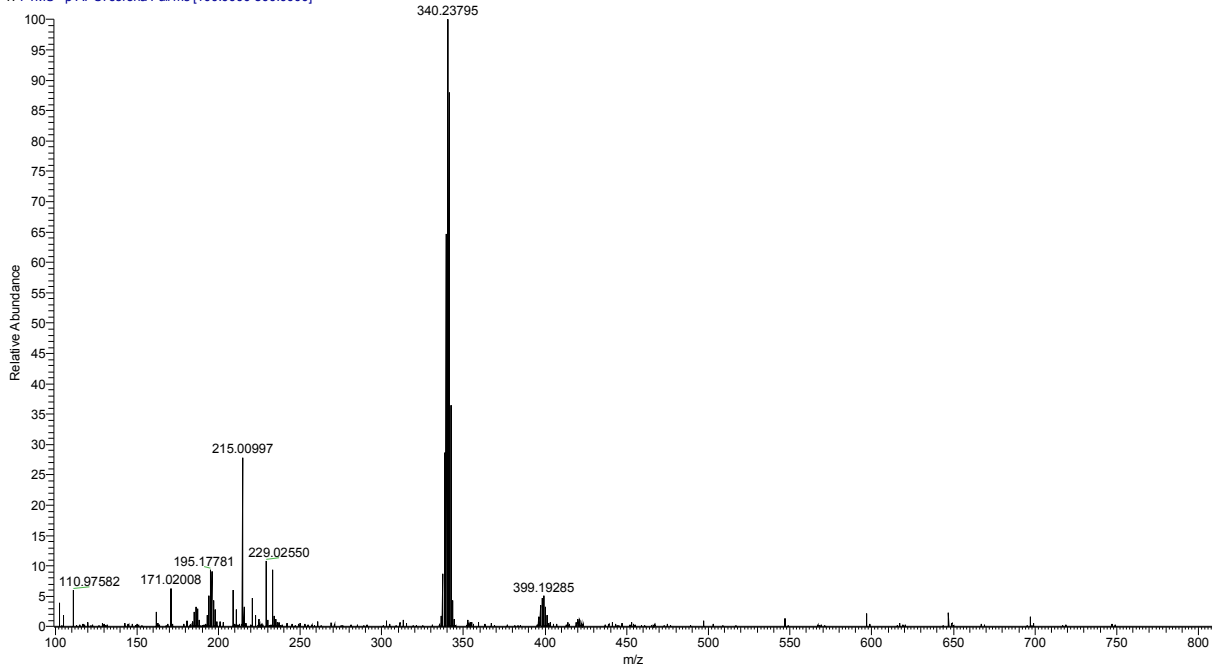

qzwx146\_170310155001 #81 RT: 0.37 AV: 1 SB: 189 0.12-0.31, 0.53-1.19 NL: 2.16E6  
T: FTMS - p APCI corona Full ms [100.0000-800.0000]

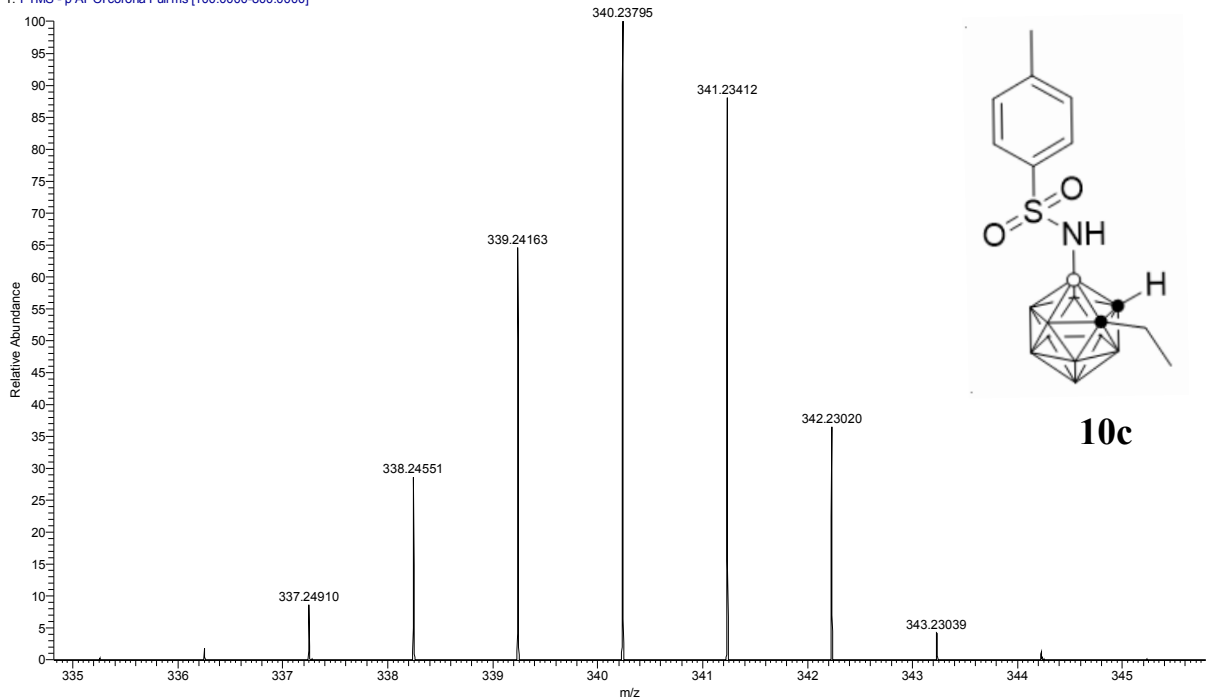

7.869  
7.848  
7.358  
7.338  
7.260  
7.153  
7.132  
7.128  
7.106

5.683

4.139

3.566

2.447  
2.342

1.627

lhr-H-0564-cc-CDCl3

Bruker Advance III 400

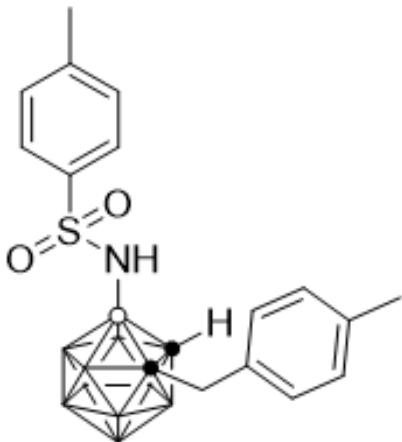

11c

$^3\text{J } ^1\text{POT}^*622^{\text{OJ}} | .^1\text{FEn}_3+$

Current Data Parameters  
NAME lhr-H-0564-cc-CDCl3  
EXPNO 1  
PROCNO 1

F2 - Acquisition Parameters  
Date\_ 20161217  
Time 20.55 h  
INSTRUM spect  
PROBHD zg30  
PULPROG zg30  
TD 65536  
SOLVENT CDCl3  
NS 12  
DS 2  
SWH 8012.820 Hz  
FIDRES 0.122266 Hz  
AQ 4.0894465 sec  
RG 203  
DW 62.400 usec  
DE 6.50 usec  
TE 296.0 K  
D1 1.00000000 sec  
TD0 1  
SFO1 400.1324708 MHz  
NUC1 1H  
P1 15.00 usec  
PLW1 8.31000042 W

F2 - Processing parameters  
SI 65536  
SF 400.1300097 MHz  
WDW EM  
SSB 0  
LB 0.30 Hz  
GB 0  
PC 1.00

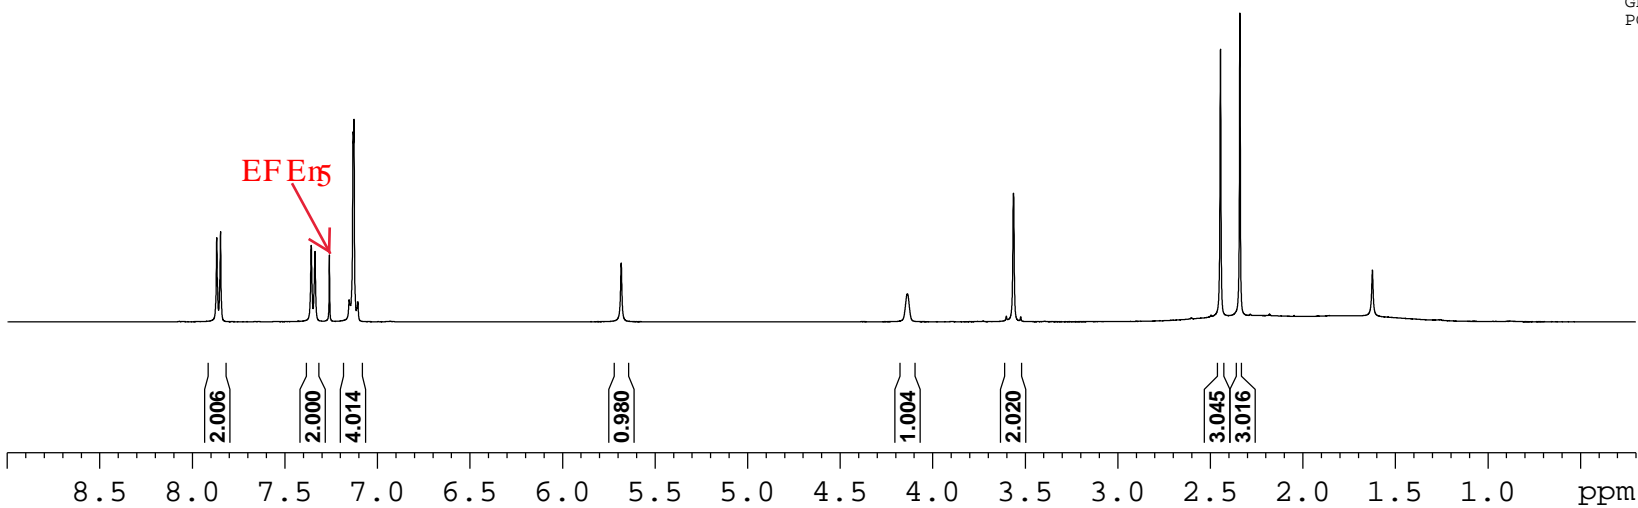

lhr-C-0564-cc-CDC13

Bruker Advance III 400

Current Data Parameters  
NAME lhr-C-0564-cc-CDC13  
EXPNO 1  
PROCNO 1

F2 - Acquisition Parameters  
Date\_ 20161217  
Time 20.59 h  
INSTRUM spect  
PROBHD Z824601\_0021 (  
PULPROG zgpg30  
TD 65536  
SOLVENT CDC13  
NS 774  
DS 4  
SWH 24038.461 Hz  
FIDRES 0.366798 Hz  
AQ 1.3631488 sec  
RG 203  
DW 20.800 usec  
DE 6.50 usec  
TE 296.1 K  
D1 2.0000000 sec  
D11 0.0300000 sec  
TD0 1  
SFO1 100.6228298 MHz  
NUC1 13C  
P1 9.50 usec  
PLW1 41.2500000 W  
SFO2 400.1316005 MHz  
NUC2 1H  
CPDPRG[2] waltz16  
PCPD2 90.00 usec  
PLW2 8.31000042 W  
PLW12 0.23083000 W  
PLW13 0.11611000 W

F2 - Processing parameters  
SI 32768  
SF 100.6127559 MHz  
WDW EM  
SSB 0  
LB 1.00 Hz  
GB 0  
PC 1.40

144.227  
138.299  
138.088  
131.751  
130.255  
129.992  
129.630  
126.823

77.477  
77.160  
76.842  
76.344

59.107

39.984

21.748  
21.289

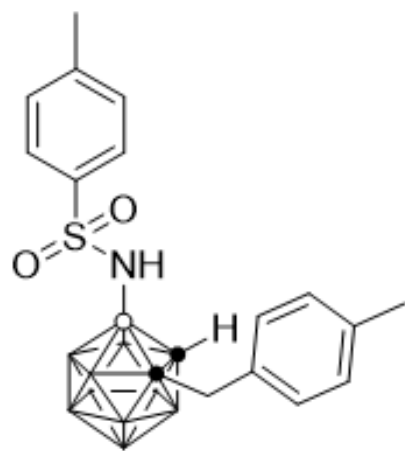

11c

<sup>35</sup>E}^3J ; "POT"\*322"OJ | ."EFe<sub>3</sub>+

EFE<sub>3</sub>

180 160 140 120 100 80 60 40 20 ppm

S73

1hr-B-0564-cc-CDCl3

Current Data Parameters  
NAME 1hr-B-0564-cc-CDCl3  
EXPNO 1  
PROCNO 1

F2 - Acquisition Parameters  
Date\_ 20161218  
Time 15.29 h  
INSTRUM spect  
PROBHD zgdc  
PULPROG zgdc  
TD 65536  
SOLVENT CDCl3  
NS 16  
DS 4  
SWH 24038.461 Hz  
FIDRES 0.366798 Hz  
AQ 1.3631488 sec  
RG 287  
DW 20.800 usec  
DE 6.50 usec  
TE 296.2 K  
D1 2.0000000 sec  
D11 0.0300000 sec  
TD0 1  
SFO1 128.4096890 MHz  
NUC1 11B  
P1 7.50 usec  
PLW1 55.09999847 W  
SFO2 400.2316009 MHz  
NUC2 1H  
CPDPRG[2] waltz16  
PCPD2 90.00 usec  
PLW2 13.56000042 W  
PLW12 0.27428001 W

F2 - Processing parameters  
SI 32768  
SF 128.4097615 MHz  
WDW EM  
SSB 0  
LB 1.00 Hz  
GB 0  
PC 1.40

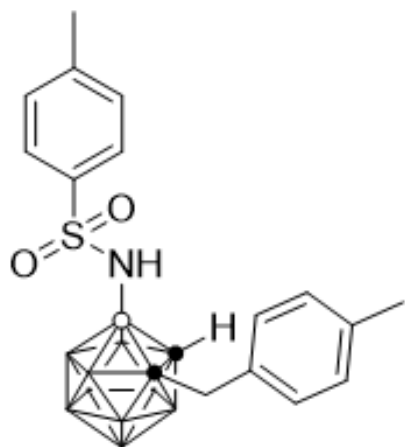

11c

$^{33}\text{D}$  J ; 'POT' 34: 'OJ | .'EFEn<sub>3</sub>+

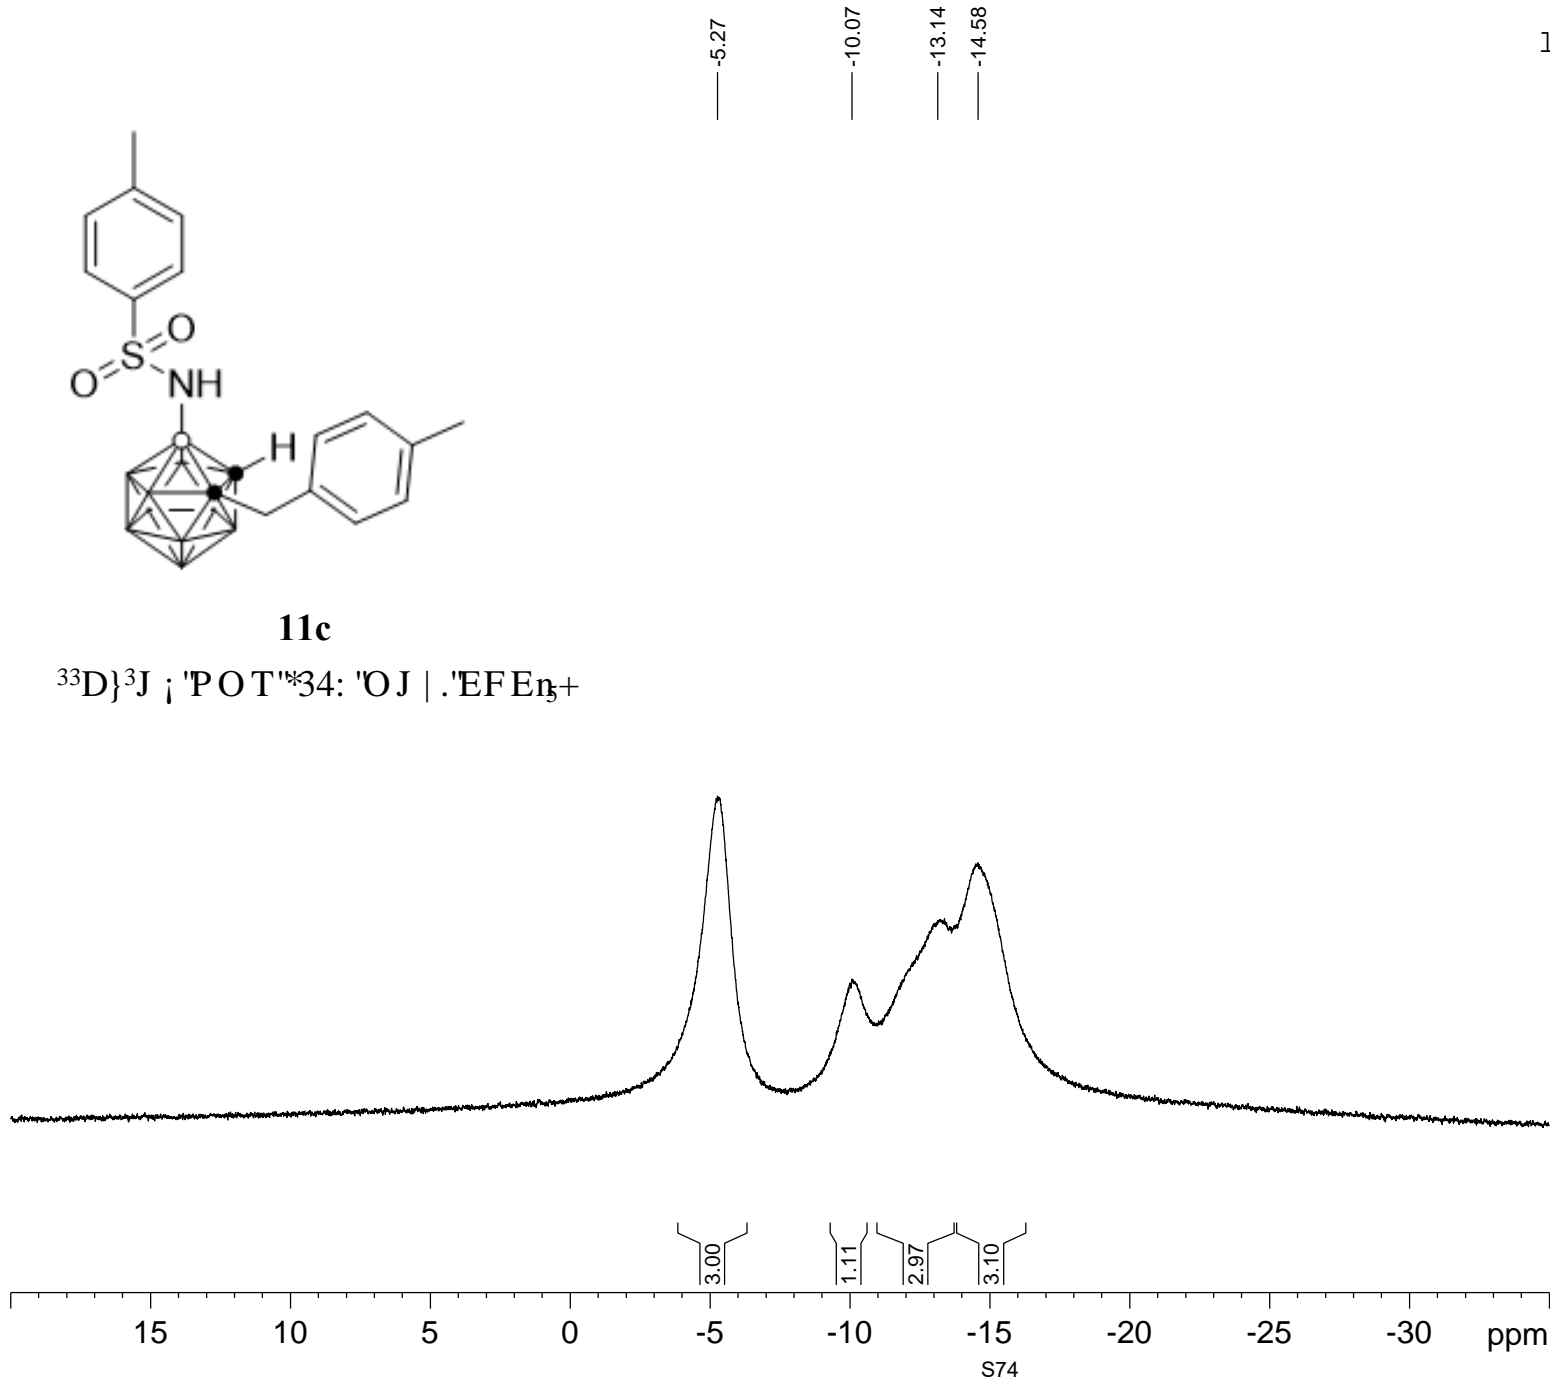

1hr-B-0564-cc-CDCl3(C)

Current Data Parameters  
NAME 1hr-B-0564-cc-CDCl3(C)  
EXPNO 1  
PROCNO 1

F2 - Acquisition Parameters  
Date\_ 20161218  
Time 15.31 h  
INSTRUM spect  
PROBHD Z108618\_0257 (  
PULPROG zg  
TD 65536  
SOLVENT CDCl3  
NS 31  
DS 2  
SWH 24038.461 Hz  
FIDRES 0.366798 Hz  
AQ 1.3631488 sec  
RG 362  
DW 20.800 usec  
DE 6.50 usec  
TE 296.0 K  
D1 2.0000000 sec  
TD0 1  
SFO1 128.4096890 MHz  
NUC1 11B  
P1 7.50 usec  
PLW1 55.09999847 W

F2 - Processing parameters  
SI 32768  
SF 128.4097430 MHz  
WDW EM  
SSB 0  
LB 1.00 Hz  
GB 0  
PC 1.40

4.71  
5.17  
9.32  
10.61  
12.42  
13.78  
14.75

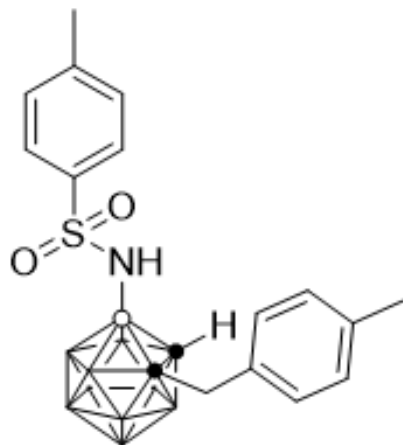

11c

<sup>33</sup>D POT 34: 'OJ | . 'E F E n<sub>3</sub> +

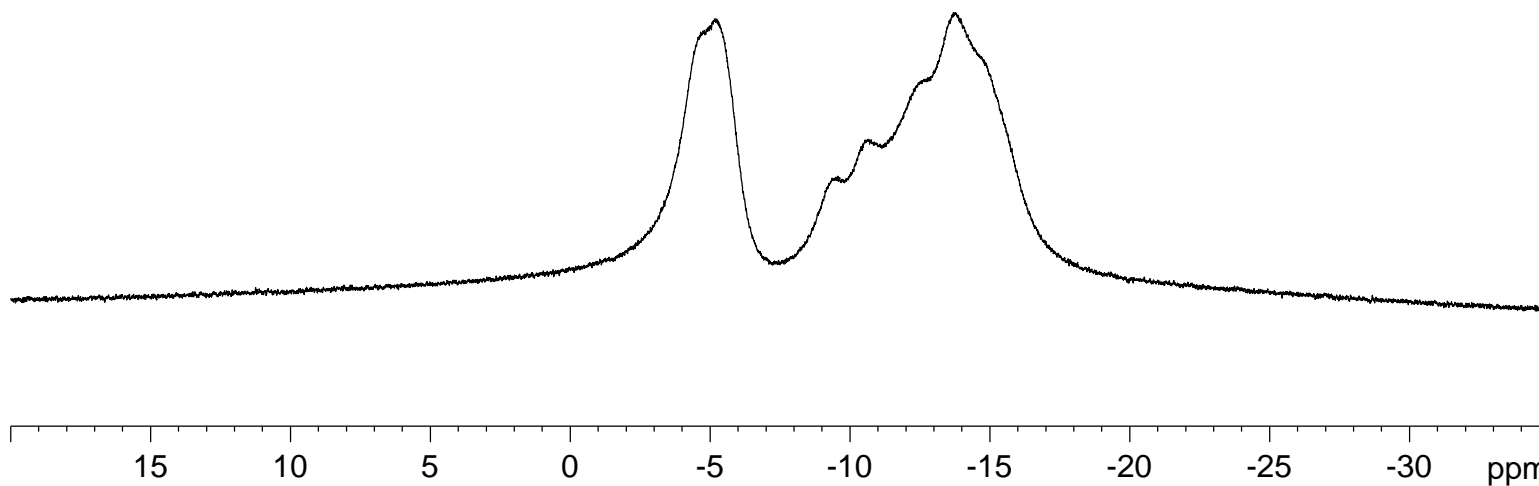

# Thermo QEFMS Analysis Report

## Analysis Info

|               |                                        |                |          |
|---------------|----------------------------------------|----------------|----------|
| Sample Name : | Lhr-0564                               | Reference No.: | Qzwx144  |
| Instrument :  | Q Exactive Focus Orbitrap              |                |          |
| Source :      | HESI II                                | Polarity :     | Positive |
| Comment :     | ESI pos, 3.5kV, by LC, with sheath gas |                |          |

## Accurate Mass Measurement

|                                         |                                                                   |
|-----------------------------------------|-------------------------------------------------------------------|
| Molecular formula :                     | C <sub>17</sub> H <sub>27</sub> B <sub>10</sub> NO <sub>2</sub> S |
| Experimental Mass [M+Na] <sup>+</sup> : | 440.26639                                                         |
| Theoretical Mass [M+Na] <sup>+</sup> :  | 440.26668                                                         |
| Error (ppm) :                           | 0.6                                                               |

D:\Raw data\qzwx144

03/09/17 17:05:55

qzwx144 #77 RT: 0.35 AV: 1 SB: 135 0.16-0.33, 0.59-1.02 NL: 2.40E7  
T: FTMS + p ESI Full ms [120.0000-1000.0000]

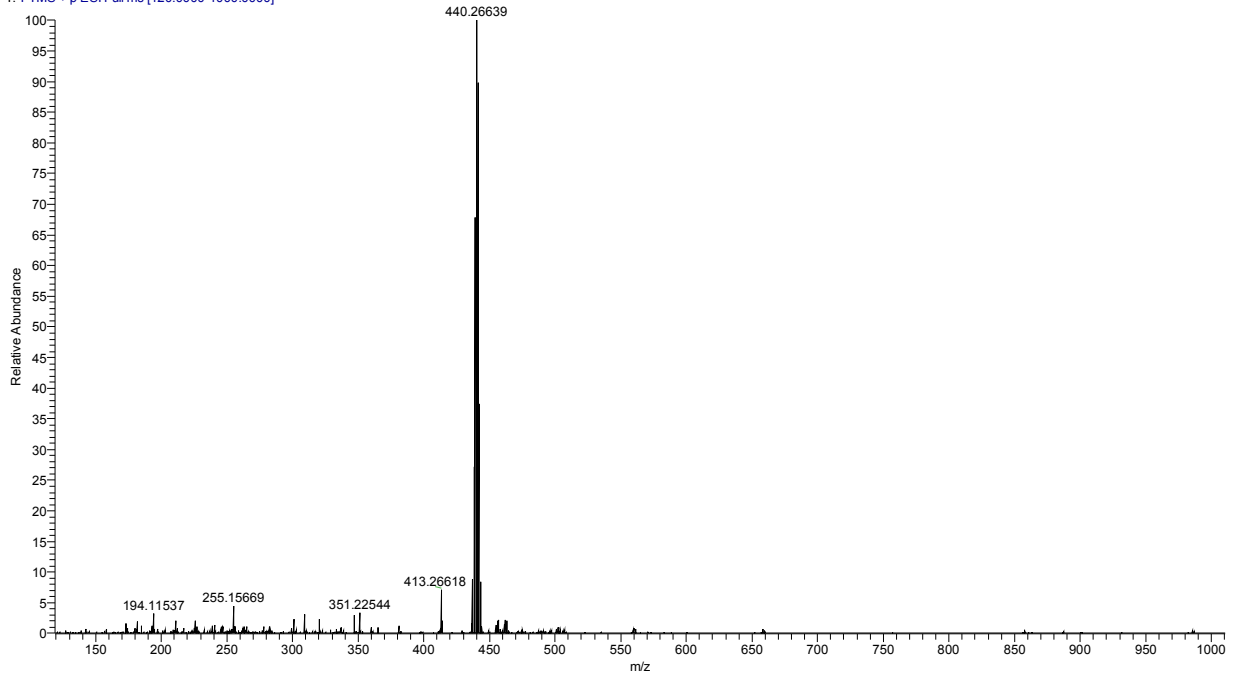

qzwx144 #77 RT: 0.35 AV: 1 SB: 135 0.16-0.33, 0.59-1.02 NL: 2.40E7  
T: FTMS + p ESI Full ms [120.0000-1000.0000]

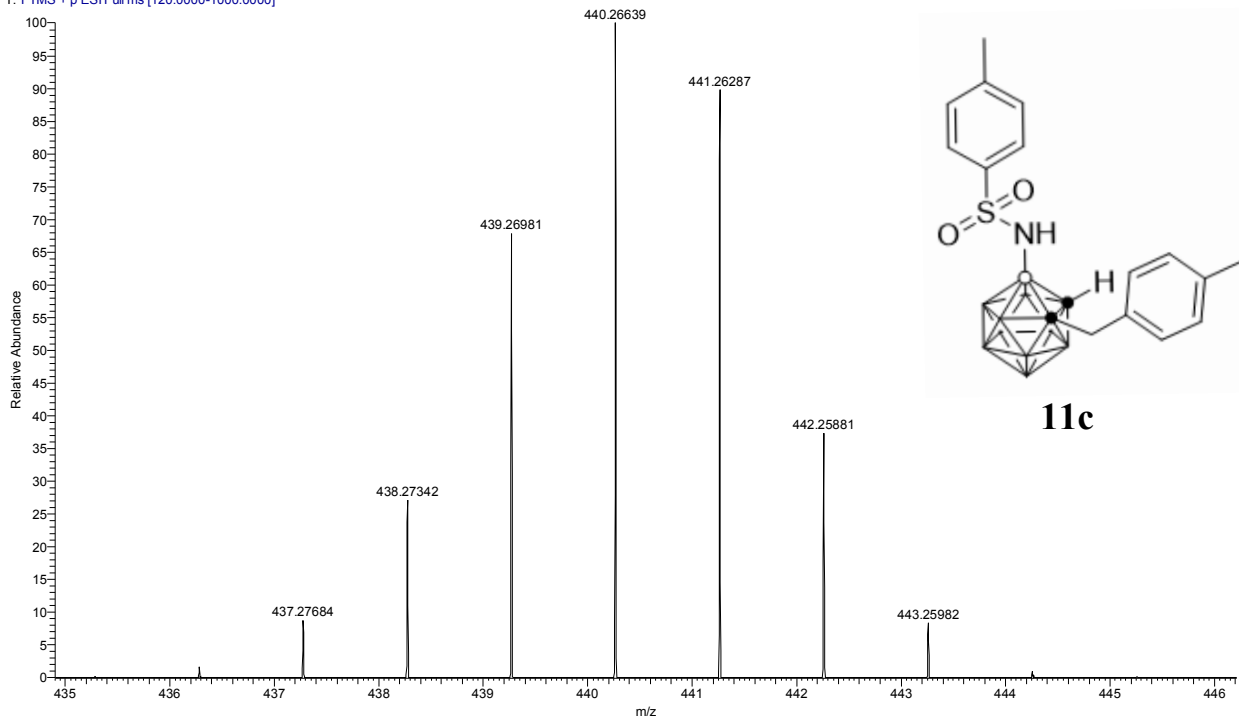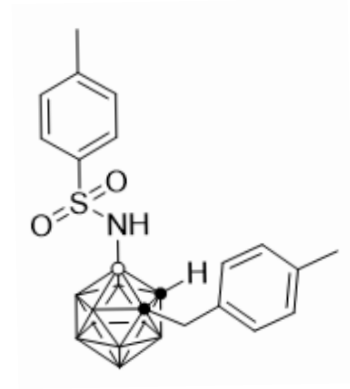

11c



lhr-H-0568-1-cc-CDCl3

Bruker Advance III 400

Current Data Parameters  
NAME lhr-H-0568-1-cc-CDCl3  
EXPNO 1  
PROCNO 1

F2 - Acquisition Parameters  
Date\_ 20161221  
Time 10.04 h  
INSTRUM spect  
PROBHD zg30  
PULPROG zg30  
TD 65536  
SOLVENT CDCl3  
NS 9  
DS 2  
SWH 8012.820 Hz  
FIDRES 0.122266 Hz  
AQ 4.0894465 sec  
RG 203  
DW 62.400 usec  
DE 6.50 usec  
TE 295.8 K  
D1 1.0000000 sec  
TD0 1  
SFO1 400.1324708 MHz  
NUC1 1H  
P1 15.00 usec  
PLW1 8.31000042 W

F2 - Processing parameters  
SI 65536  
SF 400.1300098 MHz  
WDW EM  
SSB 0  
LB 0.30 Hz  
GB 0  
PC 1.00

7.803  
7.783  
7.338  
7.316  
7.296  
7.276  
7.260  
6.880  
6.859  
6.835  
6.795

6.208  
6.168

5.404

4.351

3.828

2.430

1.601

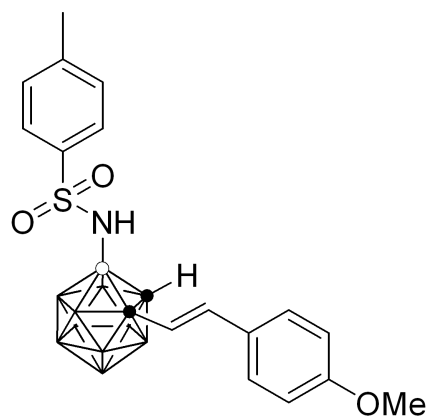

12c

<sup>3</sup>J 'POT' \* 622 'OJ | 'EF E<sub>3</sub>+

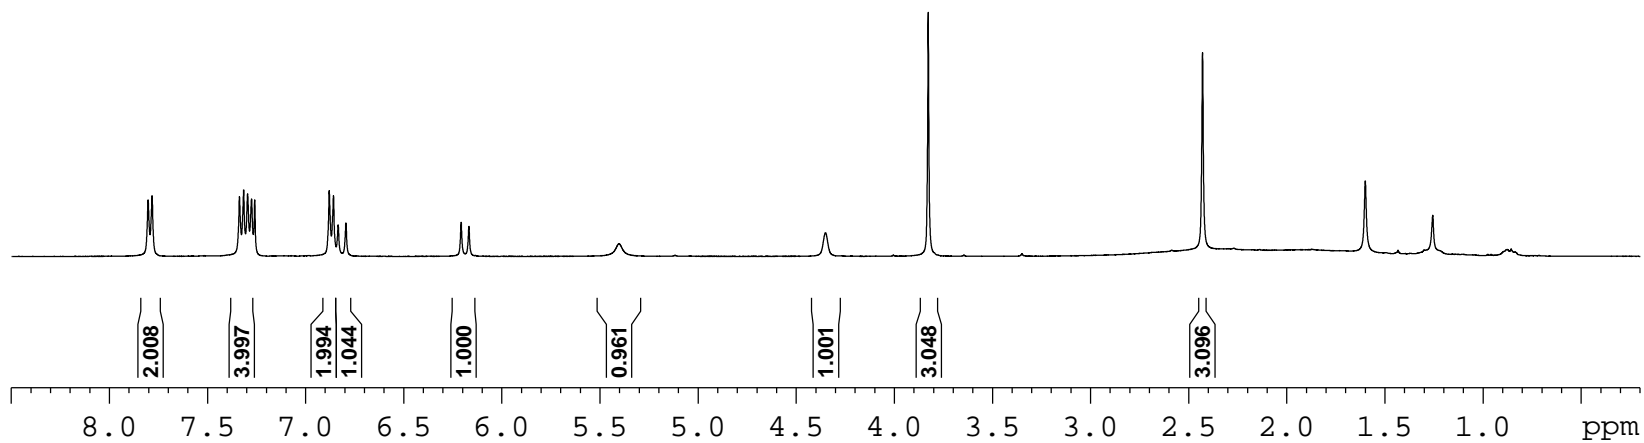

lhr-C-0568-1-cc-CDC13

Bruker Advance III 400

Current Data Parameters  
NAME lhr-C-0568-1-cc-CDC13  
EXPNO 1  
PROCNO 1

F2 - Acquisition Parameters  
Date\_ 20161221  
Time 16.43 h  
INSTRUM spect  
PROBHD Z824601\_0021 (  
PULPROG zgpg30  
TD 65536  
SOLVENT CDC13  
NS 901  
DS 4  
SWH 24038.461 Hz  
FIDRES 0.366798 Hz  
AQ 1.3631488 sec  
RG 203  
DW 20.800 usec  
DE 6.50 usec  
TE 295.5 K  
D1 2.00000000 sec  
D11 0.03000000 sec  
TD0 1  
SFO1 100.6228298 MHz  
NUC1 13C  
P1 9.50 usec  
PLW1 41.25000000 W  
SFO2 400.1316005 MHz  
NUC2 1H  
CPDPRG[2] waltz16  
PCPD2 90.00 usec  
PLW2 8.31000042 W  
PLW12 0.23083000 W  
PLW13 0.11611000 W

F2 - Processing parameters  
SI 32768  
SF 100.6127598 MHz  
WDW EM  
SSB 0  
LB 1.00 Hz  
GB 0  
PC 1.40

160.796  
143.991  
138.397  
138.057  
129.867  
128.708  
127.133  
126.797  
117.716  
114.397

77.478  
77.160  
76.843  
75.694

59.960  
55.484

21.697

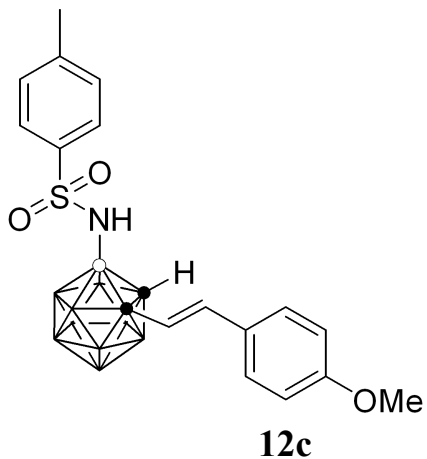

$^{35}\text{E} \{^3\text{J} \}_i \text{ 'POT '*322' OJ } | \text{ 'EF E}_3\text{+}$

EF E<sub>3</sub>

180 160 140 120 100 80 60 40 20 ppm

S78

lhr-B-0568-1-cc-CDCl3

Current Data Parameters  
NAME lhr-B-0568-1-cc-CDCl3  
EXPNO 1  
PROCNO 1

F2 - Acquisition Parameters  
Date\_ 20161221  
Time 13.19 h  
INSTRUM spect  
PROBHD z108618\_0257 (  
PULPROG zgdc  
TD 65536  
SOLVENT CDCl3  
NS 39  
DS 4  
SWH 24038.461 Hz  
FIDRES 0.366798 Hz  
AQ 1.3631488 sec  
RG 287  
DW 20.800 usec  
DE 6.50 usec  
TE 295.3 K  
D1 2.0000000 sec  
D11 0.03000000 sec  
TD0 1  
SFO1 128.4096890 MHz  
NUC1 11B  
P1 7.50 usec  
PLW1 55.09999847 W  
SFO2 400.2316009 MHz  
NUC2 1H  
CPDPRG[2] waltz16  
PCPD2 90.00 usec  
PLW2 13.56000042 W  
PLW12 0.27428001 W

F2 - Processing parameters  
SI 32768  
SF 128.4097615 MHz  
WDW EM  
SSB 0  
LB 1.00 Hz  
GB 0  
PC 1.40

— -5.55  
— -9.89  
— -12.15  
— -14.31

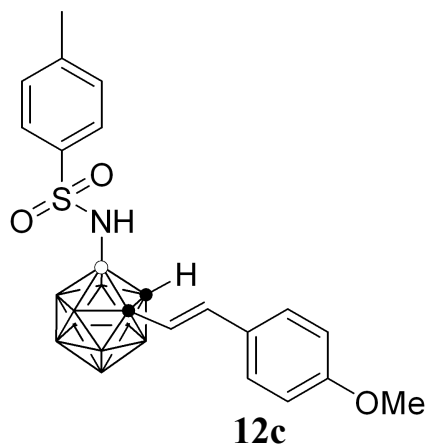

$^{33}\text{D}\}^3\text{J} ; \text{POT}^{\text{M}}34: \text{OJ} | .\text{EFEN}_3+$

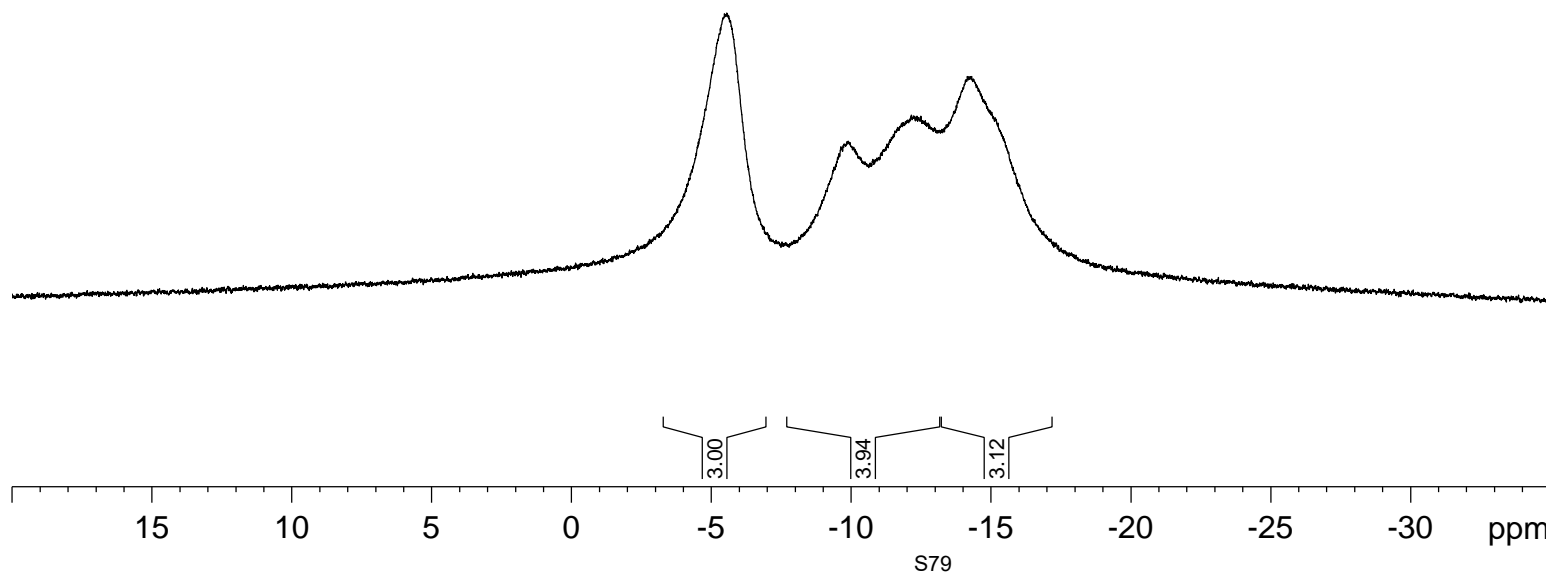

lhr-B-0568-1-cc-CDCl3(C)

Current Data Parameters  
NAME lhr-B-0568-1-cc-CDCl3(C)  
EXPNO 1  
PROCNO 1

F2 - Acquisition Parameters  
Date\_ 20161221  
Time 13.25 h  
INSTRUM spect  
PROBHD Z108618\_0257 (  
PULPROG zg  
TD 65536  
SOLVENT CDCl3  
NS 74  
DS 2  
SWH 24038.461 Hz  
FIDRES 0.366798 Hz  
AQ 1.3631488 sec  
RG 362  
DW 20.800 usec  
DE 6.50 usec  
TE 294.6 K  
D1 2.00000000 sec  
TD0 1  
SFO1 128.4096890 MHz  
NUC1 11B  
P1 7.50 usec  
PLW1 55.09999847 W

F2 - Processing parameters  
SI 32768  
SF 128.4097430 MHz  
WDW EM  
SSB 0  
LB 1.00 Hz  
GB 0  
PC 1.40

— -5.15  
— -9.11  
— -10.29  
— -13.44  
— -14.45

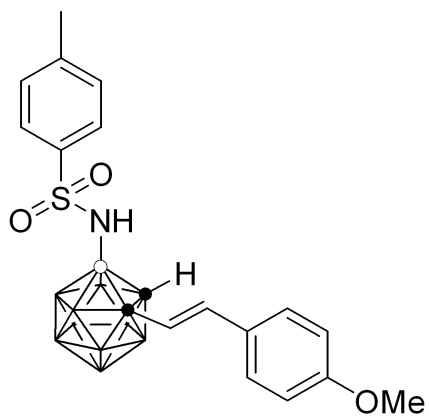

12c

$^{33}\text{D}'\text{POT}^{\text{M}}\text{34: 'OJ | . 'EFEn}_3^+$

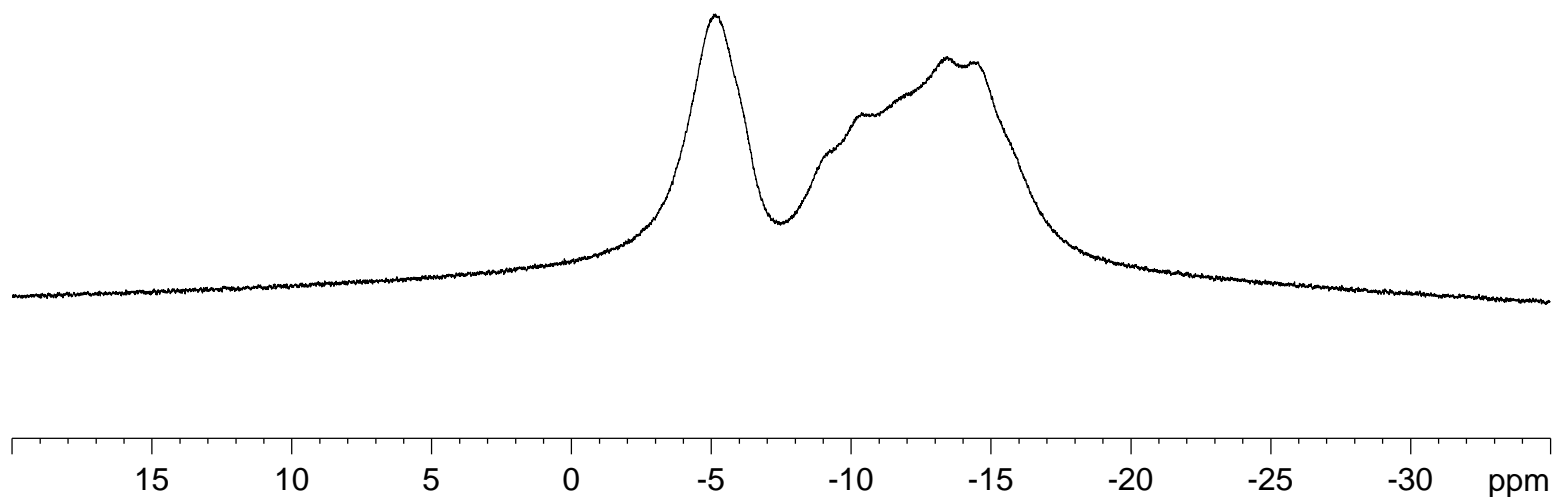

# Thermo QEFMS Analysis Report

## Analysis Info

|               |                                        |                |          |
|---------------|----------------------------------------|----------------|----------|
| Sample Name : | Lhr-0568-1                             | Reference No.: | Qzwx145  |
| Instrument :  | Q Exactive Focus Orbitrap              |                |          |
| Source :      | HESI II                                | Polarity :     | Positive |
| Comment :     | ESI pos, 3.5kV, by LC, with sheath gas |                |          |

## Accurate Mass Measurement

|                                         |                                                                   |
|-----------------------------------------|-------------------------------------------------------------------|
| Molecular formula :                     | C <sub>18</sub> H <sub>27</sub> B <sub>10</sub> NO <sub>3</sub> S |
| Experimental Mass [M+Na] <sup>+</sup> : | 468.26081                                                         |
| Theoretical Mass [M+Na] <sup>+</sup> :  | 468.26165                                                         |
| Error (ppm) :                           | 1.7                                                               |

D:\Raw data\qzwx145

03/09/17 17:12:03

qzwx145 #77 RT: 0.35 AV: 1 SB: 135 0.16-0.33, 0.59-1.02 NL: 1.25E7  
T: FTMS + p ESI Full ms [120.0000-1000.0000]

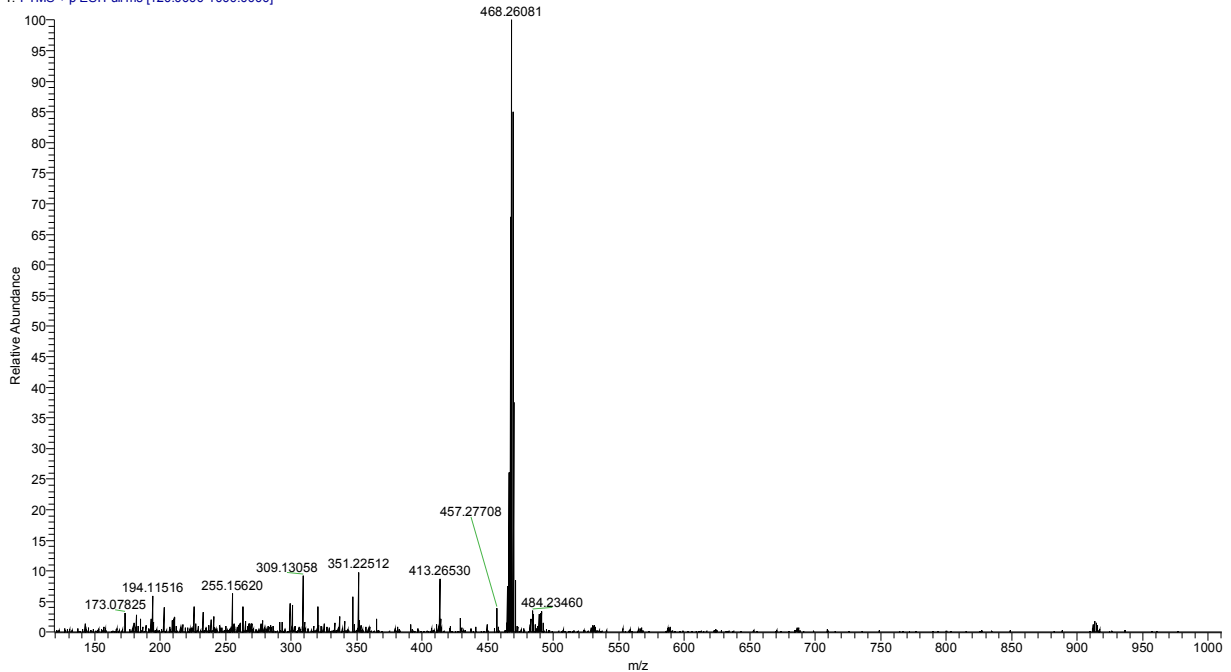

qzwx145 #77 RT: 0.35 AV: 1 SB: 135 0.16-0.33, 0.59-1.02 NL: 1.25E7  
T: FTMS + p ESI Full ms [120.0000-1000.0000]

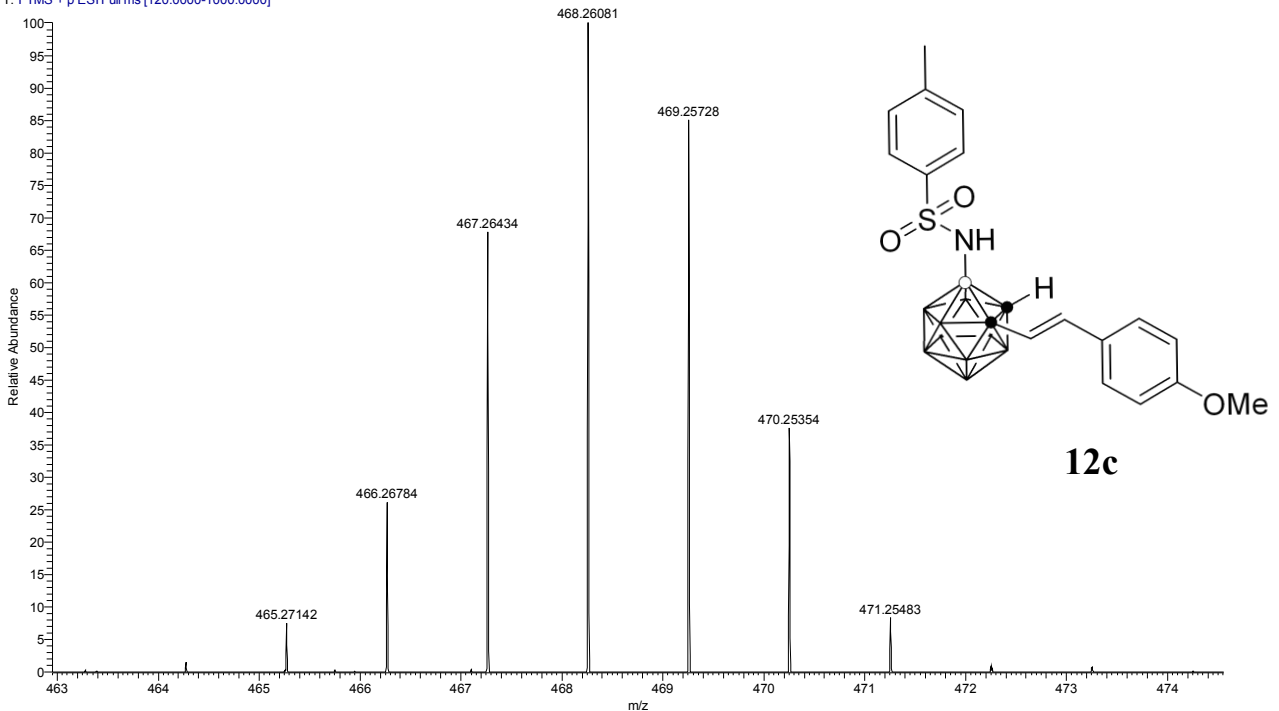

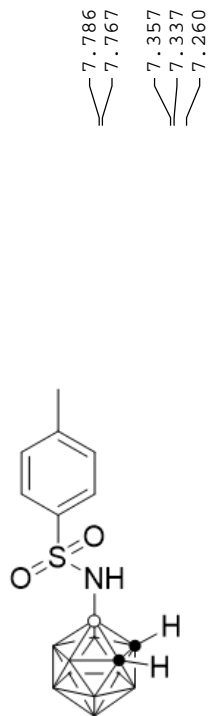

**13c**

$^3\text{J } ^1\text{POT}^{\text{M}}622^{\text{OJ}} | .^{\text{E}}\text{FEn}_{\text{5}}^+$

7.786  
7.767

7.357  
7.337  
7.260

5.357

4.085

2.455

1.601

lhr-H-0562-3-cc-CDCl3

Bruker Advance III 400

Current Data Parameters  
NAME lhr-H-0562-3-cc-CDCl3  
EXPNO 1  
PROCNO 1

F2 - Acquisition Parameters  
Date\_ 20161215  
Time 17.23 h  
INSTRUM spect  
PROBHD z824601\_0021 (  
PULPROG zg30  
TD 65536  
SOLVENT CDCl3  
NS 8  
DS 2  
SWH 8012.820 Hz  
FIDRES 0.122266 Hz  
AQ 4.0894465 sec  
RG 203  
DW 62.400 usec  
DE 6.50 usec  
TE 296.1 K  
D1 1.00000000 sec  
TD0 1  
SFO1 400.1324708 MHz  
NUC1 1H  
P1 15.00 usec  
PLW1 8.31000042 W

F2 - Processing parameters  
SI 65536  
SF 400.1300100 MHz  
WDW EM  
SSB 0  
LB 0.30 Hz  
GB 0  
PC 1.00

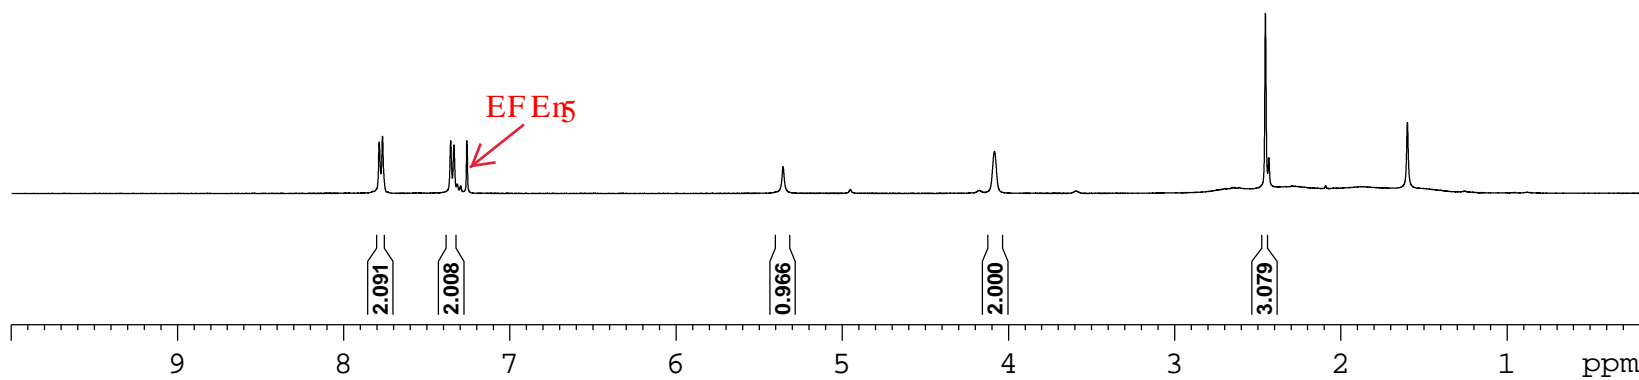

Bruker Advance III 400

Current Data Parameters  
 NAME lhr-C-0562-3-cc-CDC13  
 EXPNO 1  
 PROCNO 1

F2 - Acquisition Parameters  
 Date\_ 20161215  
 Time 17.26 h  
 INSTRUM spect  
 PROBHD Z824601\_0021 (  
 PULPROG zgpg30  
 TD 65536  
 SOLVENT CDC13  
 NS 1184  
 DS 4  
 SWH 24038.461 Hz  
 FIDRES 0.366798 Hz  
 AQ 1.3631488 sec  
 RG 203  
 DW 20.800 usec  
 DE 6.50 usec  
 TE 296.5 K  
 D1 2.00000000 sec  
 D11 0.03000000 sec  
 TD0 1  
 SFO1 100.6228298 MHz  
 NUC1 13C  
 P1 9.50 usec  
 PLW1 41.25000000 W  
 SFO2 400.1316005 MHz  
 NUC2 1H  
 CPDPRG[2] waltz16  
 PCPD2 90.00 usec  
 PLW2 8.31000042 W  
 PLW12 0.23083000 W  
 PLW13 0.11611000 W

F2 - Processing parameters  
 SI 32768  
 SF 100.6127548 MHz  
 WDW EM  
 SSB 0  
 LB 1.00 Hz  
 GB 0  
 PC 1.40

144.311  
 138.157  
 130.078  
 126.644

77.478  
 77.160  
 76.843

56.487

21.747

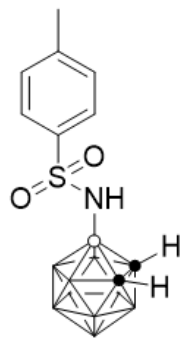

13c

$^{35}\text{E}\}^3\text{J} ; \text{'POT'}^*322'\text{OJ} | .\text{'EFE}\eta_3+$

EFE $\eta_3$

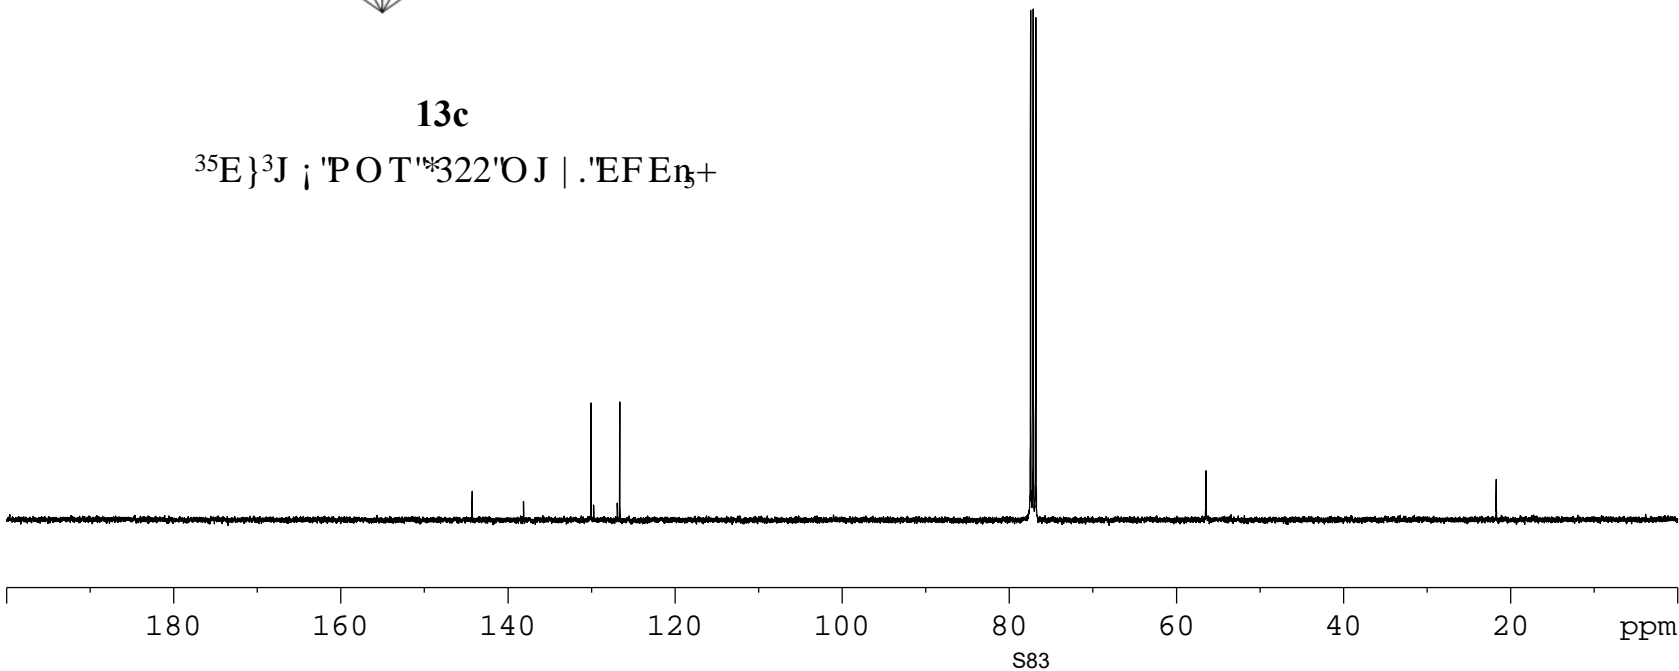

1hr-B-0562-3-cc-CDCl3

Current Data Parameters  
NAME 1hr-B-0562-3-cc-CDCl3  
EXPNO 1  
PROCNO 1

F2 - Acquisition Parameters  
Date\_ 20161216  
Time 10.32 h  
INSTRUM spect  
PROBHD z108618\_0257 (  
PULPROG zgdc  
TD 65536  
SOLVENT C6D6  
NS 21  
DS 4  
SWH 24038.461 Hz  
FIDRES 0.366798 Hz  
AQ 1.3631488 sec  
RG 287  
DW 20.800 usec  
DE 6.50 usec  
TE 296.3 K  
D1 2.0000000 sec  
D11 0.03000000 sec  
TD0 1  
SFO1 128.4096890 MHz  
NUC1 11B  
P1 7.50 usec  
PLW1 55.09999847 W  
SFO2 400.2316009 MHz  
NUC2 1H  
CPDPRG[2] waltz16  
PCPD2 90.00 usec  
PLW2 13.56000042 W  
PLW12 0.27428001 W

F2 - Processing parameters  
SI 32768  
SF 128.4097615 MHz  
WDW EM  
SSB 0  
LB 1.00 Hz  
GB 0  
PC 1.40

— -3.90  
— -6.91  
— -10.35  
— -14.50

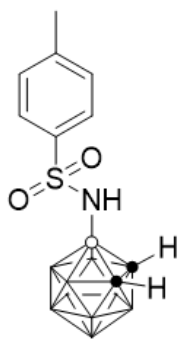

13c

$^{33}\text{D}\}^{3}\text{J}$  ; 'POT' 34: 'OJ |.'EFEn<sub>3</sub>+

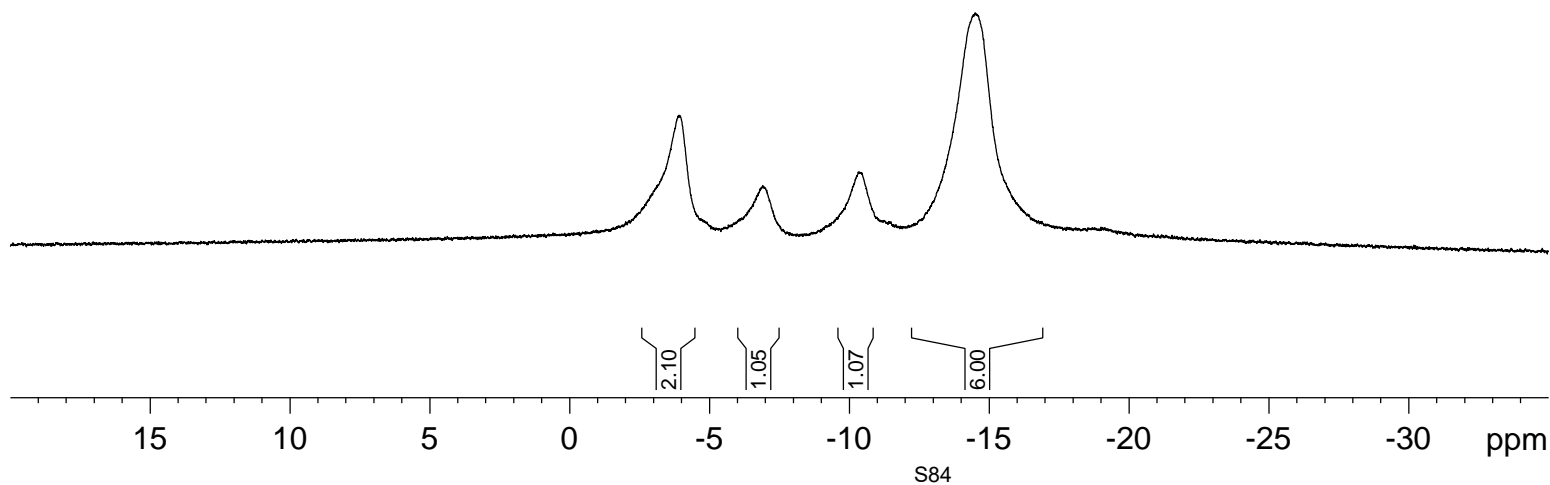



lhr-B-0562-3-cc-CDCl3(C)

Current Data Parameters  
NAME lhr-B-0562-3-cc-CDCl3(C)  
EXPNO 1  
PROCNO 1

F2 - Acquisition Parameters  
Date\_ 20161216  
Time 10.34 h  
INSTRUM spect  
PROBHD Z108618\_0257 (  
PULPROG zg  
TD 65536  
SOLVENT C6D6  
NS 34  
DS 2  
SWH 24038.461 Hz  
FIDRES 0.366798 Hz  
AQ 1.3631488 sec  
RG 362  
DW 20.800 usec  
DE 6.50 usec  
TE 296.0 K  
D1 2.00000000 sec  
TD0 1  
SFO1 128.4096890 MHz  
NUC1 11B  
P1 7.50 usec  
PLW1 55.09999847 W

F2 - Processing parameters  
SI 32768  
SF 128.4097430 MHz  
WDW EM  
SSB 0  
LB 1.00 Hz  
GB 0  
PC 1.40

— 3.15  
— 4.31  
— 6.75  
— 9.64  
— 10.79  
— 13.90  
— 14.78

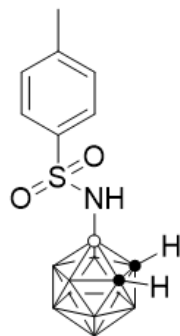

13c

$^{33}\text{D}'\text{POT}^{\#34}: \text{'OJ} | \text{'EFE}_{\text{B}}^{\text{+}}$

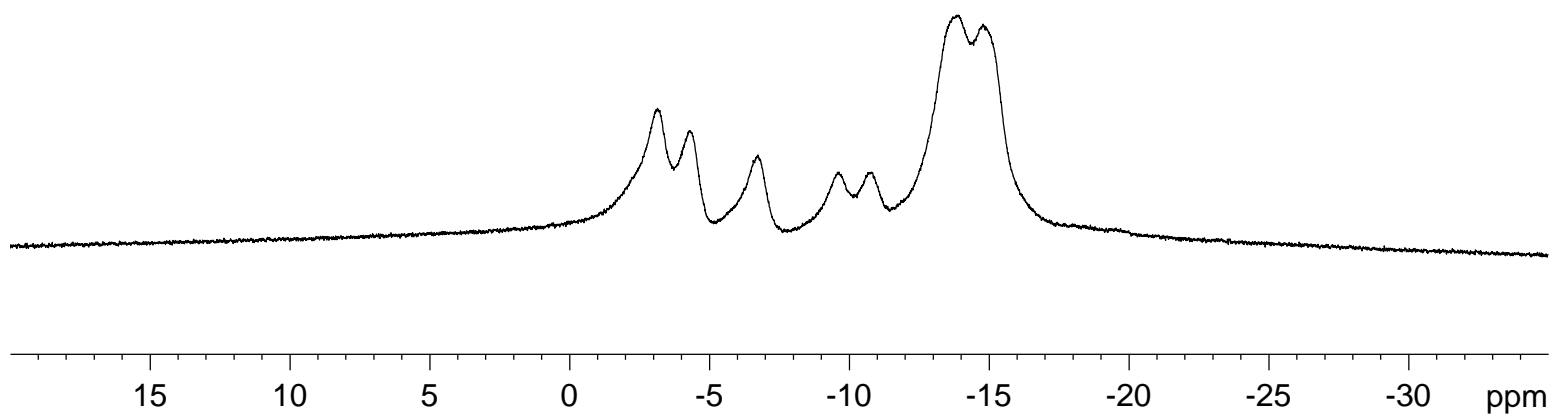

# Thermo QEFMS Analysis Report

## Analysis Info

|               |                                         |                |          |
|---------------|-----------------------------------------|----------------|----------|
| Sample Name : | Lhr-0562-3                              | Reference No.: | Qzwx143  |
| Instrument :  | Q Exactive Focus Orbitrap               |                |          |
| Source :      | APCI                                    | Polarity :     | Negative |
| Comment :     | APCI neg, 5.0uA, by LC, with sheath gas |                |          |

## Accurate Mass Measurement

|                                        |                                                                  |
|----------------------------------------|------------------------------------------------------------------|
| Molecular formula :                    | C <sub>9</sub> H <sub>19</sub> B <sub>10</sub> NO <sub>2</sub> S |
| Experimental Mass [M-H] <sup>-</sup> : | 312.20667                                                        |
| Theoretical Mass [M-H] <sup>-</sup> :  | 312.20721                                                        |
| Error (ppm) :                          | 1.7                                                              |

D:\Raw data\qzwx143\_170310153132

03/10/17 15:32:37

qzwx143\_170310153132 #74 RT: 0.34 AV: 1 SB: 140 0.09-0.32, 0.51-0.92 NL: 1.06E6  
T: FTMS - p APCI corona Full ms [100.0000-800.0000]

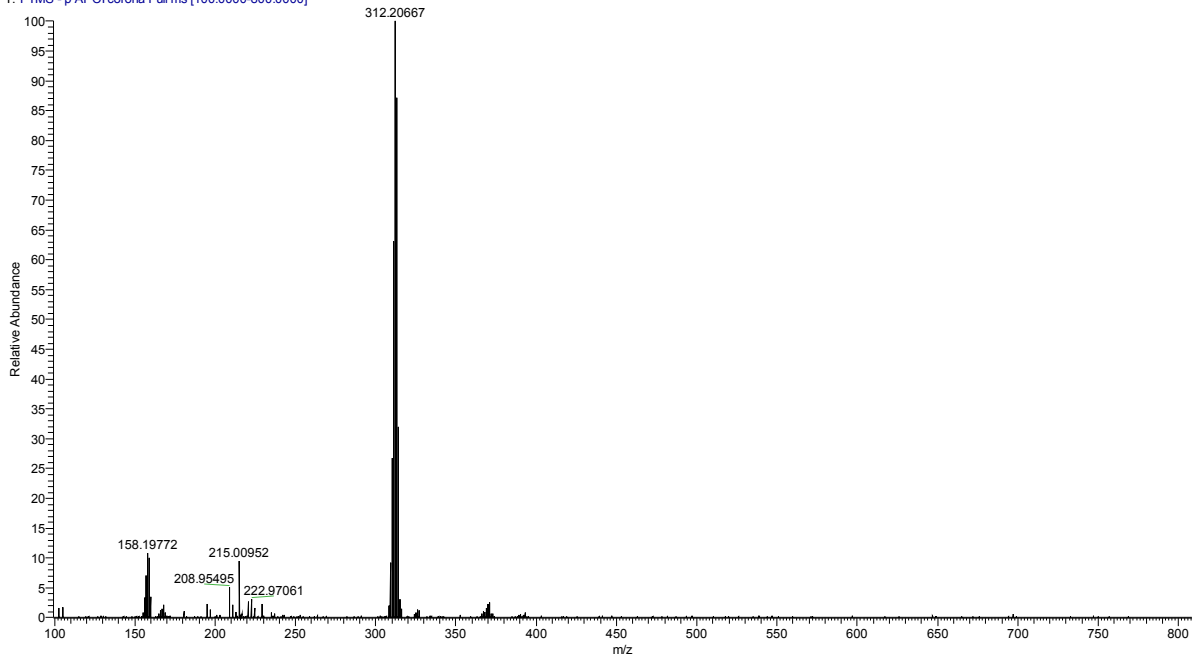

qzwx143\_170310153132 #74 RT: 0.34 AV: 1 SB: 140 0.09-0.32, 0.51-0.92 NL: 1.06E6  
T: FTMS - p APCI corona Full ms [100.0000-800.0000]

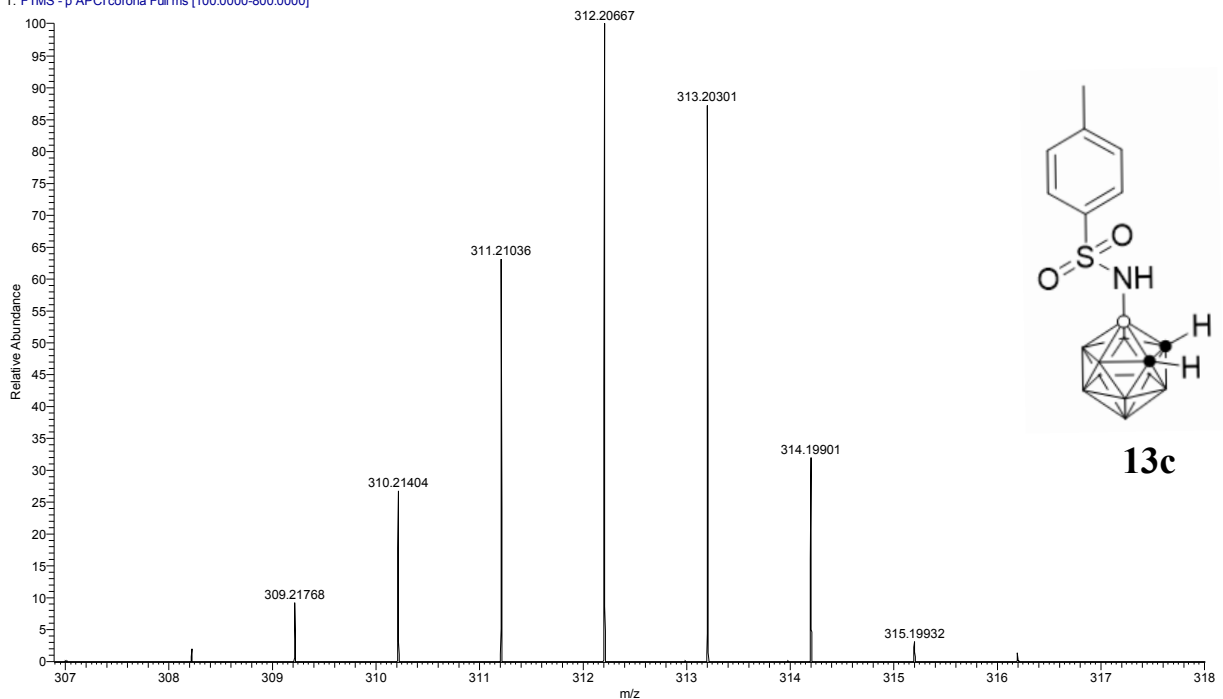

7.260  
7.210  
7.191  
7.170  
6.967  
6.948  
6.816  
6.797  
6.779

3.738

2.029

1hr-H-0392-CDC13

Current Data Parameters  
NAME 1hr-H-0392-CDC13  
EXPNO 1  
PROCNO 1

F2 - Acquisition Parameters  
Date\_ 20160607  
Time 22.03 h  
INSTRUM spect  
PROBHD Z108618\_0257 (  
PULPROG zg30  
TD 65536  
SOLVENT CDC13  
NS 9  
DS 2  
SWH 8012.820 Hz  
FIDRES 0.122266 Hz  
AQ 4.0894465 sec  
RG 45.2  
DW 62.400 usec  
DE 6.50 usec  
TE 294.9 K  
D1 1.00000000 sec  
TD0 1  
SFO1 400.2324714 MHz  
NUC1 1H  
P1 12.80 usec  
PLW1 13.56000042 W

F2 - Processing parameters  
SI 65536  
SF 400.2300104 MHz  
WDW EM  
SSB 0  
LB 0.30 Hz  
GB 0  
PC 1.00

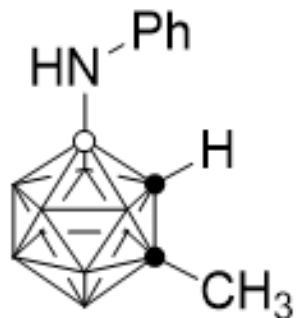

**1d**

<sup>1</sup>H NMR (400 MHz, CDCl<sub>3</sub>)

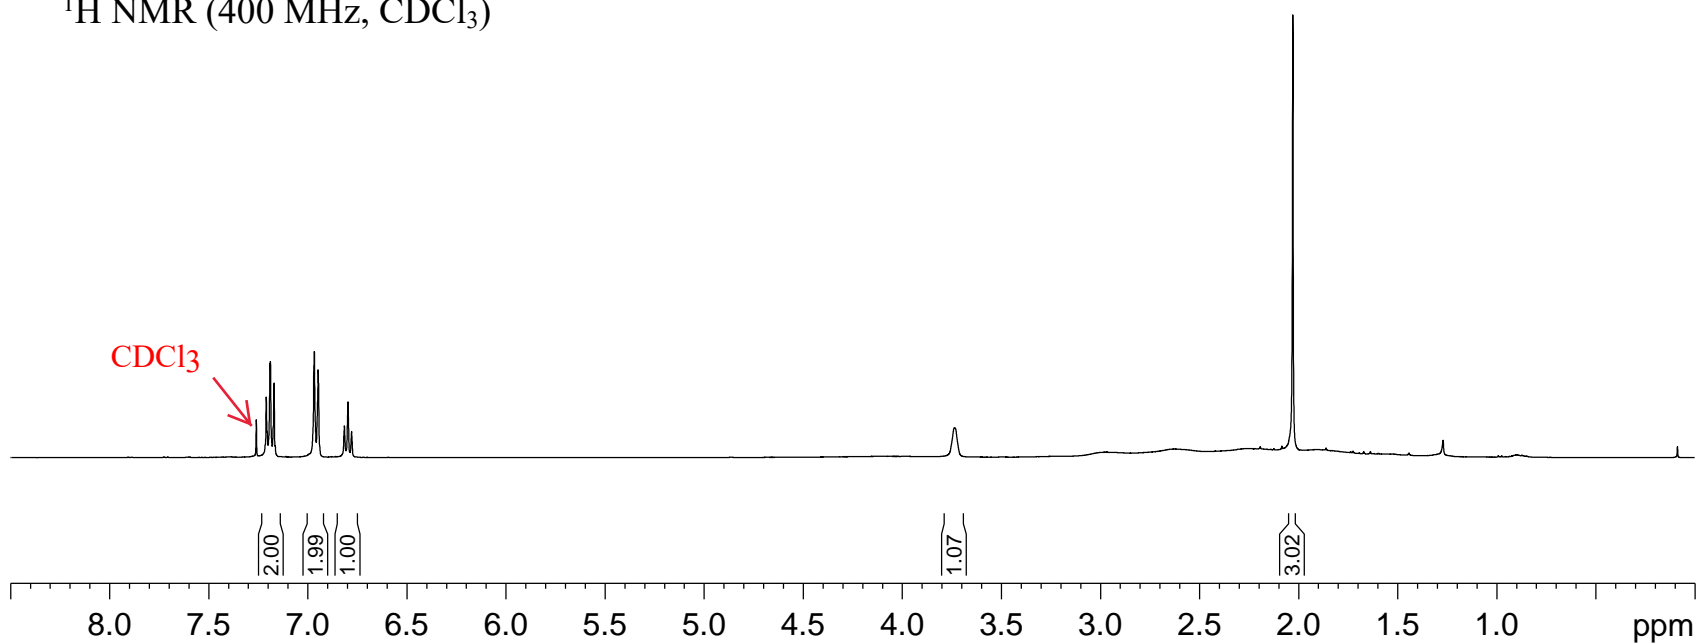

lhr-C-0392-CDC13

Current Data Parameters  
NAME lhr-C-0392-CDC13  
EXPNO 1  
PROCNO 1

F2 - Acquisition Parameters  
Date\_ 20160608  
Time 21.07 h  
INSTRUM spect  
PROBHD Z108618\_0257 (  
PULPROG zgpg30  
TD 65536  
SOLVENT CDC13  
NS 148  
DS 4  
SWH 29761.904 Hz  
FIDRES 0.454131 Hz  
AQ 1.1010048 sec  
RG 90.5  
DW 16.800 usec  
DE 6.50 usec  
TE 297.0 K  
D1 2.0000000 sec  
D11 0.0300000 sec  
TD0 1  
SFO1 100.6479773 MHz  
NUC1 13C  
P1 9.50 usec  
PLW1 55.3400015 W  
SFO2 400.2316009 MHz  
NUC2 1H  
CPDPRG[2] waltz16  
PCPD2 90.00 usec  
PLW2 13.56000042 W  
PLW12 0.27428001 W  
PLW13 0.13796000 W

F2 - Processing parameters  
SI 32768  
SF 100.6379040 MHz  
WDW EM  
SSB 0  
LB 1.00 Hz  
GB 0  
PC 1.40

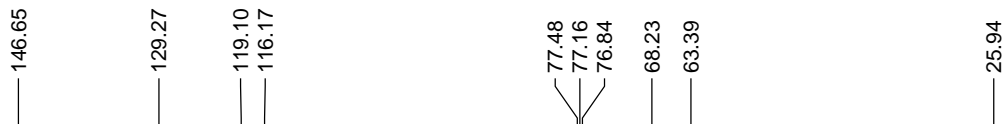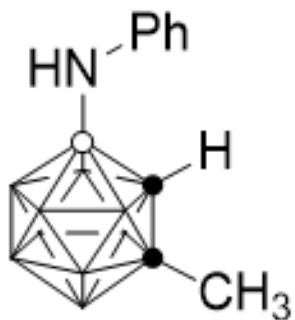

**1d**

$^{13}\text{C}\{^1\text{H}\}$  NMR (100 MHz,  $\text{CDCl}_3$ )

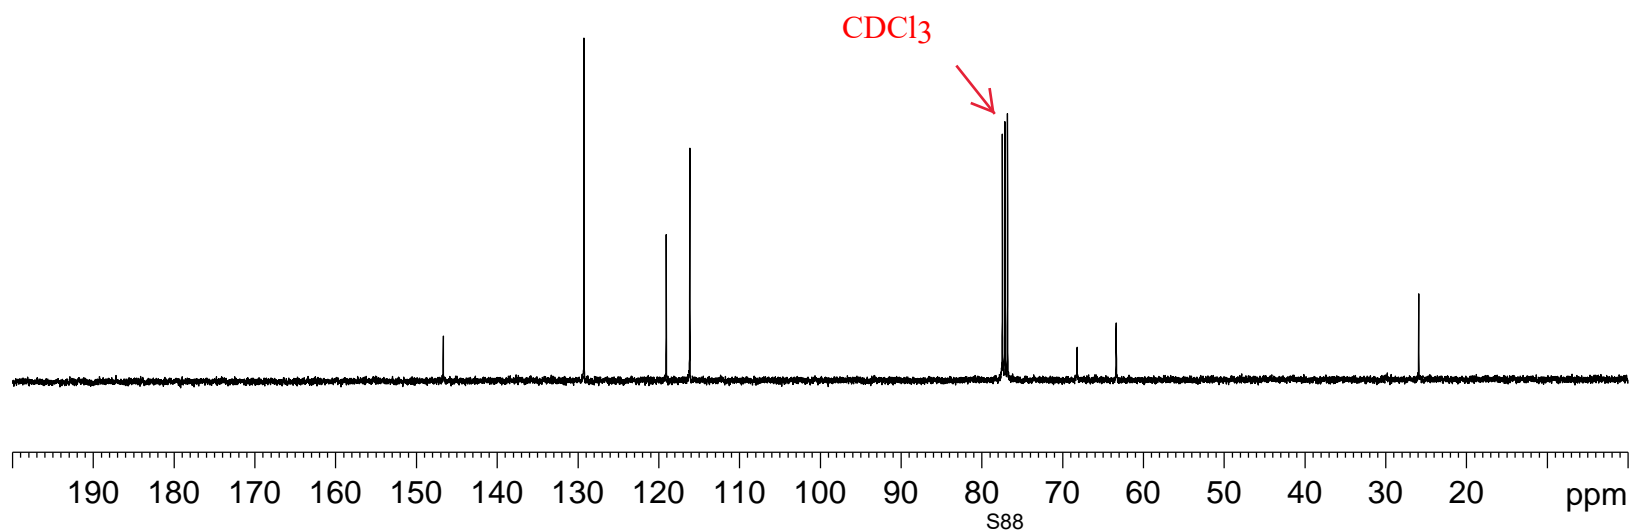

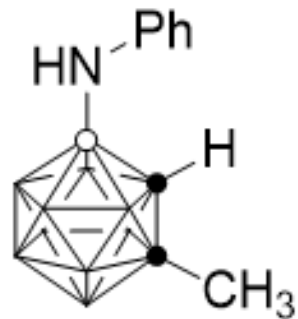

**1d**

$^{11}\text{B}\{^1\text{H}\}$  NMR (128 MHz,  $\text{CDCl}_3$ )

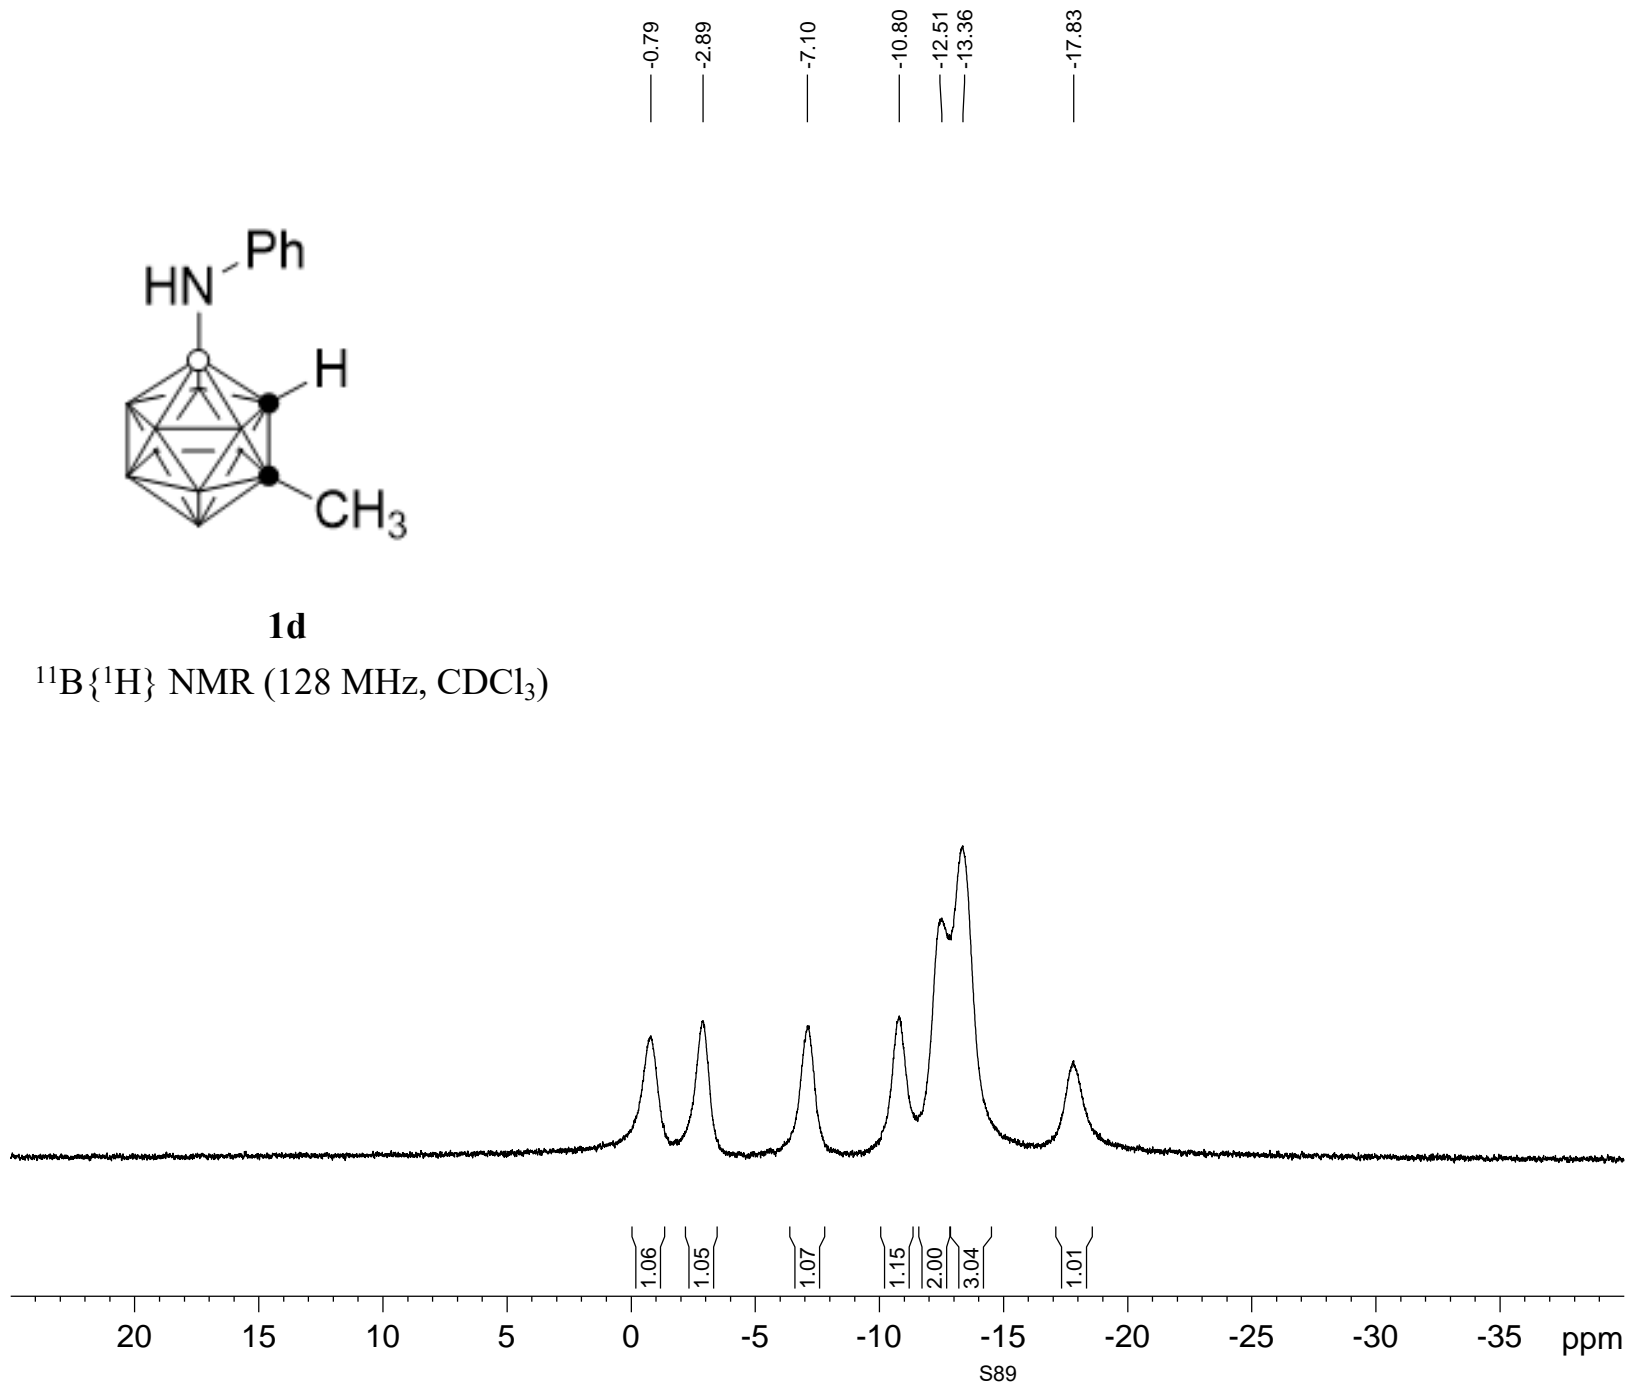

1hr-B-0392-CDC13

Current Data Parameters  
 NAME 1hr-B-0392-CDC13  
 EXPNO 1  
 PROCNO 1

F2 - Acquisition Parameters  
 Date\_ 20160607  
 Time 22.11 h  
 INSTRUM spect  
 PROBHD Z108618\_0257 (  
 PULPROG zgdc  
 TD 65536  
 SOLVENT CDC13  
 NS 16  
 DS 4  
 SWH 24038.461 Hz  
 FIDRES 0.366798 Hz  
 AQ 1.3631488 sec  
 RG 1  
 DW 20.800 usec  
 DE 6.50 usec  
 TE 295.7 K  
 D1 2.00000000 sec  
 D11 0.03000000 sec  
 TD0 1  
 SFO1 128.4096890 MHz  
 NUC1  $^{11}\text{B}$   
 P1 7.50 usec  
 PLW1 55.09999847 W  
 SFO2 400.2316009 MHz  
 NUC2  $^1\text{H}$   
 CPDPRG[2] waltz16  
 PCPD2 90.00 usec  
 PLW2 13.56000042 W  
 PLW12 0.27428001 W

F2 - Processing parameters  
 SI 32768  
 SF 128.4097615 MHz  
 WDW EM  
 SSB 0  
 LB 1.00 Hz  
 GB 0  
 PC 1.40

1hr-B-0392-CDC13(C)

Current Data Parameters  
NAME 1hr-B-0392-CDC13(C)  
EXPNO 1  
PROCNO 1

F2 - Acquisition Parameters  
Date\_ 20160607  
Time 22.13 h  
INSTRUM spect  
PROBHD Z108618\_0257 (  
PULPROG zg  
TD 65536  
SOLVENT CDCl3  
NS 24  
DS 2  
SWH 24038.461 Hz  
FIDRES 0.366798 Hz  
AQ 1.3631488 sec  
RG 1  
DW 20.800 usec  
DE 6.50 usec  
TE 295.3 K  
D1 2.00000000 sec  
TD0 1  
SF01 128.4096890 MHz  
NUC1 11B  
P1 7.50 usec  
PLW1 55.09999847 W

F2 - Processing parameters  
SI 32768  
SF 128.4097430 MHz  
WDW EM  
SSB 0  
LB 1.00 Hz  
GB 0  
PC 1.40

Chemical shift values (ppm):  
-0.67  
-2.14  
-3.30  
-6.39  
-7.53  
-10.08  
-11.66  
-12.71  
-13.78  
-17.05  
-18.24

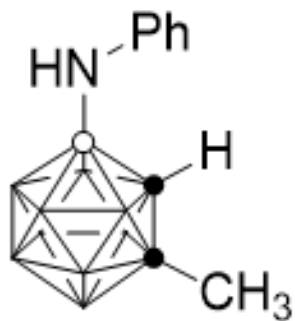

**1d**

$^{11}\text{B}$  NMR (128 MHz,  $\text{CDCl}_3$ )

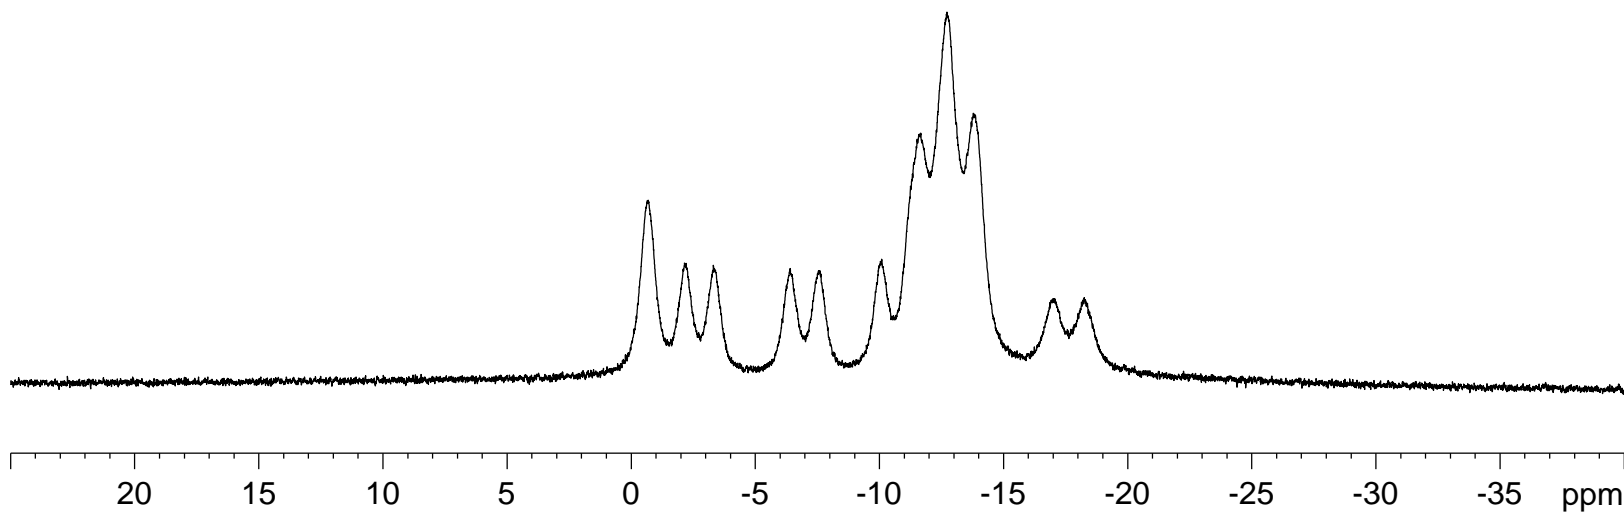

# Thermo QEFMS Analysis Report

## Analysis Info

|               |                                        |                |          |
|---------------|----------------------------------------|----------------|----------|
| Sample Name : | Lhr-392                                | Reference No.: | Qzwx057  |
| Instrument :  | Q Exactive Focus Orbitrap              |                |          |
| Source :      | HESI II                                | Polarity :     | Positive |
| Comment :     | ESI pos, 3.5kV, by LC, with sheath gas |                |          |

## Accurate Mass Measurement

|                                        |                                                  |
|----------------------------------------|--------------------------------------------------|
| Molecular formula :                    | C <sub>9</sub> H <sub>19</sub> B <sub>10</sub> N |
| Experimental Mass [M+H] <sup>+</sup> : | 250.25900                                        |
| Theoretical Mass [M+H] <sup>+</sup> :  | 250.25934                                        |
| Error (ppm) :                          | 1.3                                              |

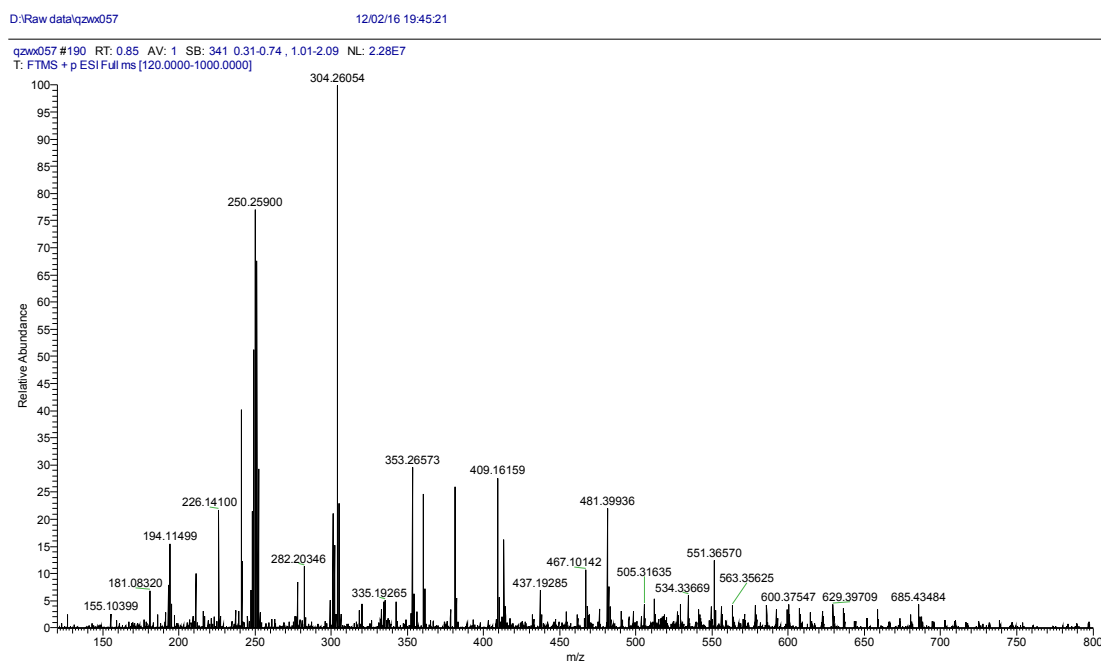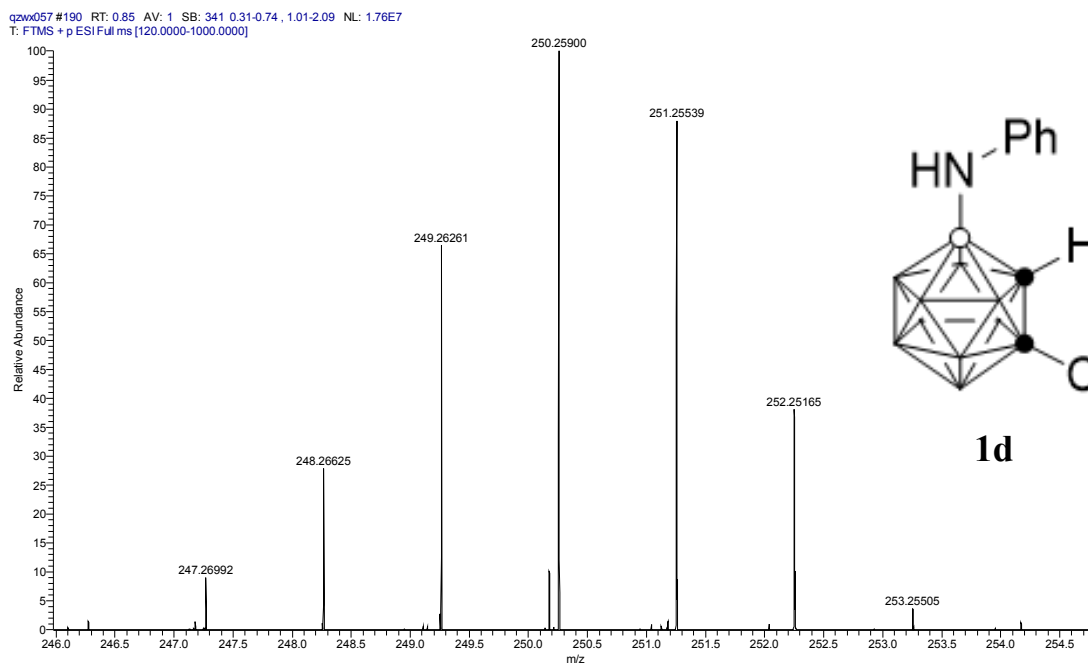

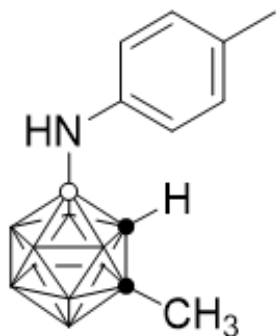

**2d**

<sup>1</sup>H NMR (400 MHz, CDCl<sub>3</sub>)

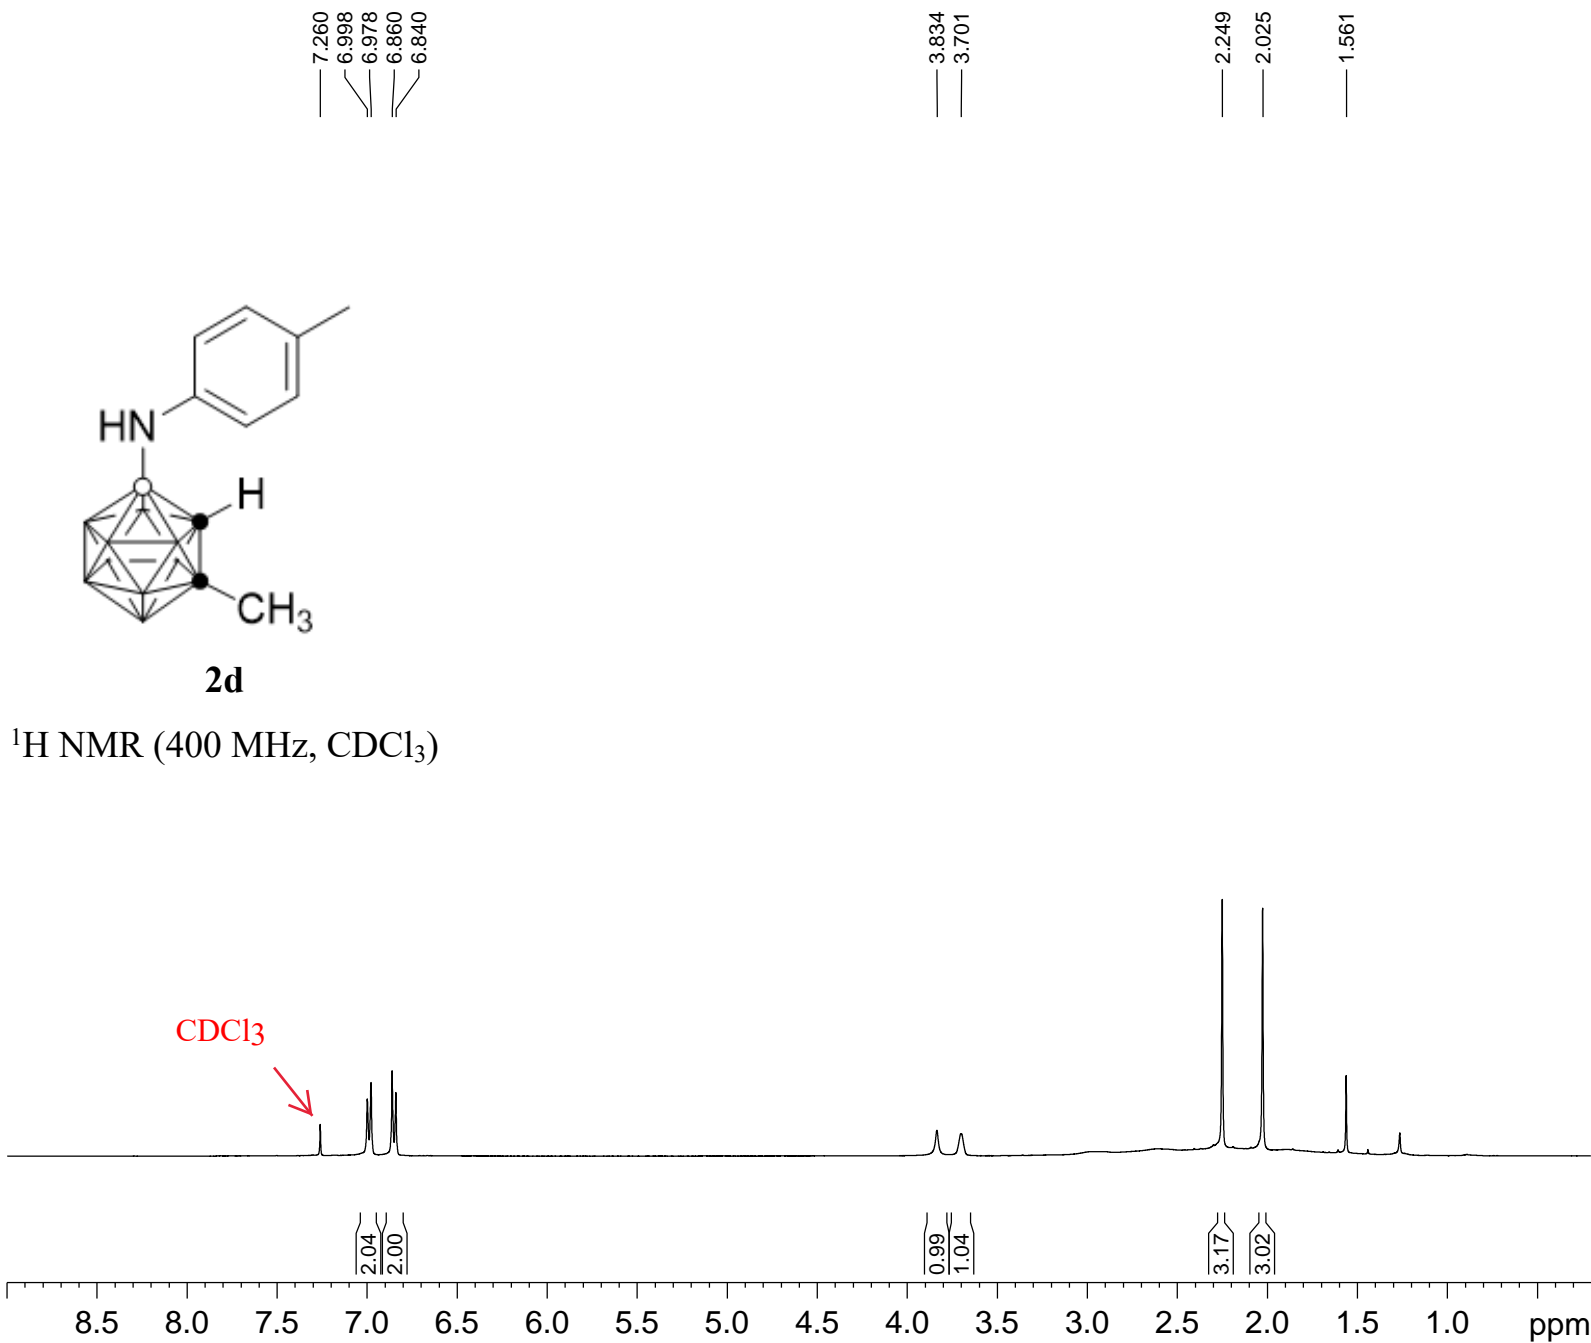

1hr-H-0513-phnhCH3-

Current Data Parameters  
 NAME 1hr-H-0513-phnhCH3-CD  
 EXPNO 1  
 PROCNO 1

F2 - Acquisition Parameters  
 Date\_ 20161101  
 Time 9.39 h  
 INSTRUM spect  
 PROBHD Z108618\_0257 (  
 PULPROG zg30  
 TD 65536  
 SOLVENT CDCl3  
 NS 12  
 DS 2  
 SWH 8012.820 Hz  
 FIDRES 0.122266 Hz  
 AQ 4.0894465 sec  
 RG 90.5  
 DW 62.400 usec  
 DE 6.50 usec  
 TE 296.6 K  
 D1 1.0000000 sec  
 TD0 1  
 SFO1 400.2324714 MHz  
 NUC1 1H  
 P1 12.80 usec  
 PLW1 13.56000042 W

F2 - Processing parameters  
 SI 65536  
 SF 400.2300094 MHz  
 WDW EM  
 SSB 0  
 LB 0.30 Hz  
 GB 0  
 PC 1.00



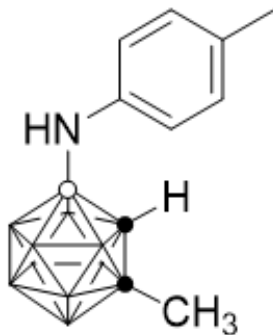

2d

$^{13}\text{C}\{^1\text{H}\}$  NMR (100 MHz,  $\text{CDCl}_3$ )

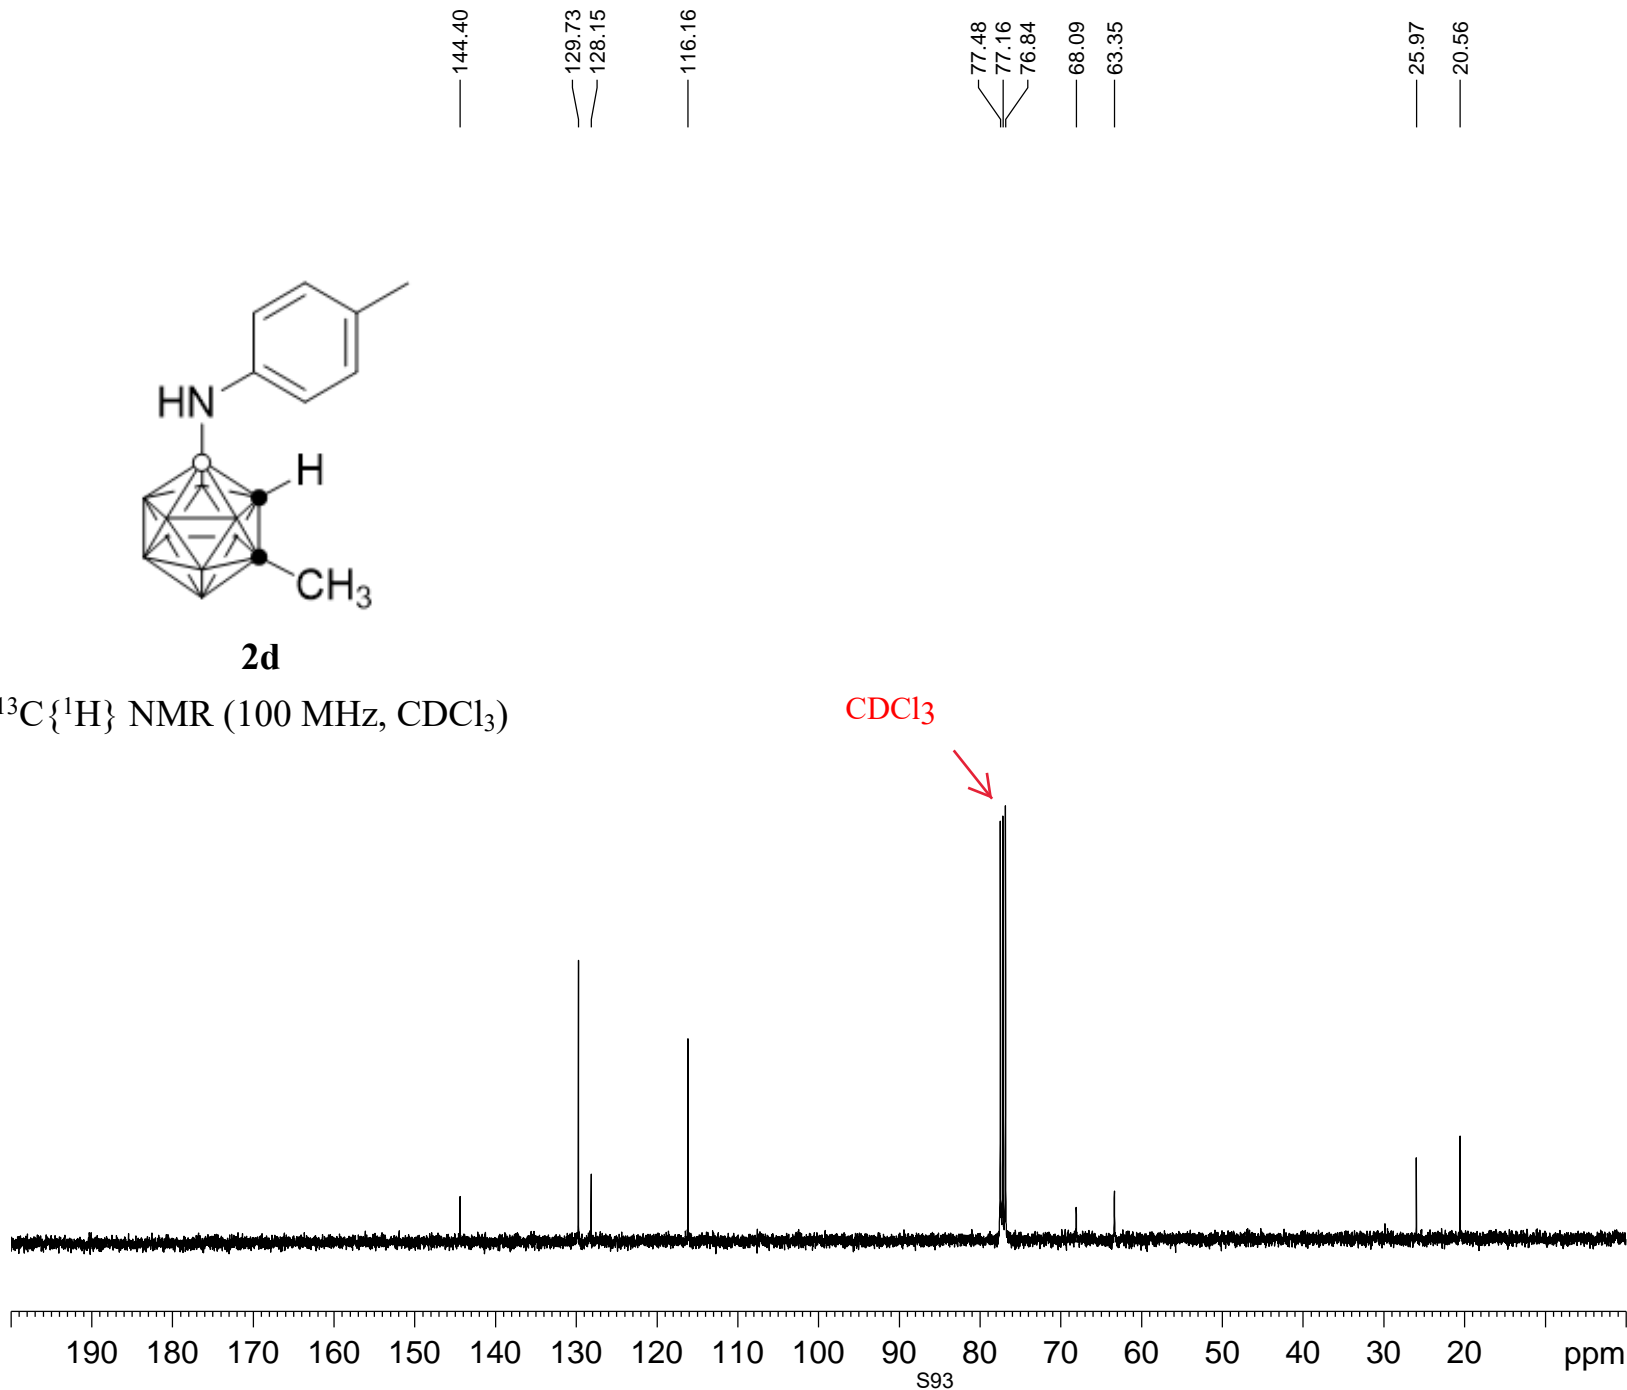

1hr-C-0513-phnhCH3-

Current Data Parameters  
 NAME 1hr-C-0513-phnhCH3-CDC13  
 EXPNO 1  
 PROCNO 1

F2 - Acquisition Parameters

Date\_ 20161101  
 Time 10.08 h  
 INSTRUM spect  
 PROBHD Z108618\_0257 (  
 PULPROG zgpg30  
 TD 65536  
 SOLVENT CDCl3  
 NS 100  
 DS 4  
 SWH 29761.904 Hz  
 FIDRES 0.454131 Hz  
 AQ 1.1010048 sec  
 RG 161  
 DW 16.800 usec  
 DE 6.50 usec  
 TE 296.8 K  
 D1 2.00000000 sec  
 D11 0.03000000 sec  
 TD0 1  
 SFO1 100.6479773 MHz  
 NUC1 13C  
 P1 9.50 usec  
 PLW1 55.34000015 W  
 SFO2 400.2316009 MHz  
 NUC2 1H  
 CPDPRG2 waltz16  
 PCPD2 90.00 usec  
 PLW2 13.56000042 W  
 PLW12 0.27428001 W  
 PLW13 0.13796000 W

F2 - Processing parameters  
 SI 32768  
 SF 100.6379014 MHz  
 WDW EM  
 SSB 0  
 LB 1.00 Hz  
 GB 0  
 PC 1.40

1hr-B-0513-phnhCH3-CDC13

Current Data Parameters  
NAME 1hr-B-0513-phnhCH3-CDC13  
EXPNO 1  
PROCNO 1

F2 - Acquisition Parameters  
Date\_ 20161101  
Time 9.51 h  
INSTRUM spect  
PROBHD Z108618\_0257 (  
PULPROG zgdc  
TD 65536  
SOLVENT C6D6  
NS 12  
DS 4  
SWH 24038.461 Hz  
FIDRES 0.366798 Hz  
AQ 1.3631488 sec  
RG 287  
DW 20.800 usec  
DE 6.50 usec  
TE 296.7 K  
D1 2.0000000 sec  
D11 0.0300000 sec  
TD0 1  
SFO1 128.4096890 MHz  
NUC1 11B  
P1 7.50 usec  
PLW1 55.09999847 W  
SFO2 400.2316009 MHz  
NUC2 1H  
CPDPRG[2] waltz16  
PCPD2 90.00 usec  
PLW2 13.56000042 W  
PLW12 0.27428001 W

F2 - Processing parameters  
SI 32768  
SF 128.4097615 MHz  
WDW EM  
SSB 0  
LB 1.00 Hz  
GB 0  
PC 1.40

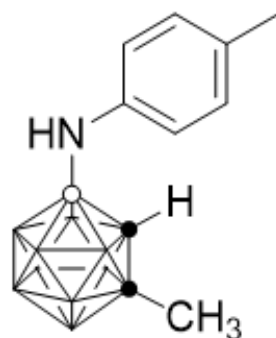

2d

<sup>11</sup>B{<sup>1</sup>H} NMR (128 MHz, CDCl<sub>3</sub>)

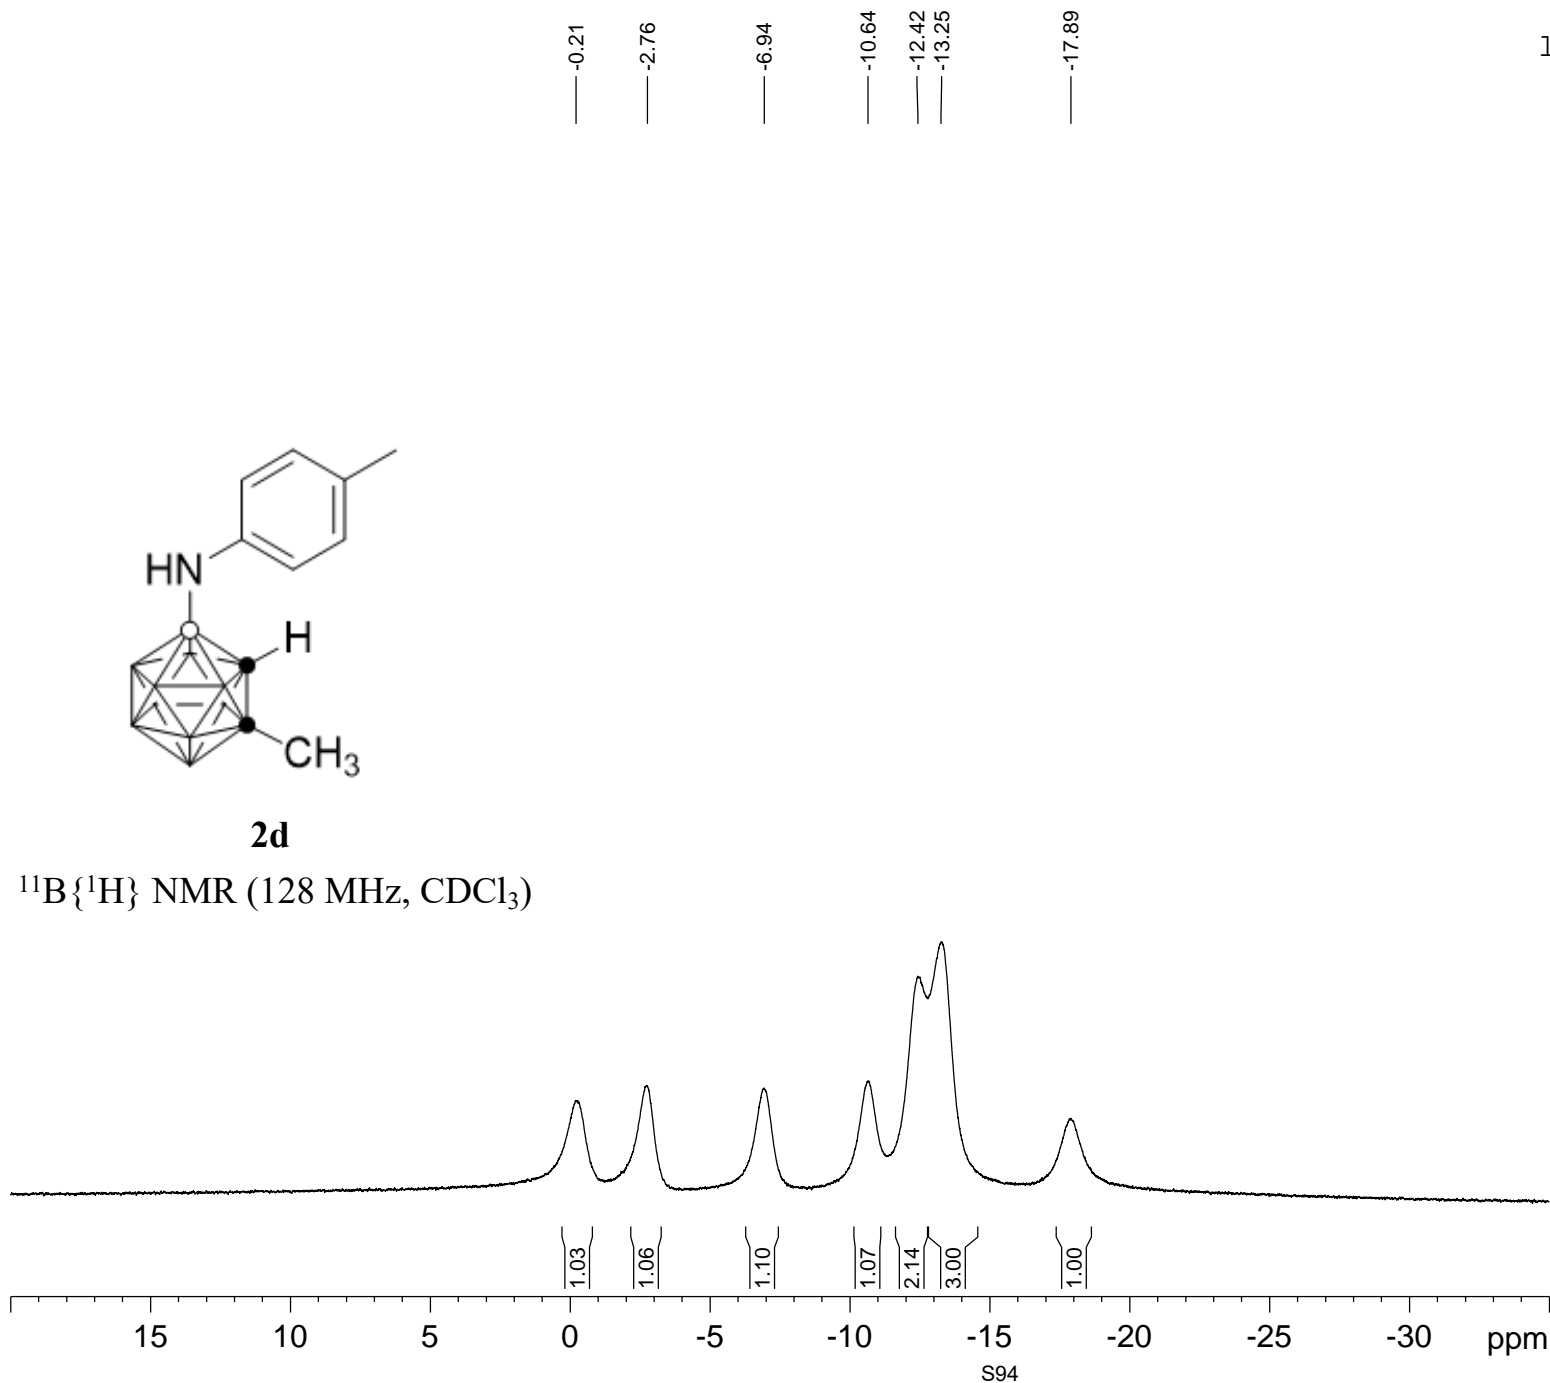

1hr-B-0513-phnhCH3-CDCl3(C)

Current Data Parameters  
NAME 1hr-B-0513-phnhCH3-CDCl3(C)  
EXPNO 1  
PROCNO 1

F2 - Acquisition Parameters  
Date\_ 20161101  
Time 9.52 h  
INSTRUM spect  
PROBHD z108618\_0257 ( )  
PULPROG zg  
TD 65536  
SOLVENT C6D6  
NS 16  
DS 2  
SWH 24038.461 Hz  
FIDRES 0.366798 Hz  
AQ 1.3631488 sec  
RG 287  
DW 20.800 usec  
DE 6.50 usec  
TE 296.5 K  
D1 2.00000000 sec  
TD0 1  
SFO1 128.4096890 MHz  
NUC1 11B  
P1 7.50 usec  
PLW1 55.09999847 W

F2 - Processing parameters  
SI 32768  
SF 128.4097504 MHz  
WDW EM  
SSB 0  
LB 1.00 Hz  
GB 0  
PC 1.40

— -0.16  
— -2.04  
— -3.27  
— -6.29  
— -7.39  
— -9.99  
— -11.71  
— -12.74  
— -13.80  
— -17.13  
— -18.40

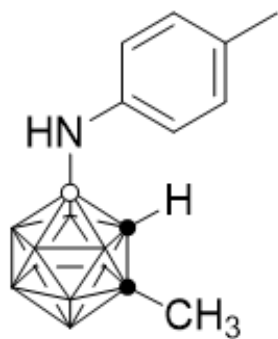

2d

<sup>11</sup>B NMR (128 MHz, CDCl<sub>3</sub>)

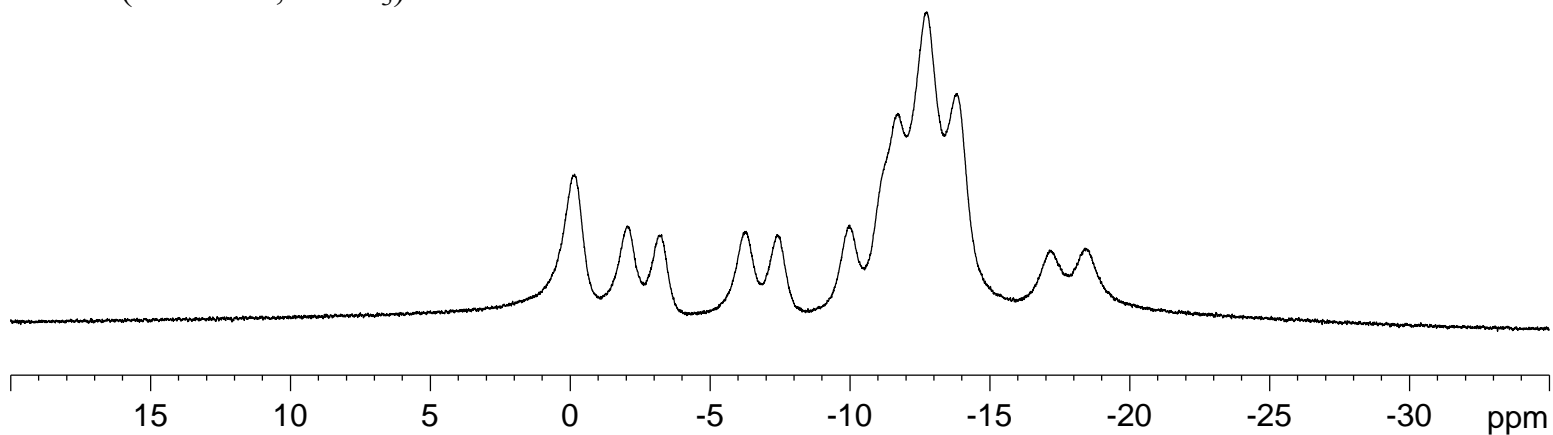

# Thermo QEFMS Analysis Report

## Analysis Info

|               |                                        |                |          |
|---------------|----------------------------------------|----------------|----------|
| Sample Name : | Lhr-513                                | Reference No.: | Qzwx058  |
| Instrument :  | Q Exactive Focus Orbitrap              |                |          |
| Source :      | HESI II                                | Polarity :     | Positive |
| Comment :     | ESI pos, 3.5kV, by LC, with sheath gas |                |          |

## Accurate Mass Measurement

|                                        |                                                   |
|----------------------------------------|---------------------------------------------------|
| Molecular formula :                    | C <sub>10</sub> H <sub>21</sub> B <sub>10</sub> N |
| Experimental Mass [M+H] <sup>+</sup> : | 264.27468                                         |
| Theoretical Mass [M+H] <sup>+</sup> :  | 264.27500                                         |
| Error (ppm) :                          | 1.2                                               |

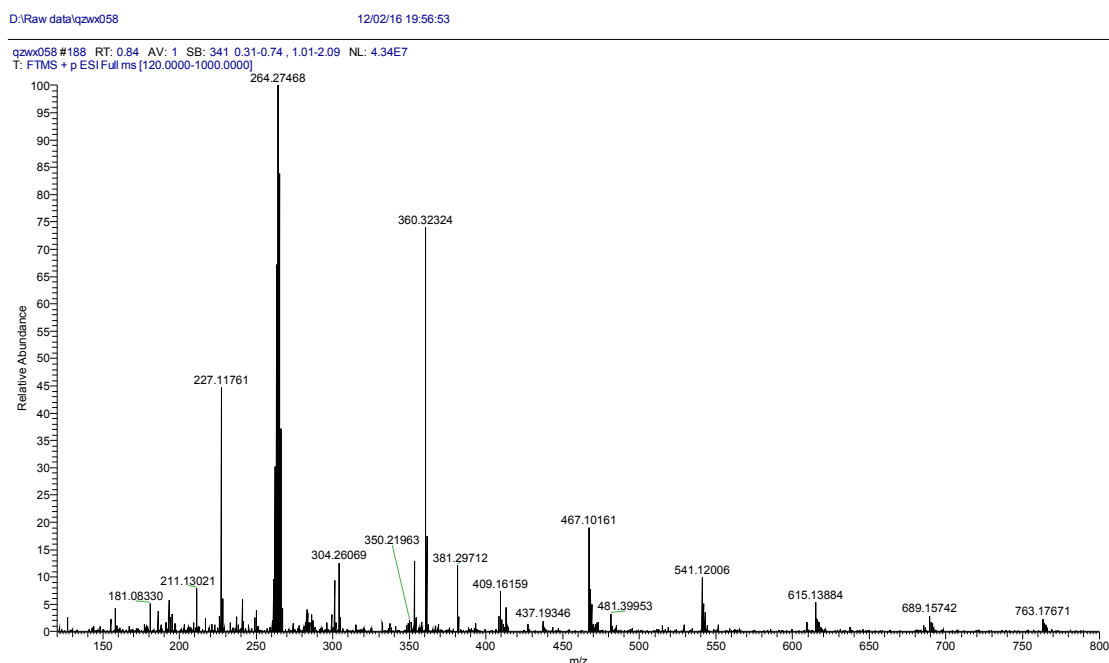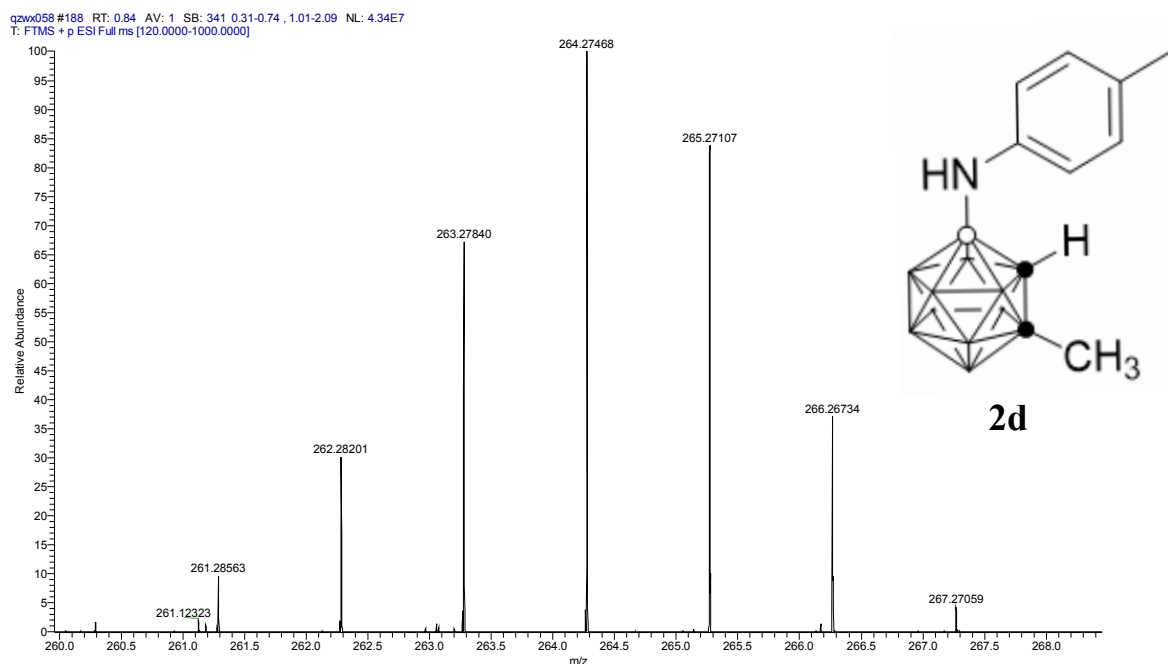

1hr-H-0397-2-clphnh-CDCl3

Current Data Parameters  
NAME 1hr-H-0397-2-clphnh-CD  
EXPNO 1  
PROCNO 1

F2 - Acquisition Parameters  
Date\_ 20160622  
Time 14.38 h  
INSTRUM spect  
PROBHD Z108618\_0257 (  
PULPROG zg30  
TD 65536  
SOLVENT CDCl3  
NS 8  
DS 2  
SWH 8012.820 Hz  
FIDRES 0.122266 Hz  
AQ 4.0894465 sec  
RG 128  
DW 62.400 usec  
DE 6.50 usec  
TE 294.7 K  
D1 1.00000000 sec  
TD0 1  
SFO1 400.2324714 MHz  
NUC1 1H  
P1 12.80 usec  
PLW1 13.56000042 W

F2 - Processing parameters  
SI 65536  
SF 400.230097 MHz  
WDW EM  
SSB 0  
LB 0.30 Hz  
GB 0  
PC 1.00

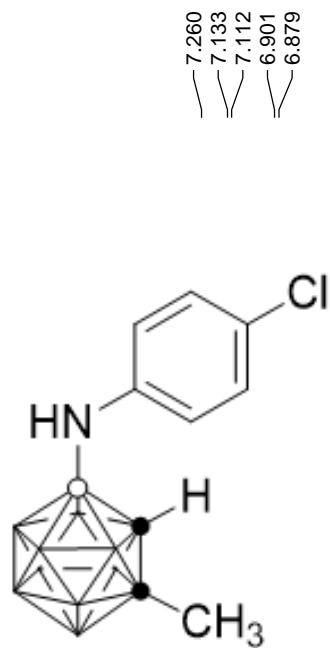

3d

<sup>1</sup>H NMR (400 MHz, CDCl<sub>3</sub>)

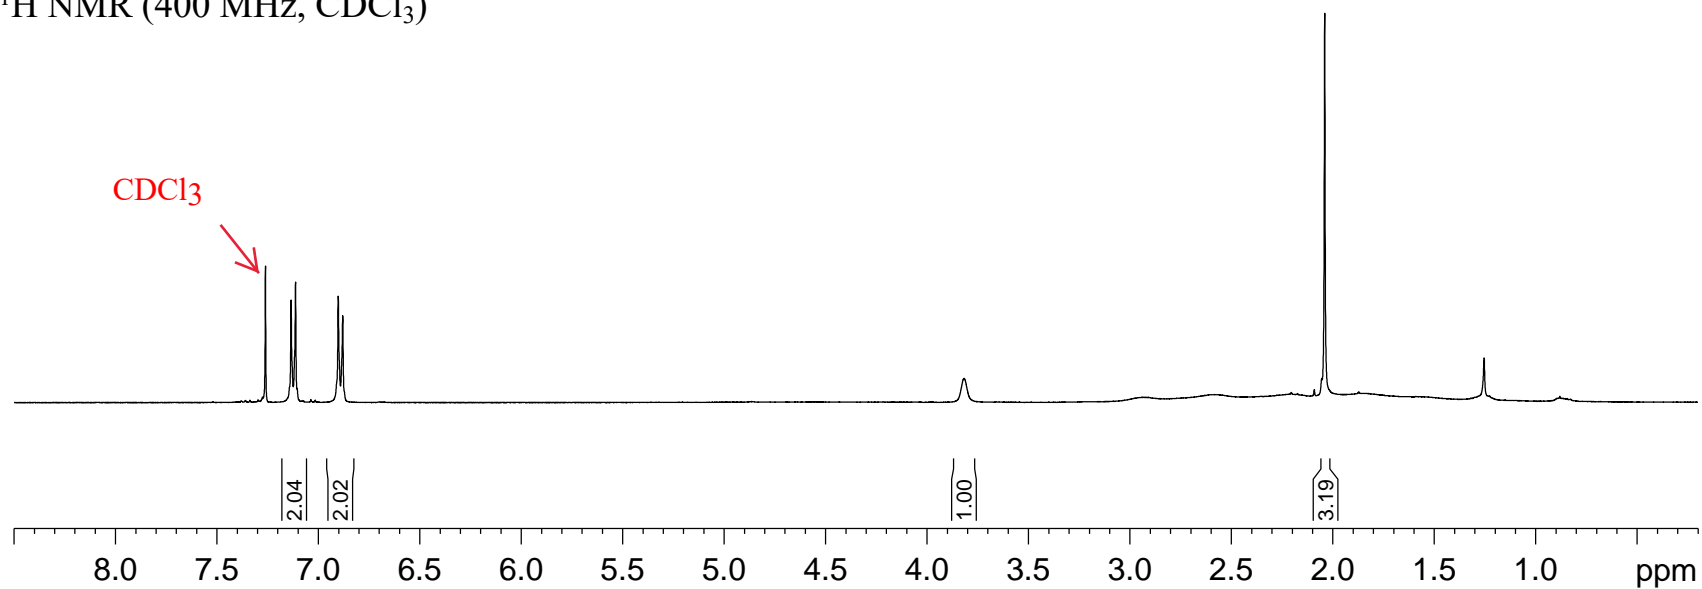

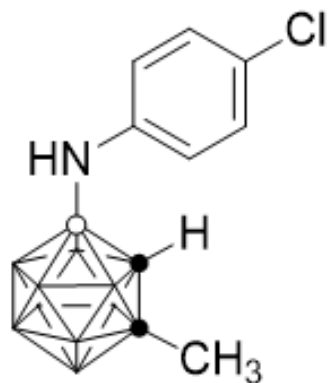

3d

$^{13}\text{C}\{^1\text{H}\}$  NMR (100 MHz,  $\text{CDCl}_3$ )

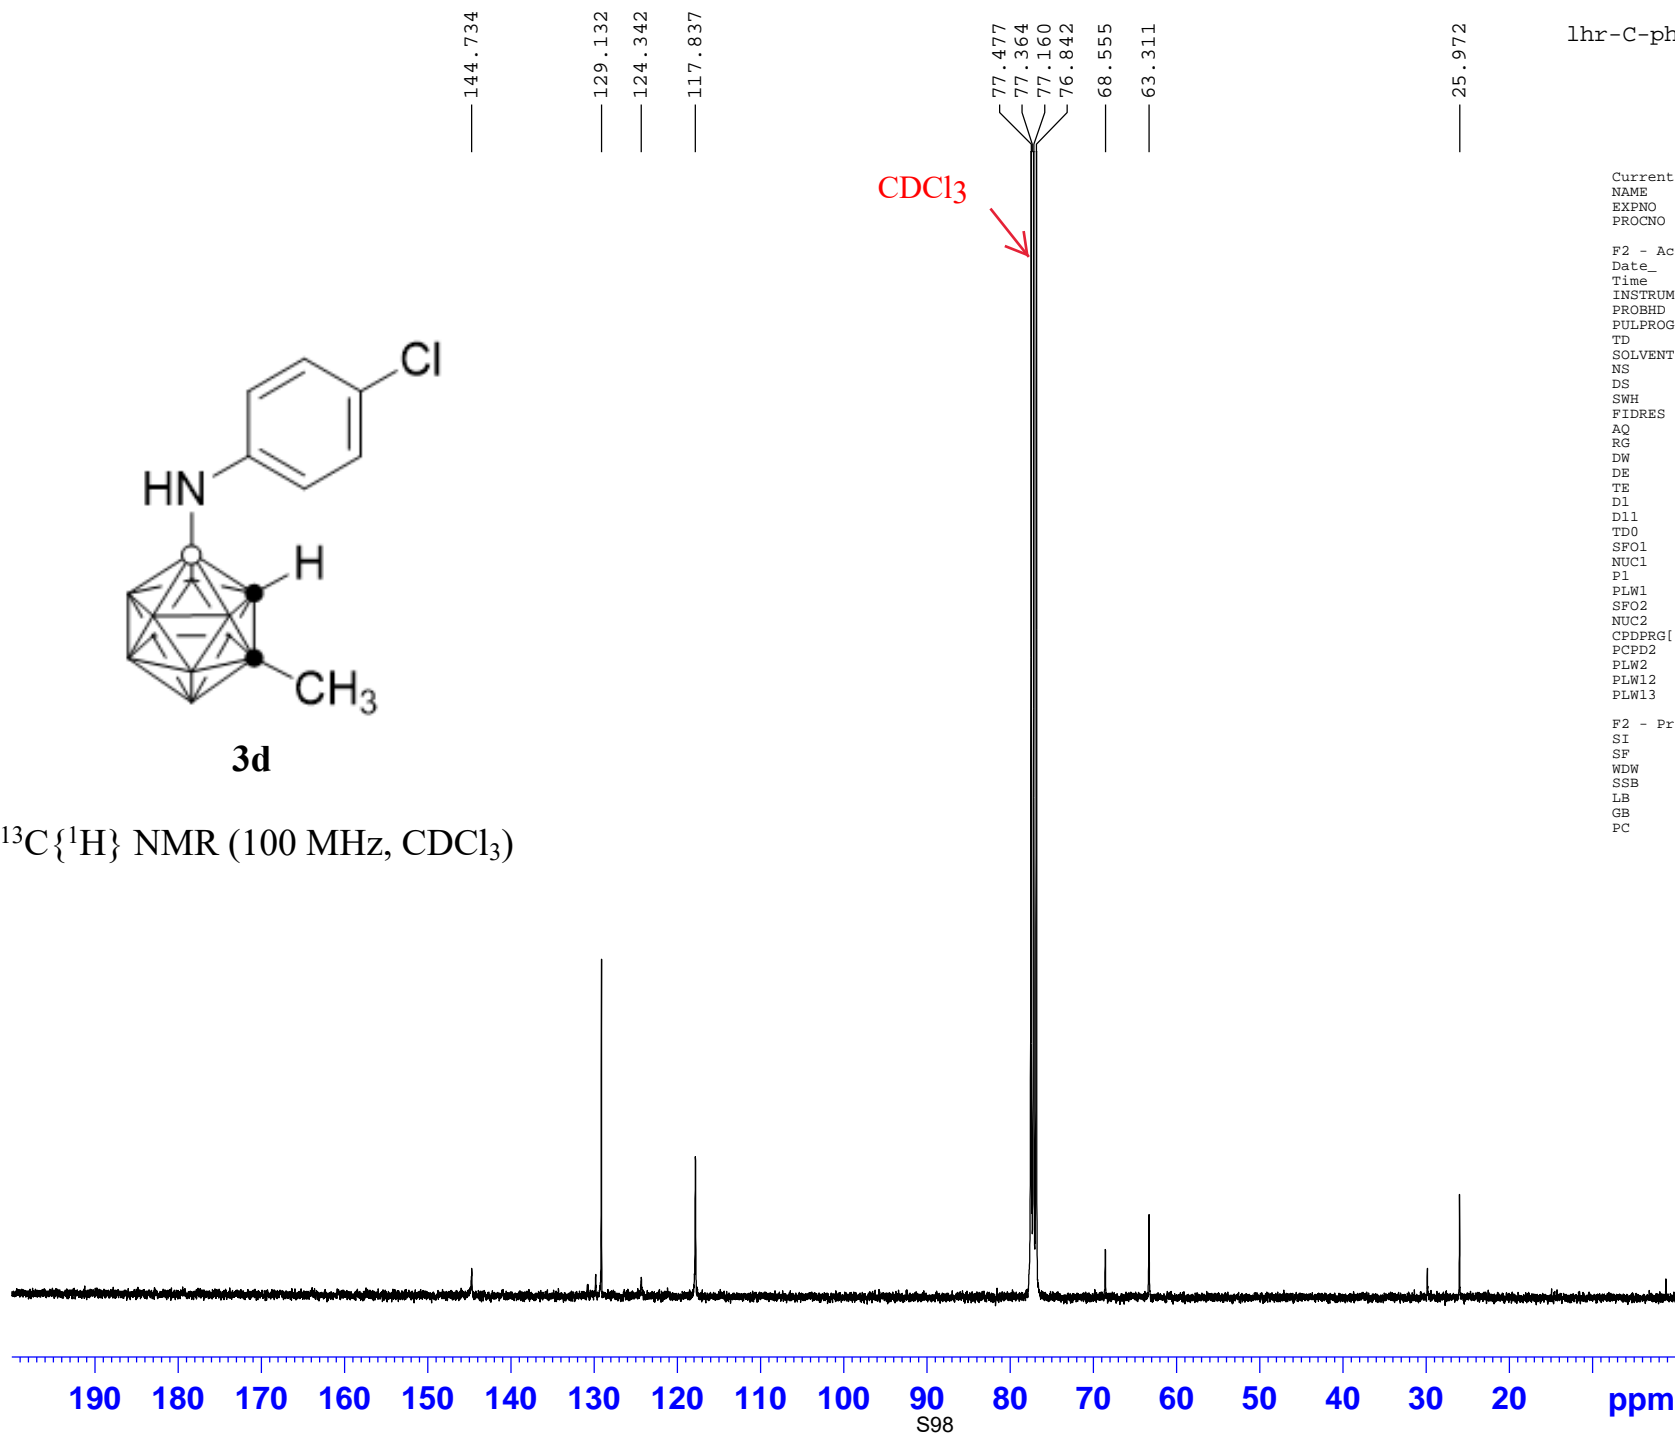

1hr-C-phnh2cl-0397-2- $\text{CDCl}_3$

Current Data Parameters  
 NAME 1hr-C-phnh2cl-0397-2- $\text{CDCl}_3$   
 EXPNO 3  
 PROCNO 1

F2 - Acquisition Parameters  
 Date\_ 20160626  
 Time 15.08 h  
 INSTRUM spect  
 PROBHD z824601\_0021 (f  
 PULPROG zgpg30  
 TD 65536  
 SOLVENT  $\text{CDCl}_3$   
 NS 5992  
 DS 4  
 SWH 24038.461 Hz  
 FIDRES 0.366798 Hz  
 AQ 1.3631488 sec  
 RG 203  
 DW 20.800 usec  
 DE 6.50 usec  
 TE 295.2 K  
 D1 2.0000000 sec  
 D11 0.0300000 sec  
 TD0 1  
 SFO1 100.6228298 MHz  
 NUC1  $^{13}\text{C}$   
 P1 9.50 usec  
 PLW1 41.2500000 W  
 SFO2 400.1316005 MHz  
 NUC2  $^1\text{H}$   
 CPDPRG2 waltz16  
 PCPD2 90.00 usec  
 PLW2 8.31000042 W  
 PLW12 0.23083000 W  
 PLW13 0.11611000 W

F2 - Processing parameters  
 SI 32768  
 SF 100.6127561 MHz  
 WDW EM  
 SSB 0  
 LB 1.00 Hz  
 GB 0  
 PC 1.40

1hr-B-0397-2-clphnh-CDC13

Current Data Parameters  
NAME 1hr-B-0397-2-clphnh-CDC13  
EXPNO 1  
PROCNO 1

F2 - Acquisition Parameters  
Date\_ 20160622  
Time 14.48 h  
INSTRUM spect  
PROBHD z108618\_0257 (  
PULPROG zgdc  
TD 65536  
SOLVENT CDC13  
NS 20  
DS 4  
SWH 24038.461 Hz  
FIDRES 0.366798 Hz  
AQ 1.3631488 sec  
RG 287  
DW 20.800 usec  
DE 6.50 usec  
TE 295.2 K  
D1 2.0000000 sec  
D11 0.0300000 sec  
TD0 1  
SFO1 128.4096890 MHz  
NUC1 11B  
P1 7.50 usec  
PLW1 55.09999847 W  
SFO2 400.2316009 MHz  
NUC2 1H  
CPDPRG[2] waltz16  
PCPD2 90.00 usec  
PLW2 13.56000042 W  
PLW12 0.27428001 W

F2 - Processing parameters  
SI 32768  
SF 128.4097615 MHz  
WDW EM  
SSB 0  
LB 1.00 Hz  
GB 0  
PC 1.40

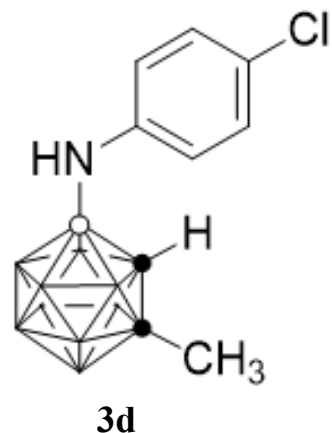

$^{11}\text{B}\{^1\text{H}\}$  NMR (128 MHz,  $\text{CDCl}_3$ )

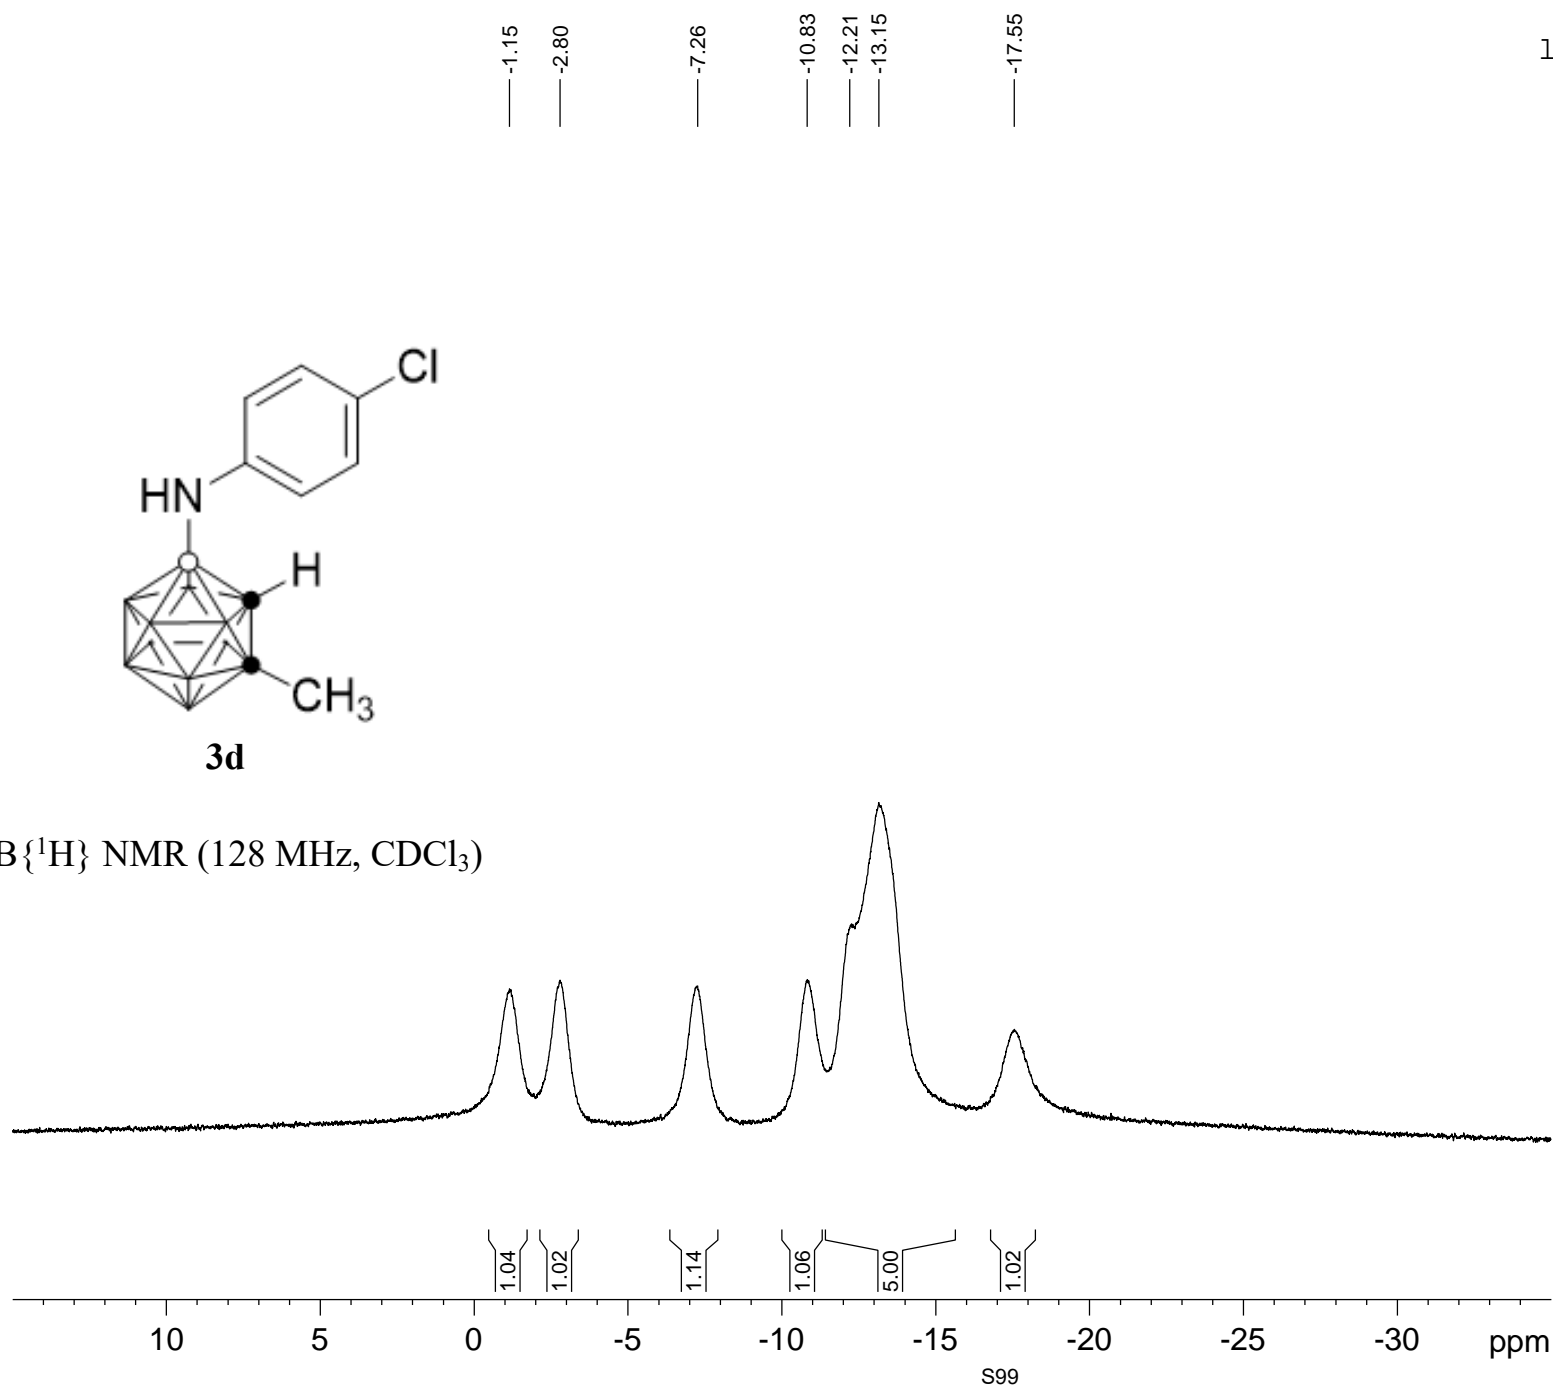

1hr-B-0397-2-clphnh-CDCl3(C)

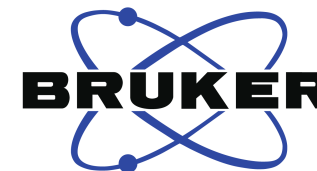

Current Data Parameters  
NAME 1hr-B-0397-2-clphnh-CDCl3(C)  
EXPNO 1  
PROCNO 1

F2 - Acquisition Parameters  
Date\_ 20160622  
Time 14.50 h  
INSTRUM spect  
PROBHD z108618\_0257 (  
PULPROG zg  
TD 65536  
SOLVENT CDCl3  
NS 20  
DS 2  
SWH 24038.461 Hz  
FIDRES 0.366798 Hz  
AQ 1.3631488 sec  
RG 406  
DW 20.800 usec  
DE 6.50 usec  
TE 294.7 K  
D1 2.00000000 sec  
TD0 1  
SFO1 128.4096890 MHz  
NUC1 11B  
P1 7.50 usec  
PLW1 55.09999847 W

F2 - Processing parameters  
SI 32768  
SF 128.4097430 MHz  
WDW EM  
SSB 0  
LB 1.00 Hz  
GB 0  
PC 1.40

-0.99  
-2.04  
-3.23  
-6.49  
-7.68  
-10.11  
-11.43  
-12.58  
-13.69  
-16.76  
-18.09

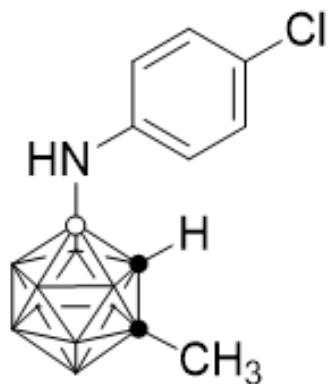

3d

$^{11}\text{B}$  NMR (128 MHz,  $\text{CDCl}_3$ )

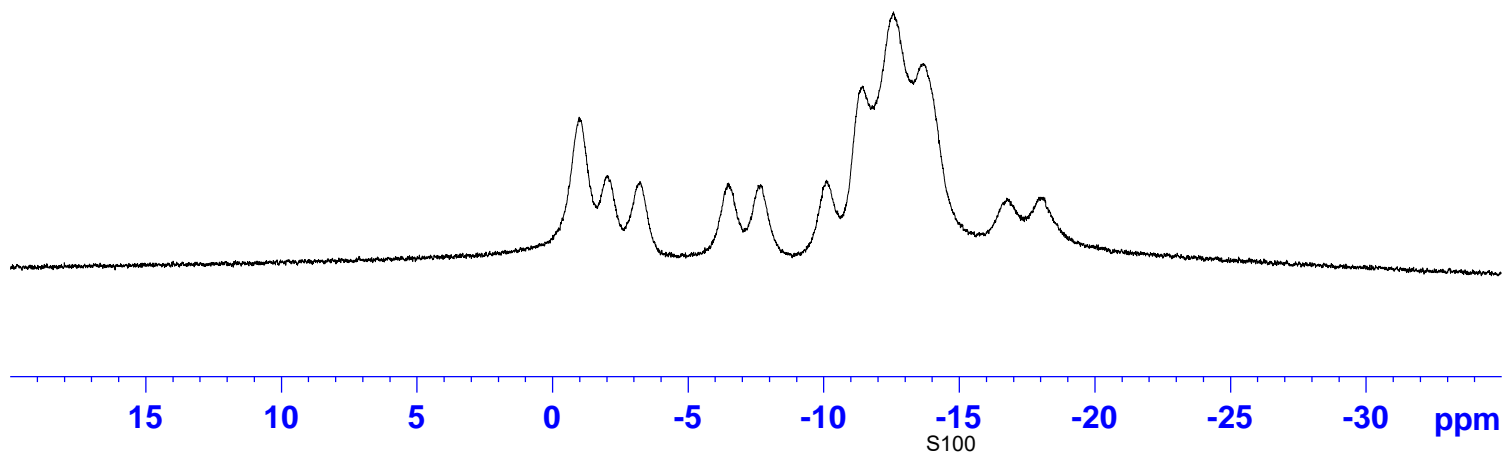



# Thermo QEFMS Analysis Report

## Analysis Info

|               |                                        |                |          |
|---------------|----------------------------------------|----------------|----------|
| Sample Name : | Lhr-397                                | Reference No.: | Qzwx059  |
| Instrument :  | Q Exactive Focus Orbitrap              |                |          |
| Source :      | HESI II                                | Polarity :     | Positive |
| Comment :     | ESI pos, 3.5kV, by LC, with sheath gas |                |          |

## Accurate Mass Measurement

|                                        |                                                    |
|----------------------------------------|----------------------------------------------------|
| Molecular formula :                    | C <sub>9</sub> H <sub>18</sub> B <sub>10</sub> ClN |
| Experimental Mass [M+H] <sup>+</sup> : | 284.22011                                          |
| Theoretical Mass [M+H] <sup>+</sup> :  | 284.22042                                          |
| Error (ppm) :                          | 1.0                                                |

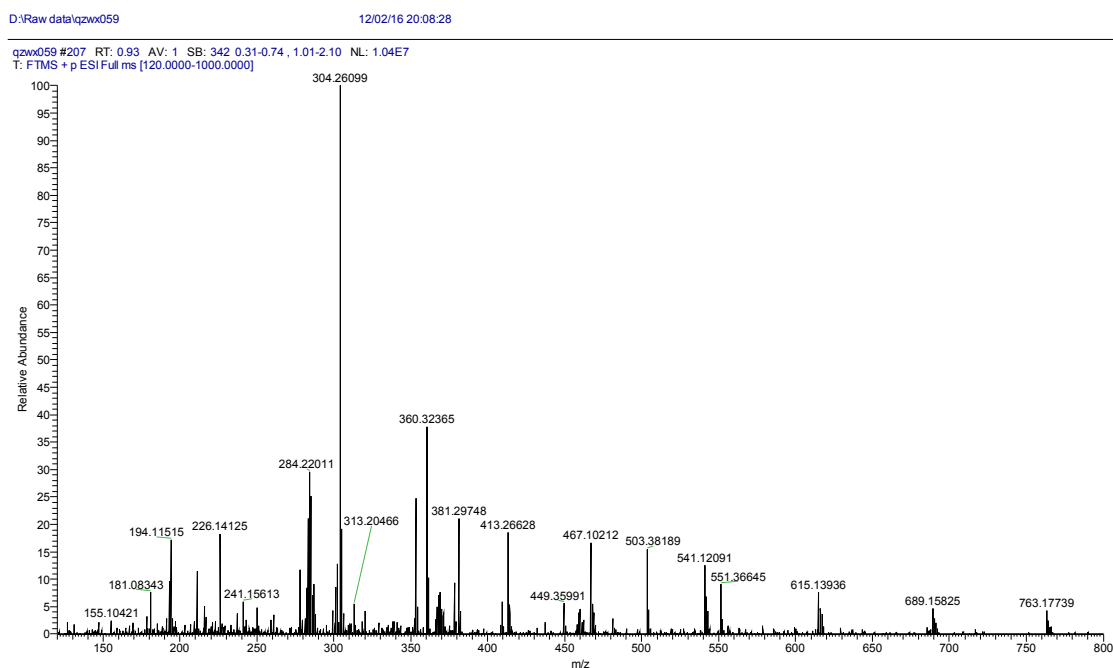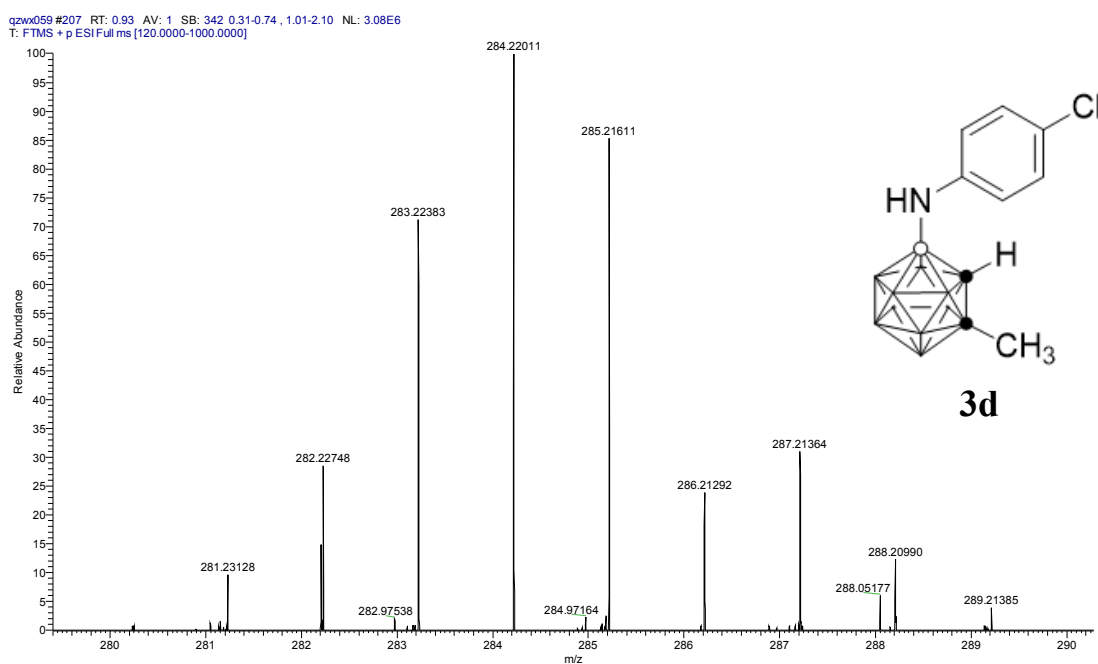

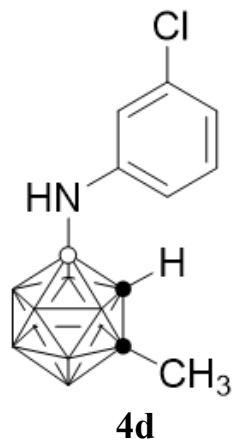

<sup>1</sup>H NMR (400 MHz, CDCl<sub>3</sub>)

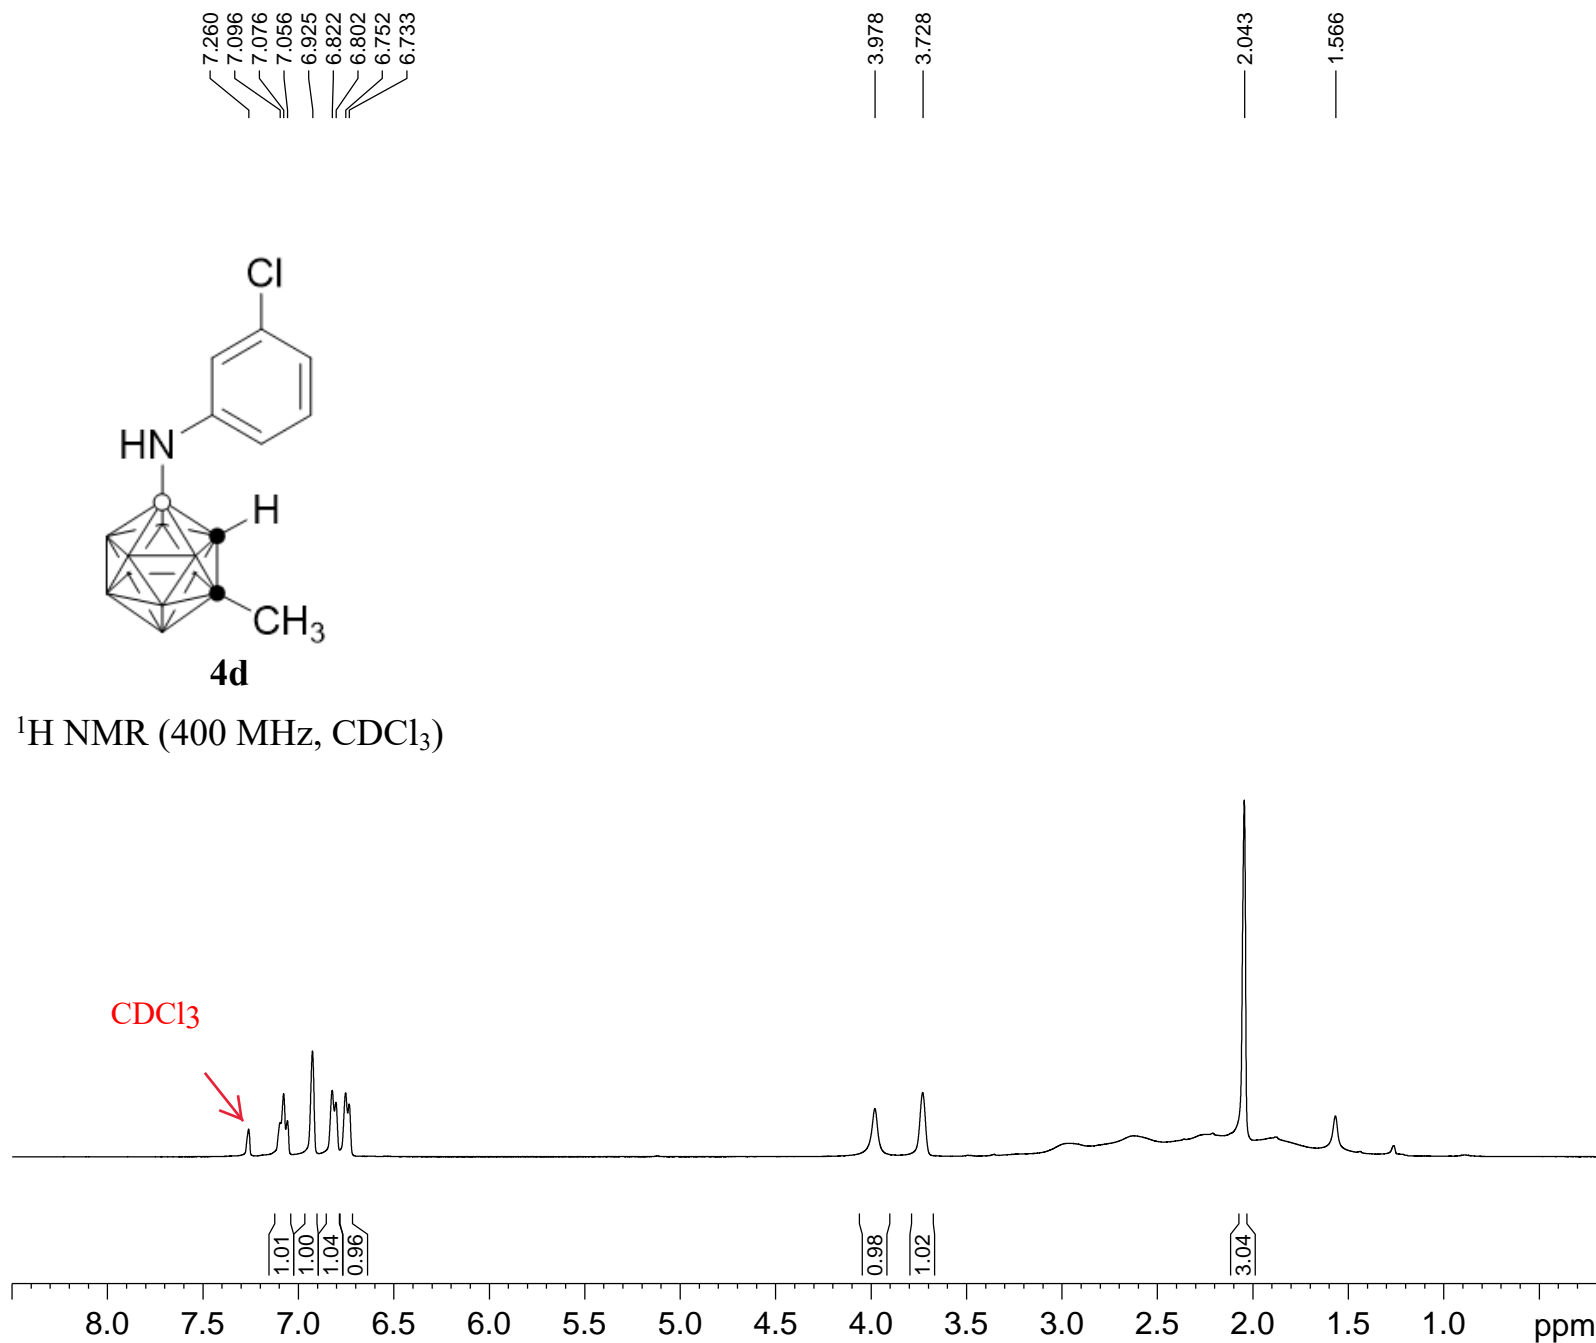

lhr-H-0547-pn3cl-CD

Current Data Parameters  
 NAME lhr-H-0547-pn3cl-CD  
 EXPNO 2  
 PROCNO 1

F2 - Acquisition Parameters  
 Date\_ 20161119  
 Time 9.58 h  
 INSTRUM spect  
 PROBHD Z108618\_0257 (zg30)  
 PULPROG zg30  
 TD 65536  
 SOLVENT CDCl3  
 NS 11  
 DS 2  
 SWH 8012.820 Hz  
 FIDRES 0.122266 Hz  
 AQ 4.0894465 sec  
 RG 64  
 DW 62.400 usec  
 DE 6.50 usec  
 TE 296.0 K  
 D1 1.0000000 sec  
 TD0 1  
 SFO1 400.2324714 MHz  
 NUC1 1H  
 P1 12.80 usec  
 PLW1 13.56000042 W

F2 - Processing parameters  
 SI 65536  
 SF 400.2300092 MHz  
 WDW EM  
 SSB 0  
 LB 0.30 Hz  
 GB 0  
 PC 1.00

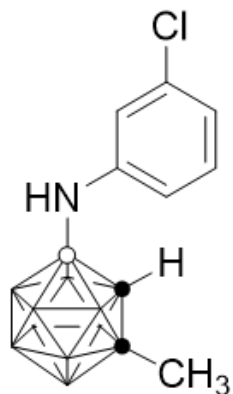

4d

<sup>13</sup>C{<sup>1</sup>H} NMR (100 MHz, CDCl<sub>3</sub>)

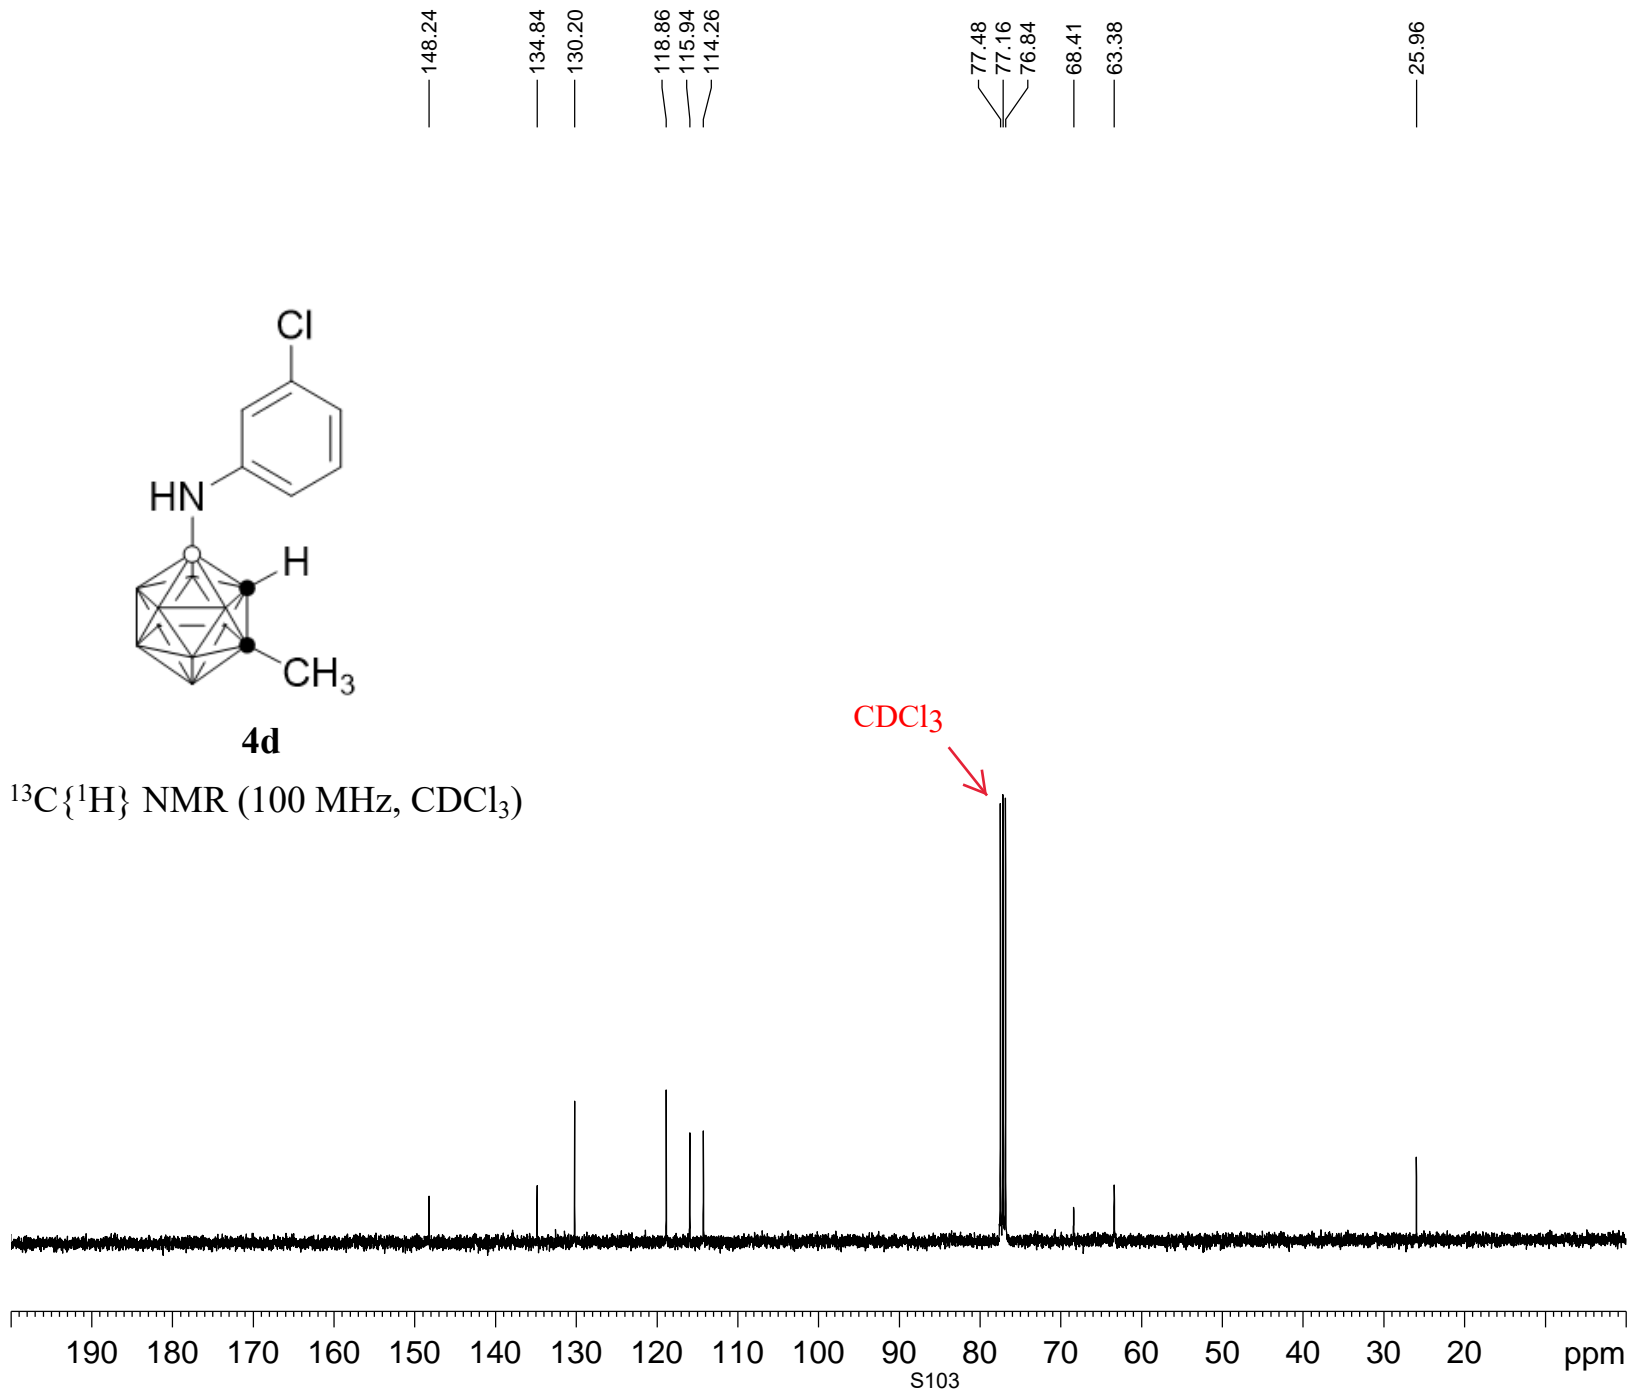

1hr-C-0547-pn3cl-CDCl<sub>3</sub>

Current Data Parameters  
 NAME 1hr-C-0547-pn3cl-CDCl<sub>3</sub>  
 EXPNO 1  
 PROCNO 1

F2 - Acquisition Parameters  
 Date\_ 20161119  
 Time 10.04 h  
 INSTRUM spect  
 PROBHD z108618\_0257 ( )  
 PULPROG zgpg30  
 TD 65536  
 SOLVENT CDCl<sub>3</sub>  
 NS 92  
 DS 4  
 SWH 29761.904 Hz  
 FIDRES 0.454131 Hz  
 AQ 1.1010048 sec  
 RG 203  
 DW 16.800 usec  
 DE 6.50 usec  
 TE 296.2 K  
 D1 2.00000000 sec  
 D11 0.03000000 sec  
 TD0 1  
 SFO1 100.6479773 MHz  
 NUC1 13C  
 P1 9.50 usec  
 PLW1 55.34000015 W  
 SFO2 400.2316009 MHz  
 NUC2 1H  
 CPDPRG[2] waltz16  
 PCPD2 90.00 usec  
 PLW2 13.56000042 W  
 PLW12 0.27428001 W  
 PLW13 0.13796000 W

F2 - Processing parameters  
 SI 32768  
 SF 100.6379020 MHz  
 WDW EM  
 SSB 0  
 LB 1.00 Hz  
 GB 0  
 PC 1.40

1hr-B-0547-pn3cl-CDCl3

Current Data Parameters  
NAME 1hr-B-0547-pn3cl-CDCl3  
EXPNO 1  
PROCNO 1

F2 - Acquisition Parameters  
Date\_ 20161118  
Time 20.26 h  
INSTRUM spect  
PROBHD z108618\_0257 (  
PULPROG zgdc  
TD 65536  
SOLVENT CDCl3  
NS 12  
DS 4  
SWH 24038.461 Hz  
FIDRES 0.366798 Hz  
AQ 1.3631488 sec  
RG 287  
DW 20.800 usec  
DE 6.50 usec  
TE 295.6 K  
D1 2.0000000 sec  
D11 0.0300000 sec  
TD0 1  
SFO1 128.4096890 MHz  
NUC1 11B  
P1 7.50 usec  
PLW1 55.09999847 W  
SFO2 400.2316009 MHz  
NUC2 1H  
CPDPRG[2] waltz16  
PCPD2 90.00 usec  
PLW2 13.56000042 W  
PLW12 0.27428001 W

F2 - Processing parameters  
SI 32768  
SF 128.4097615 MHz  
WDW EM  
SSB 0  
LB 1.00 Hz  
GB 0  
PC 1.40

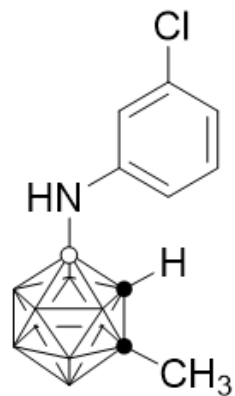

4d

$^{11}\text{B}\{^1\text{H}\}$  NMR (128 MHz,  $\text{CDCl}_3$ )

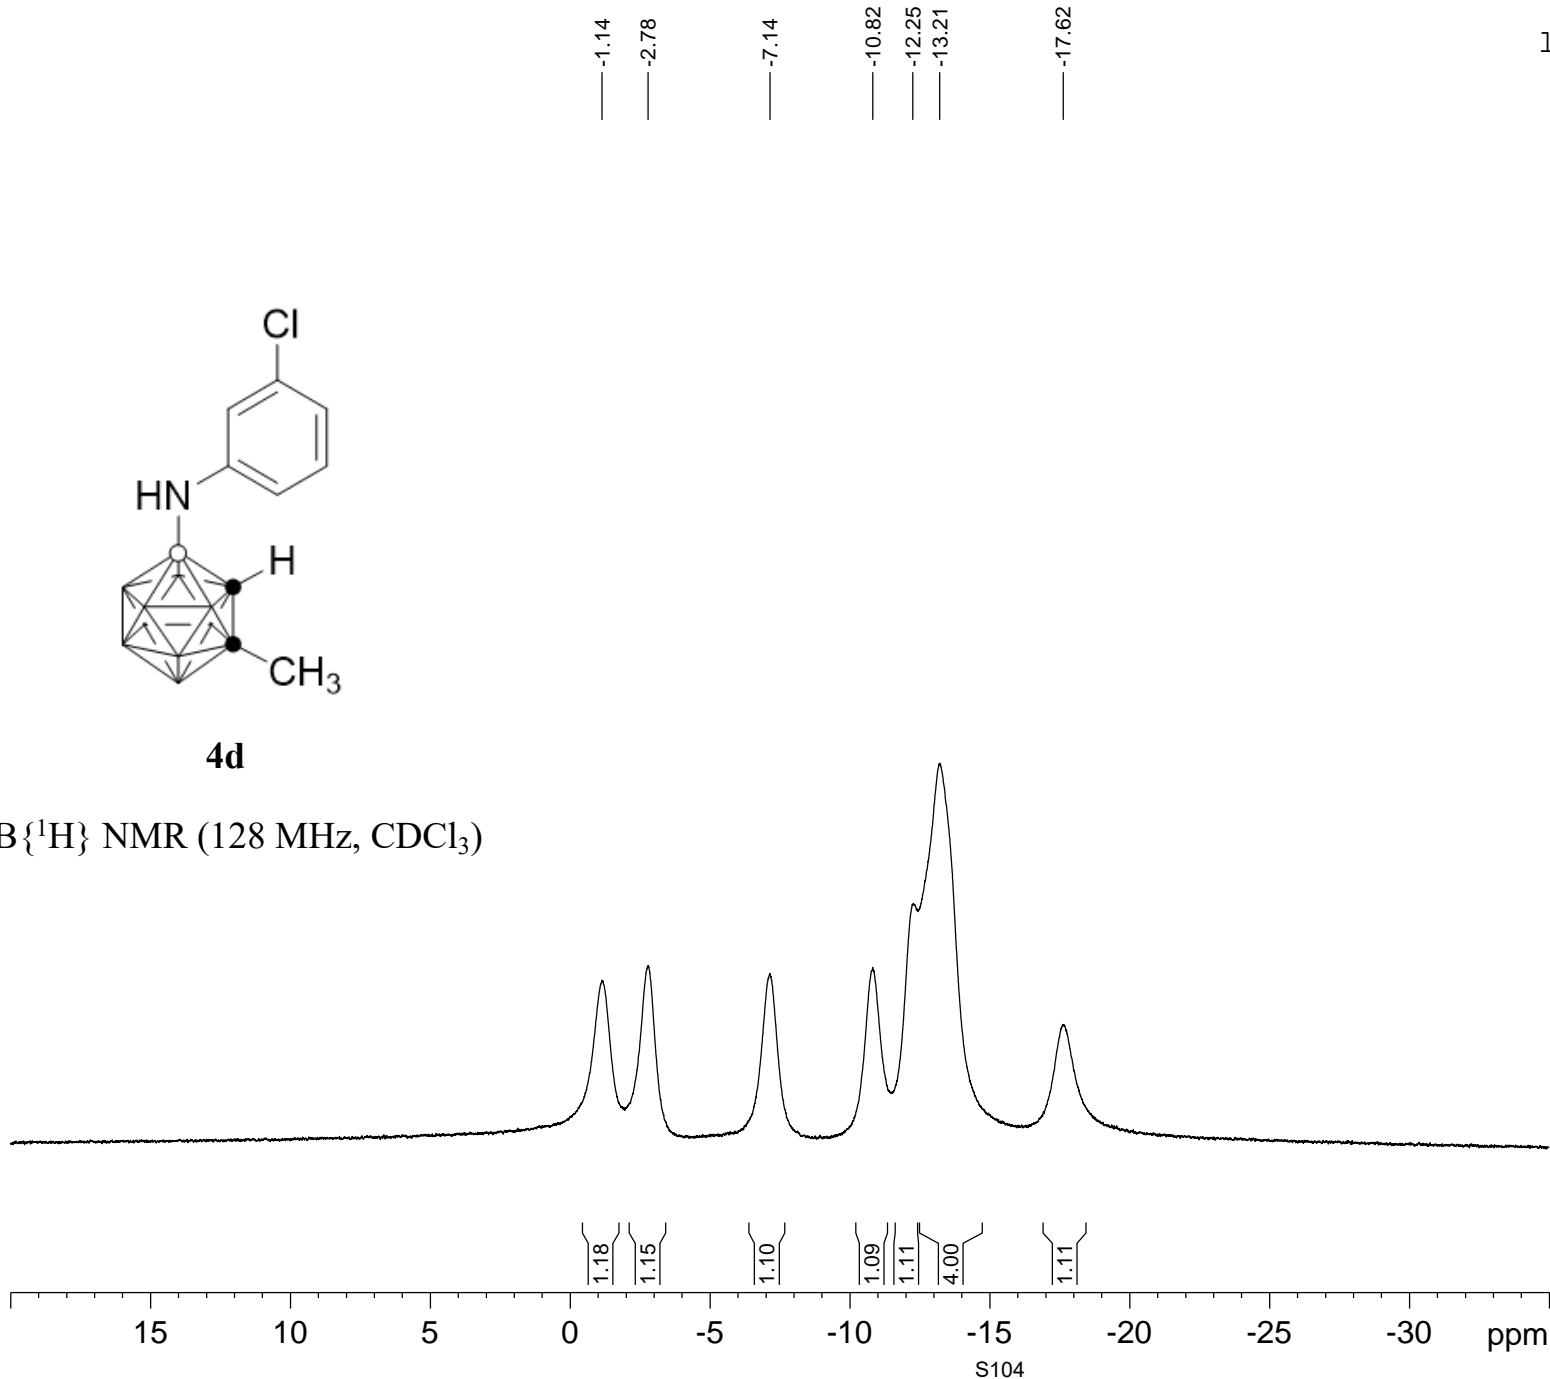

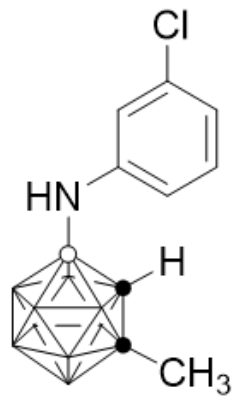

**4d**

<sup>11</sup>B NMR (128 MHz, CDCl<sub>3</sub>)

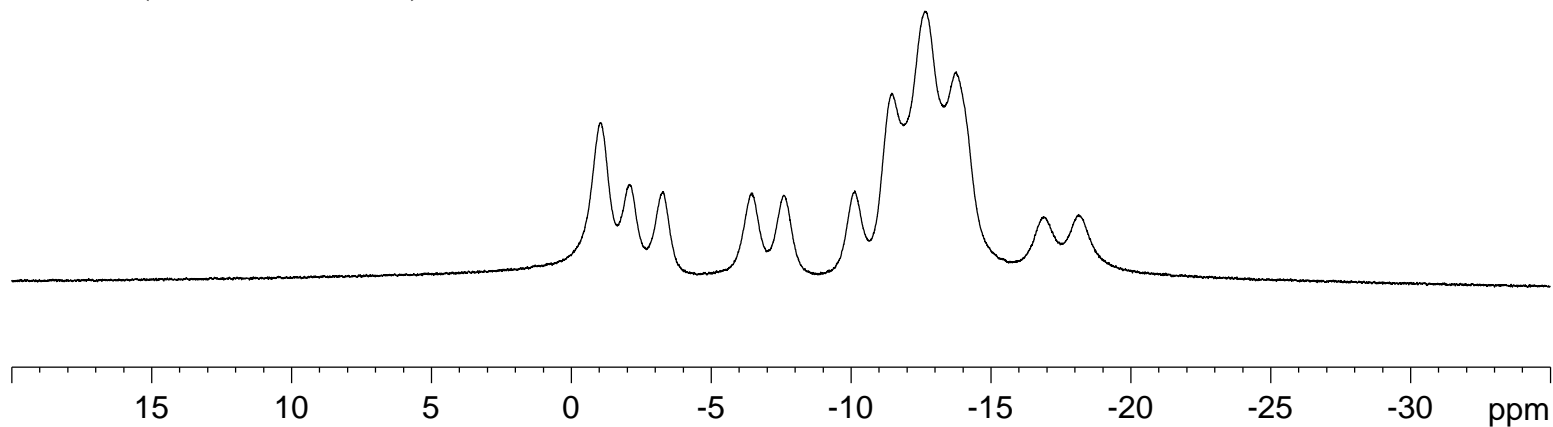

| -1.04  
 | -2.09  
 | -3.29  
  
 | -6.44  
 | -7.60  
  
 | -10.14  
 | -11.46  
 | -12.64  
 | -13.76  
  
 | -16.88  
 | -18.13

1hr-B-0547-pn3cl-CDCl<sub>3</sub>(C)

Current Data Parameters  
 NAME 1hr-B-0547-pn3cl-CDCl<sub>3</sub>(C)  
 EXPNO 1  
 PROCNO 1

F2 - Acquisition Parameters  
 Date\_ 20161118  
 Time 20.28 h  
 INSTRUM spect  
 PROBHD z108618\_0257 (  
 PULPROG zg  
 TD 65536  
 SOLVENT CDCl<sub>3</sub>  
 NS 18  
 DS 2  
 SWH 24038.461 Hz  
 FIDRES 0.366798 Hz  
 AQ 1.3631488 sec  
 RG 203  
 DW 20.800 usec  
 DE 6.50 usec  
 TE 295.4 K  
 D1 2.00000000 sec  
 TD0 1  
 SFO1 128.4096890 MHz  
 NUC1 11B  
 P1 7.50 usec  
 PLW1 55.09999847 W

F2 - Processing parameters  
 SI 32768  
 SF 128.4097504 MHz  
 WDW EM  
 SSB 0  
 LB 1.00 Hz  
 GB 0  
 PC 1.40

# Thermo QEFMS Analysis Report

## Analysis Info

|               |                                        |                |          |
|---------------|----------------------------------------|----------------|----------|
| Sample Name : | Lhr-547                                | Reference No.: | Qzwx061  |
| Instrument :  | Q Exactive Focus Orbitrap              |                |          |
| Source :      | HESI II                                | Polarity :     | Positive |
| Comment :     | ESI pos, 3.5kV, by LC, with sheath gas |                |          |

## Accurate Mass Measurement

|                                        |                                                    |
|----------------------------------------|----------------------------------------------------|
| Molecular formula :                    | C <sub>9</sub> H <sub>18</sub> B <sub>10</sub> ClN |
| Experimental Mass [M+H] <sup>+</sup> : | 284.22025                                          |
| Theoretical Mass [M+H] <sup>+</sup> :  | 284.22042                                          |
| Error (ppm) :                          | 0.5                                                |

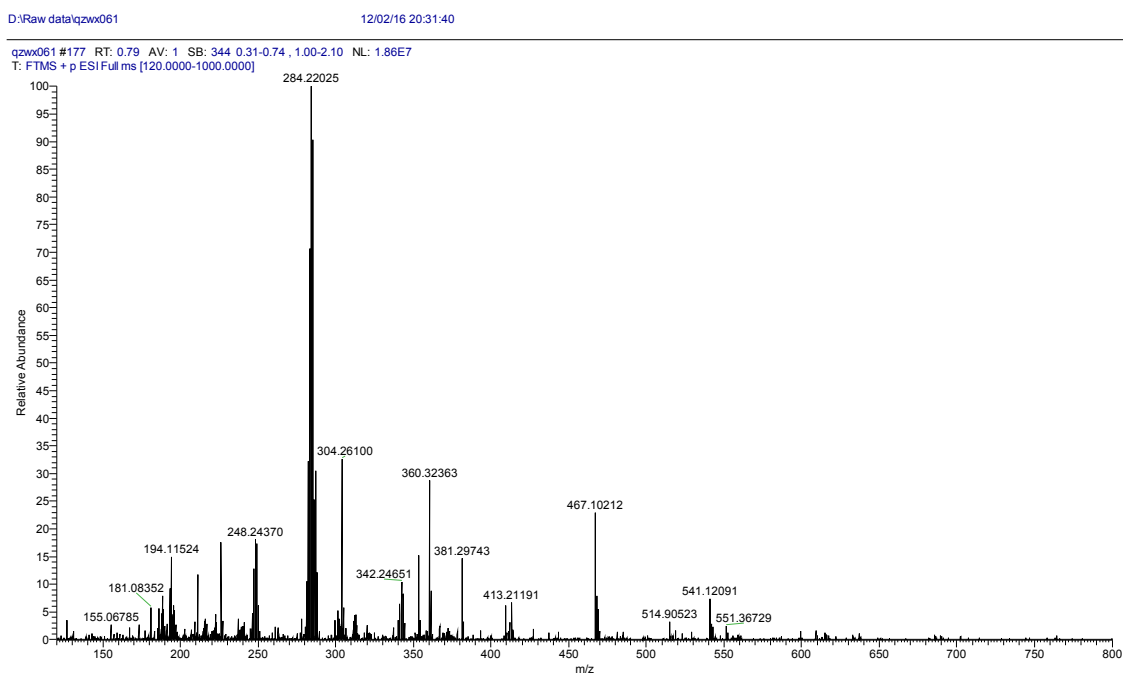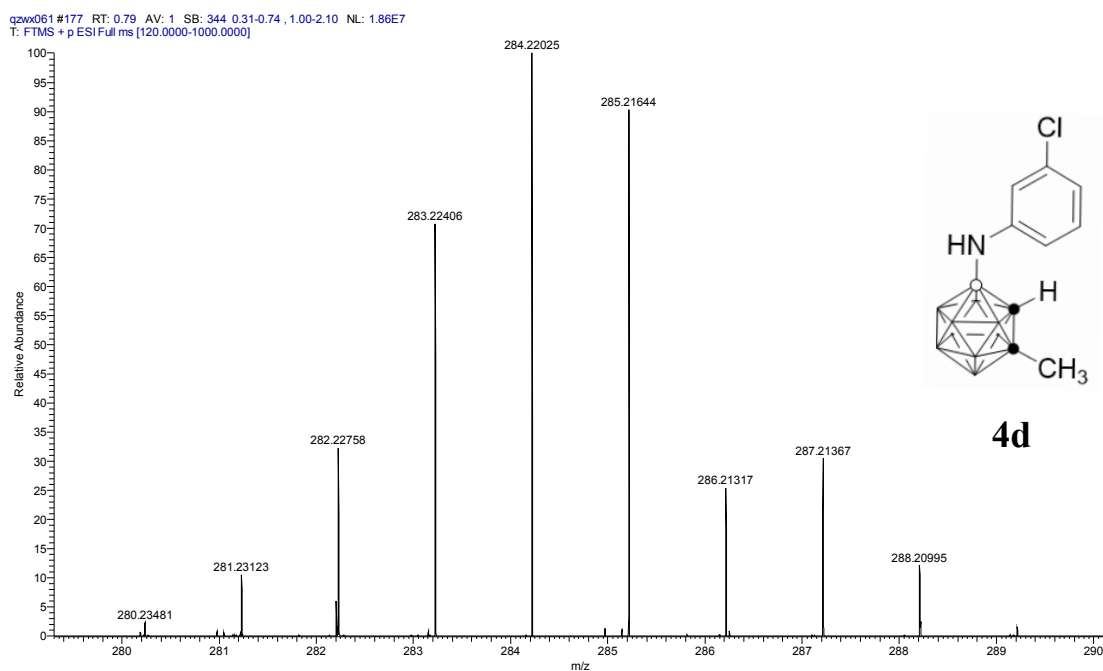

1hr-H-0530-phnh-oCl-CDCl3

Bruker Advance III 400

Current Data Parameters  
NAME 1hr-H-0530-phnh-oCl-CDCl3  
EXPNO 1  
PROCNO 1

F2 - Acquisition Parameters  
Date\_ 20161105  
Time 12.44 h  
INSTRUM spect  
PROBHD Z824601\_0021 (  
PULPROG zg30  
TD 65536  
SOLVENT CDCl3  
NS 8  
DS 2  
SWH 8012.820 Hz  
FIDRES 0.122266 Hz  
AQ 4.0894465 sec  
RG 161  
DW 62.400 usec  
DE 6.50 usec  
TE 294.5 K  
D1 1.0000000 sec  
TD0 1  
SF01 400.1324708 MHz  
NUC1 1H  
P1 15.00 usec  
PLW1 8.31000042 W

F2 - Processing parameters  
SI 65536  
SF 400.1300097 MHz  
WDW EM  
SSB 0  
LB 0.30 Hz  
GB 0  
PC 1.00

7.444  
7.441  
7.424  
7.421  
7.273  
7.269  
7.260  
7.253  
7.249  
7.153  
7.149  
7.131  
7.114  
7.110  
6.731  
6.728  
6.712  
6.710  
6.693  
6.690

4.628

3.773

2.046

1.565

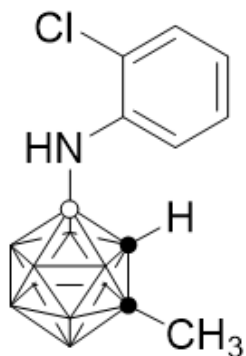

5d

$^1\text{H}$  NMR (400 MHz,  $\text{CDCl}_3$ )

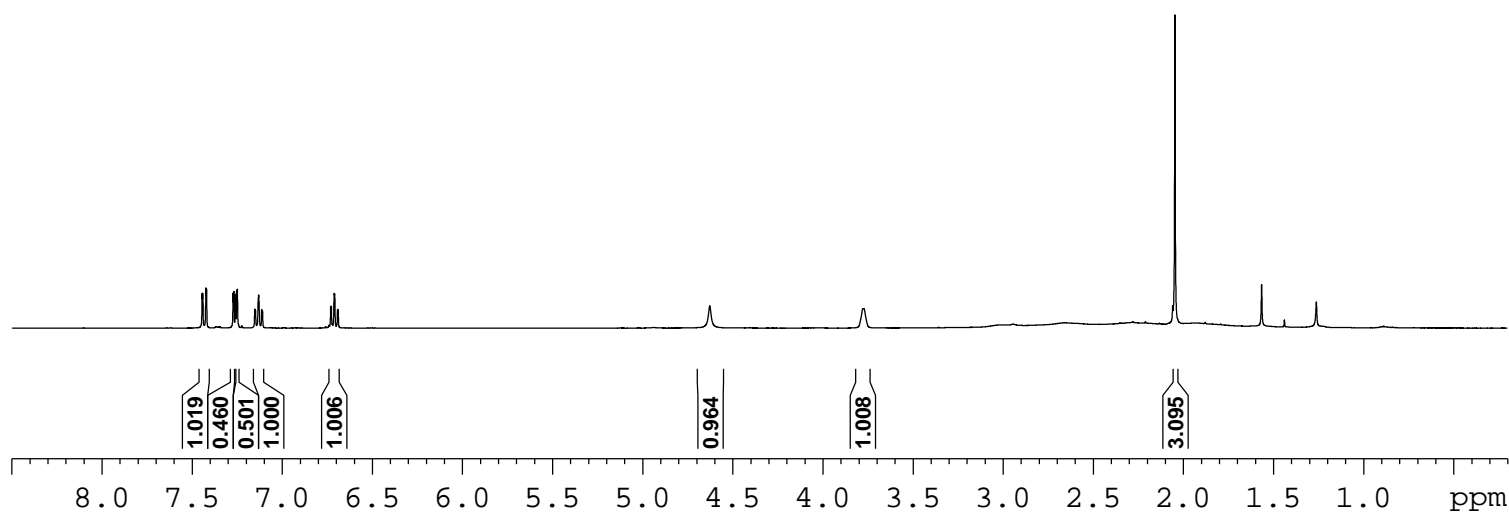

lhr-C-0530-phnh-oCl-CDCl3

Bruker Advance III 400

Current Data Parameters  
NAME lhr-C-0530-phnh-oCl-CDCl3  
EXPNO 1  
PROCNO 1

F2 - Acquisition Parameters  
Date\_ 20161105  
Time 12.55 h  
INSTRUM spect  
PROBHD Z824601\_0021 (  
PULPROG zgpg30  
TD 65536  
SOLVENT CDCl3  
NS 166  
DS 4  
SWH 24038.461 Hz  
FIDRES 0.366798 Hz  
AQ 1.3631488 sec  
RG 203  
DW 20.800 usec  
DE 6.50 usec  
TE 294.9 K  
D1 2.00000000 sec  
D11 0.03000000 sec  
TD0 1  
SFO1 100.6228298 MHz  
NUC1 13C  
P1 9.50 usec  
PLW1 41.25000000 W  
SFO2 400.1316005 MHz  
NUC2 1H  
CPDPRG[2] waltz16  
PCPD2 90.00 usec  
PLW2 8.31000042 W  
PLW12 0.23083000 W  
PLW13 0.11611000 W

F2 - Processing parameters  
SI 32768  
SF 100.6127576 MHz  
WDW EM  
SSB 0  
LB 1.00 Hz  
GB 0  
PC 1.40

143.319  
129.280  
127.597  
121.134  
119.171  
115.371  
77.478  
77.160  
76.843  
68.373  
63.716  
25.951

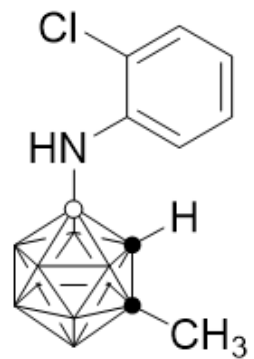

5d

<sup>13</sup>C {<sup>1</sup>H} NMR (100 MHz, CDCl<sub>3</sub>)

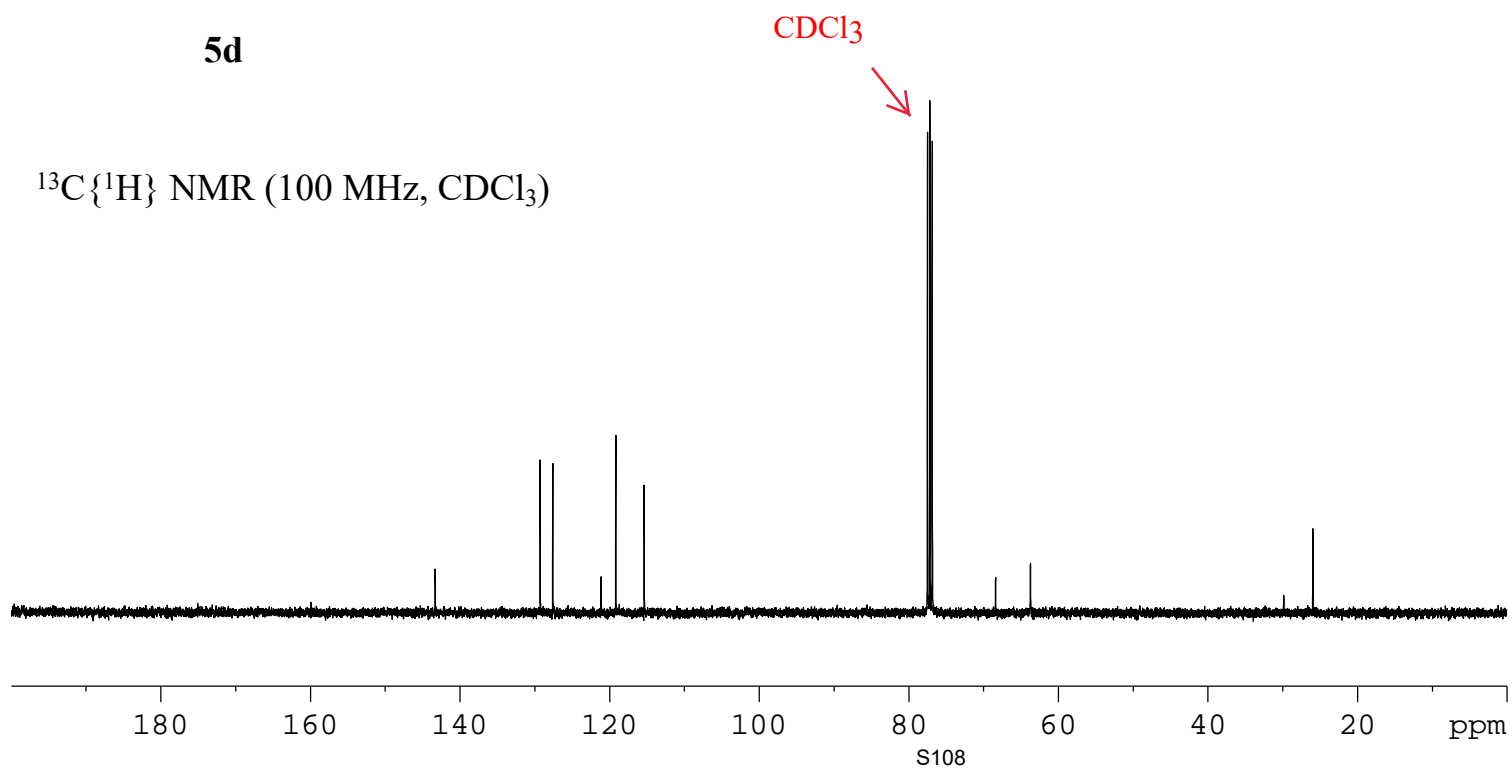

S108



1hr-B-0530-phnh-oCl-CDCl3

Current Data Parameters  
NAME 1hr-B-0530-phnh-oCl-CDCl3  
EXPNO 1  
PROCNO 1

F2 - Acquisition Parameters  
Date\_ 20161105  
Time 13.34 h  
INSTRUM spect  
PROBHD z108618\_0257 (  
PULPROG zgdc  
TD 65536  
SOLVENT CDCl3  
NS 12  
DS 4  
SWH 24038.461 Hz  
FIDRES 0.366798 Hz  
AQ 1.3631488 sec  
RG 203  
DW 20.800 usec  
DE 6.50 usec  
TE 296.2 K  
D1 2.0000000 sec  
D11 0.0300000 sec  
TD0 1  
SFO1 128.4096890 MHz  
NUC1 11B  
P1 7.50 usec  
PLW1 55.09999847 W  
SFO2 400.2316009 MHz  
NUC2 1H  
CPDPRG[2] waltz16  
PCPD2 90.00 usec  
PLW2 13.56000042 W  
PLW12 0.27428001 W

F2 - Processing parameters  
SI 32768  
SF 128.4097615 MHz  
WDW EM  
SSB 0  
LB 1.00 Hz  
GB 0  
PC 1.40

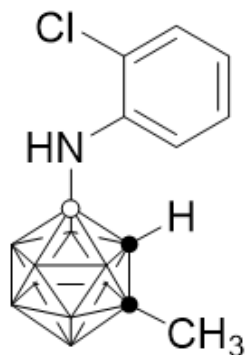

5d

— -0.66  
— -2.40  
— -6.82  
— -10.28  
— -11.77  
— -12.78  
— -17.12

$^{11}\text{B}\{^1\text{H}\}$  NMR (128 MHz,  $\text{CDCl}_3$ )

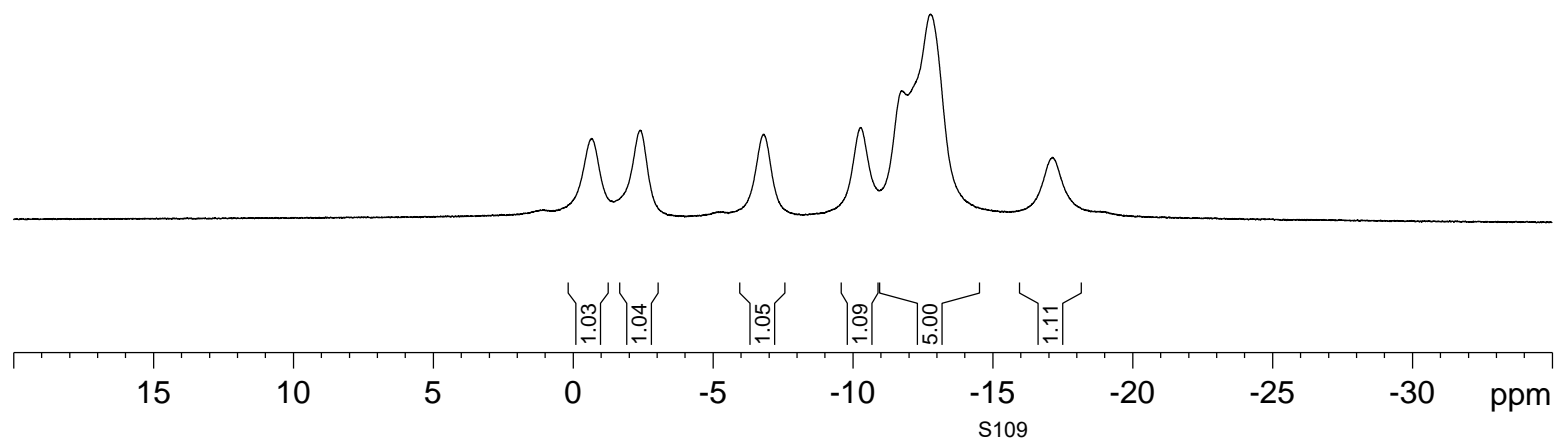

S109

lhr-B-0530-phnh-oCl-CDCl3(C)

Current Data Parameters  
NAME lhr-B-0530-phnh-oCl-CDCl3(C)  
EXPNO 1  
PROCNO 1

F2 - Acquisition Parameters  
Date\_ 20161105  
Time 13.36 h  
INSTRUM spect  
PROBHD Z108618\_0257 ( )  
PULPROG zg  
TD 65536  
SOLVENT CDCl3  
NS 18  
DS 2  
SWH 24038.461 Hz  
FIDRES 0.366798 Hz  
AQ 1.3631488 sec  
RG 203  
DW 20.800 usec  
DE 6.50 usec  
TE 296.2 K  
D1 2.00000000 sec  
TD0 1  
SFO1 128.4096890 MHz  
NUC1 11B  
P1 7.50 usec  
PLW1 55.09999847 W

F2 - Processing parameters  
SI 32768  
SF 128.4097504 MHz  
WDW EM  
SSB 0  
LB 1.00 Hz  
GB 0  
PC 1.40

— -0.56  
— -1.74  
— -2.87  
  
— -6.13  
— -7.28  
  
— -9.61  
— -10.96  
— -12.15  
— -13.32  
  
— -16.39  
— -17.65

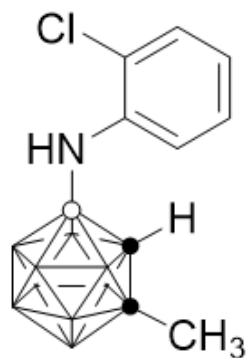

5d

$^{11}\text{B}$  NMR (128 MHz,  $\text{CDCl}_3$ )

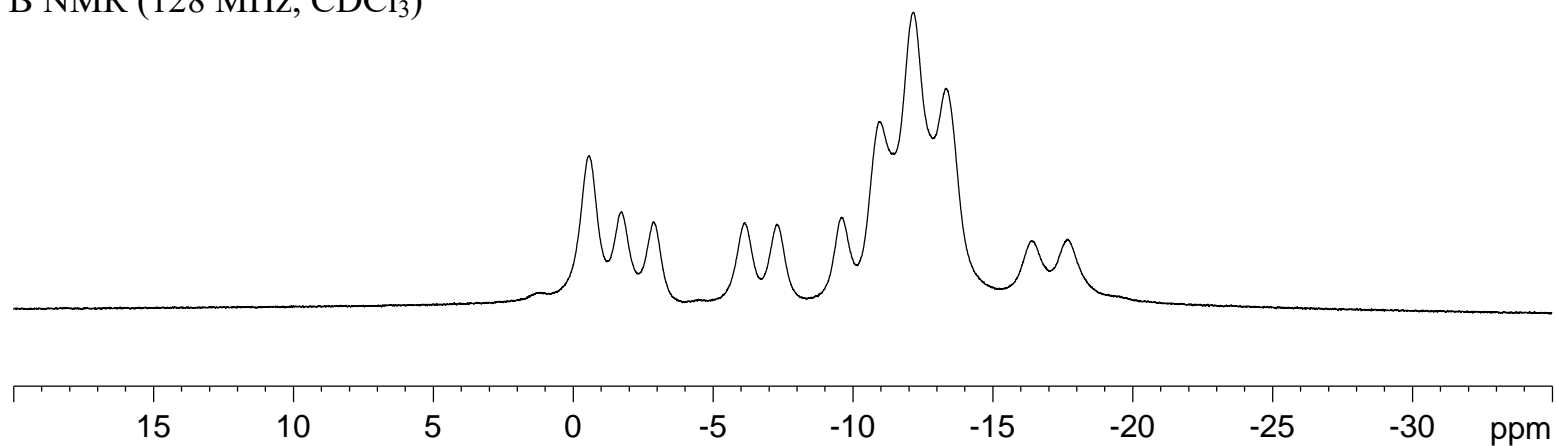

# Thermo QEFMS Analysis Report

## Analysis Info

|               |                                        |                |          |
|---------------|----------------------------------------|----------------|----------|
| Sample Name : | Lhr-530                                | Reference No.: | Qzwx060  |
| Instrument :  | Q Exactive Focus Orbitrap              |                |          |
| Source :      | HESI II                                | Polarity :     | Positive |
| Comment :     | ESI pos, 3.5kV, by LC, with sheath gas |                |          |

## Accurate Mass Measurement

|                                        |                                                    |
|----------------------------------------|----------------------------------------------------|
| Molecular formula :                    | C <sub>9</sub> H <sub>18</sub> B <sub>10</sub> ClN |
| Experimental Mass [M+H] <sup>+</sup> : | 284.22001                                          |
| Theoretical Mass [M+H] <sup>+</sup> :  | 284.22042                                          |
| Error (ppm) :                          | 1.4                                                |

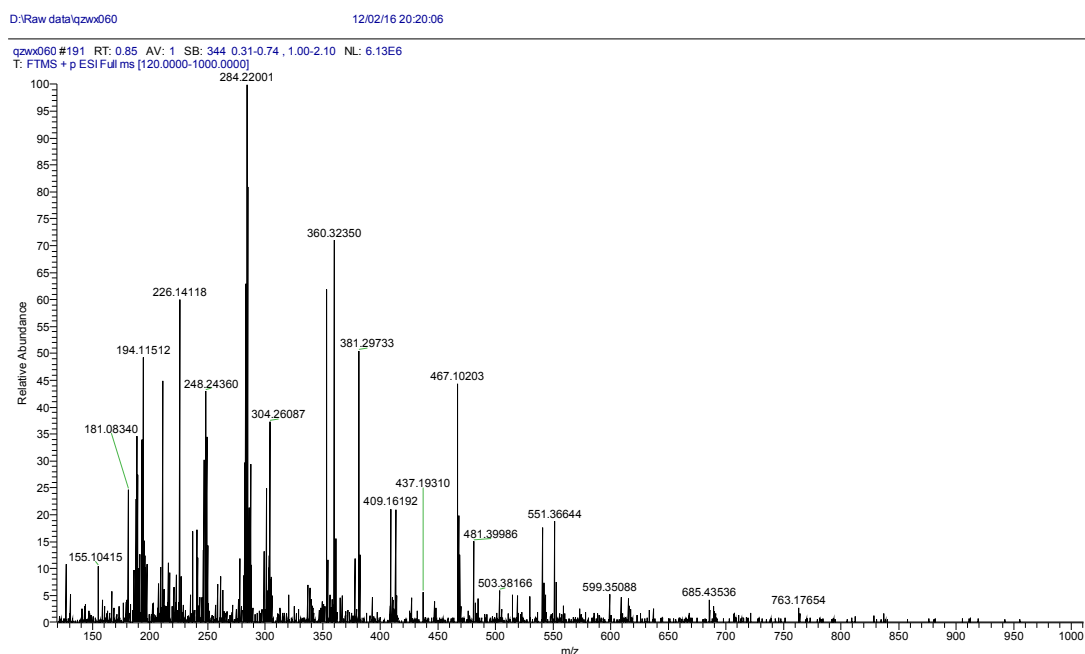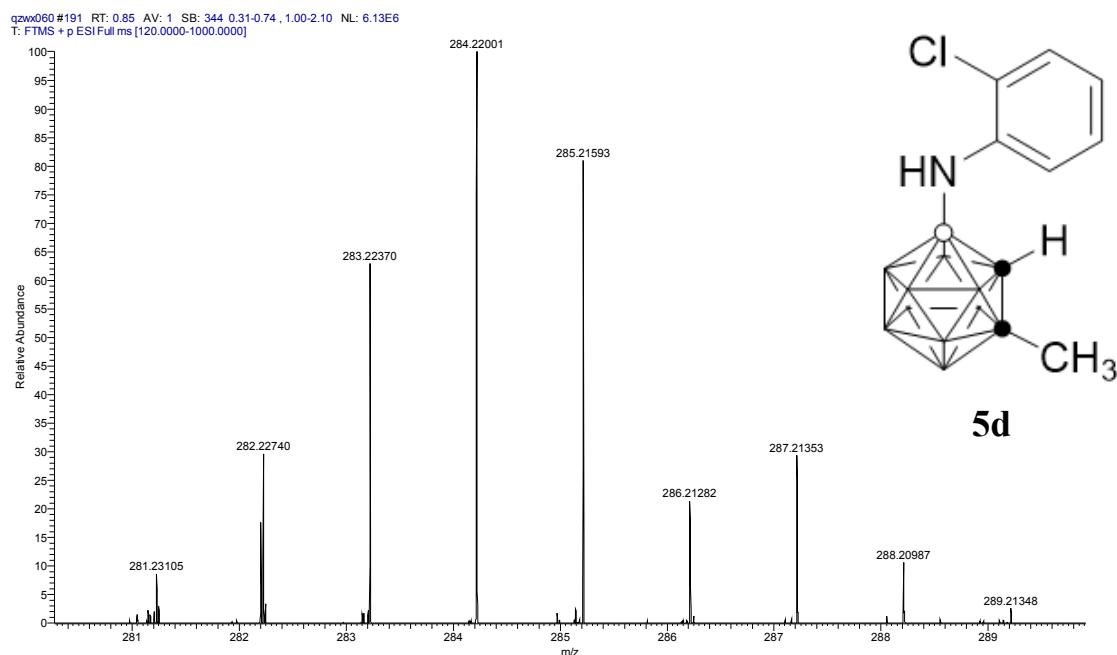

lhr-H-0529-phnhBr-CD

Current Data Parameters  
NAME lhr-H-0529-phnhBr-CD  
EXPNO 1  
PROCNO 1

F2 - Acquisition Parameters  
Date\_ 20161107  
Time 15.57 h  
INSTRUM spect  
PROBHD Z108618\_0257 ( )  
PULPROG zg30  
TD 65536  
SOLVENT CDCl3  
NS 8  
DS 2  
SWH 8012.820 Hz  
FIDRES 0.122266 Hz  
AQ 4.0894465 sec  
RG 71.8  
DW 62.400 usec  
DE 6.50 usec  
TE 296.0 K  
D1 1.00000000 sec  
TD0 1  
SFO1 400.2324714 MHz  
NUC1 1H  
P1 12.80 usec  
PLW1 13.56000042 W

F2 - Processing parameters  
SI 65536  
SF 400.2300099 MHz  
WDW EM  
SSB 0  
LB 0.30 Hz  
GB 0  
PC 1.00

7.260  
7.255  
7.233  
6.829  
6.807

3.938  
3.727

2.038

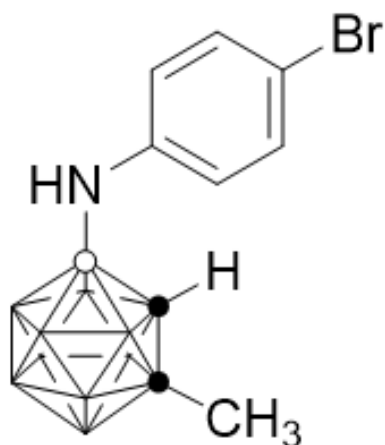

6d

<sup>1</sup>H NMR (400 MHz, CDCl<sub>3</sub>)

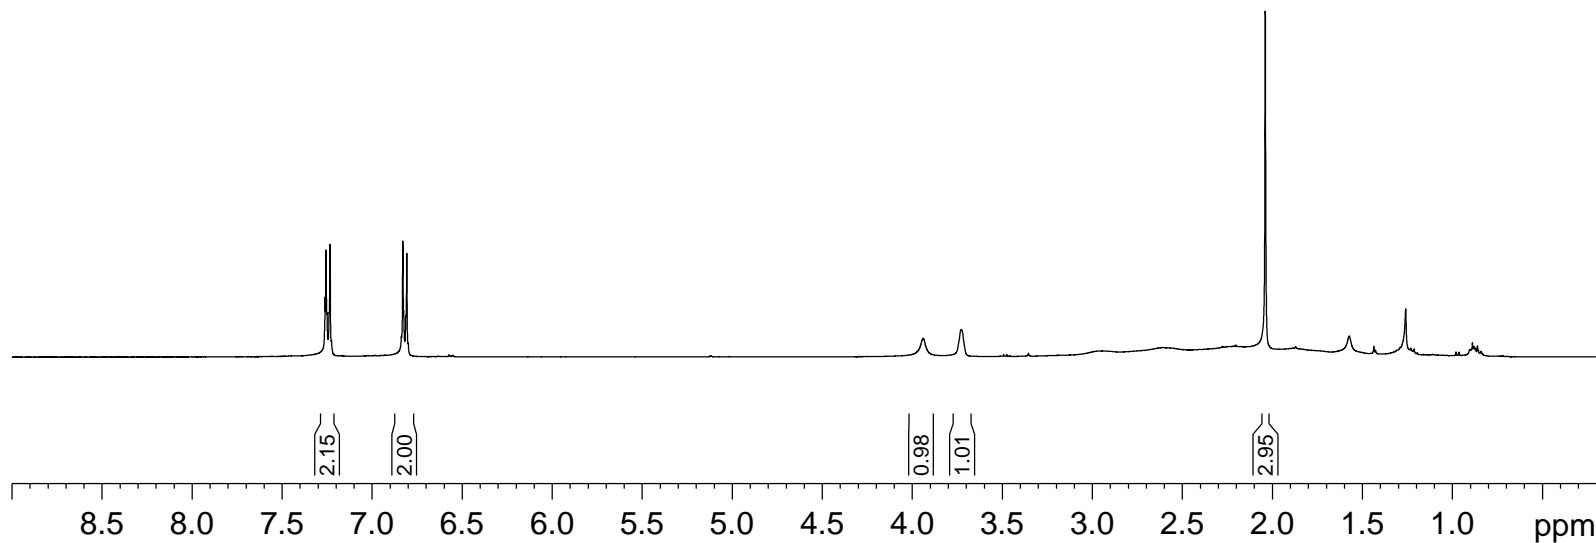

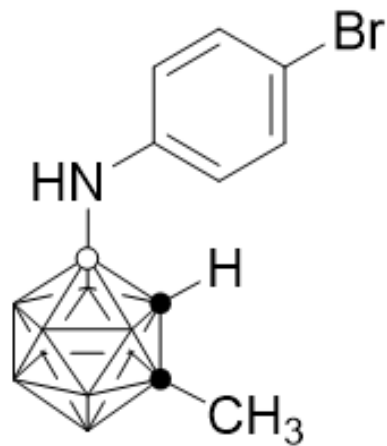

6d

$^{13}\text{C}\{^1\text{H}\}$  NMR (100 MHz,  $\text{CDCl}_3$ )

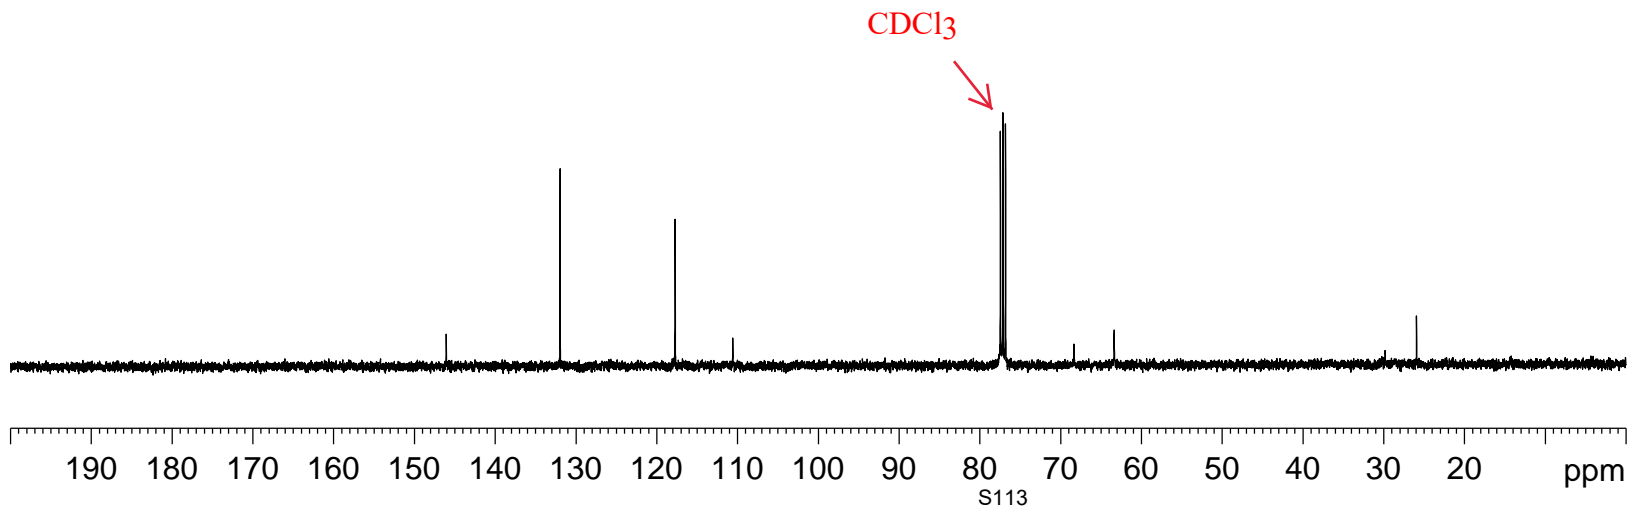

146.05  
131.94  
117.71  
110.58  
77.48  
77.16  
76.84  
68.36  
63.39  
25.96

1hr-C-0529-phnhBr-(

Current Data Parameters  
NAME 1hr-C-0529-phnhBr-CDCl3  
EXPNO 1  
PROCNO 1

F2 - Acquisition Parameters  
Date\_ 20161107  
Time\_ 16.19 h  
INSTRUM spect  
PROBHD Z108618\_0257 (  
PULPROG zgpg30  
TD 65536  
SOLVENT CDCl3  
NS 100  
DS 4  
SWH 29761.904 Hz  
FIDRES 0.454131 Hz  
AQ 1.1010048 sec  
RG 161  
DW 16.800 usec  
DE 6.50 usec  
TE 296.6 K  
D1 2.0000000 sec  
D11 0.03000000 sec  
TD0 1  
SFO1 100.6479773 MHz  
NUC1 13C  
P1 9.50 usec  
PLW1 55.34000015 W  
SFO2 400.2316009 MHz  
NUC2 1H  
CPDPRG[2] waltz16  
PCPD2 90.00 usec  
PLW2 13.56000042 W  
PLW12 0.27428001 W  
PLW13 0.13796000 W

F2 - Processing parameters  
SI 32768  
SF 100.6379020 MHz  
WDW EM  
SSB 0  
LB 1.00 Hz  
GB 0  
PC 1.40

1hr-B-0529-phnhBr-CDCl3

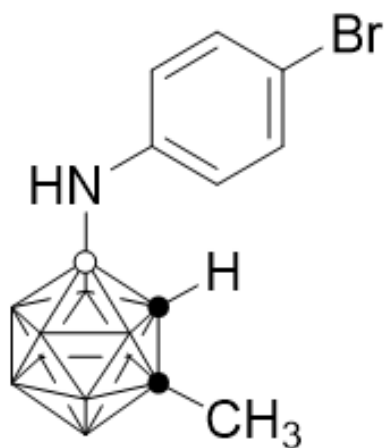

6d

$^{11}\text{B}\{^1\text{H}\}$  NMR (128 MHz,  $\text{CDCl}_3$ )

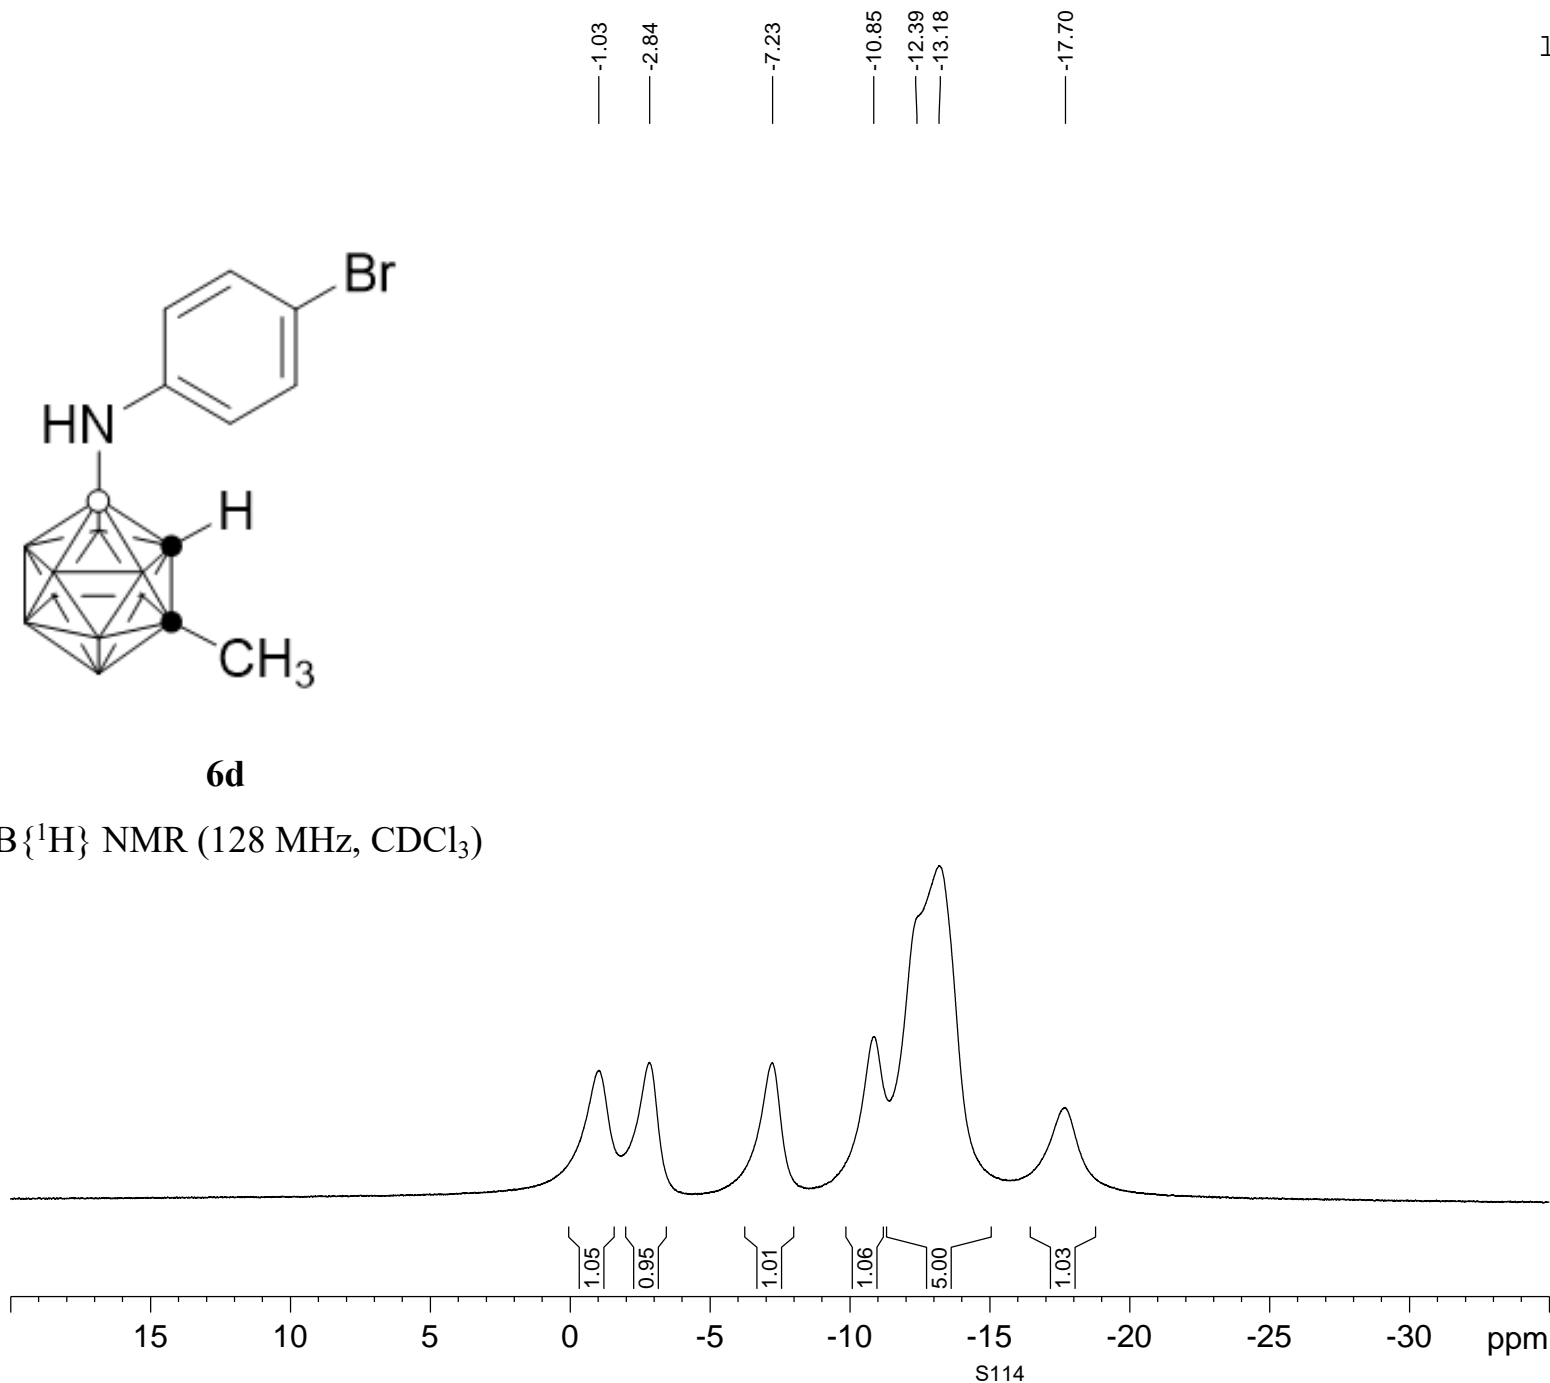

Current Data Parameters  
NAME 1hr-B-0529-phnhBr-CDCl3  
EXPNO 1  
PROCNO 1

F2 - Acquisition Parameters  
Date\_ 20161107  
Time 9.30 h  
INSTRUM spect  
PROBHD z108618\_0257 (  
PULPROG zgdc  
TD 65536  
SOLVENT THF  
NS 12  
DS 4  
SWH 24038.461 Hz  
FIDRES 0.366798 Hz  
AQ 1.3631488 sec  
RG 203  
DW 20.800 usec  
DE 6.50 usec  
TE 296.4 K  
D1 2.00000000 sec  
D11 0.03000000 sec  
TD0 1  
SFO1 128.4096890 MHz  
NUC1 11B  
P1 7.50 usec  
PLW1 55.09999847 W  
SFO2 400.2316009 MHz  
NUC2 1H  
CPDPRG[2] waltz16  
PCPD2 90.00 usec  
PLW2 13.56000042 W  
PLW12 0.27428001 W

F2 - Processing parameters  
SI 32768  
SF 128.4097615 MHz  
WDW EM  
SSB 0  
LB 1.00 Hz  
GB 0  
PC 1.40

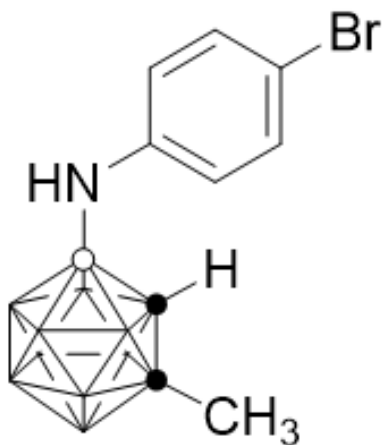

6d

$^{11}\text{B}$  NMR (128 MHz,  $\text{CDCl}_3$ )

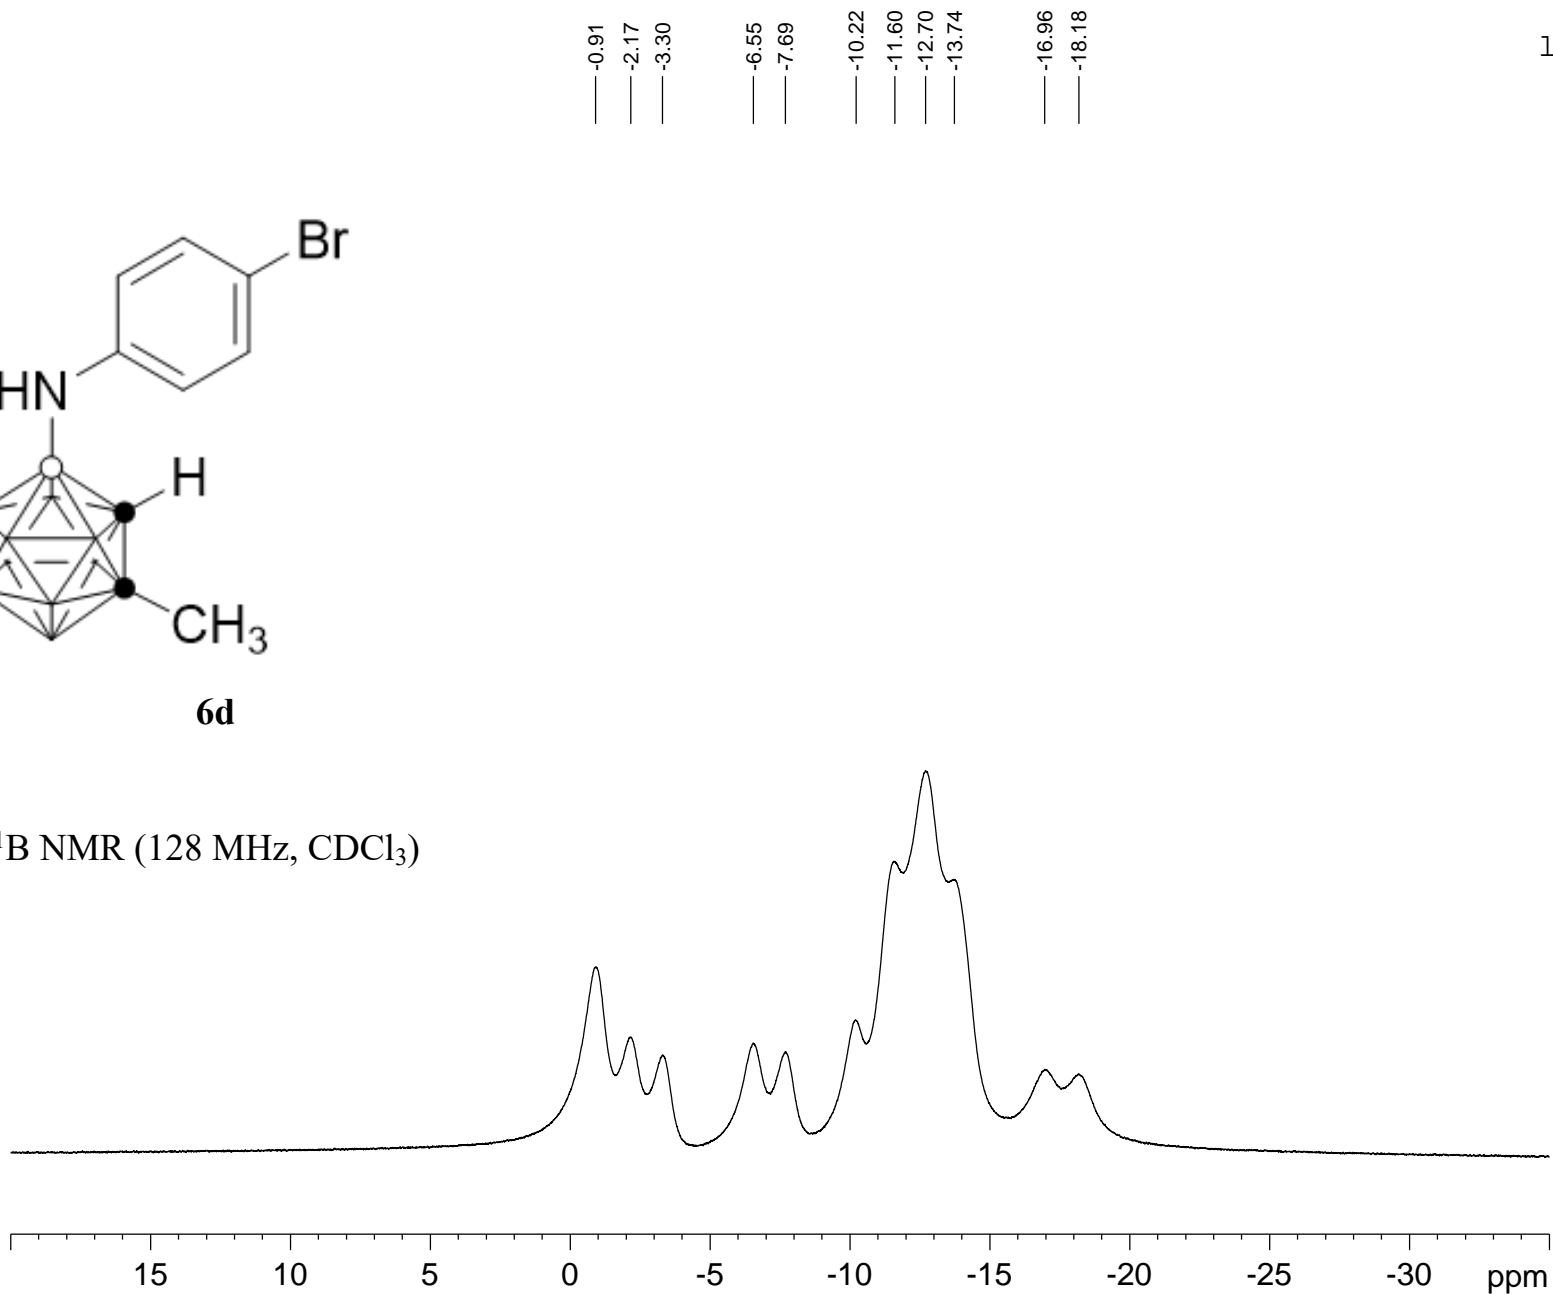

1hr-B-0529-phnhBr- $\text{CDCl}_3$ (C)

Current Data Parameters  
 NAME 1hr-B-0529-phnhBr- $\text{CDCl}_3$ (C)  
 EXPNO 1  
 PROCNO 1

F2 - Acquisition Parameters  
 Date\_ 20161107  
 Time 9.31 h  
 INSTRUM spect  
 PROBHD Z108618\_0257 (  
 PULPROG zg  
 TD 65536  
 SOLVENT THF  
 NS 13  
 DS 2  
 SWH 24038.461 Hz  
 FIDRES 0.366798 Hz  
 AQ 1.3631488 sec  
 RG 203  
 DW 20.800 usec  
 DE 6.50 usec  
 TE 296.1 K  
 D1 2.0000000 sec  
 TD0 1  
 SFO1 128.4096890 MHz  
 NUC1  $^{11}\text{B}$   
 P1 7.50 usec  
 PLW1 55.09999847 W

F2 - Processing parameters  
 SI 32768  
 SF 128.4097504 MHz  
 WDW EM  
 SSB 0  
 LB 1.00 Hz  
 GB 0  
 PC 1.40

zwx2646 #6 RT: 0.53 AV: 1 NL: 5.60E6  
T: + c EI Full ms [ 99.50-800.50]

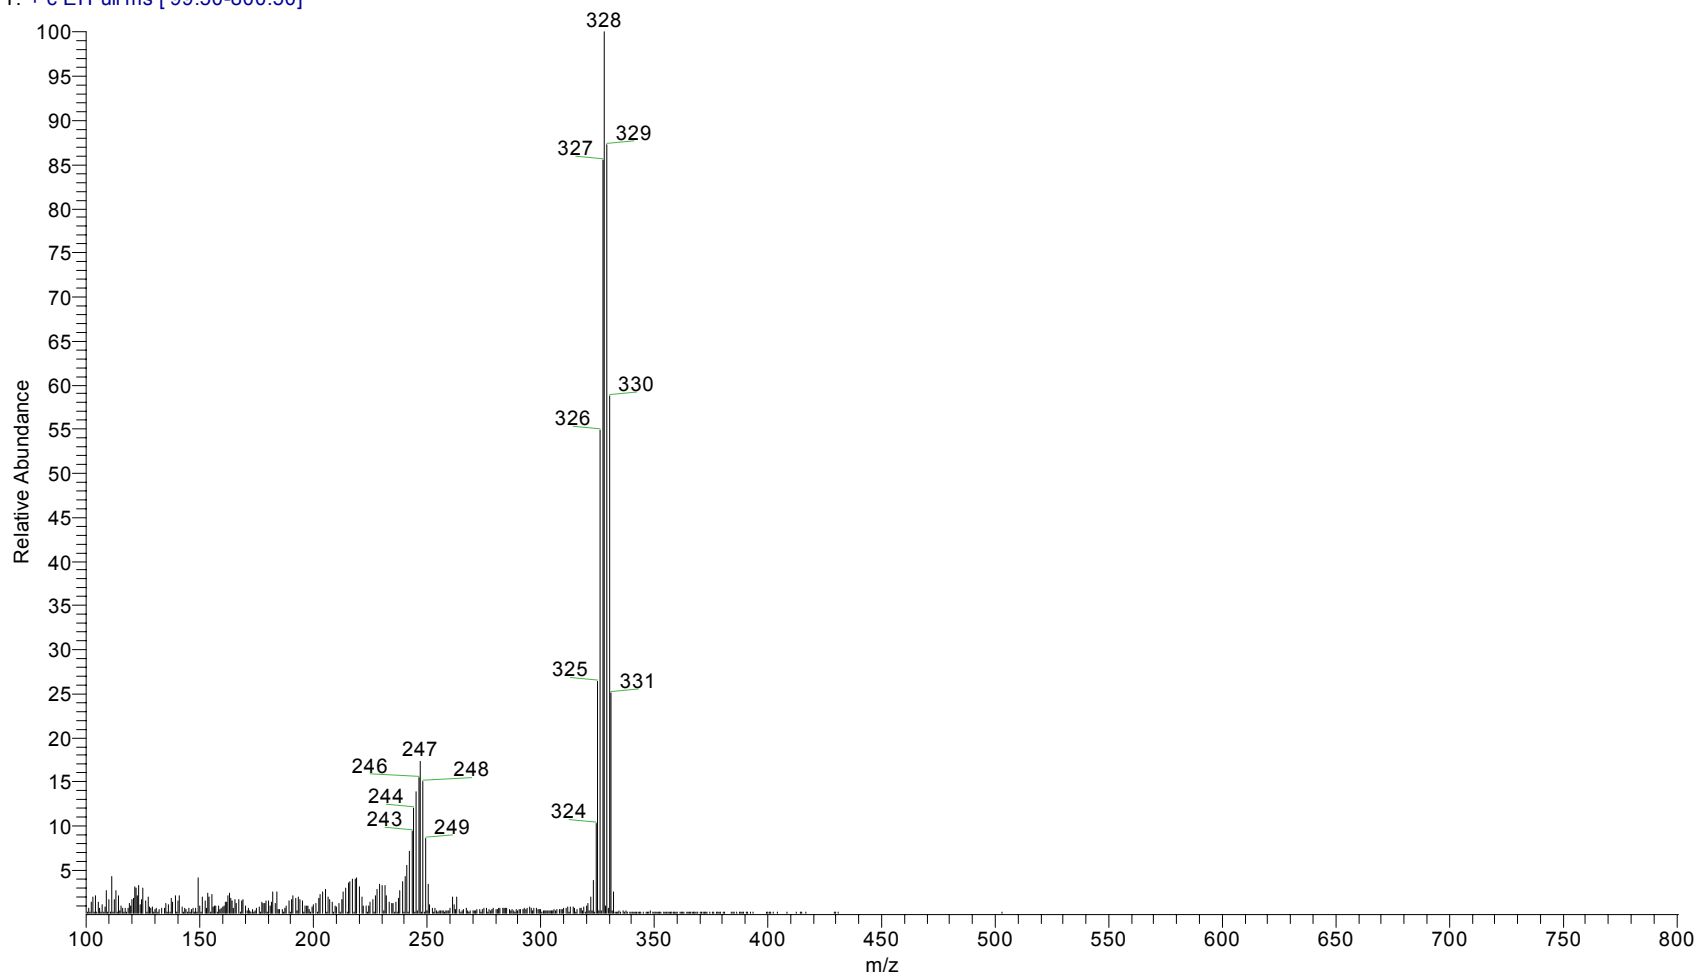



zwx2646 #6 RT: 0.53 AV: 1 NL: 5.60E6  
T: + c EI Full ms [99.50-800.50]

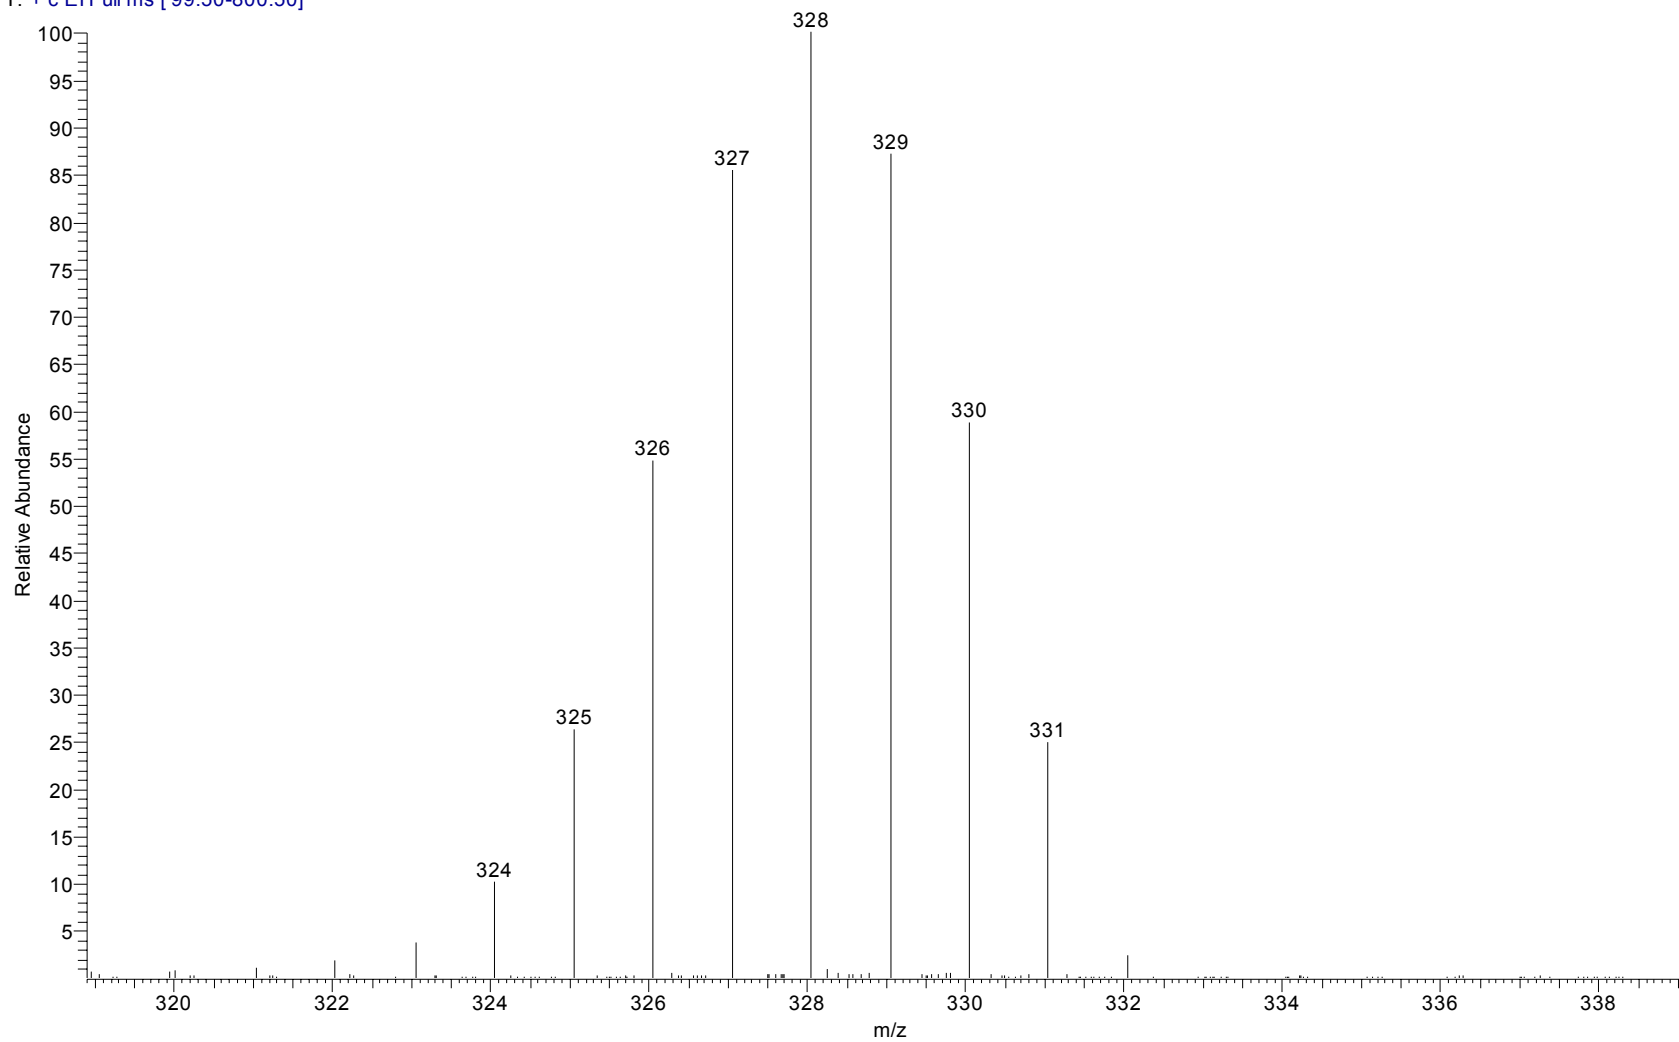

## Accurate Mass Measurement

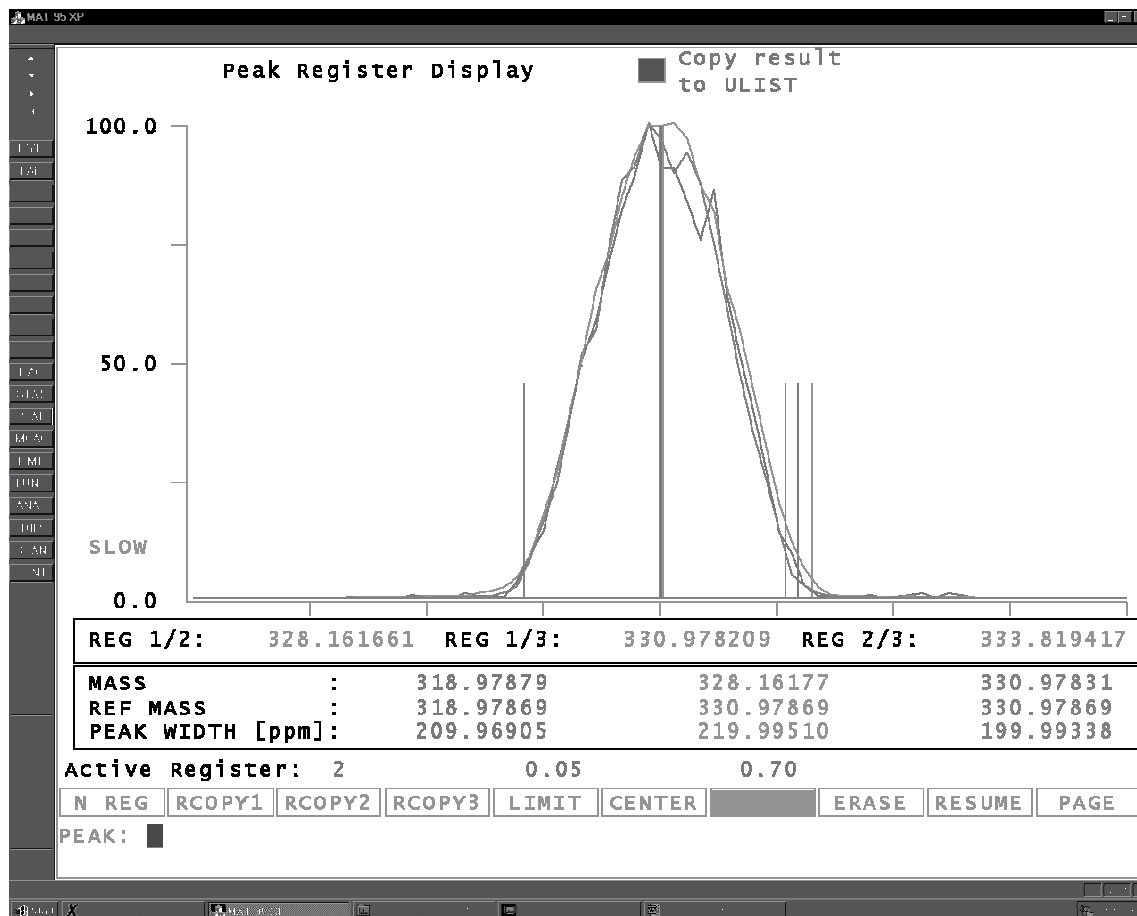

Molecular formula  
 $C_9H_{18}B_{10}BrN$   
[M]<sup>+</sup> (theoretical)  
= 328.1611

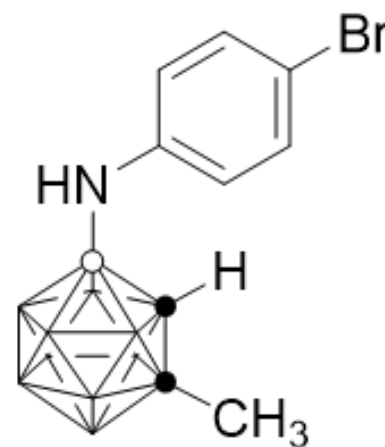

6d

7.439  
7.436  
7.419  
7.416  
7.260  
7.191  
7.187  
7.170  
7.152  
7.149  
6.666  
6.663  
6.647  
6.628  
6.625

4.628

3.788

2.047

1.562

lhr-H-0592-CDCl3

Bruker Advance III 400

Current Data Parameters  
NAME lhr-H-0592-CDCl3  
EXPNO 1  
PROCNO 1

F2 - Acquisition Parameters  
Date\_ 20170114  
Time 10.53 h  
INSTRUM spect  
PROBHD Z824601\_0021 (  
PULPROG zg30  
TD 65536  
SOLVENT CDCl3  
NS 8  
DS 2  
SWH 8012.820 Hz  
FIDRES 0.122266 Hz  
AQ 4.0894465 sec  
RG 203  
DW 62.400 usec  
DE 6.50 usec  
TE 295.0 K  
D1 1.00000000 sec  
TD0 1  
SFO1 400.1324708 MHz  
NUC1 1H  
P1 15.00 usec  
PLW1 8.31000042 W

F2 - Processing parameters  
SI 65536  
SF 400.1300096 MHz  
WDW EM  
SSB 0  
LB 0.30 Hz  
GB 0  
PC 1.00

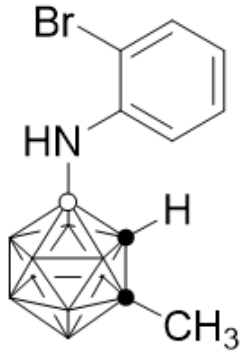

7d

<sup>1</sup>H NMR (400 MHz, CDCl<sub>3</sub>)

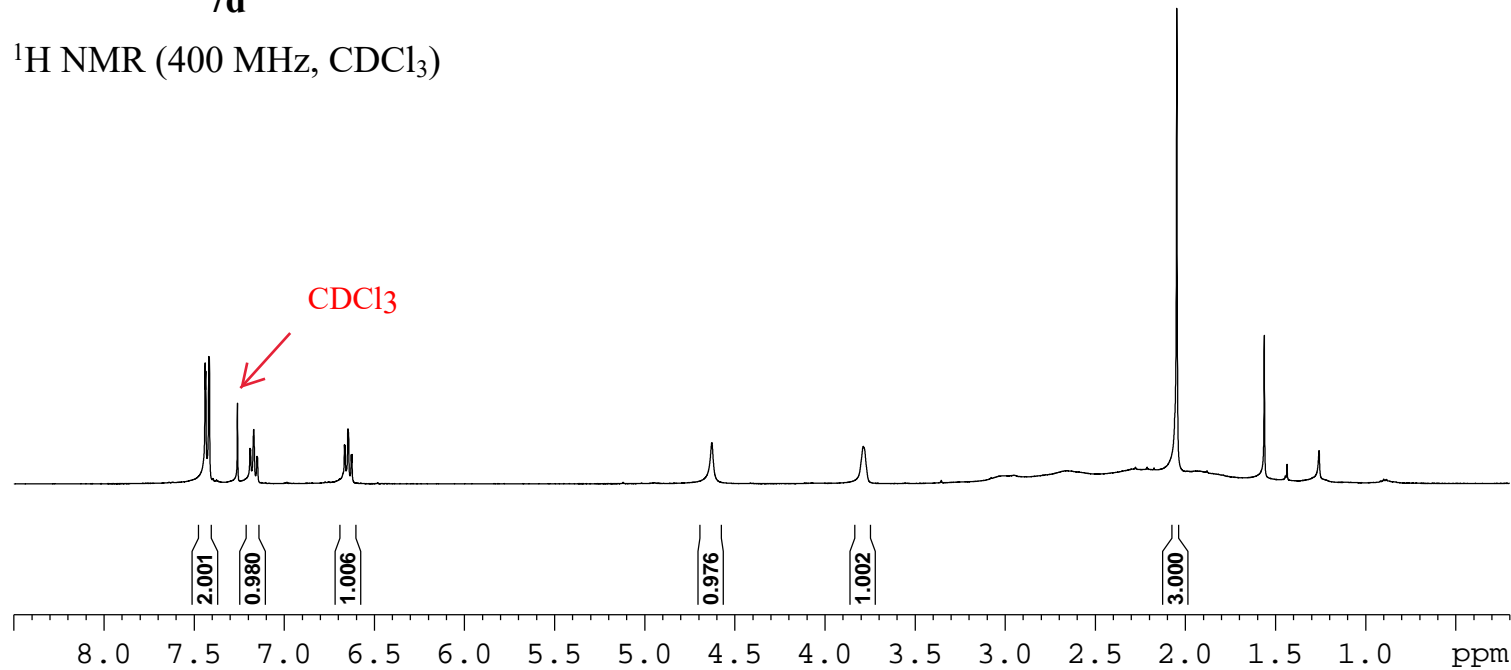

lhr-C-0592-CDCl3

Bruker Advance III 400

Current Data Parameters  
NAME lhr-C-0592-CDCl3  
EXPNO 1  
PROCNO 1

F2 - Acquisition Parameters  
Date\_ 20170114  
Time 14.04 h  
INSTRUM spect  
PROBHD Z824601\_0021 (  
PULPROG zgpg30  
TD 65536  
SOLVENT CDCl3  
NS 738  
DS 4  
SWH 24038.461 Hz  
FIDRES 0.366798 Hz  
AQ 1.3631488 sec  
RG 203  
DW 20.800 usec  
DE 6.50 usec  
TE 295.2 K  
D1 2.0000000 sec  
D11 0.0300000 sec  
TD0 1  
SFO1 100.6228298 MHz  
NUC1 13C  
P1 9.50 usec  
PLW1 41.2500000 W  
SFO2 400.1316005 MHz  
NUC2 1H  
CPDPRG[2] waltz16  
PCPD2 90.00 usec  
PLW2 8.31000042 W  
PLW12 0.23083000 W  
PLW13 0.11611000 W

F2 - Processing parameters  
SI 32768  
SF 100.6127564 MHz  
WDW EM  
SSB 0  
LB 1.00 Hz  
GB 0  
PC 1.40

144.434  
132.558  
128.310  
119.753  
115.577  
112.466

77.478  
77.160  
76.843  
68.385  
63.715

25.962

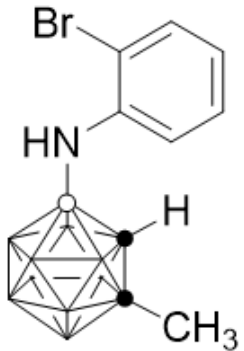

7d

$^{13}\text{C}\{^1\text{H}\}$  NMR (100 MHz,  $\text{CDCl}_3$ )

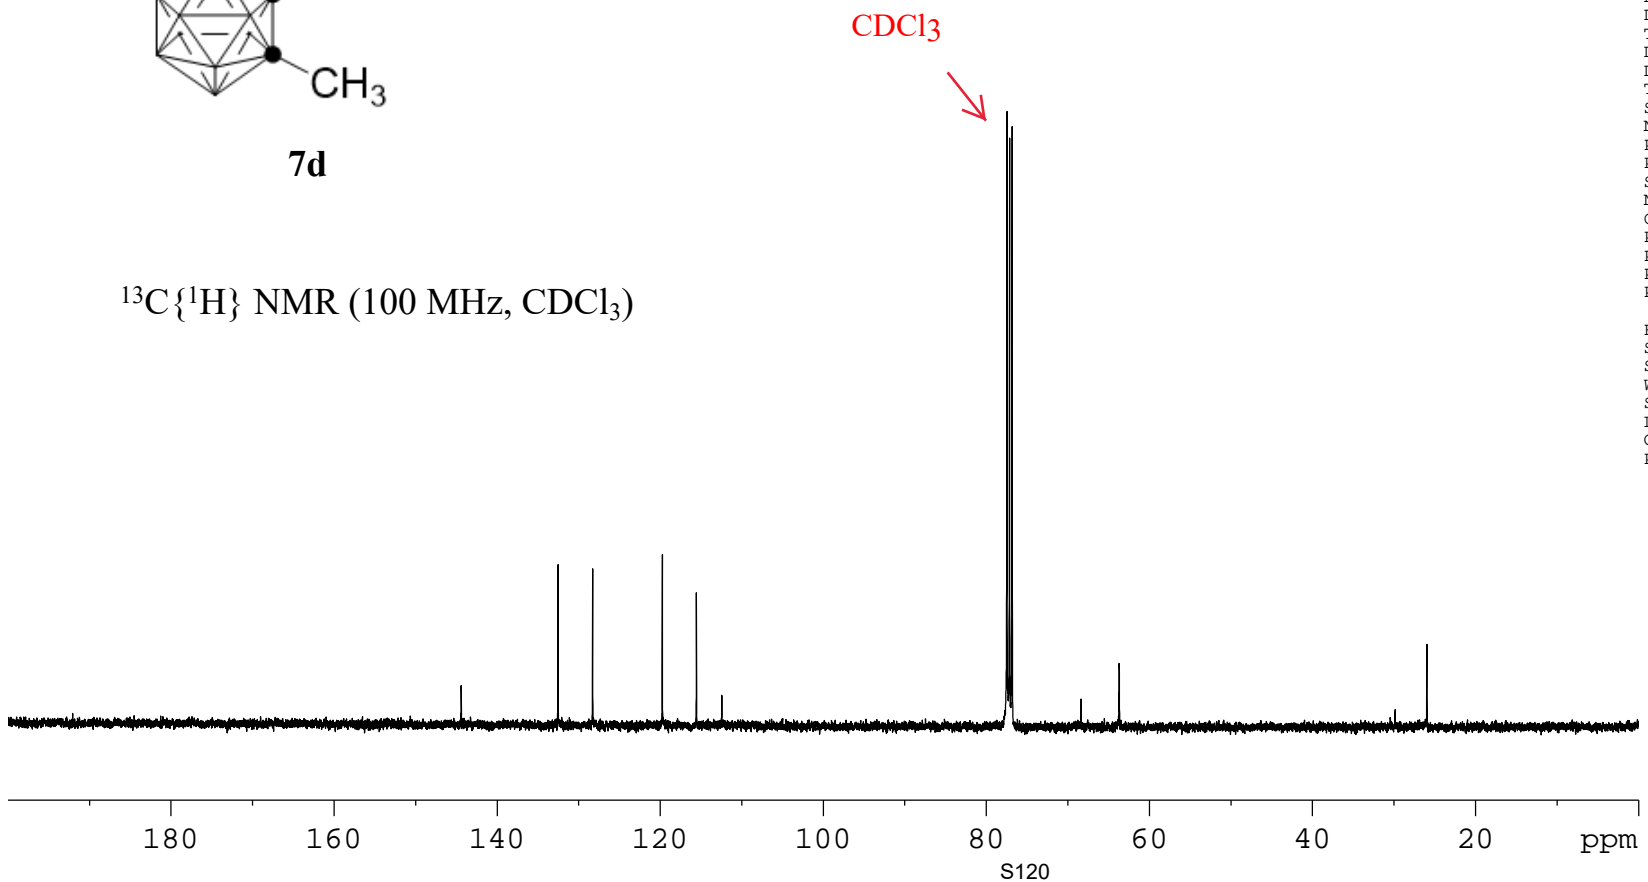

S120

1hr-B-0592-CDC13

Current Data Parameters  
NAME 1hr-B-0592-CDC13  
EXPNO 1  
PROCNO 1

F2 - Acquisition Parameters  
Date\_ 20170114  
Time 10.43 h  
INSTRUM spect  
PROBHD z108618\_0257 (  
PULPROG zgdc  
TD 65536  
SOLVENT CDC13  
NS 12  
DS 4  
SWH 24038.461 Hz  
FIDRES 0.366798 Hz  
AQ 1.3631488 sec  
RG 406  
DW 20.800 usec  
DE 6.50 usec  
TE 295.5 K  
D1 2.0000000 sec  
D11 0.0300000 sec  
TD0 1  
SFO1 128.4096890 MHz  
NUC1 11B  
P1 7.50 usec  
PLW1 55.09999847 W  
SFO2 400.2316009 MHz  
NUC2 1H  
CPDPRG[2] waltz16  
PCPD2 90.00 usec  
PLW2 13.56000042 W  
PLW12 0.27428001 W

F2 - Processing parameters  
SI 32768  
SF 128.4097615 MHz  
WDW EM  
SSB 0  
LB 1.00 Hz  
GB 0  
PC 1.40

— -0.95  
— -2.74  
— -7.18  
— -10.65  
— -12.16  
— -13.04  
— -17.48

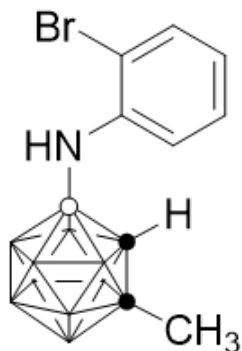

7d

$^{11}\text{B}\{^1\text{H}\}$  NMR (128 MHz,  $\text{CDCl}_3$ )

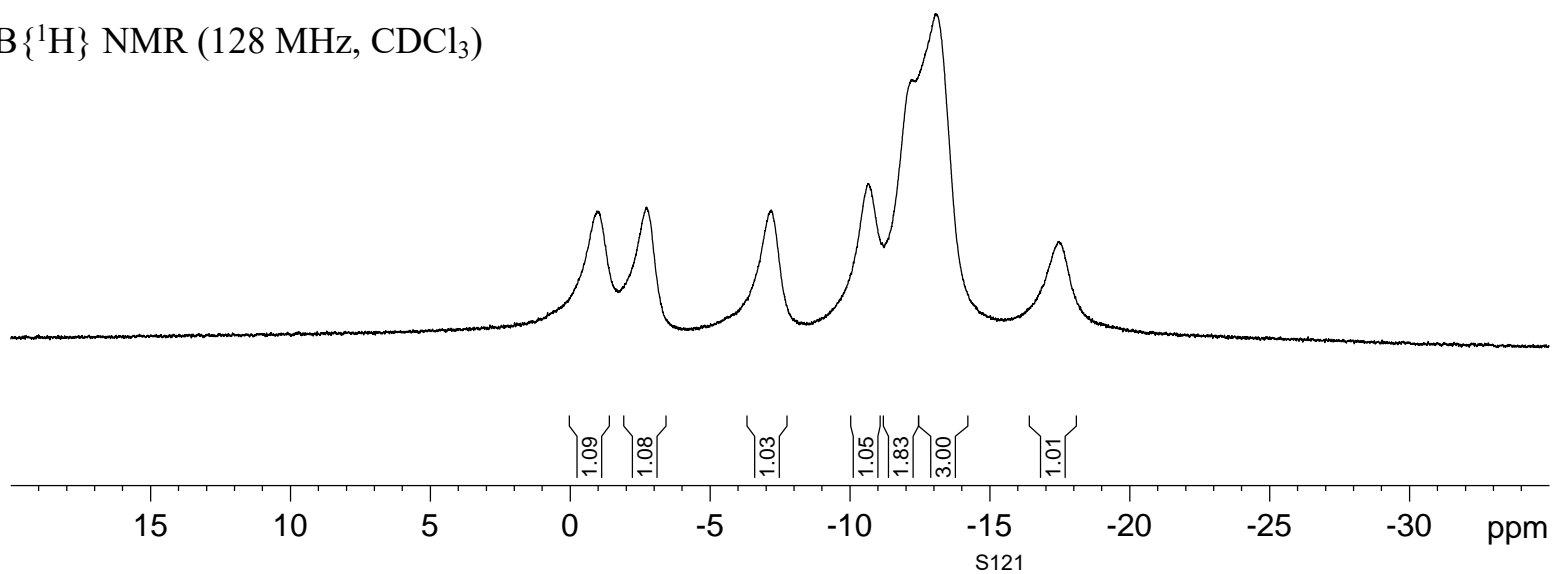

1hr-B-0592-CDCl3(C)

Current Data Parameters  
NAME 1hr-B-0592-CDCl3(C)  
EXPNO 1  
PROCNO 1

F2 - Acquisition Parameters  
Date\_ 20170114  
Time 10.46 h  
INSTRUM spect  
PROBHD z108618\_0257 (  
PULPROG zg  
TD 65536  
SOLVENT CDCl3  
NS 32  
DS 2  
SWH 24038.461 Hz  
FIDRES 0.366798 Hz  
AQ 1.3631488 sec  
RG 203  
DW 20.800 usec  
DE 6.50 usec  
TE 295.4 K  
D1 2.00000000 sec  
TD0 1  
SFO1 128.4096890 MHz  
NUC1 11B  
P1 7.50 usec  
PLW1 55.09999847 W

F2 - Processing parameters  
SI 32768  
SF 128.4097430 MHz  
WDW EM  
SSB 0  
LB 1.00 Hz  
GB 0  
PC 1.40

— -0.81  
— -2.00  
— -3.16  
  
— -6.43  
— -7.62  
  
— -9.95  
— -11.32  
— -12.47  
— -13.63  
  
— -16.73  
— -18.01

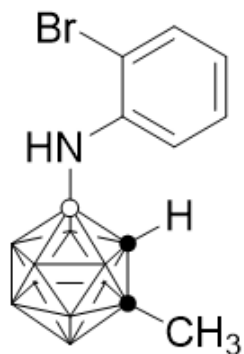

7d

$^{11}\text{B}$  NMR (128 MHz,  $\text{CDCl}_3$ )

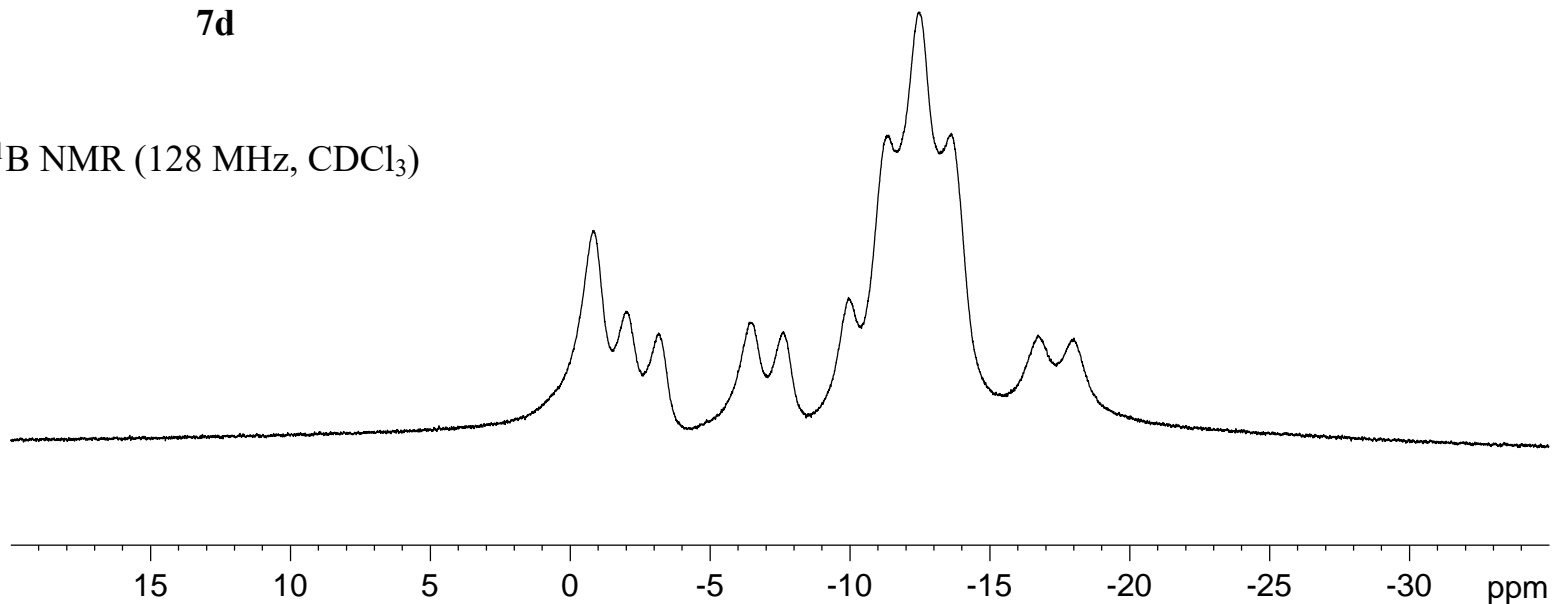

zwx2646 #6 RT: 0.53 AV: 1 NL: 5.60E6  
T: + c EI Full ms [ 99.50-800.50]

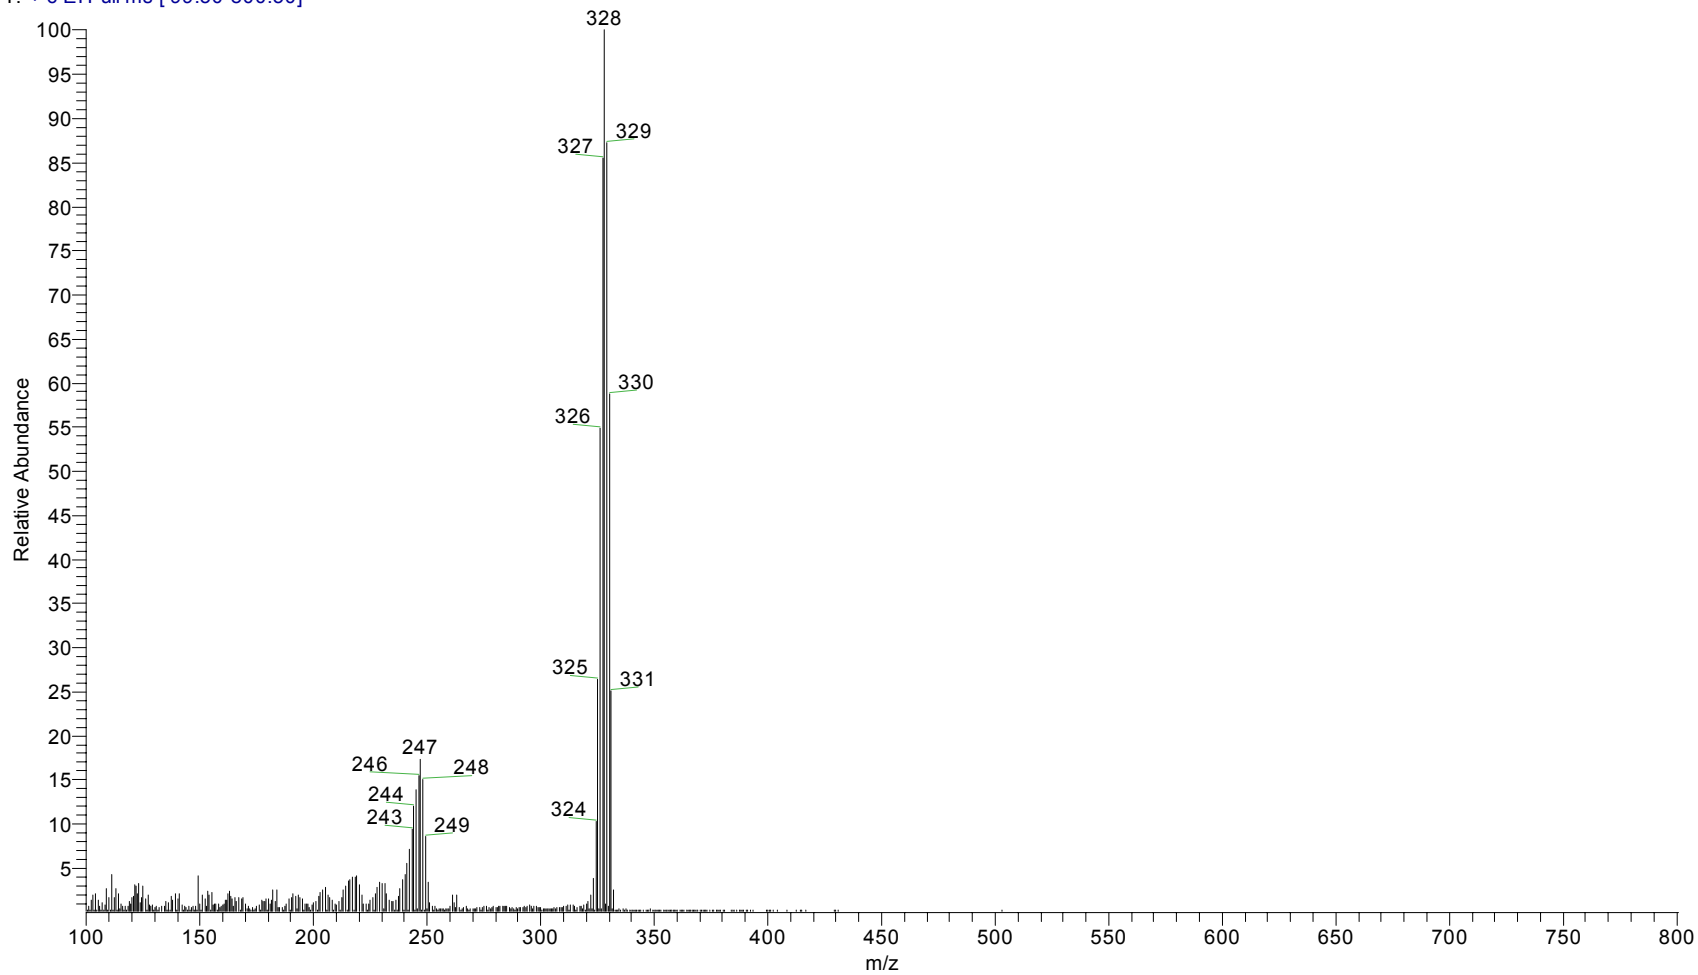

zwx2646 #6 RT: 0.53 AV: 1 NL: 5.60E6  
T: + c EI Full ms [99.50-800.50]





## Accurate Mass Measurement



Molecular formula  
 $C_9H_{18}B_{10}BrN$   
[M]<sup>+</sup> (theoretical)  
= 328.1611

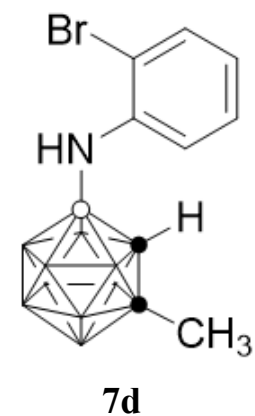

1hr-H-0514-phnhF-CDCl3

Bruker Advance III 400

Current Data Parameters  
NAME 1hr-H-0514-phnhF-CDCl3  
EXPNO 1  
PROCNO 1

F2 - Acquisition Parameters  
Date\_ 20161027  
Time 17.03 h  
INSTRUM spect  
PROBHD Z824601\_0021 (  
PULPROG zg30  
TD 65536  
SOLVENT CDCl3  
NS 12  
DS 2  
SWH 8012.820 Hz  
FIDRES 0.122266 Hz  
AQ 4.0894465 sec  
RG 203  
DW 62.400 usec  
DE 6.50 usec  
TE 295.0 K  
D1 1.00000000 sec  
TD0 1  
SFO1 400.1324708 MHz  
NUC1 1H  
P1 15.00 usec  
PLW1 8.31000042 W

F2 - Processing parameters  
SI 65536  
SF 400.1300101 MHz  
WDW EM  
SSB 0  
LB 0.30 Hz  
GB 0  
PC 1.00

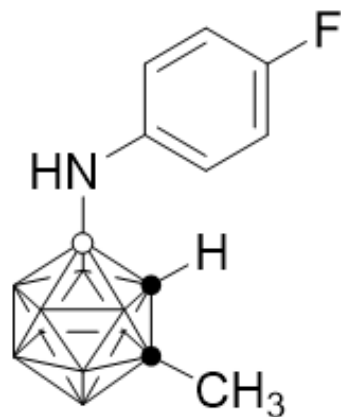

**8d**  
<sup>1</sup>H NMR (400 MHz, CDCl<sub>3</sub>)

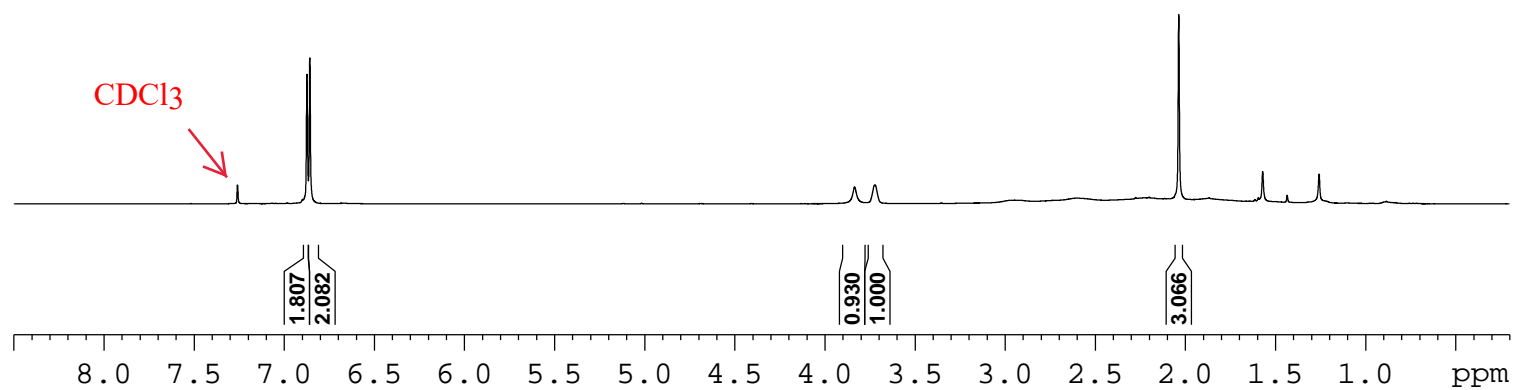

7.260  
6.874  
6.859

3.835  
3.723

2.036

lhr-C-0514-phnhF-CDCl3

Bruker Advance III 400

Current Data Parameters

NAME lhr-C-0514-phnhF-CDCl3  
EXPNO 1  
PROCNO 1

F2 - Acquisition Parameters

Date\_ 20161027  
Time 17.40 h  
INSTRUM spect  
PROBHD Z824601\_0021 (  
PULPROG zgpg30  
TD 65536  
SOLVENT CDCl3  
NS 152  
DS 4  
SWH 24038.461 Hz  
FIDRES 0.366798 Hz  
AQ 1.3631488 sec  
RG 203  
DW 20.800 usec  
DE 6.50 usec  
TE 295.6 K  
D1 2.00000000 sec  
D11 0.03000000 sec  
TD0 1  
SFO1 100.6228298 MHz  
NUC1 13C  
P1 9.50 usec  
PLW1 41.25000000 W  
SFO2 400.1316005 MHz  
NUC2 1H  
CPDPRG[2] waltz16  
PCPD2 90.00 usec  
PLW2 8.31000042 W  
PLW12 0.23083000 W  
PLW13 0.11611000 W

F2 - Processing parameters

SI 32768  
SF 100.6127566 MHz  
WDW EM  
SSB 0  
LB 1.00 Hz  
GB 0  
PC 1.40

157.722  
155.369  
143.037

117.132  
117.058  
115.707  
115.486

77.477  
77.160  
76.842  
68.277  
63.422

25.963

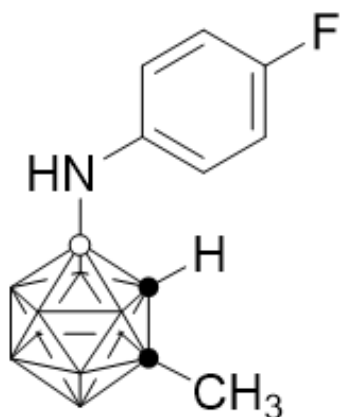

8d

<sup>13</sup>C {<sup>1</sup>H} NMR (100 MHz, CDCl<sub>3</sub>)

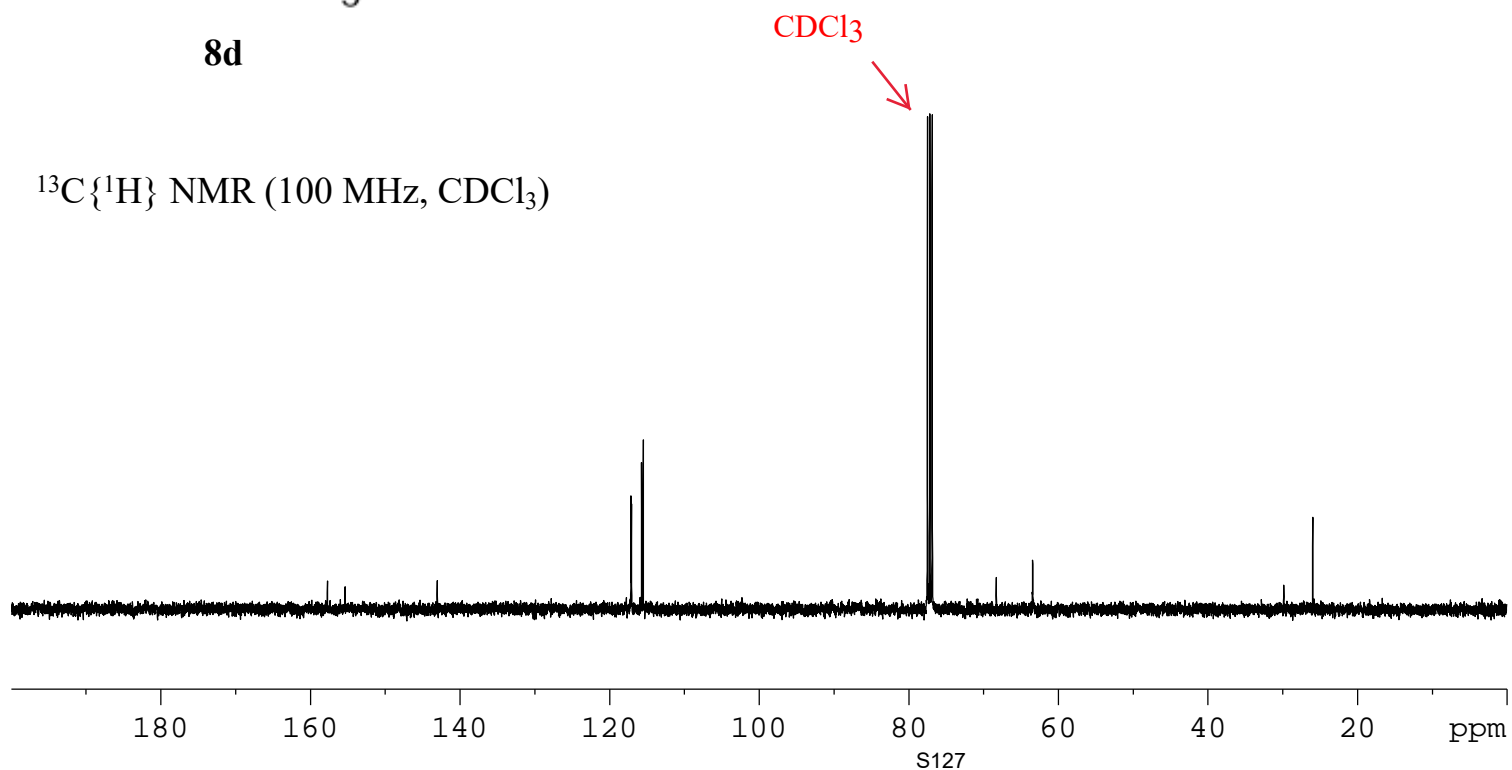

S127

1hr-B-0514-phnh2F-CDCl3

Current Data Parameters  
NAME 1hr-B-0514-phnh2F-CDCl3  
EXPNO 1  
PROCNO 1

F2 - Acquisition Parameters  
Date\_ 20161029  
Time 9.17 h  
INSTRUM spect  
PROBHD Z108618\_0257 (  
PULPROG zgdc  
TD 65536  
SOLVENT CDCl3  
NS 12  
DS 4  
SWH 24038.461 Hz  
FIDRES 0.366798 Hz  
AQ 1.3631488 sec  
RG 287  
DW 20.800 usec  
DE 6.50 usec  
TE 294.8 K  
D1 2.0000000 sec  
D11 0.0300000 sec  
TD0 1  
SFO1 128.4096890 MHz  
NUC1 11B  
P1 7.50 usec  
PLW1 55.09999847 W  
SFO2 400.2316009 MHz  
NUC2 1H  
CPDPRG[2] waltz16  
PCPD2 90.00 usec  
PLW2 13.56000042 W  
PLW12 0.27428001 W

F2 - Processing parameters  
SI 32768  
SF 128.4097615 MHz  
WDW EM  
SSB 0  
LB 1.00 Hz  
GB 0  
PC 1.40

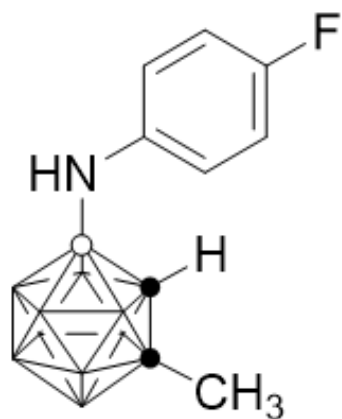

8d

$^{11}\text{B}\{^1\text{H}\}$  NMR (128 MHz,  $\text{CDCl}_3$ )

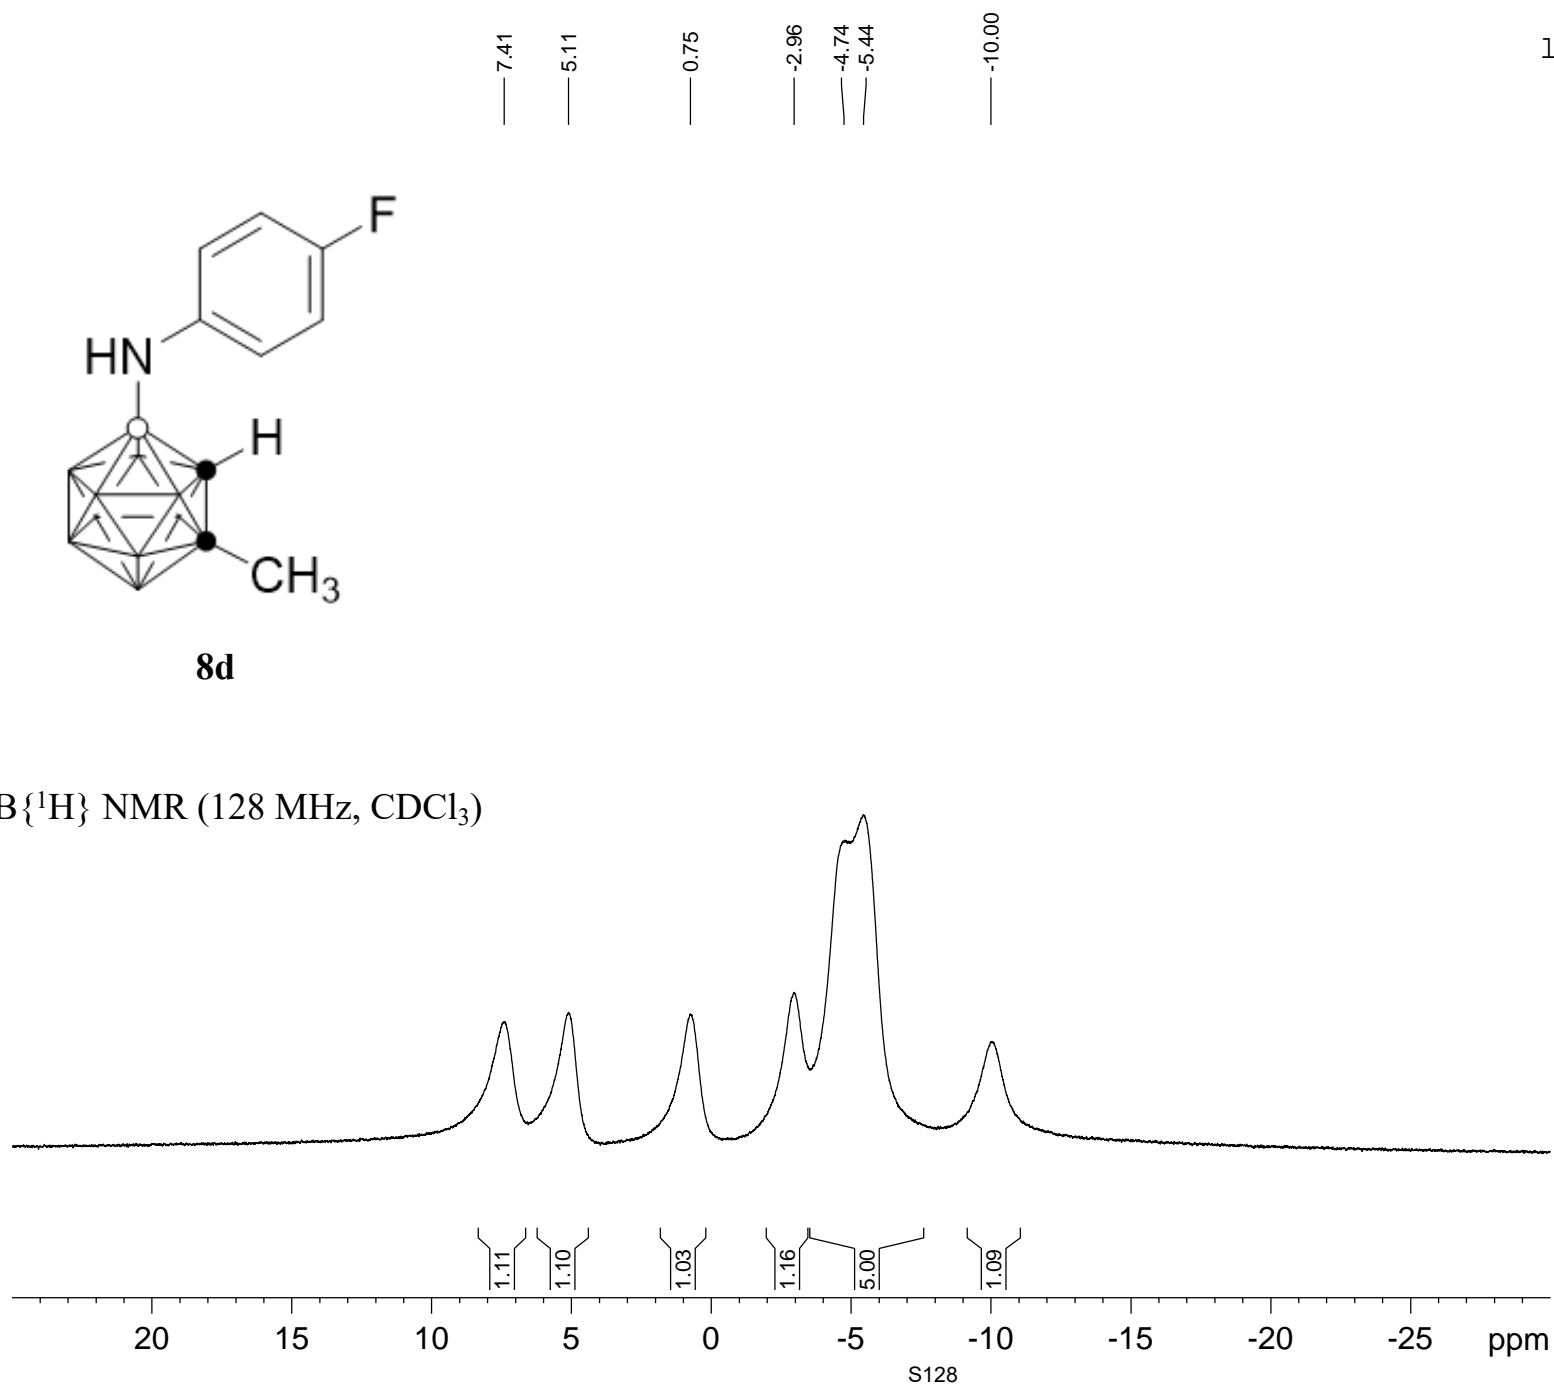

lhr-B-0514-phnh2F-CDCl3 (

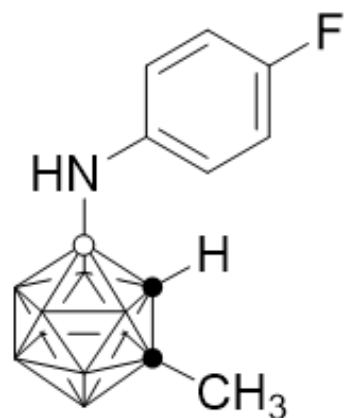

8d

<sup>11</sup>B NMR (128 MHz, CDCl<sub>3</sub>)

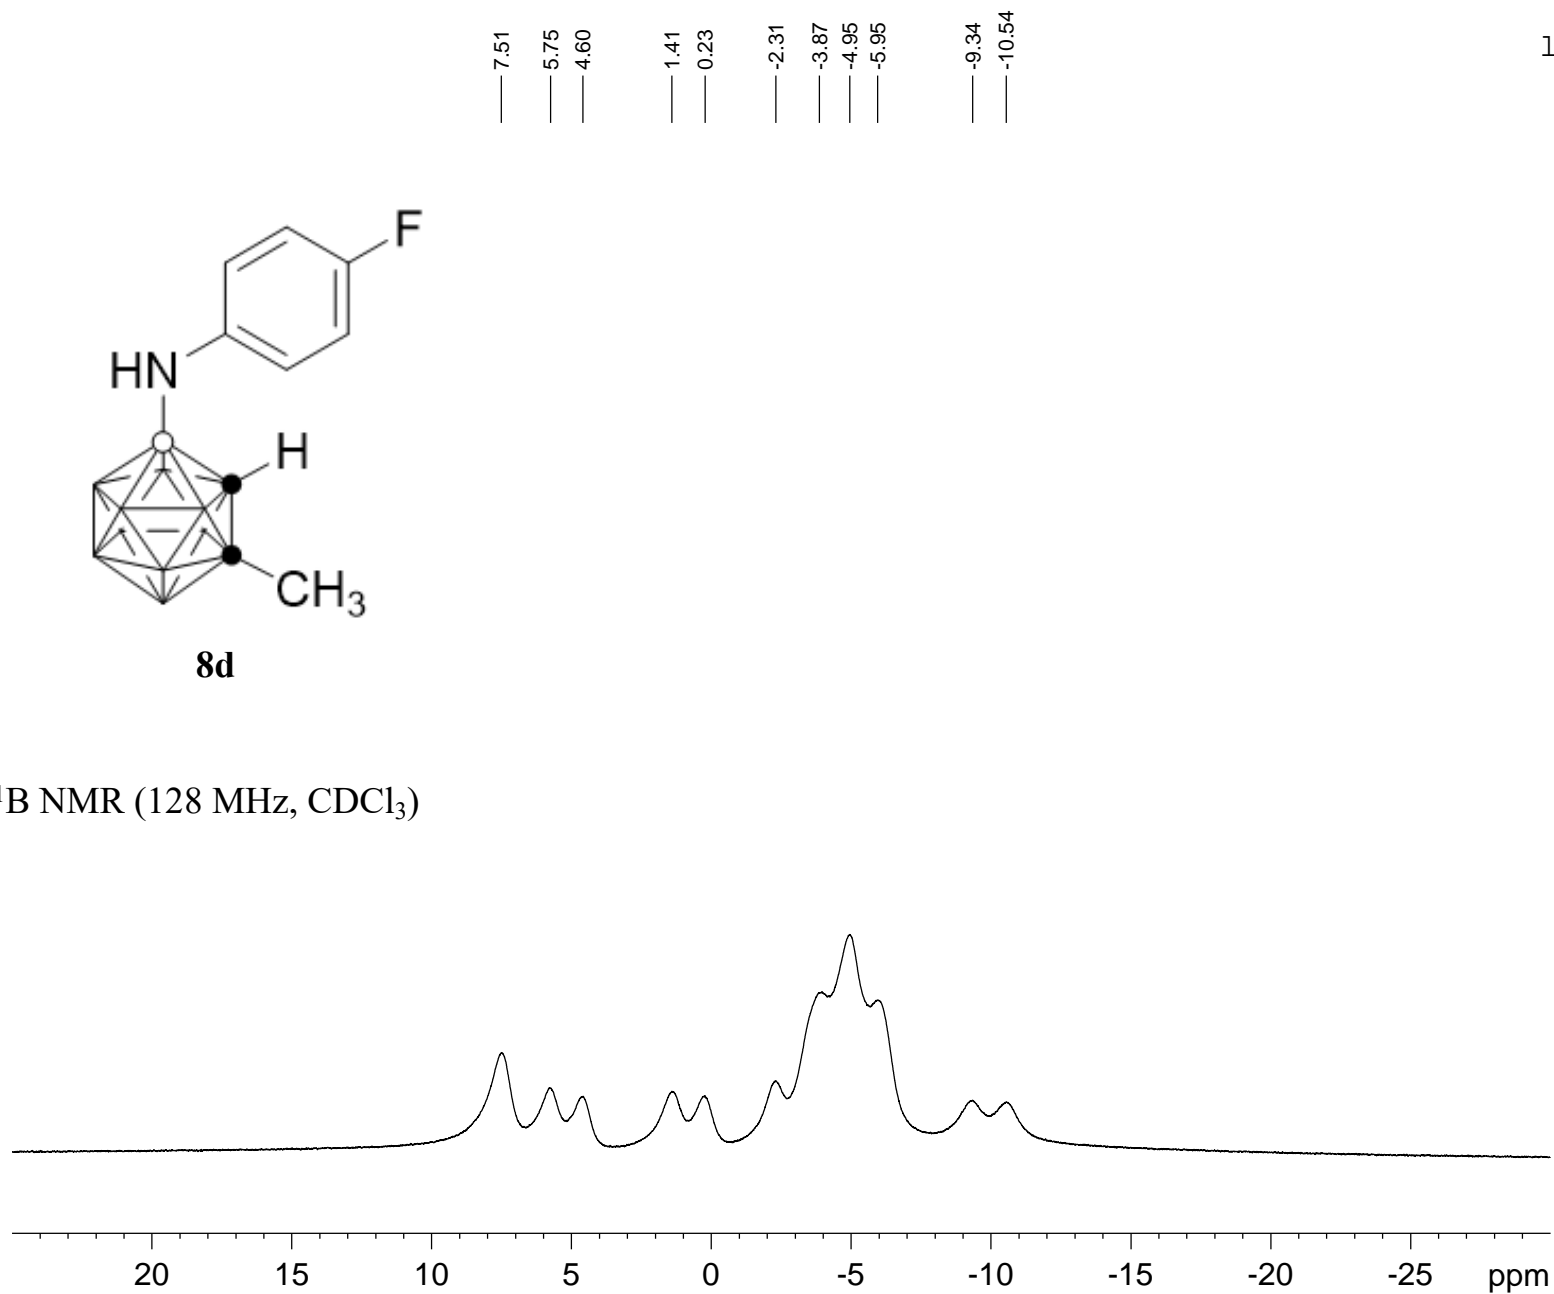

Current Data Parameters  
NAME lhr-B-0514-phnh2F-CDCl3(C)  
EXPNO 1  
PROCNO 1

F2 - Acquisition Parameters  
Date\_ 20161029  
Time 9.20 h  
INSTRUM spect  
PROBHD Z108618\_0257 (  
PULPROG zg  
TD 65536  
SOLVENT CDCl3  
NS 26  
DS 2  
SWH 24038.461 Hz  
FIDRES 0.366798 Hz  
AQ 1.3631488 sec  
RG 287  
DW 20.800 usec  
DE 6.50 usec  
TE 294.4 K  
D1 2.00000000 sec  
TD0 1  
SF01 128.4096890 MHz  
NUC1 11B  
P1 7.50 usec  
PLW1 55.09999847 W

F2 - Processing parameters  
SI 32768  
SF 128.4097504 MHz  
WDW EM  
SSB 0  
LB 1.00 Hz  
GB 0  
PC 1.40

— -125.75

lhr-F-0514-phnh2F-CDCl<sub>3</sub>

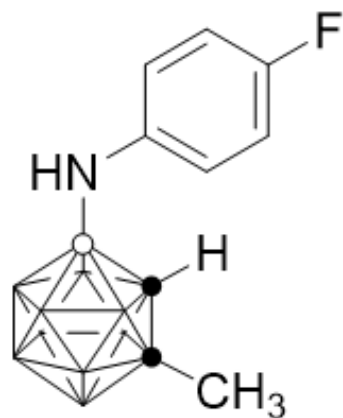

8d

<sup>19</sup>F{<sup>1</sup>H} NMR (376 MHz, CDCl<sub>3</sub>)

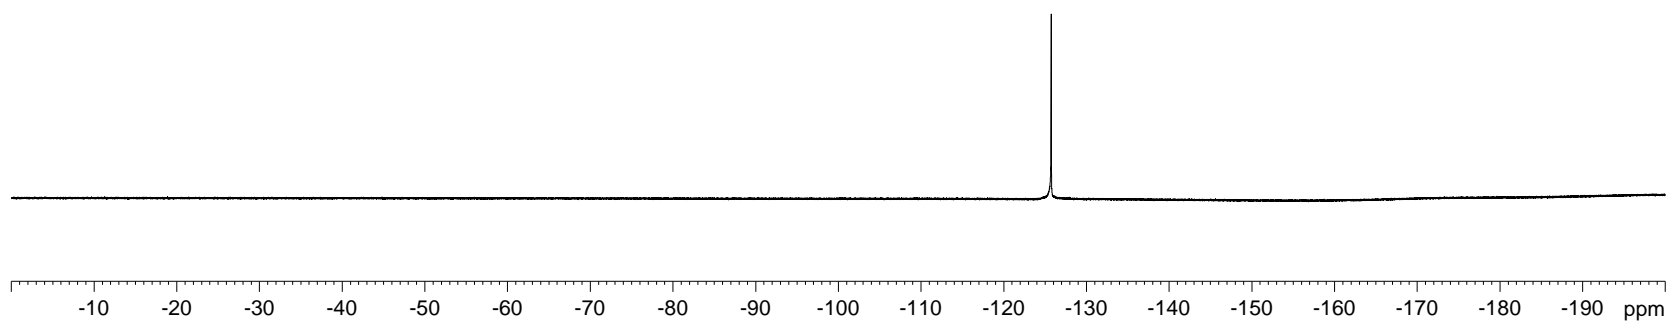

Current Data Parameters  
NAME lhr-F-0514-phnh2F-CDCl<sub>3</sub>  
EXPNO 1  
PROCNO 1

F2 - Acquisition Parameters  
Date\_ 20161029  
Time 9.54 h  
INSTRUM spect  
PROBHD Z108618\_0257 (  
PULPROG zgfhigcn.2  
TD 131072  
SOLVENT CDCl<sub>3</sub>  
NS 16  
DS 4  
SWH 89285.711 Hz  
FIDRES 0.681196 Hz  
AQ 0.7340032 sec  
RG 645  
DW 5.600 usec  
DE 6.50 usec  
TE 294.7 K  
D1 1.0000000 sec  
D11 0.0300000 sec  
D12 0.0000200 sec  
TD0 1  
SFO1 376.5548010 MHz  
NUC1 19F  
P1 14.70 usec  
PLW1 18.3600061 W  
SFO2 400.2316009 MHz  
NUC2 1H  
CPDPRG[2] waltz16  
PCPD2 90.00 usec  
PLW2 13.5600042 W  
PLW12 0.27428001 W

F2 - Processing parameters  
SI 65536  
SF 376.5924602 MHz  
WDW EM  
SSB 0  
LB 0.30 Hz  
GB 0  
PC 1.00

lhr-F-0514-phnh2F-CDCl3

Current Data Parameters  
NAME lhr-F-0514-phnh2F-CDCl3(C)  
EXPNO 1  
PROCNO 1

F2 - Acquisition Parameters  
Date\_ 20161029  
Time 9.55 h  
INSTRUM spect  
PROBHD Z108618\_0257 (  
PULPROG zgfhigcn.2  
TD 131072  
SOLVENT CDCl3  
NS 16  
DS 4  
SWH 89285.711 Hz  
FIDRES 0.681196 Hz  
AQ 0.7340032 sec  
RG 645  
DW 5.600 usec  
DE 6.50 usec  
TE 294.8 K  
D1 1.0000000 sec  
D11 0.0300000 sec  
D12 0.0000200 sec  
TD0 1  
SF01 376.5548010 MHz  
NUC1 19F  
P1 14.70 usec  
PLW1 18.3600061 W  
SF02 400.2316009 MHz  
NUC2 1H  
CPDPRG2 waltz16  
PCPD2 90.00 usec  
PLW2 13.5600042 W  
PLW12 0.27428001 W

F2 - Processing parameters  
SI 65536  
SF 376.5924602 MHz  
WDW EM  
SSB 0  
LB 0.30 Hz  
GB 0  
PC 1.00

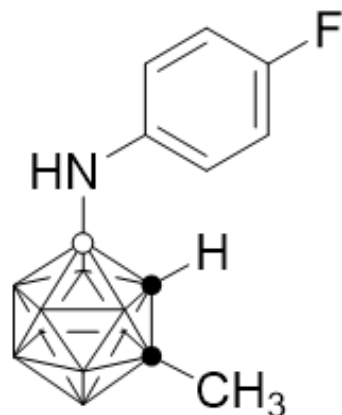

8d

$^{19}\text{F}$  NMR (376 MHz,  $\text{CDCl}_3$ )

-125.73

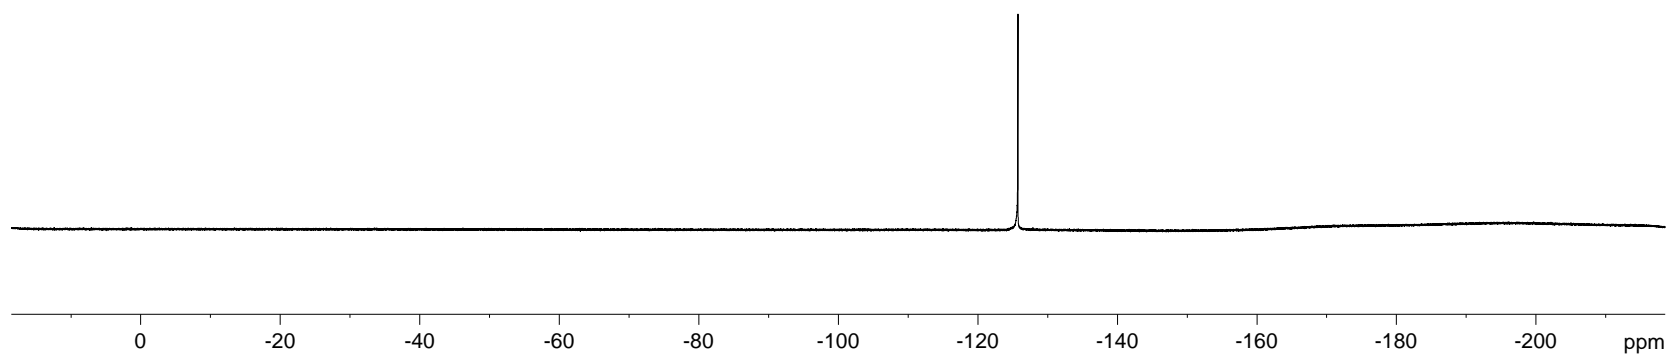

# Thermo QEFMS Analysis Report

## Analysis Info

|               |                                        |                |          |
|---------------|----------------------------------------|----------------|----------|
| Sample Name : | Lhr-514                                | Reference No.: | Qzwx052  |
| Instrument :  | Q Exactive Focus Orbitrap              |                |          |
| Source :      | HESI II                                | Polarity :     | Positive |
| Comment :     | ESI pos, 3.5kV, by LC, with sheath gas |                |          |

## Accurate Mass Measurement

|                                        |                                                   |
|----------------------------------------|---------------------------------------------------|
| Molecular formula :                    | C <sub>9</sub> H <sub>18</sub> B <sub>10</sub> FN |
| Experimental Mass [M+H] <sup>+</sup> : | 268.24962                                         |
| Theoretical Mass [M+H] <sup>+</sup> :  | 268.24992                                         |
| Error (ppm) :                          | 1.1                                               |

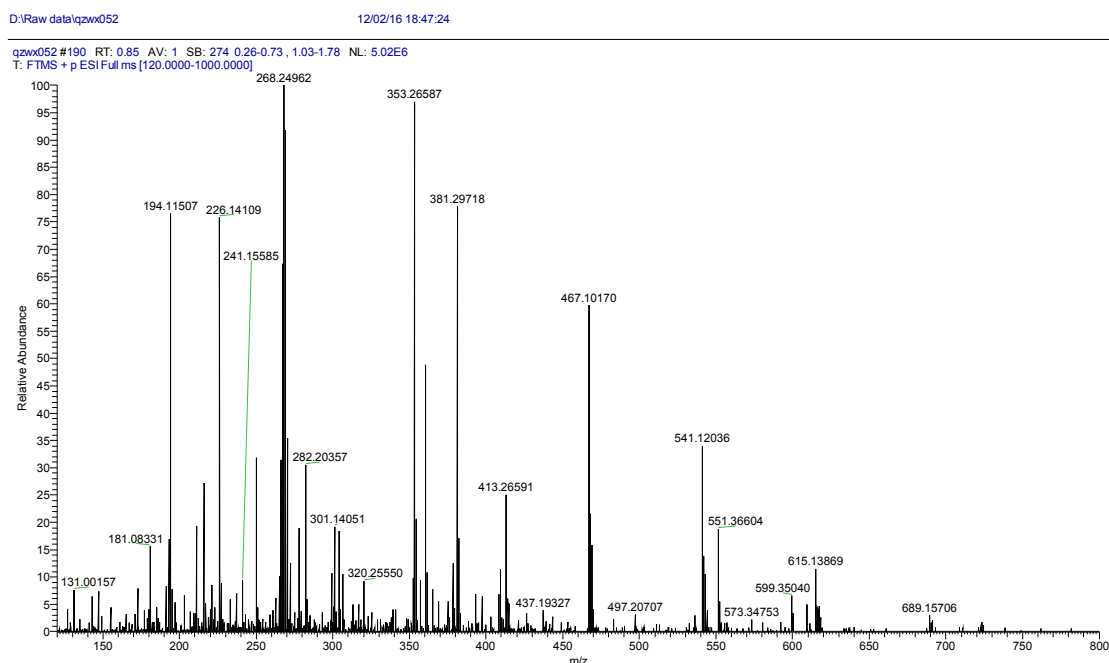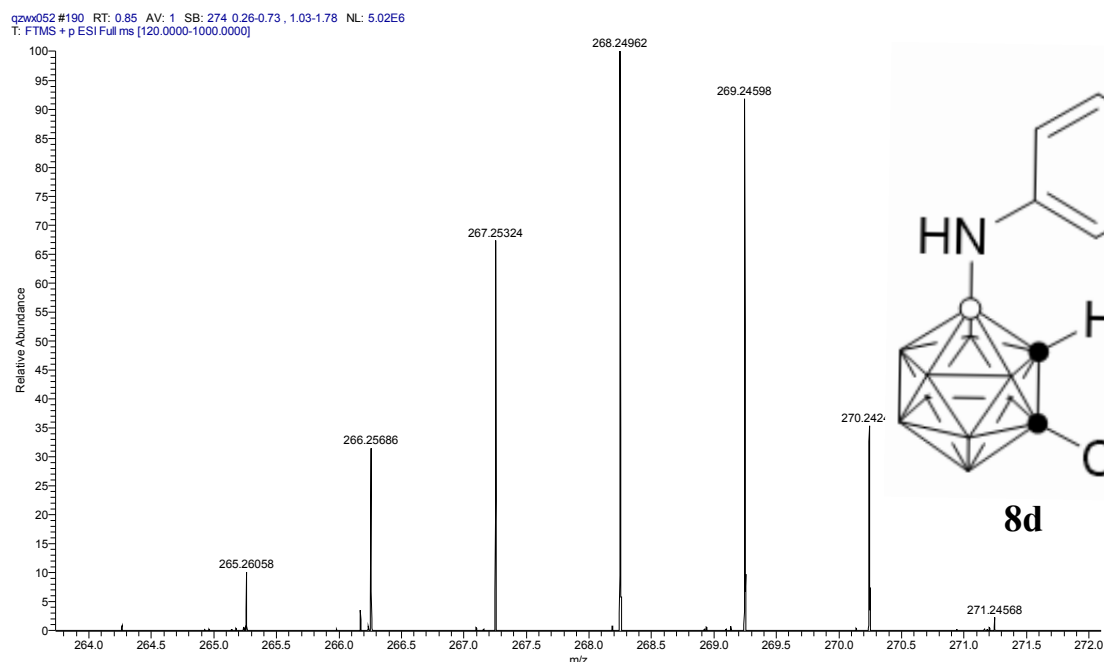



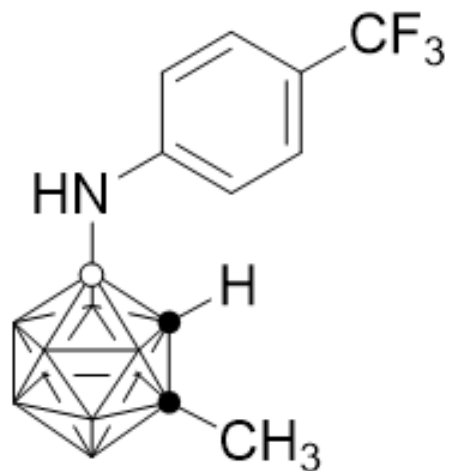

**9d**

<sup>1</sup>H NMR (400 MHz, CDCl<sub>3</sub>)

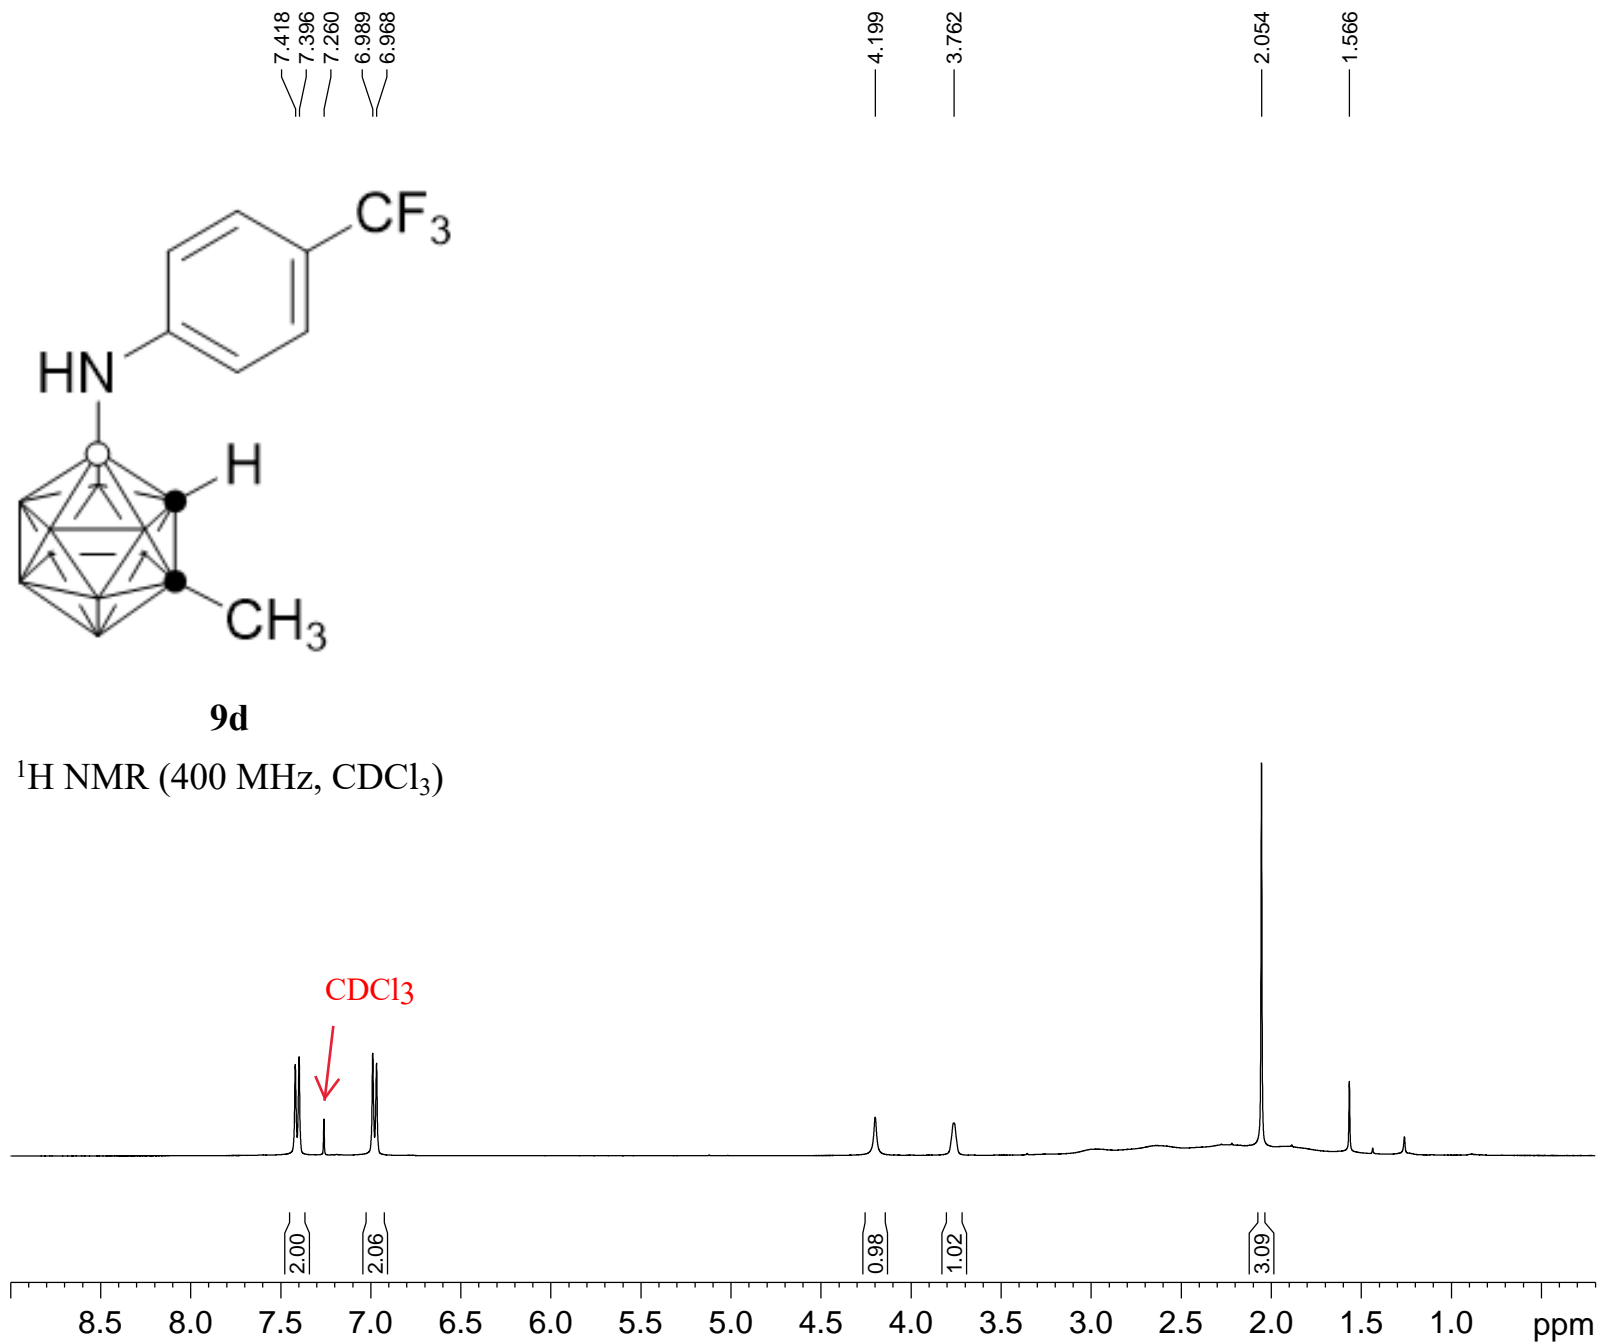

1hr-H-0517-phnh2CF3-

Current Data Parameters  
 NAME 1hr-H-0517-phnh2CF3-CDCl3  
 EXPNO 2  
 PROCNO 1

F2 - Acquisition Parameters

Date\_ 20161030  
 Time 14.08 h  
 INSTRUM spect  
 PROBHD Z108618\_0257 (  
 PULPROG zg30  
 TD 65536  
 SOLVENT CDCl3  
 NS 8  
 DS 2  
 SWH 8012.820 Hz  
 FIDRES 0.122266 Hz  
 AQ 4.0894465 sec  
 RG 90.5  
 DW 62.400 usec  
 DE 6.50 usec  
 TE 295.1 K  
 D1 1.00000000 sec  
 TD0 1  
 SFO1 400.2324714 MHz  
 NUC1 1H  
 P1 12.80 usec  
 PLW1 13.56000042 W

F2 - Processing parameters

SI 65536  
 SF 400.2300104 MHz  
 WDW EM  
 SSB 0  
 LB 0.30 Hz  
 GB 0  
 PC 1.00

1hr-C-0517-phnh2CF3

Current Data Parameters  
NAME 1hr-C-0517-phnh2CF3-CDCl3  
EXPNO 2  
PROCNO 1

F2 - Acquisition Parameters

Date\_ 20161030  
Time 19.45 h  
INSTRUM spect  
PROBHD Z108618\_0257 (   
PULPROG zgpg30  
TD 65536  
SOLVENT CDCl3  
NS 3439  
DS 4  
SWH 29761.904 Hz  
FIDRES 0.454131 Hz  
AQ 1.1010048 sec  
RG 161  
DW 16.800 usec  
DE 6.50 usec  
TE 294.8 K  
D1 2.00000000 sec  
D11 0.03000000 sec  
TD0 1  
SFO1 100.6479773 MHz  
NUC1 13C  
P1 9.50 usec  
PLW1 55.34000015 W  
SFO2 400.2316009 MHz  
NUC2 1H  
CPDPRG12 waltz16  
PCPD2 90.00 usec  
PLW2 13.56000042 W  
PLW12 0.27428001 W  
PLW13 0.13796000 W

F2 - Processing parameters  
SI 32768  
SF 100.6379016 MHz  
WDW EM  
SSB 0  
LB 1.00 Hz  
GB 0  
PC 1.40

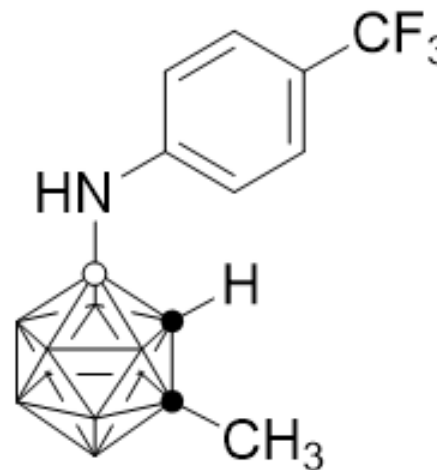

9d

$^{13}\text{C}\{^1\text{H}\}$  NMR (100 MHz,  $\text{CDCl}_3$ )

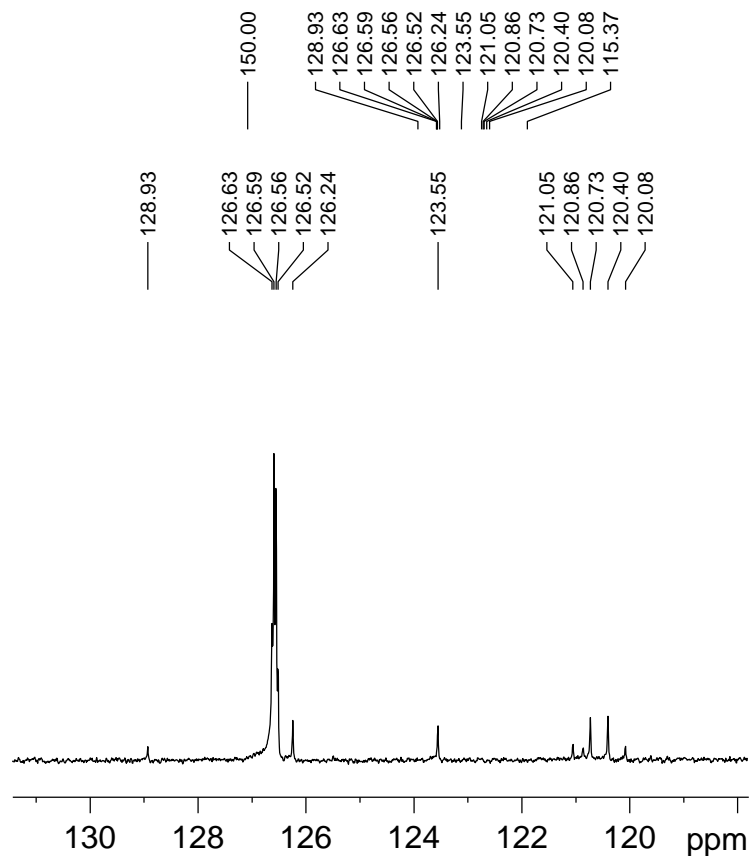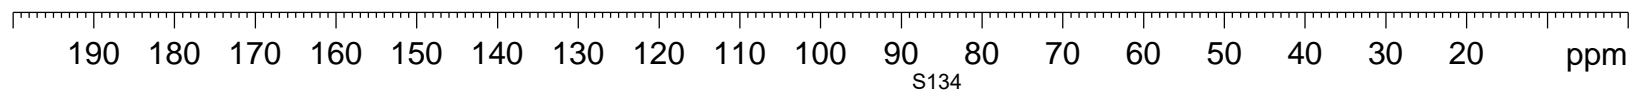

1hr-B-0517-phnh2CF3-CDCl3

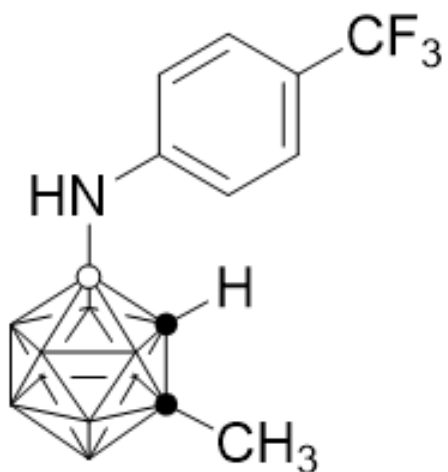

9d

<sup>11</sup>B{<sup>1</sup>H} NMR (128 MHz, CDCl<sub>3</sub>)

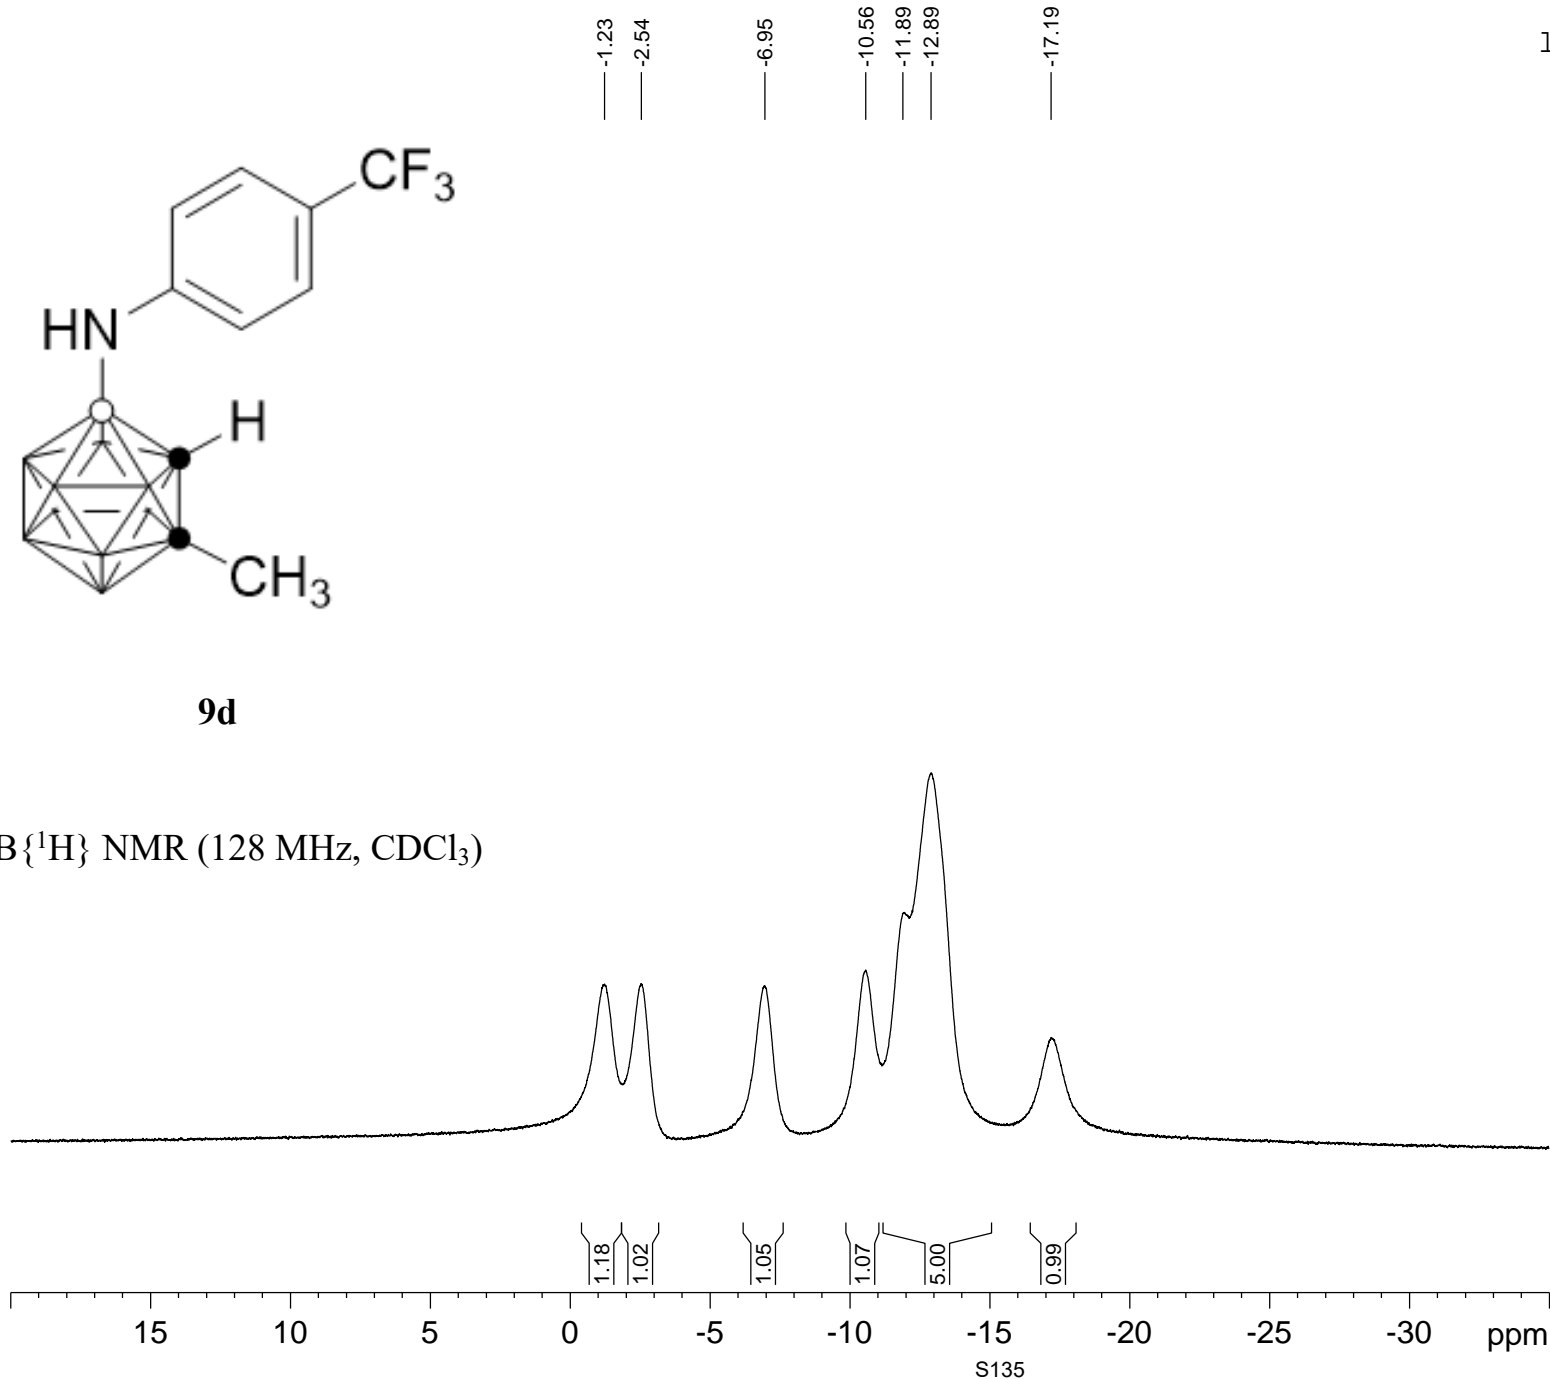

Current Data Parameters  
NAME 1hr-B-0517-phnh2CF3-CDCl3  
EXPNO 1  
PROCNO 1

F2 - Acquisition Parameters  
Date\_ 20161031  
Time 9.52 h  
INSTRUM spect  
PROBHD z108618\_0257 (  
PULPROG zgdc  
TD 65536  
SOLVENT C6D6  
NS 16  
DS 4  
SWH 24038.461 Hz  
FIDRES 0.366798 Hz  
AQ 1.3631488 sec  
RG 287  
DW 20.800 usec  
DE 6.50 usec  
TE 295.8 K  
D1 2.0000000 sec  
D11 0.0300000 sec  
TD0 1  
SFO1 128.4096890 MHz  
NUC1 11B  
P1 7.50 usec  
PLW1 55.09999847 W  
SFO2 400.2316009 MHz  
NUC2 1H  
CPDPRG[2] waltz16  
PCPD2 90.00 usec  
PLW2 13.56000042 W  
PLW12 0.27428001 W

F2 - Processing parameters  
SI 32768  
SF 128.4097615 MHz  
WDW EM  
SSB 0  
LB 1.00 Hz  
GB 0  
PC 1.40

lhr-B-0517-phnh2CF3-CDCl3(C)

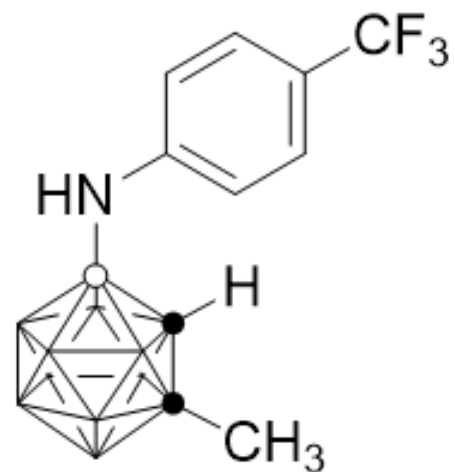

9d

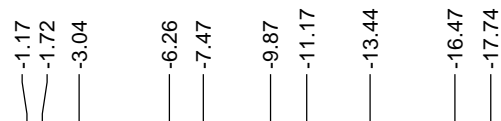

Current Data Parameters  
NAME lhr-B-0517-phnh2CF3-CDCl3(C)  
EXPNO 1  
PROCNO 1

F2 - Acquisition Parameters  
Date\_ 20161031  
Time 9.53 h  
INSTRUM spect  
PROBHD Z108618\_0257 ( )  
PULPROG zg  
TD 65536  
SOLVENT C6D6  
NS 12  
DS 2  
SWH 24038.461 Hz  
FIDRES 0.366798 Hz  
AQ 1.3631488 sec  
RG 287  
DW 20.800 usec  
DE 6.50 usec  
TE 295.3 K  
D1 2.00000000 sec  
TD0 1  
SFO1 128.4096890 MHz  
NUC1 11B  
P1 7.50 usec  
PLW1 55.09999847 W

F2 - Processing parameters  
SI 32768  
SF 128.4097504 MHz  
WDW EM  
SSB 0  
LB 1.00 Hz  
GB 0  
PC 1.40

<sup>11</sup>B NMR (128 MHz, CDCl<sub>3</sub>)

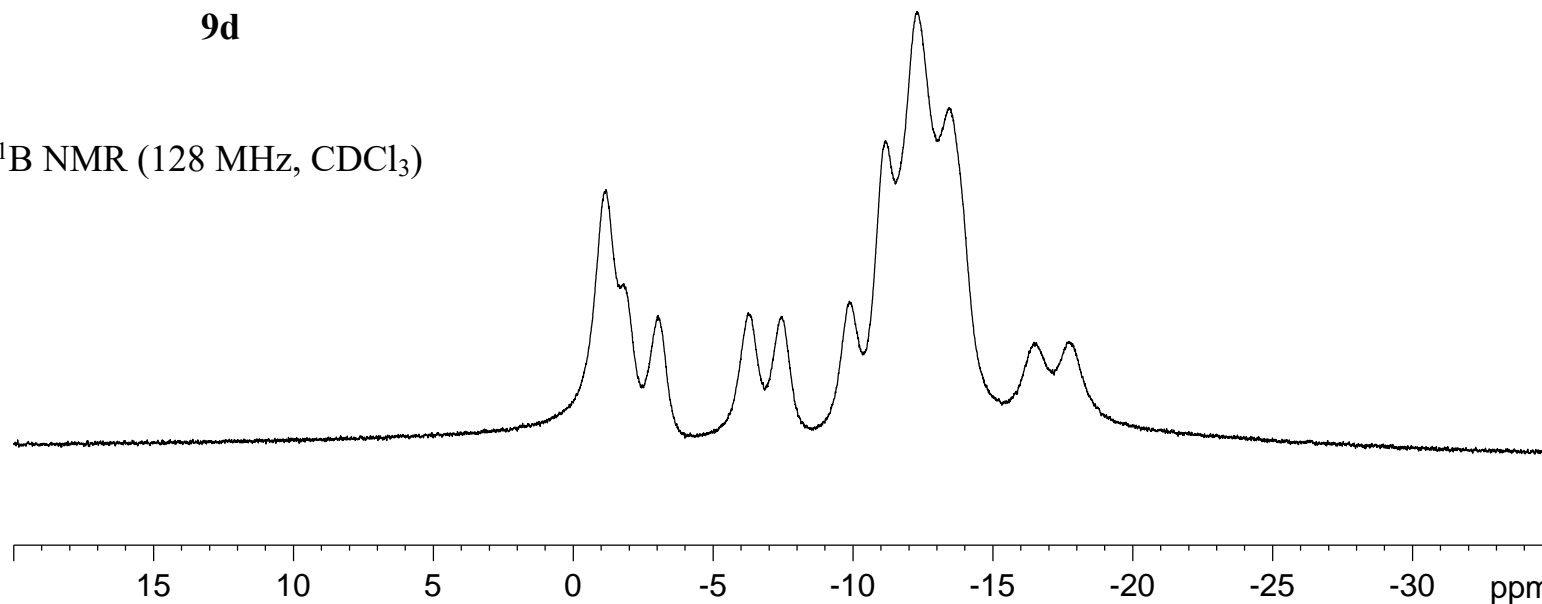

— -60.95

lhr-F-0517-phnh2CF3-(

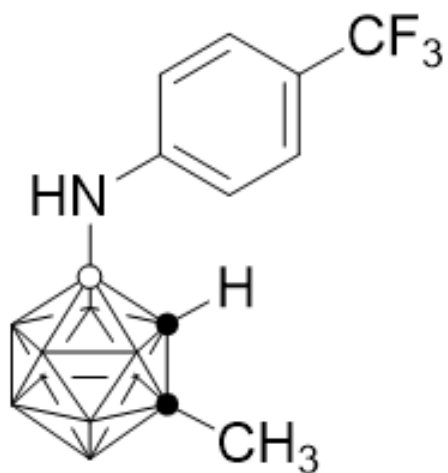

9d

$^{19}\text{F}\{^1\text{H}\}$  NMR (376 MHz,  $\text{CDCl}_3$ )

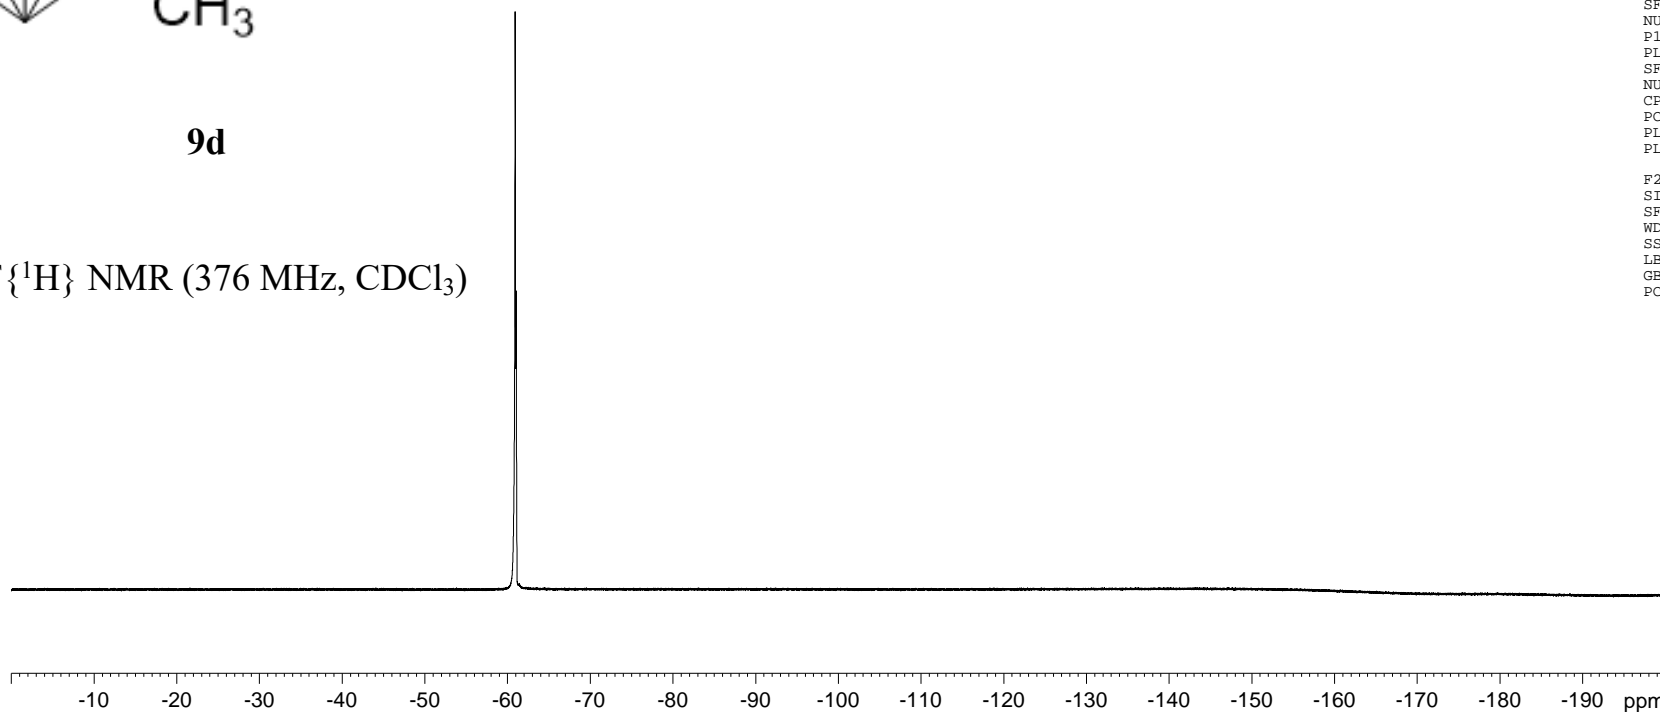

Current Data Parameters  
NAME lhr-F-0517-phnh2CF3-CDC13  
EXPNO 1  
PROCNO 1

F2 - Acquisition Parameters  
Date\_ 20161031  
Time 9.56 h  
INSTRUM spect  
PROBHD Z108618\_0257 (  
PULPROG zgfhigqn.2  
TD 131072  
SOLVENT C6D6  
NS 21  
DS 4  
SWH 89285.711 Hz  
FIDRES 0.681196 Hz  
AQ 0.7340032 sec  
RG 645  
DW 5.600 usec  
DE 6.50 usec  
TE 295.3 K  
D1 1.0000000 sec  
D11 0.0300000 sec  
D12 0.0000200 sec  
TD0 1  
SFO1 376.5548010 MHz  
NUC1 19F  
P1 14.70 usec  
PLW1 18.3600061 W  
SFO2 400.2316009 MHz  
NUC2 1H  
CPDPRG[2] waltz16  
PCPD2 90.00 usec  
PLW2 13.5600042 W  
PLW12 0.27428001 W

F2 - Processing parameters  
SI 65536  
SF 376.5924602 MHz  
WDW EM  
SSB 0  
LB 0.30 Hz  
GB 0  
PC 1.00

lhr-F-0517-phnh2CF3-(

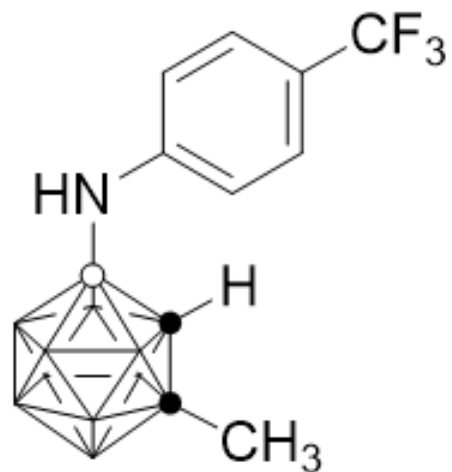

9d

— -60.94

$^{19}\text{F}$  NMR (376 MHz,  $\text{CDCl}_3$ )

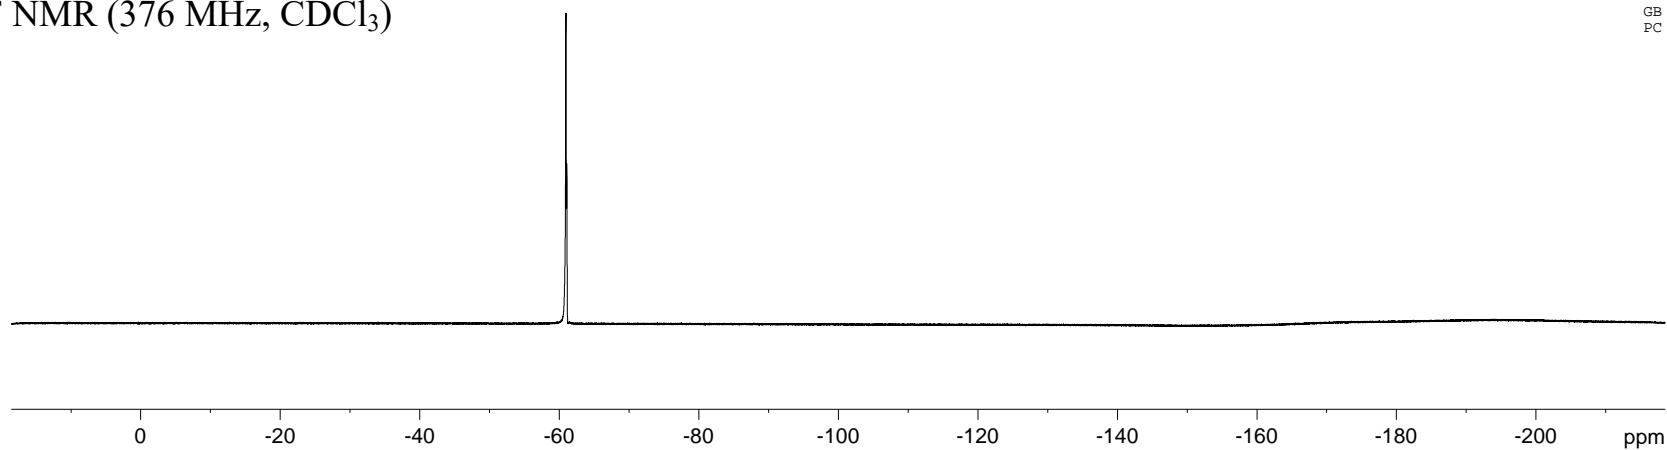

Current Data Parameters  
NAME lhr-F-0517-phnh2CF3-CDCl3(C)  
EXPNO 1  
PROCNO 1

F2 - Acquisition Parameters  
Date\_ 20161031  
Time 9.57 h  
INSTRUM spect  
PROBHD Z108618\_0257 (  
PULPROG zgfhigqn.2  
TD 131072  
SOLVENT C6D6  
NS 10  
DS 4  
SWH 89285.711 Hz  
FIDRES 0.681196 Hz  
AQ 0.7340032 sec  
RG 645  
DW 5.600 usec  
DE 6.50 usec  
TE 295.3 K  
D1 1.0000000 sec  
D11 0.0300000 sec  
D12 0.0000200 sec  
TD0 1  
SFO1 376.5548010 MHz  
NUC1 19F  
P1 14.70 usec  
PLW1 18.3600061 W  
SFO2 400.2316009 MHz  
NUC2 1H  
CPDPRG[2] waltz16  
PCPD2 90.00 usec  
PLW2 13.5600042 W  
PLW12 0.27428001 W

F2 - Processing parameters  
SI 65536  
SF 376.5924602 MHz  
WDW EM  
SSB 0  
LB 0.30 Hz  
GB 0  
PC 1.00

# Thermo QEFMS Analysis Report

## Analysis Info

|               |                                        |                |          |
|---------------|----------------------------------------|----------------|----------|
| Sample Name : | Lhr-517                                | Reference No.: | Qzwx053  |
| Instrument :  | Q Exactive Focus Orbitrap              |                |          |
| Source :      | HESI II                                | Polarity :     | Positive |
| Comment :     | ESI pos, 3.5kV, by LC, with sheath gas |                |          |

## Accurate Mass Measurement

|                                        |                                                                  |
|----------------------------------------|------------------------------------------------------------------|
| Molecular formula :                    | C <sub>10</sub> H <sub>18</sub> B <sub>10</sub> F <sub>3</sub> N |
| Experimental Mass [M-F] <sup>+</sup> : | 298.23999                                                        |
| Theoretical Mass [M-F] <sup>+</sup> :  | 298.24050                                                        |
| Error (ppm) :                          | 1.7                                                              |

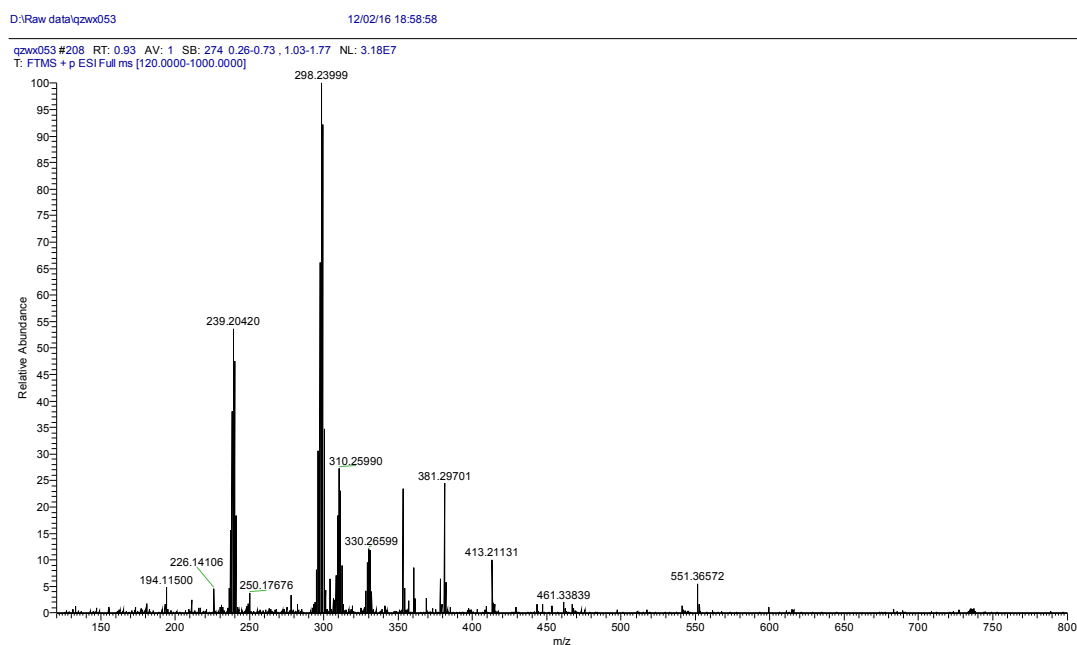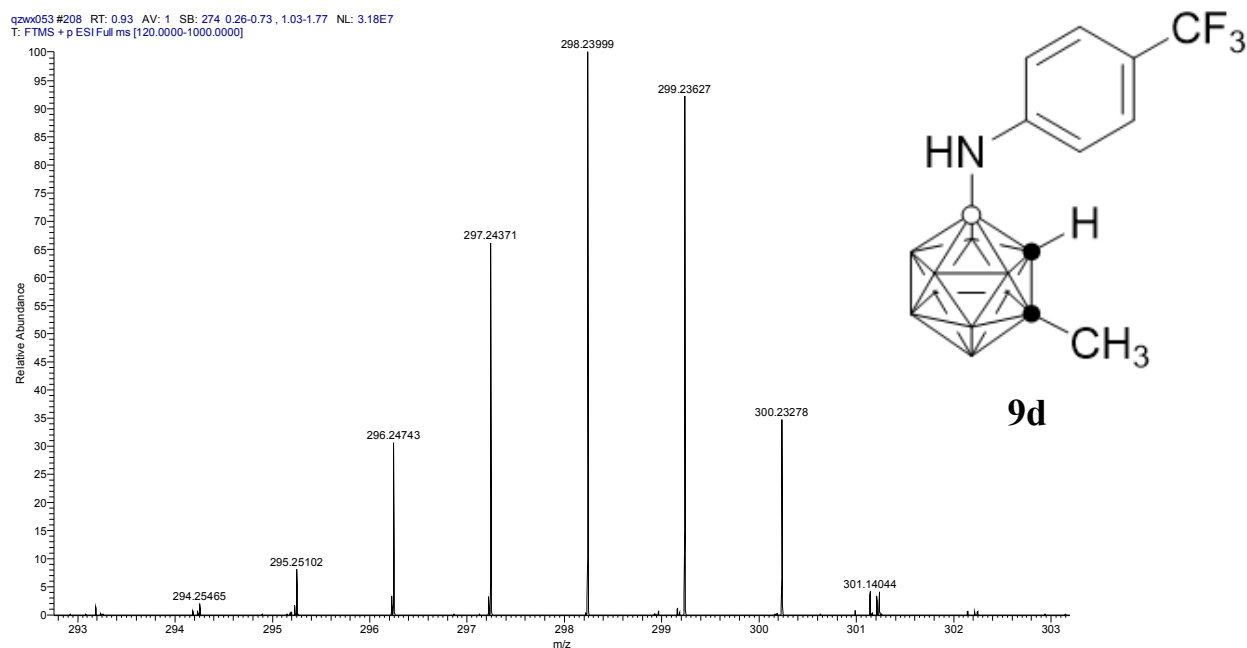

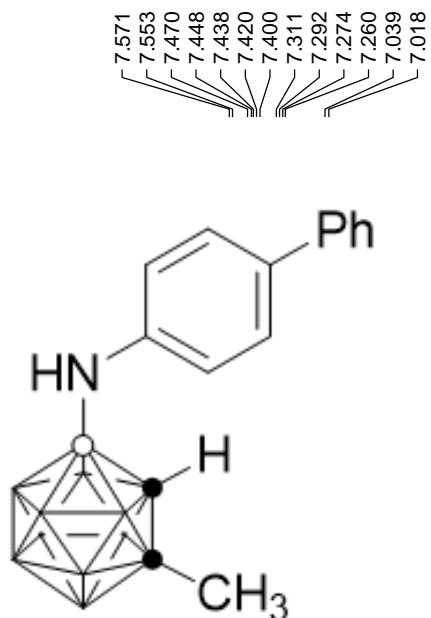

**10d**

<sup>1</sup>H NMR (400 MHz, CDCl<sub>3</sub>)

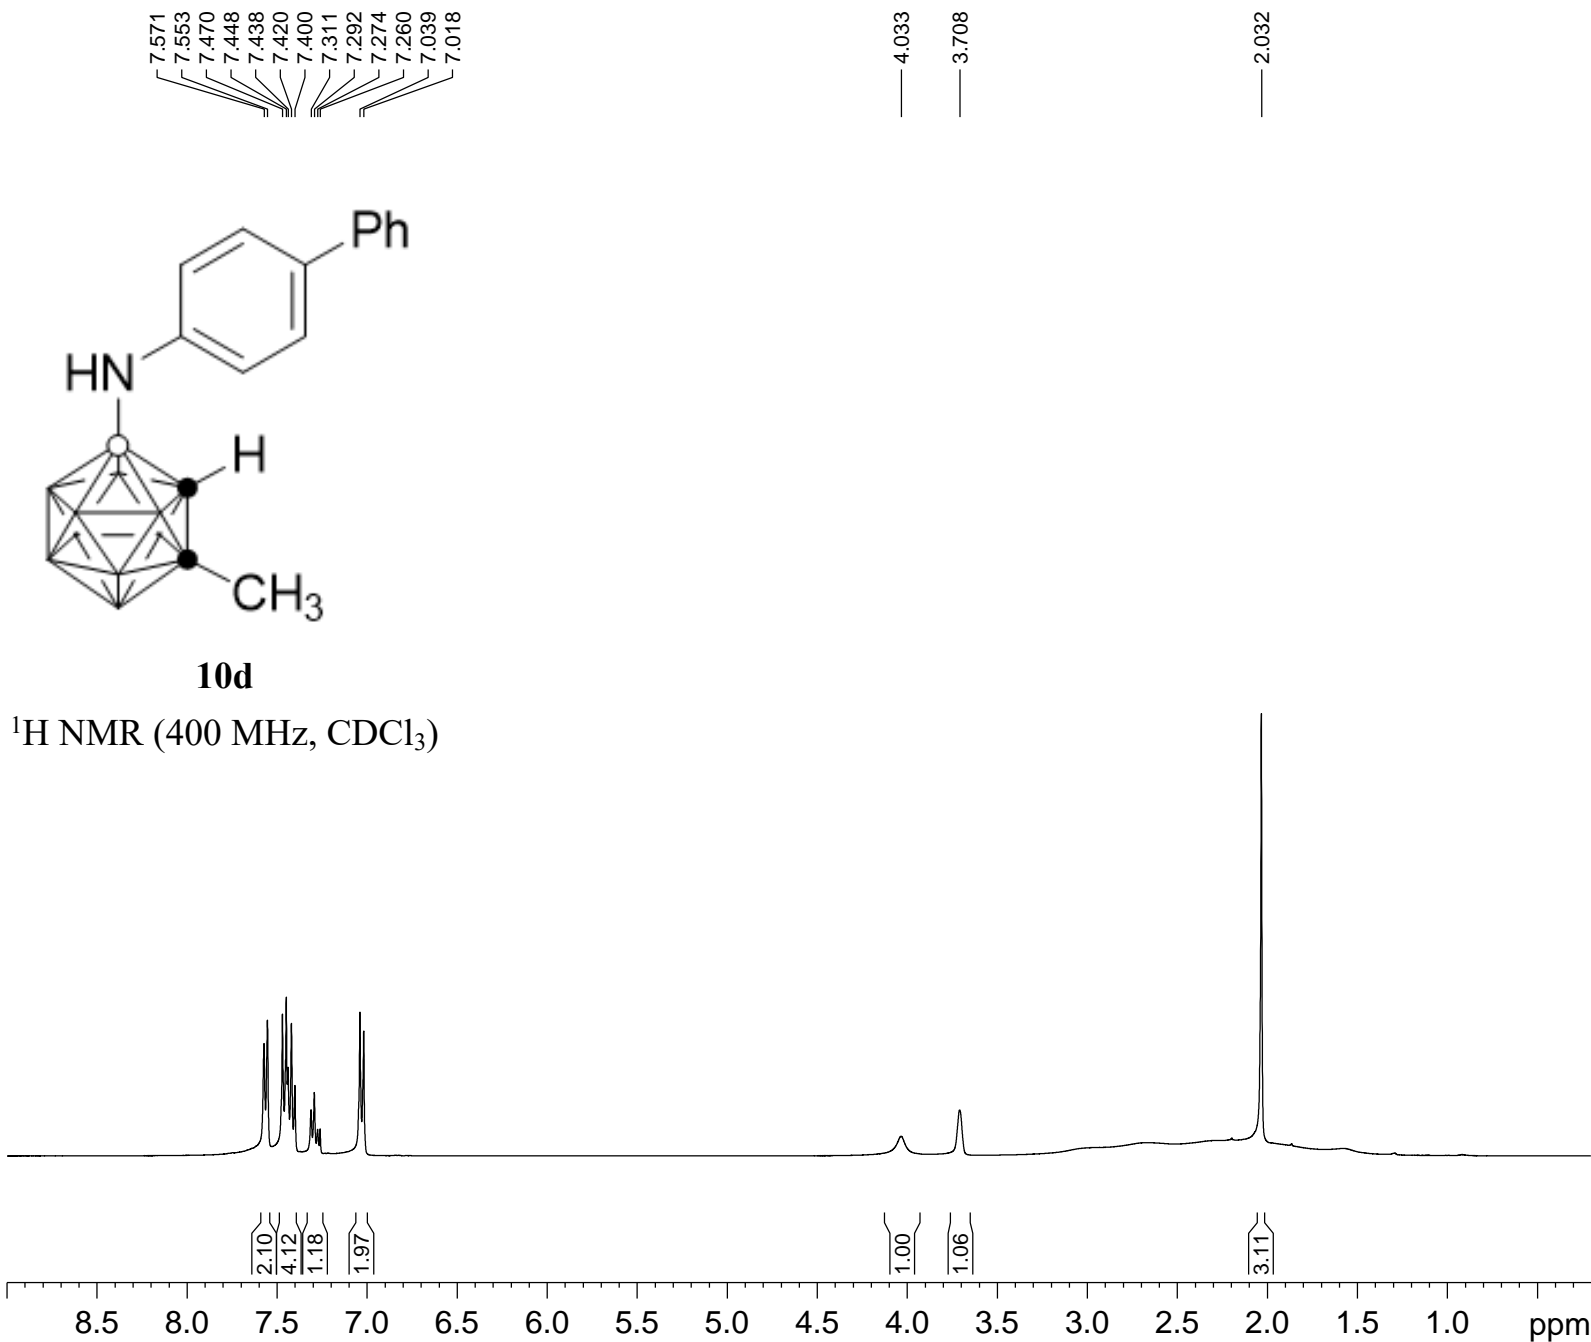

lhr-H-0526-phnhPH-CD

Current Data Parameters  
 NAME lhr-H-0526-phnhPH-CD  
 EXPNO 1  
 PROCNO 1

F2 - Acquisition Parameters  
 Date\_ 20161104  
 Time 12.40 h  
 INSTRUM spect  
 PROBHD Z108618\_0257 (zg30)  
 PULPROG zg30  
 TD 65536  
 SOLVENT CDCl3  
 NS 9  
 DS 2  
 SWH 8012.820 Hz  
 FIDRES 0.122266 Hz  
 AQ 4.0894465 sec  
 RG 57  
 DW 62.400 usec  
 DE 6.50 usec  
 TE 296.0 K  
 D1 1.00000000 sec  
 TD0 1  
 SFO1 400.2324714 MHz  
 NUC1 1H  
 P1 12.80 usec  
 PLW1 13.56000042 W

F2 - Processing parameters  
 SI 65536  
 SF 400.2300098 MHz  
 WDW EM  
 SSB 0  
 LB 0.30 Hz  
 GB 0  
 PC 1.00



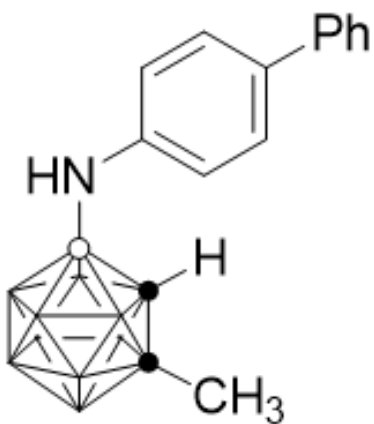

10d

$^{13}\text{C}\{^1\text{H}\}$  NMR (100 MHz,  $\text{CDCl}_3$ )

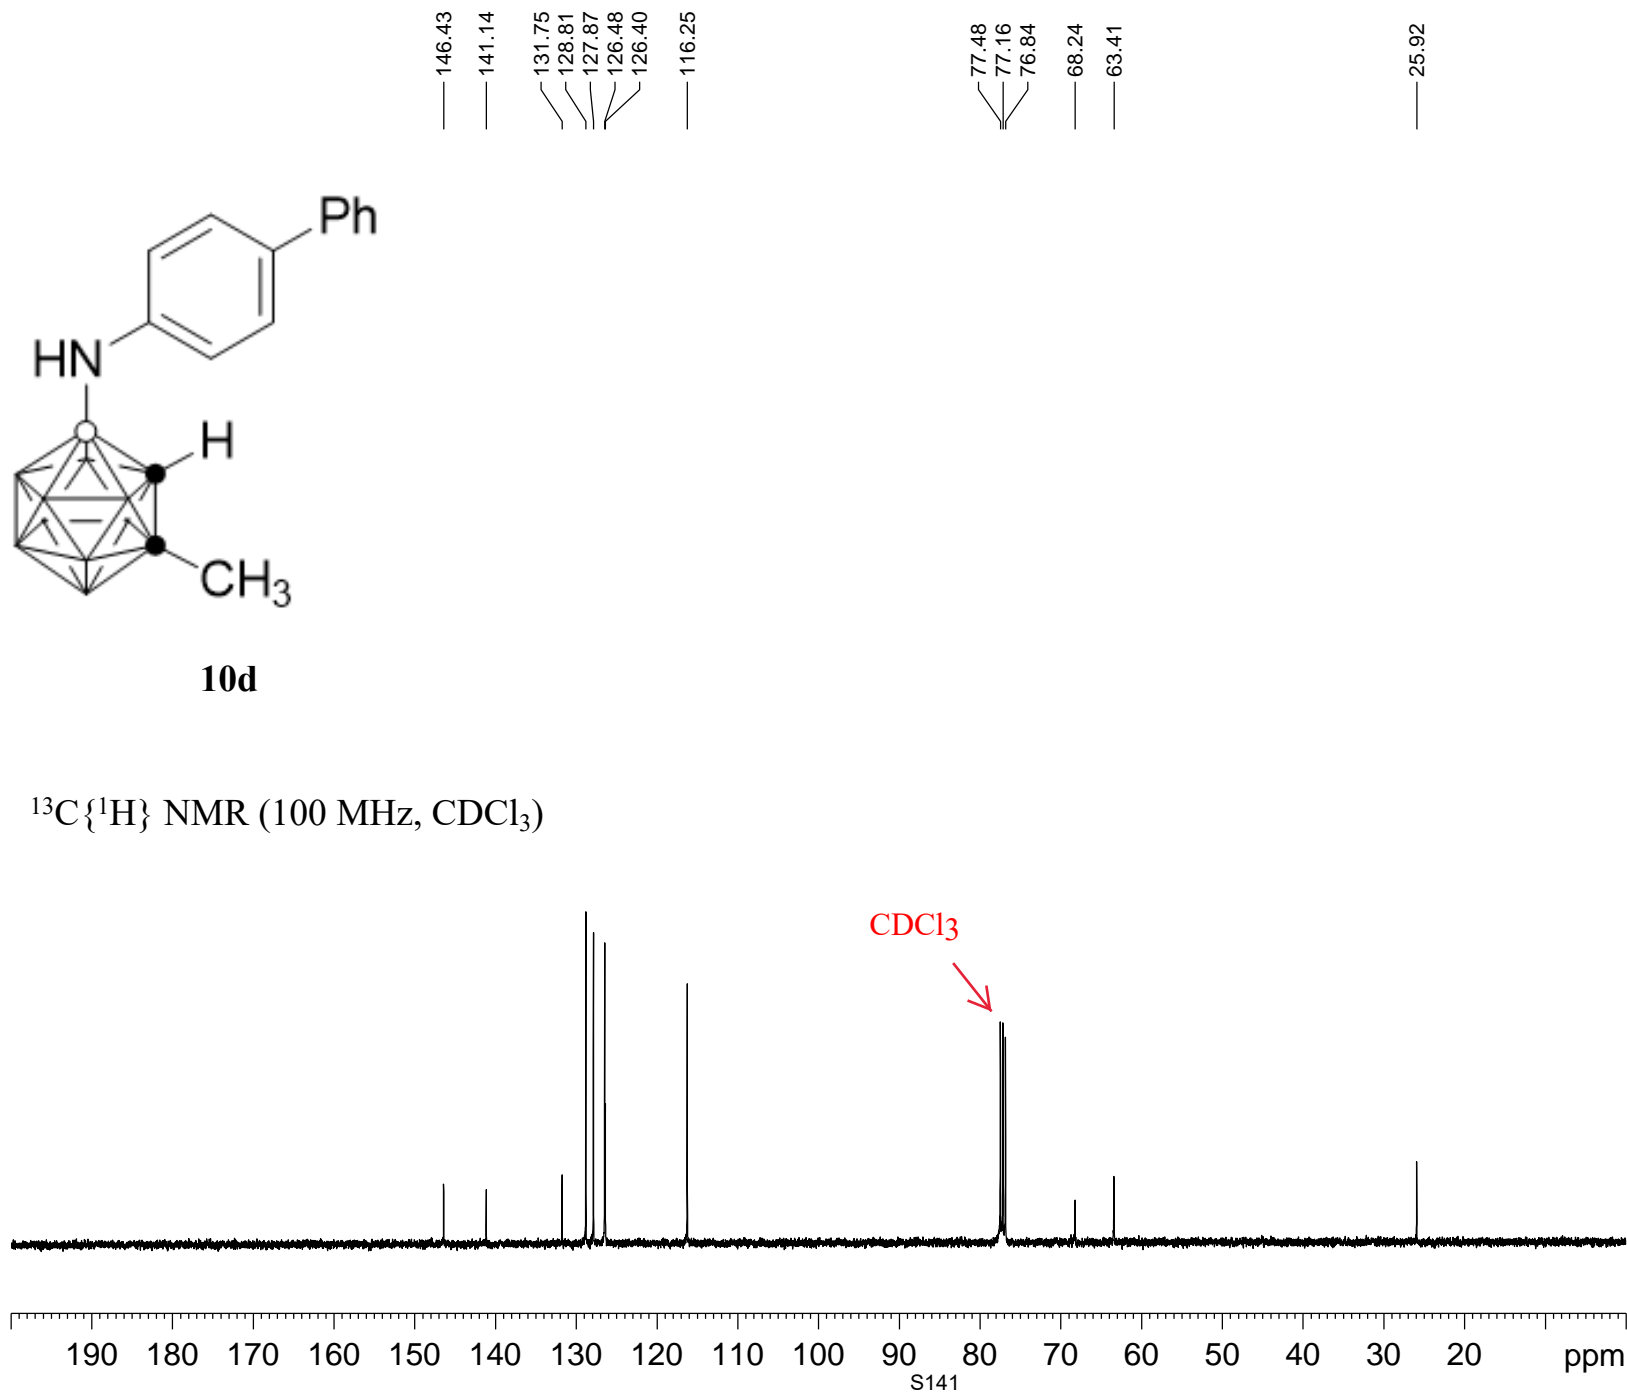

1hr-C-0526-phnhPH-(

Current Data Parameters  
 NAME 1hr-C-0526-phnhPH-CDC1  
 EXPNO 1  
 PROCNO 1

F2 - Acquisition Parameters

Date\_ 20161104  
 Time 12.44 h  
 INSTRUM spect  
 PROBHD Z108618\_0257 (  
 PULPROG zgpg30  
 TD 65536  
 SOLVENT CDC13  
 NS 100  
 DS 4  
 SWH 29761.904 Hz  
 FIDRES 0.454131 Hz  
 AQ 1.1010048 sec  
 RG 161  
 DW 16.800 usec  
 DE 6.50 usec  
 TE 296.6 K  
 D1 2.00000000 sec  
 D11 0.03000000 sec  
 TD0 1  
 SFO1 100.6479773 MHz  
 NUC1 13C  
 P1 9.50 usec  
 PLW1 55.34000015 W  
 SFO2 400.2316009 MHz  
 NUC2 1H  
 CPDPRG[2] waltz16  
 PCPD2 90.00 usec  
 PLW2 13.56000042 W  
 PLW12 0.27428001 W  
 PLW13 0.13796000 W

F2 - Processing parameters

SI 32768  
 SF 100.6379063 MHz  
 WDW EM  
 SSB 0  
 LB 1.00 Hz  
 GB 0  
 PC 1.40

1hr-B-0526-phnhPH-CDCl3

Current Data Parameters  
NAME 1hr-B-0526-phnhPH-CDCl3  
EXPNO 1  
PROCNO 1

F2 - Acquisition Parameters

Date\_ 20161104  
Time 12.49 h  
INSTRUM spect  
PROBHD Z108618\_0257 (  
PULPROG zgdc  
TD 65536  
SOLVENT CDCl3  
NS 16  
DS 4  
SWH 24038.461 Hz  
FIDRES 0.366798 Hz  
AQ 1.3631488 sec  
RG 203  
DW 20.800 usec  
DE 6.50 usec  
TE 296.6 K  
D1 2.0000000 sec  
D11 0.0300000 sec  
TD0 1  
SFO1 128.4096890 MHz  
NUC1 11B  
P1 7.50 usec  
PLW1 55.09999847 W  
SFO2 400.2316009 MHz  
NUC2 1H  
CPDPRG[2] waltz16  
PCPD2 90.00 usec  
PLW2 13.56000042 W  
PLW12 0.27428001 W

F2 - Processing parameters

SI 32768  
SF 128.4097615 MHz  
WDW EM  
SSB 0  
LB 1.00 Hz  
GB 0  
PC 1.40

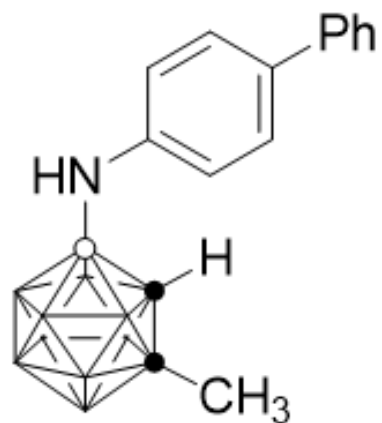

10d

$^{11}\text{B}\{^1\text{H}\}$  NMR (128 MHz,  $\text{CDCl}_3$ )

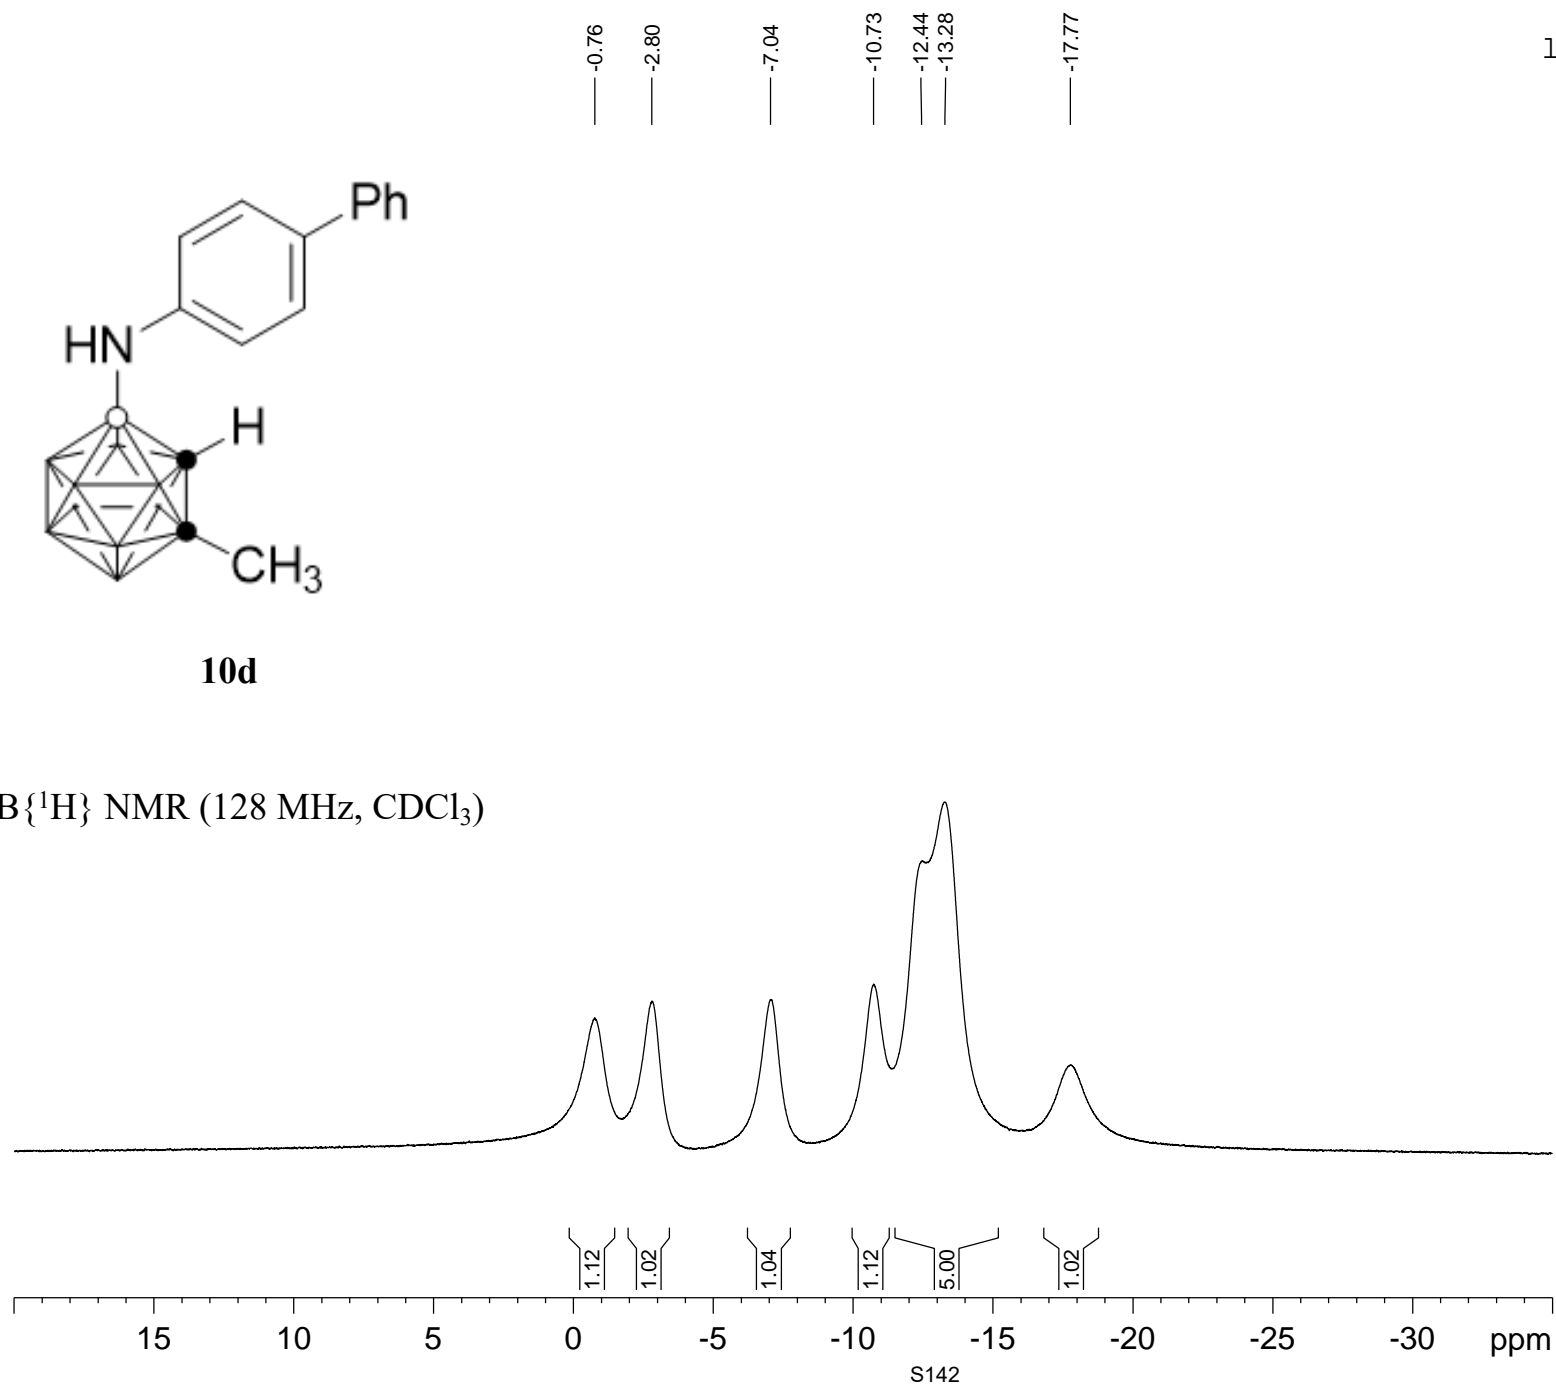

S142

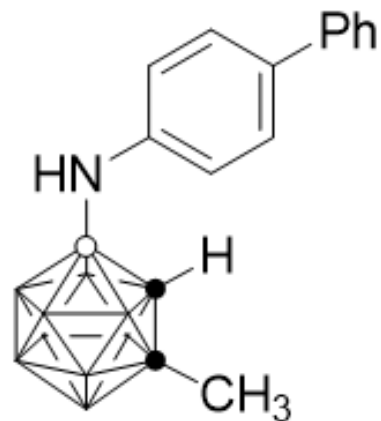

10d

$^{11}\text{B}$  NMR (128 MHz,  $\text{CDCl}_3$ )

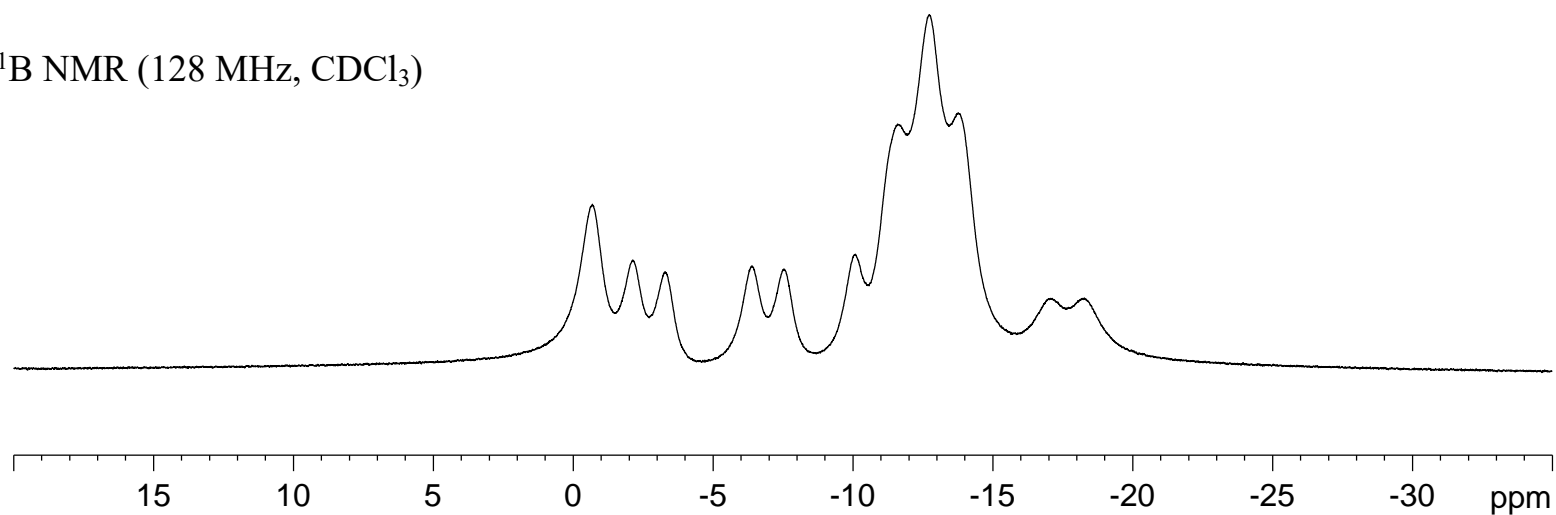

| -0.69  
 | -2.13  
 | -3.28  
  
 | -6.40  
 | -7.55  
  
 | -10.09  
 | -11.60  
 | -12.73  
 | -13.77  
  
 | -17.12  
 | -18.27

1hr-B-0526-phnhPH- $\text{CDCl}_3$ (C)

Current Data Parameters  
 NAME 1hr-B-0526-phnhPH- $\text{CDCl}_3$ (C)  
 EXPNO 1  
 PROCNO 1

F2 - Acquisition Parameters  
 Date\_ 20161104  
 Time 12.51 h  
 INSTRUM spect  
 PROBHD Z108618\_0257 (  
 PULPROG zg  
 TD 65536  
 SOLVENT  $\text{CDCl}_3$   
 NS 18  
 DS 2  
 SWH 24038.461 Hz  
 FIDRES 0.366798 Hz  
 AQ 1.3631488 sec  
 RG 203  
 DW 20.800 usec  
 DE 6.50 usec  
 TE 296.3 K  
 D1 2.0000000 sec  
 TD0 1  
 SFO1 128.4096890 MHz  
 NUC1  $^{11}\text{B}$   
 P1 7.50 usec  
 PLW1 55.09999847 W

F2 - Processing parameters  
 SI 32768  
 SF 128.4097504 MHz  
 WDW EM  
 SSB 0  
 LB 1.00 Hz  
 GB 0  
 PC 1.40

# Thermo QEFMS Analysis Report

## Analysis Info

|               |                                        |                |          |
|---------------|----------------------------------------|----------------|----------|
| Sample Name : | Lhr-526                                | Reference No.: | Qzwx055  |
| Instrument :  | Q Exactive Focus Orbitrap              |                |          |
| Source :      | HESI II                                | Polarity :     | Positive |
| Comment :     | ESI pos, 3.5kV, by LC, with sheath gas |                |          |

## Accurate Mass Measurement

|                                        |                                                   |
|----------------------------------------|---------------------------------------------------|
| Molecular formula :                    | C <sub>15</sub> H <sub>23</sub> B <sub>10</sub> N |
| Experimental Mass [M+H] <sup>+</sup> : | 326.29015                                         |
| Theoretical Mass [M+H] <sup>+</sup> :  | 326.29065                                         |
| Error (ppm) :                          | 1.5                                               |

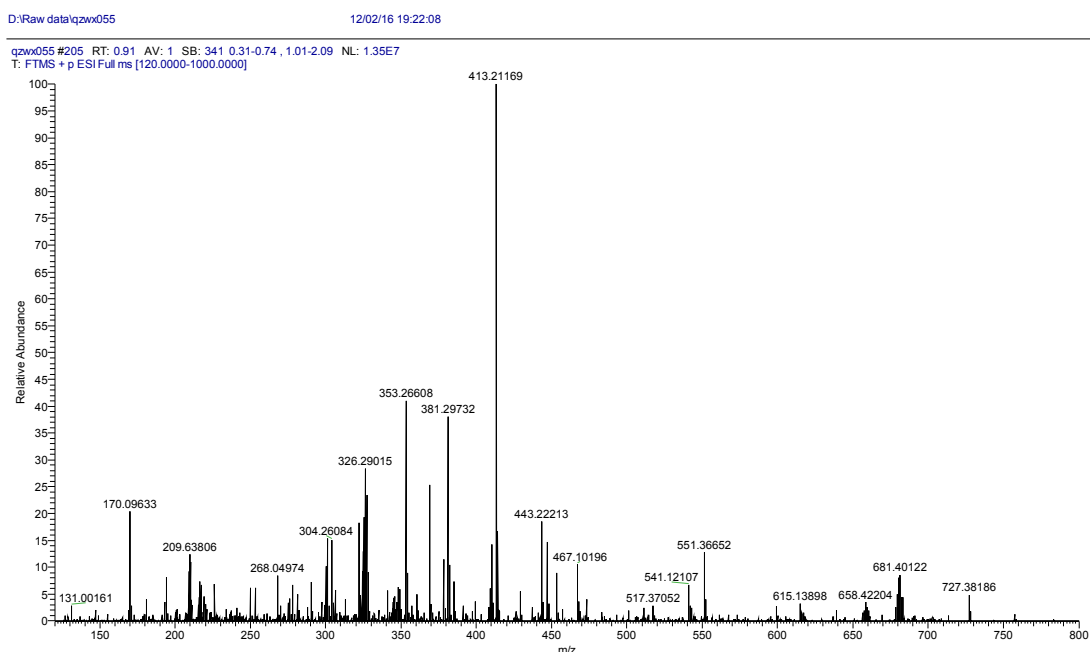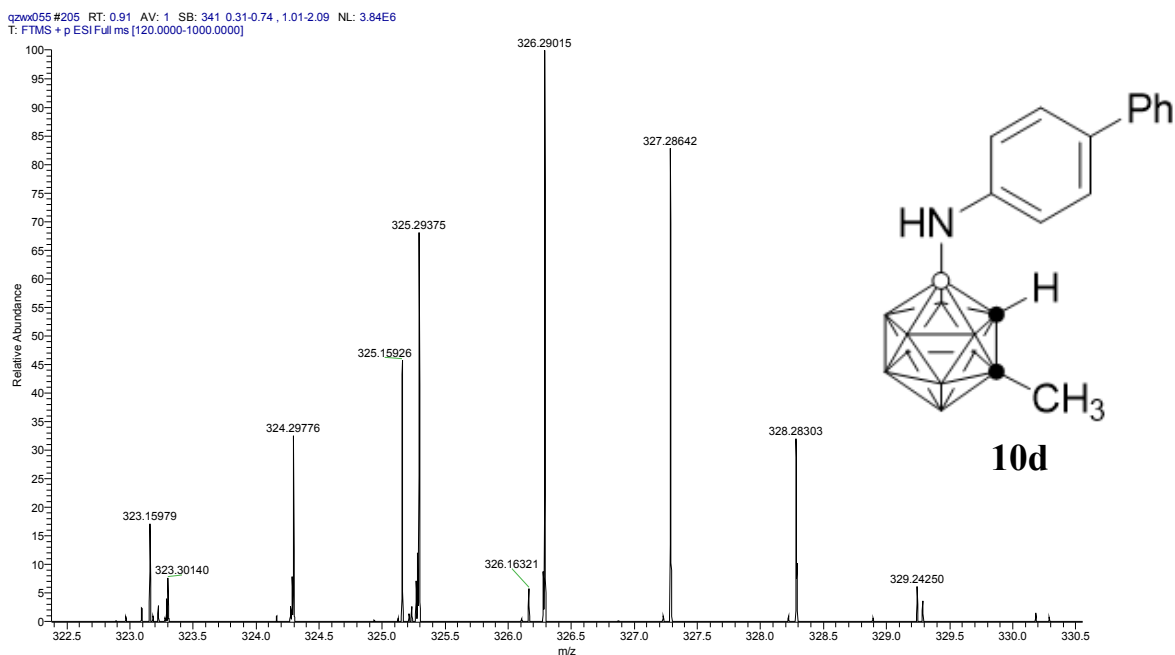

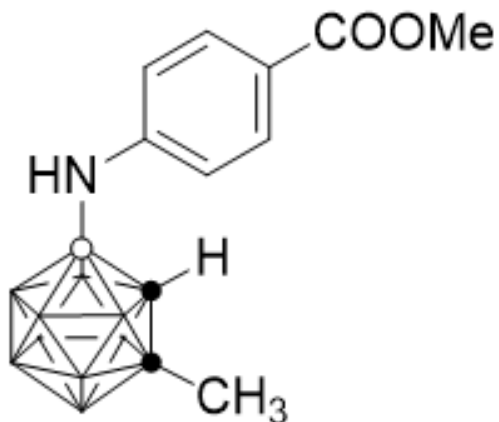

**11d**

<sup>1</sup>H NMR (400 MHz, CDCl<sub>3</sub>)

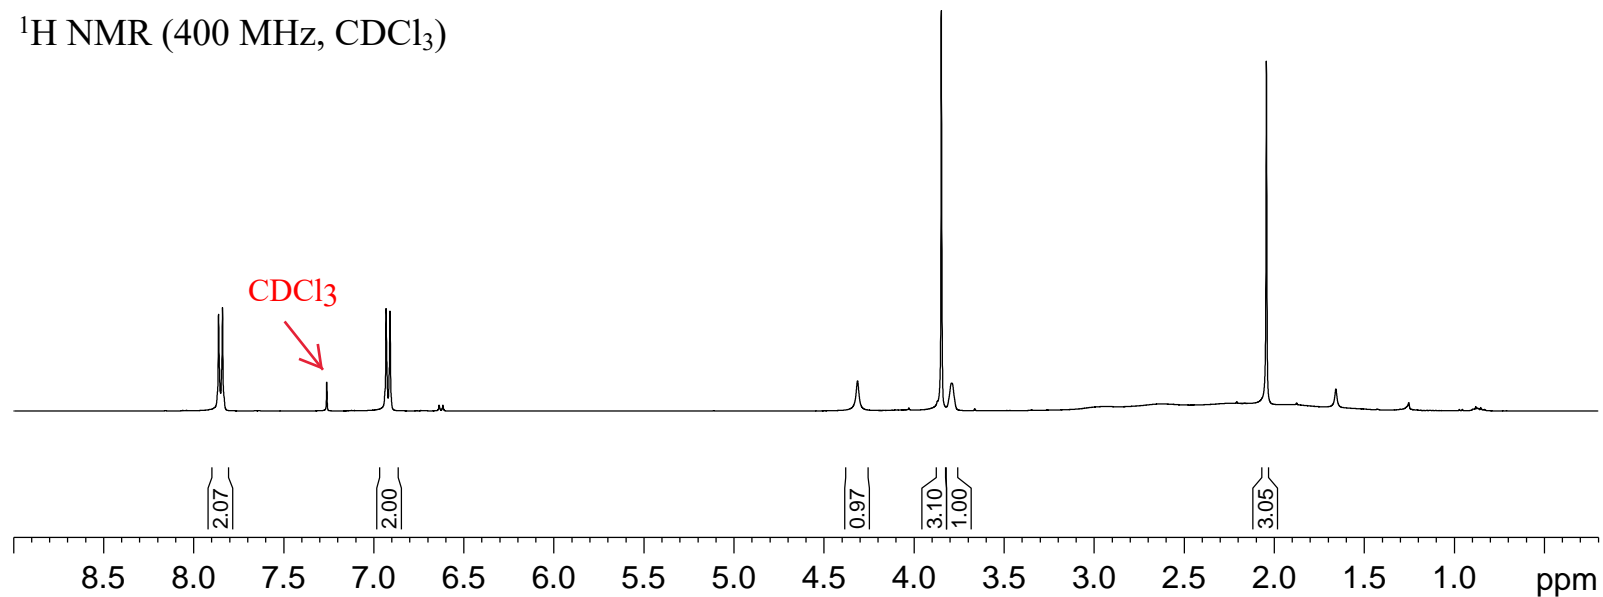

7.860  
7.839

7.260

6.932  
6.910

4.314

3.849  
3.792

2.044

lhr-H-0519-phnhcoome

Current Data Parameters  
 NAME lhr-H-0519-phnhcoome-CDCl3  
 EXPNO 1  
 PROCNO 1

F2 - Acquisition Parameters

Date\_ 20161030  
 Time 14.13 h  
 INSTRUM spect  
 PROBHD Z108618\_0257 (  
 PULPROG zg30  
 TD 65536  
 SOLVENT CDCl3  
 NS 8  
 DS 2  
 SWH 8012.820 Hz  
 FIDRES 0.122266 Hz  
 AQ 4.0894465 sec  
 RG 50.8  
 DW 62.400 usec  
 DE 6.50 usec  
 TE 295.1 K  
 D1 1.00000000 sec  
 TD0 1  
 SFO1 400.2324714 MHz  
 NUC1 1H  
 P1 12.80 usec  
 PLW1 13.56000042 W

F2 - Processing parameters

SI 65536  
 SF 400.2300108 MHz  
 WDW EM  
 SSB 0  
 LB 0.30 Hz  
 GB 0  
 PC 1.00

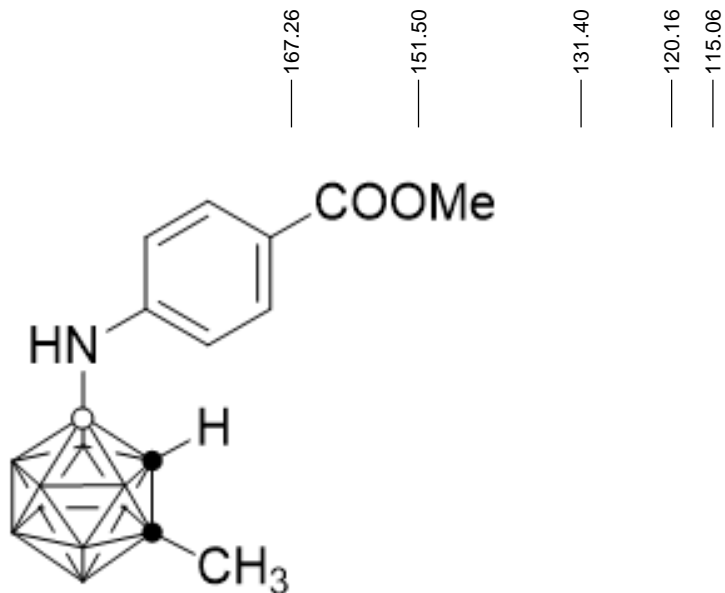

11d

$^{13}\text{C}\{^1\text{H}\}$  NMR (100 MHz,  $\text{CDCl}_3$ )

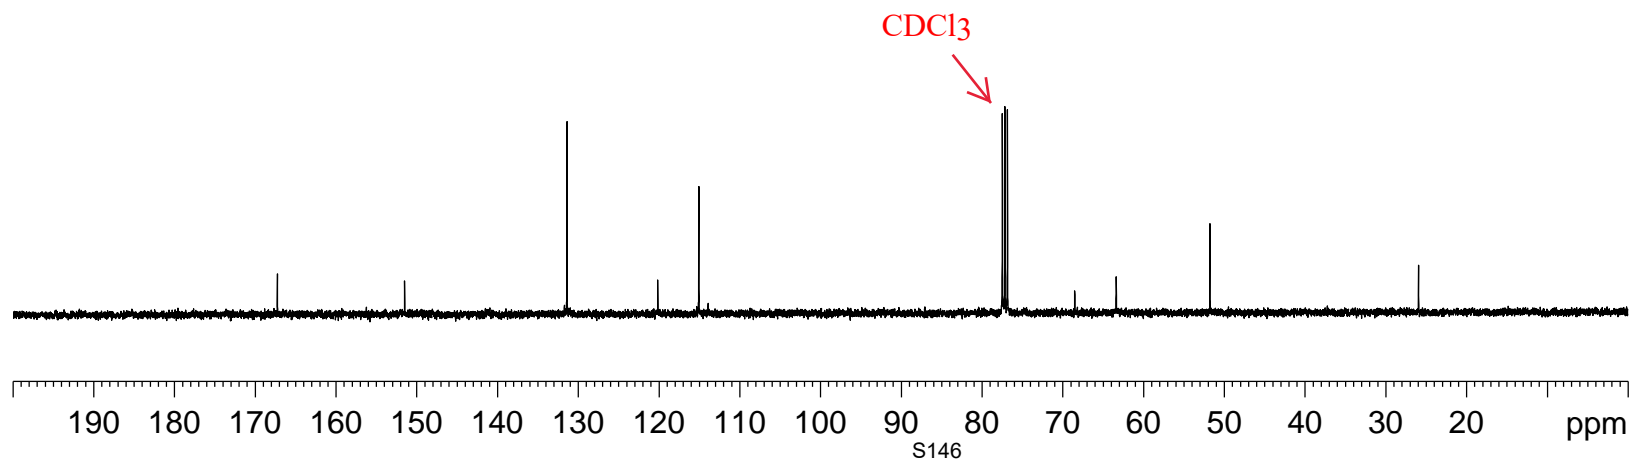

lhr-C-0519-phnhcoor

Current Data Parameters  
 NAME lhr-C-0519-phnhcoome-CDCl3  
 EXPNO 1  
 PROCNO 1

F2 - Acquisition Parameters  
 Date\_ 20161030  
 Time 19.38 h  
 INSTRUM spect  
 PROBHD z108618\_0257 (55538)  
 PULPROG zgpg30  
 TD 65536  
 SOLVENT CDCl3  
 NS 52  
 DS 4  
 SWH 29761.904 Hz  
 FIDRES 0.454131 Hz  
 AQ 1.1010048 sec  
 RG 161  
 DW 16.800 usec  
 DE 6.50 usec  
 TE 295.2 K  
 D1 2.00000000 sec  
 D11 0.03000000 sec  
 TD0 1  
 SF01 100.6479773 MHz  
 NUC1 13C  
 P1 9.50 usec  
 PLW1 55.34000015 W  
 SFO2 400.2316009 MHz  
 NUC2 1H  
 CPDPRG[2] waltz16  
 PCPD2 90.00 usec  
 PLW2 13.56000042 W  
 PLW12 0.27428001 W  
 PLW13 0.13796000 W

F2 - Processing parameters  
 SI 32768  
 SF 100.6379038 MHz  
 WDW EM  
 SSB 0  
 LB 1.00 Hz  
 GB 0  
 PC 1.40

1hr-B-0519-phnhcoome-CDCl3

Current Data Parameters  
NAME 1hr-B-0519-phnhcoome-CDCl3  
EXPNO 1  
PROCNO 1

F2 - Acquisition Parameters  
Date\_ 20161031  
Time 9.49 h  
INSTRUM spect  
PROBHD Z108618\_0257 (  
PULPROG zgdc  
TD 65536  
SOLVENT C6D6  
NS 9  
DS 4  
SWH 24038.461 Hz  
FIDRES 0.366798 Hz  
AQ 1.3631488 sec  
RG 287  
DW 20.800 usec  
DE 6.50 usec  
TE 295.9 K  
D1 2.0000000 sec  
D11 0.0300000 sec  
TD0 1  
SFO1 128.4096890 MHz  
NUC1 11B  
P1 7.50 usec  
PLW1 55.09999847 W  
SFO2 400.2316009 MHz  
NUC2 1H  
CPDPRG[2] waltz16  
PCPD2 90.00 usec  
PLW2 13.56000042 W  
PLW12 0.27428001 W

F2 - Processing parameters  
SI 32768  
SF 128.4097615 MHz  
WDW EM  
SSB 0  
LB 1.00 Hz  
GB 0  
PC 1.40

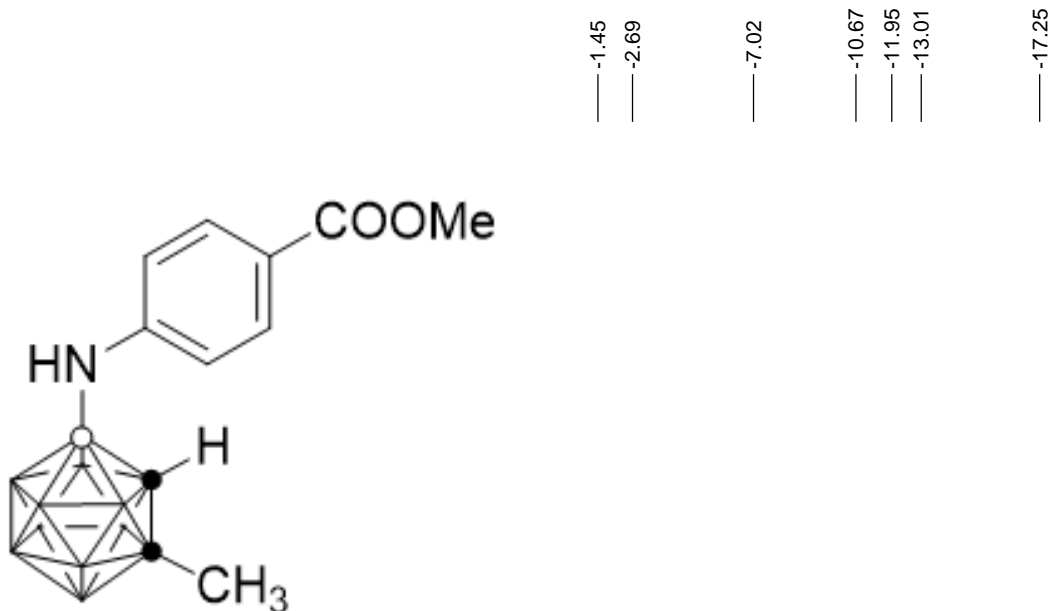

11d

<sup>11</sup>B{<sup>1</sup>H} NMR (128 MHz, CDCl<sub>3</sub>)

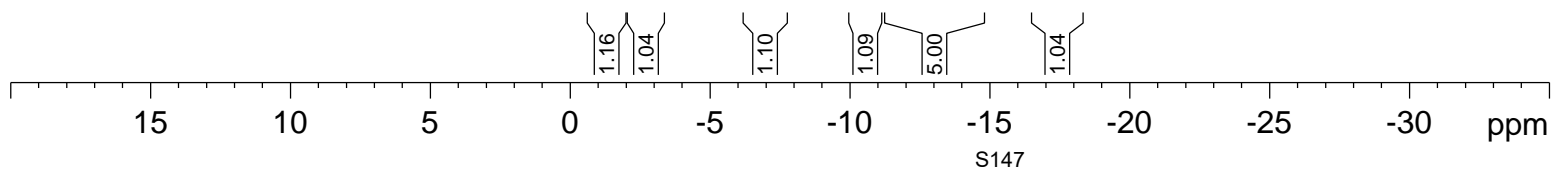

S147

-1.42  
 -1.90  
 -3.19  
 -6.40  
 -7.57  
 -9.95  
 -11.24  
 -12.42  
 -13.46  
 -16.50  
 -17.66

lhr-B-0519-phnhcoome-CDCl3(C)

Current Data Parameters  
 NAME lhr-B-0519-phnhcoome-CDCl3(C)  
 EXPNO 1  
 PROCNO 1

F2 - Acquisition Parameters

Date\_ 20161031  
 Time 9.50 h  
 INSTRUM spect  
 PROBHD Z108618\_0257 (  
 PULPROG zg  
 TD 65536  
 SOLVENT C6D6  
 NS 12  
 DS 2  
 SWH 24038.461 Hz  
 FIDRES 0.366798 Hz  
 AQ 1.3631488 sec  
 RG 287  
 DW 20.800 usec  
 DE 6.50 usec  
 TE 295.6 K  
 D1 2.0000000 sec  
 TD0 1  
 SFO1 128.4096890 MHz  
 NUC1 11B  
 P1 7.50 usec  
 PLW1 55.09999847 W

F2 - Processing parameters

SI 32768  
 SF 128.4097504 MHz  
 WDW EM  
 SSB 0  
 LB 1.00 Hz  
 GB 0  
 PC 1.40

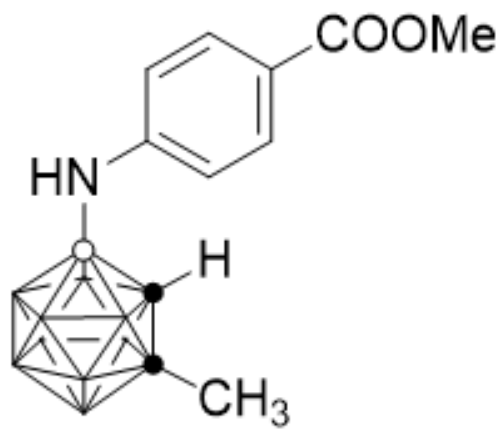

11d

<sup>11</sup>B NMR (128 MHz, CDCl<sub>3</sub>)

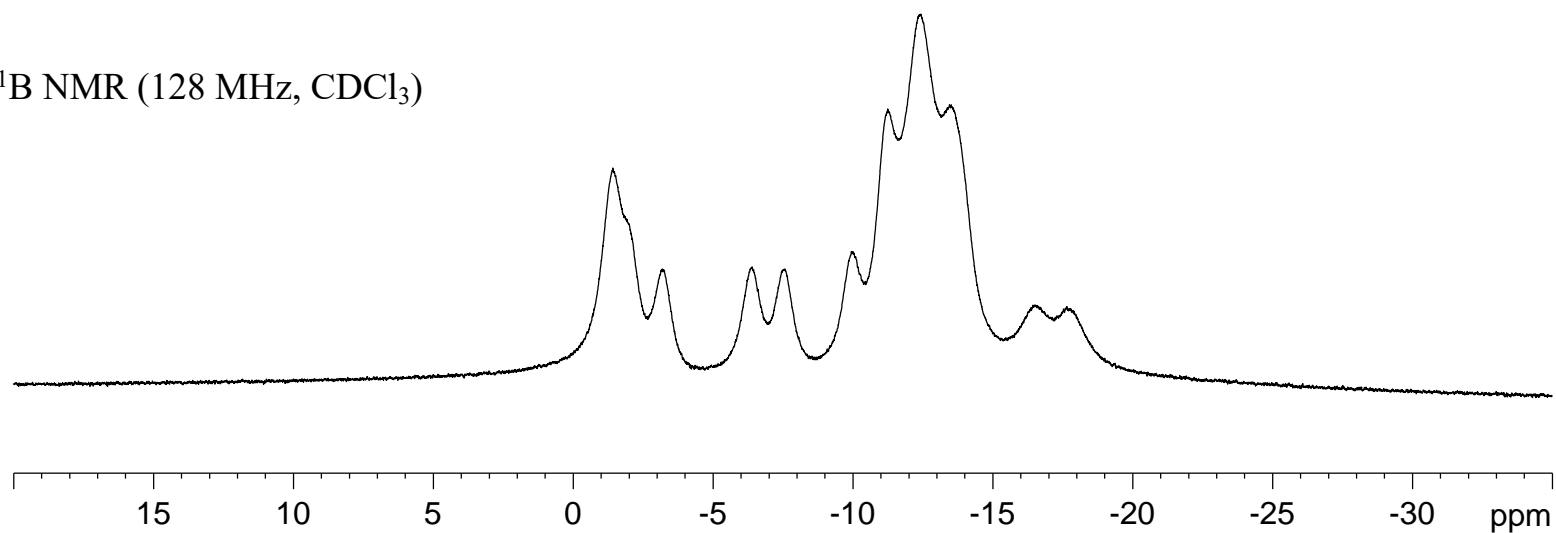



# Thermo QEFMS Analysis Report

## Analysis Info

|               |                                        |                |          |
|---------------|----------------------------------------|----------------|----------|
| Sample Name : | Lhr-519                                | Reference No.: | Qzwx056  |
| Instrument :  | Q Exactive Focus Orbitrap              |                |          |
| Source :      | HESI II                                | Polarity :     | Positive |
| Comment :     | ESI pos, 3.5kV, by LC, with sheath gas |                |          |

## Accurate Mass Measurement

|                                         |                                                                 |
|-----------------------------------------|-----------------------------------------------------------------|
| Molecular formula :                     | C <sub>11</sub> H <sub>21</sub> B <sub>10</sub> NO <sub>2</sub> |
| Experimental Mass [M+Na] <sup>+</sup> : | 330.24635                                                       |
| Theoretical Mass [M+Na] <sup>+</sup> :  | 330.24677                                                       |
| Error (ppm) :                           | 1.2                                                             |

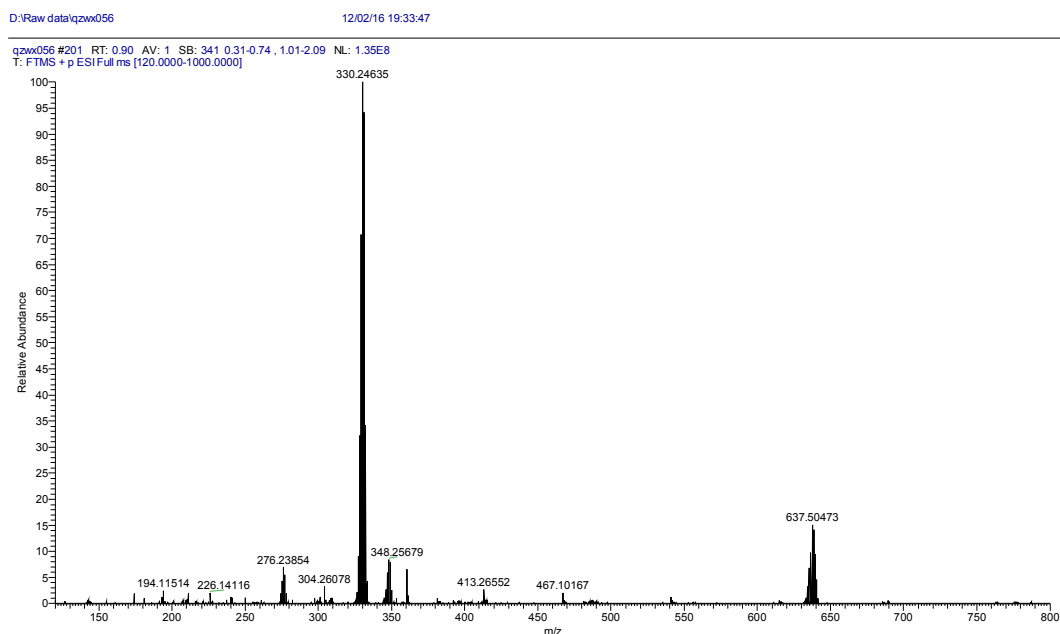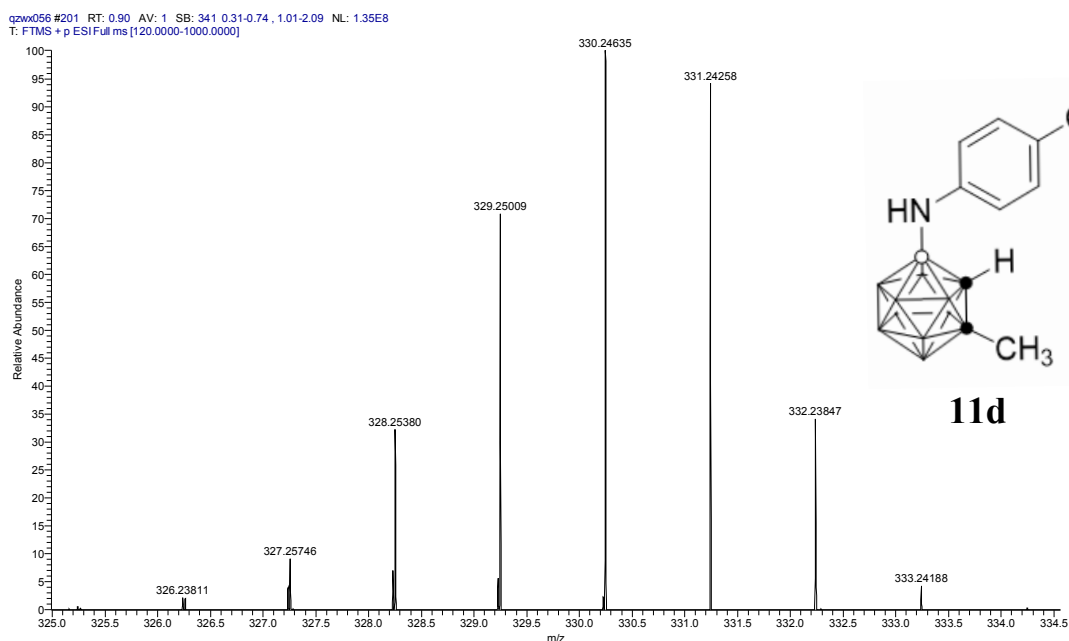

7.260  
6.474  
6.466  
6.455  
6.449  
6.430  
6.425  
6.413  
6.405  
6.236  
6.230  
6.225  
6.213  
6.208  
6.202  
6.190  
6.185  
6.179

4.104

3.753

2.054

1.573

lhr-H-0549-pn35f-CDCl3

Bruker Advance III 400

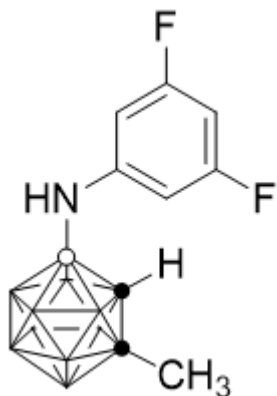

**12d**

<sup>1</sup>H NMR (400 MHz, CDCl<sub>3</sub>)

Current Data Parameters  
NAME lhr-H-0549-pn35f-CDCl3  
EXPNO 1  
PROCNO 1

F2 - Acquisition Parameters  
Date\_ 20161119  
Time 21.10 h  
INSTRUM spect  
PROBHD Z824601\_0021 (  
PULPROG zg30  
TD 65536  
SOLVENT CDCl3  
NS 13  
DS 2  
SWH 8012.820 Hz  
FIDRES 0.122266 Hz  
AQ 4.0894465 sec  
RG 101  
DW 62.400 usec  
DE 6.50 usec  
TE 294.8 K  
D1 1.00000000 sec  
TD0 1  
SF01 400.1324708 MHz  
NUC1 1H  
P1 15.00 usec  
PLW1 8.31000042 W

F2 - Processing parameters  
SI 65536  
SF 400.130098 MHz  
WDW EM  
SSB 0  
LB 0.30 Hz  
GB 0  
PC 1.00

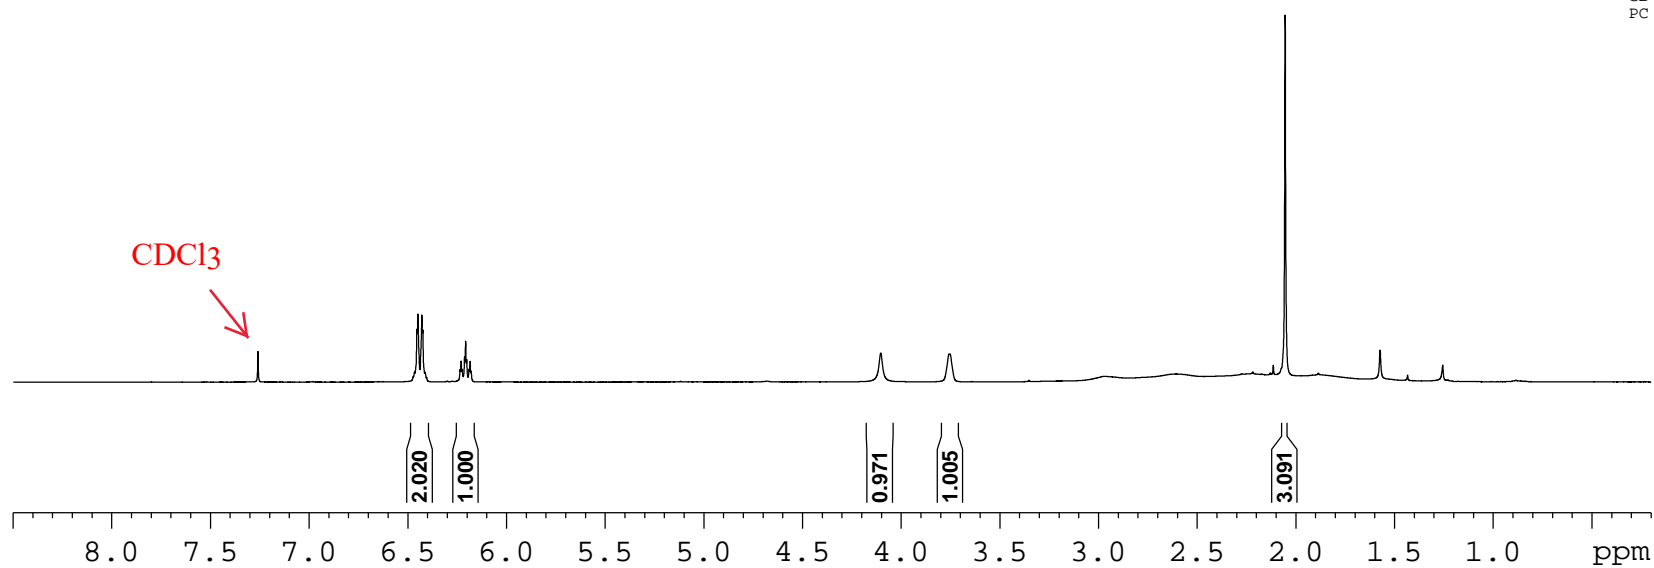

lhr-C-0549-pn35f-CDCl3

Bruker Advance III 400

Current Data Parameters  
NAME lhr-C-0549-pn35f-CDCl3  
EXPNO 1  
PROCNO 1

F2 - Acquisition Parameters  
Date\_ 20161119  
Time 21.12 h  
INSTRUM spect  
PROBHD Z824601\_0021 (  
PULPROG zgpg30  
TD 65536  
SOLVENT CDCl3  
NS 261  
DS 4  
SWH 24038.461 Hz  
FIDRES 0.366798 Hz  
AQ 1.3631488 sec  
RG 203  
DW 20.800 usec  
DE 6.50 usec  
TE 294.9 K  
D1 2.0000000 sec  
D11 0.0300000 sec  
TD0 1  
SFO1 100.6228298 MHz  
NUC1 13C  
P1 9.50 usec  
PLW1 41.2500000 W  
SFO2 400.1316005 MHz  
NUC2 1H  
CPDPRG2 waltz16  
PCPD2 90.00 usec  
PLW2 8.31000042 W  
PLW12 0.23083000 W  
PLW13 0.11611000 W

F2 - Processing parameters  
SI 32768  
SF 100.6127567 MHz  
WDW EM  
SSB 0  
LB 1.00 Hz  
GB 0  
PC 1.40

165.226  
165.069  
162.799  
162.642  
149.659  
149.527  
149.394

99.016  
98.933  
98.816  
98.734  
94.328  
94.069  
93.810  
77.477  
77.160  
76.842  
68.565  
63.345

25.952

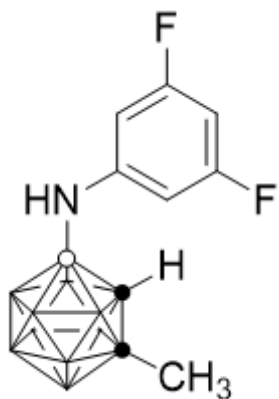

12d

$^{13}\text{C}\{^1\text{H}\}$  NMR (100 MHz,  $\text{CDCl}_3$ )

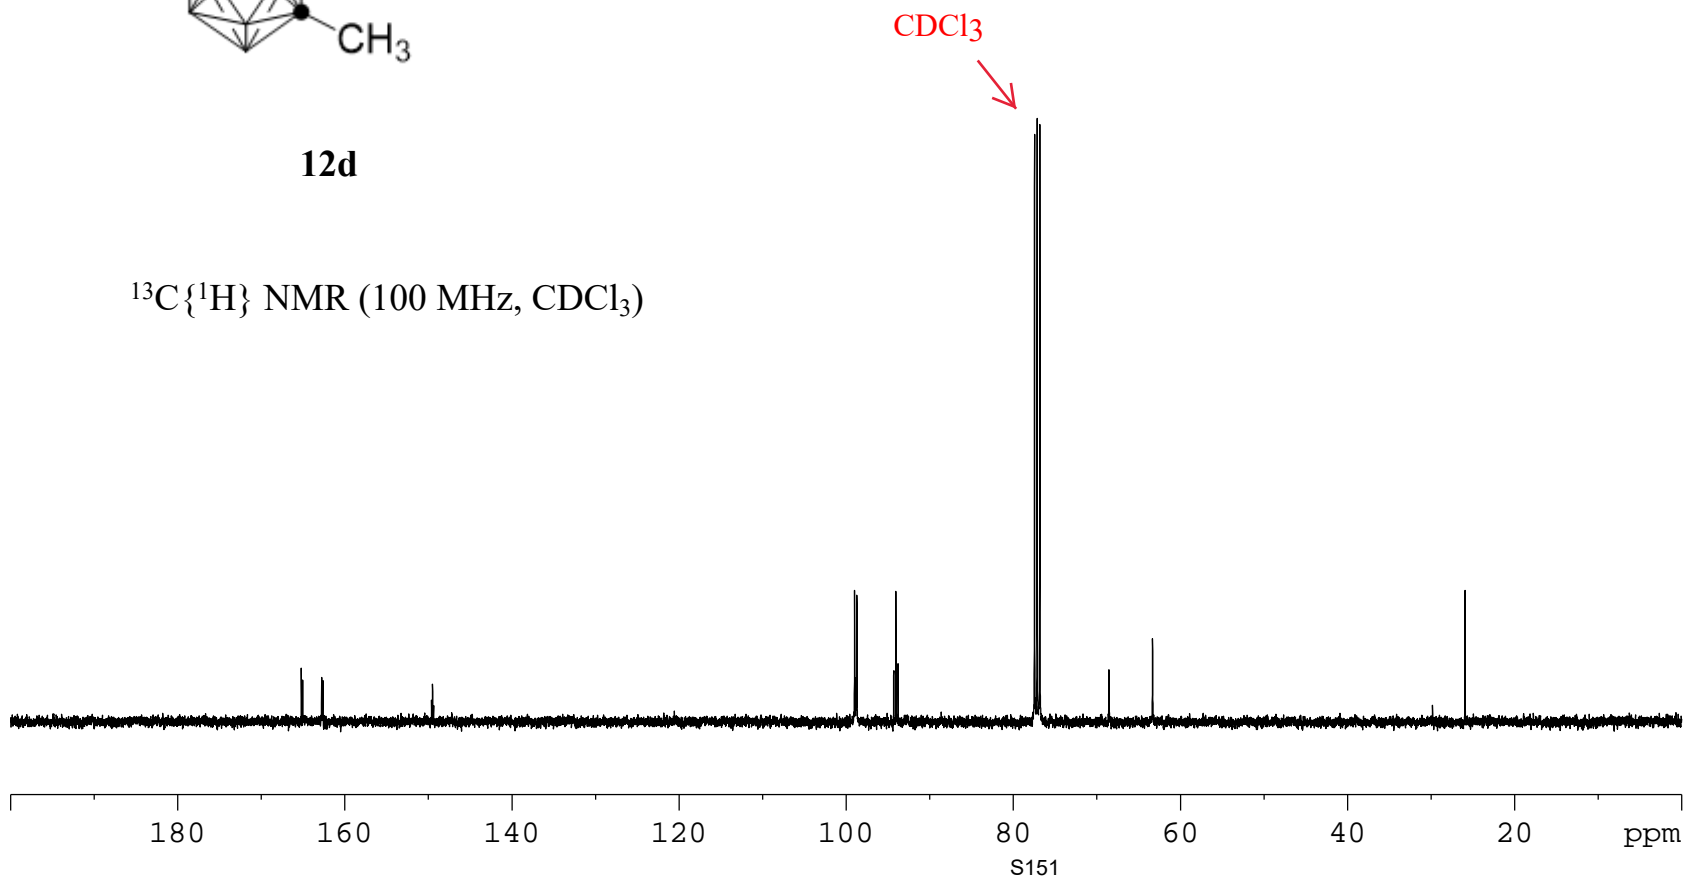

lhr-B-0549-pn35f-CDCl3

Current Data Parameters  
NAME lhr-B-0549-pn35f-CDCl3  
EXPNO 1  
PROCNO 1

F2 - Acquisition Parameters  
Date\_ 20161119  
Time 21.31 h  
INSTRUM spect  
PROBHD Z108618\_0257 (  
PULPROG zgdc  
TD 65536  
SOLVENT C6D6  
NS 12  
DS 4  
SWH 24038.461 Hz  
FIDRES 0.366798 Hz  
AQ 1.3631488 sec  
RG 512  
DW 20.800 usec  
DE 6.50 usec  
TE 296.6 K  
D1 2.0000000 sec  
D11 0.03000000 sec  
TD0 1  
SF01 128.4096890 MHz  
NUC1 11B  
P1 7.50 usec  
PLW1 55.09999847 W  
SF02 400.2316009 MHz  
NUC2 1H  
CPDPRG[2] waltz16  
PCPD2 90.00 usec  
PLW2 13.56000042 W  
PLW12 0.27428001 W

F2 - Processing parameters  
SI 32768  
SF 128.4097615 MHz  
WDW EM  
SSB 0  
LB 1.00 Hz  
GB 0  
PC 1.40

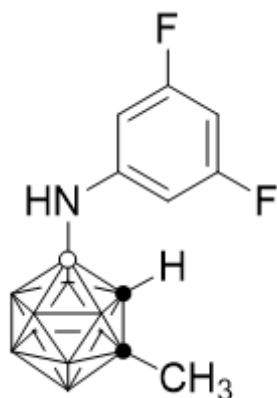

12d

$^{11}\text{B}\{^1\text{H}\}$  NMR (128 MHz,  $\text{CDCl}_3$ )

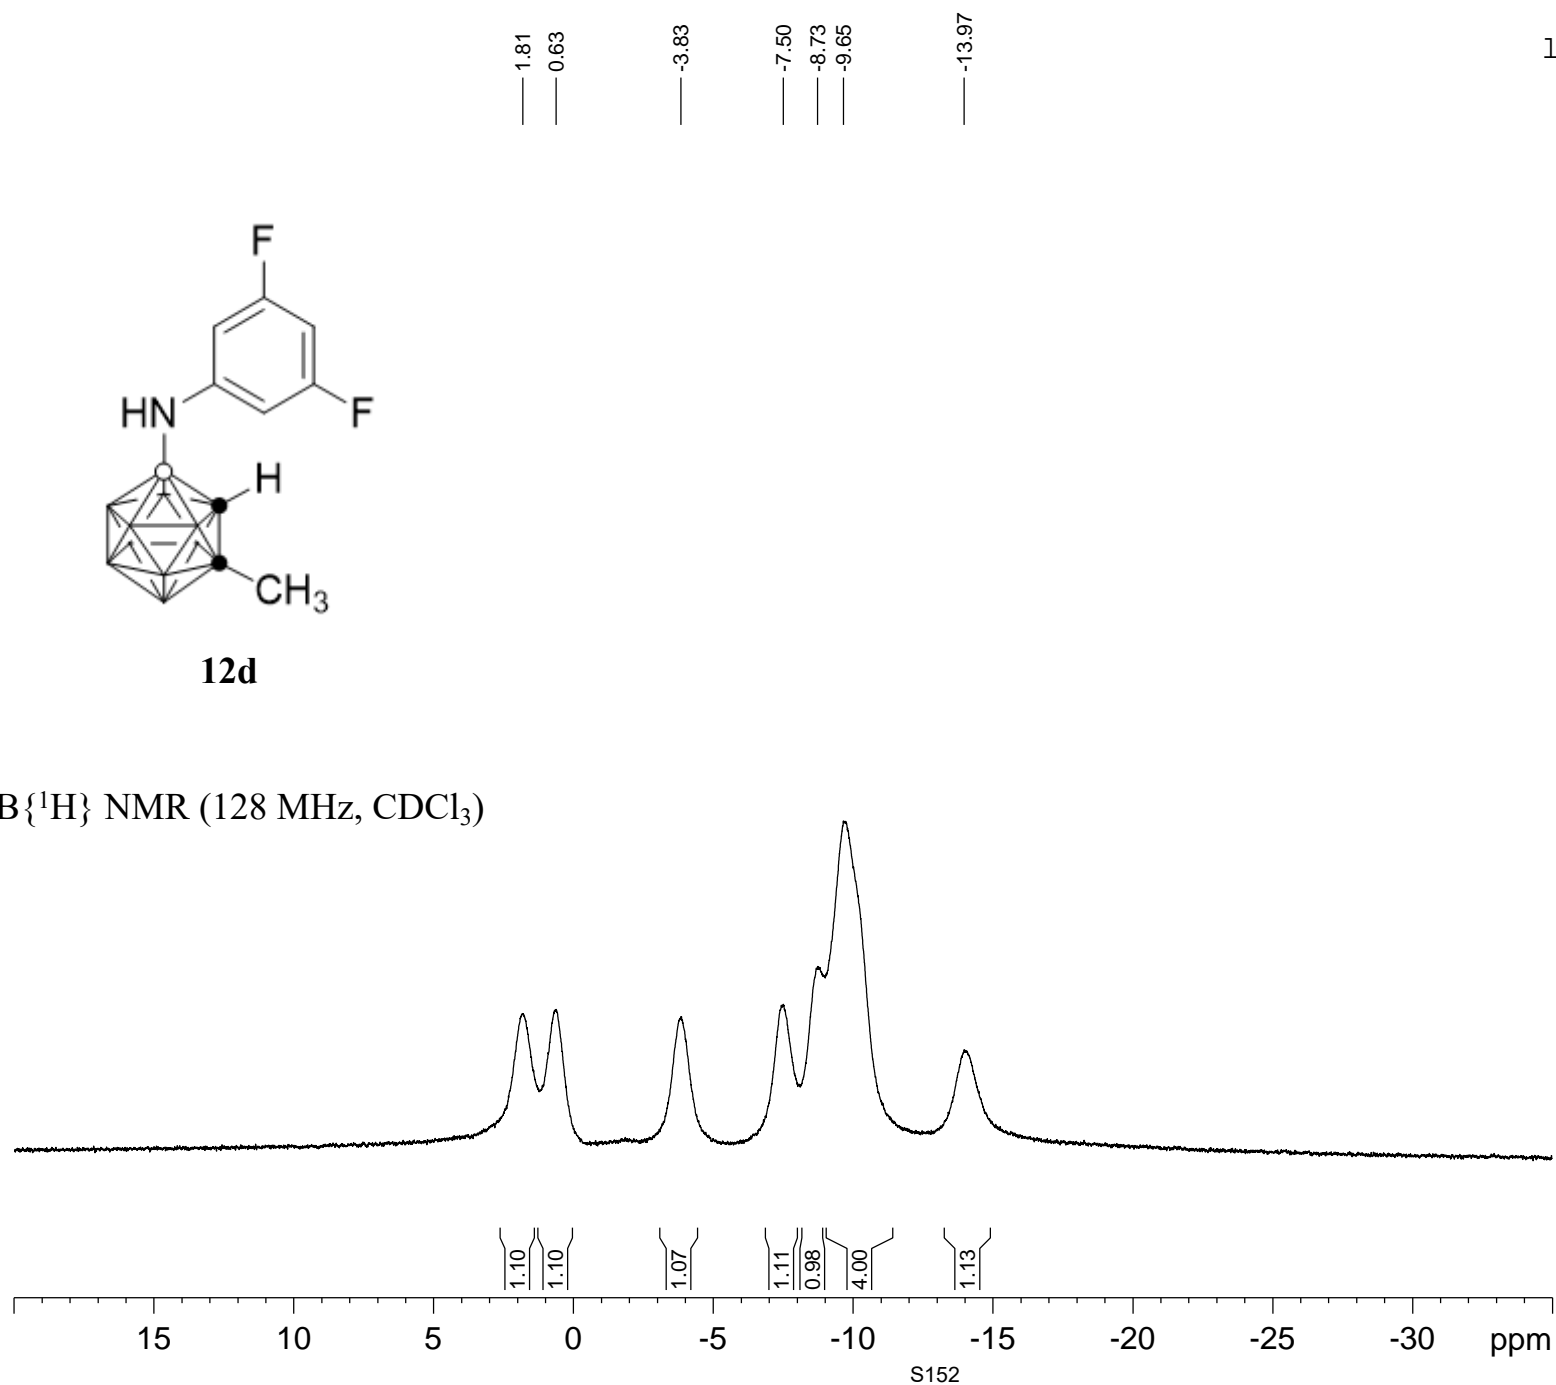

1hr-B-0549-pn35f-CDCl3(C)

Current Data Parameters  
NAME 1hr-B-0549-pn35f-CDCl3(C)  
EXPNO 1  
PROCNO 1

F2 - Acquisition Parameters  
Date\_ 20161119  
Time 21.33 h  
INSTRUM spect  
PROBHD z108618\_0257 (  
PULPROG zg  
TD 65536  
SOLVENT C6D6  
NS 16  
DS 2  
SWH 24038.461 Hz  
FIDRES 0.366798 Hz  
AQ 1.3631488 sec  
RG 512  
DW 20.800 usec  
DE 6.50 usec  
TE 296.3 K  
D1 2.00000000 sec  
TD0 1  
SFO1 128.4096890 MHz  
NUC1 11B  
P1 7.50 usec  
PLW1 55.09999847 W

F2 - Processing parameters  
SI 32768  
SF 128.4097504 MHz  
WDW EM  
SSB 0  
LB 1.00 Hz  
GB 0  
PC 1.40

1.89  
1.45  
0.19  
-3.14  
-4.30  
-6.83  
-8.03  
-9.10  
-10.25  
-13.26  
-14.50

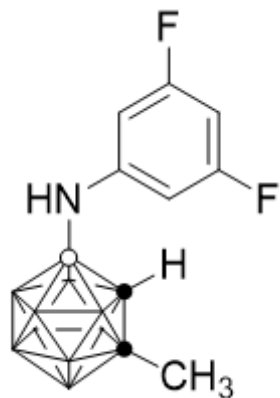

12d

$^{11}\text{B}$  NMR (128 MHz,  $\text{CDCl}_3$ )

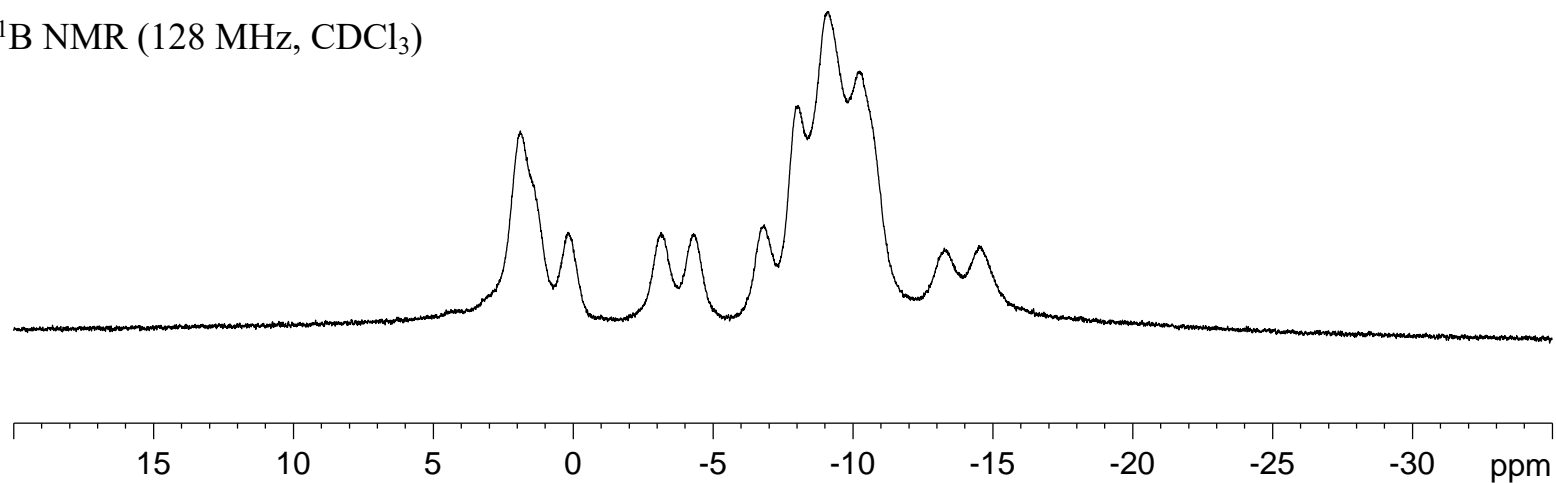

-106.83

lhr-F-0549-pn35f-CDC

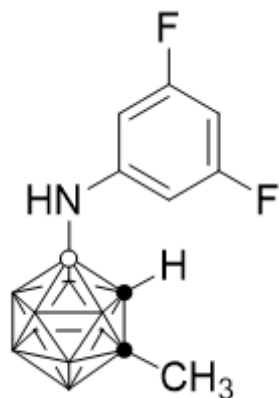

12d

$^{19}\text{F}\{^1\text{H}\}$  NMR (376 MHz,  $\text{CDCl}_3$ )

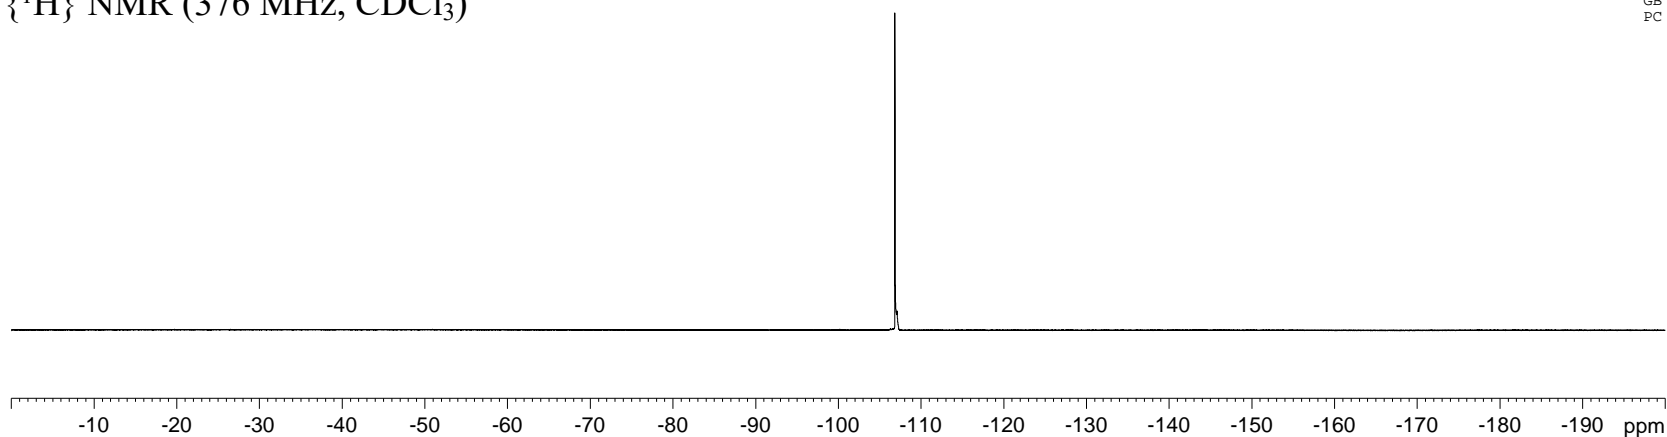

Current Data Parameters  
NAME lhr-F-0549-pn35f-CDC13  
EXPNO 1  
PROCNO 1

F2 - Acquisition Parameters  
Date\_ 20161119  
Time 21.35 h  
INSTRUM spect  
PROBHD Z108618\_0257 (  
PULPROG zgfhigcn.2  
TD 131072  
SOLVENT C6D6  
NS 8  
DS 4  
SWH 89285.711 Hz  
FIDRES 0.681196 Hz  
AQ 0.7340032 sec  
RG 645  
DW 5.600 usec  
DE 6.50 usec  
TE 296.2 K  
D1 1.0000000 sec  
D11 0.0300000 sec  
D12 0.0000200 sec  
TD0 1  
SFO1 376.5548010 MHz  
NUC1 19F  
P1 14.70 usec  
PLW1 18.3600061 W  
SFO2 400.2316009 MHz  
NUC2 1H  
CPDPRG[2] waltz16  
PCPD2 90.00 usec  
PLW2 13.5600042 W  
PLW12 0.27428001 W

F2 - Processing parameters  
SI 65536  
SF 376.5924602 MHz  
WDW EM  
SSB 0  
LB 0.30 Hz  
GB 0  
PC 1.00

-106.82

1hr-F-0549-pn35f-CDCl<sub>3</sub>

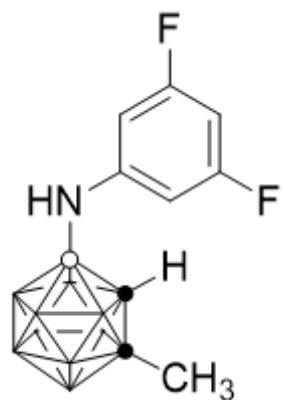

12d

<sup>19</sup>F NMR (376 MHz, CDCl<sub>3</sub>)

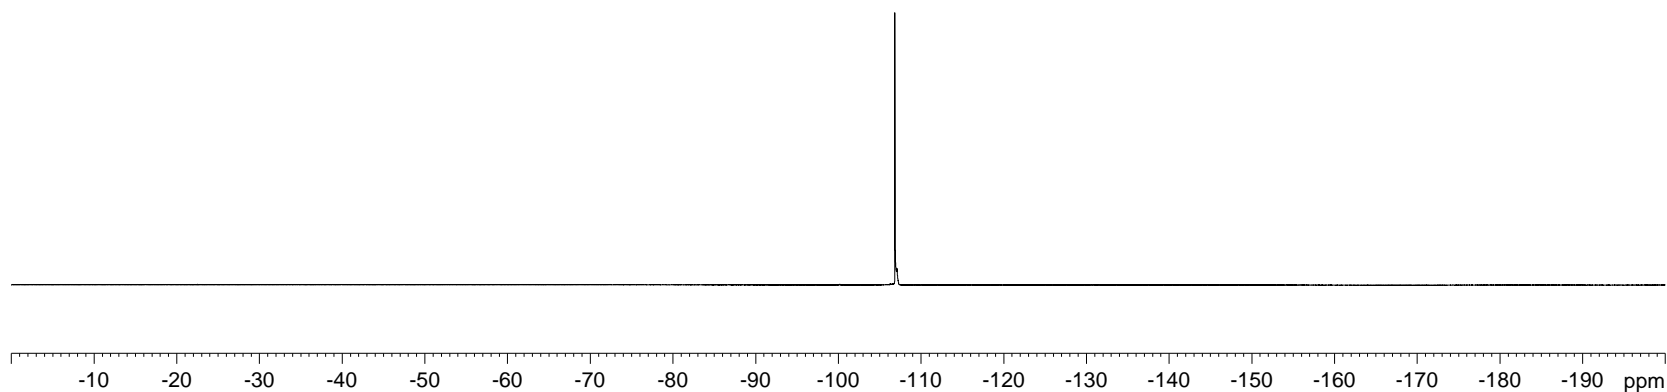

Current Data Parameters  
NAME 1hr-F-0549-pn35f-CDCl3(C)  
EXPNO 1  
PROCNO 1

F2 - Acquisition Parameters  
Date\_ 20161119  
Time 21.35 h  
INSTRUM spect  
PROBHD Z108618\_0257 (  
PULPROG zgfhigcn.2  
TD 131072  
SOLVENT C6D6  
NS 16  
DS 4  
SWH 89285.711 Hz  
FIDRES 0.681196 Hz  
AQ 0.7340032 sec  
RG 645  
DW 5.600 usec  
DE 6.50 usec  
TE 296.3 K  
D1 1.0000000 sec  
D11 0.0300000 sec  
D12 0.0000200 sec  
TD0 1  
SFO1 376.5548010 MHz  
NUC1 19F  
P1 14.70 usec  
PLW1 18.3600061 W  
SFO2 400.2316009 MHz  
NUC2 1H  
CPDPRG2 waltz16  
PCPD2 90.00 usec  
PLW2 13.5600042 W  
PLW12 0.27428001 W

F2 - Processing parameters  
SI 65536  
SF 376.5924602 MHz  
WDW EM  
SSB 0  
LB 0.30 Hz  
GB 0  
PC 1.00

# Thermo QEFMS Analysis Report

## Analysis Info

|               |                                        |                |          |
|---------------|----------------------------------------|----------------|----------|
| Sample Name : | Lhr-549                                | Reference No.: | Qzwx067  |
| Instrument :  | Q Exactive Focus Orbitrap              |                |          |
| Source :      | HESI II                                | Polarity :     | Positive |
| Comment :     | ESI pos, 3.5kV, by LC, with sheath gas |                |          |

## Accurate Mass Measurement

|                                        |                                                                 |
|----------------------------------------|-----------------------------------------------------------------|
| Molecular formula :                    | C <sub>9</sub> H <sub>17</sub> B <sub>10</sub> F <sub>2</sub> N |
| Experimental Mass [M+H] <sup>+</sup> : | 286.24039                                                       |
| Theoretical Mass [M+H] <sup>+</sup> :  | 286.24050                                                       |
| Error (ppm) :                          | 0.3                                                             |

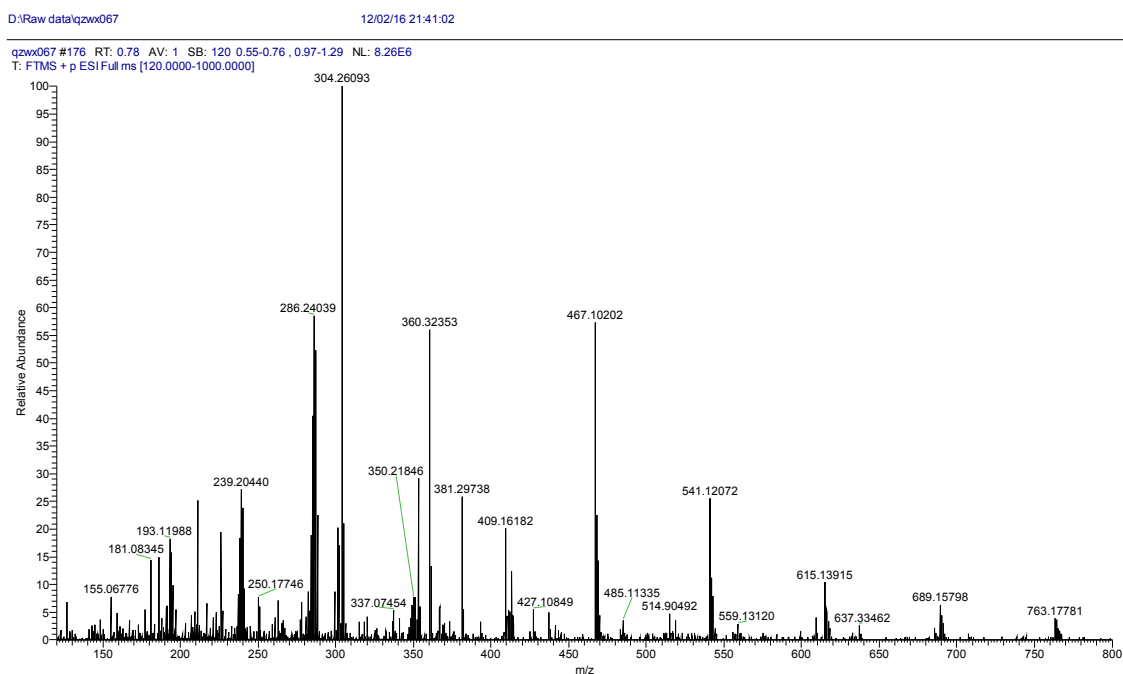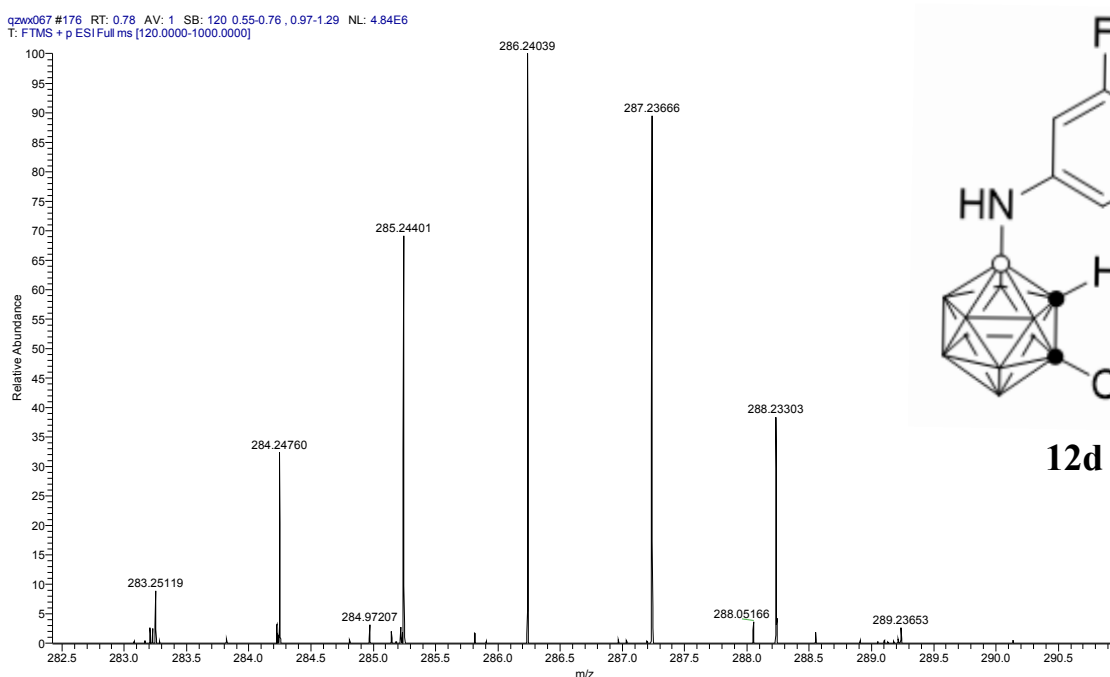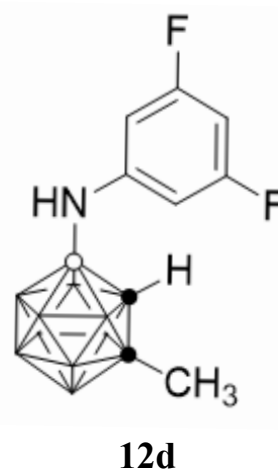



lhr-H-0548-pnscf3-CDCl3

Bruker Advance III 400

Current Data Parameters  
NAME lhr-H-0548-pnscf3-CDCl3  
EXPNO 1  
PROCNO 1

F2 - Acquisition Parameters  
Date\_ 20161118  
Time 19.11 h  
INSTRUM spect  
PROBHD z824601\_0021 (   
PULPROG zg30  
TD 65536  
SOLVENT CDCl3  
NS 10  
DS 2  
SWH 8012.820 Hz  
FIDRES 0.122266 Hz  
AQ 4.0894465 sec  
RG 32  
DW 62.400 usec  
DE 6.50 usec  
TE 295.0 K  
D1 1.00000000 sec  
TD0 1  
SF01 400.1324708 MHz  
NUC1 1H  
P1 15.00 usec  
PLW1 8.31000042 W

F2 - Processing parameters  
SI 65536  
SF 400.1300097 MHz  
WDW EM  
SSB 0  
LB 0.30 Hz  
GB 0  
PC 1.00

7.440  
7.418  
7.260  
6.960  
6.938

4.189  
3.760

2.051

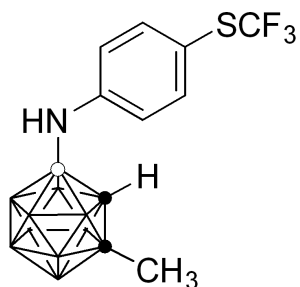

13d

<sup>1</sup>H NMR (400 MHz, CDCl<sub>3</sub>)

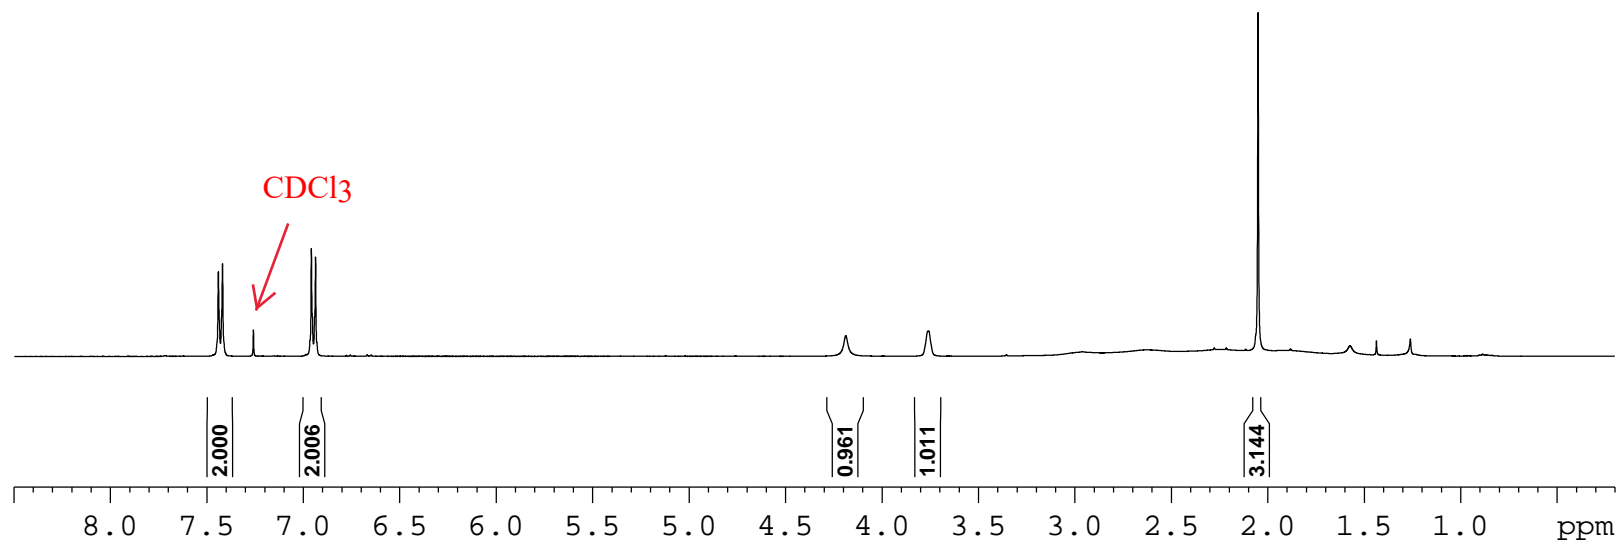

lhr-H-0548-re-cdcl3

— 149.73  
— 138.13  
— 133.53  
— 131.08  
— 128.62  
— 126.17

— 116.50  
— 111.79  
— 111.77

— 77.41  
— 77.16  
— 76.91  
— 68.52  
— 63.42

— 25.96

Current Data Parameters  
NAME lhr-H-0548-re-cdcl3  
EXPNO 1  
PROCNO 1

F2 - Acquisition Parameters  
Date\_ 20190403  
Time 11.01 h  
INSTRUM spect  
PROBHD Z149001\_0010 (  
PULPROG zgpg30  
TD 65536  
SOLVENT CDCl3  
NS 1024  
DS 4  
SWH 29761.904 Hz  
FIDRES 0.908261 Hz  
AQ 1.1010048 sec  
RG 206.72  
DW 16.800 usec  
DE 18.00 usec  
TE 298.0 K  
D1 2.00000000 sec  
D11 0.03000000 sec  
TD0 1  
SFO1 125.7703643 MHz  
NUC1 13C  
P1 10.00 usec  
PLW1 61.00000000 W  
SFO2 500.1320005 MHz  
NUC2 1H  
CPDPRG[2] waltz16  
PCPD2 80.00 usec  
PLW2 15.00000000 W  
PLW12 0.29663000 W  
PLW13 0.14920001 W

F2 - Processing parameters  
SI 32768  
SF 125.7577735 MHz  
WDW EM  
SSB 0  
LB 1.00 Hz  
GB 0  
PC 1.40

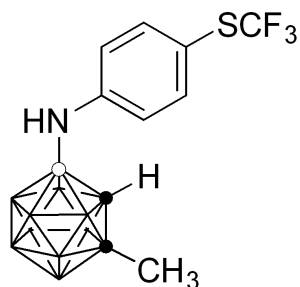

13d

$^{13}\text{C}\{^1\text{H}\}$  NMR (100 MHz,  $\text{CDCl}_3$ )

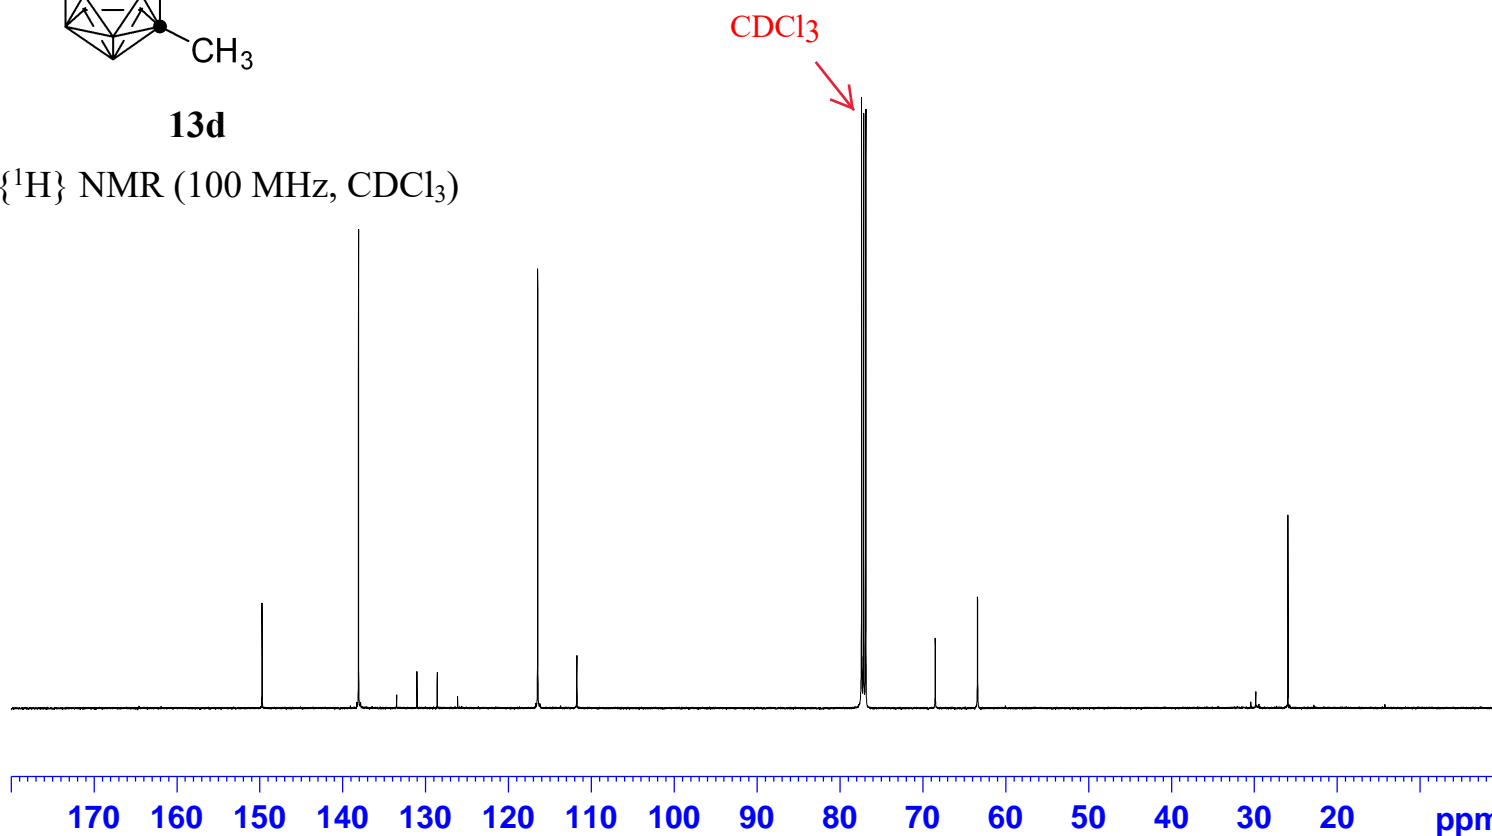

1hr-B-0548-pnscf3-CDCl3

Current Data Parameters  
NAME 1hr-B-0548-pnscf3-CDCl3  
EXPNO 1  
PROCNO 1

F2 - Acquisition Parameters  
Date\_ 20161119  
Time 9.40 h  
INSTRUM spect  
PROBHD Z108618\_0257 (  
PULPROG zgdc  
TD 65536  
SOLVENT CDCl3  
NS 14  
DS 4  
SWH 24038.461 Hz  
FIDRES 0.366798 Hz  
AQ 1.3631488 sec  
RG 287  
DW 20.800 usec  
DE 6.50 usec  
TE 296.5 K  
D1 2.00000000 sec  
D11 0.03000000 sec  
TD0 1  
SFO1 128.4096890 MHz  
NUC1 11B  
P1 7.50 usec  
PLW1 55.09999847 W  
SFO2 400.2316009 MHz  
NUC2 1H  
CPDPRG[2] waltz16  
PCPD2 90.00 usec  
PLW2 13.56000042 W  
PLW12 0.27428001 W

F2 - Processing parameters  
SI 32768  
SF 128.4097615 MHz  
WDW EM  
SSB 0  
LB 1.00 Hz  
GB 0  
PC 1.40

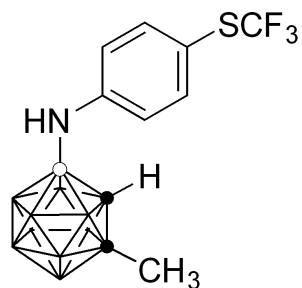

13d

$^{11}\text{B}\{^1\text{H}\}$  NMR (128 MHz,  $\text{CDCl}_3$ )

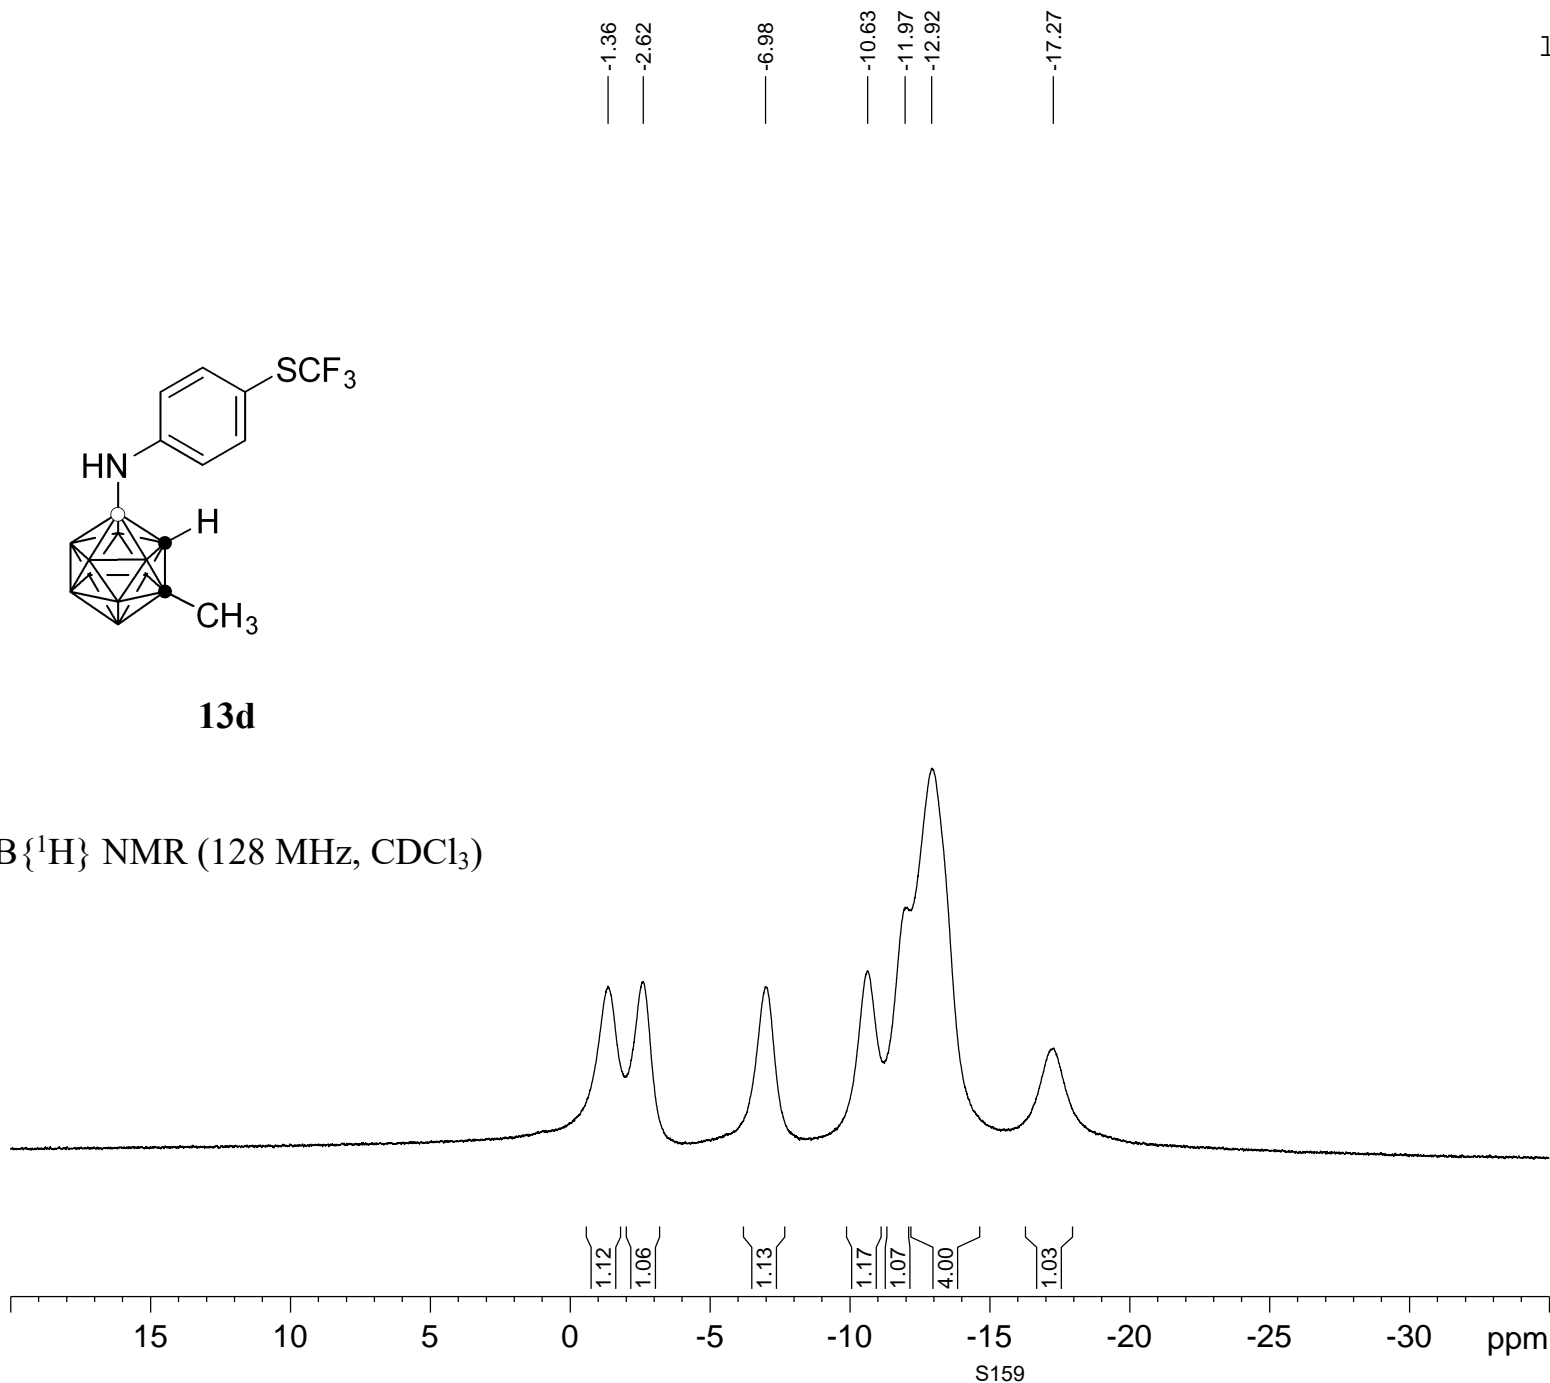

lhr-B-0548-pnscf3-CDCl3(C)

Current Data Parameters  
NAME lhr-B-0548-pnscf3-CDCl3(C)  
EXPNO 1  
PROCNO 1

F2 - Acquisition Parameters  
Date\_ 20161119  
Time 9.41 h  
INSTRUM spect  
PROBHD Z108618\_0257 (  
PULPROG zg  
TD 65536  
SOLVENT CDCl3  
NS 16  
DS 2  
SWH 24038.461 Hz  
FIDRES 0.366798 Hz  
AQ 1.3631488 sec  
RG 203  
DW 20.800 usec  
DE 6.50 usec  
TE 296.1 K  
D1 2.0000000 sec  
TD0 1  
SFO1 128.4096890 MHz  
NUC1 11B  
P1 7.50 usec  
PLW1 55.09999847 W

F2 - Processing parameters  
SI 32768  
SF 128.4097504 MHz  
WDW EM  
SSB 0  
LB 1.00 Hz  
GB 0  
PC 1.40

1.27  
1.84  
3.10  
6.34  
7.49  
9.97  
11.24  
12.35  
13.48  
16.58  
17.78

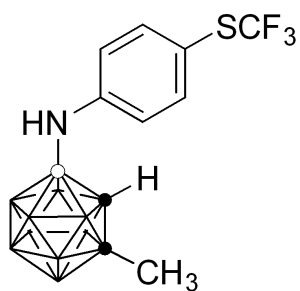

13d

$^{11}\text{B}$  NMR (128 MHz,  $\text{CDCl}_3$ )

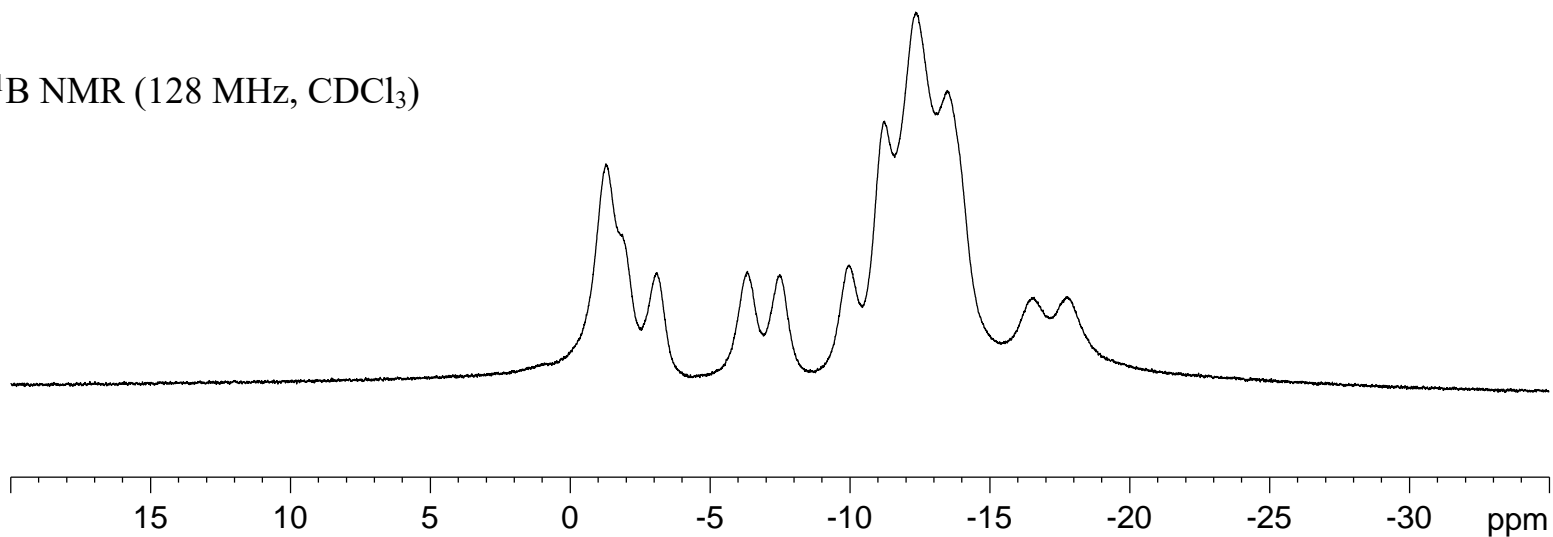

Current Data Parameters  
NAME lhr-F-0548-pnscf3-CDCl3  
EXPNO 1  
PROCNO 1

F2 - Acquisition Parameters  
Date\_ 20161119  
Time 9.44 h  
INSTRUM spect  
PROBHD Z108618\_0257 (  
PULPROG zgfhigqn.2  
TD 131072  
SOLVENT CDCl3  
NS 25  
DS 4  
SWH 89285.711 Hz  
FIDRES 0.681196 Hz  
AQ 0.7340032 sec  
RG 645  
DW 5.600 usec  
DE 6.50 usec  
TE 296.1 K  
D1 1.0000000 sec  
D11 0.0300000 sec  
D12 0.0000200 sec  
TD0 1  
SFO1 376.5548010 MHz  
NUC1 19F  
P1 14.70 usec  
PLW1 18.3600061 W  
SFO2 400.2316009 MHz  
NUC2 1H  
CPDPRG[2] waltz16  
PCPD2 90.00 usec  
PLW2 13.5600042 W  
PLW12 0.27428001 W

F2 - Processing parameters  
SI 65536  
SF 376.5924602 MHz  
WDW EM  
SSB 0  
LB 0.30 Hz  
GB 0  
PC 1.00

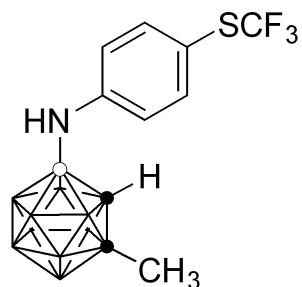

13d

<sup>19</sup>F {<sup>1</sup>H} NMR (376 MHz, CDCl<sub>3</sub>)

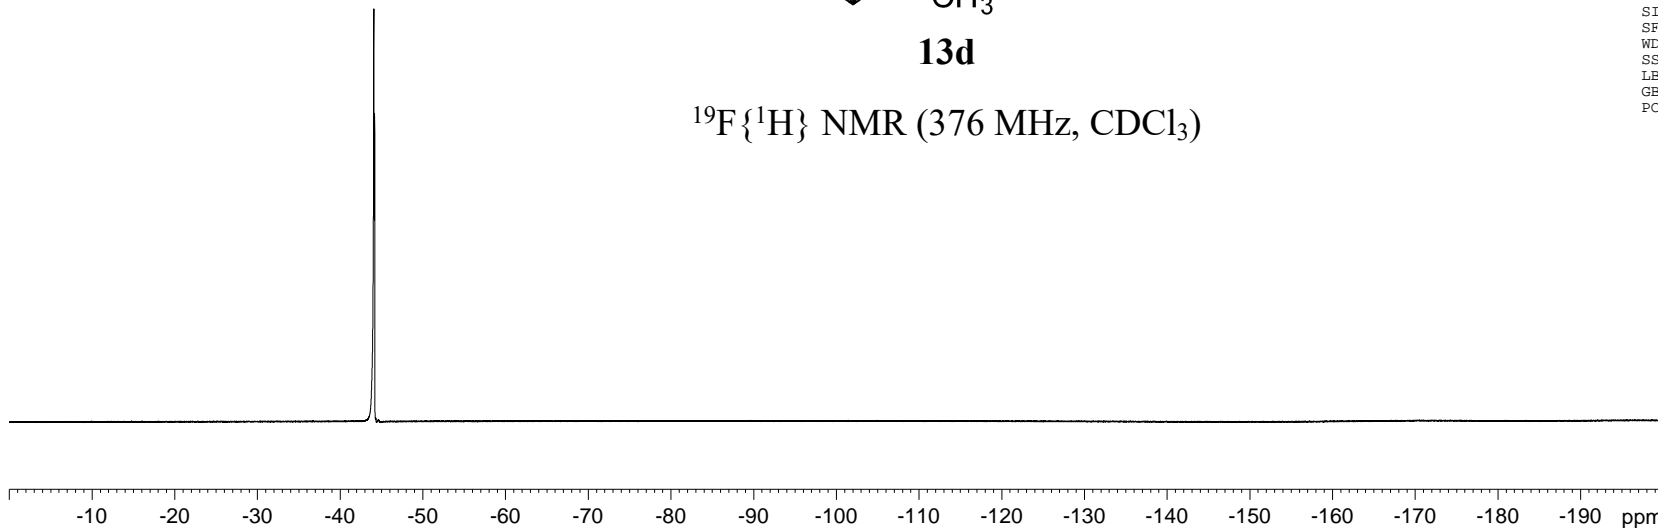

-44.08

lhr-F-0548-pnscf3-CDCl3(C)

Current Data Parameters  
NAME lhr-F-0548-pnscf3-CDCl3(C)  
EXPNO 1  
PROCNO 1

F2 - Acquisition Parameters  
Date\_ 20161119  
Time 9.45 h  
INSTRUM spect  
PROBHD Z108618\_0257 (  
PULPROG zgfhigpn.2  
TD 131072  
SOLVENT CDCl3  
NS 16  
DS 4  
SWH 89285.711 Hz  
FIDRES 0.681196 Hz  
AQ 0.7340032 sec  
RG 645  
DW 5.600 usec  
DE 6.50 usec  
TE 296.2 K  
D1 1.0000000 sec  
D11 0.0300000 sec  
D12 0.0000200 sec  
TD0 1  
SFO1 376.5548010 MHz  
NUC1 19F  
P1 14.70 usec  
PLW1 18.3600061 W  
SFO2 400.2316009 MHz  
NUC2 1H  
CPDPRG[2] waltz16  
PCPD2 90.00 usec  
PLW2 13.5600042 W  
PLW12 0.27428001 W

F2 - Processing parameters  
SI 65536  
SF 376.5924602 MHz  
WDW EM  
SSB 0  
LB 0.30 Hz  
GB 0  
PC 1.00

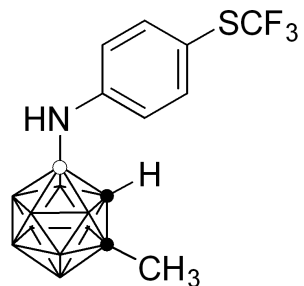

13d

<sup>19</sup>F NMR (376 MHz, CDCl<sub>3</sub>)

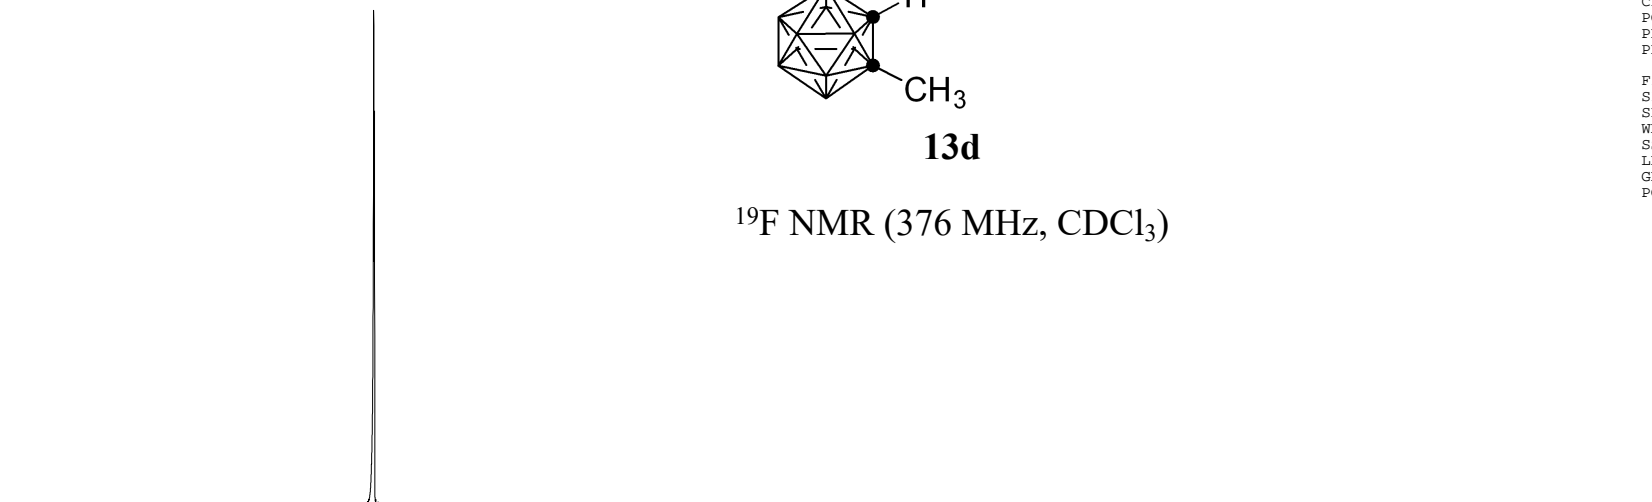

-10 -20 -30 -40 -50 -60 -70 -80 -90 -100 -110 -120 -130 -140 -150 -160 -170 -180 -190 ppm

# Thermo QEFMS Analysis Report

## Analysis Info

|               |                                        |                |          |
|---------------|----------------------------------------|----------------|----------|
| Sample Name : | Lhr-548                                | Reference No.: | Qzwx068  |
| Instrument :  | Q Exactive Focus Orbitrap              |                |          |
| Source :      | HESI II                                | Polarity :     | Positive |
| Comment :     | ESI pos, 3.5kV, by LC, with sheath gas |                |          |

## Accurate Mass Measurement

|                                        |                                                                   |
|----------------------------------------|-------------------------------------------------------------------|
| Molecular formula :                    | C <sub>10</sub> H <sub>18</sub> B <sub>10</sub> F <sub>3</sub> NS |
| Experimental Mass [M+H] <sup>+</sup> : | 350.21830                                                         |
| Theoretical Mass [M+H] <sup>+</sup> :  | 350.21886                                                         |
| Error (ppm) :                          | 1.6                                                               |

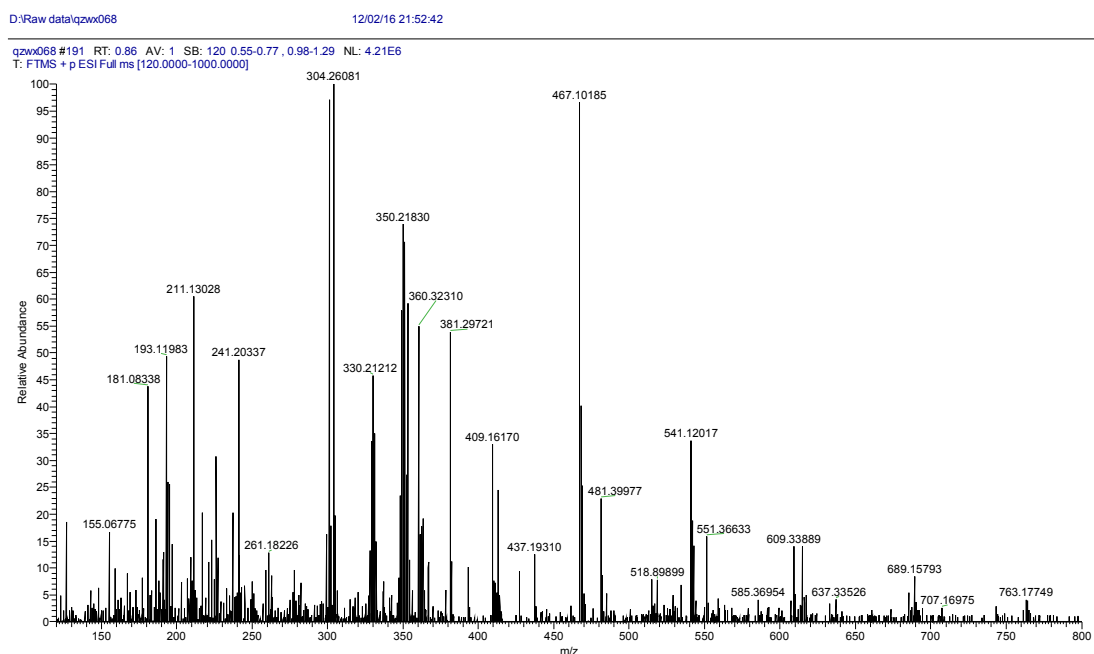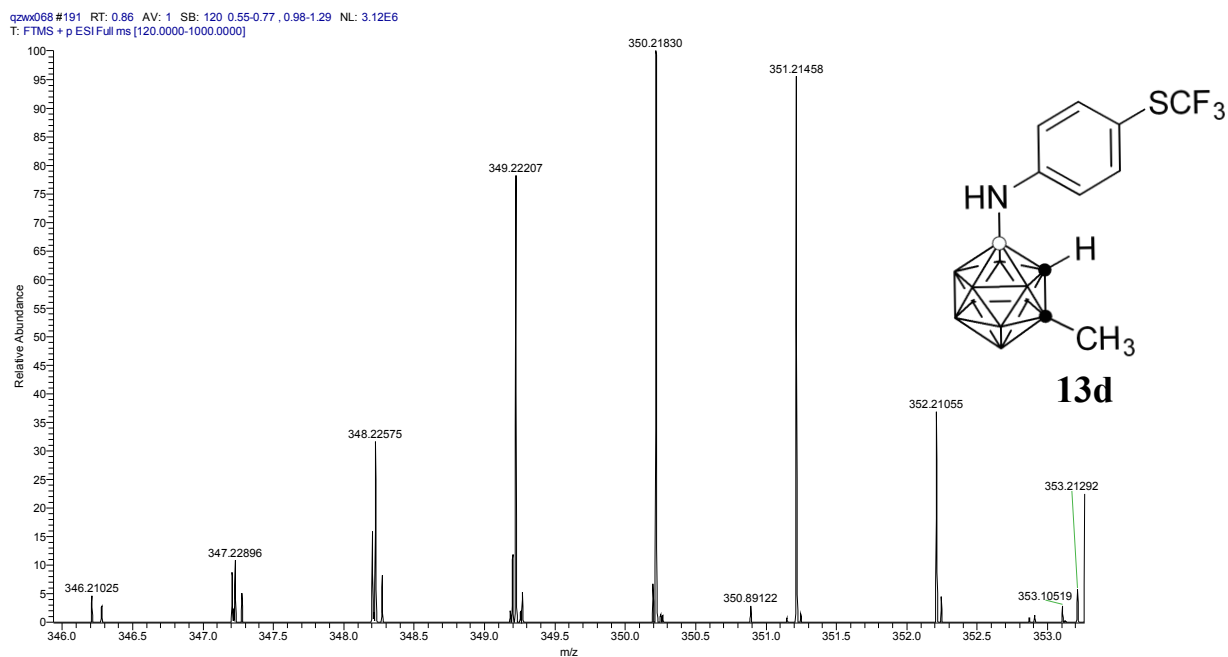

7.654  
7.633  
7.260  
6.986  
6.964

4.533

3.942

2.988

2.055

lhr-H-0550-pnsoc-CDCl3

Bruker Advance III 400

Current Data Parameters  
NAME lhr-H-0550-pnsoc-CDCl3  
EXPNO 2  
PROCNO 1

F2 - Acquisition Parameters  
Date\_ 20161123  
Time 16.25 h  
INSTRUM spect  
PROBHD z824601\_0021 (  
PULPROG zg30  
TD 65536  
SOLVENT CDCl3  
NS 12  
DS 2  
SWH 8012.820 Hz  
FIDRES 0.122266 Hz  
AQ 4.0894465 sec  
RG 1  
DW 62.400 usec  
DE 6.50 usec  
TE 295.2 K  
D1 1.00000000 sec  
TD0 1  
SF01 400.1324708 MHz  
NUC1 1H  
P1 15.00 usec  
PLW1 8.31000042 W

F2 - Processing parameters  
SI 65536  
SF 400.1300098 MHz  
WDW EM  
SSB 0  
LB 0.30 Hz  
GB 0  
PC 1.00

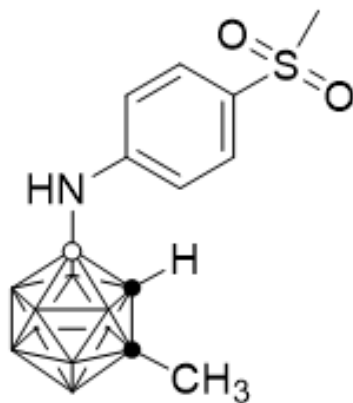

14d

<sup>1</sup>H NMR (400 MHz, CDCl<sub>3</sub>)

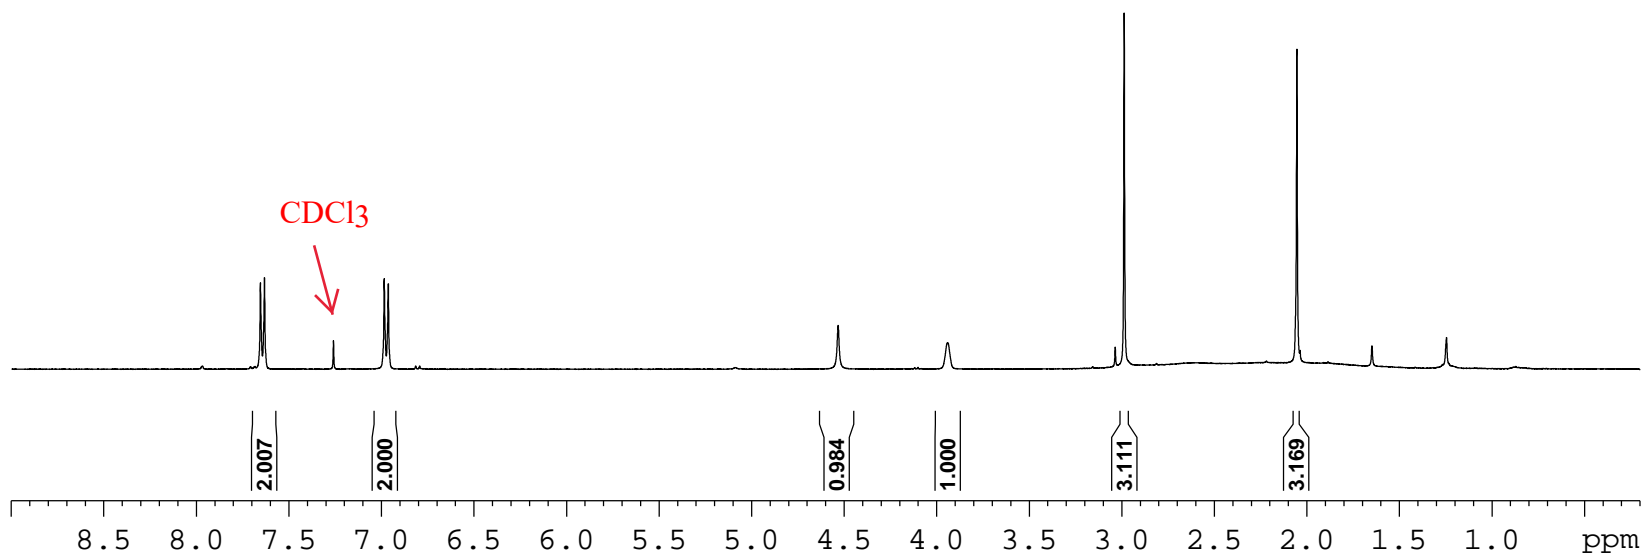



1hr-C-0550-pnsooc-CDCl3

Bruker Advance III 400

Current Data Parameters  
NAME 1hr-C-0550-pnsooc-CDCl3  
EXPNO 2  
PROCNO 1

F2 - Acquisition Parameters  
Date\_ 20161123  
Time 16.28 h  
INSTRUM spect  
PROBHD Z824601\_0021 ( )  
PULPROG zgpg30  
TD 65536  
SOLVENT CDCl3

NS 167  
DS 4  
SWH 24038.461 Hz  
FIDRES 0.366798 Hz  
AQ 1.3631488 sec  
RG 203  
DW 20.800 usec  
DE 6.50 usec  
TE 295.3 K  
D1 2.00000000 sec  
D11 0.03000000 sec  
TD0 1  
SFO1 100.6228298 MHz  
NUC1 13C  
P1 9.50 usec  
PLW1 41.25000000 W  
SFO2 400.1316005 MHz  
NUC2 1H  
CPDPRG[2] waltz16  
PCPD2 90.00 usec  
PLW2 8.31000042 W  
PLW12 0.23083000 W  
PLW13 0.11611000 W

F2 - Processing parameters  
SI 32768  
SF 100.6127582 MHz  
WDW EM  
SSB 0  
LB 1.00 Hz  
GB 0  
PC 1.40

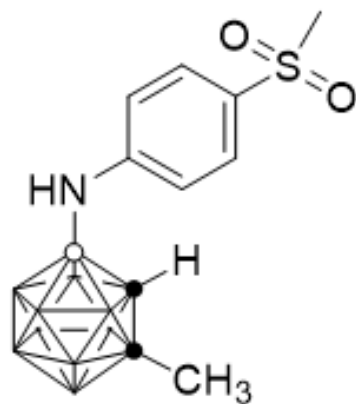

14d

$^{13}\text{C}\{^1\text{H}\}$  NMR (100 MHz,  $\text{CDCl}_3$ )

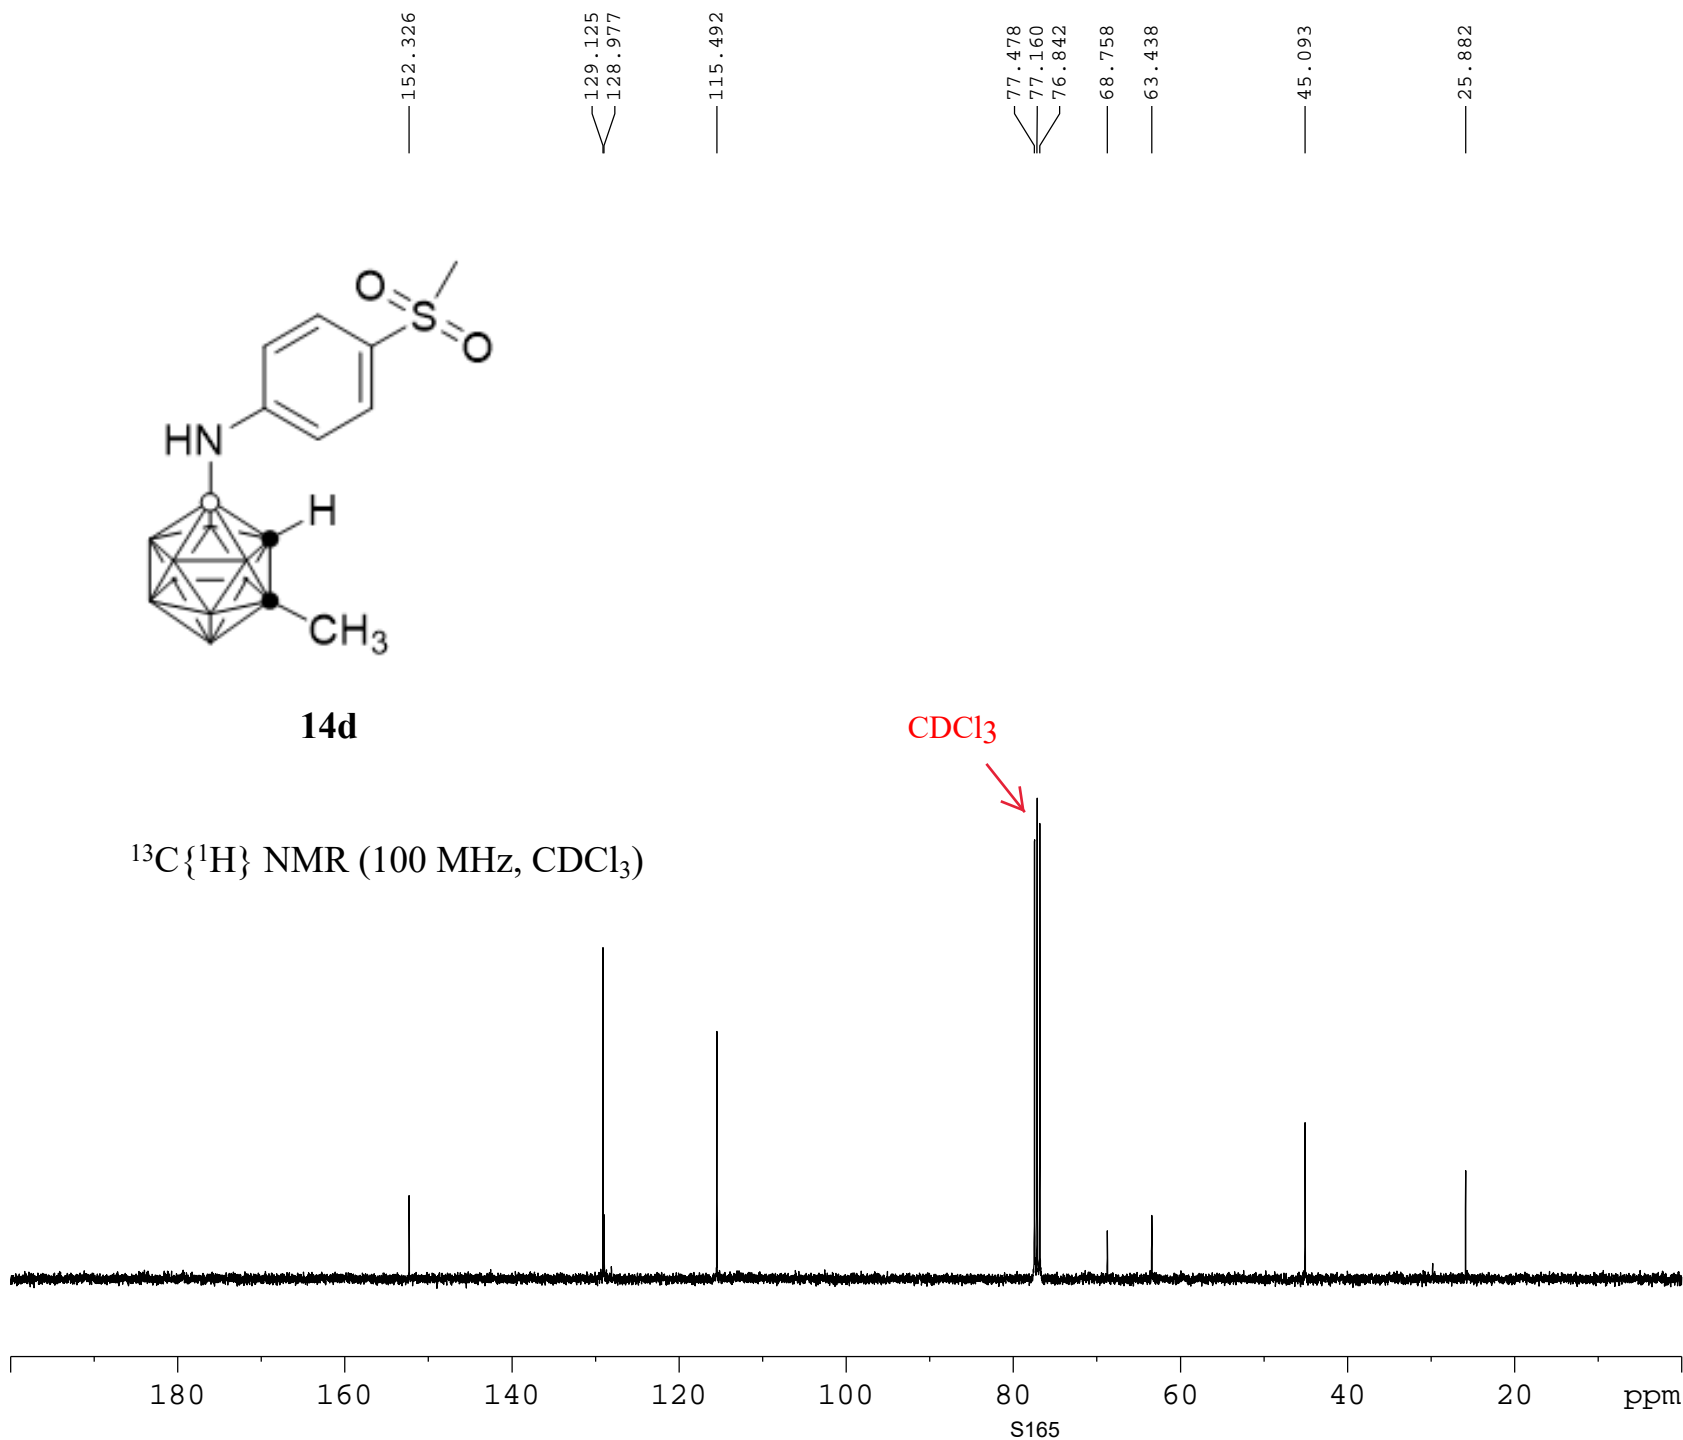

S165

1hr-B-0550-pnsoc-CDCl3

Current Data Parameters  
NAME 1hr-B-0550-pnsoc-CDCl3  
EXPNO 1  
PROCNO 1

F2 - Acquisition Parameters  
Date\_ 20161123  
Time 16.41 h  
INSTRUM spect  
PROBHD Z108618\_0257 (  
PULPROG zgdc  
TD 65536  
SOLVENT CDCl3  
NS 21  
DS 4  
SWH 24038.461 Hz  
FIDRES 0.366798 Hz  
AQ 1.3631488 sec  
RG 287  
DW 20.800 usec  
DE 6.50 usec  
TE 296.4 K  
D1 2.00000000 sec  
D11 0.03000000 sec  
TD0 1  
SFO1 128.4096890 MHz  
NUC1 11B  
P1 7.50 usec  
PLW1 55.09999847 W  
SFO2 400.2316009 MHz  
NUC2 1H  
CPDPRG[2] waltz16  
PCPD2 90.00 usec  
PLW2 13.56000042 W  
PLW12 0.27428001 W

F2 - Processing parameters  
SI 32768  
SF 128.4097615 MHz  
WDW EM  
SSB 0  
LB 1.00 Hz  
GB 0  
PC 1.40

— -1.74  
— -2.60  
— -7.11  
— -10.56  
— -11.67  
— -12.72  
— -16.90

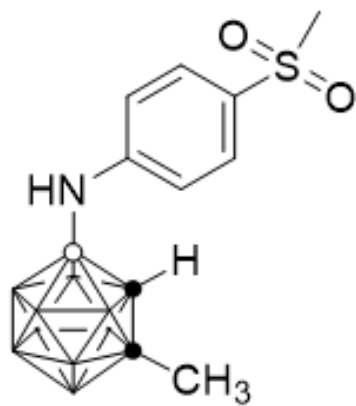

14d

$^{11}\text{B}\{^1\text{H}\}$  NMR (128 MHz,  $\text{CDCl}_3$ )

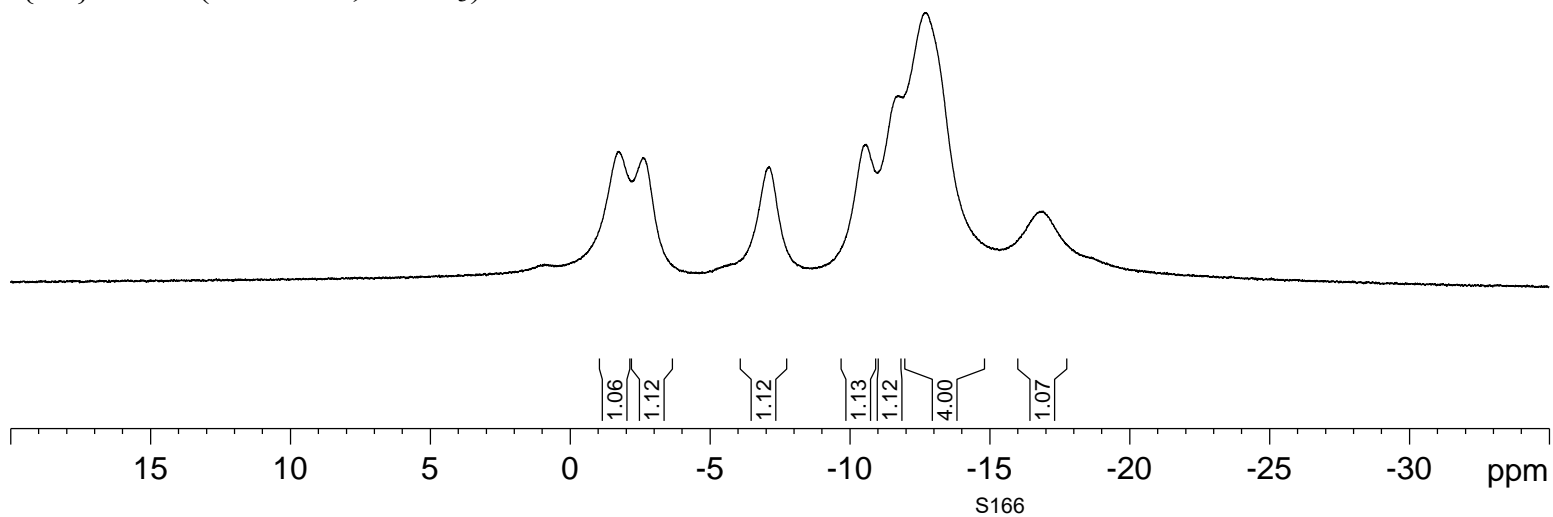

lhr-B-0550-pnsooc-CDCl3 (

Current Data Parameters  
NAME lhr-B-0550-pnsooc-CDCl3(C)  
EXPNO 1  
PROCNO 1

F2 - Acquisition Parameters  
Date\_ 20161123  
Time 16.44 h  
INSTRUM spect  
PROBHD Z108618\_0257 ( )  
PULPROG zg  
TD 65536  
SOLVENT CDCl3  
NS 30  
DS 2  
SWH 24038.461 Hz  
FIDRES 0.366798 Hz  
AQ 1.3631488 sec  
RG 287  
DW 20.800 usec  
DE 6.50 usec  
TE 296.0 K  
D1 2.00000000 sec  
TD0 1  
SF01 128.4096890 MHz  
NUC1 11B  
P1 7.50 usec  
PLW1 55.09999847 W

F2 - Processing parameters  
SI 32768  
SF 128.4097504 MHz  
WDW EM  
SSB 0  
LB 1.00 Hz  
GB 0  
PC 1.40

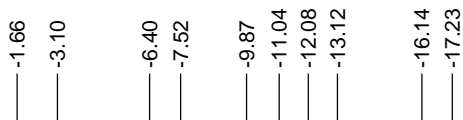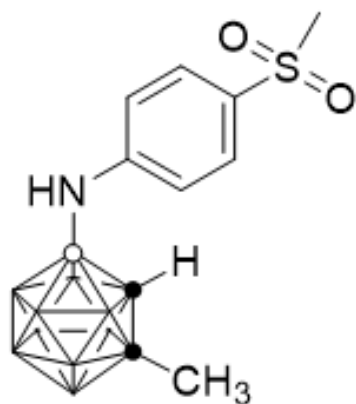

14d

$^{11}\text{B}$  NMR (128 MHz,  $\text{CDCl}_3$ )

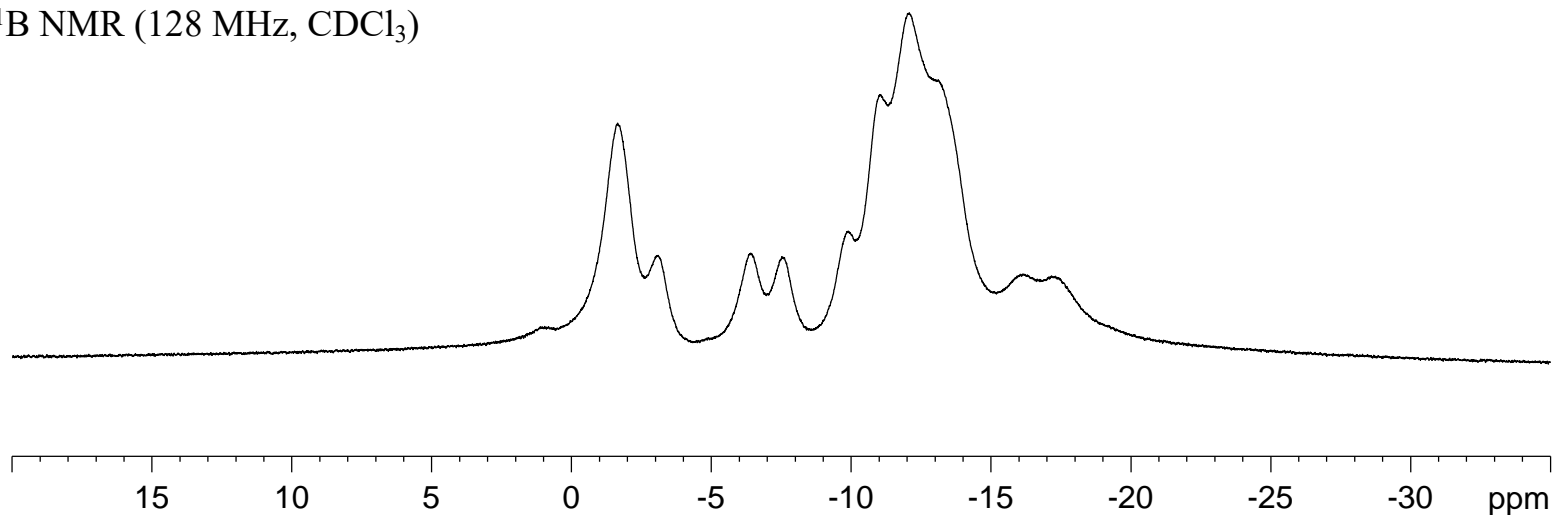

# Thermo QEFMS Analysis Report

## Analysis Info

|               |                                        |                |          |
|---------------|----------------------------------------|----------------|----------|
| Sample Name : | Lhr-550                                | Reference No.: | Qzwx069  |
| Instrument :  | Q Exactive Focus Orbitrap              |                |          |
| Source :      | HESI II                                | Polarity :     | Positive |
| Comment :     | ESI pos, 3.5kV, by LC, with sheath gas |                |          |

## Accurate Mass Measurement

|                                         |                                                                   |
|-----------------------------------------|-------------------------------------------------------------------|
| Molecular formula :                     | C <sub>10</sub> H <sub>21</sub> B <sub>10</sub> NO <sub>2</sub> S |
| Experimental Mass [M+Na] <sup>+</sup> : | 350.21845                                                         |
| Theoretical Mass [M+Na] <sup>+</sup> :  | 350.21890                                                         |
| Error (ppm) :                           | 1.2                                                               |

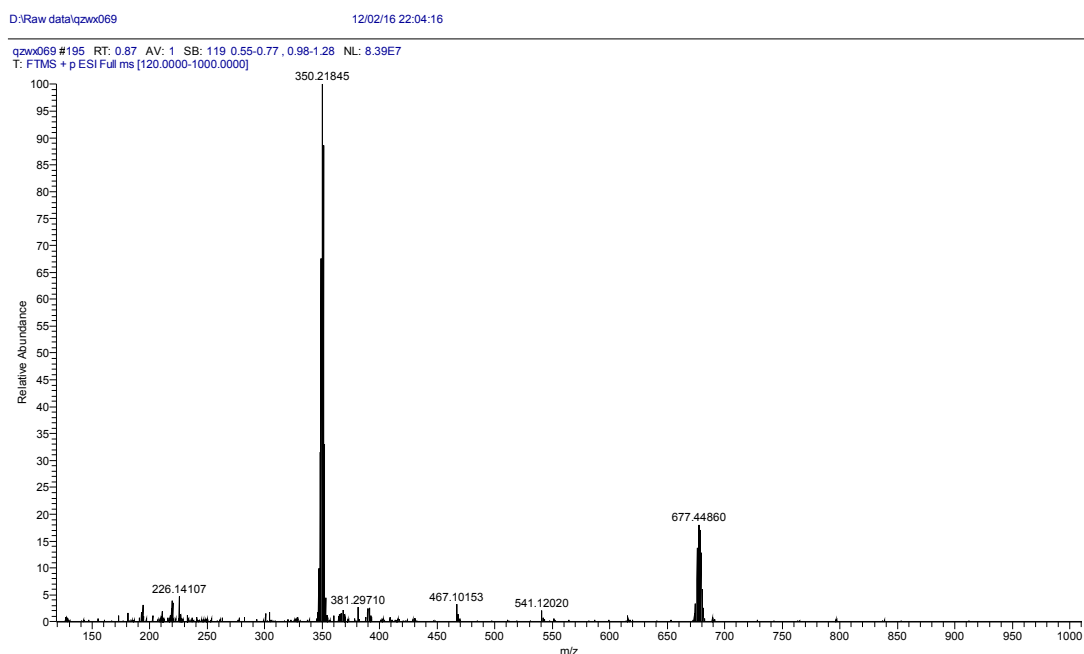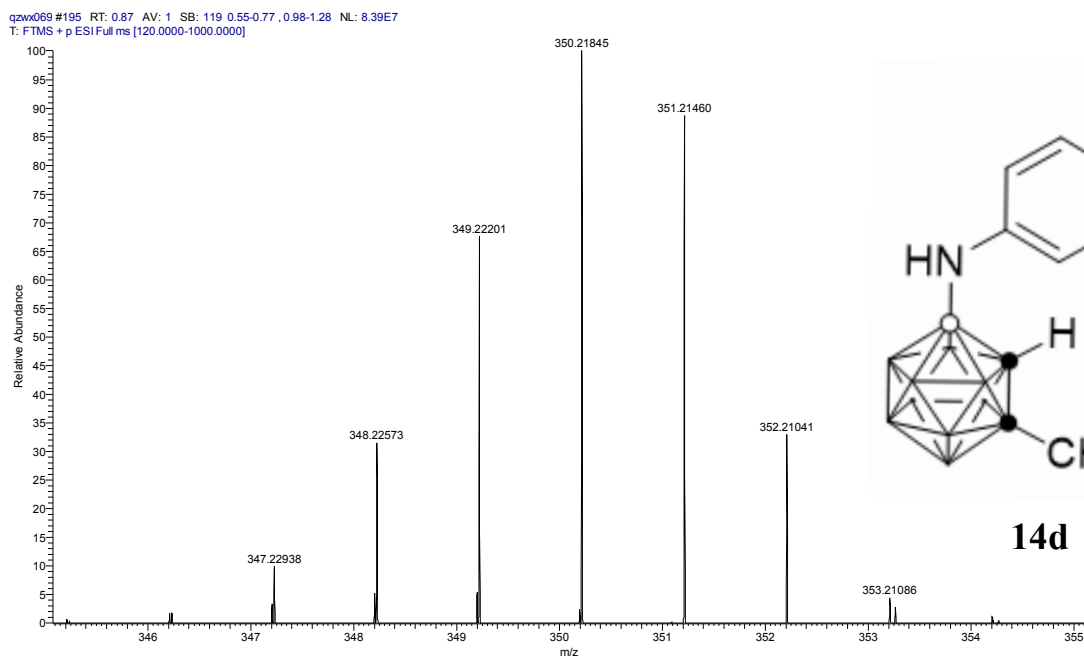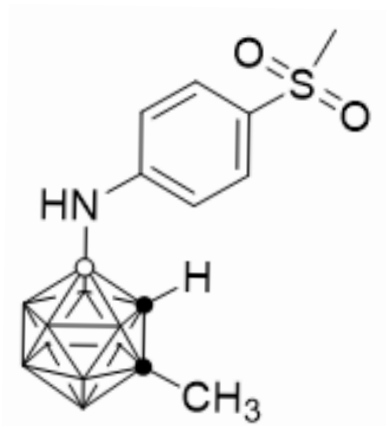

7.260  
7.202  
7.181  
7.163  
6.958  
6.939  
6.781  
6.763

3.941  
3.714

2.315  
2.296  
2.277  
2.258

1.559  
1.114  
1.095  
1.076

lhr-H-0522-Etphnh-CD

Current Data Parameters  
NAME lhr-H-0522-Etphnh-CD  
EXPNO 1  
PROCNO 1

F2 - Acquisition Parameters  
Date\_ 20161102  
Time 9.53 h  
INSTRUM spect  
PROBHD Z108618\_0257 (zg30)  
PULPROG zg30  
TD 65536  
SOLVENT CDCl3  
NS 10  
DS 2  
SWH 8012.820 Hz  
FIDRES 0.122266 Hz  
AQ 4.0894465 sec  
RG 90.5  
DW 62.400 usec  
DE 6.50 usec  
TE 295.9 K  
D1 1.00000000 sec  
TD0 1  
SFO1 400.2324714 MHz  
NUC1 1H  
P1 12.80 usec  
PLW1 13.56000042 W

F2 - Processing parameters  
SI 65536  
SF 400.2300110 MHz  
WDW EM  
SSB 0  
LB 0.30 Hz  
GB 0  
PC 1.00

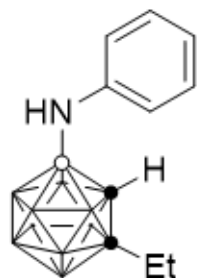

**15d**

<sup>1</sup>H NMR (400 MHz, CDCl<sub>3</sub>)

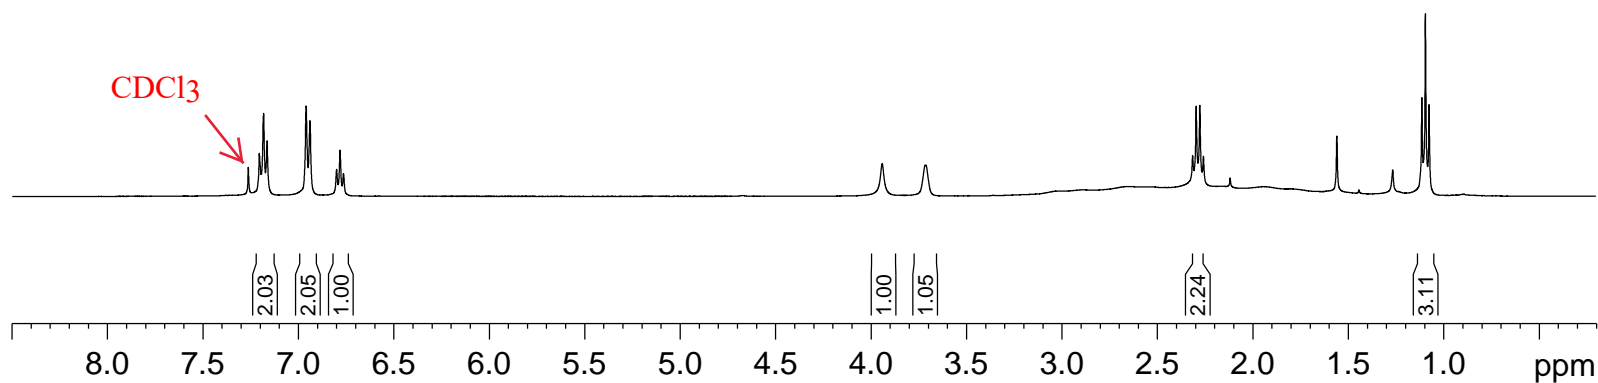

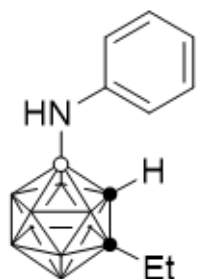

15d

$^{13}\text{C}\{^1\text{H}\}$  NMR (100 MHz,  $\text{CDCl}_3$ )

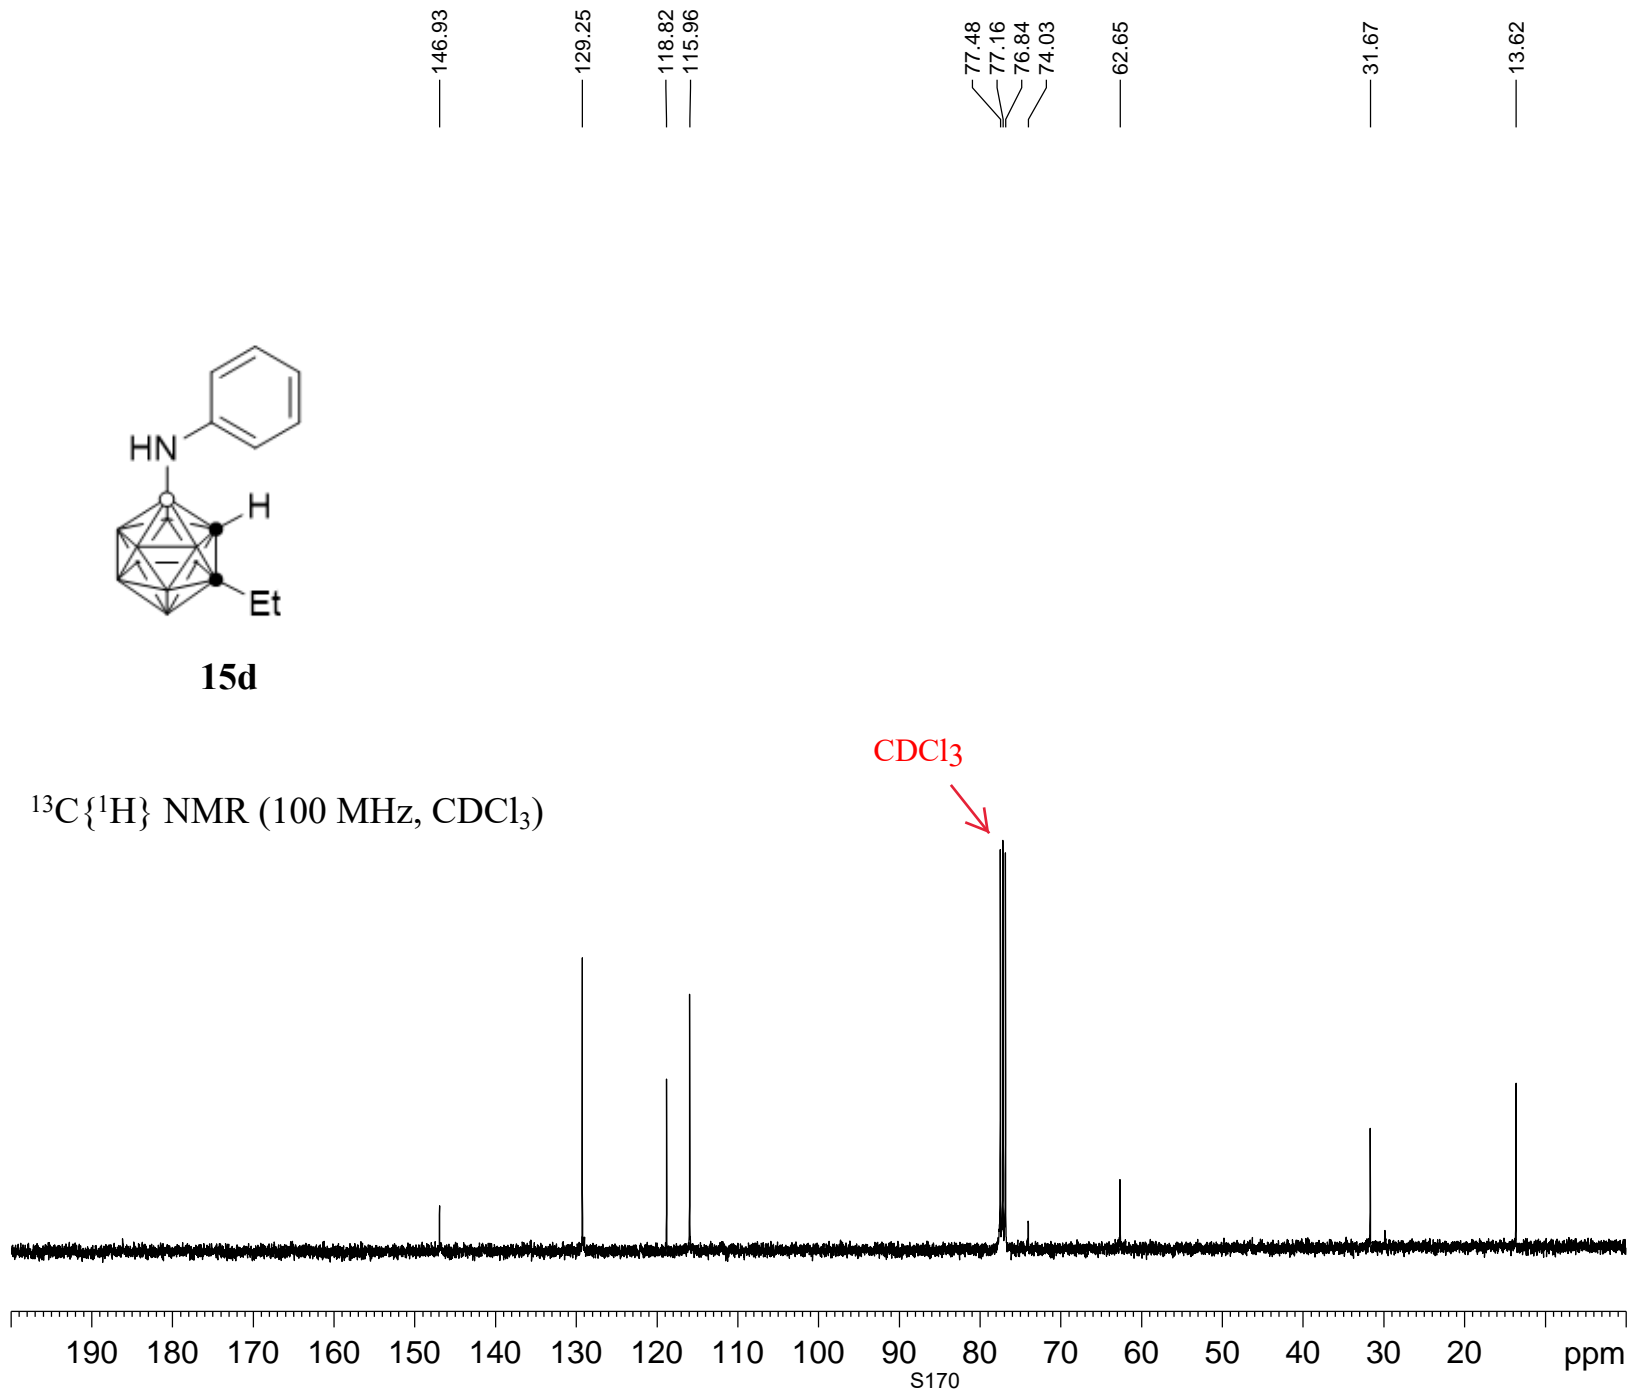

lhr-C-0522-Etphnh-(

Current Data Parameters  
 NAME lhr-C-0522-Etphnh-CDCl3  
 EXPNO 1  
 PROCNO 1

F2 - Acquisition Parameters

Date\_ 20161102  
 Time 9.56 h  
 INSTRUM spect  
 PROBHD Z108618\_0257 (  
 PULPROG zgpg30  
 TD 65536  
 SOLVENT CDCl3  
 NS 120  
 DS 4  
 SWH 29761.904 Hz  
 FIDRES 0.454131 Hz  
 AQ 1.1010048 sec  
 RG 161  
 DW 16.800 usec  
 DE 6.50 usec  
 TE 296.2 K  
 D1 2.00000000 sec  
 D11 0.03000000 sec  
 TD0 1  
 SFO1 100.6479773 MHz  
 NUC1 13C  
 P1 9.50 usec  
 PLW1 55.34000015 W  
 SFO2 400.2316009 MHz  
 NUC2 1H  
 CPDPRG[2] waltz16  
 PCPD2 90.00 usec  
 PLW2 13.56000042 W  
 PLW12 0.27428001 W  
 PLW13 0.13796000 W

F2 - Processing parameters

SI 32768  
 SF 100.6379029 MHz  
 WDW EM  
 SSB 0  
 LB 1.00 Hz  
 GB 0  
 PC 1.40

1hr-B-0522-Etphnh-CDCl3

Current Data Parameters  
NAME 1hr-B-0522-Etphnh-CDCl3  
EXPNO 1  
PROCNO 1

F2 - Acquisition Parameters  
Date\_ 20161102  
Time 9.43 h  
INSTRUM spect  
PROBHD Z108618\_0257 (  
PULPROG zgdc  
TD 65536  
SOLVENT CDCl3  
NS 12  
DS 4  
SWH 24038.461 Hz  
FIDRES 0.366798 Hz  
AQ 1.3631488 sec  
RG 287  
DW 20.800 usec  
DE 6.50 usec  
TE 296.4 K  
D1 2.00000000 sec  
D11 0.03000000 sec  
TD0 1  
SFO1 128.4096890 MHz  
NUC1 11B  
P1 7.50 usec  
PLW1 55.09999847 W  
SFO2 400.2316009 MHz  
NUC2 1H  
CPDPRG[2] waltz16  
PCPD2 90.00 usec  
PLW2 13.56000042 W  
PLW12 0.27428001 W

F2 - Processing parameters  
SI 32768  
SF 128.4097615 MHz  
WDW EM  
SSB 0  
LB 1.00 Hz  
GB 0  
PC 1.40

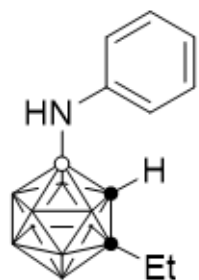

15d

$^{11}\text{B}\{^1\text{H}\}$  NMR (128 MHz,  $\text{CDCl}_3$ )

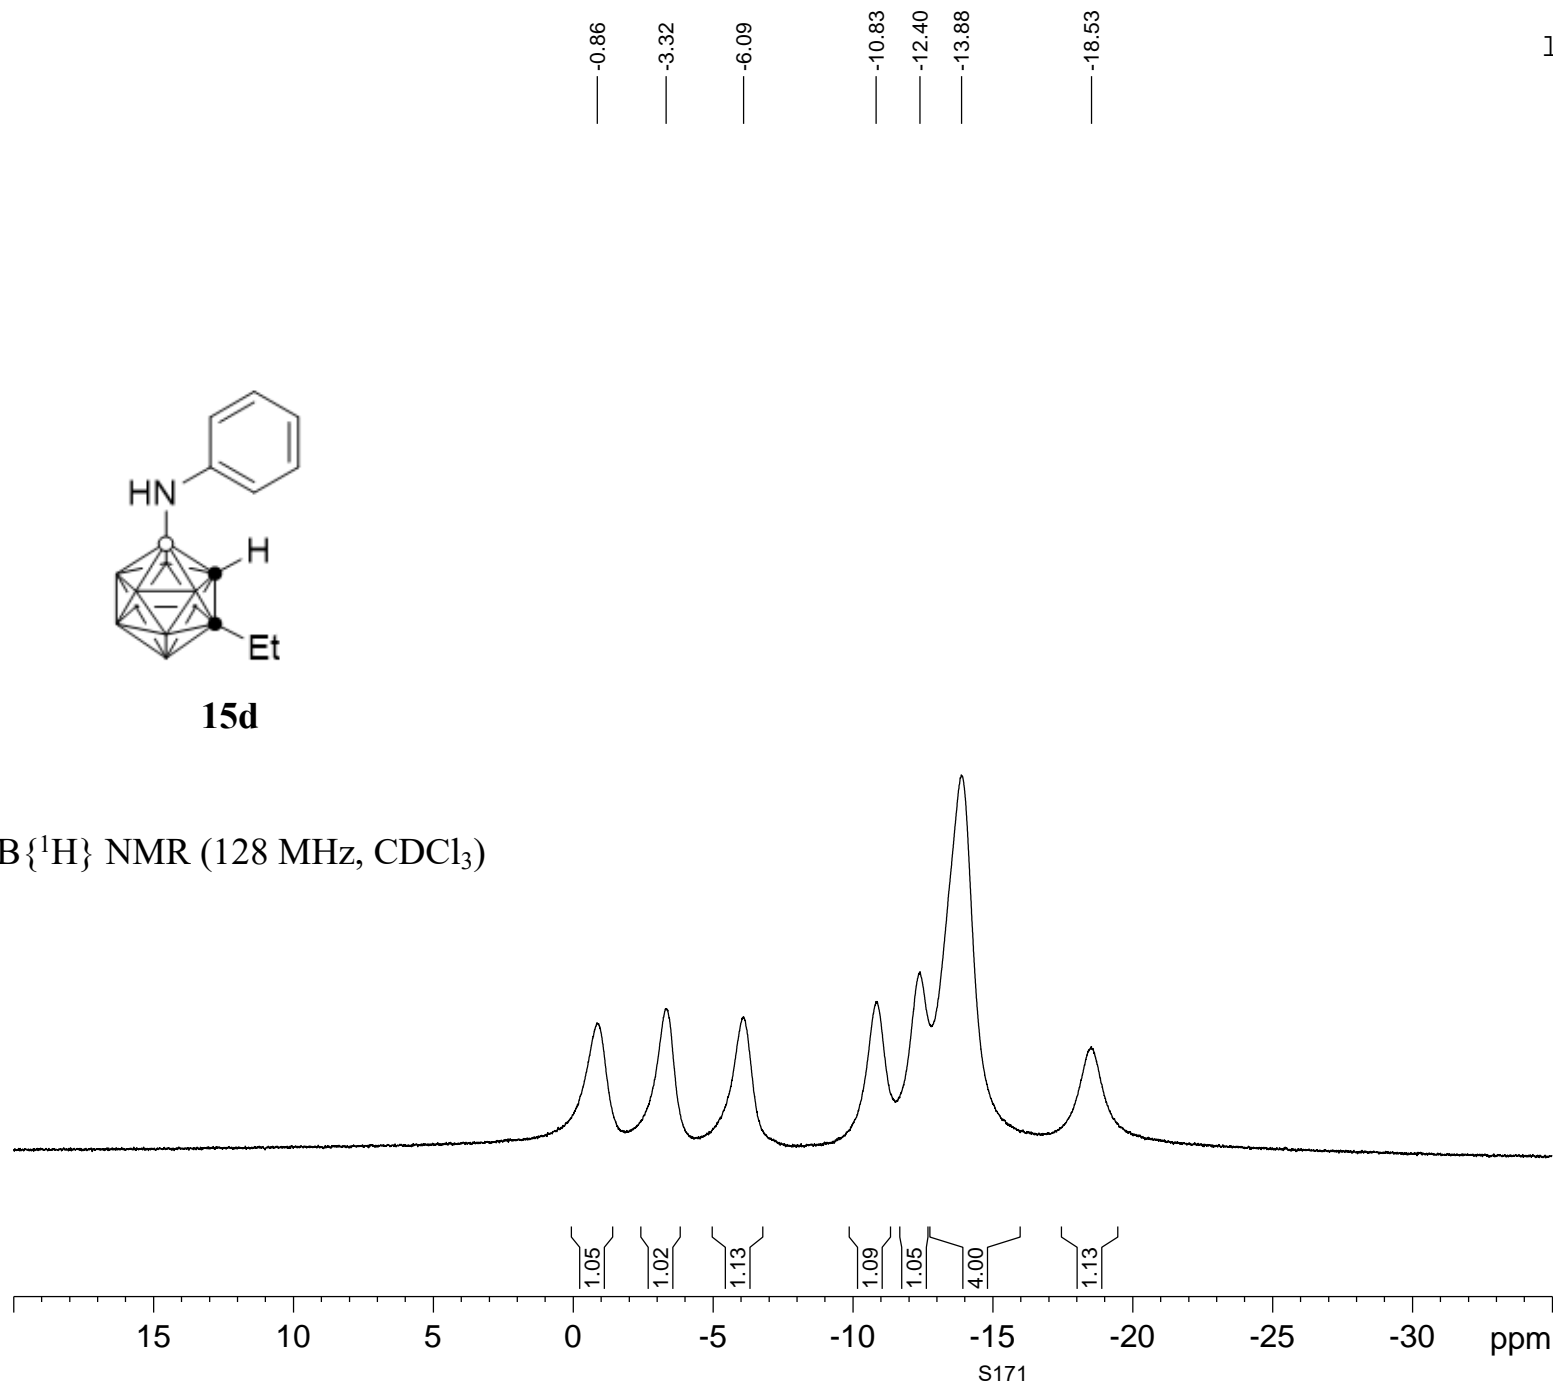

S171

lhr-B-0522-Etphnh-CDCl3(C)

Current Data Parameters  
NAME lhr-B-0522-Etphnh-CDCl3(C)  
EXPNO 1  
PROCNO 1

F2 - Acquisition Parameters  
Date\_ 20161102  
Time 9.45 h  
INSTRUM spect  
PROBHD Z108618\_0257 (  
PULPROG zg  
TD 65536  
SOLVENT CDCl3  
NS 14  
DS 2  
SWH 24038.461 Hz  
FIDRES 0.366798 Hz  
AQ 1.3631488 sec  
RG 287  
DW 20.800 usec  
DE 6.50 usec  
TE 296.2 K  
D1 2.0000000 sec  
TD0 1  
SFO1 128.4096890 MHz  
NUC1 11B  
P1 7.50 usec  
PLW1 55.09999847 W

F2 - Processing parameters  
SI 32768  
SF 128.4097504 MHz  
WDW EM  
SSB 0  
LB 1.00 Hz  
GB 0  
PC 1.40

— -0.78  
— -2.68  
— -3.77  
— -5.43  
— -6.56  
  
— -10.20  
— -11.53  
— -13.04  
— -14.45  
  
— -17.80  
— -19.09

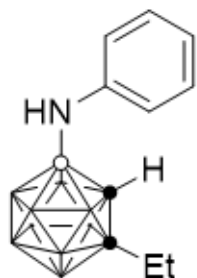

15d

<sup>11</sup>B NMR (128 MHz, CDCl<sub>3</sub>)

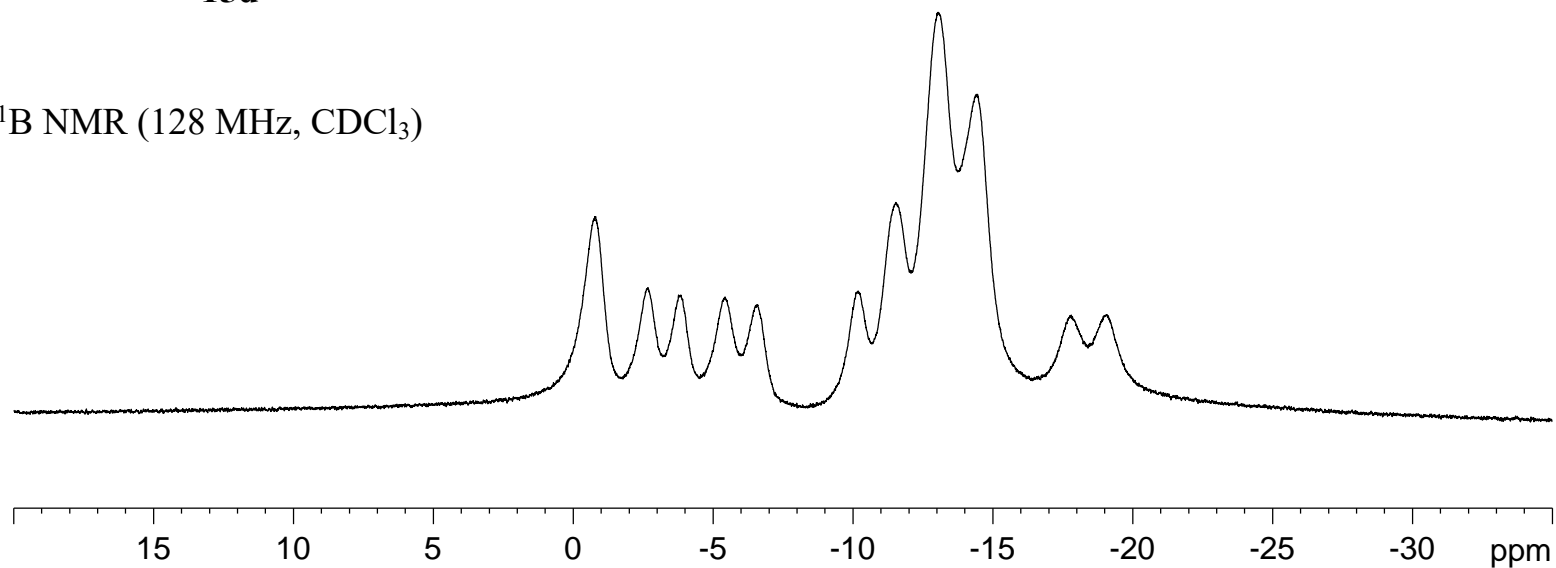



# Thermo QEFMS Analysis Report

## Analysis Info

|               |                                        |                |          |
|---------------|----------------------------------------|----------------|----------|
| Sample Name : | Lhr-522                                | Reference No.: | Qzwx062  |
| Instrument :  | Q Exactive Focus Orbitrap              |                |          |
| Source :      | HESI II                                | Polarity :     | Positive |
| Comment :     | ESI pos, 3.5kV, by LC, with sheath gas |                |          |

## Accurate Mass Measurement

|                                        |                                                   |
|----------------------------------------|---------------------------------------------------|
| Molecular formula :                    | C <sub>10</sub> H <sub>21</sub> B <sub>10</sub> N |
| Experimental Mass [M+H] <sup>+</sup> : | 264.27477                                         |
| Theoretical Mass [M+H] <sup>+</sup> :  | 264.27500                                         |
| Error (ppm) :                          | 0.8                                               |

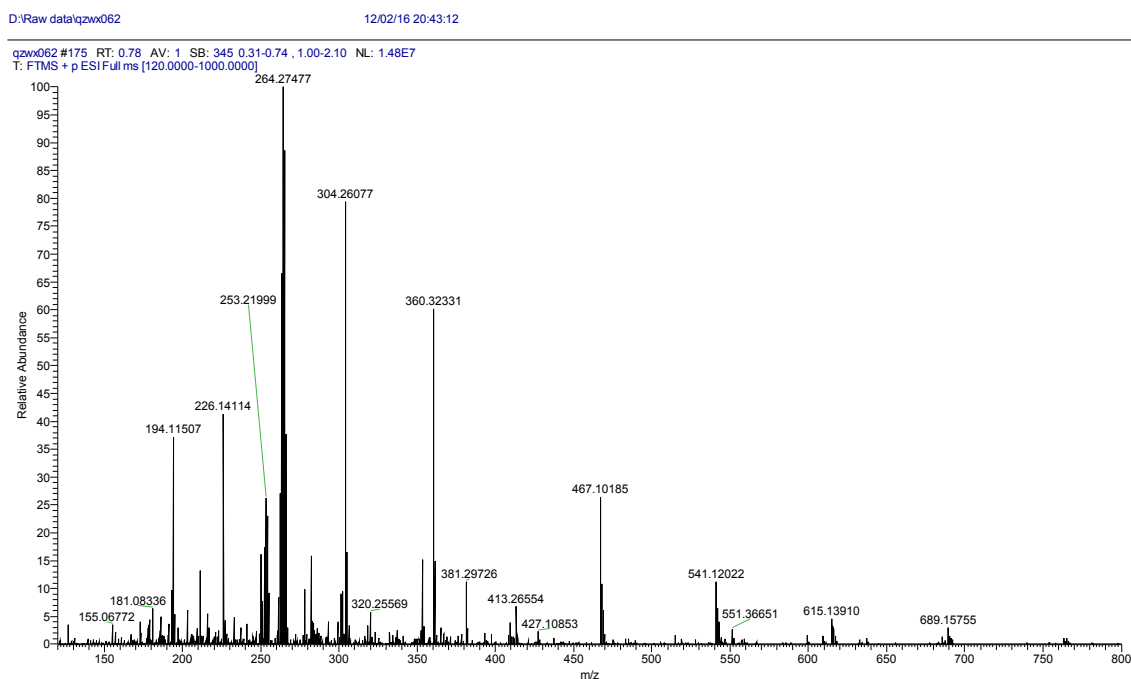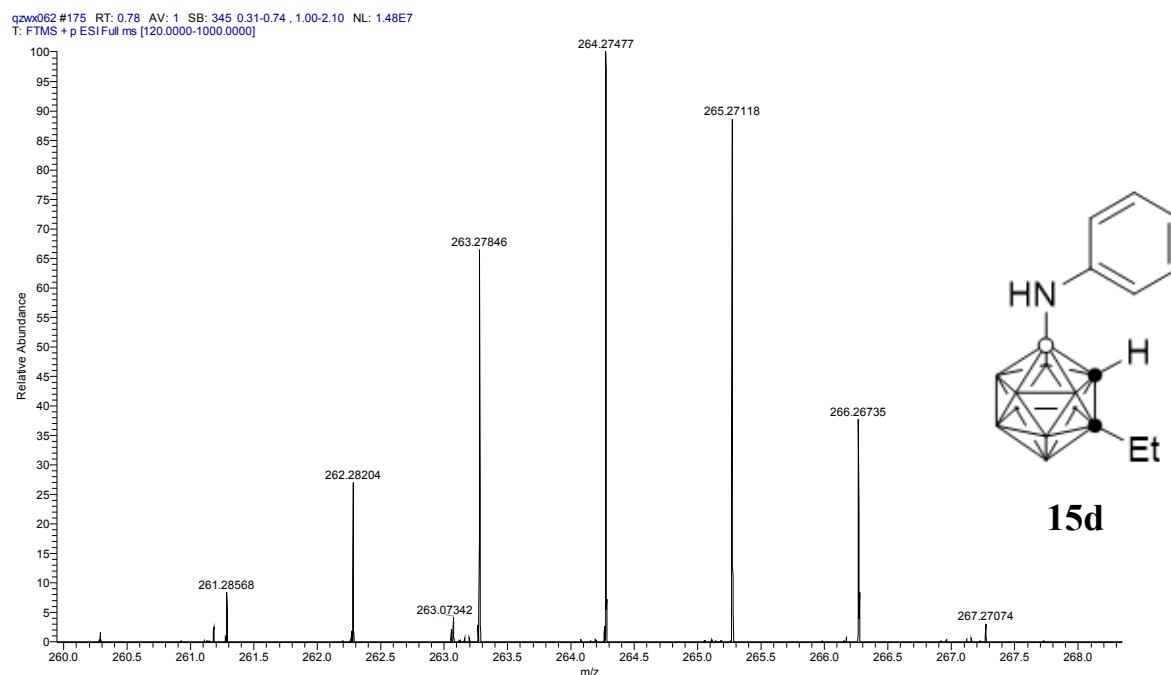

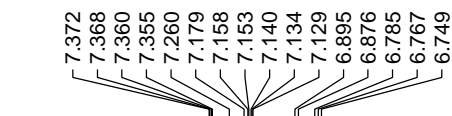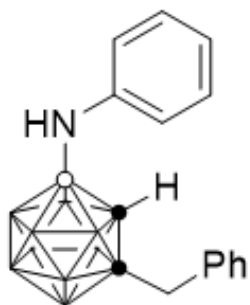

**16d**

<sup>1</sup>H NMR (400 MHz, CDCl<sub>3</sub>)

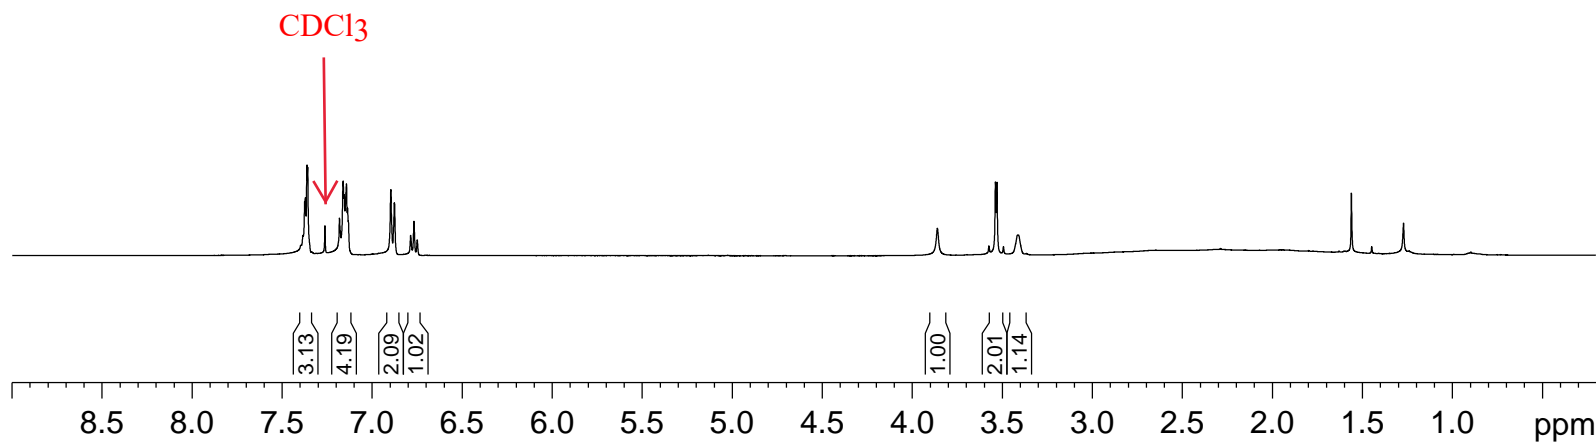

1hr-H-0541-2-Bnphnh

Current Data Parameters

NAME 1hr-H-0541-2-Bnphnh-CD  
 EXPNO 1  
 PROCNO 1

F2 - Acquisition Parameters

Date\_ 20161113  
 Time 19.37 h  
 INSTRUM spect  
 PROBHD Z108618\_0257 (  
 PULPROG zg30  
 TD 65536  
 SOLVENT CDCl3  
 NS 14  
 DS 2  
 SWH 8012.820 Hz  
 FIDRES 0.122266 Hz  
 AQ 4.0894465 sec  
 RG 64  
 DW 62.400 usec  
 DE 6.50 usec  
 TE 296.1 K  
 D1 1.00000000 sec  
 TD0 1  
 SFO1 400.2324714 MHz  
 NUC1 1H  
 P1 12.80 usec  
 PLW1 13.56000042 W

F2 - Processing parameters

SI 65536  
 SF 400.2300102 MHz  
 WDW EM  
 SSB 0  
 LB 0.30 Hz  
 GB 0  
 PC 1.00

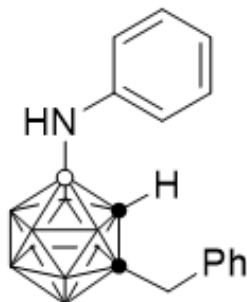

16d

$^{13}\text{C}\{^1\text{H}\}$  NMR (100 MHz,  $\text{CDCl}_3$ )

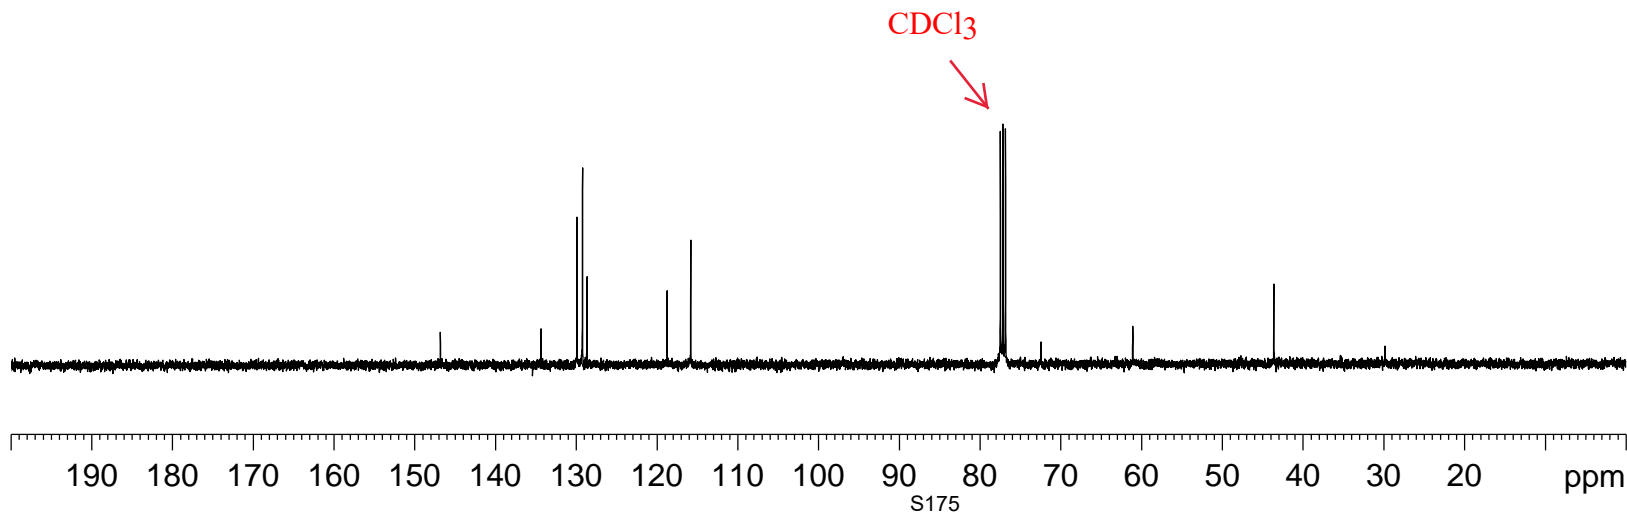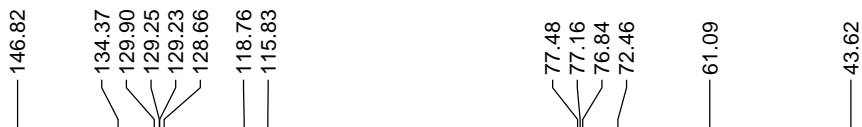

1hr-C-0541-2-Bnphnl

Current Data Parameters  
 NAME 1hr-C-0541-2-Bnphnh-CDCl  
 EXPNO 1  
 PROCNO 1

F2 - Acquisition Parameters

Date\_ 20161113  
 Time 19.42 h  
 INSTRUM spect  
 PROBHD Z108618\_0257 (  
 PULPROG zgpg30  
 TD 65536  
 SOLVENT CDCl3  
 NS 68  
 DS 4  
 SWH 29761.904 Hz  
 FIDRES 0.454131 Hz  
 AQ 1.1010048 sec  
 RG 181  
 DW 16.800 usec  
 DE 6.50 usec  
 TE 296.5 K  
 D1 2.00000000 sec  
 D11 0.03000000 sec  
 TD0 1  
 SFO1 100.6479773 MHz  
 NUC1 13C  
 P1 9.50 usec  
 PLW1 55.34000015 W  
 SFO2 400.2316009 MHz  
 NUC2 1H  
 CPDPRG12 waltz16  
 PCPD2 90.00 usec  
 PLW2 13.56000042 W  
 PLW12 0.27428001 W  
 PLW13 0.13796000 W

F2 - Processing parameters

SI 32768  
 SF 100.6379029 MHz  
 WDW EM  
 SSB 0  
 LB 1.00 Hz  
 GB 0  
 PC 1.40

1hr-B-0541-2-Bnphnh-CDC13

Current Data Parameters  
NAME 1hr-B-0541-2-Bnphnh-CDC13  
EXPNO 1  
PROCNO 1

F2 - Acquisition Parameters  
Date\_ 20161113  
Time 19.46 h  
INSTRUM spect  
PROBHD z108618\_0257 (  
PULPROG zgdc  
TD 65536  
SOLVENT CDC13  
NS 8  
DS 4  
SWH 24038.461 Hz  
FIDRES 0.366798 Hz  
AQ 1.3631488 sec  
RG 203  
DW 20.800 usec  
DE 6.50 usec  
TE 296.6 K  
D1 2.0000000 sec  
D11 0.0300000 sec  
TD0 1  
SFO1 128.4096890 MHz  
NUC1 11B  
P1 7.50 usec  
PLW1 55.09999847 W  
SFO2 400.2316009 MHz  
NUC2 1H  
CPDPRG[2] waltz16  
PCPD2 90.00 usec  
PLW2 13.56000042 W  
PLW12 0.27428001 W

F2 - Processing parameters  
SI 32768  
SF 128.4097615 MHz  
WDW EM  
SSB 0  
LB 1.00 Hz  
GB 0  
PC 1.40

-1.02  
-3.60  
-6.07  
-10.59  
-12.16  
-13.86  
-17.92

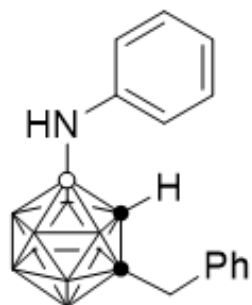

16d

$^{11}\text{B}\{^1\text{H}\}$  NMR (128 MHz,  $\text{CDCl}_3$ )

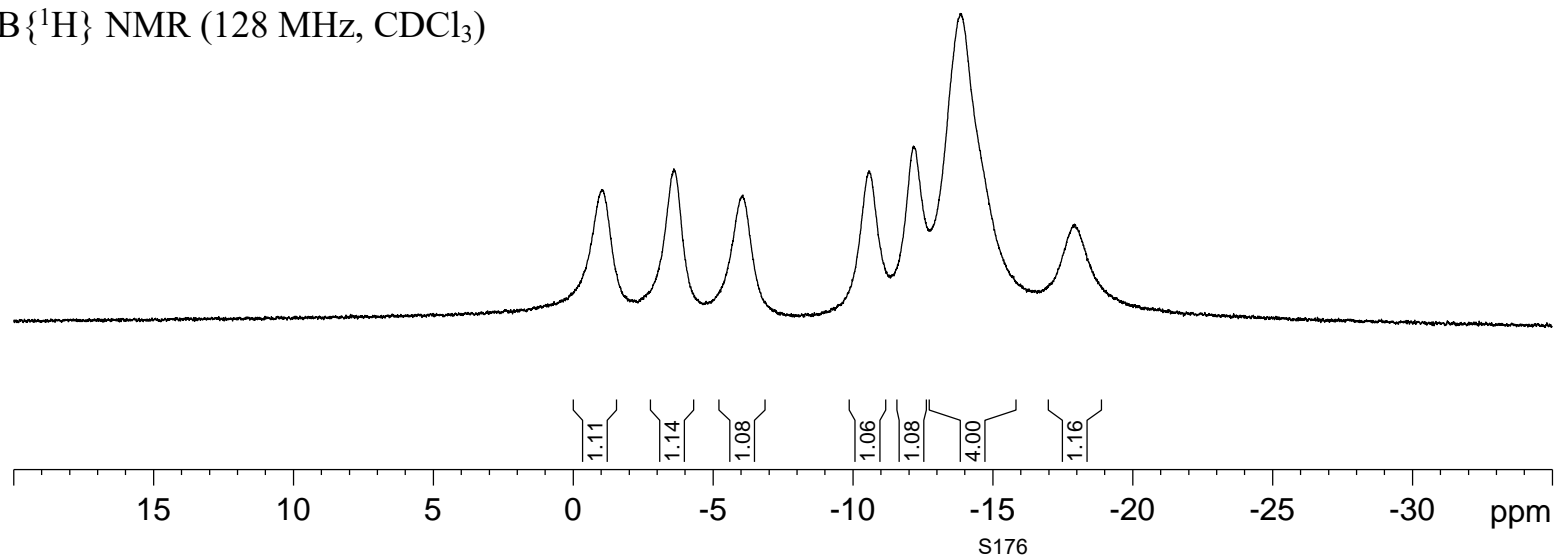

1hr-B-0541-2-Bnphnh-CDCl<sub>3</sub>(C)

Current Data Parameters  
NAME 1hr-B-0541-2-Bnphnh-CDCl<sub>3</sub>(C)  
EXPNO 1  
PROCNO 1

F2 - Acquisition Parameters  
Date\_ 20161113  
Time 19.48 h  
INSTRUM spect  
PROBHD Z108618\_0257 (   
PULPROG zg  
TD 65536  
SOLVENT CDCl<sub>3</sub>  
NS 16  
DS 2  
SWH 24038.461 Hz  
FIDRES 0.366798 Hz  
AQ 1.3631488 sec  
RG 203  
DW 20.800 usec  
DE 6.50 usec  
TE 296.2 K  
D1 2.00000000 sec  
TD0 1  
SFO1 128.4096890 MHz  
NUC1 11B  
P1 7.50 usec  
PLW1 55.09999847 W

F2 - Processing parameters  
SI 32768  
SF 128.4097504 MHz  
WDW EM  
SSB 0  
LB 1.00 Hz  
GB 0  
PC 1.40

— -0.94  
— -2.94  
— -4.09  
— -5.36  
— -6.49  
  
— -9.93  
— -11.35  
— -12.87  
— -14.29  
  
— -17.18  
— -18.39

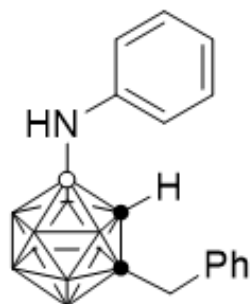

16d

<sup>11</sup>B NMR (128 MHz, CDCl<sub>3</sub>)

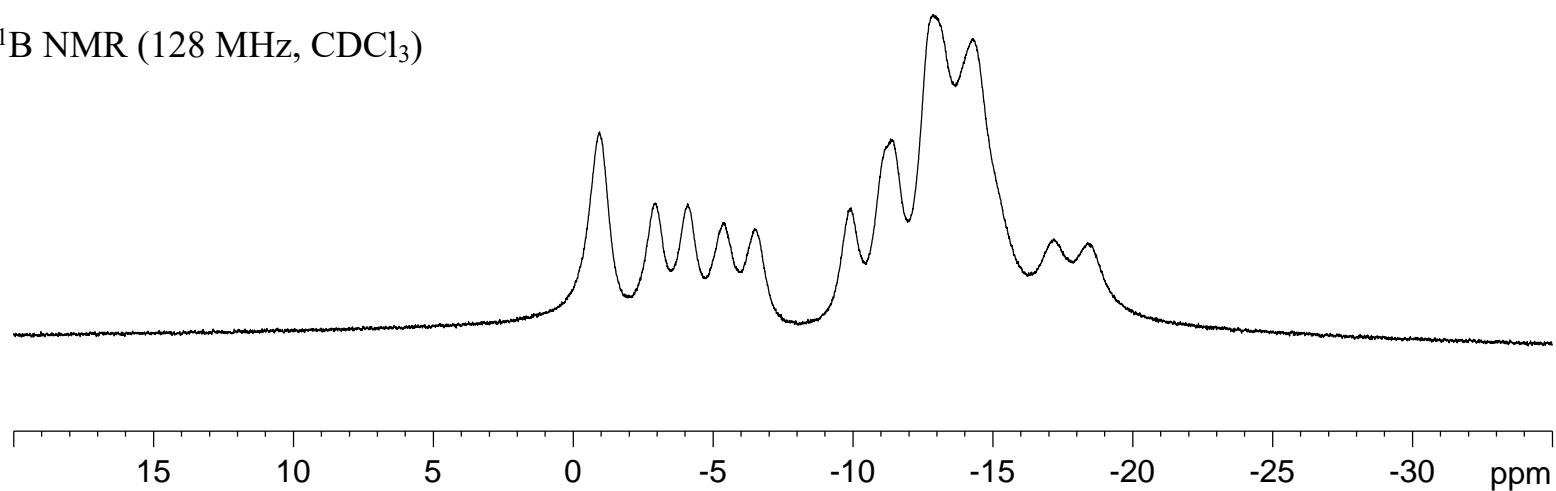

# Thermo QEFMS Analysis Report

## Analysis Info

|               |                                        |                |          |
|---------------|----------------------------------------|----------------|----------|
| Sample Name : | Lhr-541                                | Reference No.: | Qzwx066  |
| Instrument :  | Q Exactive Focus Orbitrap              |                |          |
| Source :      | HESI II                                | Polarity :     | Positive |
| Comment :     | ESI pos, 3.5kV, by LC, with sheath gas |                |          |

## Accurate Mass Measurement

|                                        |                                                   |
|----------------------------------------|---------------------------------------------------|
| Molecular formula :                    | C <sub>15</sub> H <sub>23</sub> B <sub>10</sub> N |
| Experimental Mass [M+H] <sup>+</sup> : | 326.29029                                         |
| Theoretical Mass [M+H] <sup>+</sup> :  | 326.29065                                         |
| Error (ppm) :                          | 1.1                                               |

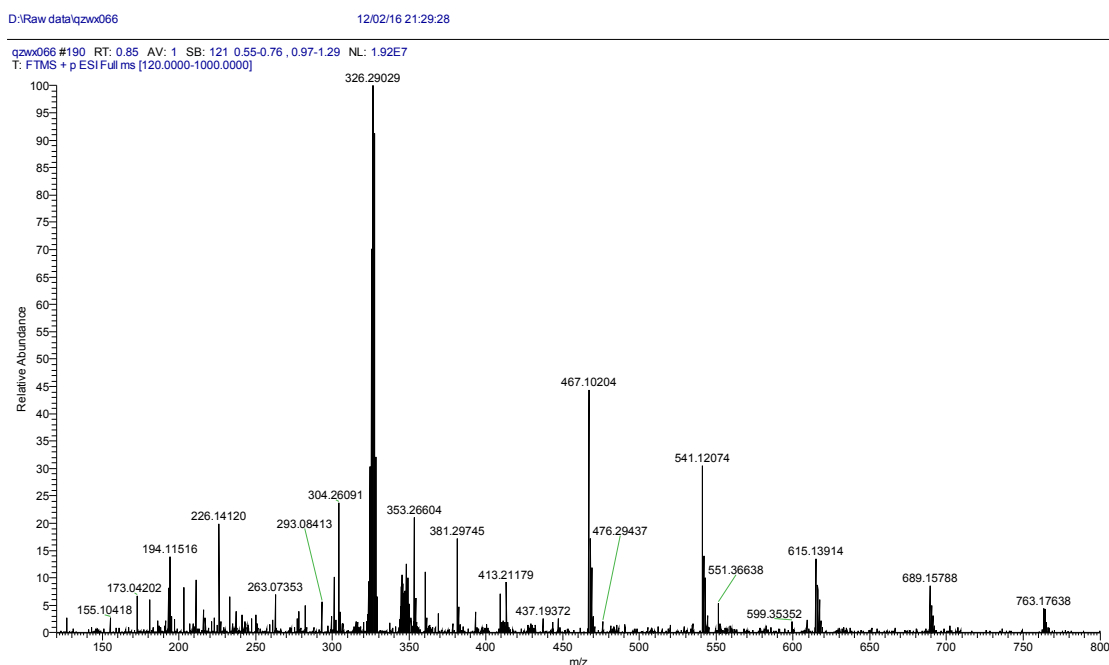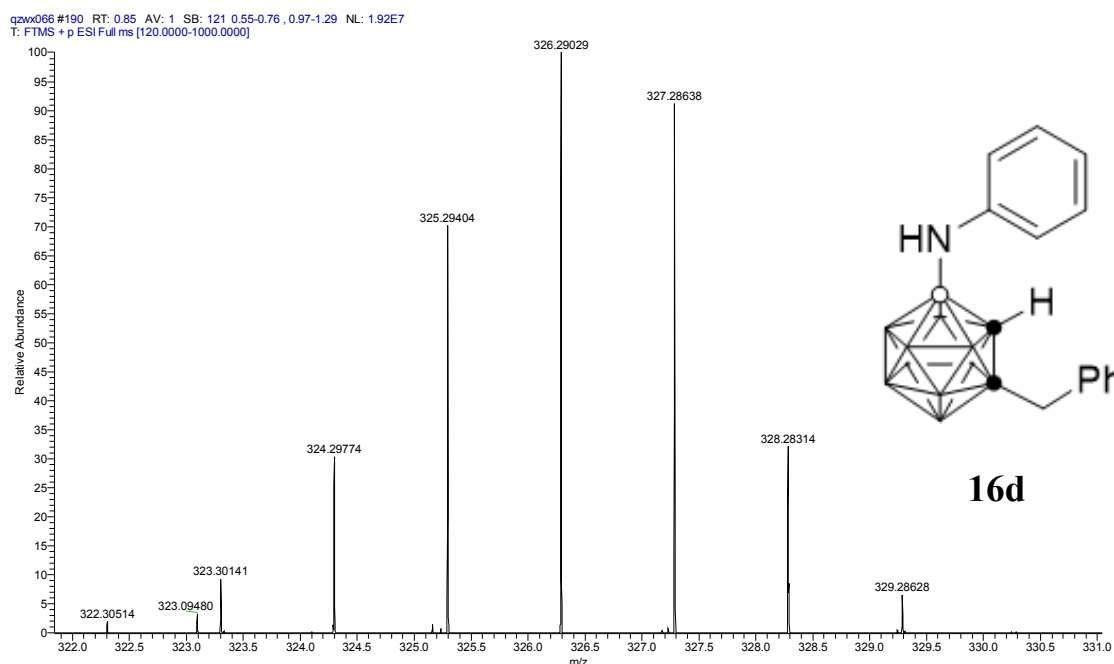

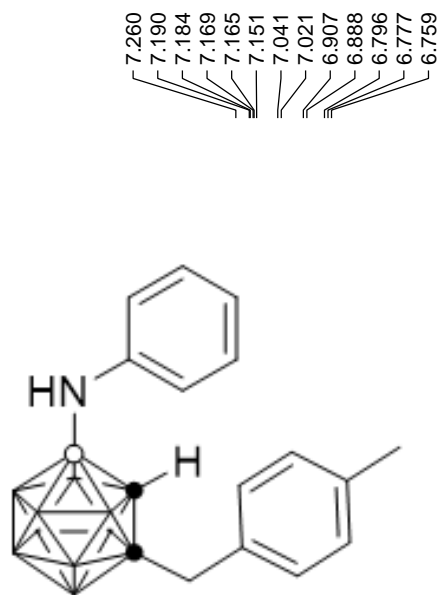

**17d**

<sup>1</sup>H NMR (400 MHz, CDCl<sub>3</sub>)

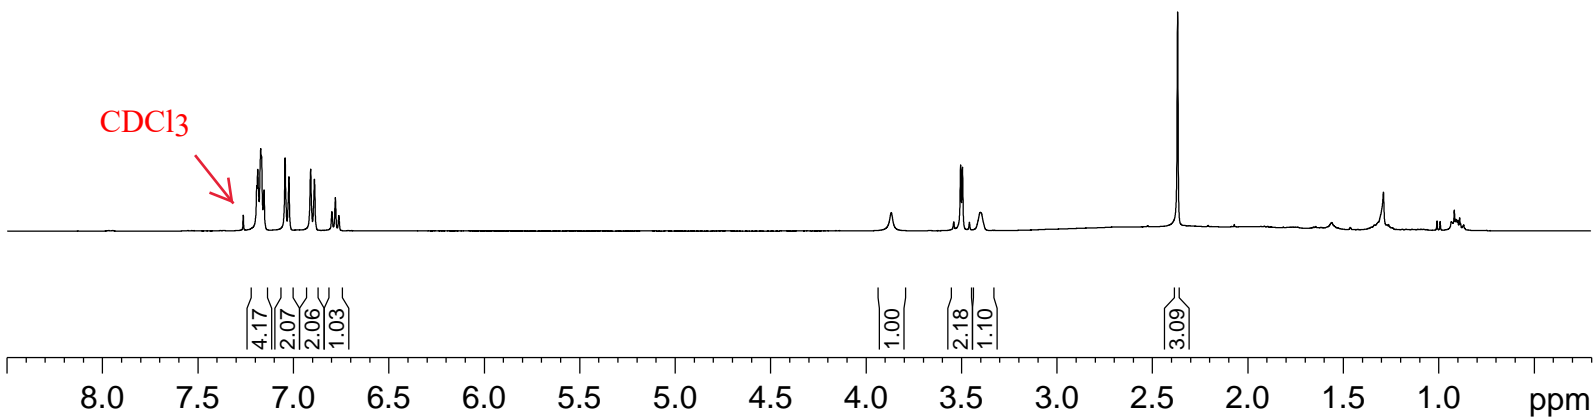

7.260  
7.190  
7.184  
7.169  
7.165  
7.151  
7.041  
7.021  
6.907  
6.888  
6.796  
6.777  
6.759

3.867  
3.540  
3.503  
3.494  
3.458  
3.401

2.367

1hr-H-0527-Bnch3phnh

Current Data Parameters

NAME 1hr-H-0527-Bnch3phnh-Cl  
EXPNO 1  
PROCNO 1

F2 - Acquisition Parameters

Date\_ 20161103  
Time\_ 17.06 h  
INSTRUM spect  
PROBHD Z108618\_0257 (  
PULPROG zg30  
TD 65536  
SOLVENT CDCl3  
NS 9  
DS 2  
SWH 8012.820 Hz  
FIDRES 0.122266 Hz  
AQ 4.0894465 sec  
RG 36  
DW 62.400 usec  
DE 6.50 usec  
TE 295.8 K  
D1 1.0000000 sec  
TD0 1  
SFO1 400.2324714 MHz  
NUC1 1H  
P1 12.80 usec  
PLW1 13.56000042 W

F2 - Processing parameters

SI 65536  
SF 400.2300103 MHz  
WDW EM  
SSB 0  
LB 0.30 Hz  
GB 0  
PC 1.00

1hr-C-0527-Bnch3ph

Current Data Parameters  
NAME 1hr-C-0527-Bnch3phnh-CDC1  
EXPNO 1  
PROCNO 1

F2 - Acquisition Parameters  
Date\_ 20161103  
Time 17.10 h  
INSTRUM spect  
PROBHD Z108618\_0257 ( )  
PULPROG zgpg30  
TD 65536  
SOLVENT CDC13  
NS 36  
DS 4  
SWH 29761.904 Hz  
FIDRES 0.454131 Hz  
AQ 1.1010048 sec  
RG 161  
DW 16.800 usec  
DE 6.50 usec  
TE 296.2 K  
D1 2.00000000 sec  
D11 0.03000000 sec  
TD0 1  
SFO1 100.6479773 MHz  
NUC1 13C  
P1 9.50 usec  
PLW1 55.34000015 W  
SFO2 400.2316009 MHz  
NUC2 1H  
CPDPRG[2] waltz16  
PCPD2 90.00 usec  
PLW2 13.56000042 W  
PLW12 0.27428001 W  
PLW13 0.13796000 W

F2 - Processing parameters  
SI 32768  
SF 100.6379056 MHz  
WDW EM  
SSB 0  
LB 1.00 Hz  
GB 0  
PC 1.40

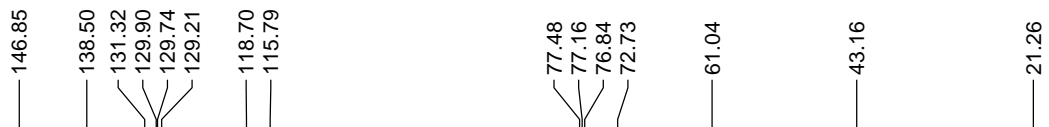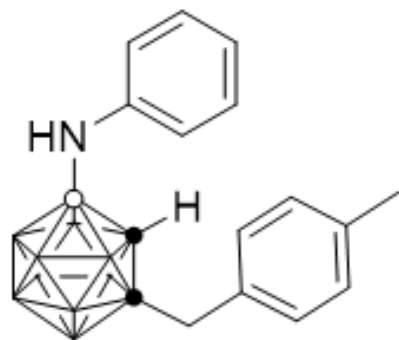

17d

$^{13}\text{C}\{^1\text{H}\}$  NMR (100 MHz,  $\text{CDCl}_3$ )

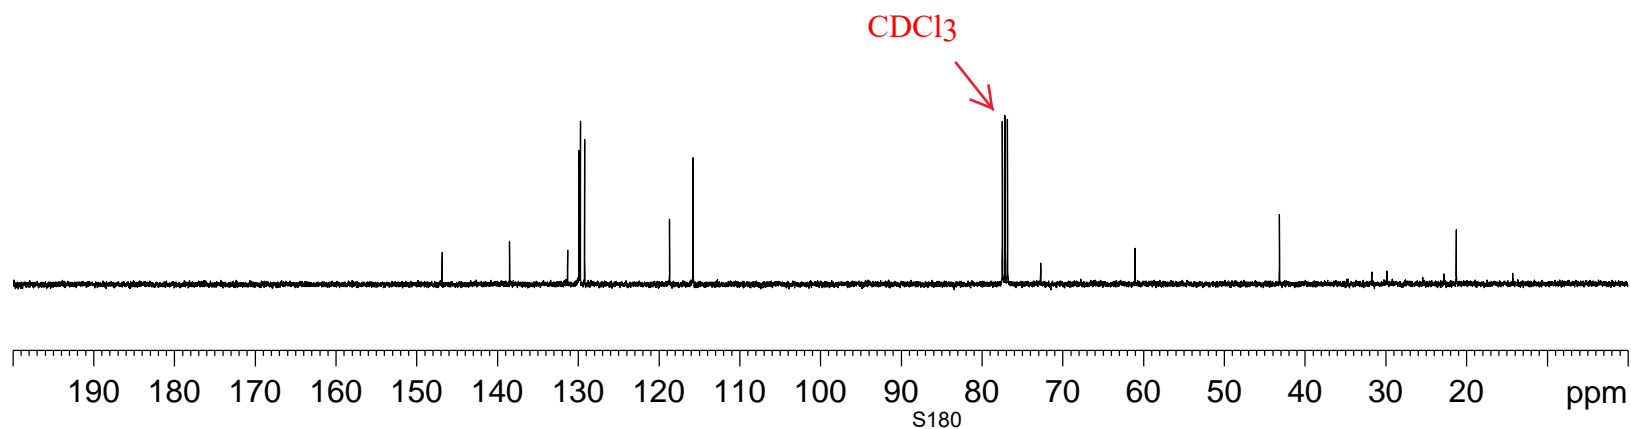



1hr-B-0527-Bnch3phnh-CDC

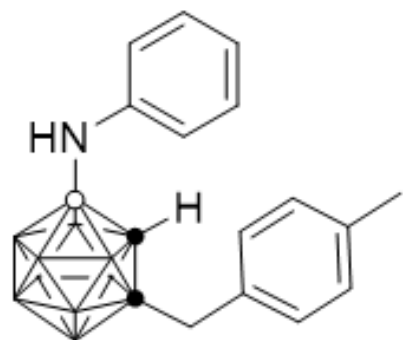

17d

$^{11}\text{B}\{^1\text{H}\}$  NMR (128 MHz,  $\text{CDCl}_3$ )

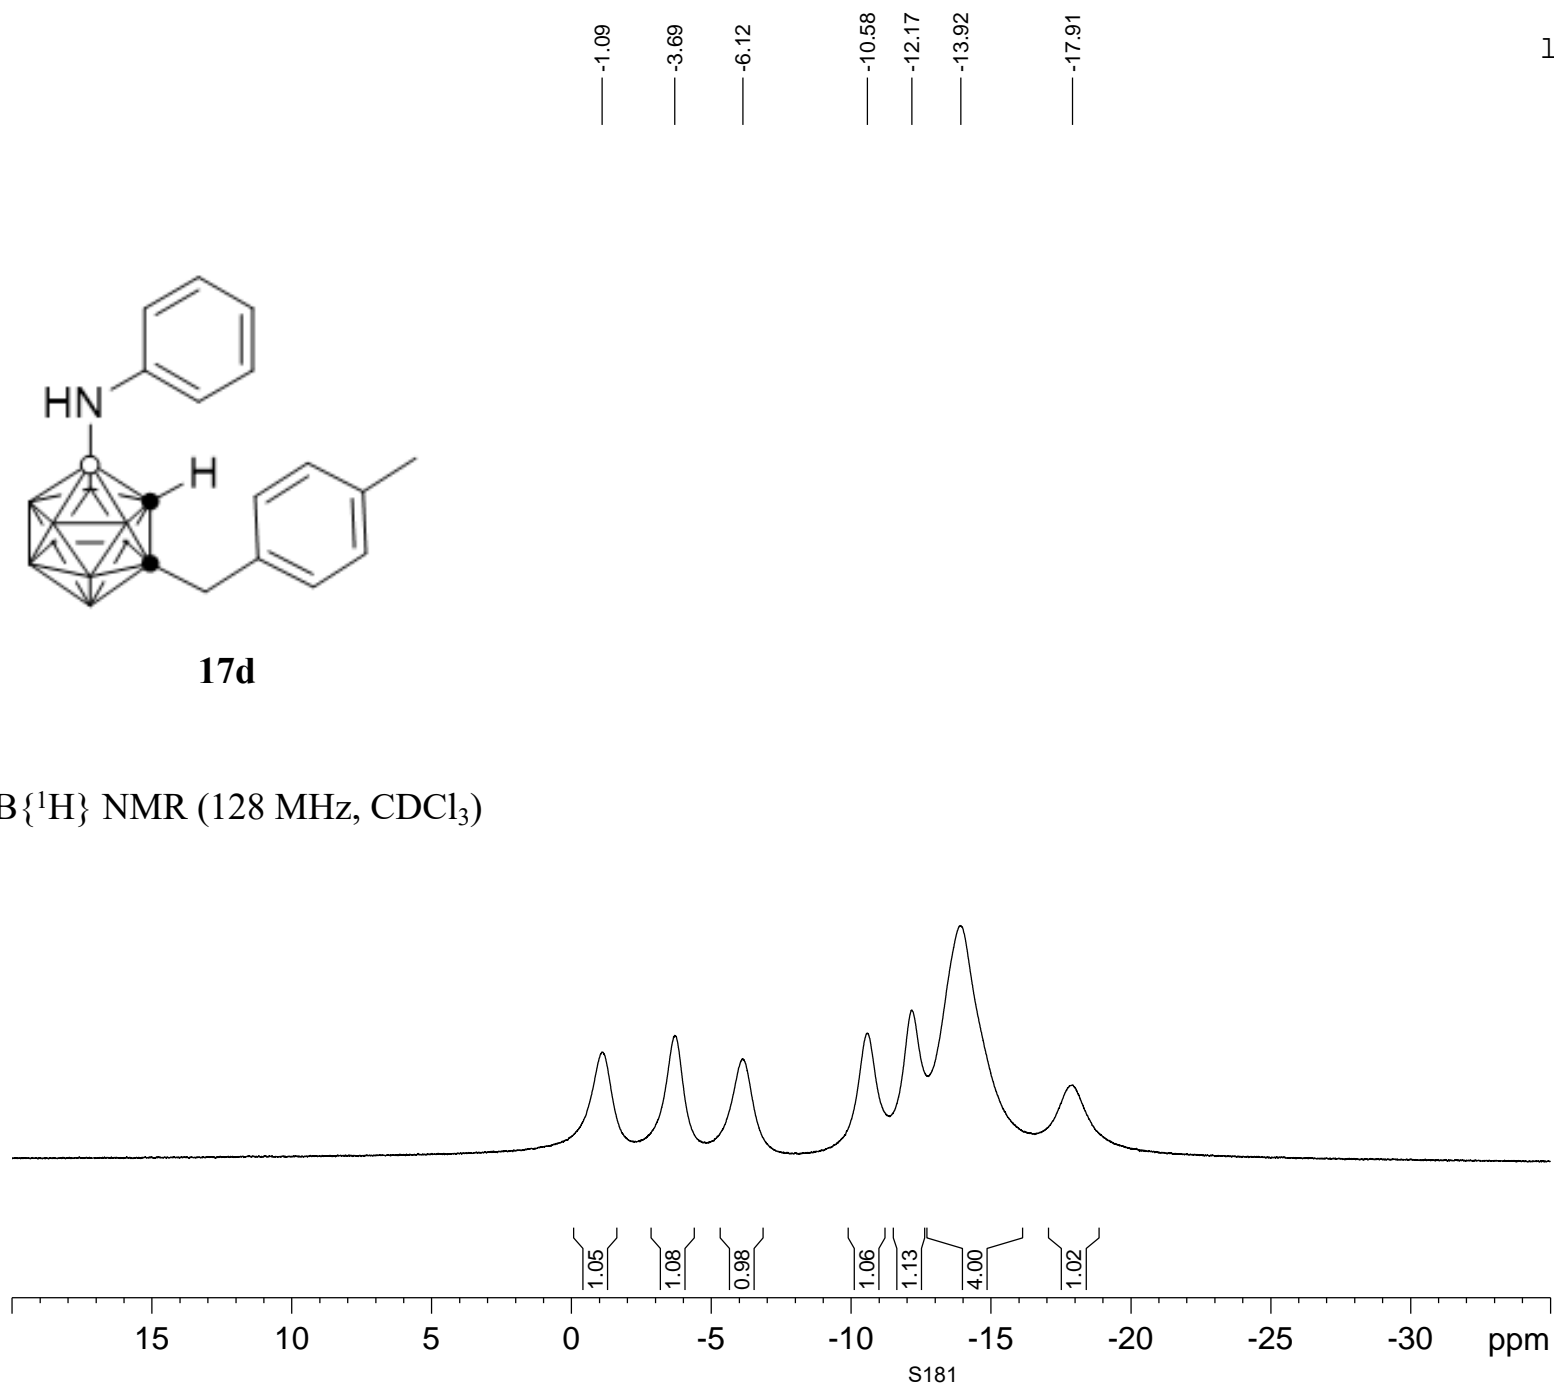

Current Data Parameters  
NAME 1hr-B-0527-Bnch3phnh-CDC13  
EXPNO 1  
PROCNO 1

F2 - Acquisition Parameters  
Date\_ 20161103  
Time 17.13 h  
INSTRUM spect  
PROBHD Z108618\_0257 (  
PULPROG zgdc  
TD 65536  
SOLVENT  $\text{CDCl}_3$   
NS 12  
DS 4  
SWH 24038.461 Hz  
FIDRES 0.366798 Hz  
AQ 1.3631488 sec  
RG 203  
DW 20.800 usec  
DE 6.50 usec  
TE 296.3 K  
D1 2.00000000 sec  
D11 0.03000000 sec  
TD0 1  
SFO1 128.4096890 MHz  
NUC1  $^{11}\text{B}$   
P1 7.50 usec  
PLW1 55.09999847 W  
SFO2 400.2316009 MHz  
NUC2  $^1\text{H}$   
CPDPRG[2] waltz16  
PCPD2 90.00 usec  
PLW2 13.56000042 W  
PLW12 0.27428001 W

F2 - Processing parameters  
SI 32768  
SF 128.4097615 MHz  
WDW EM  
SSB 0  
LB 1.00 Hz  
GB 0  
PC 1.40

1hr-B-0527-Bnch3phnh-CDCl<sub>3</sub>

Current Data Parameters  
NAME 1hr-B-0527-Bnch3phnh-CDCl<sub>3</sub>(C)  
EXPNO 1  
PROCNO 1

F2 - Acquisition Parameters  
Date\_ 20161103  
Time 17.15 h  
INSTRUM spect  
PROBHD z108618\_0257 (z)  
PULPROG zg  
TD 65536  
SOLVENT CDCl<sub>3</sub>  
NS 20  
DS 2  
SWH 24038.461 Hz  
FIDRES 0.366798 Hz  
AQ 1.3631488 sec  
RG 203  
DW 20.800 usec  
DE 6.50 usec  
TE 296.0 K  
D1 2.0000000 sec  
TD0 1  
SFO1 128.4096890 MHz  
NUC1 11B  
P1 7.50 usec  
PLW1 55.09999847 W

F2 - Processing parameters  
SI 32768  
SF 128.4097504 MHz  
WDW EM  
SSB 0  
LB 1.00 Hz  
GB 0  
PC 1.40

— -0.99  
— -3.01  
— -4.16  
— -5.42  
— -6.60  
  
— -9.89  
— -11.36  
— -12.83  
— -14.32  
  
— -17.12  
— -18.33

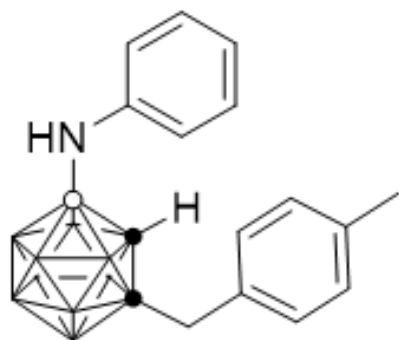

**17d**

<sup>11</sup>B NMR (128 MHz, CDCl<sub>3</sub>)

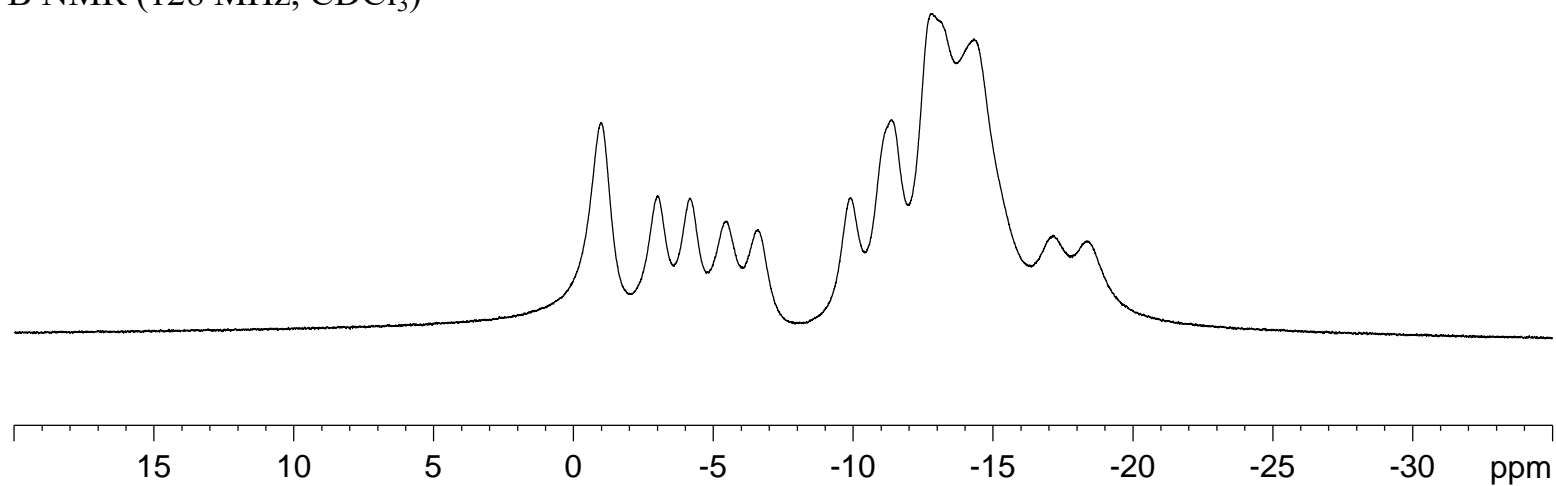

# Thermo QEFMS Analysis Report

## Analysis Info

|               |                                        |                |          |
|---------------|----------------------------------------|----------------|----------|
| Sample Name : | Lhr-527                                | Reference No.: | Qzwx065  |
| Instrument :  | Q Exactive Focus Orbitrap              |                |          |
| Source :      | HESI II                                | Polarity :     | Positive |
| Comment :     | ESI pos, 3.5kV, by LC, with sheath gas |                |          |

## Accurate Mass Measurement

|                                        |                                                   |
|----------------------------------------|---------------------------------------------------|
| Molecular formula :                    | C <sub>16</sub> H <sub>25</sub> B <sub>10</sub> N |
| Experimental Mass [M+H] <sup>+</sup> : | 340.30571                                         |
| Theoretical Mass [M+H] <sup>+</sup> :  | 340.30630                                         |
| Error (ppm) :                          | 1.7                                               |

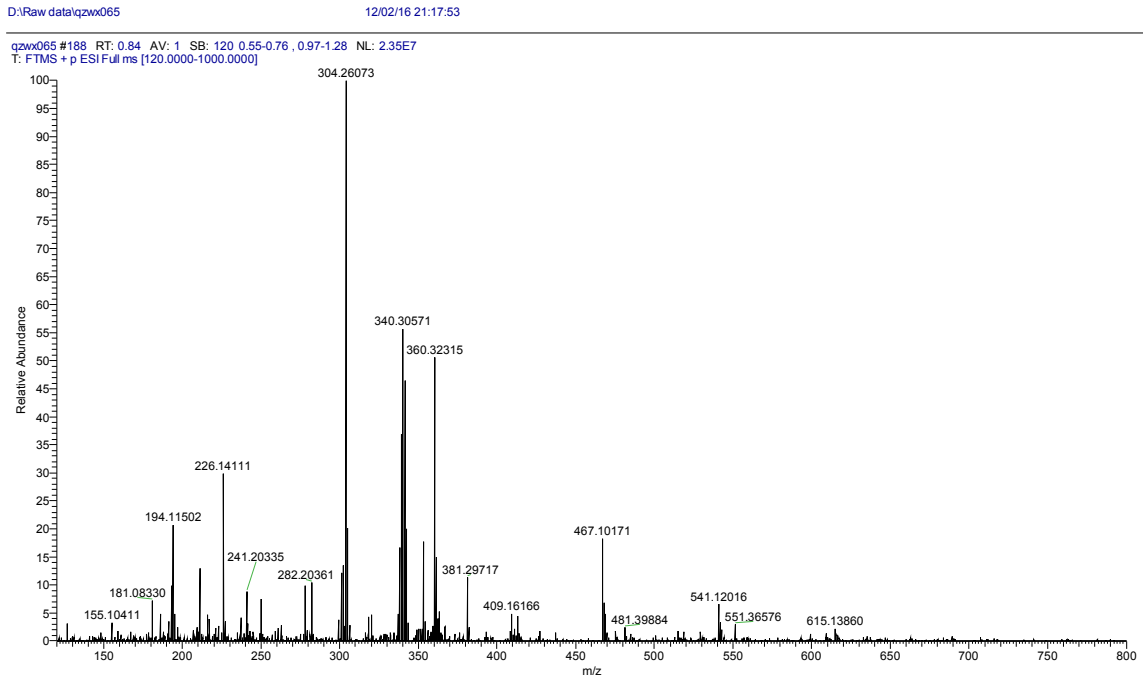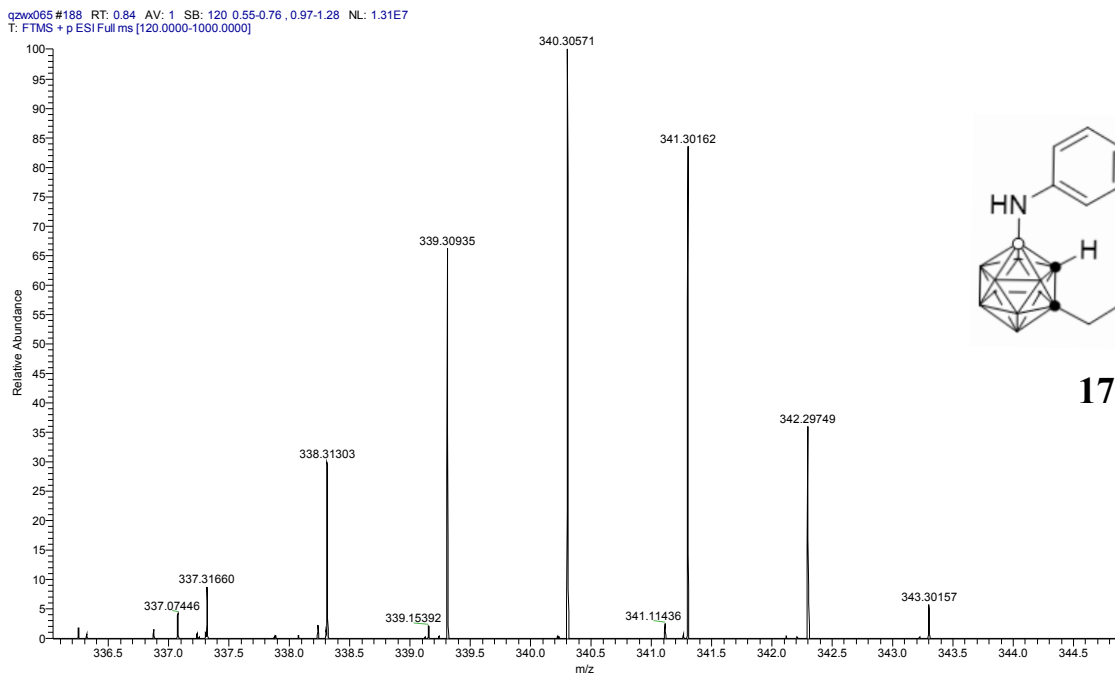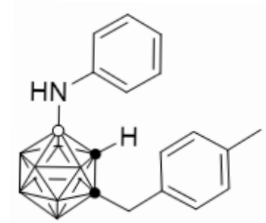

**17d**

7.260  
7.208  
7.187  
7.168  
6.980  
6.960  
6.798  
6.780  
6.761

3.977

3.523

0.246

lhr-H-0531-p1-TMSphr

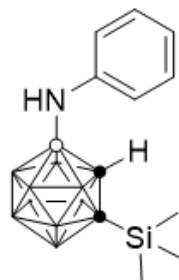

**18d**

<sup>1</sup>H NMR (400 MHz, CDCl<sub>3</sub>)

Current Data Parameters  
NAME lhr-H-0531-p1-TMSphr  
EXPNO 2  
PROCNO 1

F2 - Acquisition Parameters  
Date\_ 20161107  
Time 21.25 h  
INSTRUM spect  
PROBHD Z108618\_0257 (zg30)  
PULPROG zg30  
TD 65536  
SOLVENT CDCl3  
NS 12  
DS 2  
SWH 8012.820 Hz  
FIDRES 0.122266 Hz  
AQ 4.0894465 sec  
RG 45.2  
DW 62.400 usec  
DE 6.50 usec  
TE 295.9 K  
D1 1.00000000 sec  
TD0 1  
SFO1 400.2324714 MHz  
NUC1 1H  
P1 12.80 usec  
PLW1 13.56000042 W

F2 - Processing parameters  
SI 65536  
SF 400.2300106 MHz  
WDW EM  
SSB 0  
LB 0.30 Hz  
GB 0  
PC 1.00

CDCl<sub>3</sub>

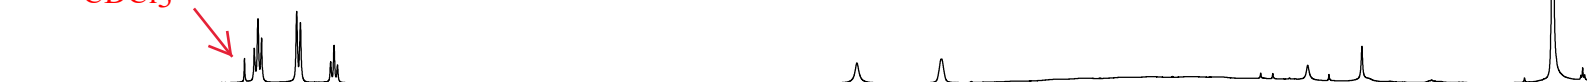

2.01  
2.06  
1.02

0.95

1.00

9.05

8.0 7.5 7.0 6.5 6.0 5.5 5.0 4.5 4.0 3.5 3.0 2.5 2.0 1.5 1.0 ppm

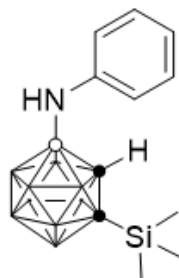

18d

$^{13}\text{C}\{^1\text{H}\}$  NMR (100 MHz,  $\text{CDCl}_3$ )

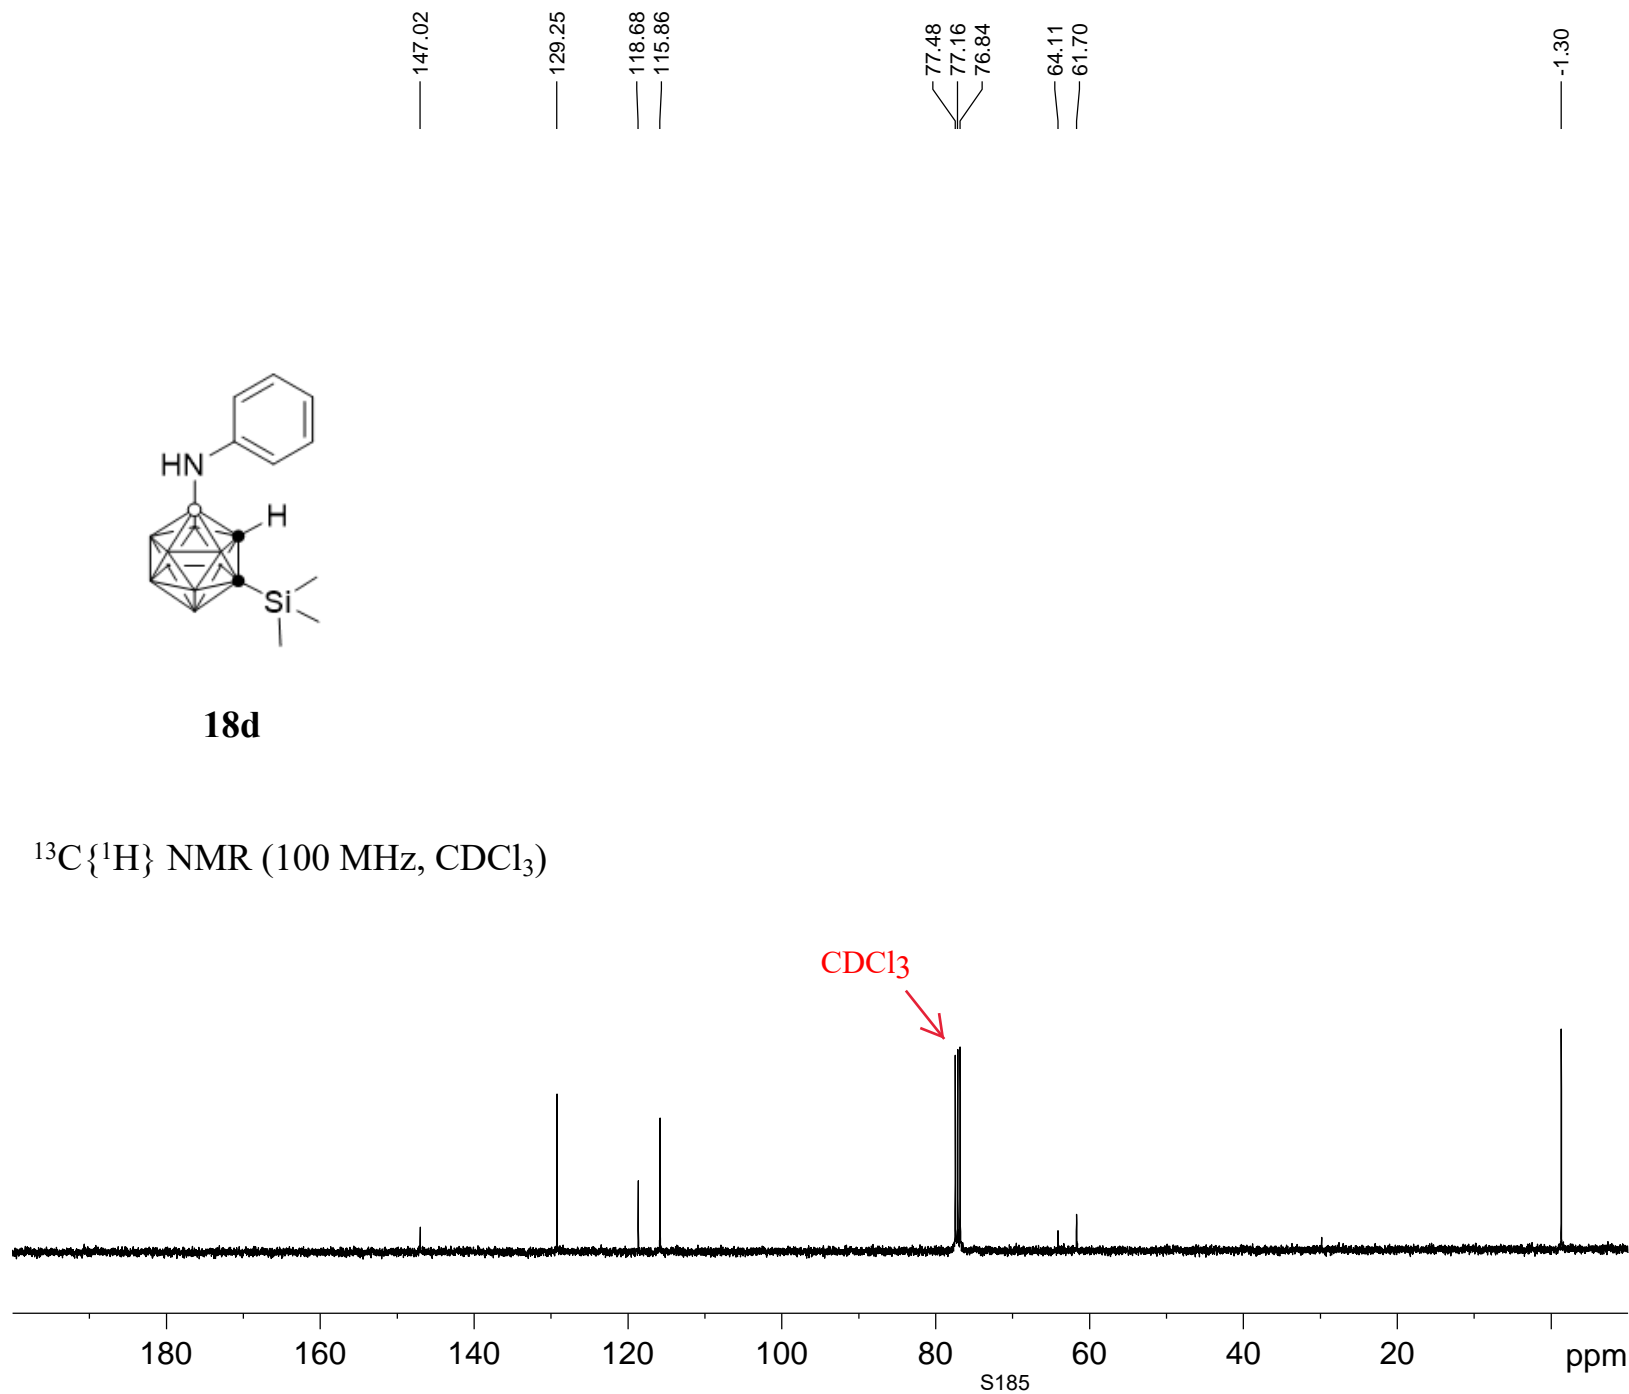

1hr-C-0531-p1-TMSpl

Current Data Parameters  
 NAME 1hr-C-0531-p1-TMSphnh-CDCl3  
 EXPNO 1  
 PROCNO 1

F2 - Acquisition Parameters  
 Date\_ 20161107  
 Time\_ 21.06 h  
 INSTRUM spect  
 PROBHD Z108618\_0257 ( )  
 PULPROG zgpg30  
 TD 65536  
 SOLVENT CDCl3  
 NS 100  
 DS 4  
 SWH 29761.904 Hz  
 FIDRES 0.454131 Hz  
 AQ 1.1010048 sec  
 RG 203  
 DW 16.800 usec  
 DE 6.50 usec  
 TE 296.3 K  
 D1 2.00000000 sec  
 D11 0.03000000 sec  
 TD0 1  
 SFO1 100.6479773 MHz  
 NUC1 13C  
 P1 9.50 usec  
 PLW1 55.34000015 W  
 SFO2 400.2316009 MHz  
 NUC2 1H  
 CPDPRG[2] waltz16  
 PCPD2 90.00 usec  
 PLW2 13.56000042 W  
 PLW12 0.27428001 W  
 PLW13 0.13796000 W

F2 - Processing parameters  
 SI 32768  
 SF 100.6379032 MHz  
 WDW EM  
 SSB 0  
 LB 1.00 Hz  
 GB 0  
 PC 1.40

1hr-B-0531-p1-TMSphnh-CDCl3

Current Data Parameters  
NAME 1hr-B-0531-p1-TMSphnh-CDCl3  
EXPNO 1  
PROCNO 1

F2 - Acquisition Parameters  
Date\_ 20161107  
Time 21.18 h  
INSTRUM spect  
PROBHD z108618\_0257 ( )  
PULPROG zgdc  
TD 65536  
SOLVENT CDCl3  
NS 21  
DS 4  
SWH 24038.461 Hz  
FIDRES 0.366798 Hz  
AQ 1.3631488 sec  
RG 203  
DW 20.800 usec  
DE 6.50 usec  
TE 296.6 K  
D1 2.00000000 sec  
D11 0.03000000 sec  
TD0 1  
SFO1 128.4096890 MHz  
NUC1 11B  
P1 7.50 usec  
PLW1 55.09999847 W  
SFO2 400.2316009 MHz  
NUC2 1H  
CPDPRG[2] waltz16  
PCPD2 90.00 usec  
PLW2 13.56000042 W  
PLW12 0.27428001 W

F2 - Processing parameters  
SI 32768  
SF 128.4097615 MHz  
WDW EM  
SSB 0  
LB 1.00 Hz  
GB 0  
PC 1.40

— -0.53  
— -2.67  
— -9.15  
— -10.17  
— -13.02  
— -14.07  
— -15.10  
— -15.54  
— -18.44

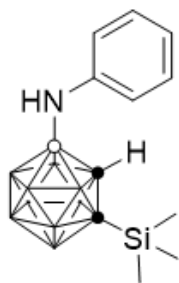

18d

$^{11}\text{B}\{^1\text{H}\}$  NMR (128 MHz,  $\text{CDCl}_3$ )

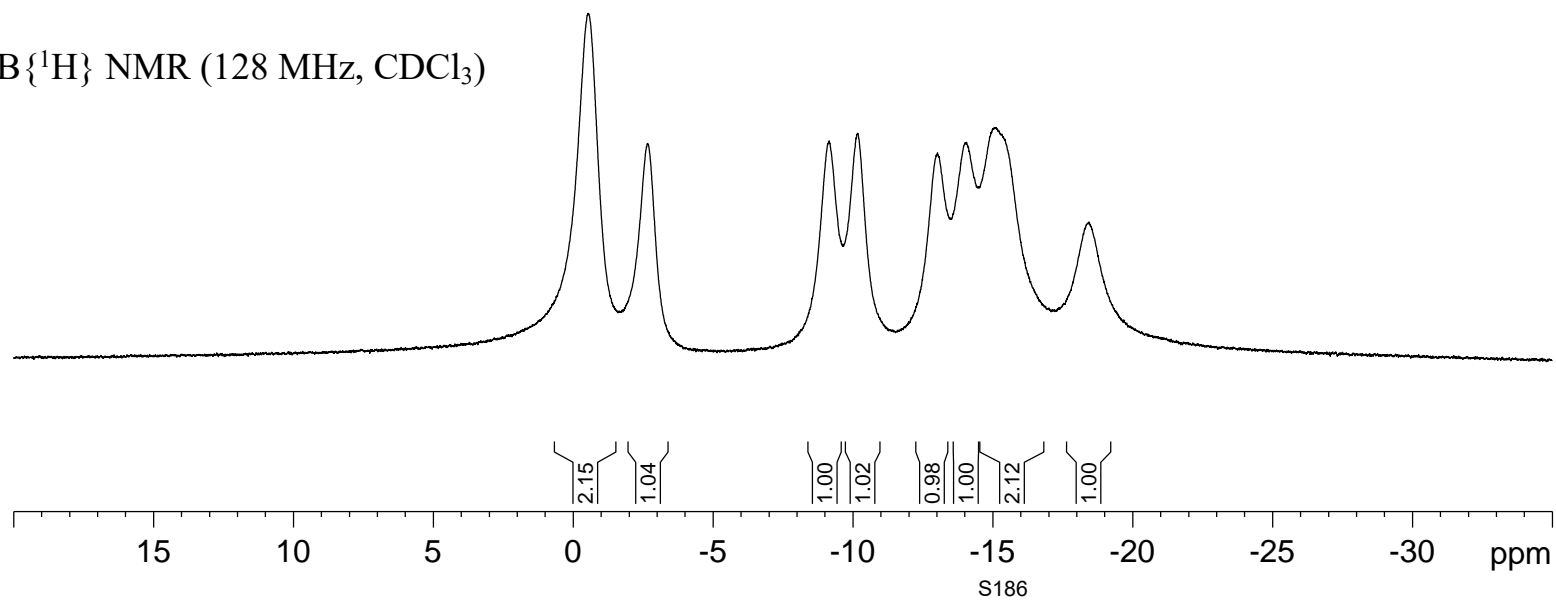

1hr-B-0531-p1-TMSphnh-CDC13(C)

Current Data Parameters  
NAME 1hr-B-0531-p1-TMSphnh-CDC13(C)  
EXPNO 1  
PROCNO 1

F2 - Acquisition Parameters  
Date\_ 20161107  
Time 21.16 h  
INSTRUM spect  
PROBHD Z108618\_0257 (  
PULPROG zg  
TD 65536  
SOLVENT CDC13  
NS 16  
DS 2  
SWH 24038.461 Hz  
FIDRES 0.366798 Hz  
AQ 1.3631488 sec  
RG 203  
DW 20.800 usec  
DE 6.50 usec  
TE 296.1 K  
D1 2.0000000 sec  
TD0 1  
SFO1 128.4096890 MHz  
NUC1 11B  
P1 7.50 usec  
PLW1 55.09999847 W

F2 - Processing parameters  
SI 32768  
SF 128.4097504 MHz  
WDW EM  
SSB 0  
LB 1.00 Hz  
GB 0  
PC 1.40

— -0.29  
— -1.13  
— -2.01  
— -3.21  
  
— -8.47  
— -9.57  
— -10.68  
— -12.35  
— -13.51  
— -14.53  
— -15.56  
  
— -17.70  
— -18.96

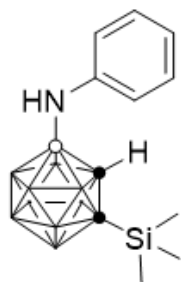

18d

$^{11}\text{B}$  NMR (128 MHz,  $\text{CDCl}_3$ )

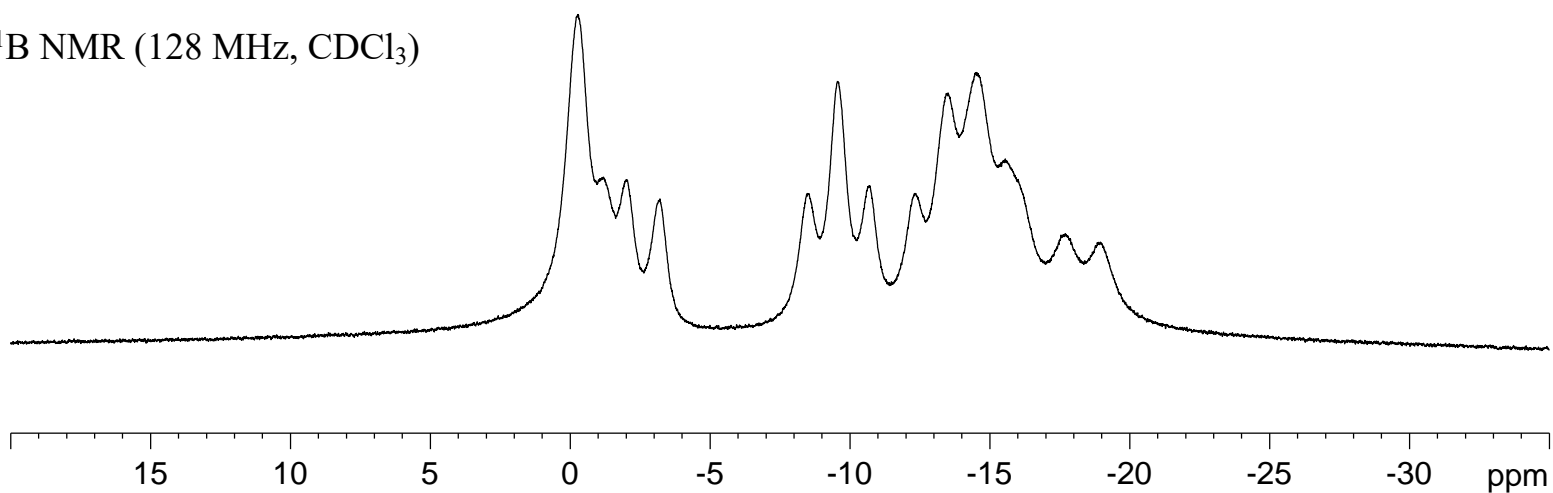

# Thermo QEFMS Analysis Report

## Analysis Info

|               |                                        |                |          |
|---------------|----------------------------------------|----------------|----------|
| Sample Name : | Lhr-531-P1                             | Reference No.: | Qzwx063  |
| Instrument :  | Q Exactive Focus Orbitrap              |                |          |
| Source :      | HESI II                                | Polarity :     | Positive |
| Comment :     | ESI pos, 3.5kV, by LC, with sheath gas |                |          |

## Accurate Mass Measurement

|                                        |                                                     |
|----------------------------------------|-----------------------------------------------------|
| Molecular formula :                    | C <sub>11</sub> H <sub>25</sub> B <sub>10</sub> NSi |
| Experimental Mass [M+H] <sup>+</sup> : | 308.28292                                           |
| Theoretical Mass [M+H] <sup>+</sup> :  | 308.28334                                           |
| Error (ppm) :                          | 1.3                                                 |

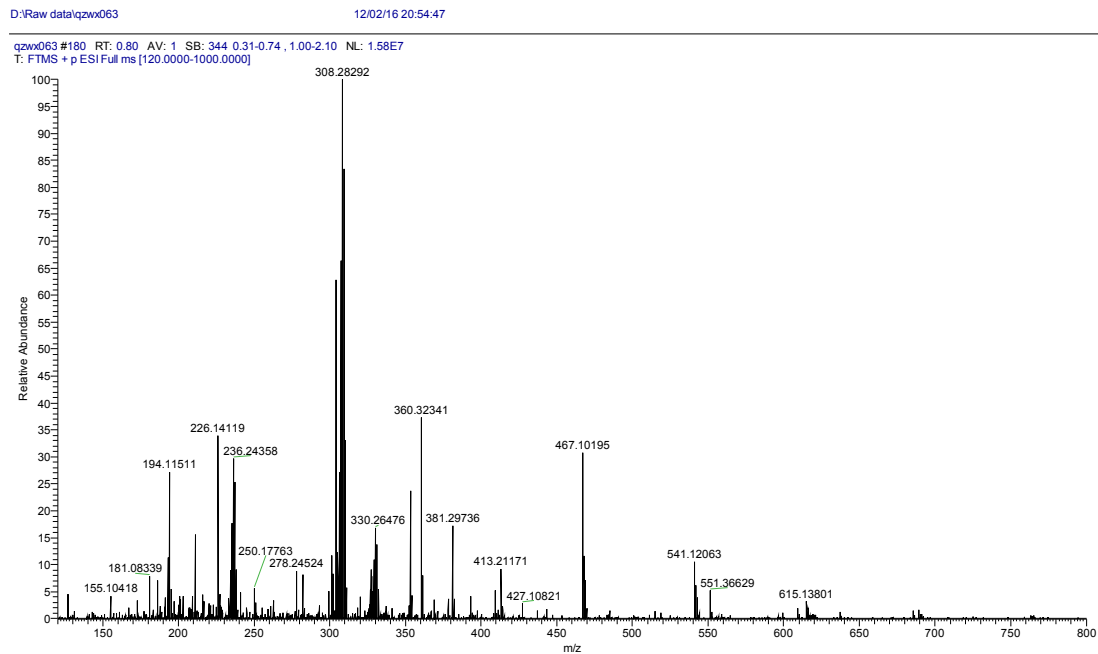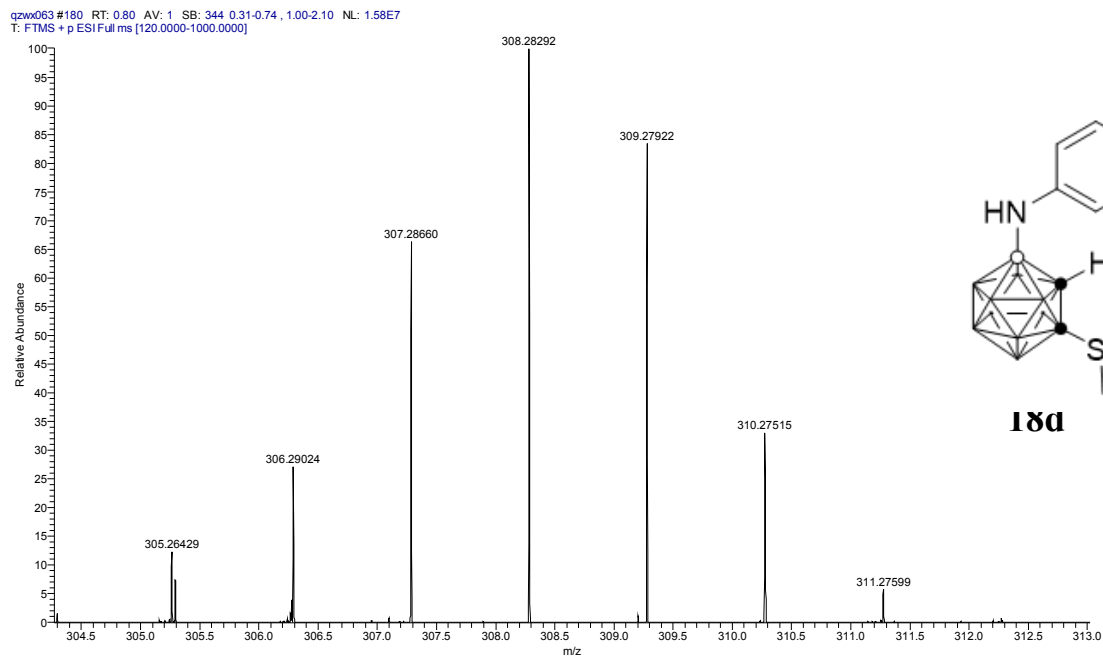



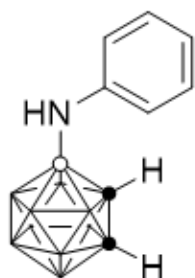

**19d**

<sup>1</sup>H NMR (400 MHz, CDCl<sub>3</sub>)

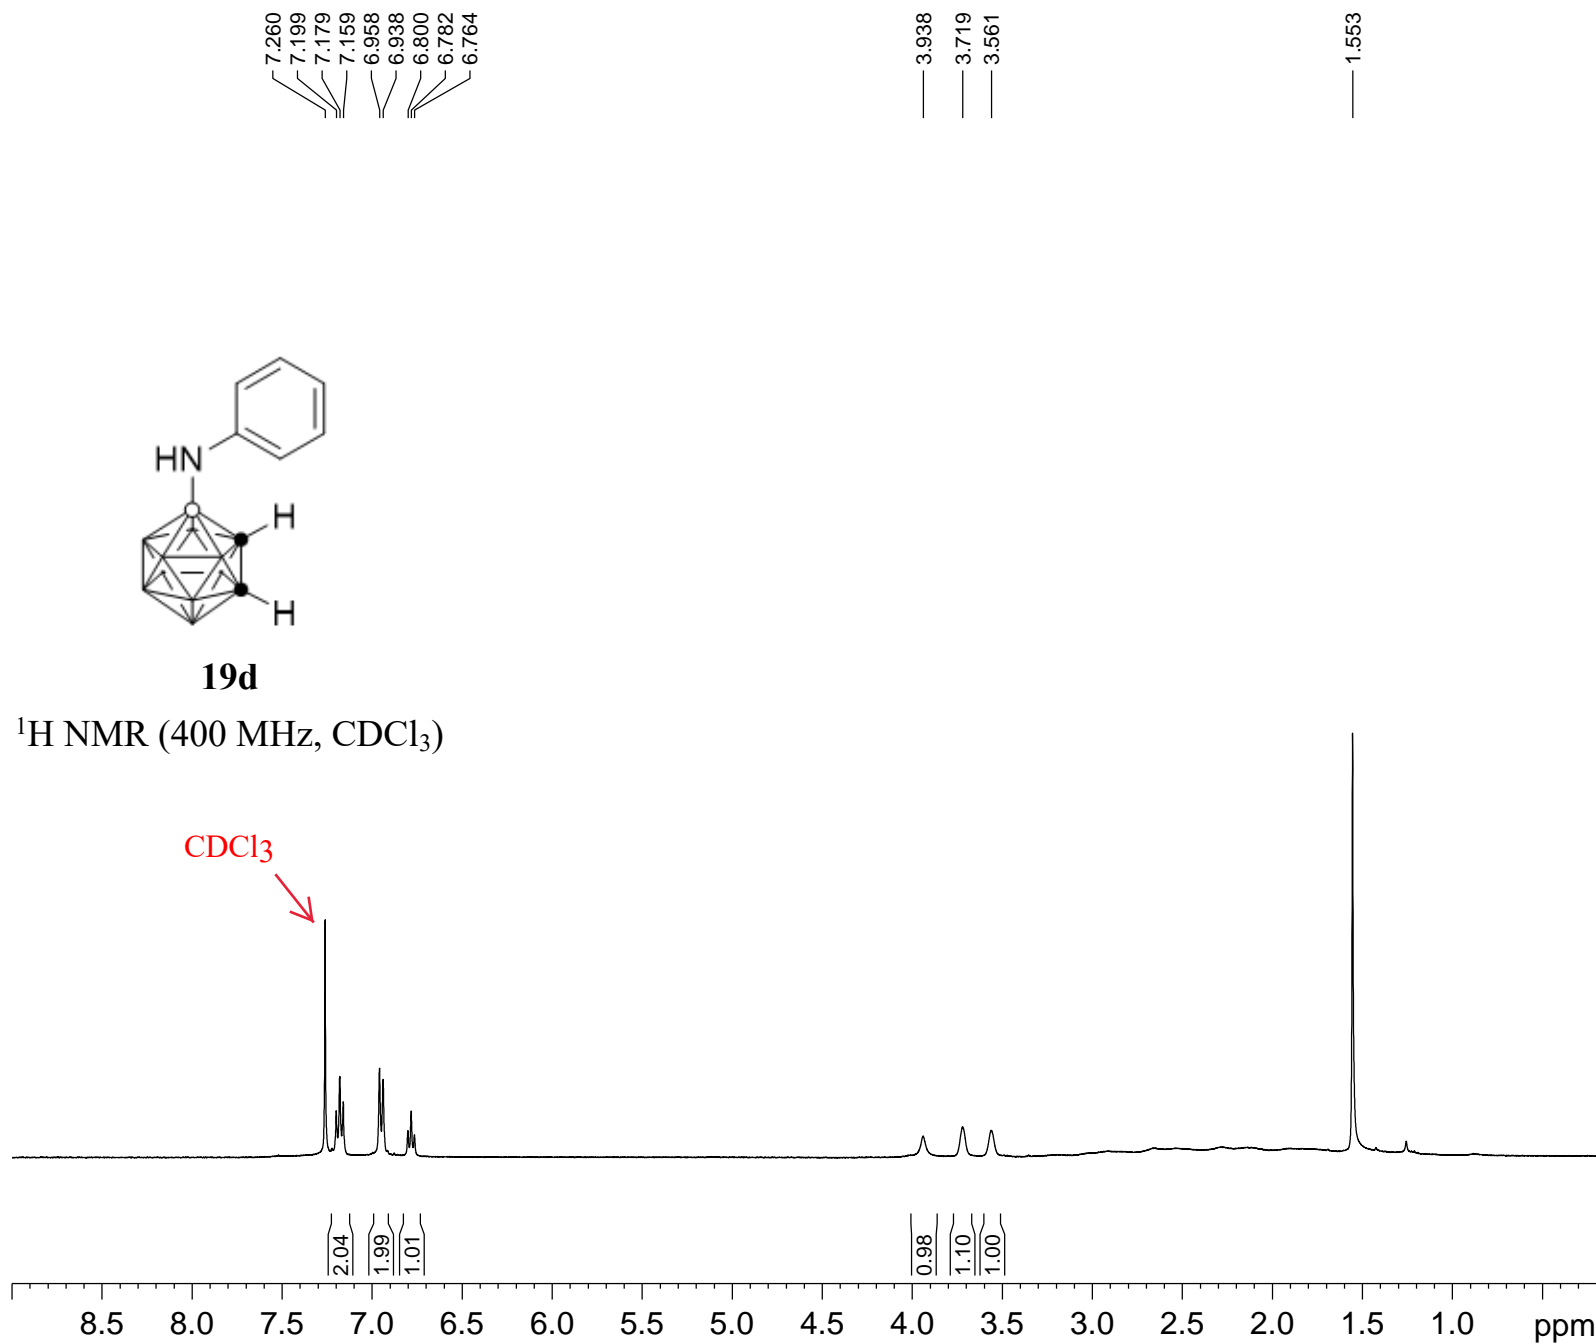

lhr-H-0531-p2-Hphnh

Current Data Parameters  
 NAME lhr-H-0531-p2-Hphnh-CD  
 EXPNO 2  
 PROCNO 1

F2 - Acquisition Parameters  
 Date\_ 20161110  
 Time 10.12 h  
 INSTRUM spect  
 PROBHD Z108618\_0257 (  
 PULPROG zg30  
 TD 65536  
 SOLVENT CDCl3  
 NS 16  
 DS 2  
 SWH 8012.820 Hz  
 FIDRES 0.122266 Hz  
 AQ 4.0894465 sec  
 RG 228  
 DW 62.400 usec  
 DE 6.50 usec  
 TE 297.4 K  
 D1 1.00000000 sec  
 TD0 1  
 SFO1 400.2324714 MHz  
 NUC1 1H  
 P1 12.80 usec  
 PLW1 13.56000042 W

F2 - Processing parameters  
 SI 65536  
 SF 400.2300105 MHz  
 WDW EM  
 SSB 0  
 LB 0.30 Hz  
 GB 0  
 PC 1.00

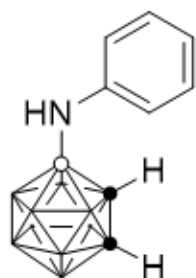

19d

 $^{13}\text{C}\{^1\text{H}\}$  NMR (100 MHz,  $\text{CDCl}_3$ )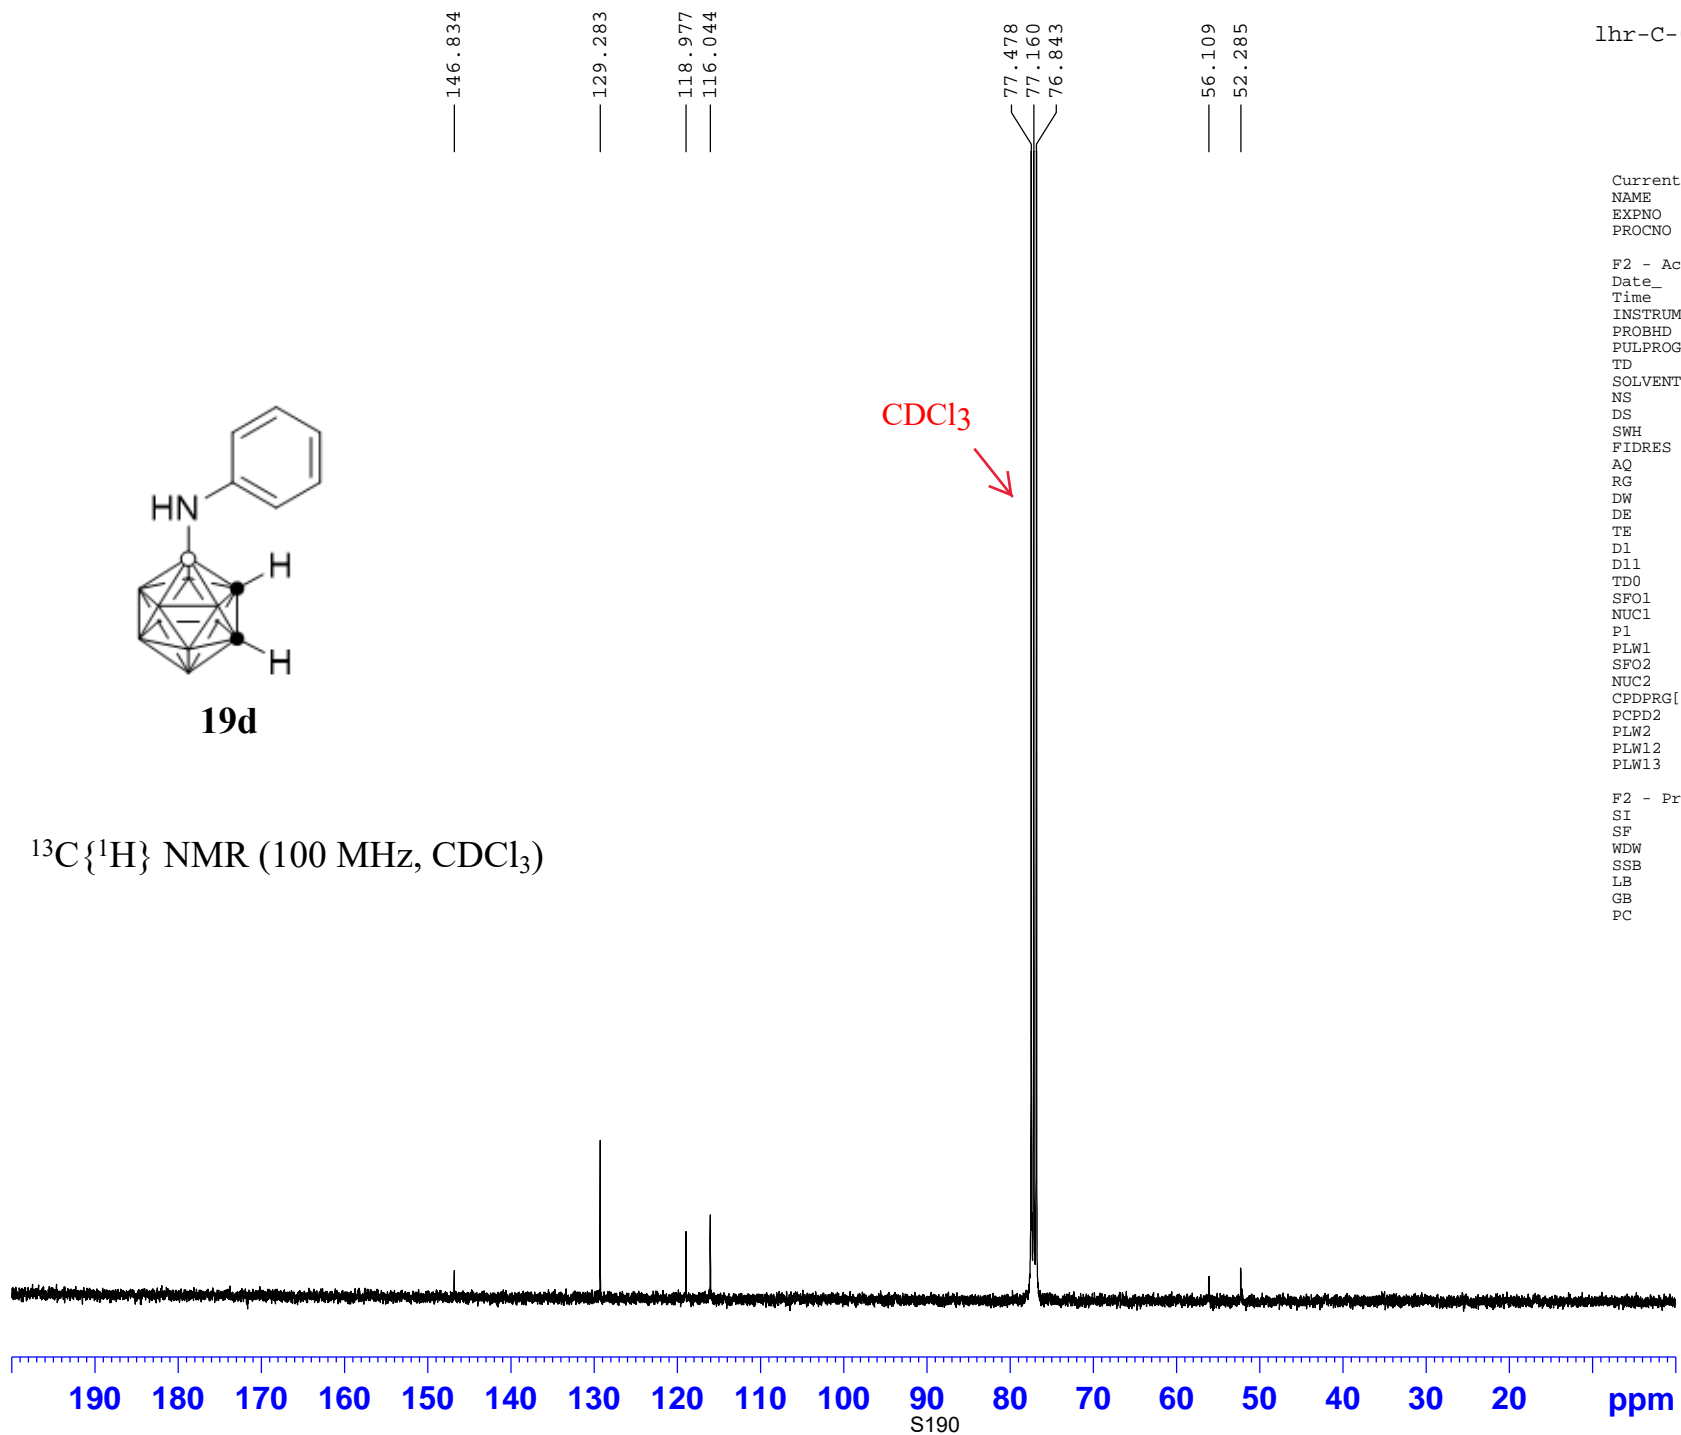

Current Data Parameters  
NAME lhr-C-0531-p2-CDC13-re  
EXPNO 1  
PROCNO 1

F2 - Acquisition Parameters  
Date\_ 20161110  
Time 17.09 h  
INSTRUM spect  
PROBHD Z824601\_0021 (  
PULPROG zgpg30  
TD 65536  
SOLVENT CDCl3  
NS 2947  
DS 4  
SWH 24038.461 Hz  
FIDRES 0.366798 Hz  
AQ 1.3631488 sec  
RG 203  
DW 20.800 usec  
DE 6.50 usec  
TE 295.3 K  
D1 2.0000000 sec  
D11 0.0300000 sec  
TD0 1  
SF01 100.6228298 MHz  
NUC1 13C  
P1 9.50 usec  
PLW1 41.2500000 W  
SFO2 400.1316005 MHz  
NUC2 1H  
CPDPRG[2] waltz16  
PCPD2 90.00 usec  
PLW2 8.31000042 W  
PLW12 0.23083000 W  
PLW13 0.11611000 W

F2 - Processing parameters  
SI 32768  
SF 100.6127548 MHz  
WDW EM  
SSB 0  
LB 1.00 Hz  
GB 0  
PC 1.40

1hr-B-0531-p2-Hphnh-CDC13

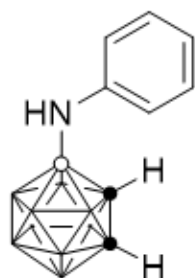

19d

Chemical shift values (ppm):  
-1.31  
-2.64  
-3.27  
-10.75  
-12.30  
-14.19  
-16.25  
-20.96

Current Data Parameters  
NAME 1hr-B-0531-p2-Hphnh-CDC13  
EXPNO 1  
PROCNO 1

F2 - Acquisition Parameters

Date\_ 20161108  
Time 10.33 h  
INSTRUM spect  
PROBHD Z108618\_0257 (  
PULPROG zgdc  
TD 65536  
SOLVENT CDC13  
NS 20  
DS 4  
SWH 24038.461 Hz  
FIDRES 0.366798 Hz  
AQ 1.3631488 sec  
RG 456  
DW 20.800 usec  
DE 6.50 usec  
TE 295.6 K  
D1 2.00000000 sec  
D11 0.03000000 sec  
TD0 1  
SFO1 128.4096890 MHz  
NUC1 11B  
P1 7.50 usec  
PLW1 55.09999847 W  
SFO2 400.2316009 MHz  
NUC2 1H  
CPDPRG[2] waltz16  
PCPD2 90.00 usec  
PLW2 13.56000042 W  
PLW12 0.27428001 W

F2 - Processing parameters  
SI 32768  
SF 128.4097615 MHz  
WDW EM  
SSB 0  
LB 1.00 Hz  
GB 0  
PC 1.40

$^{11}\text{B}\{^1\text{H}\}$  NMR (128 MHz,  $\text{CDCl}_3$ )

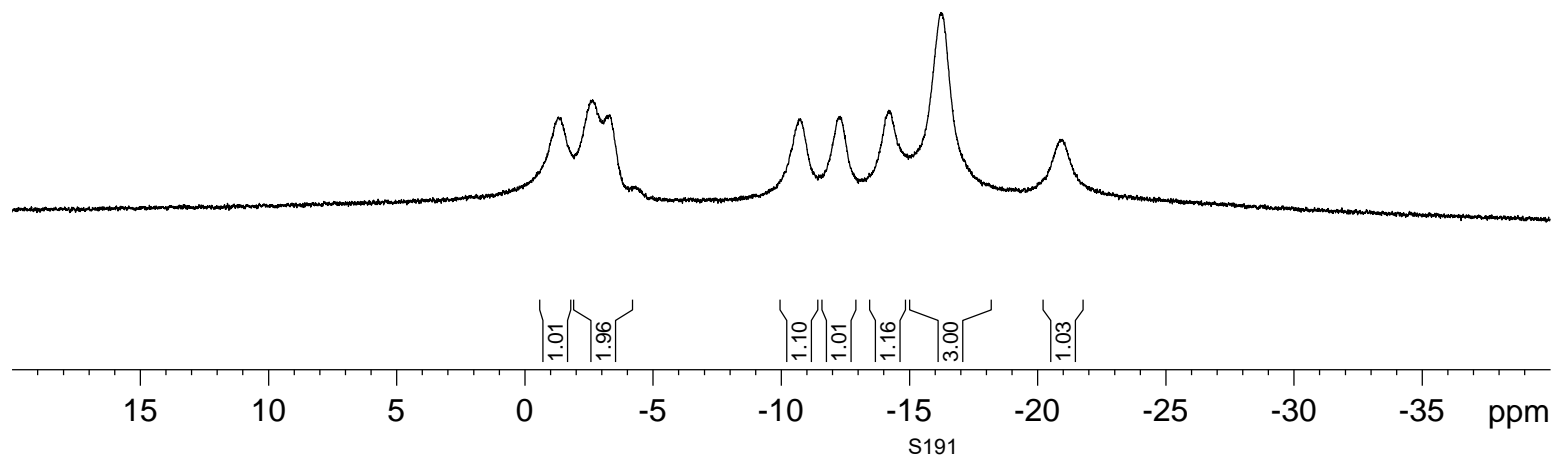

1hr-B-0531-p2-Hphnh-CDCl3

1.29  
1.82  
2.71  
-10.01  
-11.31  
-12.77  
-13.46  
-14.75  
-15.44  
-16.82  
-20.14  
-21.48

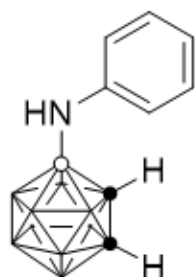

19d

Current Data Parameters  
NAME 1hr-B-0531-p2-Hphnh-CDCl3(C)  
EXPNO 1  
PROCNO 1

F2 - Acquisition Parameters  
Date\_ 20161108  
Time 10.36 h  
INSTRUM spect  
PROBHD Z108618\_0257 (  
PULPROG zg  
TD 65536  
SOLVENT CDCl3  
NS 28  
DS 2  
SWH 24038.461 Hz  
FIDRES 0.366798 Hz  
AQ 1.3631488 sec  
RG 456  
DW 20.800 usec  
DE 6.50 usec  
TE 295.4 K  
D1 2.00000000 sec  
TD0 1  
SF01 128.4096890 MHz  
NUC1 11B  
P1 7.50 usec  
PLW1 55.09999847 W

F2 - Processing parameters  
SI 32768  
SF 128.4097504 MHz  
WDW EM  
SSB 0  
LB 1.00 Hz  
GB 0  
PC 1.40

$^{11}\text{B}$  NMR (128 MHz,  $\text{CDCl}_3$ )

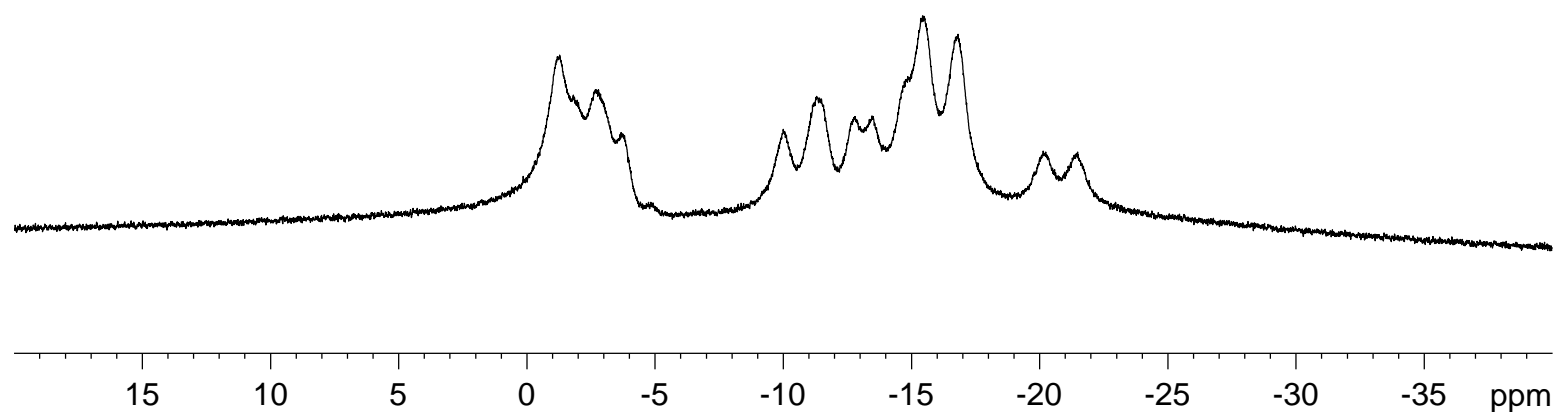

# Thermo QEFMS Analysis Report

## Analysis Info

|               |                                        |                |          |
|---------------|----------------------------------------|----------------|----------|
| Sample Name : | Lhr-531-P2                             | Reference No.: | Qzwx064  |
| Instrument :  | Q Exactive Focus Orbitrap              |                |          |
| Source :      | HESI II                                | Polarity :     | Positive |
| Comment :     | ESI pos, 3.5kV, by LC, with sheath gas |                |          |

## Accurate Mass Measurement

|                                        |                                                  |
|----------------------------------------|--------------------------------------------------|
| Molecular formula :                    | C <sub>8</sub> H <sub>17</sub> B <sub>10</sub> N |
| Experimental Mass [M+H] <sup>+</sup> : | 236.24360                                        |
| Theoretical Mass [M+H] <sup>+</sup> :  | 236.24370                                        |
| Error (ppm) :                          | 0.4                                              |

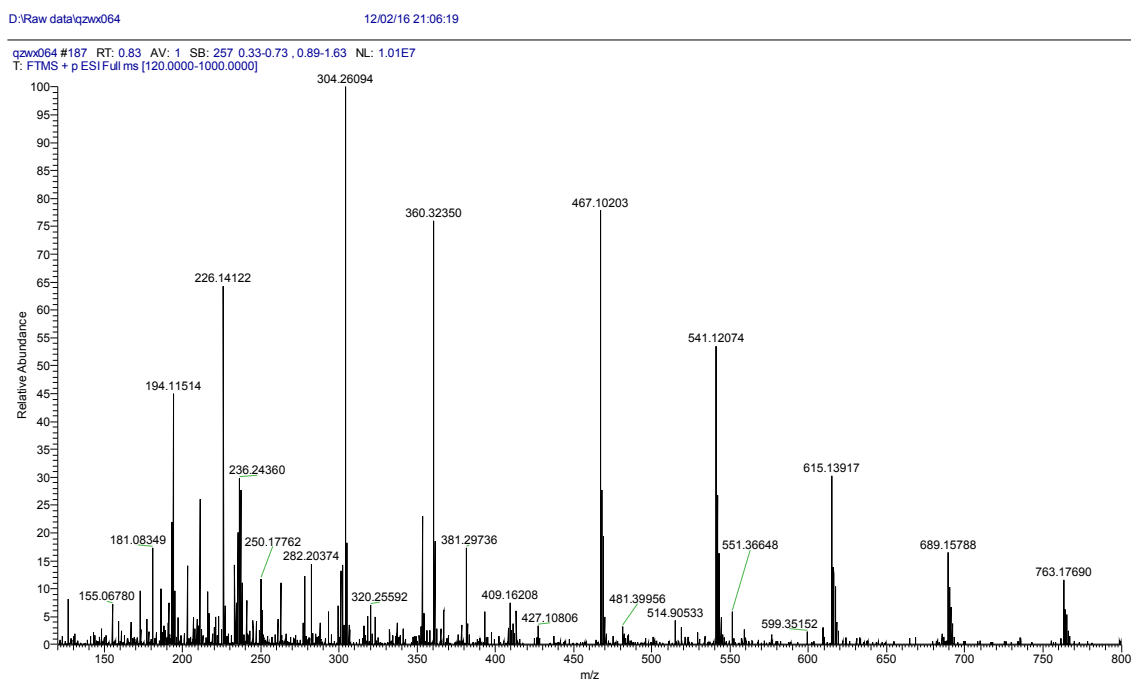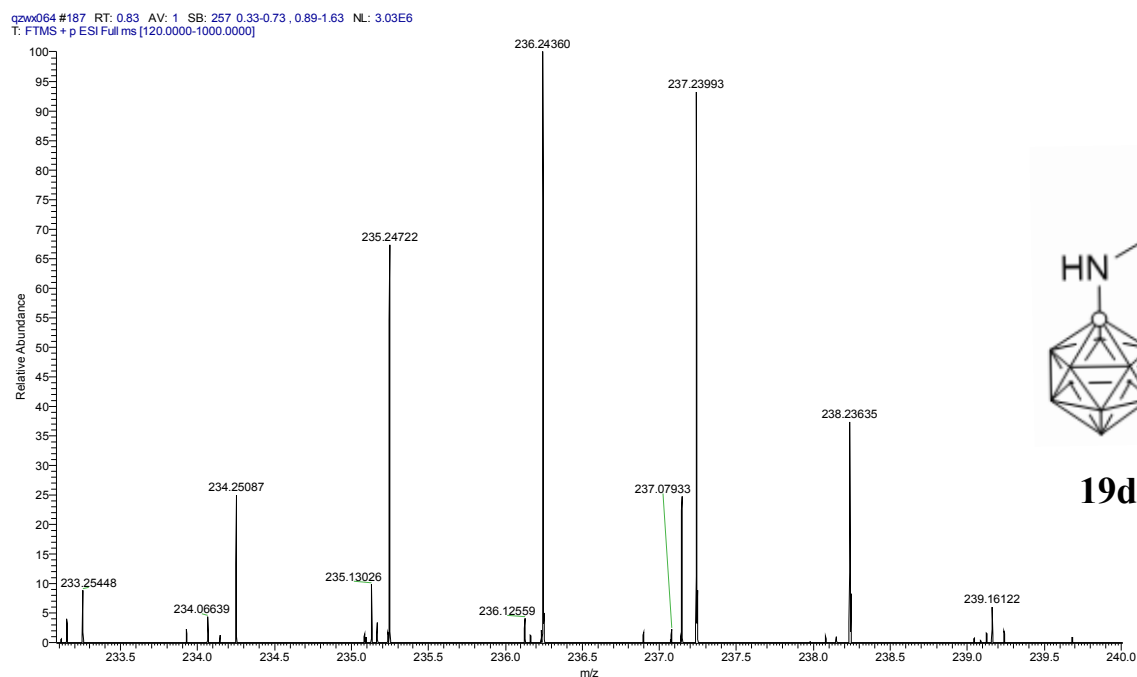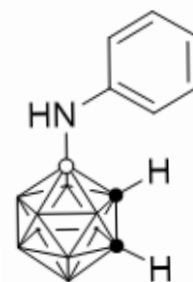

19d

7.260

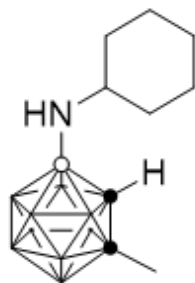

20d

<sup>3</sup>J "POT"\*622"OJ | .EF E<sub>15</sub>+

3.529

2.705  
2.680  
2.655  
2.014  
1.902  
1.875  
1.686  
1.656  
1.564  
1.543  
1.299  
1.252  
1.239  
1.207  
1.139  
1.109  
1.078  
0.991  
0.964

lhr-H-0556-12-cc-CDC13

Bruker Advance III 400

Current Data Parameters  
 NAME lhr-H-0556-12-cc-CDC13  
 EXPNO 1  
 PROCNO 1

F2 - Acquisition Parameters

Date\_ 20161216  
 Time 9.35 h  
 INSTRUM spect  
 PROBHD Z824601\_0021 (  
 PULPROG zg30  
 TD 65536  
 SOLVENT CDC13  
 NS 12  
 DS 2  
 SWH 8012.820 Hz  
 FIDRES 0.122266 Hz  
 AQ 4.0894465 sec  
 RG 203  
 DW 62.400 usec  
 DE 6.50 usec  
 TE 296.8 K  
 D1 1.00000000 sec  
 TD0 1  
 SFO1 400.1324708 MHz  
 NUC1 1H  
 P1 15.00 usec  
 PLW1 8.31000042 W

F2 - Processing parameters

SI 65536  
 SF 400.1300104 MHz  
 WDW EM  
 SSB 0  
 LB 0.30 Hz  
 GB 0  
 PC 1.00

EF E<sub>15</sub>

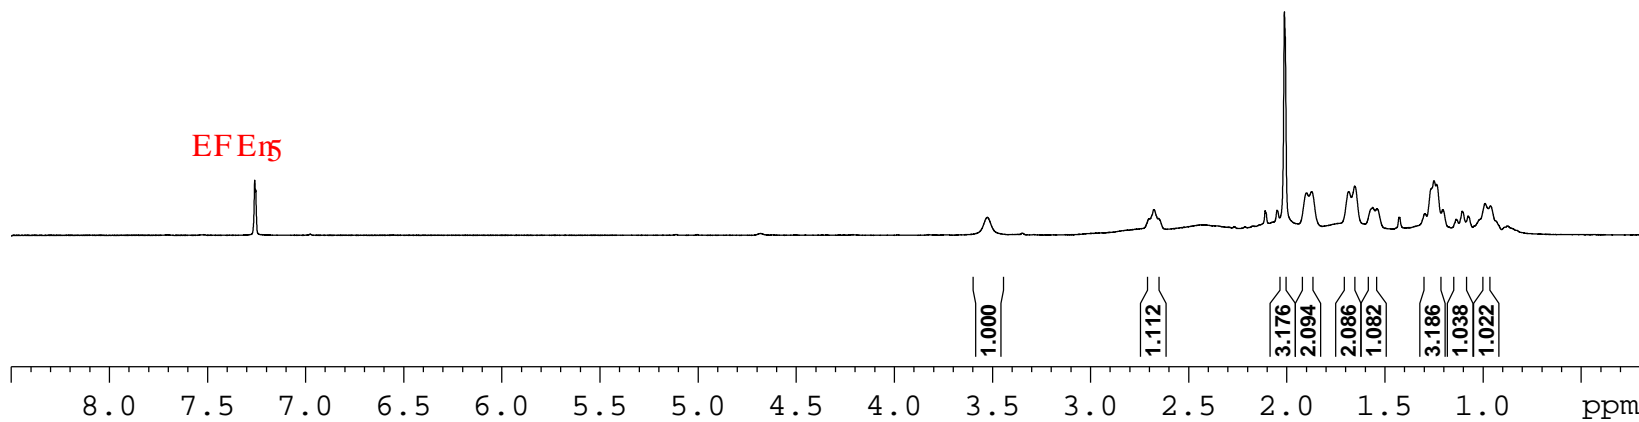

lhr-C-0556-12-cc-CDCl3

Bruker Advance III 400

Current Data Parameters  
NAME lhr-C-0556-12-cc-CDCl3  
EXPNO 1  
PROCNO 1

F2 - Acquisition Parameters  
Date\_ 20161216  
Time 14.12 h  
INSTRUM spect  
PROBHD Z824601\_0021 (  
PULPROG zgpg30  
TD 65536  
SOLVENT CDCl3  
NS 1351  
DS 4  
SWH 24038.461 Hz  
FIDRES 0.366798 Hz  
AQ 1.3631488 sec  
RG 203  
DW 20.800 usec  
DE 6.50 usec  
TE 295.3 K  
D1 2.0000000 sec  
D11 0.0300000 sec  
TD0 1  
SFO1 100.6228298 MHz  
NUC1 13C  
P1 9.50 usec  
PLW1 41.2500000 W  
SFO2 400.1316005 MHz  
NUC2 1H  
CPDPRG2 waltz16  
PCPD2 90.00 usec  
PLW2 8.31000042 W  
PLW12 0.23083000 W  
PLW13 0.11611000 W

F2 - Processing parameters  
SI 32768  
SF 100.6127549 MHz  
WDW EM  
SSB 0  
LB 1.00 Hz  
GB 0  
PC 1.40

77.478  
77.160  
76.843  
68.119  
63.117  
55.990  
37.040  
36.993  
26.007  
25.890  
25.590

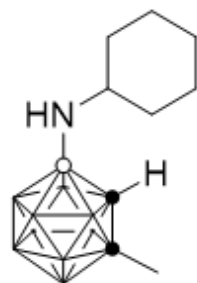

20d

$^{35}\text{E}\}^3\text{J}$  ; "POT"\*322'OJ | .'EFE $\text{E}_3$ +

EFE $\text{E}_3$

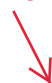

180 160 140 120 100 80 60 40 20 ppm

S195

lhr-B-0556-12-cc-CDCl3

Current Data Parameters  
NAME lhr-B-0556-12-cc-CDCl3  
EXPNO 1  
PROCNO 1

F2 - Acquisition Parameters  
Date\_ 20161216  
Time 10.37 h  
INSTRUM spect  
PROBHD Z108618\_0257 (  
PULPROG zgdc  
TD 65536  
SOLVENT C6D6  
NS 22  
DS 4  
SWH 24038.461 Hz  
FIDRES 0.366798 Hz  
AQ 1.3631488 sec  
RG 287  
DW 20.800 usec  
DE 6.50 usec  
TE 296.6 K  
D1 2.0000000 sec  
D11 0.03000000 sec  
TD0 1  
SFO1 128.4096890 MHz  
NUC1 11B  
P1 7.50 usec  
PLW1 55.09999847 W  
SFO2 400.2316009 MHz  
NUC2 1H  
CPDPRG[2] waltz16  
PCPD2 90.00 usec  
PLW2 13.56000042 W  
PLW12 0.27428001 W

F2 - Processing parameters  
SI 32768  
SF 128.4097615 MHz  
WDW EM  
SSB 0  
LB 1.00 Hz  
GB 0  
PC 1.40

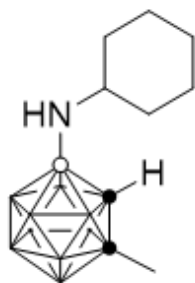

20d

$^{33}\text{D}\}^3\text{J}; \text{'POT'}^{\text{34}}: \text{'OJ} | \text{'EFE}^{\text{13}}+$

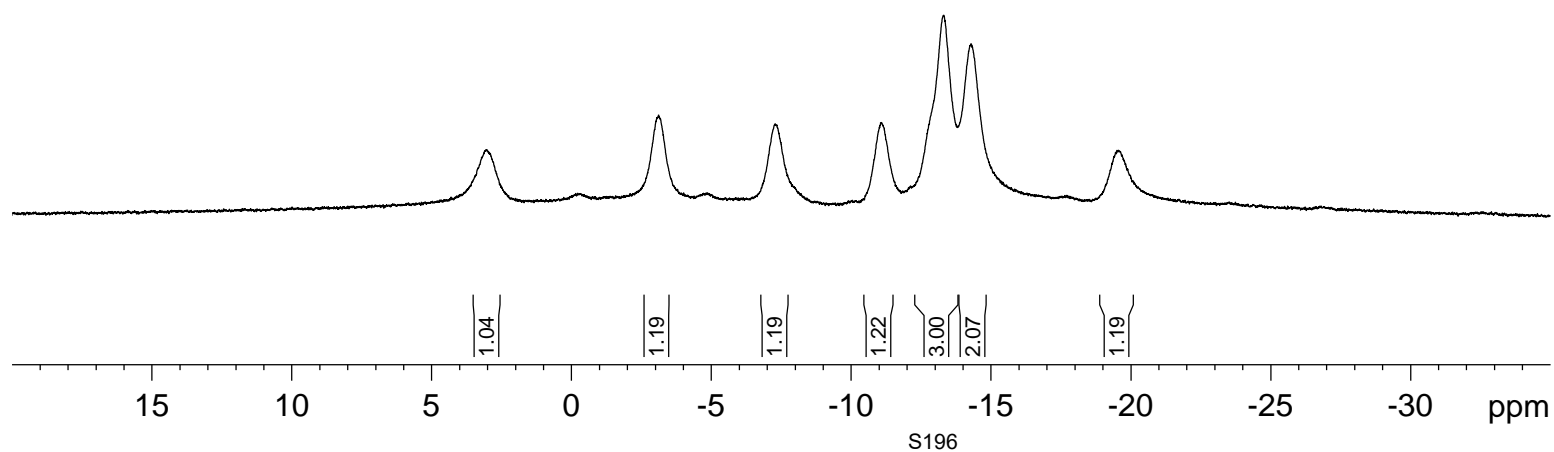



1hr-B-0556-12-cc-CDCl3(C

Current Data Parameters  
NAME 1hr-B-0556-12-cc-CDCl3(C  
EXPNO 1  
PROCNO 1

F2 - Acquisition Parameters  
Date\_ 20161216  
Time 10.39 h  
INSTRUM spect  
PROBHD Z108618\_0257 (  
PULPROG zg  
TD 65536  
SOLVENT C6D6  
NS 31  
DS 2  
SWH 24038.461 Hz  
FIDRES 0.366798 Hz  
AQ 1.3631488 sec  
RG 362  
DW 20.800 usec  
DE 6.50 usec  
TE 296.1 K  
D1 2.00000000 sec  
TD0 1  
SF01 128.4096890 MHz  
NUC1 11B  
P1 7.50 usec  
PLW1 55.09999847 W

F2 - Processing parameters  
SI 32768  
SF 128.4097430 MHz  
WDW EM  
SSB 0  
LB 1.00 Hz  
GB 0  
PC 1.40

3.21  
-2.35  
-3.50  
-6.55  
-7.65  
-10.33  
-11.50  
-12.51  
-13.58  
-14.72  
-18.70  
-19.99

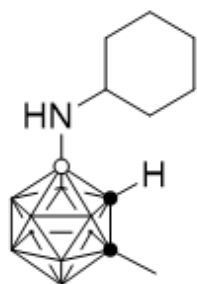

20d

$^{33}\text{D}'\text{POT}^*34: \text{'OJ} | \text{'EFE}_n^+$

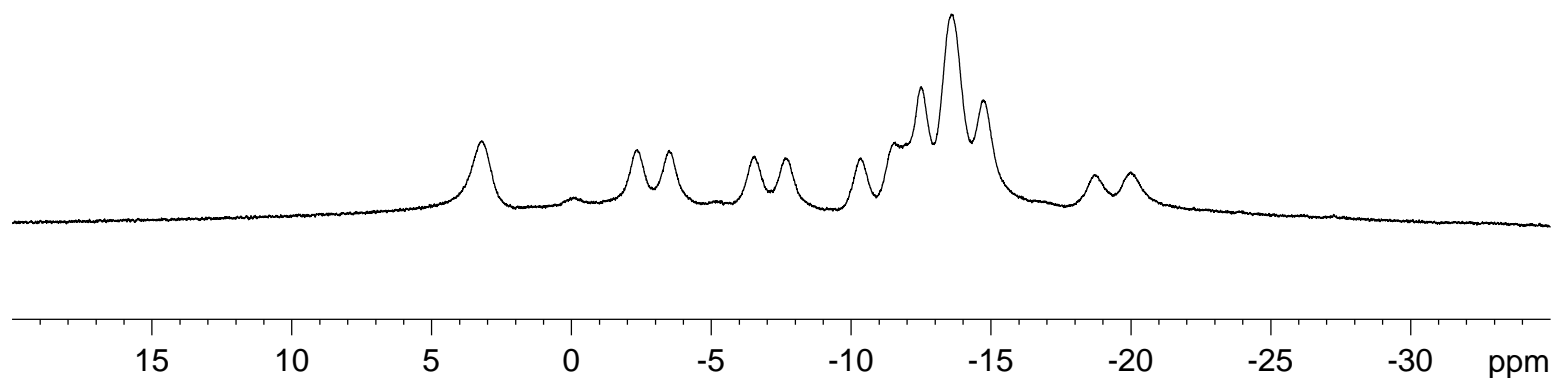

zwx2649 #2 RT: 0.18 AV: 1 NL: 5.17E6  
T: + c EI Full ms [ 79.50-400.50]

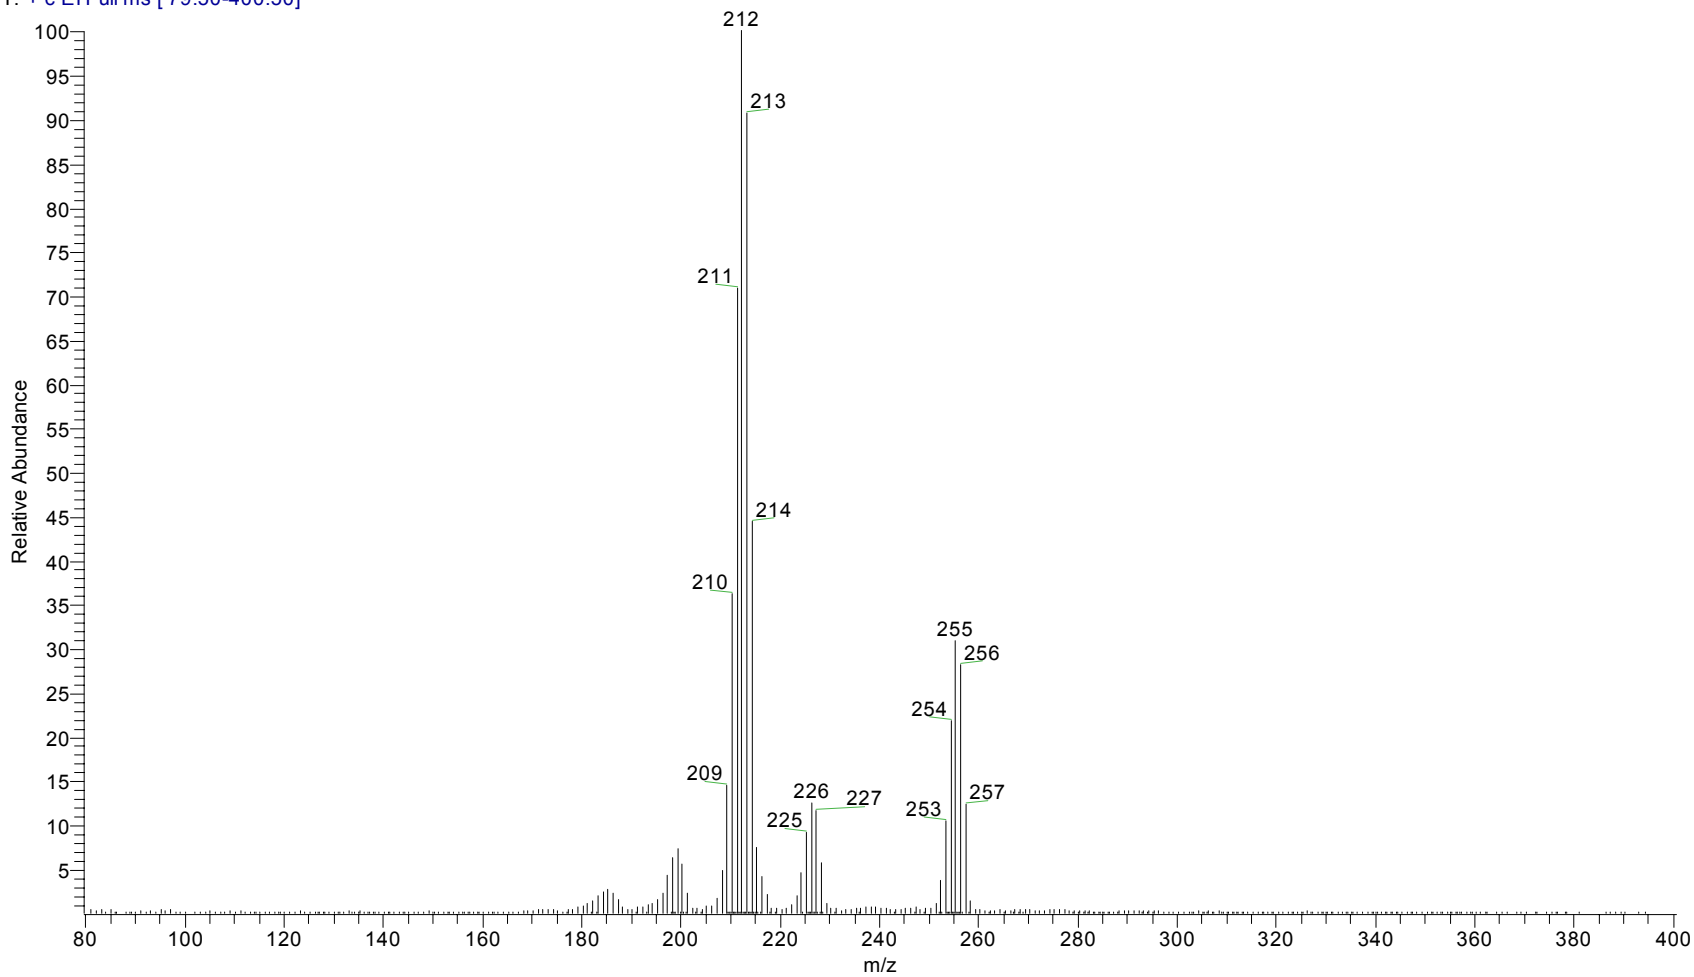

zwx2649 #2 RT: 0.18 AV: 1 NL: 1.60E6  
T: + c EI Full ms [ 79.50-400.50]

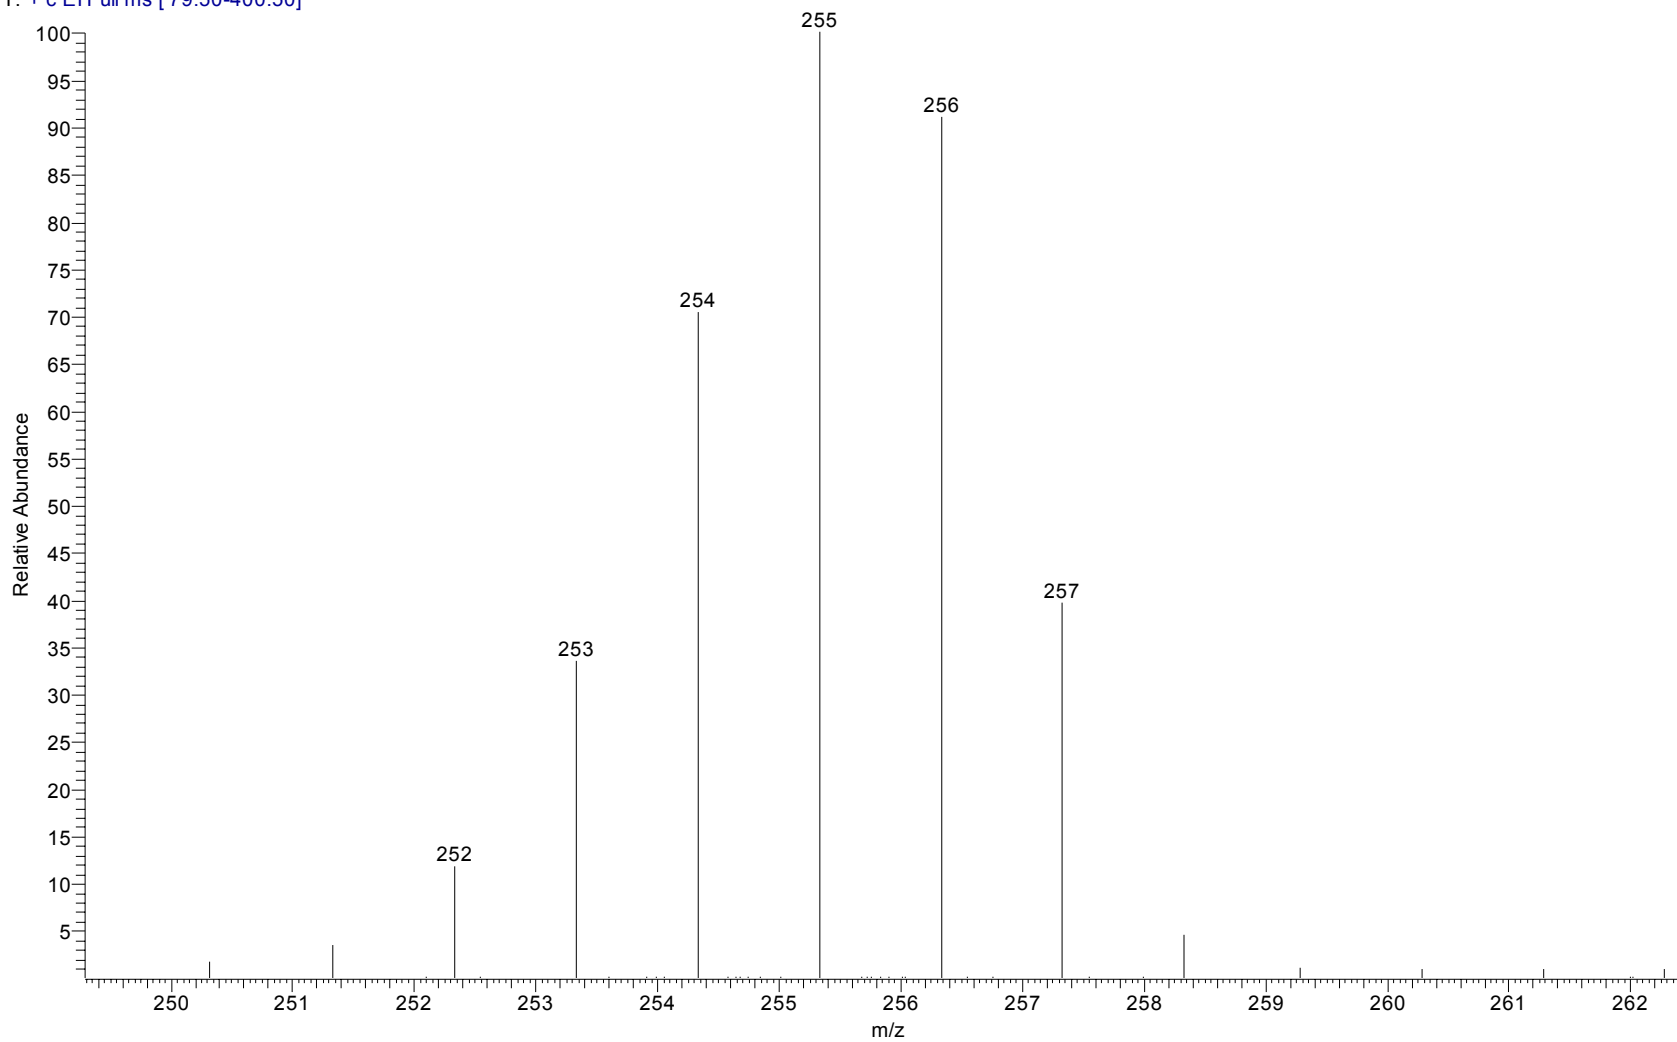

## Accurate Mass Measurement

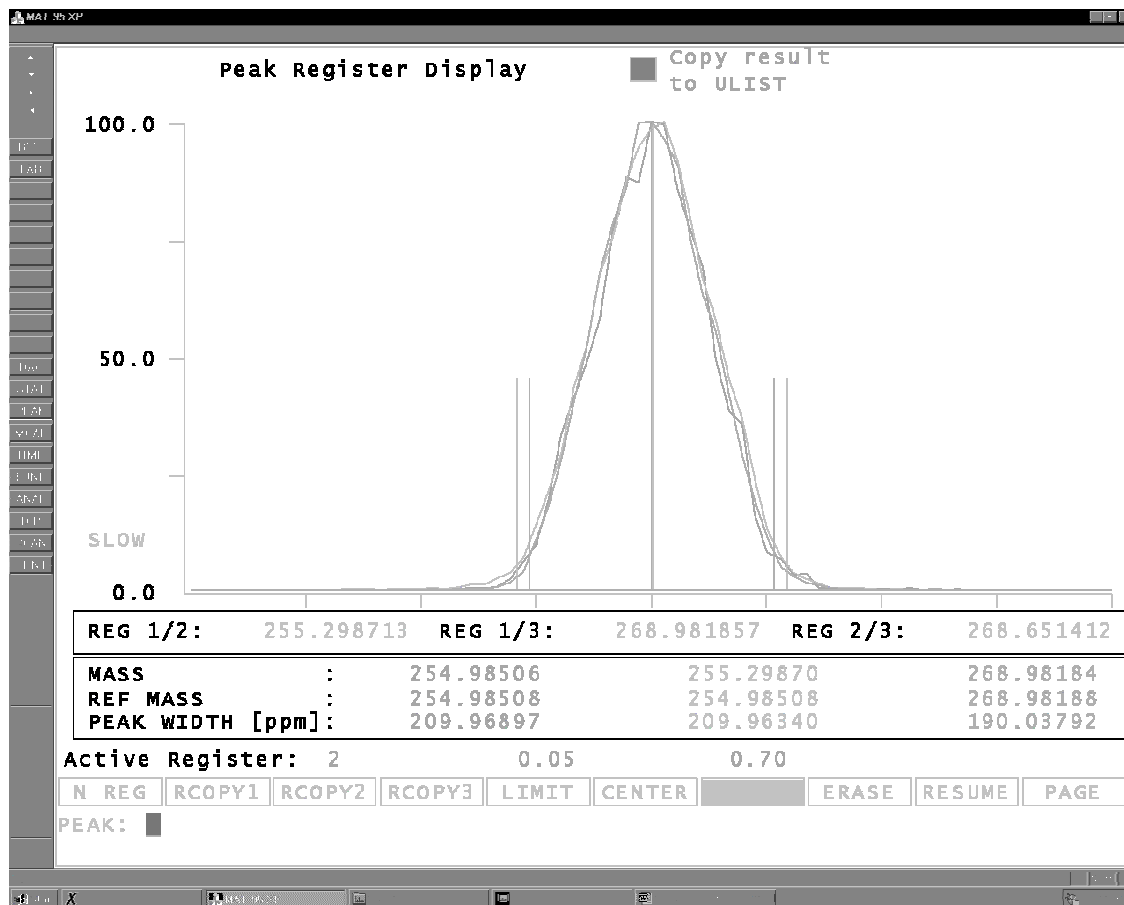

Molecular formula  
 $C_9H_{25}B_{10}N$   
 $[M]^+$  (theoretical)  
= 255.2985

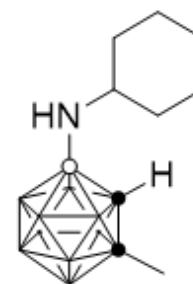

20d

7.160

3.361  
3.344  
3.326  
3.309  
3.292  
2.542  
1.867  
1.852  
1.837  
1.823  
1.810  
1.569  
1.547  
1.536  
1.530  
1.425  
1.414  
1.408  
1.396  
1.361  
1.211  
1.153  
1.135  
1.117  
1.103  
1.085  
1.063

lhr-H-0578-ce-CDC13

Bruker Advance III 400

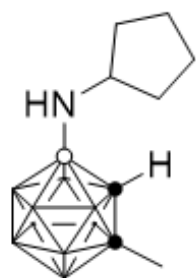

21d

$^3\text{J } ^1\text{POT}^{\text{H}}\text{C}^{\text{H}}\text{OJ} | \cdot \text{E8F8}^+$

Current Data Parameters  
NAME lhr-H-0578-ce-CDC13  
EXPNO 1  
PROCNO 1

F2 - Acquisition Parameters  
Date\_ 20161229  
Time 17.25 h  
INSTRUM spect  
PROBHD Z824601\_0021 (  
PULPROG zg30  
TD 65536  
SOLVENT CDC13  
NS 15  
DS 2  
SWH 8012.820 Hz  
FIDRES 0.122266 Hz  
AQ 4.089465 sec  
RG 203  
DW 62.400 usec  
DE 6.50 usec  
TE 295.1 K  
D1 1.00000000 sec  
TD0 1  
SF01 400.1324708 MHz  
NUC1 1H  
P1 15.00 usec  
PLW1 8.31000042 W

F2 - Processing parameters  
SI 65536  
SF 400.1300286 MHz  
WDW EM  
SSB 0  
LB 0.30 Hz  
GB 0  
PC 1.00

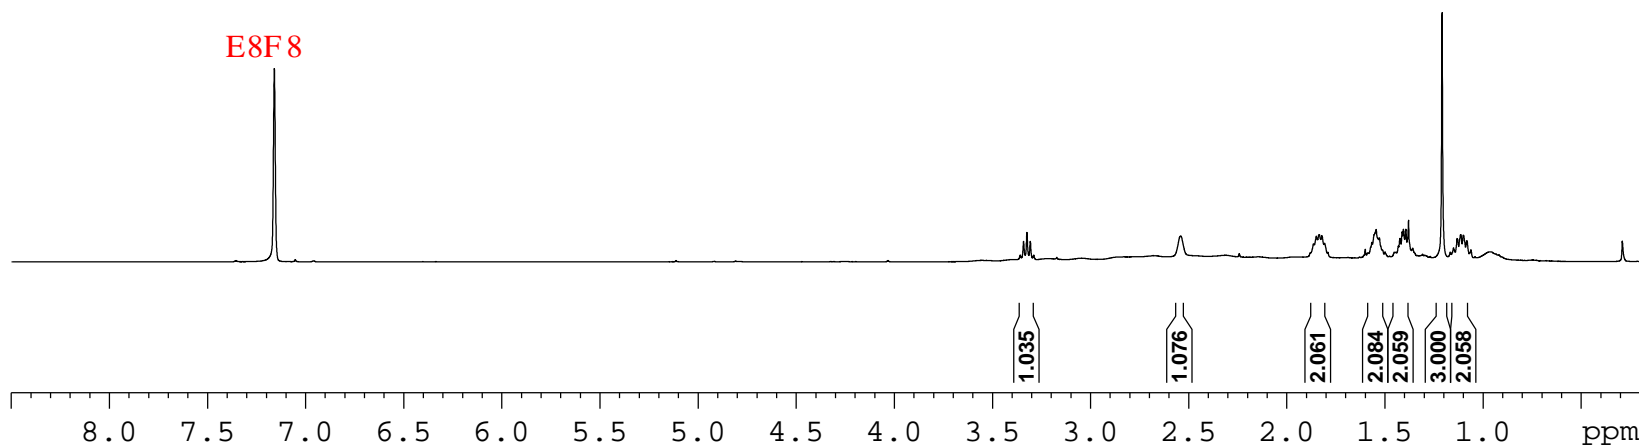

lhr-C-0578-ce-C6D6

Bruker Advance III 400

Current Data Parameters  
NAME lhr-C-0578-ce-C6D6  
EXPNO 1  
PROCNO 1

F2 - Acquisition Parameters  
Date\_ 20161229  
Time 17.32 h  
INSTRUM spect  
PROBHD Z824601\_0021 (  
PULPROG zgpg30  
TD 65536  
SOLVENT CDC13  
NS 1173  
DS 4  
SWH 24038.461 Hz  
FIDRES 0.366798 Hz  
AQ 1.3631488 sec  
RG 203  
DW 20.800 usec  
DE 6.50 usec  
TE 295.7 K  
D1 2.00000000 sec  
D11 0.03000000 sec  
TD0 1  
SFO1 100.6228298 MHz  
NUC1 13C  
P1 9.50 usec  
PLW1 41.25000000 W  
SFO2 400.1316005 MHz  
NUC2 1H  
CPDPRG[2] waltz16  
PCPD2 90.00 usec  
PLW2 8.31000042 W  
PLW12 0.23083000 W  
PLW13 0.11611000 W

F2 - Processing parameters  
SI 32768  
SF 100.6127391 MHz  
WDW EM  
SSB 0  
LB 1.00 Hz  
GB 0  
PC 1.40

128.301  
128.060  
127.819

67.853  
62.963  
59.326

36.387  
36.325

25.210  
23.818  
23.796

E8F8

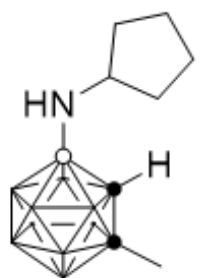

21d

$^{35}\text{E}\}^3\text{J}; \text{'POT}'^{\%322}\text{'OJ} | \text{'E6D6}+$

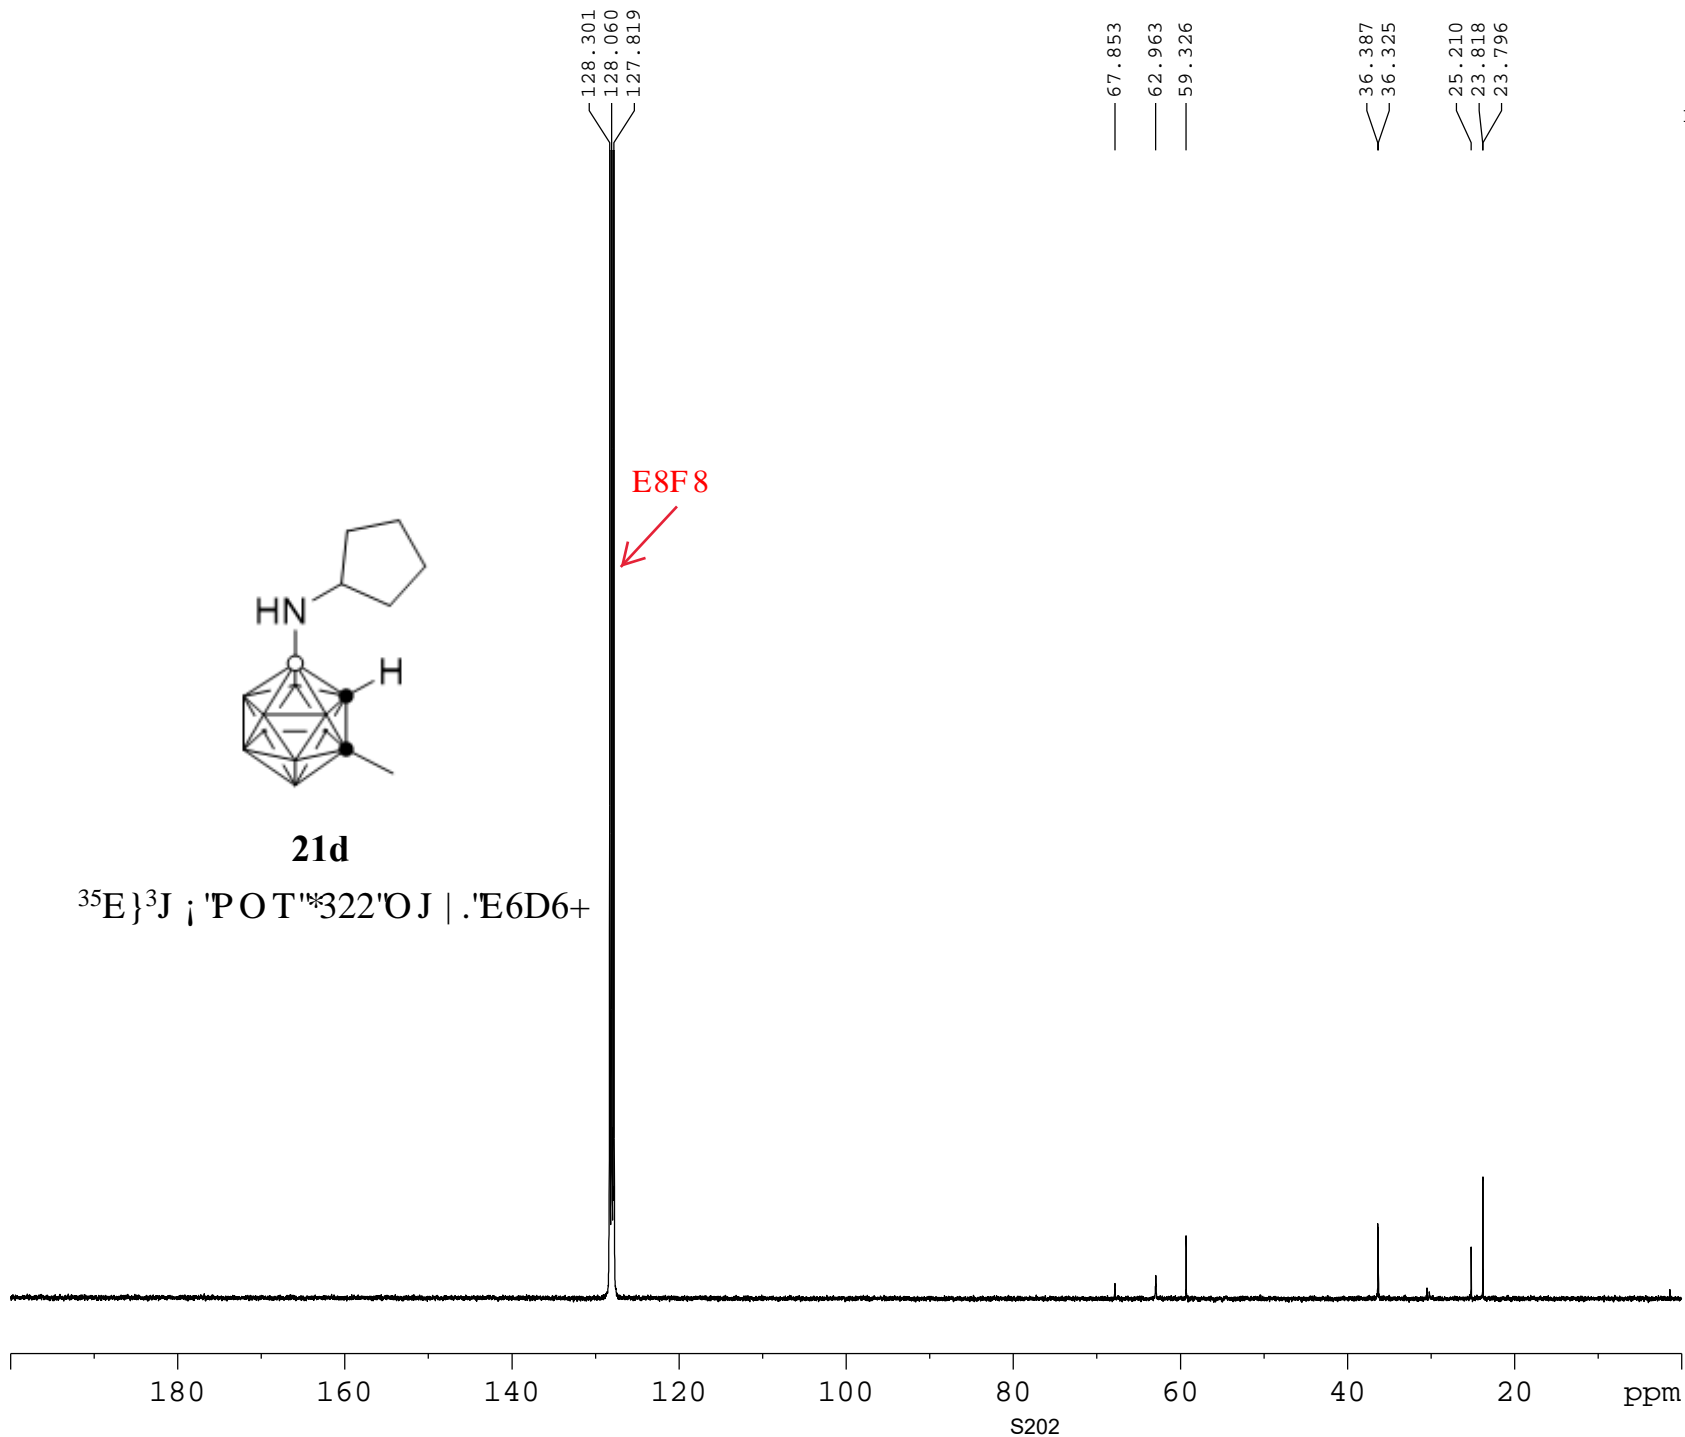

180

160

140

120

100

80

60

40

20

ppm

S202

lhr-B-0578-ce-C6D6

Current Data Parameters  
NAME lhr-B-0578-ce-C6D6  
EXPNO 1  
PROCNO 1

F2 - Acquisition Parameters  
Date\_ 20161229  
Time 18.41 h  
INSTRUM spect  
PROBHD Z108618\_0257 (  
PULPROG zgdc  
TD 65536  
SOLVENT CDCl3  
NS 21  
DS 4  
SWH 24038.461 Hz  
FIDRES 0.366798 Hz  
AQ 1.3631488 sec  
RG 287  
DW 20.800 usec  
DE 6.50 usec  
TE 294.6 K  
D1 2.00000000 sec  
D11 0.03000000 sec  
TD0 1  
SFO1 128.4096890 MHz  
NUC1 11B  
P1 7.50 usec  
PLW1 55.0999847 W  
SFO2 400.2316009 MHz  
NUC2 1H  
CPDPRG[2] waltz16  
PCPD2 90.00 usec  
PLW2 13.56000042 W  
PLW12 0.27428001 W

F2 - Processing parameters  
SI 32768  
SF 128.4097615 MHz  
WDW EM  
SSB 0  
LB 1.00 Hz  
GB 0  
PC 1.40

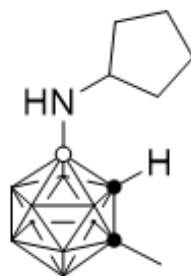

21d

$^{33}\text{D}\}^3\text{J}$  ; "POT"\*34: "OJ | ."E6D6+

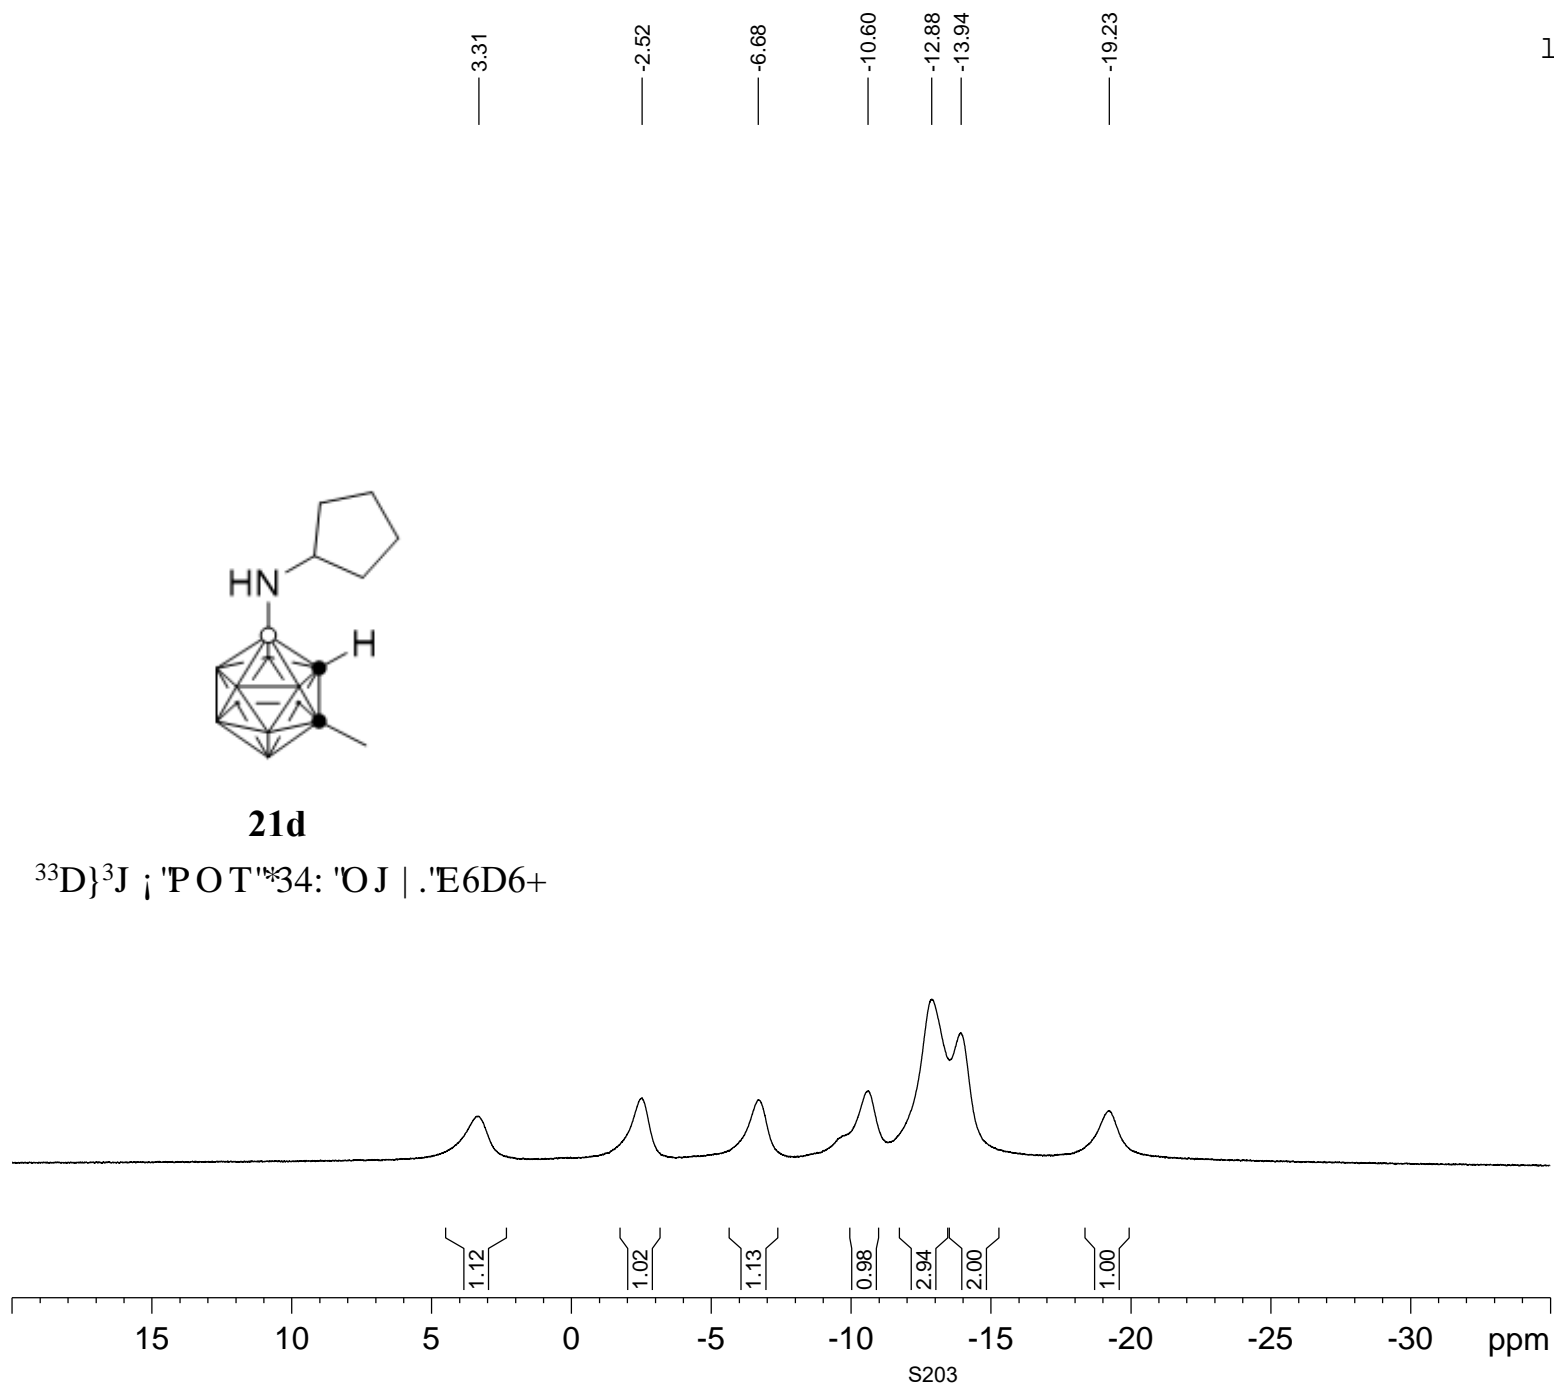

S203

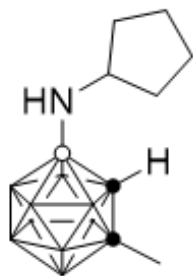

**21d**

$^{33}\text{D}'\text{POT}^*34: \text{'OJ} | \text{'E6D6+}$

3.42  
 -1.86  
 -2.96  
 -6.03  
 -7.18  
 -9.95  
 -11.09  
 -12.22  
 -13.26  
 -14.43  
 -18.49  
 -19.77

lhr-B-0578-ce-C6D6(C)

Current Data Parameters  
 NAME lhr-B-0578-ce-C6D6(C)  
 EXPNO 1  
 PROCNO 1

F2 - Acquisition Parameters  
 Date\_ 20161229  
 Time 18.45 h  
 INSTRUM spect  
 PROBHD z108618\_0257 (  
 PULPROG zg  
 TD 65536  
 SOLVENT CDC13  
 NS 37  
 DS 2  
 SWH 24038.461 Hz  
 FIDRES 0.366798 Hz  
 AQ 1.3631488 sec  
 RG 256  
 DW 20.800 usec  
 DE 6.50 usec  
 TE 294.5 K  
 D1 2.00000000 sec  
 TD0 1  
 SF01 128.4096890 MHz  
 NUC1 11B  
 P1 7.50 usec  
 PLW1 55.09999847 W

F2 - Processing parameters  
 SI 32768  
 SF 128.4097504 MHz  
 WDW EM  
 SSB 0  
 LB 1.00 Hz  
 GB 0  
 PC 1.40

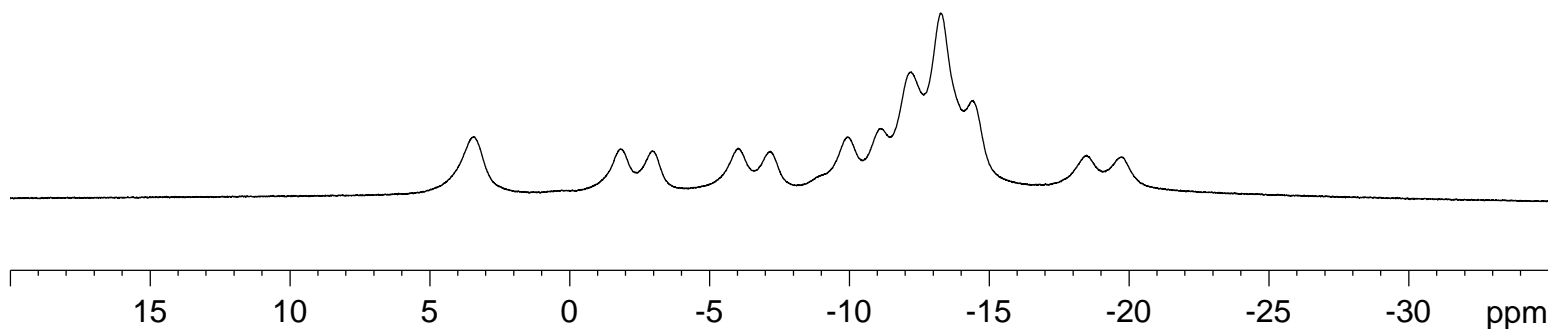



# Thermo QEFMS Analysis Report

## Analysis Info

|               |                                   |                |           |
|---------------|-----------------------------------|----------------|-----------|
| Sample Name : | Uhr-1                             | Reference No.: | aqzwx1547 |
| Instrument :  | Q Exactive Focus Orbitrap         |                |           |
| Source :      | APCI                              | Polarity :     | Positive  |
| Comment :     | APCI, 4uA, by LC, with sheath gas |                |           |

## Accurate Mass Measurement

|                                        |                                                  |
|----------------------------------------|--------------------------------------------------|
| Molecular formula :                    | C <sub>8</sub> H <sub>23</sub> B <sub>10</sub> N |
| Experimental Mass [M+H] <sup>+</sup> : | 242.29082                                        |
| Theoretical Mass [M+H] <sup>+</sup> :  | 242.29105                                        |
| Error (ppm) :                          | -1.0                                             |

D:\Raw data\aqzwx1547

06/17/22 09:31:42

Uhr-1

aqzwx1547 #280-294 RT: 1.25-1.32 AV: 15 SB: 116 0.01-0.52 NL: 3.741  
T: FTMS + p APCI corona Full ms [150.0000-600.0000]

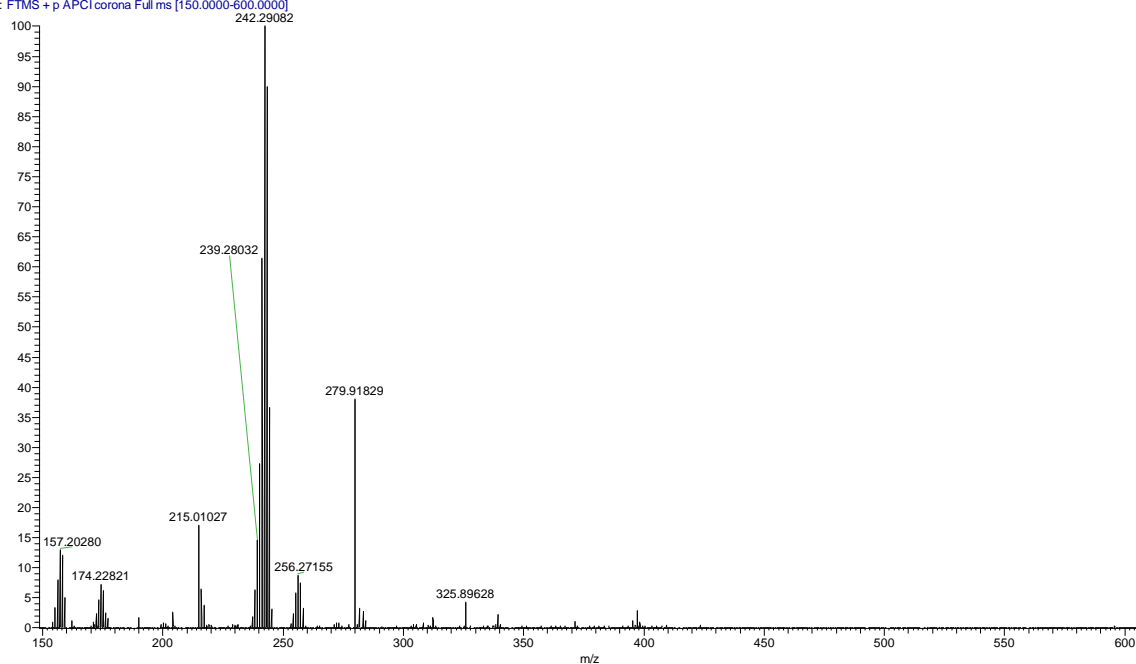

aqzwx1547 #280-294 RT: 1.25-1.32 AV: 15 SB: 116 0.01-0.52 NL: 3.74E7  
T: FTMS + p APCI corona Full ms [150.0000-600.0000]

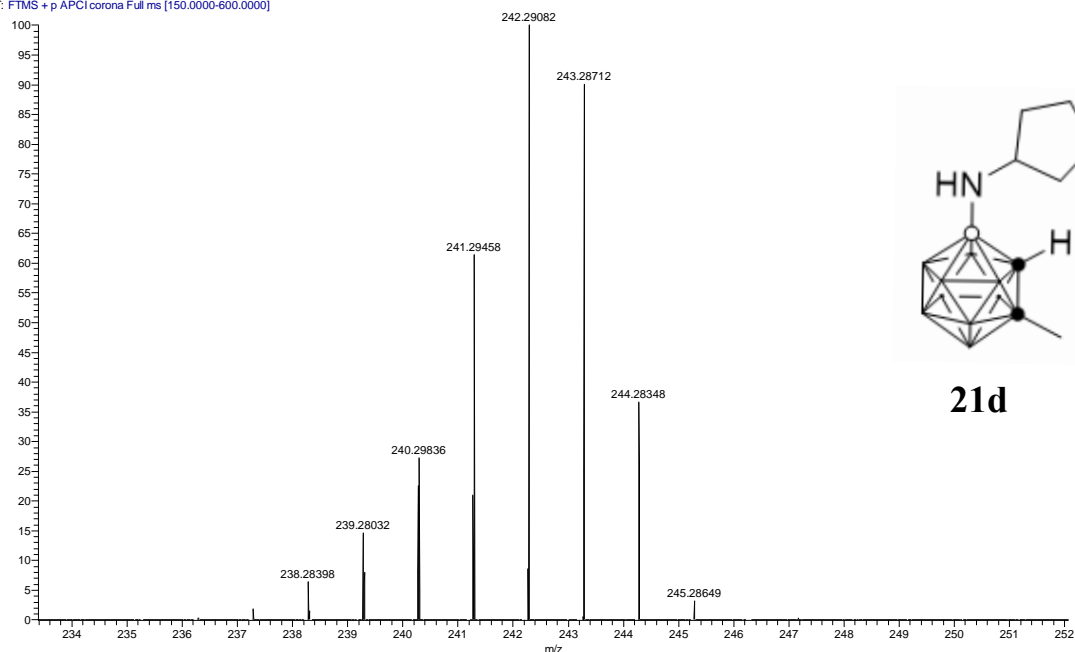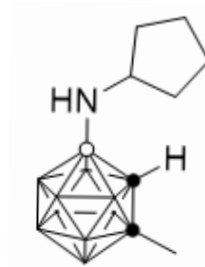

21d

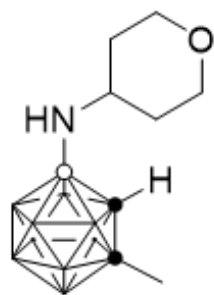

**22d**

$^3\text{J}$  'POT' %622'OJ | .'E8F 8+

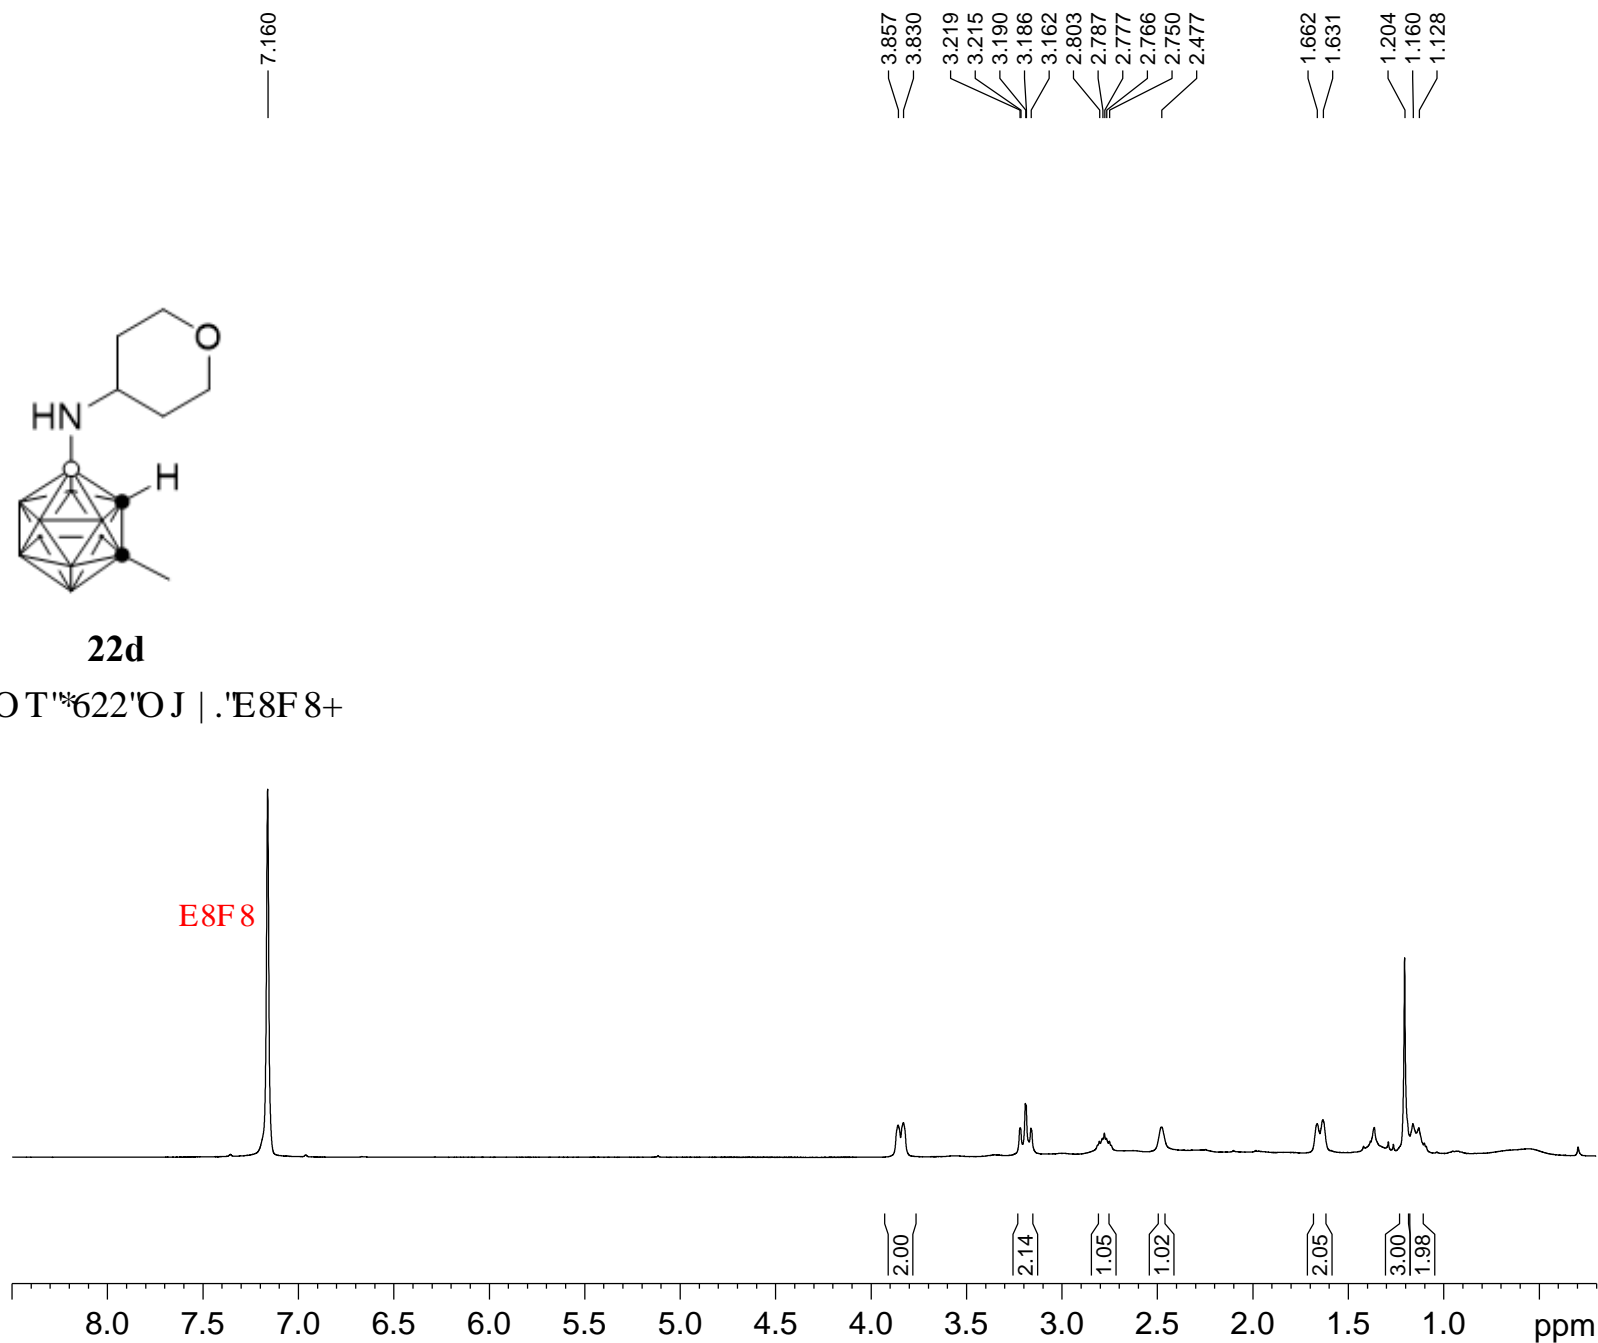

lhr-H-0581-1-cc-C6D

Current Data Parameters

NAME lhr-H-0581-1-cc-C6  
EXPNO 1  
PROCNO 1

F2 - Acquisition Parameters

Date\_ 20170101  
Time 16.34 h  
INSTRUM spect  
PROBHD Z108618\_0257 (  
PULPROG zg30  
TD 65536  
SOLVENT C6D6  
NS 20  
DS 2  
SWH 8012.820 Hz  
FIDRES 0.122266 Hz  
AQ 4.0894465 sec  
RG 128  
DW 62.400 usec  
DE 6.50 usec  
TE 294.1 K  
D1 1.00000000 sec  
TD0 1  
SFO1 400.2324714 MHz  
NUC1 1H  
P1 12.80 usec  
PLW1 13.56000042 W

F2 - Processing parameters

SI 65536  
SF 400.2299971 MHz  
WDW EM  
SSB 0  
LB 0.30 Hz  
GB 0  
PC 1.00

1hr-C-0581-1-cc-C6I

Current Data Parameters  
NAME 1hr-C-0581-1-cc-C6D6  
EXPNO 1  
PROCNO 1

F2 - Acquisition Parameters  
Date\_ 20170101  
Time 16.41 h  
INSTRUM spect  
PROBHD Z108618\_0257 (  
PULPROG zgpg30  
TD 65536  
SOLVENT C6D6  
NS 3769  
DS 4  
SWH 29761.904 Hz  
FIDRES 0.454131 Hz  
AQ 1.1010048 sec  
RG 203  
DW 16.800 usec  
DE 6.50 usec  
TE 294.7 K  
D1 2.0000000 sec  
D11 0.0300000 sec  
TD0 1  
SFO1 100.6479773 MHz  
NUC1 13C  
P1 9.50 usec  
PLW1 55.3400015 W  
SFO2 400.2316009 MHz  
NUC2 1H  
CPDPRG[2] waltz16  
PCPD2 90.00 usec  
PLW2 13.56000042 W  
PLW12 0.27428001 W  
PLW13 0.13796000 W

F2 - Processing parameters  
SI 32768  
SF 100.6378775 MHz  
WDW EM  
SSB 0  
LB 1.00 Hz  
GB 0  
PC 1.40

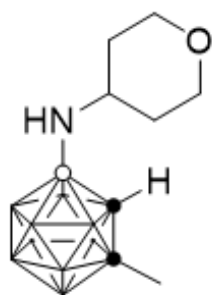

22d

$^{35}\text{E} \} ^3\text{J} ; \text{'POT} * 322 \text{'OJ} | . \text{'E6D6+}$

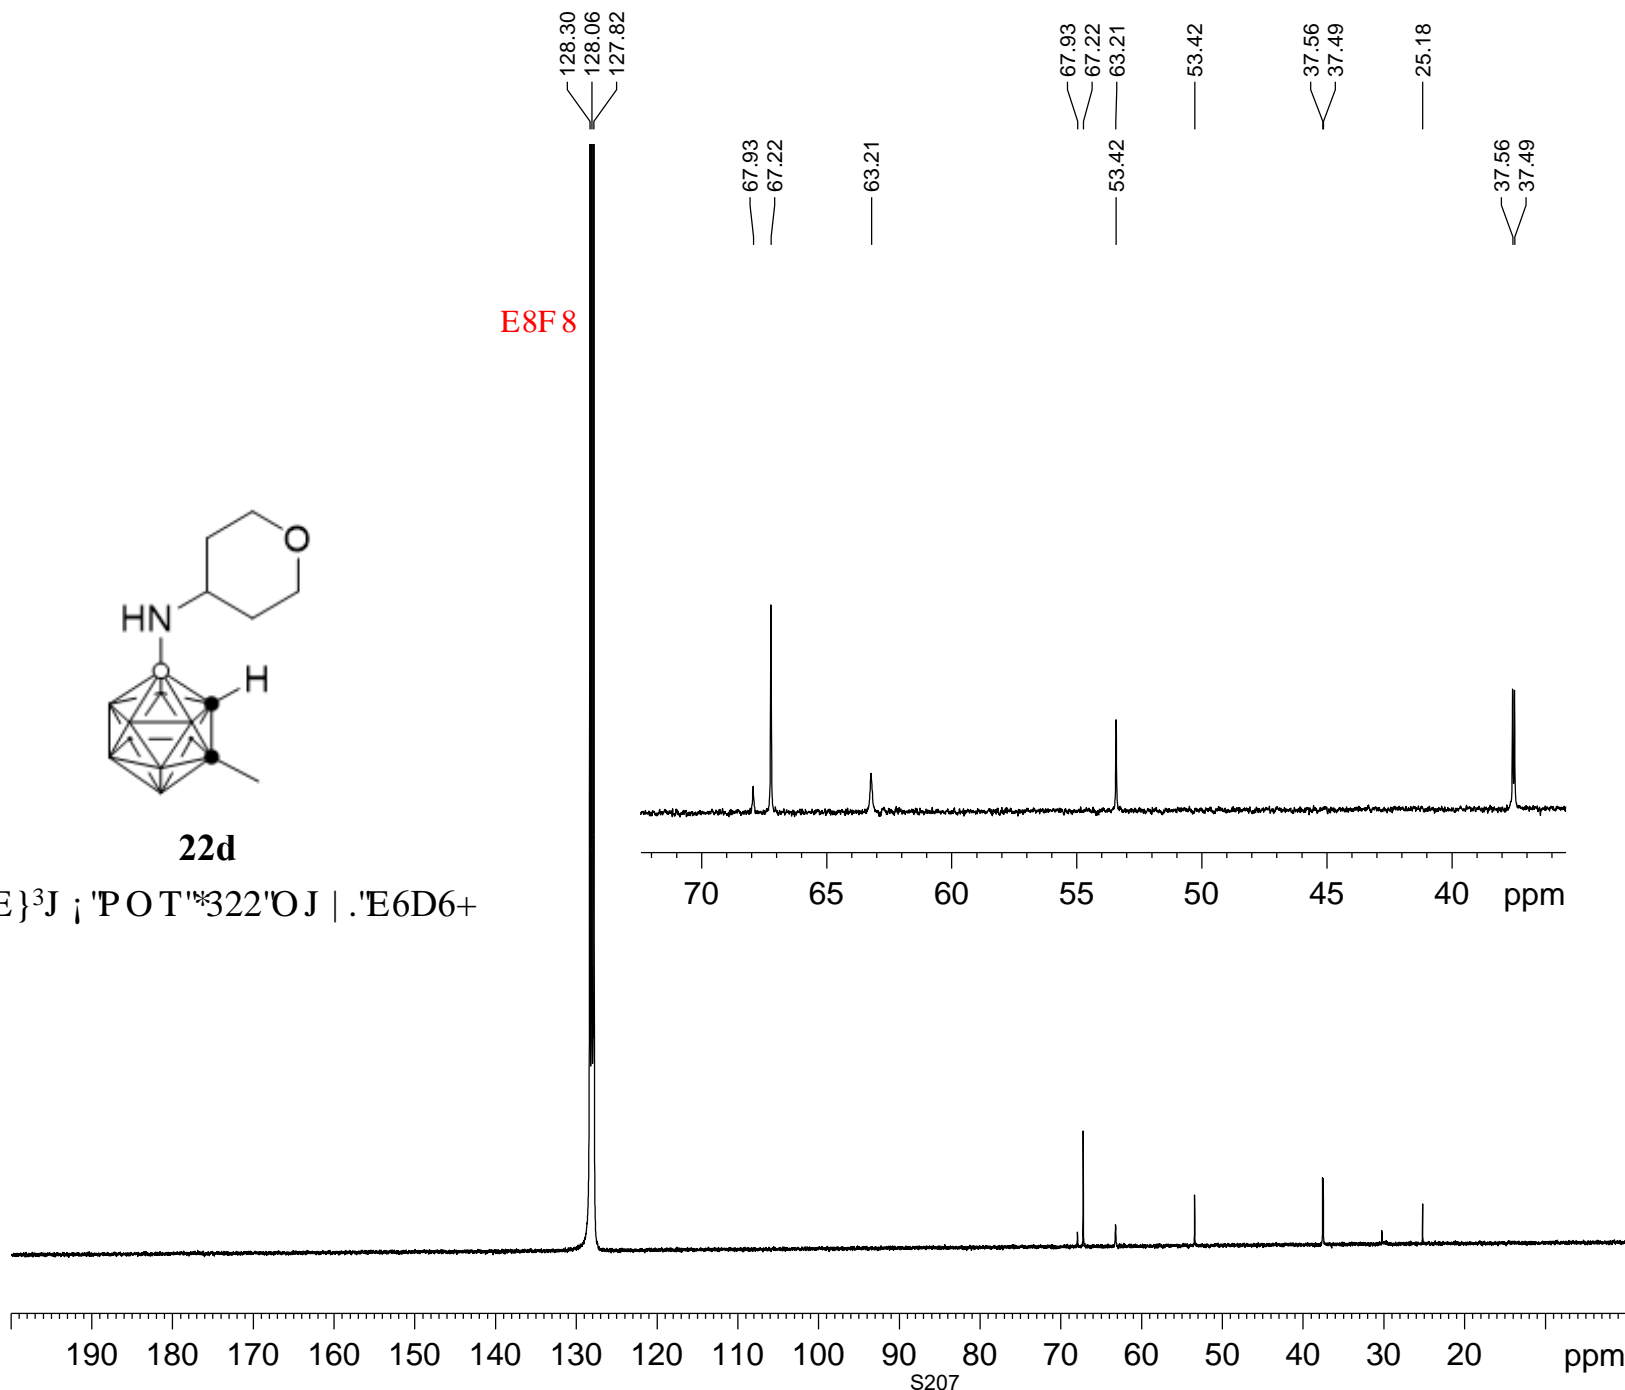

1hr-B-0581-1-cc-C6D6

Current Data Parameters  
NAME 1hr-B-0581-1-cc-C6D6  
EXPNO 1  
PROCNO 1

F2 - Acquisition Parameters  
Date\_ 20170101  
Time 20.33 h  
INSTRUM spect  
PROBHD Z108618\_0257 (  
PULPROG zgdc  
TD 65536  
SOLVENT CDCl3  
NS 43  
DS 4  
SWH 24038.461 Hz  
FIDRES 0.366798 Hz  
AQ 1.3631488 sec  
RG 287  
DW 20.800 usec  
DE 6.50 usec  
TE 295.8 K  
D1 2.0000000 sec  
D11 0.0300000 sec  
TD0 1  
SFO1 128.4096890 MHz  
NUC1 11B  
P1 7.50 usec  
PLW1 55.09999847 W  
SFO2 400.2316009 MHz  
NUC2 1H  
CPDPRG[2] waltz16  
PCPD2 90.00 usec  
PLW2 13.56000042 W  
PLW12 0.27428001 W

F2 - Processing parameters  
SI 32768  
SF 128.4097615 MHz  
WDW EM  
SSB 0  
LB 1.00 Hz  
GB 0  
PC 1.40

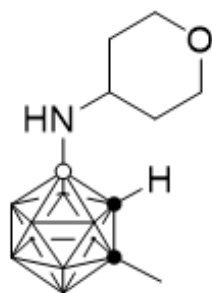

22d

$^{33}\text{D}\}^3\text{J}; \text{'POT}^{\text{M}}\text{34: 'OJ | .E6D6+}$

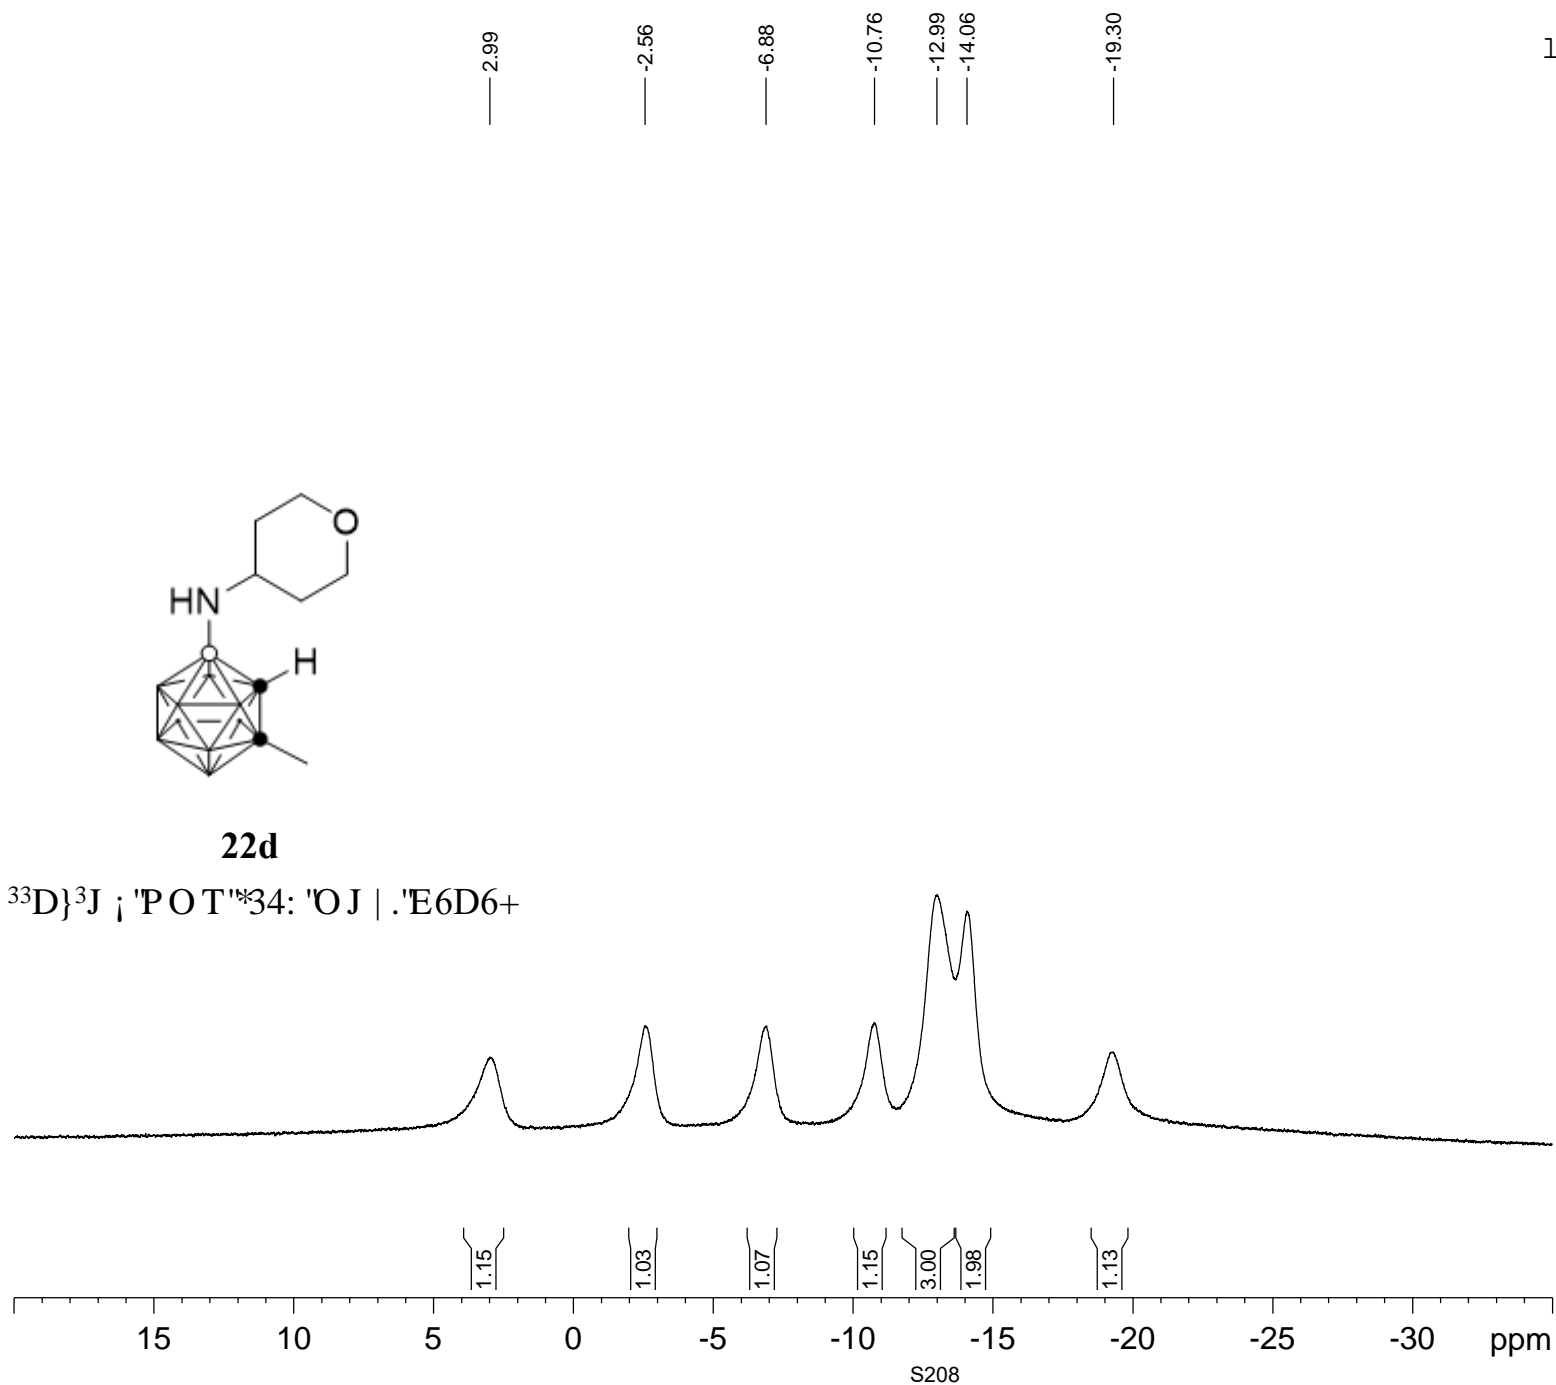

S208

lhr-B-0581-1-cc-C6D6(C)

Current Data Parameters  
NAME lhr-B-0581-1-cc-C6D6(C)  
EXPNO 1  
PROCNO 1

F2 - Acquisition Parameters  
Date\_ 20170101  
Time 20.35 h  
INSTRUM spect  
PROBHD Z108618\_0257 (  
PULPROG zg  
TD 65536  
SOLVENT CDCl3  
NS 95  
DS 2  
SWH 24038.461 Hz  
FIDRES 0.366798 Hz  
AQ 1.3631488 sec  
RG 406  
DW 20.800 usec  
DE 6.50 usec  
TE 295.3 K  
D1 2.00000000 sec  
TD0 1  
SFO1 128.4096890 MHz  
NUC1 11B  
P1 7.50 usec  
PLW1 55.09999847 W

F2 - Processing parameters  
SI 32768  
SF 128.4097504 MHz  
WDW EM  
SSB 0  
LB 1.00 Hz  
GB 0  
PC 1.40

3.09  
-1.90  
-3.02  
-6.18  
-7.30  
-10.06  
-11.24  
-12.21  
-13.36  
-14.57  
-18.48  
-19.75

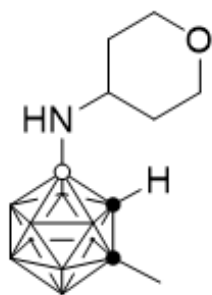

22d

$^{33}\text{D}^{\text{POT}}*34: \text{'OJ} | \text{'E6D6+}$

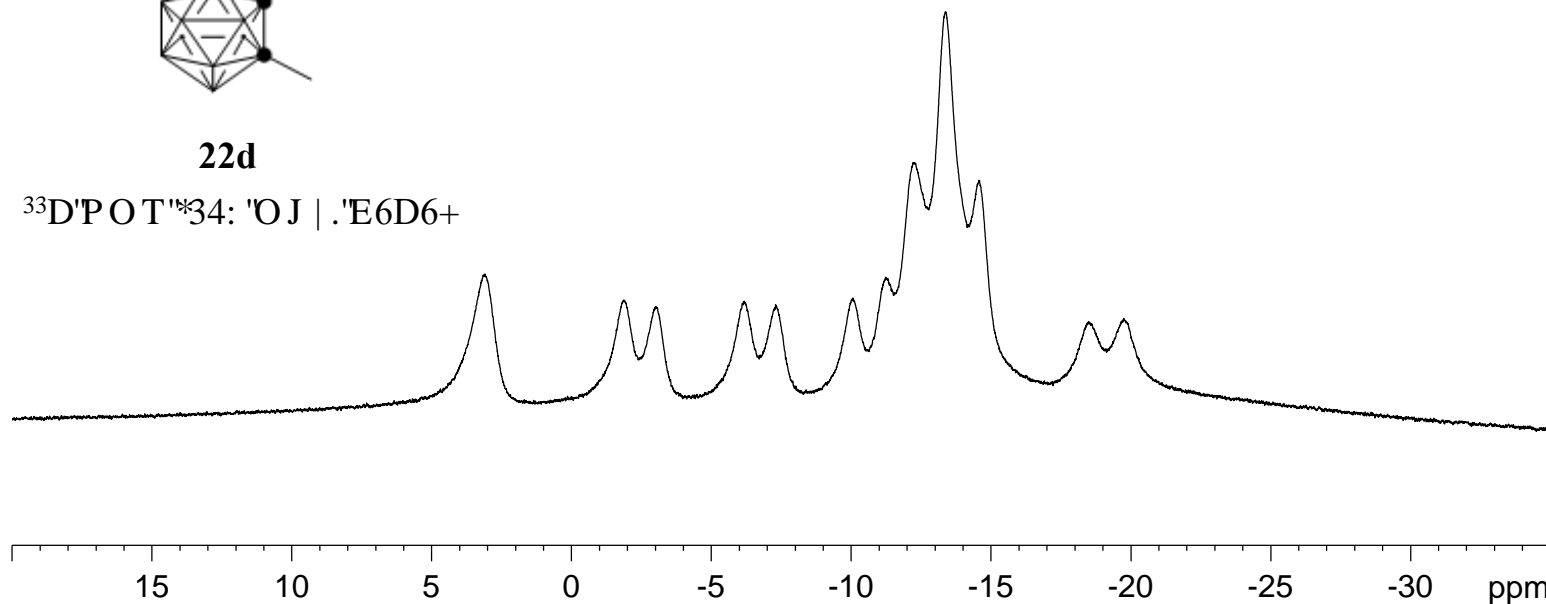

zwx2651 #3 RT: 0.29 AV: 1 NL: 2.95E6  
T: + c EI Full ms [ 79.50-400.50]

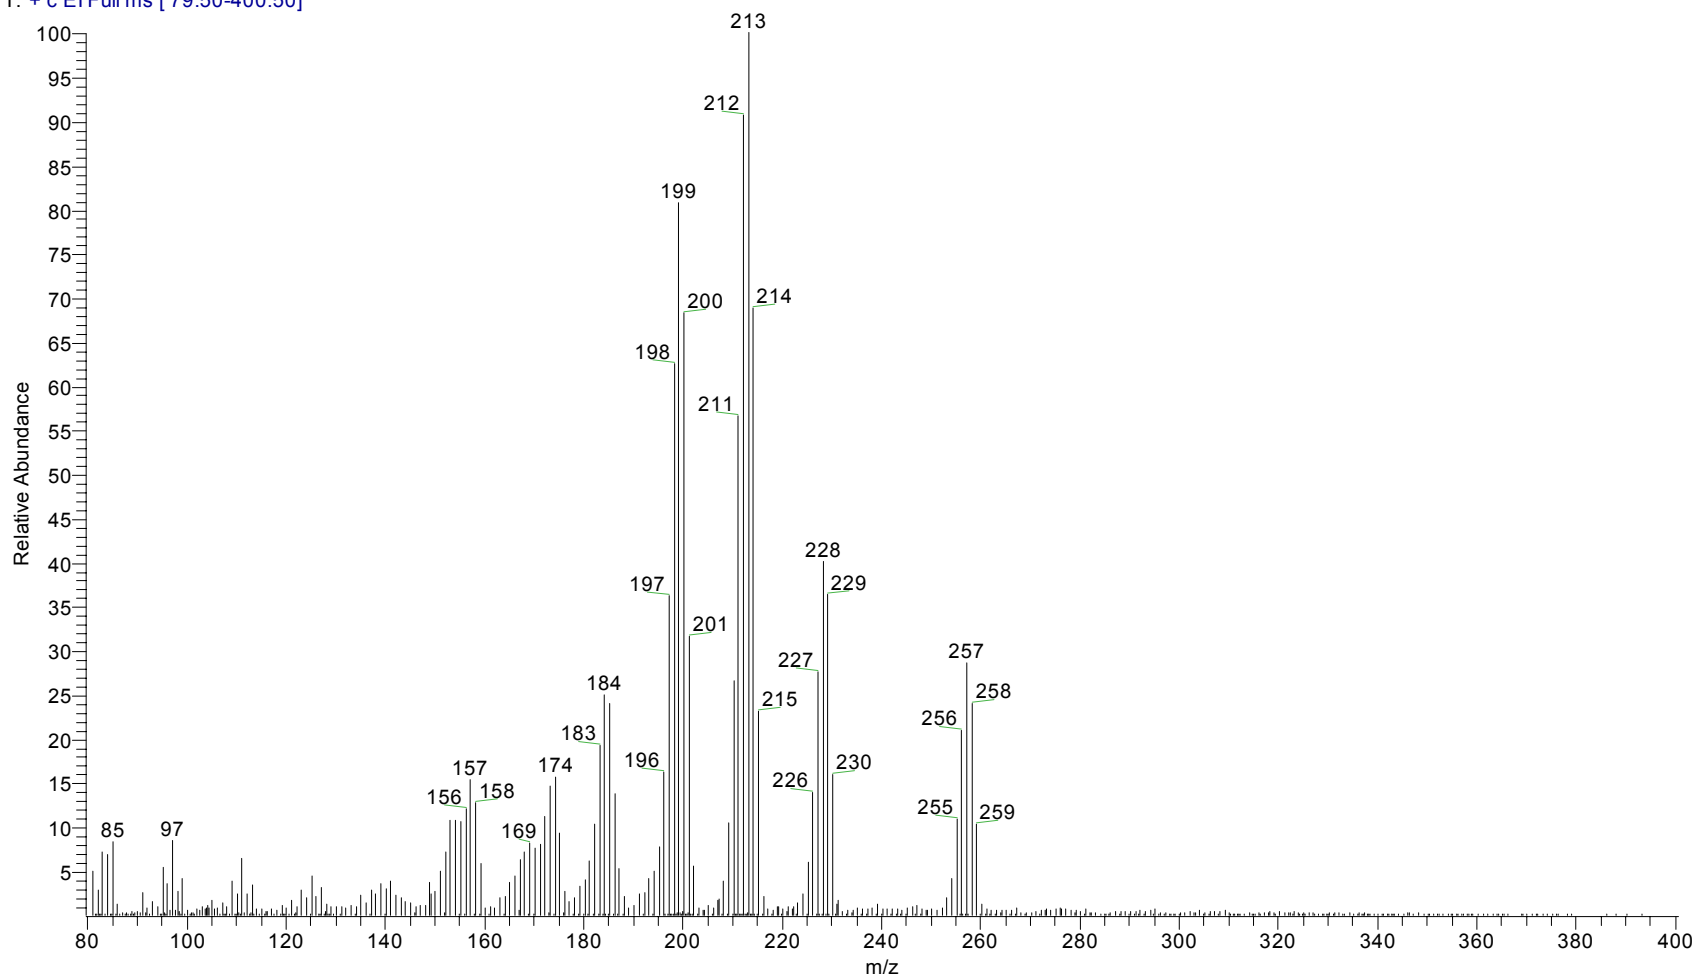

zwx2651 #3 RT: 0.29 AV: 1 NL: 8.42E5  
T: + c EI Full ms [ 79.50-400.50]

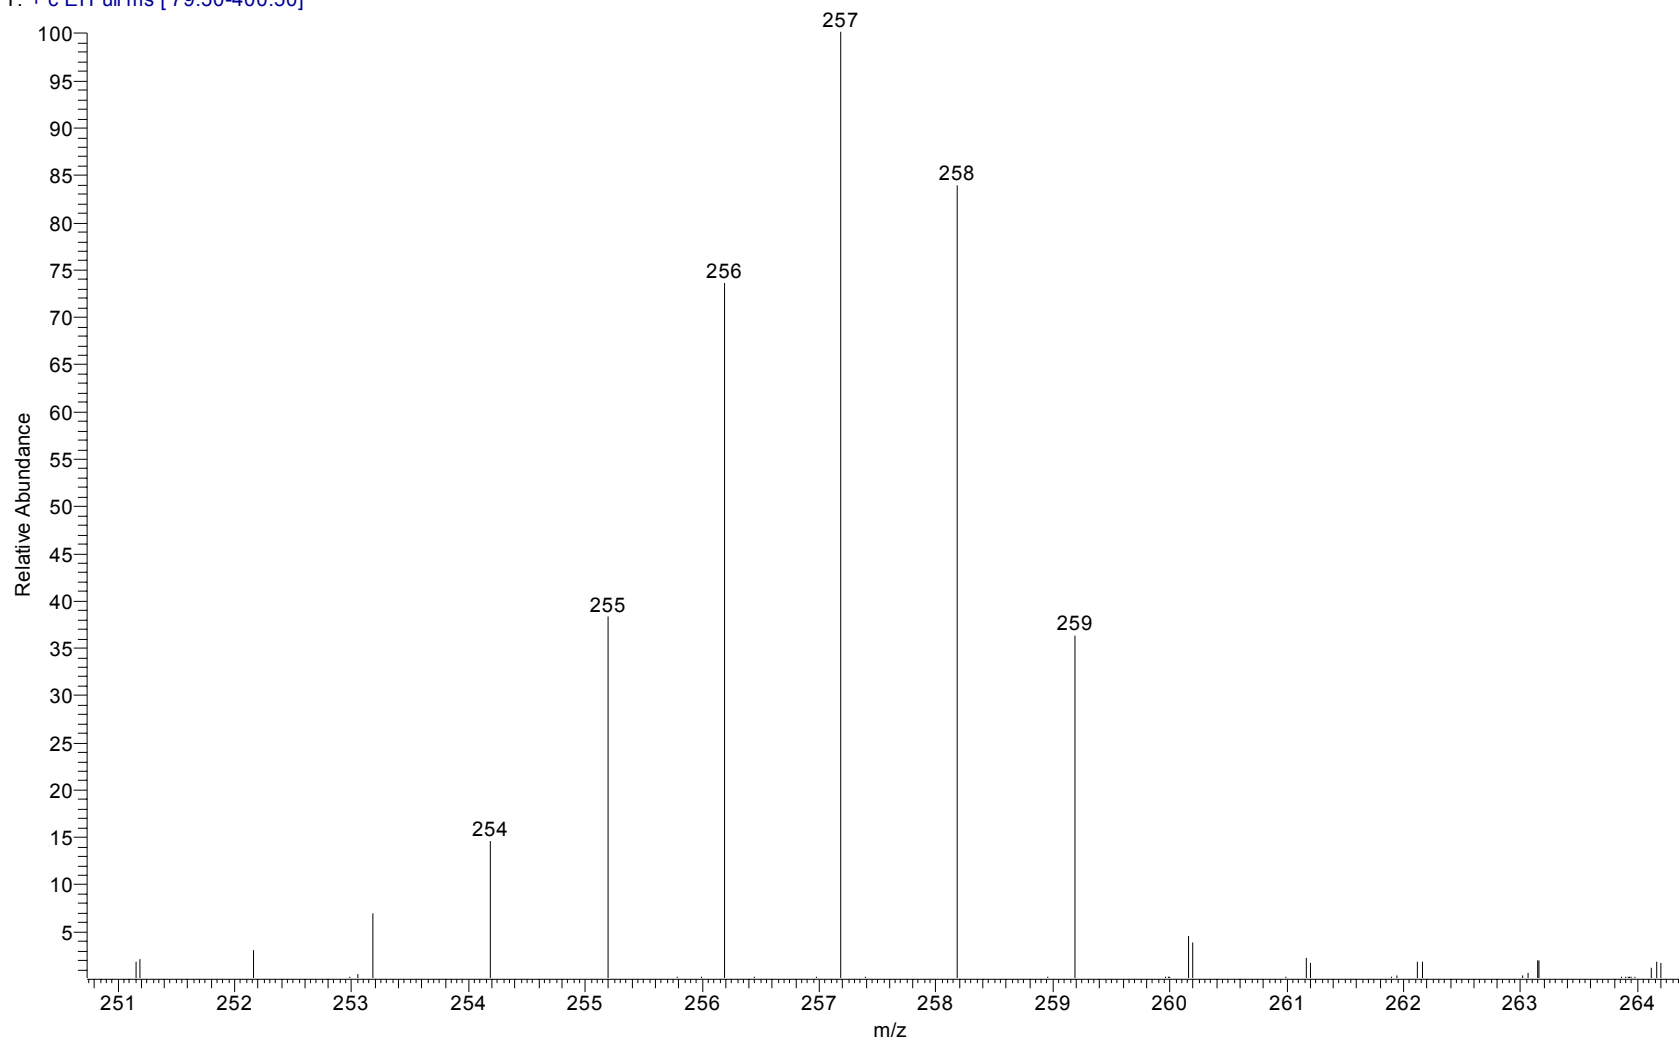

## Accurate Mass Measurement

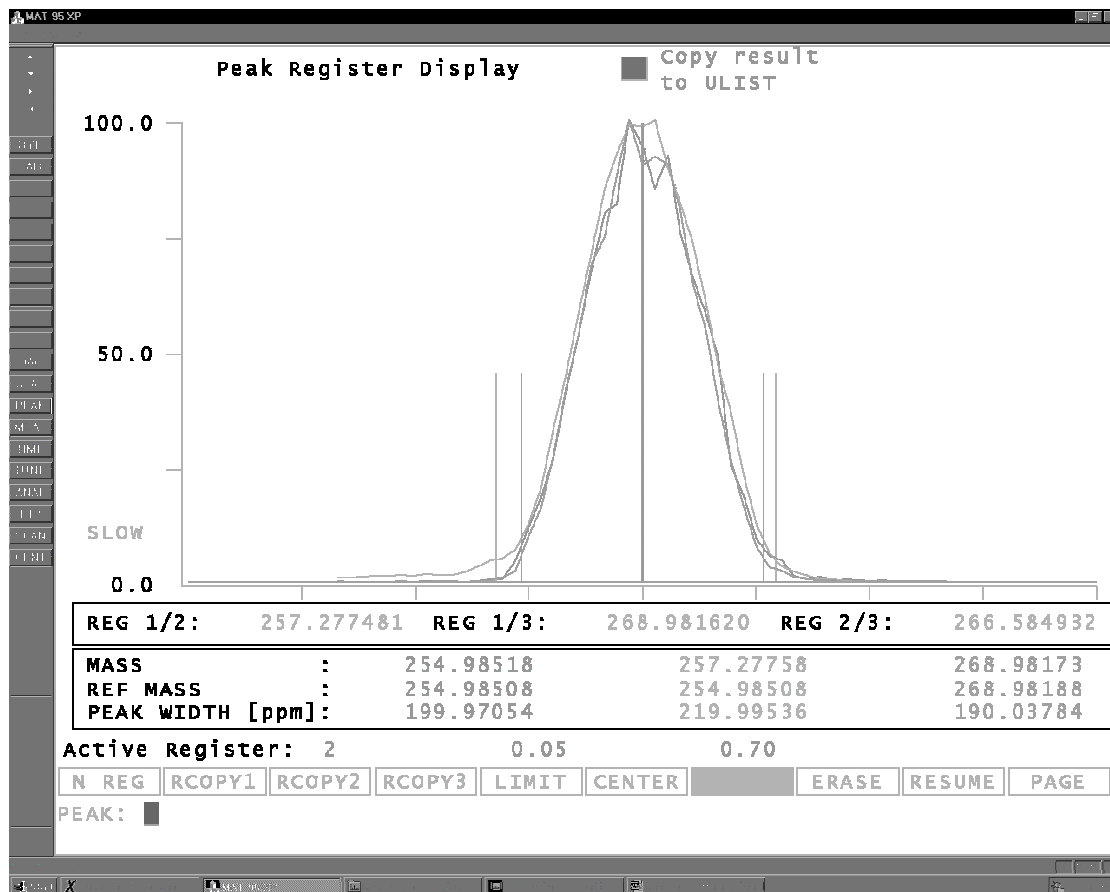

Molecular formula  
C<sub>8</sub>H<sub>23</sub>B<sub>10</sub>NO  
[M]<sup>+</sup> (theoretical)  
= 257.2777

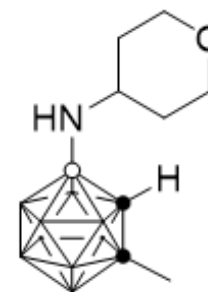

22d



lhr-H-0580-cc-C6D6.1.1.1r  
lhr-H-0580-cc-C6D6

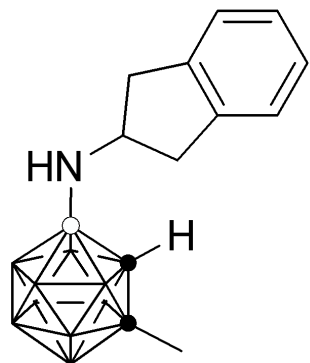

**23d**

$^3\text{J}$  POT 622 OJ |  $^1\text{C}_6\text{D}_6$

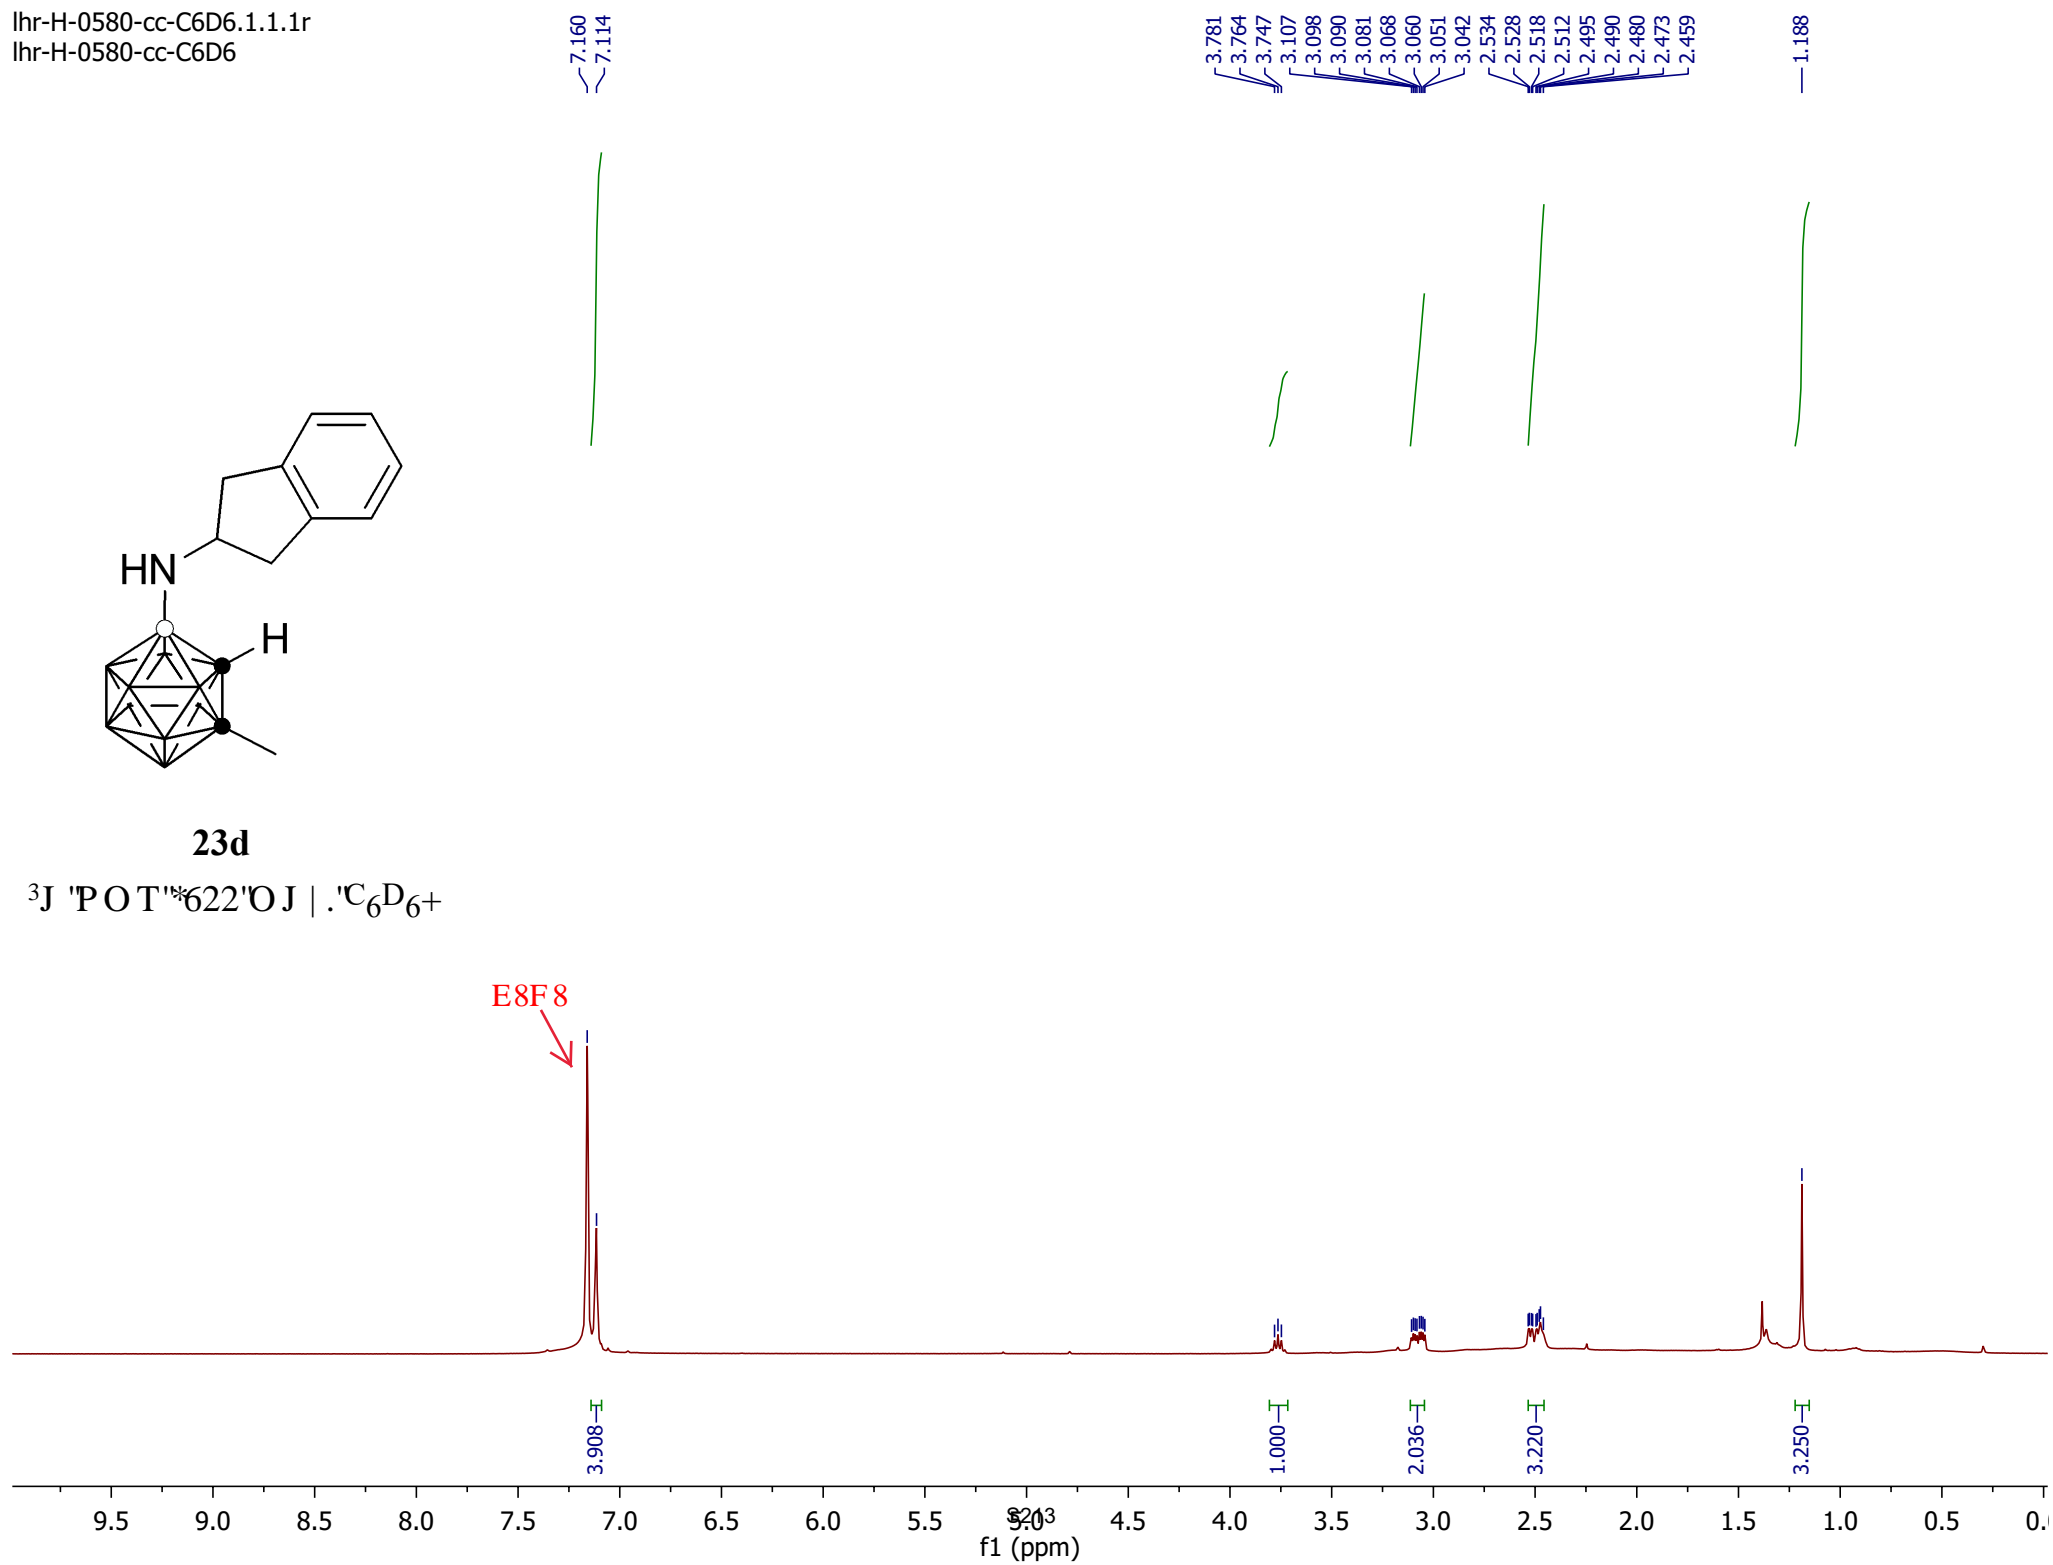





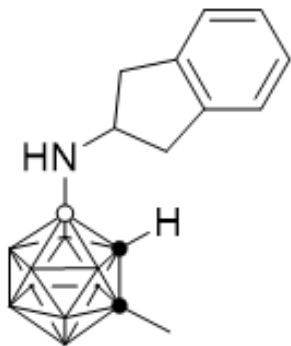

**23d**

$^{33}\text{D}'\text{POT}^*34: \text{'OJ} | .\text{'E6D6+}$

— 2.98  
 — -2.09  
 — -3.24  
 — -6.28  
 — -7.50  
 — -10.16  
 — -11.33  
 — -12.28  
 — -13.44  
 — -14.66  
 — -18.58  
 — -19.82

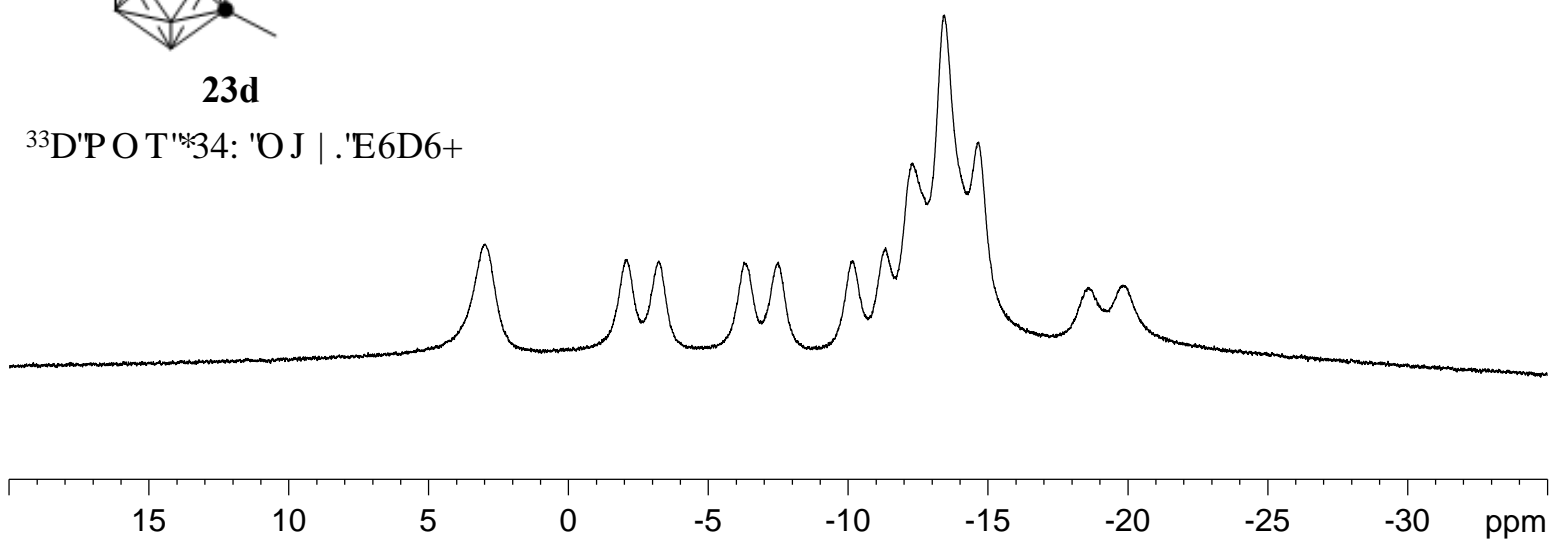

lhr-B-0580-cc-C6D6(C)

Current Data Parameters  
 NAME lhr-B-0580-cc-C6D6(C)  
 EXPNO 1  
 PROCNO 1

F2 - Acquisition Parameters  
 Date\_ 20170103  
 Time 19.10 h  
 INSTRUM spect  
 PROBHD z108618\_0257 (  
 PULPROG zg  
 TD 65536  
 SOLVENT C6D6  
 NS 58  
 DS 2  
 SWH 24038.461 Hz  
 FIDRES 0.366798 Hz  
 AQ 1.3631488 sec  
 RG 362  
 DW 20.800 usec  
 DE 6.50 usec  
 TE 294.7 K  
 D1 2.00000000 sec  
 TD0 1  
 SF01 128.4096890 MHz  
 NUC1 11B  
 P1 7.50 usec  
 PLW1 55.09999847 W

F2 - Processing parameters  
 SI 32768  
 SF 128.4097504 MHz  
 WDW EM  
 SSB 0  
 LB 1.00 Hz  
 GB 0  
 PC 1.40

zwx2652 #1 RT: 0.13 AV: 1 NL: 1.92E6  
T: + c EI Full ms [ 79.50-400.50]

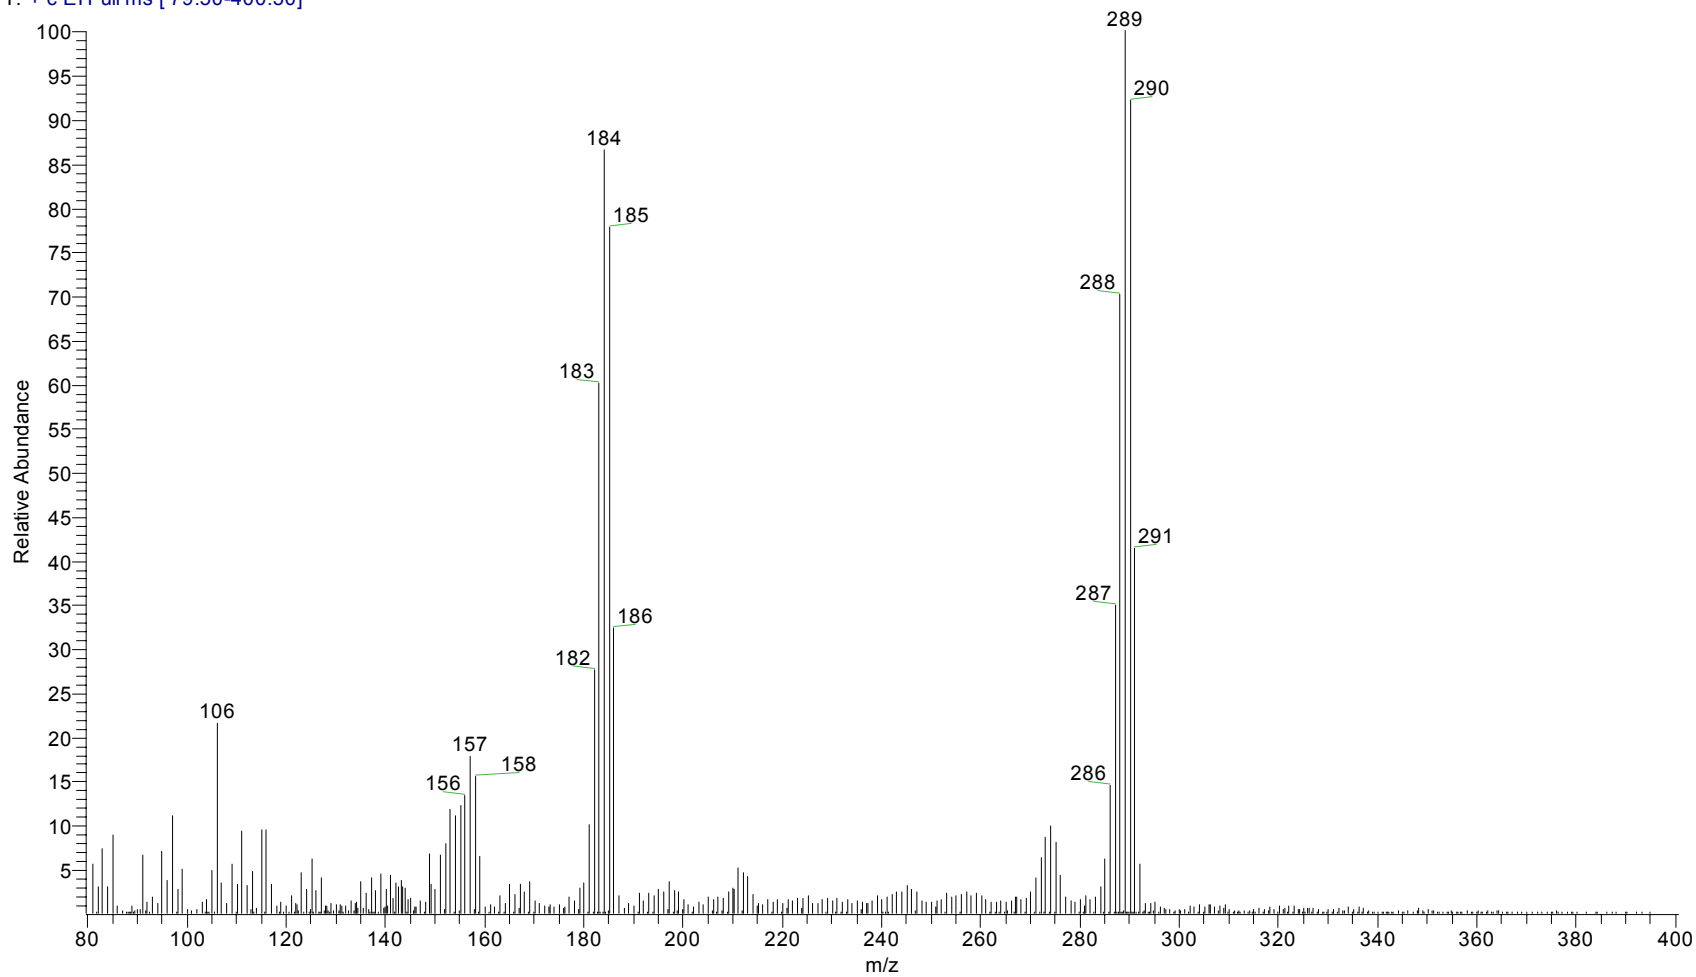

zwx2652 #1 RT: 0.13 AV: 1 NL: 1.92E6  
T: + c EI Full ms [ 79.50-400.50]

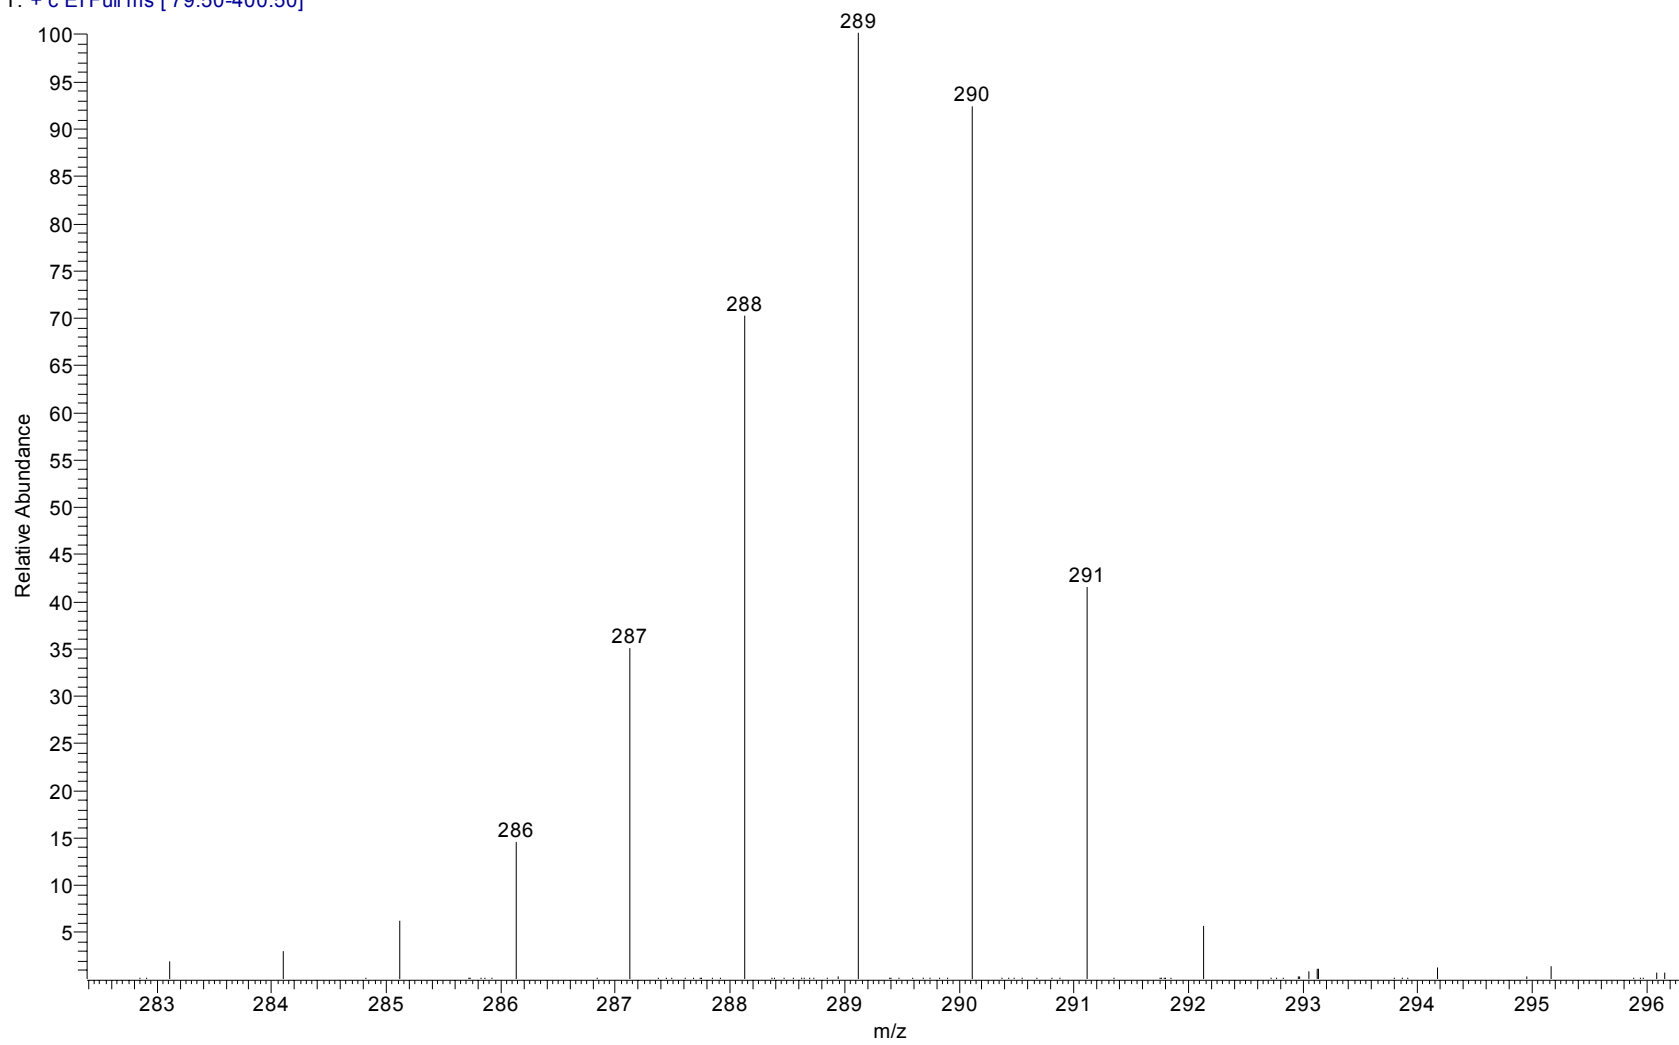

## Accurate Mass Measurement

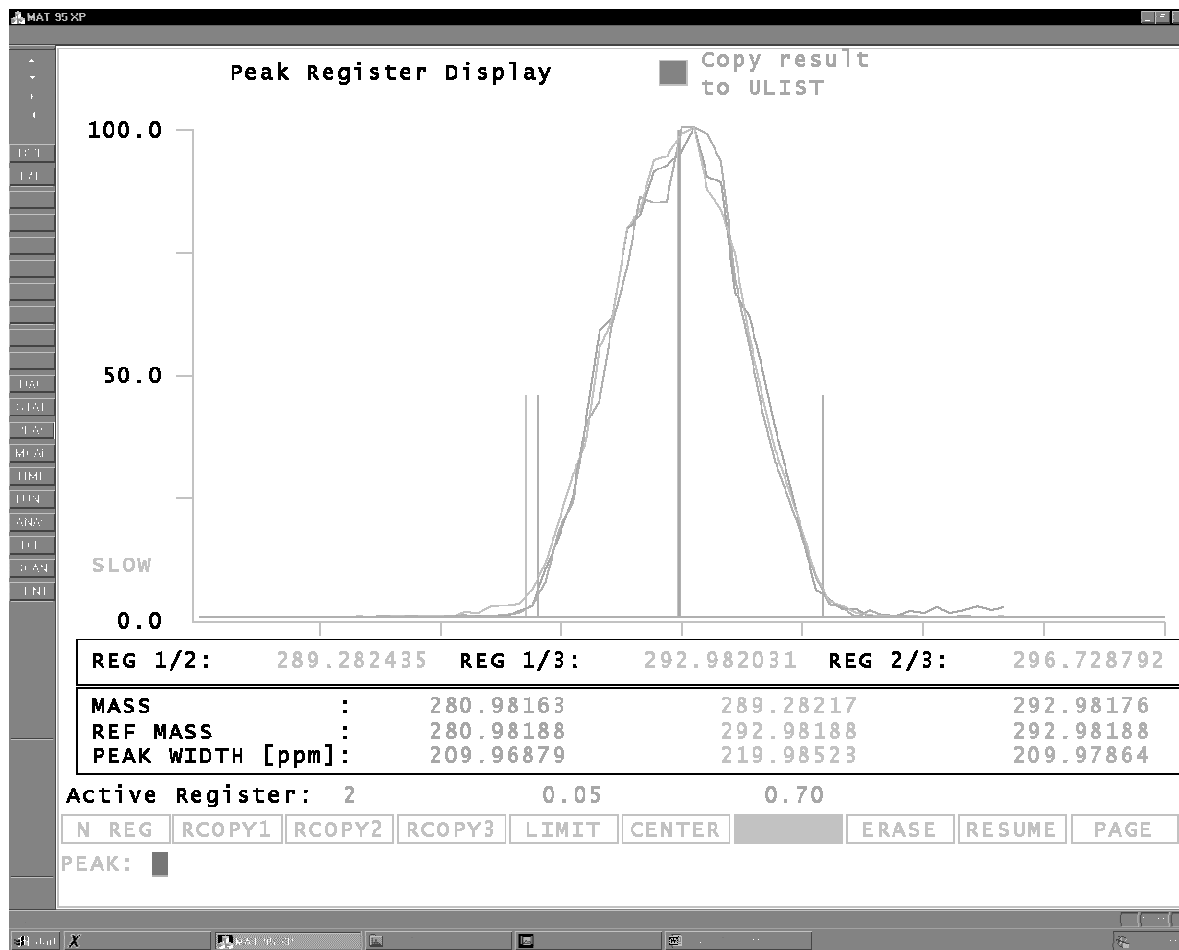

Molecular formula  
 $C_{12}H_{23}B_{10}N$   
 $[M]^+$  (theoretical)  
= 289.2828

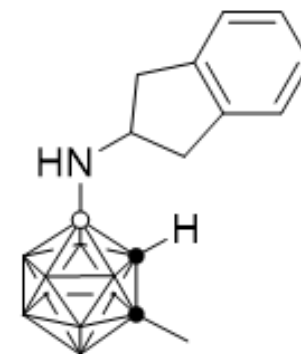

23d

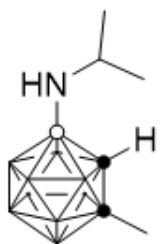

**24d**

$^3\text{J}$  'POT'\*622'OJ | .'C<sub>6</sub>D<sub>6</sub>+

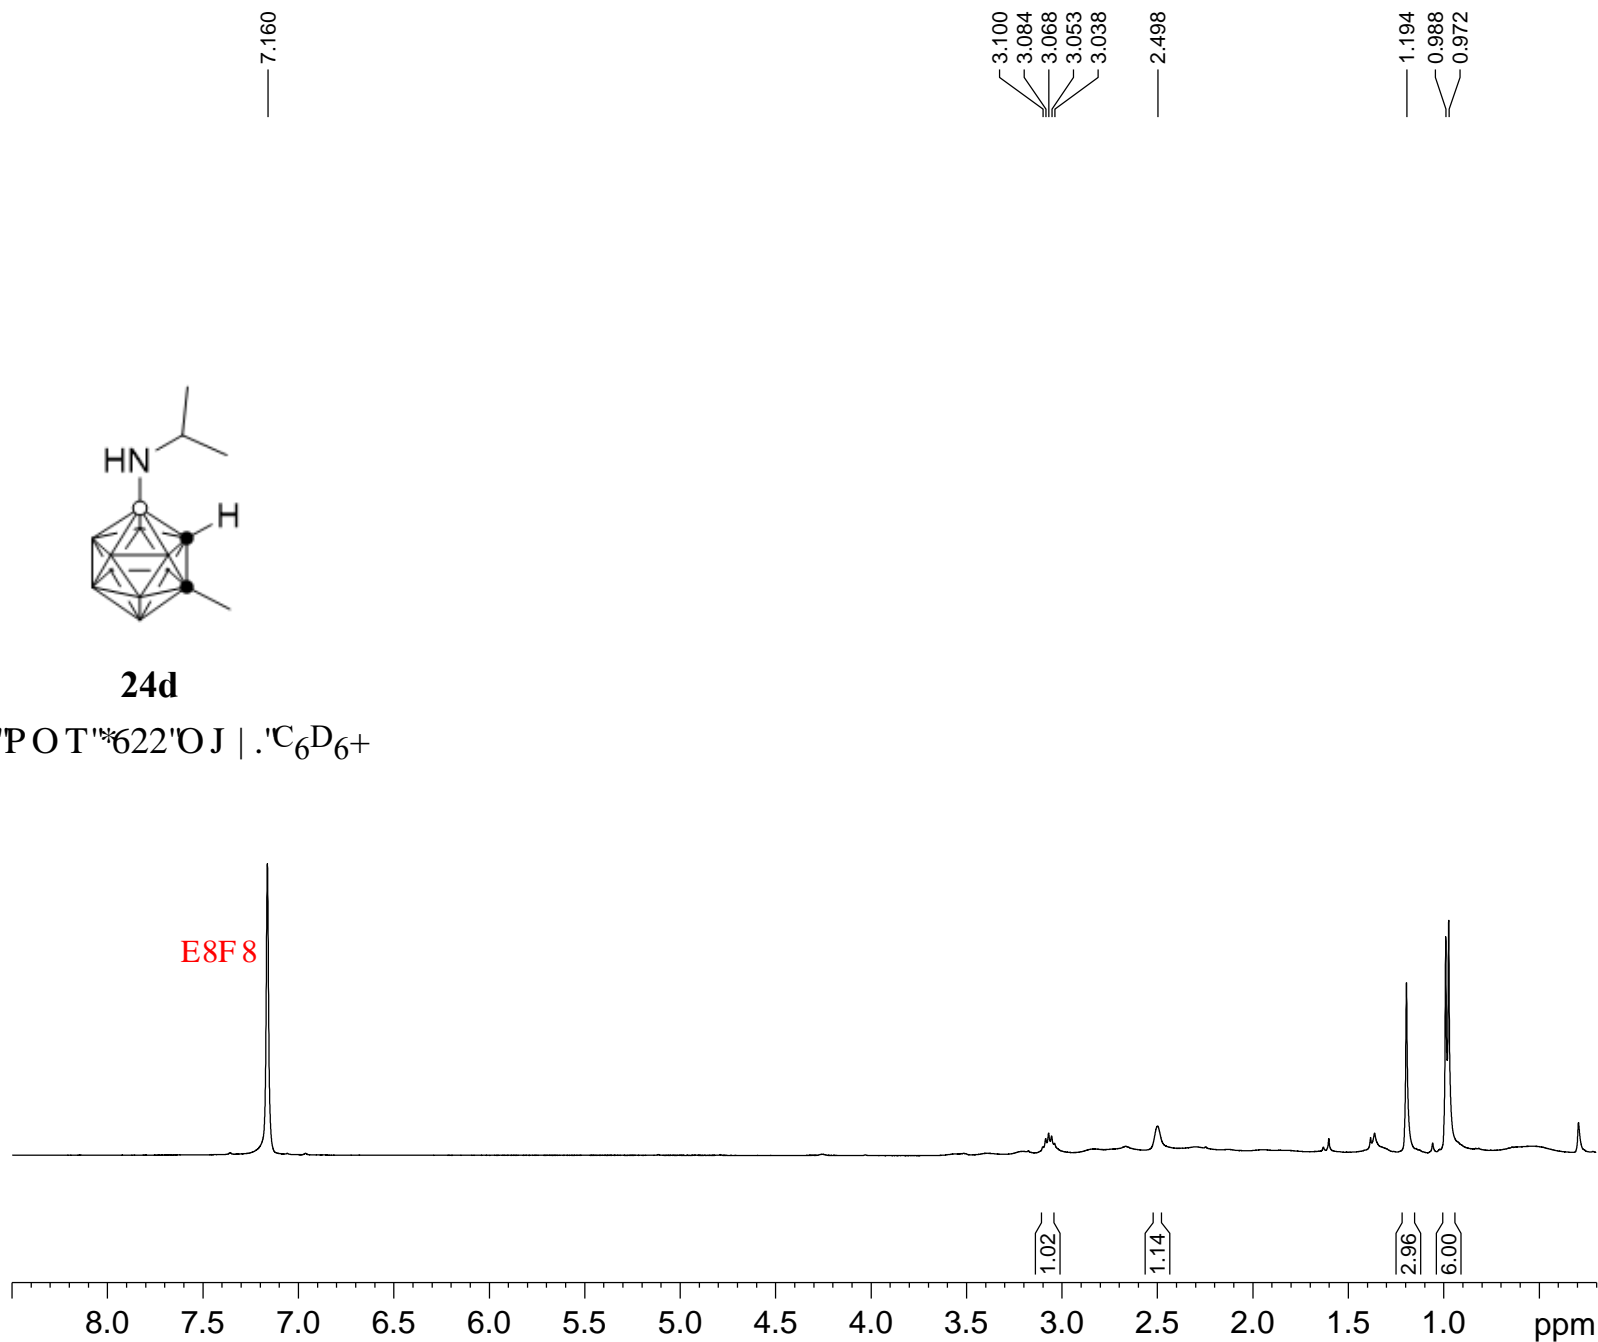

lhr-H-0596-cc-C6D6

Current Data Parameters  
 NAME lhr-H-0596-cc-C6D  
 EXPNO 1  
 PROCNO 1

F2 - Acquisition Parameters  
 Date\_ 20170119  
 Time 17.16 h  
 INSTRUM spect  
 PROBHD Z108618\_0257 (  
 PULPROG zg30  
 TD 65536  
 SOLVENT C6D6  
 NS 12  
 DS 2  
 SWH 8012.820 Hz  
 FIDRES 0.122266 Hz  
 AQ 4.0894465 sec  
 RG 101  
 DW 62.400 usec  
 DE 6.50 usec  
 TE 294.8 K  
 D1 1.00000000 sec  
 TD0 1  
 SFO1 400.2324714 MHz  
 NUC1 <sup>1</sup>H  
 P1 12.80 usec  
 PLW1 13.56000042 W

F2 - Processing parameters  
 SI 65536  
 SF 400.2299981 MHz  
 WDW EM  
 SSB 0  
 LB 0.30 Hz  
 GB 0  
 PC 1.00



lhr-C-0596-cc-C6D6

Bruker Advance III 400

Current Data Parameters  
NAME lhr-C-0596-cc-C6D6  
EXPNO 1  
PROCNO 1

F2 - Acquisition Parameters  
Date\_ 20170119  
Time 17.27 h  
INSTRUM spect  
PROBHD Z824601\_0021 (  
PULPROG zgpg30  
TD 65536  
SOLVENT C6D6  
NS 1411  
DS 4  
SWH 24038.461 Hz  
FIDRES 0.366798 Hz  
AQ 1.3631488 sec  
RG 203  
DW 20.800 usec  
DE 6.50 usec  
TE 295.3 K  
D1 2.00000000 sec  
D11 0.03000000 sec  
TD0 1  
SFO1 100.6228298 MHz  
NUC1 13C  
P1 9.50 usec  
PLW1 41.25000000 W  
SFO2 400.1316005 MHz  
NUC2 1H  
CPDPRG[2] waltz16  
PCPD2 90.00 usec  
PLW2 8.31000042 W  
PLW12 0.23083000 W  
PLW13 0.11611000 W

F2 - Processing parameters  
SI 32768  
SF 100.6127314 MHz  
WDW EM  
SSB 0  
LB 1.00 Hz  
GB 0  
PC 1.40

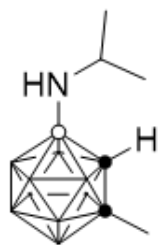

24d

$^{35}\text{E}\}_{3}\text{J}; \text{'POT'}*322\text{'OJ} | \text{'E6D6+}$

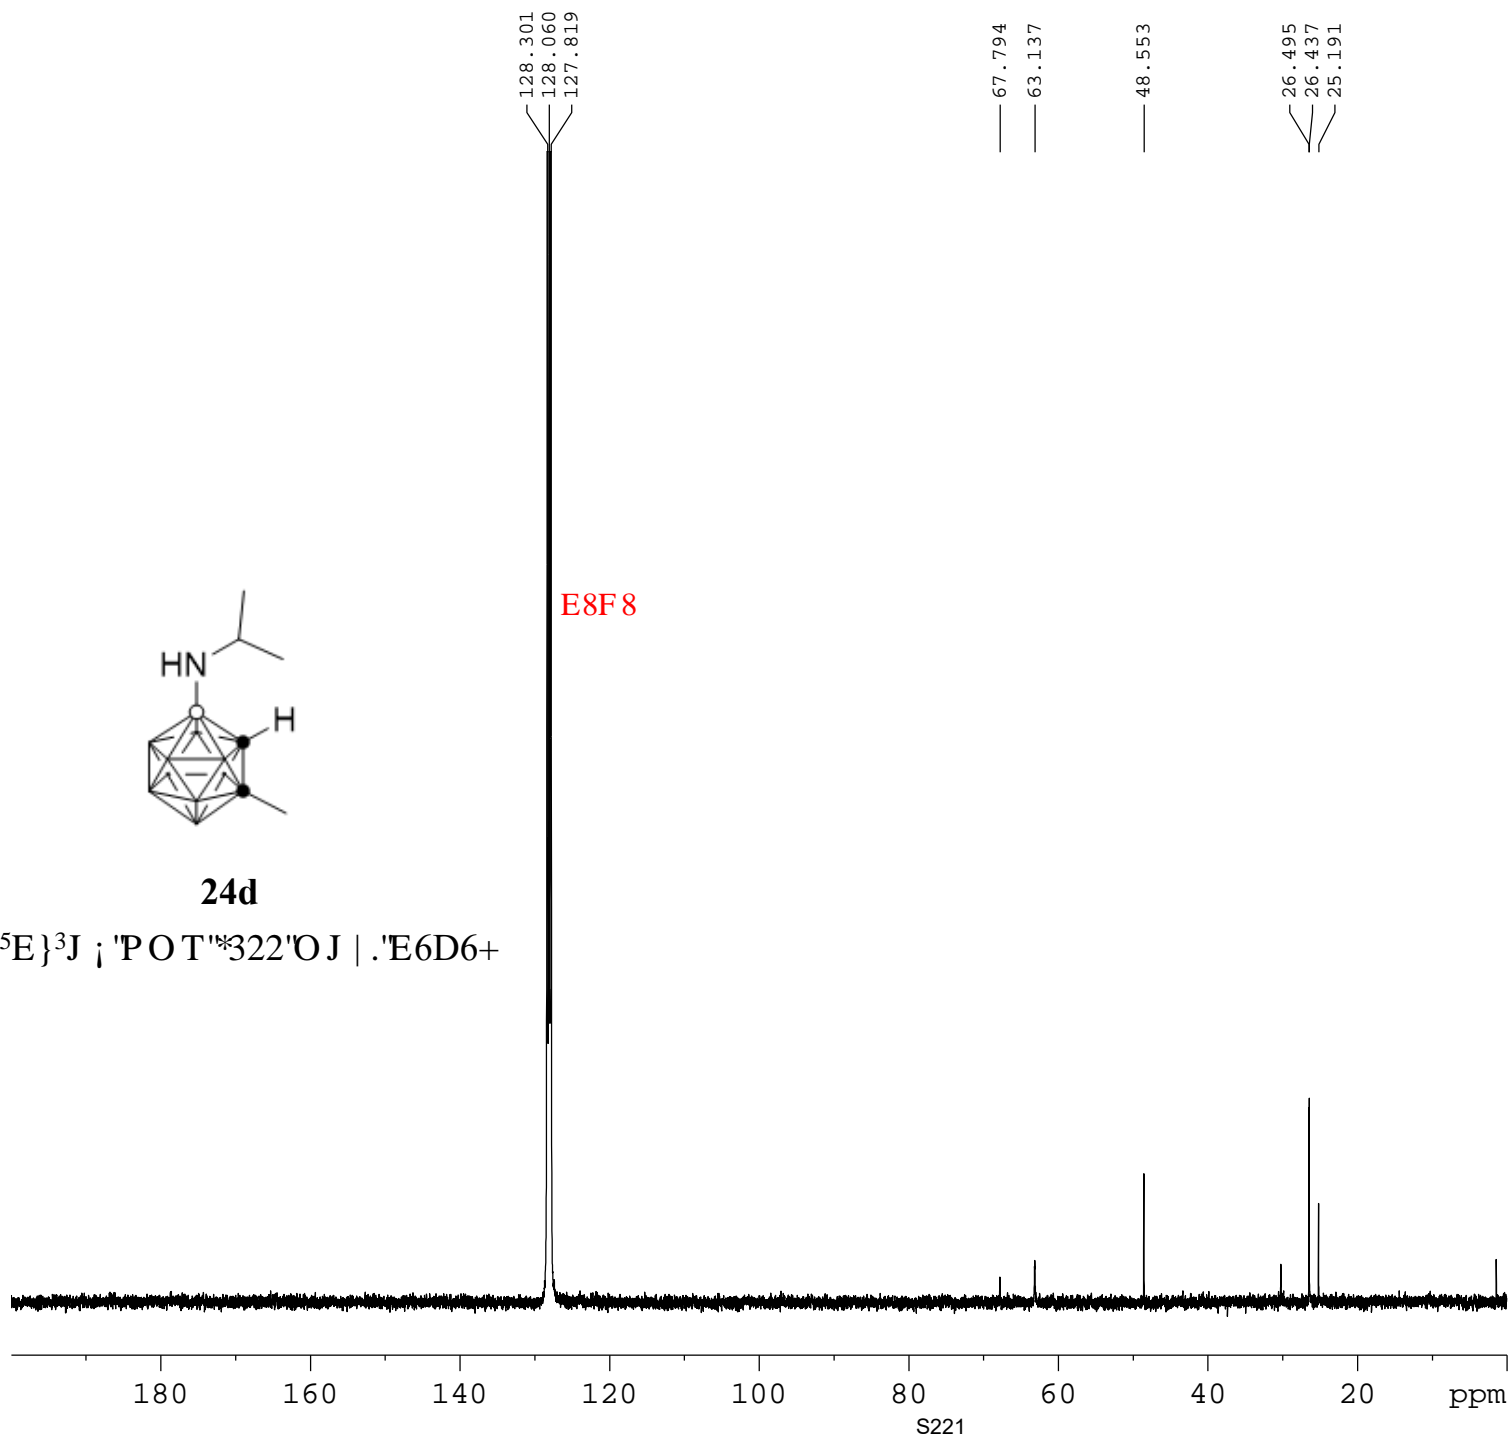

lhr-B-0596-cc-C6D6

Current Data Parameters  
NAME lhr-B-0596-cc-C6D6  
EXPNO 1  
PROCNO 1

F2 - Acquisition Parameters  
Date\_ 20170119  
Time 17.10 h  
INSTRUM spect  
PROBHD Z108618\_0257 (  
PULPROG zgdc  
TD 65536  
SOLVENT C6D6  
NS 16  
DS 4  
SWH 24038.461 Hz  
FIDRES 0.366798 Hz  
AQ 1.3631488 sec  
RG 287  
DW 20.800 usec  
DE 6.50 usec  
TE 295.1 K  
D1 2.00000000 sec  
D11 0.03000000 sec  
TD0 1  
SFO1 128.4096890 MHz  
NUC1 11B  
P1 7.50 usec  
PLW1 55.09999847 W  
SFO2 400.2316009 MHz  
NUC2 1H  
CPDPRG[2] waltz16  
PCPD2 90.00 usec  
PLW2 13.56000042 W  
PLW12 0.27428001 W

F2 - Processing parameters  
SI 32768  
SF 128.4097615 MHz  
WDW EM  
SSB 0  
LB 1.00 Hz  
GB 0  
PC 1.40

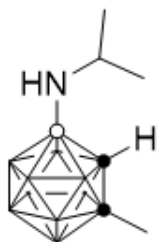

24d

$^{33}\text{D}$  }  $^3\text{J}$  ; 'POT' \*34: 'OJ | .'E6D6+

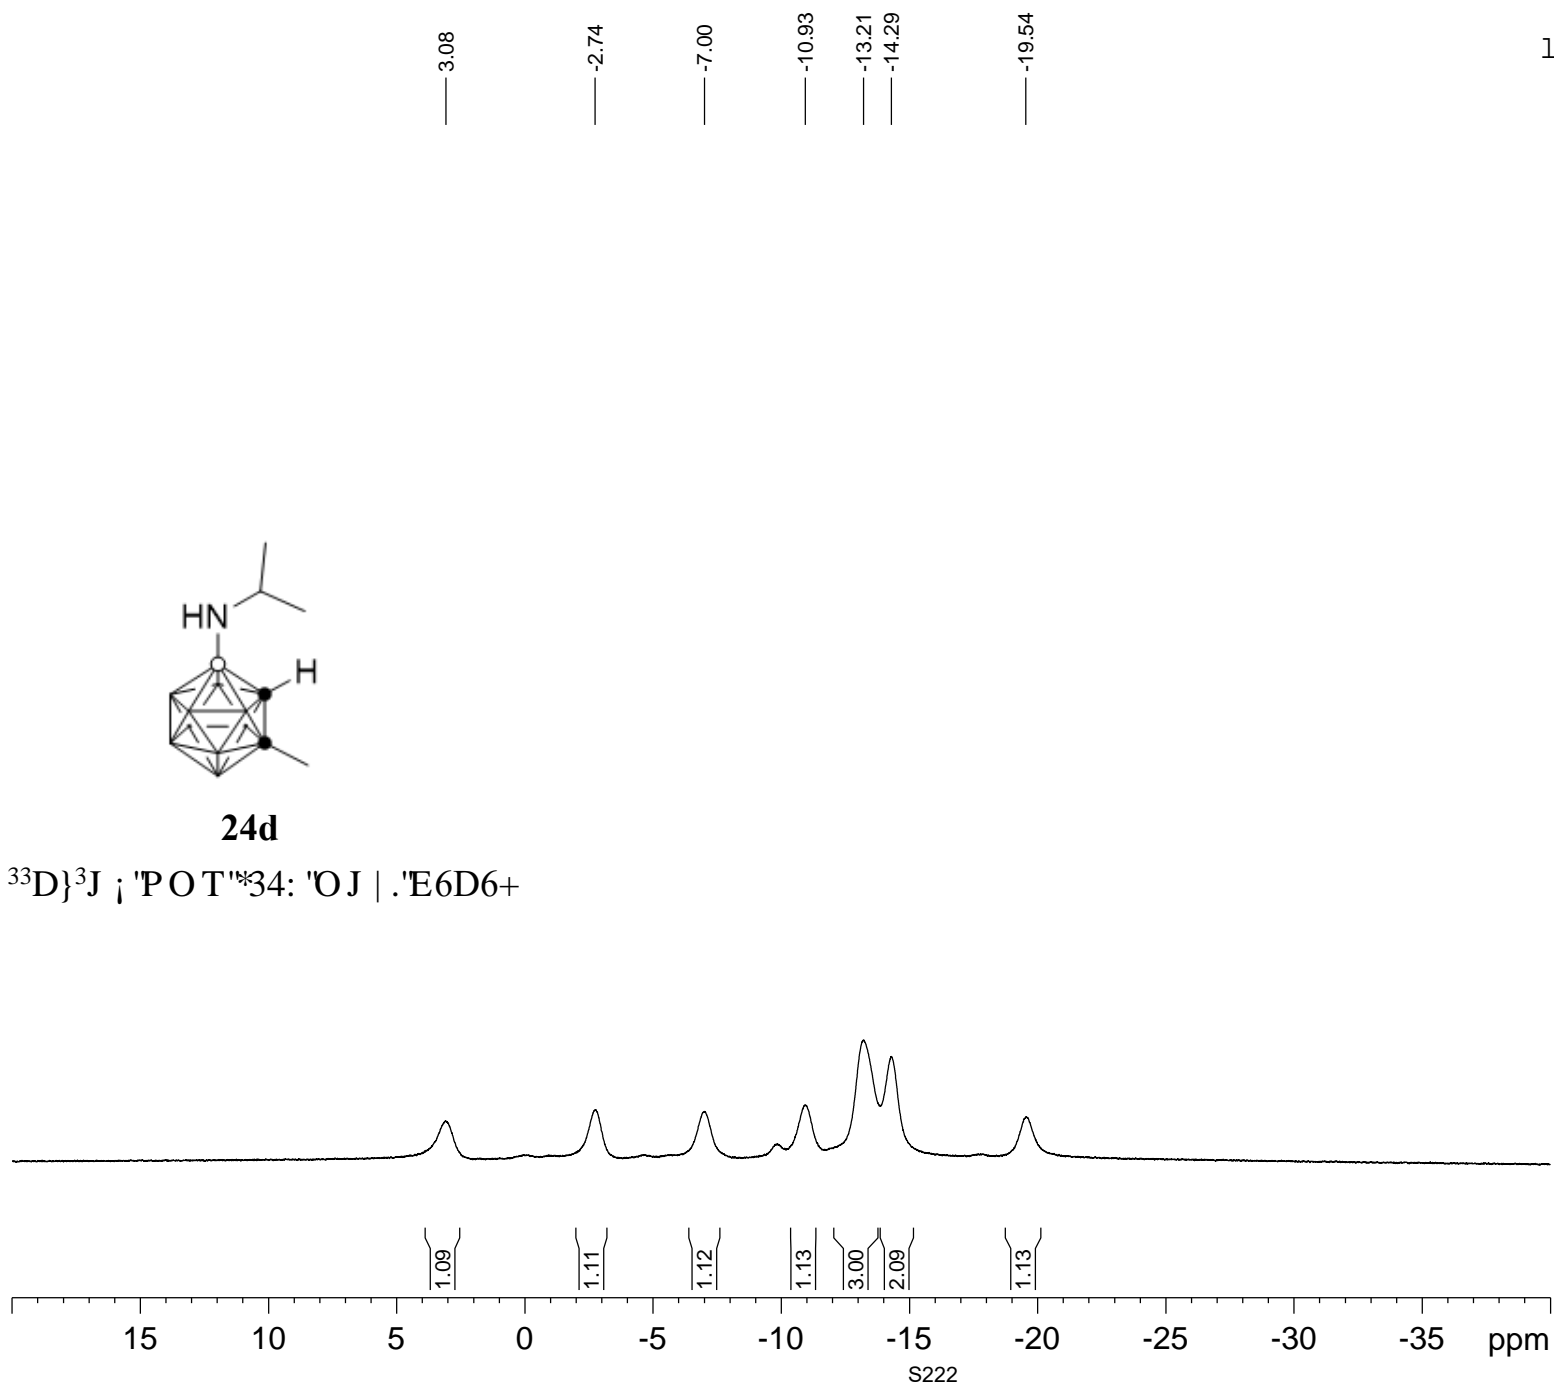

lhr-B-0596-cc-C6D6(C)

Current Data Parameters  
NAME lhr-B-0596-cc-C6D6(C)  
EXPNO 1  
PROCNO 1

F2 - Acquisition Parameters  
Date\_ 20170119  
Time 17.12 h  
INSTRUM spect  
PROBHD z108618\_0257 (  
PULPROG zg  
TD 65536  
SOLVENT C6D6  
NS 20  
DS 2  
SWH 24038.461 Hz  
FIDRES 0.366798 Hz  
AQ 1.3631488 sec  
RG 406  
DW 20.800 usec  
DE 6.50 usec  
TE 294.9 K  
D1 2.00000000 sec  
TD0 1  
SF01 128.4096890 MHz  
NUC1 11B  
P1 7.50 usec  
PLW1 55.09999847 W

F2 - Processing parameters  
SI 32768  
SF 128.4097504 MHz  
WDW EM  
SSB 0  
LB 1.00 Hz  
GB 0  
PC 1.40

3.17  
-2.10  
-3.25  
-6.30  
-7.49  
-10.29  
-11.45  
-12.52  
-13.63  
-14.80  
-18.80  
-20.08

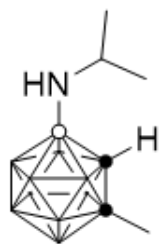

24d

$^{33}\text{D}^{\text{POT}}\text{OJ} \cdot \text{E6D6}^+$

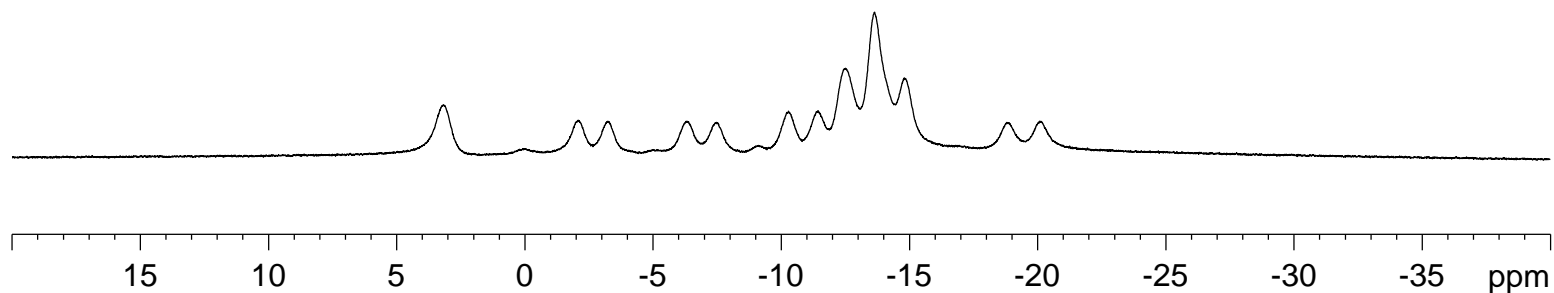

# Thermo QEFMS Analysis Report

## Analysis Info

|               |                                   |                |           |
|---------------|-----------------------------------|----------------|-----------|
| Sample Name : | Uhr-2                             | Reference No.: | aqzwx1548 |
| Instrument :  | Q Exactive Focus Orbitrap         |                |           |
| Source :      | APCI                              | Polarity :     | Positive  |
| Comment :     | APCI, 4uA, by LC, with sheath gas |                |           |

## Accurate Mass Measurement

|                                        |                                                  |
|----------------------------------------|--------------------------------------------------|
| Molecular formula :                    | C <sub>6</sub> H <sub>21</sub> B <sub>10</sub> N |
| Experimental Mass [M+H] <sup>+</sup> : | 216.27521                                        |
| Theoretical Mass [M+H] <sup>+</sup> :  | 216.27504                                        |
| Error (ppm) :                          | 0.8                                              |

D:\Raw data\aqzwx1548

06/17/22 09:40:28

Uhr-2

aqzwx1548 #380-391 RT: 1.70-1.75 AV: 12 SB: 160 0.05-0.76 NL: 1.071  
T: FTMS + p APCI corona Full ms [150.0000-600.0000]

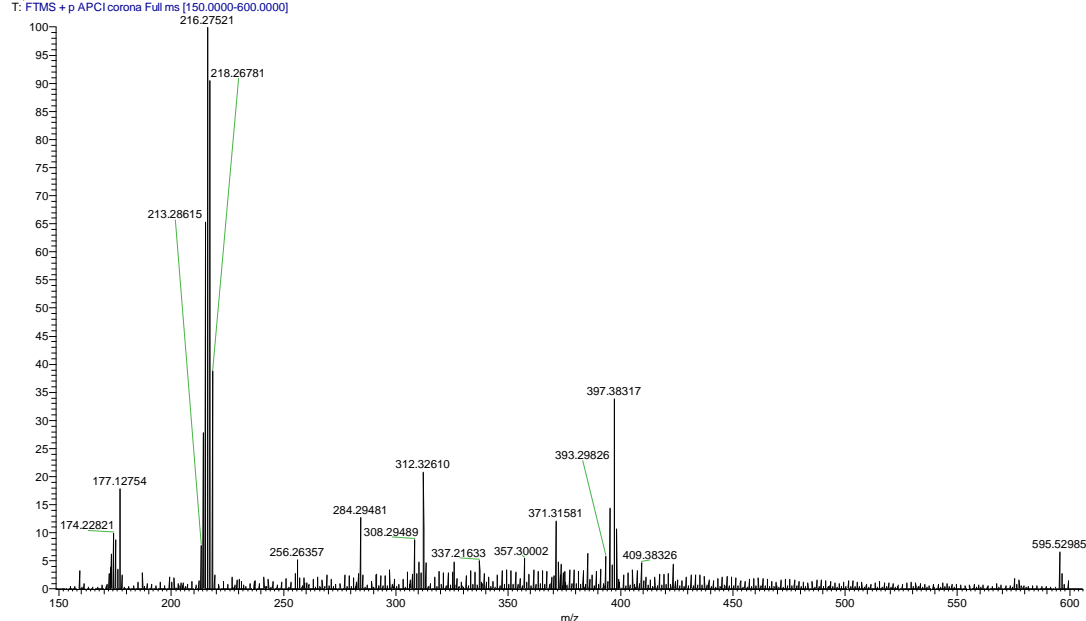

aqzwx1548 #380-391 RT: 1.70-1.75 AV: 12 SB: 160 0.05-0.76 NL: 1.07E7  
T: FTMS + p APCI corona Full ms [150.0000-600.0000]

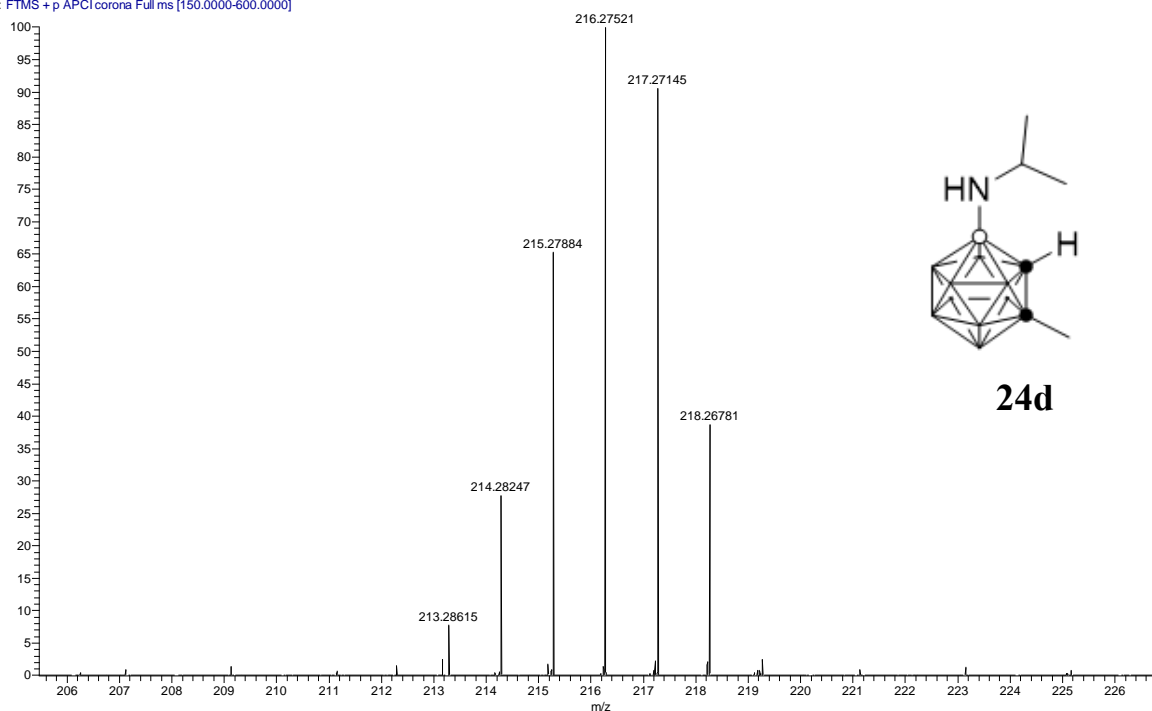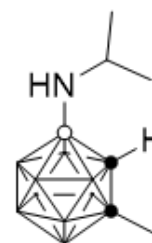

24d

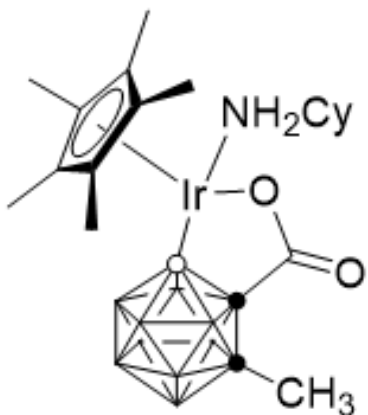

III

$^3\text{J } ^1\text{POT}^*622^{\circ}\text{OJ} | , \text{CD}_2\text{Cl}_2+$

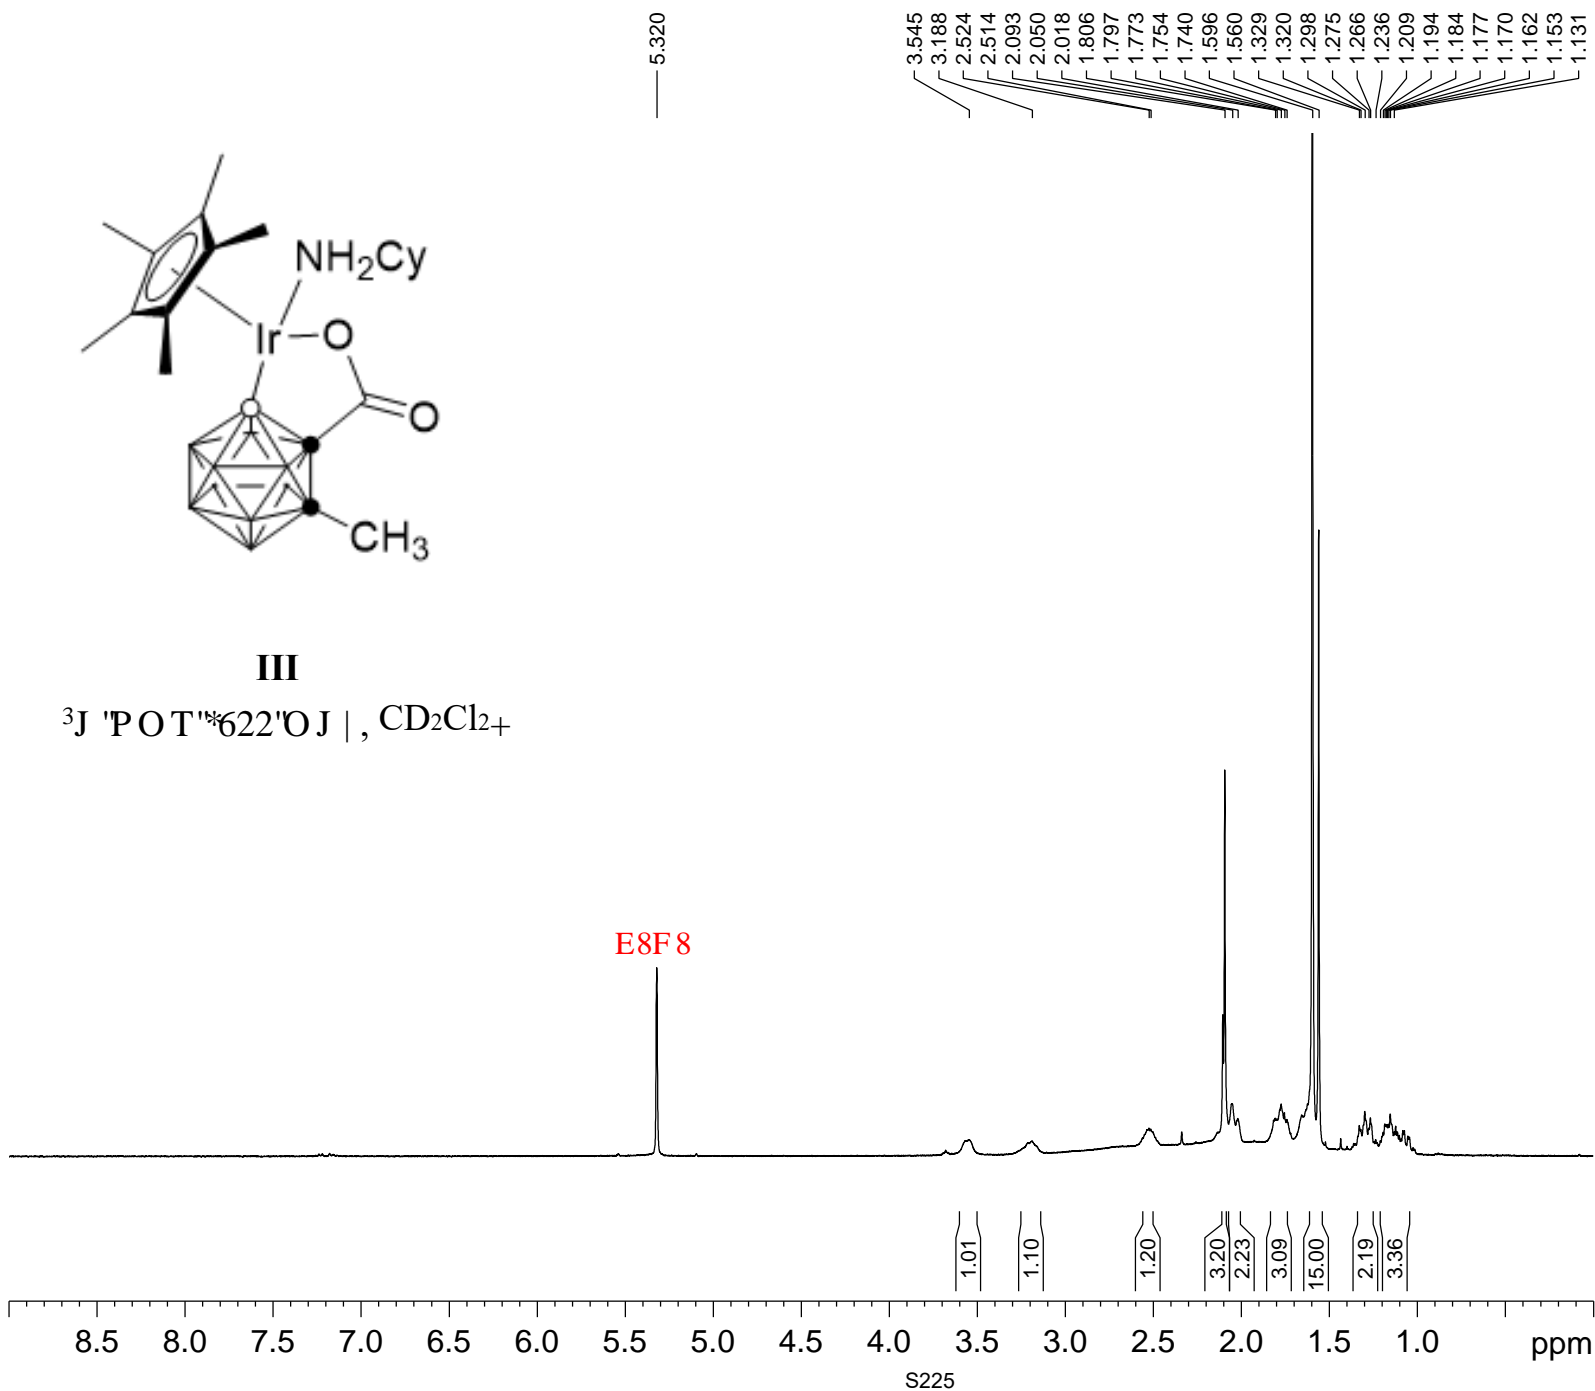

lhr-H-Irim-20180421

Current Data Parameters  
 NAME lhr-H-Irim-20180421-cd  
 EXPNO 1  
 PROCNO 1

F2 - Acquisition Parameters  
 Date\_ 20180421  
 Time 21.34 h  
 INSTRUM spect  
 PROBHD Z108618\_0257 (  
 PULPROG zg30  
 TD 65536  
 SOLVENT CD2Cl2  
 NS 16  
 DS 2  
 SWH 8012.820 Hz  
 FIDRES 0.122266 Hz  
 AQ 4.0894465 sec  
 RG 128  
 DW 62.400 usec  
 DE 6.50 usec  
 TE 295.1 K  
 D1 1.00000000 sec  
 TD0 1  
 SFO1 400.2324714 MHz  
 NUC1 1H  
 P1 12.80 usec  
 PLW1 13.56000042 W

F2 - Processing parameters  
 SI 65536  
 SF 400.2300156 MHz  
 WDW EM  
 SSB 0  
 LB 0.30 Hz  
 GB 0  
 PC 1.00

lhr-C-irim20180421-cd2cl2  
lhr-C-irim20180421-cd2cl2

—172.00

87.41  
87.27

—80.36

55.28  
54.28  
54.06  
53.84  
53.63  
53.41

36.02  
34.80

25.84  
25.51  
22.84

9.43  
9.37

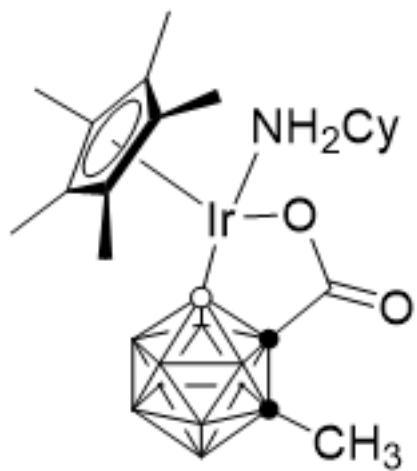

**III**

<sup>35</sup>E} <sup>3</sup>J ; 'POT'\*322'OJ | .'ED2Cl2+

EF2Cl2

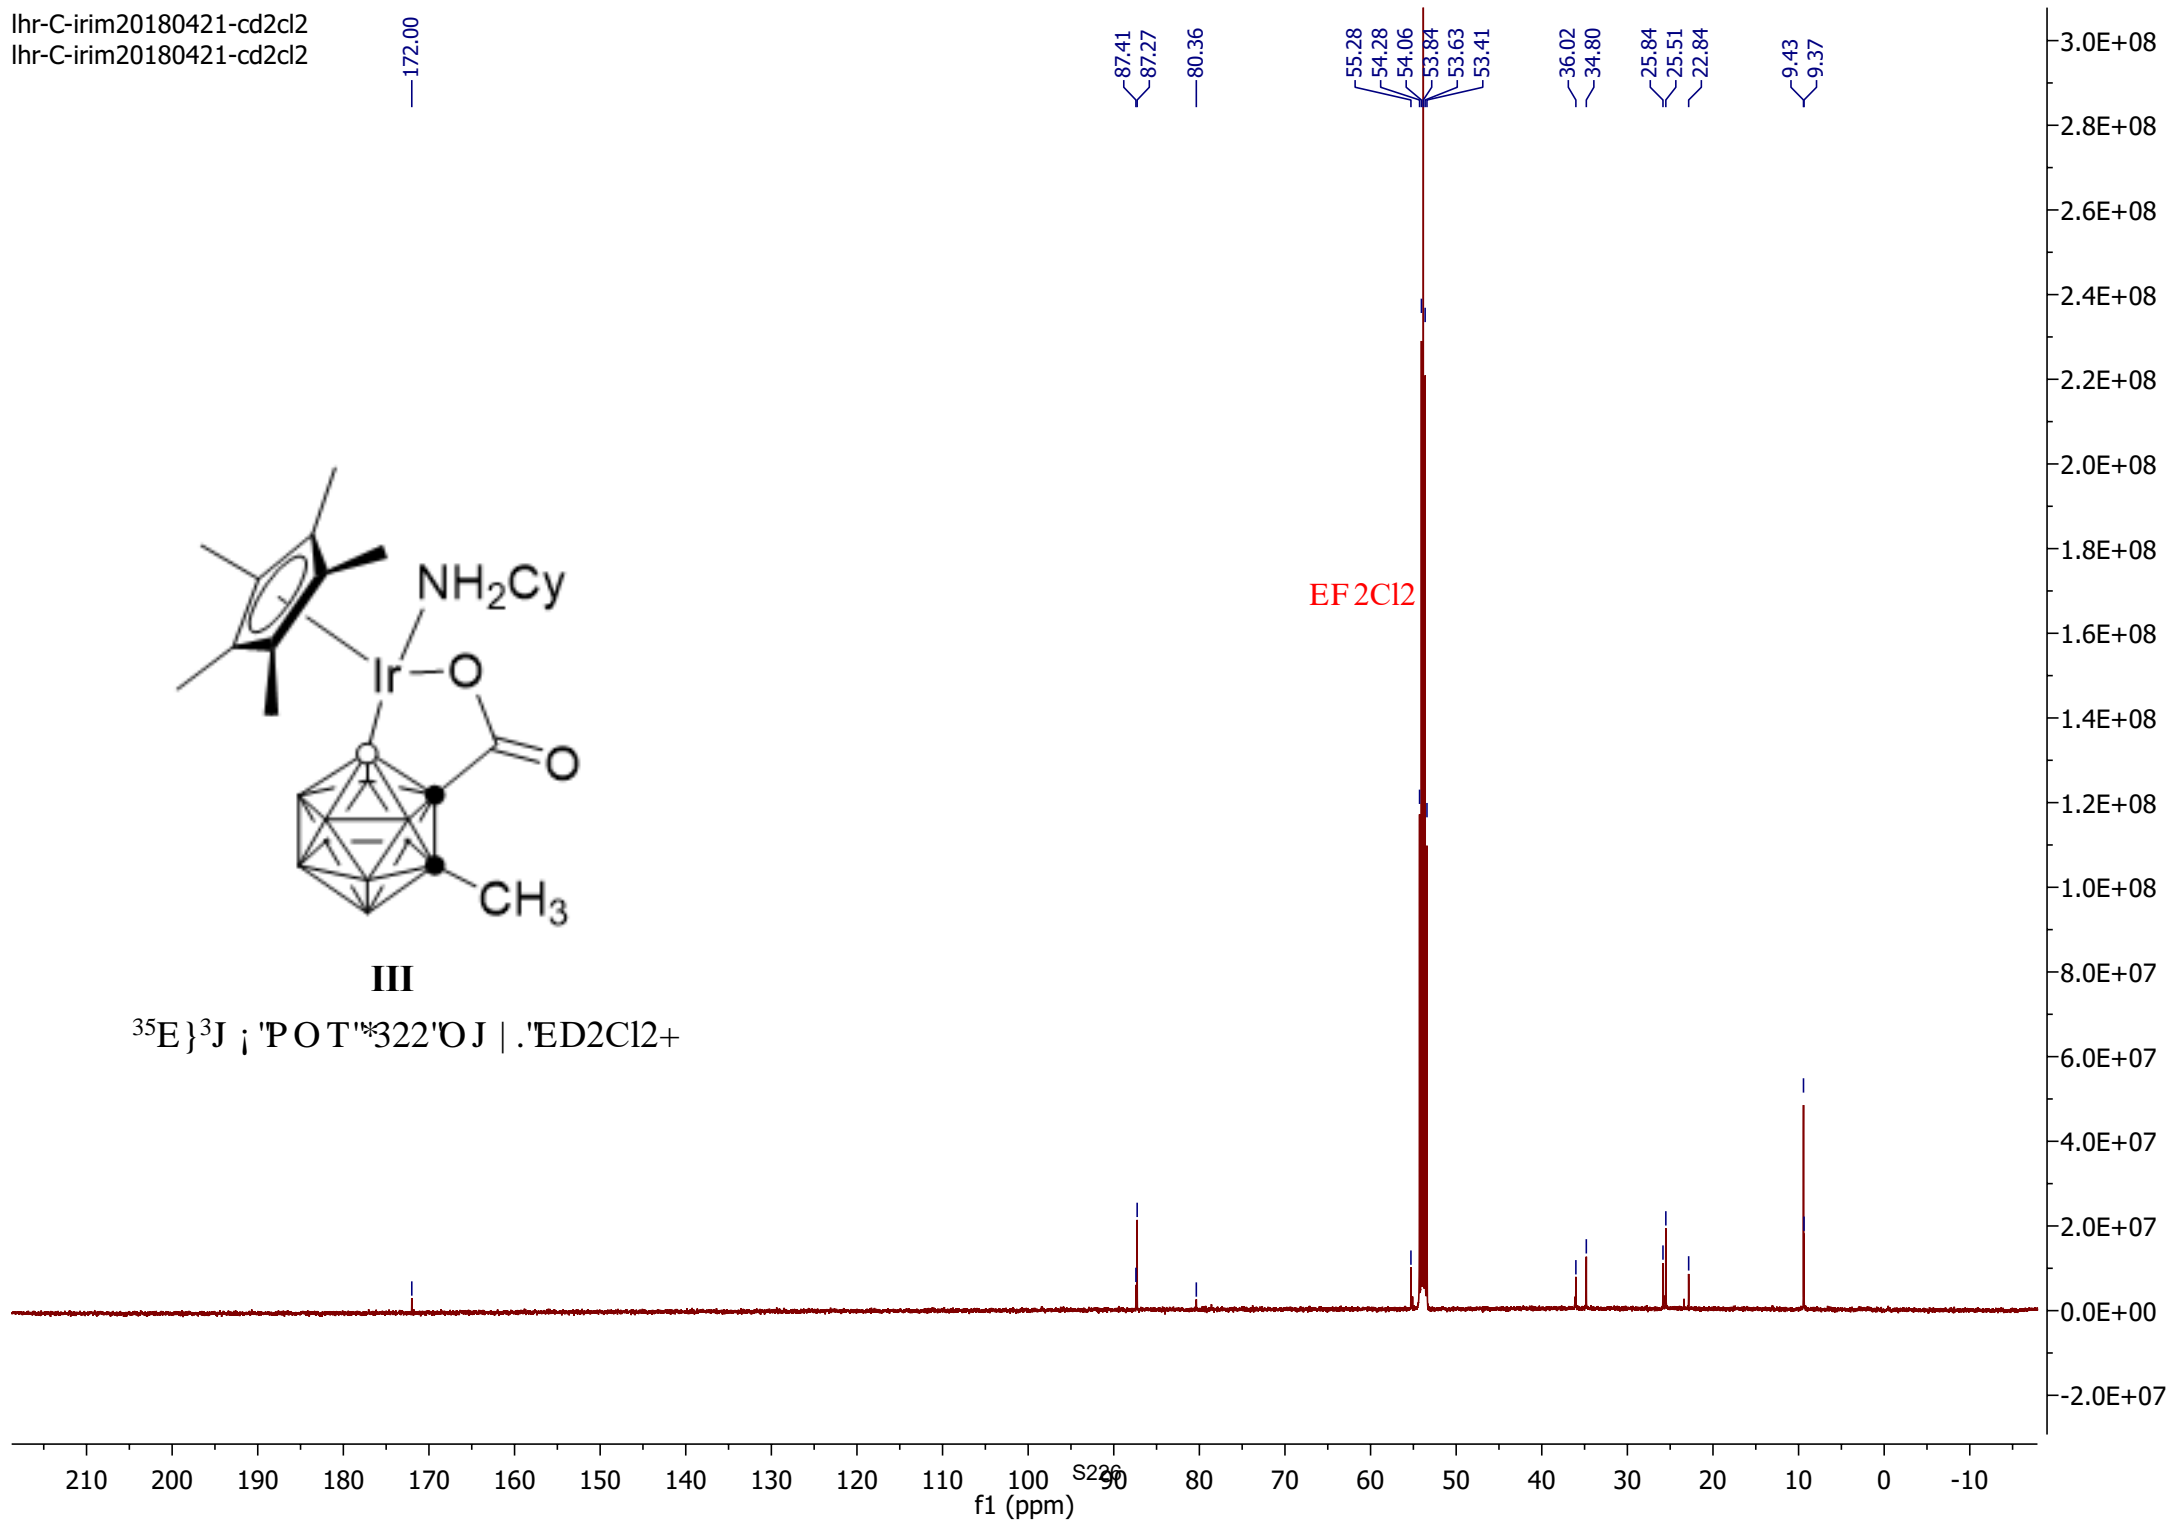

lhr-B-Irim-20180421-cd2c12

— -3.85  
— -6.52  
— -7.97  
— -9.06  
— -9.77  
— -10.53  
— -12.96

Current Data Parameters  
NAME lhr-B-Irim-20180421-cd2c12  
EXPNO 1  
PROCNO 1

F2 - Acquisition Parameters  
Date\_ 20180421  
Time 21.39 h  
INSTRUM spect  
PROBHD Z108618\_0257 (  
PULPROG zgdc  
TD 65536  
SOLVENT CD2C12  
NS 64  
DS 4  
SWH 24038.461 Hz  
FIDRES 0.366798 Hz  
AQ 1.3631488 sec  
RG 406  
DW 20.800 usec  
DE 6.50 usec  
TE 295.7 K  
D1 2.0000000 sec  
D11 0.0300000 sec  
TD0 1  
SFO1 128.4096890 MHz  
NUC1 11B  
P1 7.50 usec  
PLW1 55.09999847 W  
SFO2 400.2316009 MHz  
NUC2 1H  
CPDPRG[2] waltz16  
PCPD2 90.00 usec  
PLW2 13.56000042 W  
PLW12 0.27428001 W

F2 - Processing parameters  
SI 32768  
SF 128.4097615 MHz  
WDW EM  
SSB 0  
LB 1.00 Hz  
GB 0  
PC 1.40

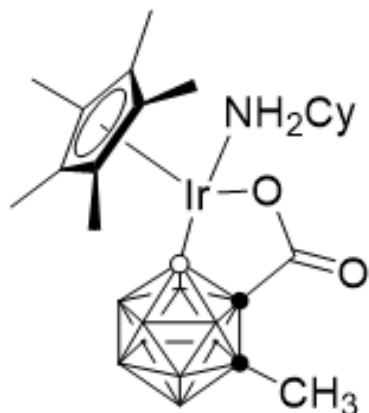

III

$^{33}\text{D}\}^3\text{J}$  ; "POT"\*34: "O J | .", CD2C12+

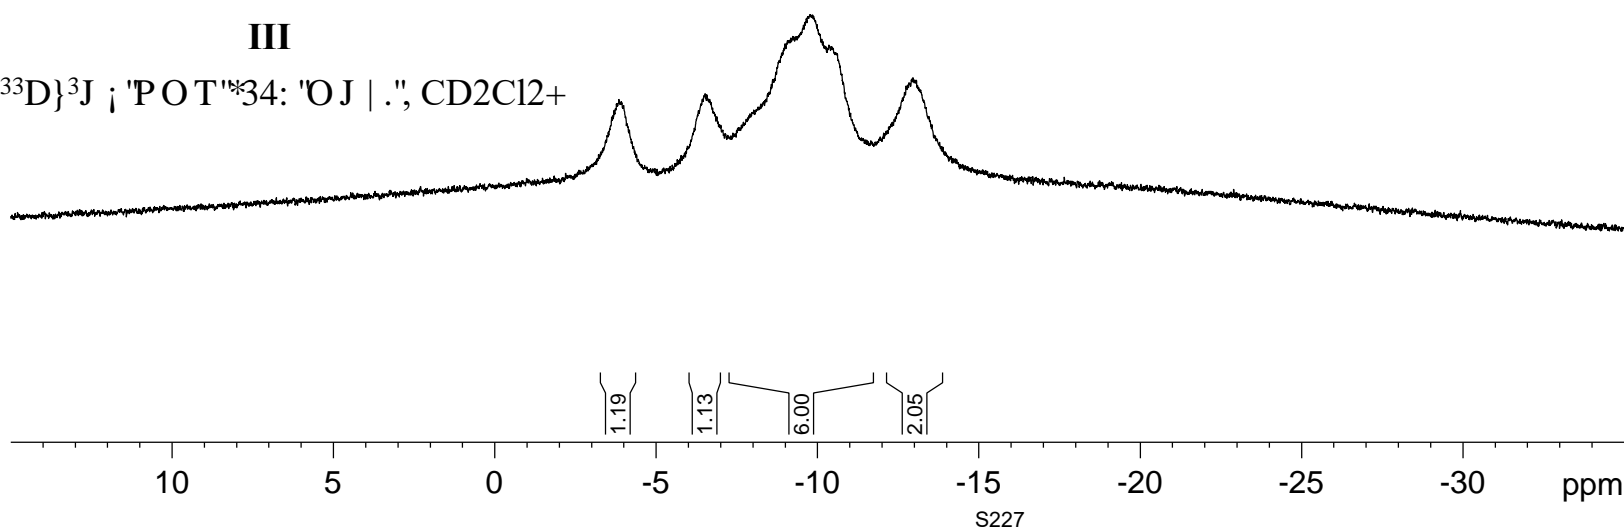

lhr-B-Irim-20180421-cd2cl2(C)

Current Data Parameters  
NAME lhr-B-Irim-20180421-cd2cl2(C)  
EXPNO 1  
PROCNO 1

F2 - Acquisition Parameters  
Date\_ 20180421  
Time 21.43 h  
INSTRUM spect  
PROBHD Z108618\_0257 (  
PULPROG zg  
TD 65536  
SOLVENT CD2Cl2  
NS 64  
DS 2  
SWH 24038.461 Hz  
FIDRES 0.366798 Hz  
AQ 1.3631488 sec  
RG 362  
DW 20.800 usec  
DE 6.50 usec  
TE 295.1 K  
D1 2.0000000 sec  
TD0 1  
SFO1 128.4096890 MHz  
NUC1 11B  
P1 7.50 usec  
PLW1 55.09999847 W

F2 - Processing parameters  
SI 32768  
SF 128.4097430 MHz  
WDW EM  
SSB 0  
LB 1.00 Hz  
GB 0  
PC 1.40

— 3.12  
— 4.29  
— 5.85  
— 7.03  
— 8.11  
— 9.14  
— 9.80  
— 10.91  
— 12.28  
— 13.35

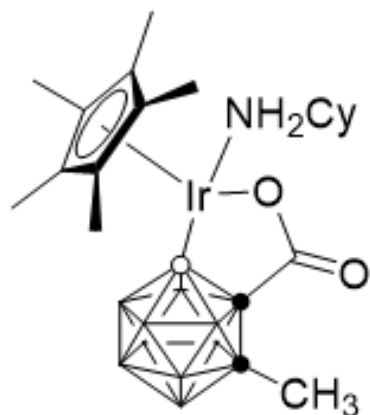

III

<sup>33</sup>D'POT\*34: 'OJ |.', CD2Cl2+

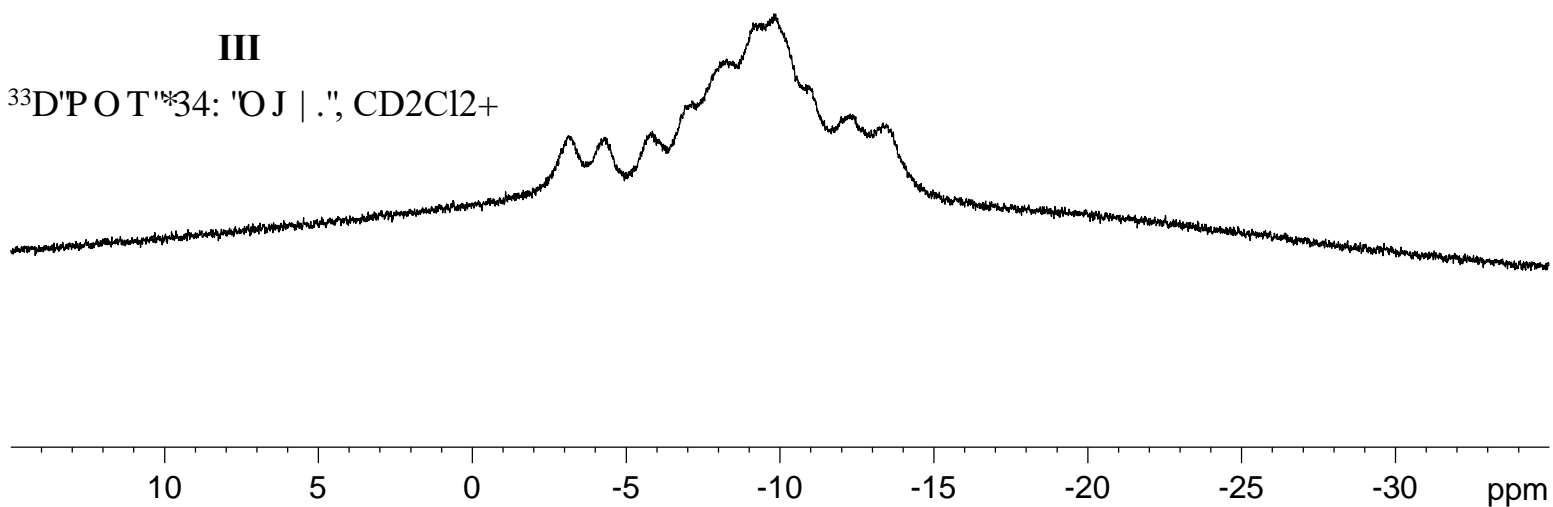

Supplement: d2cc02852b1.pdf [file d2cc02852b1.pdf]
